# Supplementary material
Source: Research Square preprint supplement (doi:10.21203/rs.3.rs-9551458/v1)
Supplement: Supplementary file 1 [file 2c23d18327817472d6207c40.docx]

**Supplementary Figures**


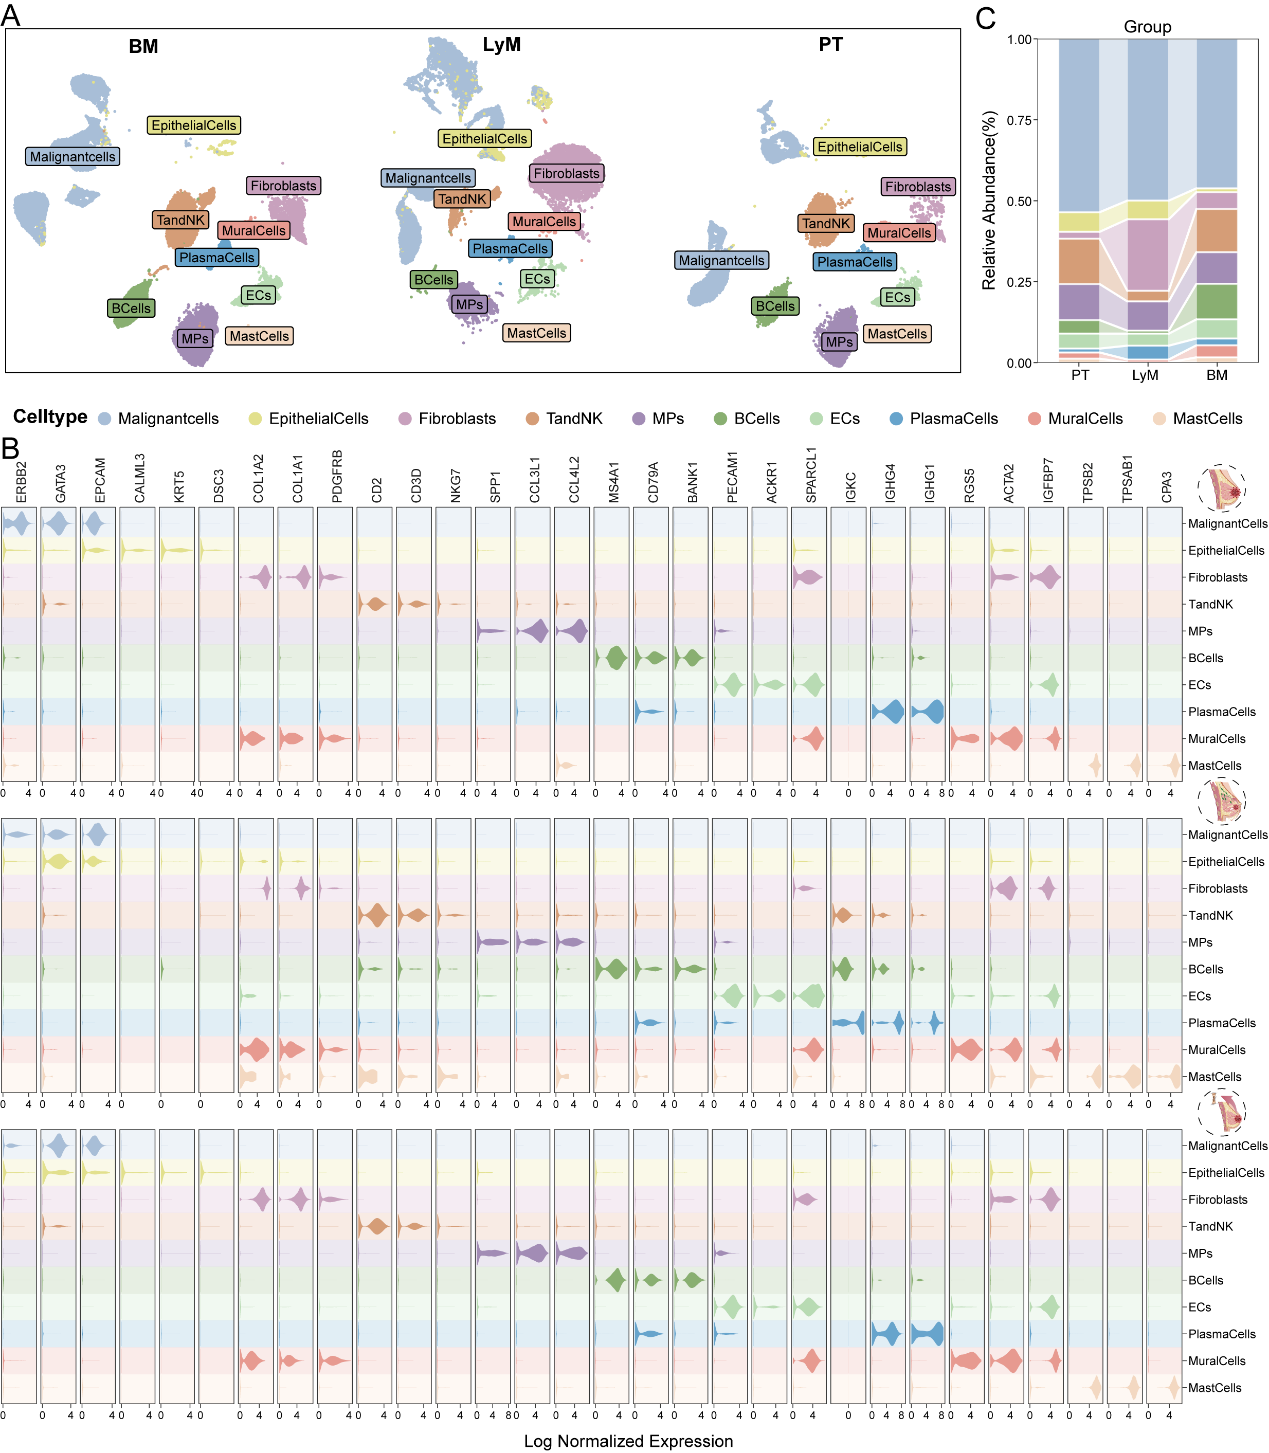


**Figure S1. Cell Distribution and Gene Expression in Different Metastatic Types of Breast Cancer. A.** UMAP plot of tumor tissues from different metastatic directions in breast cancer, displaying 10 cell lineages. Each lineage is represented by a distinct color. **B.** Violin plot displays the expression levels of typical marker genes for cell lineages. **C.** Proportion of cell types in different metastatic directions.


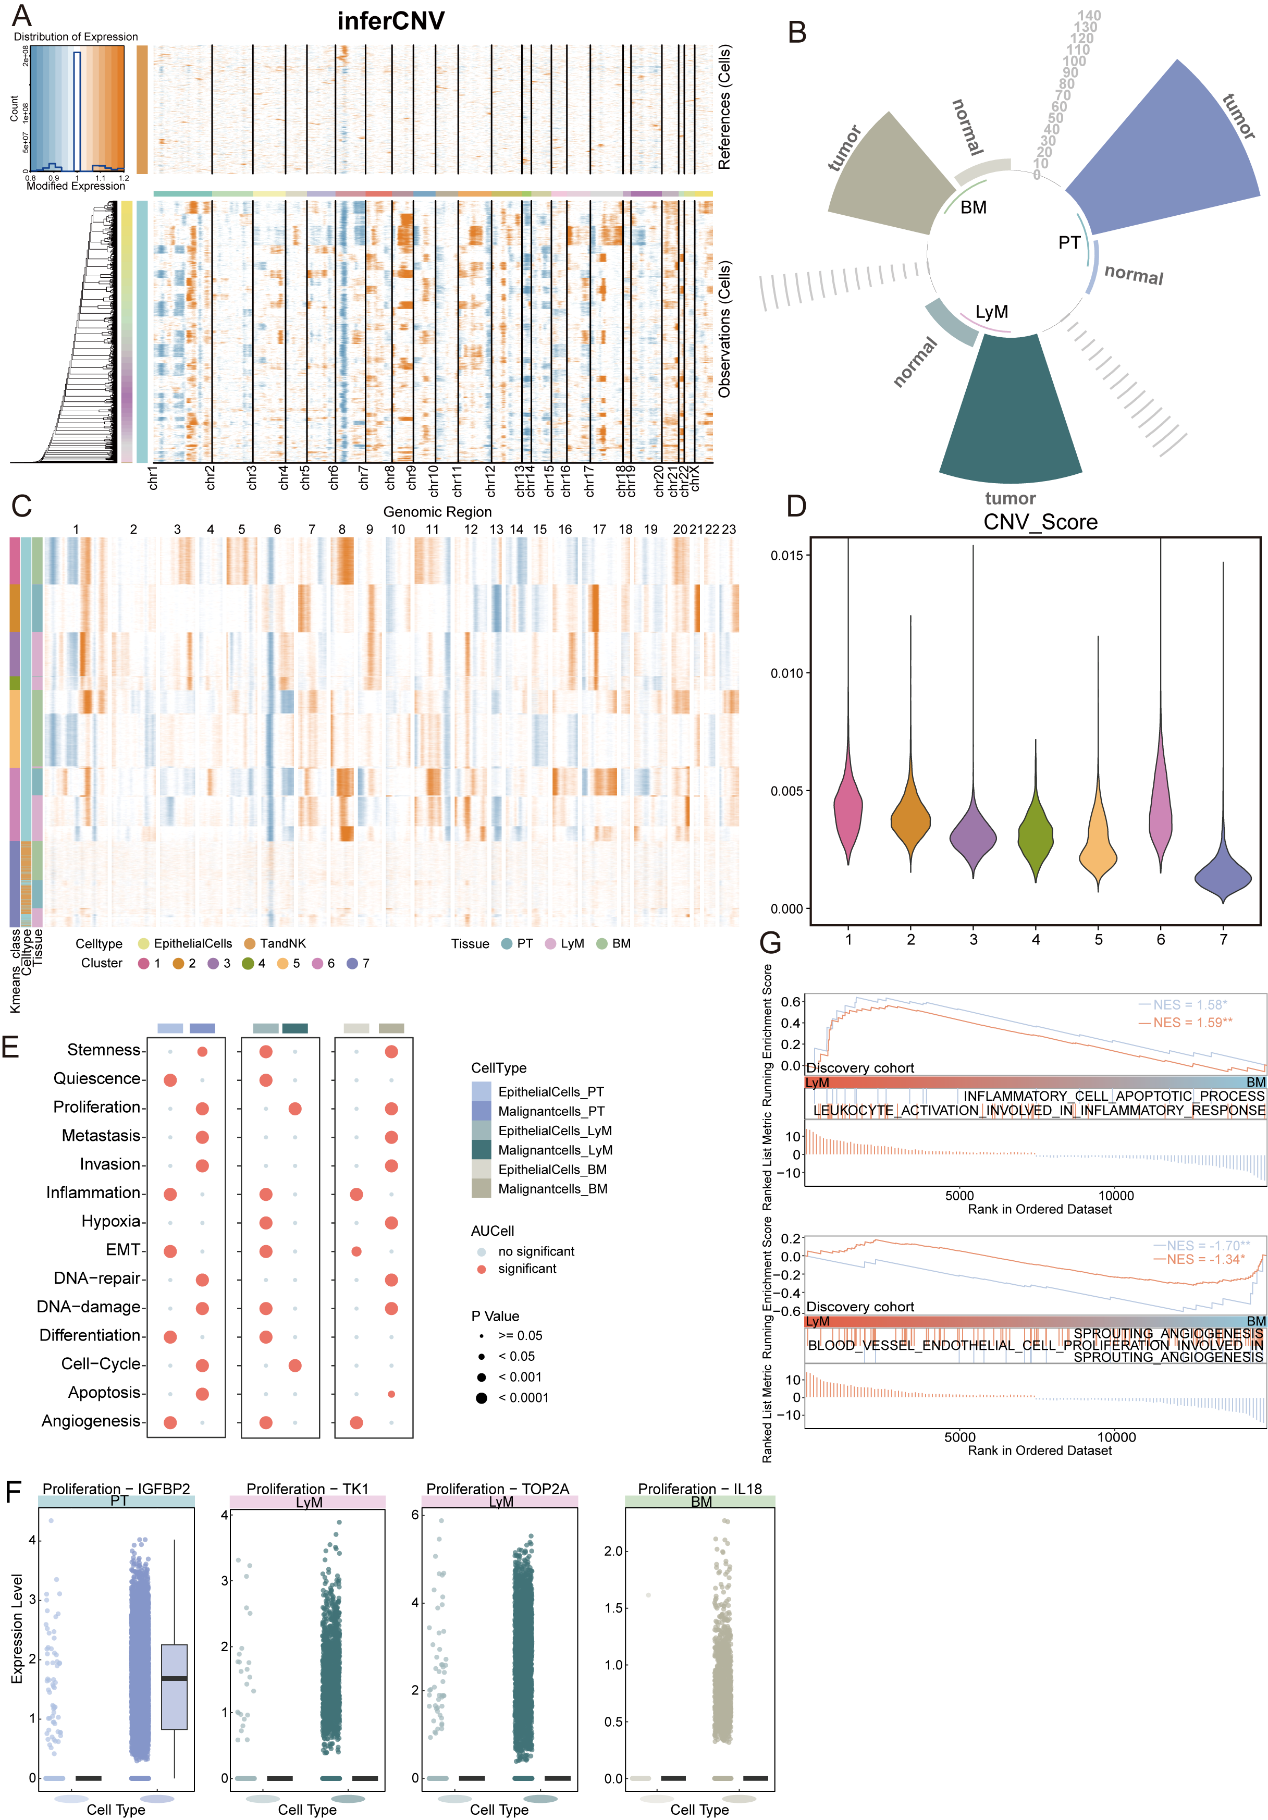


**Figure S2. inferCNV identifies malignant epithelial cells. A.** Hierarchical heatmap displays large-scale CNVs in epithelial cells and T cells from different transfer directions. T cells serve as the control reference. Orange: gains; Blue: losses. **B.** Circle diagram shows the number of malignant cells and non-malignant cells in different migration directions. **C.** Chromosomal landscape of inferred single-cell CNV profiles in epithelial cells. Using k-means clustering based on single-cell CNV profiles, epithelial cells and T cells were divided into seven CNV clusters. Unsupervised k-means clustering distinguished malignant cells from non-malignant cells. **D.** Violin plot displays the copy number variation score distribution across seven CNV clusters. **E.** Dotplotdisplays AUcell scores for malignant epithelial cells and non-malignant epithelial cells across 14 functional states of CancerSEA in different metastasis directions. Point size indicates P-value, while point color denotes statistical significance. **F.** Box plots reveal differential expression of proliferation-related genes in metastatic cancer cell clusters. **G.** Two major enriched pathways for differentially expressed genes between lymph node-derived and bone metastasis-derived cancer cells identified by GSEA.


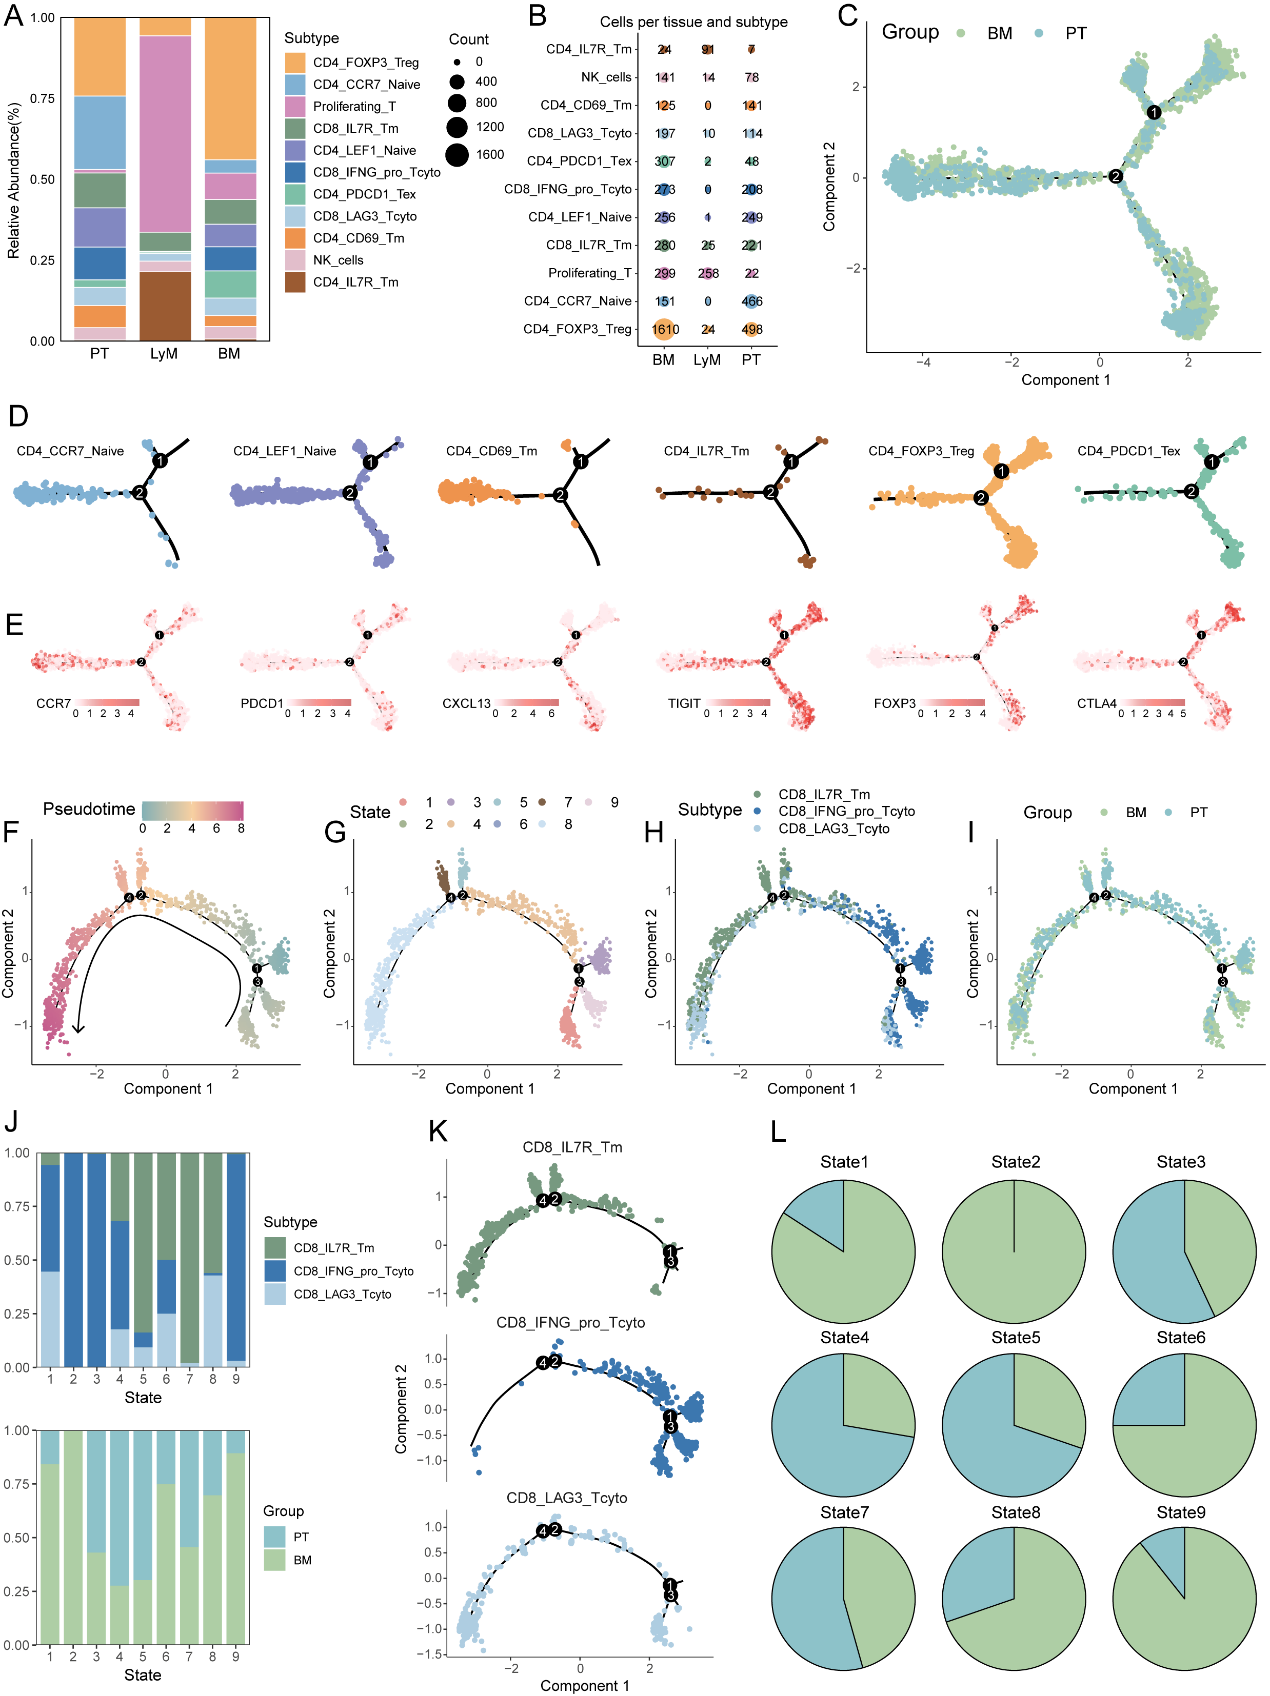


**Figure S3. T cells evolutionary trajectory. A.** Proportion of T cell subsets and NK cells in different metastatic directions. **B.** T cell subtypes and NK cells in different metastatic directions. **C.** Investigating CD4+ T cell subtypes using semi-supervised pseudo-time trajectories with Monocle2. Trajectories are colored by different metastasis types. **D.** Investigating CD4+ T cell subtypes using semi-supervised pseudo-time trajectories with Monocle2. Trajectories are colored by cell subtype. **E.** Semi-supervised pseudo-time trajectories of CD4+ T cell subtypes. Trajectories are colored by gene expression values. **F.** Investigating CD8+ T cell subtypes using semi-supervised pseudo-time trajectories with Monocle2. Trajectories are colored by pseudotime. **G.** Investigating CD8+ T cell subtypes using semi-supervised pseudo-time trajectories with Monocle2. Trajectories are colored by cell state. **H.** Investigating CD8+ T cell subtypes using semi-supervised pseudo-time trajectories with Monocle2. Trajectories are colored by cell subtype. **I.** Investigating CD8+ T cell subtypes using semi-supervised pseudo-time trajectories with Monocle2. Trajectories are colored by different metastasis directions. **J.** Bar plot displays the proportion of cells in each subtype across different cellular states and across different metastasis types. **K.** Investigating CD8+ T cell subtypes using semi-supervised pseudo-time trajectories with Monocle2. Trajectories are colored by cell subtype. **L.** Pie plot shows the proportion of migration directions in different cell states.


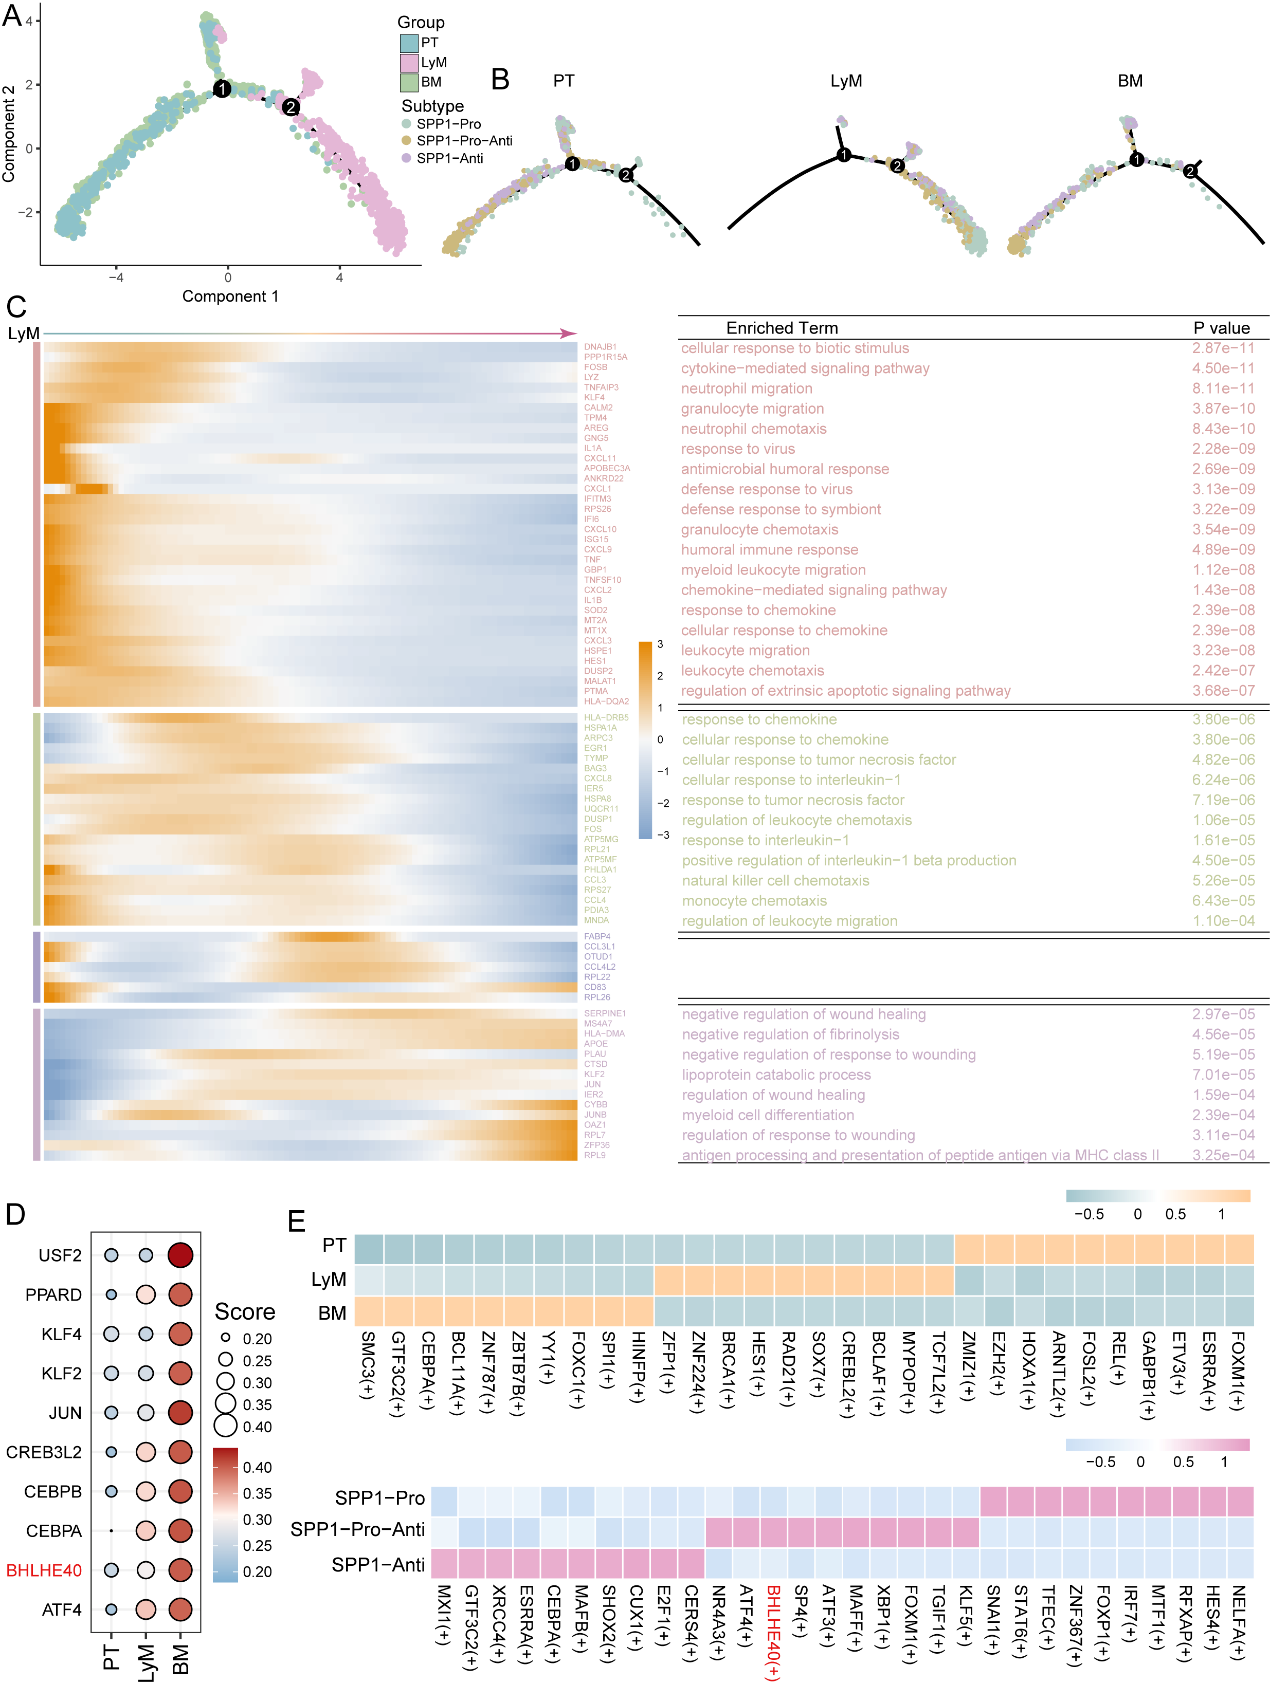
 **Figure S4. Macrophage evolutionary trajectory. A.** Investigating SPP1+ macrophage subclusters using semi-supervised pseudo-time trajectories with Monocle2. Trajectories are colored by different metastasis directions. **B.** Investigating SPP1+ macrophage subclusters using semi-supervised pseudo-time trajectories with Monocle2. Trajectories are colored by cell subtype. **C.** Heatmap showing genes associated with the evolutionary trajectory from SPP1+ proinflammatory to anti-inflammatory macrophages in lymph node metastasis, along with corresponding GO terms. **D.** Activity of bone metastasis-specific transcription factors in different metastatic directions. **E.** Top: Activity of transcription factors with different translocation directions. Bottom: Activity of transcription factors in different macrophage subtypes.


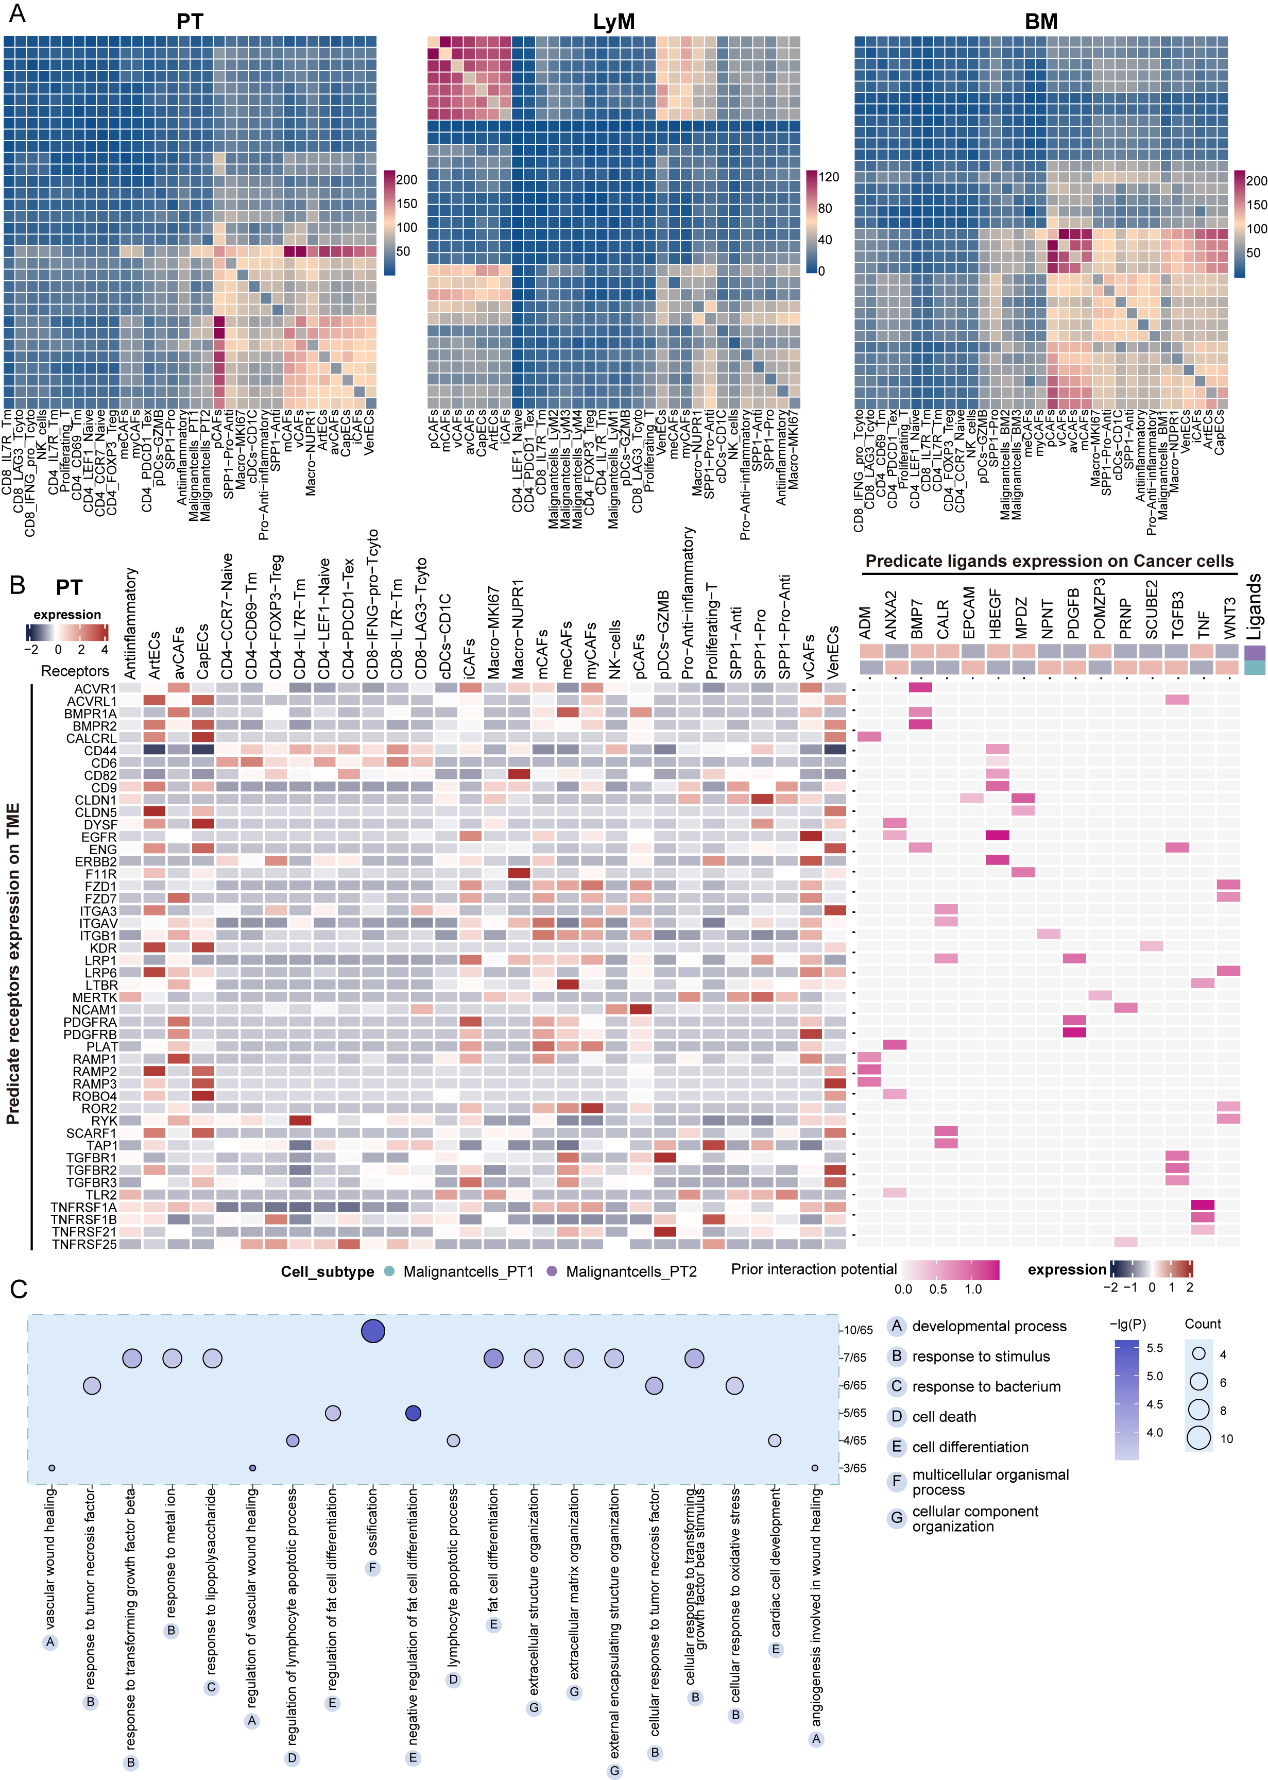
 **Figure S5. Intercellular interactions in different metastasis types. A.** CellPhonedB cell interaction heatmap for different combination of metastasis directions, with colors representing the number of donor-acceptor pairs. **B.** NicheNet predicts ligands regulating non-cancerous cell expression by cancer cells in untransferred samples (top). Heatmap of receptor expression associated with different TME subtypes (left). Heatmap of key ligand-receptor pairs between tumor cells and TME cells (center). **C.** Bubble plot displays the GO functional enrichment results (top 20) for target genes interacting with non-transferred cells. Letters denote the major functional description categories.

**Supplemental information**

**Table S1.** Excel file containing additional data too large to fit in a PDF, related to Figure1. Sample information.

**Table S2.** Excel file containing additional data too large to fit in a PDF, related to Figure1. Gene Ontology (GO) terms used to identify cell types.

**Table S3.** Excel file containing additional data too large to fit in a PDF, related to Figure2. Malignant cell clusters difference genes.

**Table S4.** Excel file containing additional data too large to fit in a PDF, related to Figure2. Gene Ontology (GO) terms for genes differing between non-metastatic and lymph node metastatic samples.

**Table S5.** Excel file containing additional data too large to fit in a PDF, related to Figure2. Gene Ontology (GO) terms for genes differing between non-metastatic and bone metastatic samples.

**Table S6.** Excel file containing additional data too large to fit in a PDF, related to Figure6. Gene Ontology (GO) terms for target genes.
