# Supplementary material
Source: Research Square preprint supplement (doi:10.21203/rs.3.rs-9551458/v1)
Supplement: Supplementary file 1 [file 2069885f78640590a3508432.xlsx]

## Sheet: diff_gene_GO_enrich_BP_PT_LYM_n
Biological processes (BP) that differ between PT and LyM
ID	Description	GeneRatio	BgRatio	RichFactor	FoldEnrichment	zScore	pvalue	p.adjust	qvalue	geneID	Count
GO:0097191	extrinsic apoptotic signaling pathway	26/580	237/18805	0.109704641350211	3.55688927688055	7.06657350312362	2.27055807019451e-08	5.20847095476579e-05	4.59957735714983e-05	PRDX2/KLF4/PMAIP1/MCL1/BAG3/NDUFA13/PYCARD/PEA15/HSPA1A/CYLD/TNFSF10/FAF1/WWOX/RIPK1/BEX3/GCLC/HIPK1/RAF1/YAP1/NFKBIZ/TNF/HTT/BMPR1B/HSPA1B/PIK3R1/ERBB3	26
GO:2001233	regulation of apoptotic signaling pathway	35/580	399/18805	0.087719298245614	2.84407138535995	6.64186153443483	3.05856240042842e-08	5.20847095476579e-05	4.59957735714983e-05	RPL26/PRDX2/KLF4/PMAIP1/MYC/MCL1/PCGF2/SNAI1/PYCARD/TRAF7/IER3/BCLAF1/PEA15/HSPA1A/S100A8/CLU/CYLD/EEF1E1/TNFSF10/S100A9/FAF1/WWOX/RIPK1/GCLC/NFATC4/RAF1/TAF9/YAP1/TNF/EIF2AK3/HTT/RTKN2/BMPR1B/HSPA1B/MUC1	35
GO:2001235	positive regulation of apoptotic signaling pathway	20/580	149/18805	0.134228187919463	4.35200185142328	7.32813509573338	3.39166765016223e-08	5.20847095476579e-05	4.59957735714983e-05	RPL26/PMAIP1/MYC/MCL1/PYCARD/TRAF7/BCLAF1/PEA15/S100A8/CLU/CYLD/EEF1E1/TNFSF10/S100A9/FAF1/WWOX/RIPK1/NFATC4/TNF/BMPR1B	20
GO:1903706	regulation of hemopoiesis	35/580	436/18805	0.0802752293577982	2.60271670357482	6.04035690308229	2.67938858235762e-07	0.000308598579973038	0.00027252202291611	AMBRA1/CEBPB/PRDX2/MYC/ZFP36/MED1/KLF10/BRD2/BCL6/JUNB/SOCS1/EIF6/HSPA1A/MYB/MAFB/CYLD/LTF/LEF1/ZFPM1/RIPK1/RHOH/FOXP1/LDB1/LGALS1/SMARCC2/KAT2A/PGLYRP2/NRARP/NFKBIZ/TNF/EGR3/PPP3CA/LEO1/HSPA1B/PIK3R1	35
GO:2001236	regulation of extrinsic apoptotic signaling pathway	19/580	165/18805	0.115151515151515	3.73349007314525	6.29132134895186	8.45894738327531e-07	0.000779407411894987	0.000688291192344401	PRDX2/KLF4/PMAIP1/MCL1/PYCARD/PEA15/HSPA1A/CYLD/TNFSF10/FAF1/WWOX/RIPK1/GCLC/RAF1/YAP1/TNF/HTT/BMPR1B/HSPA1B	19
GO:0061138	morphogenesis of a branching epithelium	20/580	191/18805	0.104712041884817	3.39501715111031	5.93486447608982	1.97991023111629e-06	0.00132857631285146	0.00117325978754776	PGR/SPINT2/FRS2/MYC/ESR1/MED1/SOCS3/ADM/LEF1/MSX2/SEMA3E/GPC3/NFATC4/HOXB7/NRARP/YAP1/TNF/EXT1/NPNT/AREG	20
GO:0030099	myeloid cell differentiation	34/580	455/18805	0.0747252747252747	2.42277377794619	5.48060958639051	2.01867466680274e-06	0.00132857631285146	0.00117325978754776	CEBPB/MYC/ZFP36/MED1/KLF10/BCL6/JUNB/ITGB6/SOCS1/EIF6/HSPA1A/MYB/MAFB/LTF/KLF2/TPM4/CDKN1C/LEF1/ZFPM1/RIPK1/FOXP1/LDB1/GPC3/HOXB7/MT1G/TNF/TGFBR3/CDKN2B/FARP2/PPP3CA/LEO1/HSPA1B/DHRS7B/PIK3R1	34
GO:0001649	osteoblast differentiation	23/580	262/18805	0.0877862595419847	2.84624	5.36852183954507	7.11945735824001e-06	0.0032795647129692	0.00289616889987226	HSPE1/IL6ST/CEBPB/JUND/IGFBP2/CEBPD/IGFBP5/SNAI1/JUNB/ALYREF/LTF/TPM4/FHL2/LEF1/WWOX/MSX2/BCAP29/YAP1/TNF/PPP3CA/BMPR1B/NPNT/AREG	23
GO:0001763	morphogenesis of a branching structure	20/580	208/18805	0.0961538461538462	3.11753978779841	5.47831689822853	7.3072375409987e-06	0.0032795647129692	0.00289616889987226	PGR/SPINT2/FRS2/MYC/ESR1/MED1/SOCS3/ADM/LEF1/MSX2/SEMA3E/GPC3/NFATC4/HOXB7/NRARP/YAP1/TNF/EXT1/NPNT/AREG	20
GO:1902105	regulation of leukocyte differentiation	27/580	340/18805	0.0794117647058823	2.57472109533469	5.22725633368324	7.62740778627721e-06	0.0032795647129692	0.00289616889987226	AMBRA1/CEBPB/PRDX2/MYC/KLF10/BRD2/BCL6/JUNB/SOCS1/MAFB/CYLD/LTF/LEF1/ZFPM1/RIPK1/RHOH/FOXP1/LGALS1/SMARCC2/KAT2A/PGLYRP2/NRARP/NFKBIZ/TNF/EGR3/PPP3CA/PIK3R1	27
GO:0045333	cellular respiration	22/580	245/18805	0.0897959183673469	2.91140042223786	5.37218652767362	7.8305213463558e-06	0.0032795647129692	0.00289616889987226	COX6A1/ATP5MF/UQCR11/COX8A/ATP5MG/NDUFC2/NDUFA11/NDUFA13/OGDH/ATP5PO/MTFR1/UQCRHL/SDHA/DNAJC15/BLOC1S1/NNT/NDUFB8/SLC25A25/NFATC4/IMMP2L/TNF/ETFB	22
GO:2001238	positive regulation of extrinsic apoptotic signaling pathway	10/580	58/18805	0.172413793103448	5.59007134363853	6.24558168032371	9.9135456452122e-06	0.00380597539895772	0.00336103981743379	PMAIP1/PYCARD/PEA15/CYLD/TNFSF10/FAF1/WWOX/RIPK1/TNF/BMPR1B	10
GO:0042093	T-helper cell differentiation	12/580	86/18805	0.13953488372093	4.52405773857257	5.84327422650145	1.26281147886436e-05	0.00415243185927694	0.0036669939648145	IL6ST/BRD2/BCL6/JUNB/SOCS3/MYB/LEF1/ZFPM1/FOXP1/LGALS1/NFKBIZ/PIK3R1	12
GO:0097193	intrinsic apoptotic signaling pathway	26/580	330/18805	0.0787878787878788	2.55449320794148	5.08228393950974	1.28844879884639e-05	0.00415243185927694	0.0036669939648145	HSPE1/CEBPB/RPL26/PMAIP1/MYC/MCL1/PPP1R15A/SNAI1/PYCARD/IER3/BCLAF1/HSPA1A/S100A8/CLU/CYLD/S100A9/WWOX/HIPK1/PPP1R13B/NFATC4/TAF9/TNF/EIF2AK3/RTKN2/MUC1/PIK3R1	26
GO:0015980	energy derivation by oxidation of organic compounds	27/580	352/18805	0.0767045454545455	2.48694651253918	5.02387166799116	1.42964217561085e-05	0.00415243185927694	0.0036669939648145	COX6A1/ATP5MF/UQCR11/COX8A/IL6ST/ATP5MG/NDUFC2/NDUFA11/NDUFA13/OGDH/ATP5PO/MTFR1/UQCRHL/SDHA/DNAJC15/BLOC1S1/NNT/IRS1/NDUFB8/SLC25A25/NFATC4/PPP1CB/IMMP2L/TNF/ETFB/INSR/AGL	27
GO:0034620	cellular response to unfolded protein	13/580	102/18805	0.127450980392157	4.13226842461122	5.65859707854331	1.51422547816417e-05	0.00415243185927694	0.0036669939648145	BAG3/HSPB8/PPP1R15A/AGR2/AMFR/PPP1R15B/RNF7/HSPA1A/TMBIM4/RHBDD1/EIF2AK3/COPS5/PIK3R1	13
GO:0002294	CD4-positive, alpha-beta T cell differentiation involved in immune response	12/580	88/18805	0.136363636363636	4.42123824451411	5.73867835225854	1.60384717599335e-05	0.00415243185927694	0.0036669939648145	IL6ST/BRD2/BCL6/JUNB/SOCS3/MYB/LEF1/ZFPM1/FOXP1/LGALS1/NFKBIZ/PIK3R1	12
GO:0045637	regulation of myeloid cell differentiation	20/580	220/18805	0.0909090909090909	2.9474921630094	5.18335705171541	1.67873570519888e-05	0.00415243185927694	0.0036669939648145	CEBPB/MYC/ZFP36/MED1/KLF10/EIF6/HSPA1A/MYB/MAFB/LTF/LEF1/ZFPM1/RIPK1/FOXP1/LDB1/TNF/PPP3CA/LEO1/HSPA1B/PIK3R1	20
GO:0002287	alpha-beta T cell activation involved in immune response	12/580	89/18805	0.134831460674157	4.37156141030608	5.68754582756721	1.80266197494115e-05	0.00415243185927694	0.0036669939648145	IL6ST/BRD2/BCL6/JUNB/SOCS3/MYB/LEF1/ZFPM1/FOXP1/LGALS1/NFKBIZ/PIK3R1	12
GO:0002293	alpha-beta T cell differentiation involved in immune response	12/580	89/18805	0.134831460674157	4.37156141030608	5.68754582756721	1.80266197494115e-05	0.00415243185927694	0.0036669939648145	IL6ST/BRD2/BCL6/JUNB/SOCS3/MYB/LEF1/ZFPM1/FOXP1/LGALS1/NFKBIZ/PIK3R1	12
GO:0043484	regulation of RNA splicing	18/580	187/18805	0.0962566844919786	3.12087405495113	5.19965488325407	2.04445076447066e-05	0.00443302479716248	0.0039147843307171	RPS26/HNRNPA1/SLC38A2/GRSF1/CCNL2/SF3B3/HSPA1A/POLR2A/NUP98/RBM15B/TIA1/RBM24/HOXB-AS3/LARP7/KAT2A/TAF9/USP22/PIK3R1	18
GO:0009199	ribonucleoside triphosphate metabolic process	22/580	261/18805	0.0842911877394636	2.73292376800106	5.02925147837888	2.11692089293628e-05	0.00443302479716248	0.0039147843307171	ATP5MF/ATP5MG/NDUFC2/NDUFA11/NDUFA13/OGDH/ATP5PO/NME1/IER3/EIF6/CTPS2/HSPA1A/SDHA/UCK2/PPP2CA/NDUFB8/SLC25A25/BLOC1S6/FOXK2/ENO2/HSPA1B/INSR	22
GO:0043367	CD4-positive, alpha-beta T cell differentiation	13/580	107/18805	0.121495327102804	3.93917176925556	5.43906975069071	2.54838441550858e-05	0.0051045247835861	0.00450778295924057	IL6ST/BRD2/BCL6/JUNB/SOCS3/SOCS1/MYB/LEF1/ZFPM1/FOXP1/LGALS1/NFKBIZ/PIK3R1	13
GO:0097192	extrinsic apoptotic signaling pathway in absence of ligand	10/580	66/18805	0.151515151515152	4.91248693834901	5.68011348080669	3.21311773808506e-05	0.00616784725806578	0.00544679827092051	PRDX2/KLF4/MCL1/BAG3/HSPA1A/WWOX/RIPK1/TNF/HSPA1B/ERBB3	10
GO:0048754	branching morphogenesis of an epithelial tube	16/580	159/18805	0.10062893081761	3.26263283452613	5.11122685452428	3.3902028968043e-05	0.00624746589823097	0.00551710913522047	PGR/MYC/ESR1/MED1/LEF1/MSX2/SEMA3E/GPC3/NFATC4/HOXB7/NRARP/YAP1/TNF/EXT1/NPNT/AREG	16
GO:0038034	signal transduction in absence of ligand	10/580	68/18805	0.147058823529412	4.76800202839757	5.55291346255118	4.19012186842334e-05	0.00714972909022906	0.00631389371636647	PRDX2/KLF4/MCL1/BAG3/HSPA1A/WWOX/RIPK1/TNF/HSPA1B/ERBB3	10
GO:0002292	T cell differentiation involved in immune response	12/580	97/18805	0.123711340206186	4.01102026306434	5.30384976900772	4.32886817090366e-05	0.00714972909022906	0.00631389371636647	IL6ST/BRD2/BCL6/JUNB/SOCS3/MYB/LEF1/ZFPM1/FOXP1/LGALS1/NFKBIZ/PIK3R1	12
GO:0042176	regulation of protein catabolic process	27/580	375/18805	0.072	2.33441379310345	4.65638453515461	4.34539645162608e-05	0.00714972909022906	0.00631389371636647	OAZ1/NDUFA13/TSPAN15/SUMO2/FBXL20/ATP13A2/IER3/SF3B3/PLK2/CSNK2B/HSPA1A/CLU/TIPARP/NSF/FAF1/ZFAND2A/TIMP3/GCLC/GPC3/RHBDD1/F8A1/GNA12/TAF9/PSMC1/TNF/USP8/HSPA1B	27
GO:0006986	response to unfolded protein	15/580	146/18805	0.102739726027397	3.33106991025035	5.04420691965578	4.65581804110227e-05	0.00717889198059568	0.00633964733414879	HSPE1/BAG3/HSPB8/PPP1R15A/AGR2/AMFR/PPP1R15B/RNF7/HSPA1A/TMBIM4/HSPA2/RHBDD1/EIF2AK3/COPS5/PIK3R1	15
GO:0006091	generation of precursor metabolites and energy	32/580	484/18805	0.0661157024793388	2.14363066400684	4.54714951535405	4.67477229038138e-05	0.00717889198059568	0.00633964733414879	COX6A1/ATP5MF/UQCR11/COX8A/IL6ST/ATP5MG/NDUFC2/NDUFA11/NDUFA13/OGDH/ATP5PO/MTFR1/IER3/UQCRHL/EIF6/SDHA/DNAJC15/BLOC1S1/NNT/PPP2CA/IRS1/NDUFB8/SLC25A25/NFATC4/PPP1CB/IMMP2L/FOXK2/TNF/ETFB/ENO2/INSR/AGL	32
GO:0035966	response to topologically incorrect protein	16/580	164/18805	0.0975609756097561	3.16316232127839	4.96342861297649	4.94928070313282e-05	0.00724751789927255	0.00640025057536892	HSPE1/BAG3/HSPB8/PPP1R15A/AGR2/AMFR/PPP1R15B/RNF7/HSPA1A/CLU/TMBIM4/HSPA2/RHBDD1/EIF2AK3/COPS5/PIK3R1	16
GO:0009952	anterior/posterior pattern specification	19/580	219/18805	0.0867579908675799	2.81290347976697	4.81403366630687	5.16047637187265e-05	0.00724751789927255	0.00640025057536892	FRS2/GRSF1/PCGF2/EPB41L5/MESP1/ETS2/BASP1/HES6/LEF1/HOXB3/MSX2/LDB1/GPC3/HIPK1/TDRKH/KAT2A/HOXB7/NRARP/HOXC9	19
GO:0009141	nucleoside triphosphate metabolic process	22/580	277/18805	0.0794223826714801	2.57506535540894	4.71117831240498	5.23191742833561e-05	0.00724751789927255	0.00640025057536892	ATP5MF/ATP5MG/NDUFC2/NDUFA11/NDUFA13/OGDH/ATP5PO/NME1/IER3/EIF6/CTPS2/HSPA1A/SDHA/UCK2/PPP2CA/NDUFB8/SLC25A25/BLOC1S6/FOXK2/ENO2/HSPA1B/INSR	22
GO:0009060	aerobic respiration	18/580	201/18805	0.0895522388059701	2.90349974266598	4.8400855196027	5.34872169688011e-05	0.00724751789927255	0.00640025057536892	COX6A1/ATP5MF/UQCR11/COX8A/ATP5MG/NDUFC2/NDUFA11/NDUFA13/OGDH/ATP5PO/MTFR1/UQCRHL/SDHA/DNAJC15/BLOC1S1/NNT/NDUFB8/TNF	18
GO:0007369	gastrulation	18/580	202/18805	0.0891089108910891	2.88912598156367	4.81560062608154	5.70730307790773e-05	0.00751244150854883	0.00663420342740252	TXNRD1/FRS2/KLF4/UGDH/DUSP5/SNAI1/EPB41L5/MESP1/EXOC4/ETS2/LEF1/LDB1/GPC3/DUSP2/POFUT2/EXT1/LEO1/DUSP4	18
GO:0035710	CD4-positive, alpha-beta T cell activation	14/580	134/18805	0.104477611940299	3.38741636644364	4.94768595725807	6.88769818075732e-05	0.00846893647780213	0.00747887984798995	IL6ST/CEBPB/BRD2/BCL6/JUNB/SOCS3/SOCS1/MYB/LEF1/ZFPM1/FOXP1/LGALS1/NFKBIZ/PIK3R1	14
GO:2001237	negative regulation of extrinsic apoptotic signaling pathway	12/580	102/18805	0.117647058823529	3.81440162271805	5.08435505559732	7.13527626694227e-05	0.00846893647780213	0.00747887984798995	PRDX2/KLF4/MCL1/PEA15/HSPA1A/RIPK1/GCLC/RAF1/YAP1/TNF/HTT/HSPA1B	12
GO:0035967	cellular response to topologically incorrect protein	13/580	118/18805	0.110169491525424	3.57196084161309	4.9996650793308	7.18852380392359e-05	0.00846893647780213	0.00747887984798995	BAG3/HSPB8/PPP1R15A/AGR2/AMFR/PPP1R15B/RNF7/HSPA1A/TMBIM4/RHBDD1/EIF2AK3/COPS5/PIK3R1	13
GO:2001239	regulation of extrinsic apoptotic signaling pathway in absence of ligand	8/580	46/18805	0.173913043478261	5.63868065967016	5.61919235637286	7.23644737414065e-05	0.00846893647780213	0.00747887984798995	PRDX2/KLF4/MCL1/HSPA1A/WWOX/RIPK1/TNF/HSPA1B	8
GO:0030217	T cell differentiation	24/580	324/18805	0.0740740740740741	2.40166028097063	4.54002127477299	7.35586551745451e-05	0.00846893647780213	0.00747887984798995	AMBRA1/RPL22/IL6ST/PRDX2/BRD2/BCL6/JUNB/PREX1/SOCS3/SOCS1/MYB/MAFB/CYLD/LEF1/ZFPM1/RHOH/FOXP1/LGALS1/SMARCC2/KAT2A/NRARP/NFKBIZ/EGR3/PIK3R1	24
GO:0009948	anterior/posterior axis specification	9/580	59/18805	0.152542372881356	4.9457919345412	5.41515921019268	7.53693066181652e-05	0.00846893647780213	0.00747887984798995	FRS2/EPB41L5/MESP1/ETS2/BASP1/LDB1/GPC3/TDRKH/NRARP	9
GO:0010038	response to metal ion	25/580	347/18805	0.0720461095100865	2.33590877471927	4.4807897745498	8.18681241874325e-05	0.00898015352694052	0.00793033333294303	CALM2/PDCD6/JUND/TFF1/MT1X/FOSB/JUNB/ATP13A2/SLC30A1/ABAT/S100A8/NEK7/STK39/KCNC2/IMPA2/PPP2CA/PAM/GCLC/ENDOG/NFATC4/MT1G/EIF2AK3/MT2A/PPP3CA/SLC12A2	25
GO:0046632	alpha-beta T cell differentiation	14/580	138/18805	0.101449275362319	3.2892303848076	4.81500930399776	9.48889490662025e-05	0.00997312951110007	0.00880722597429581	RPL22/IL6ST/BRD2/BCL6/JUNB/SOCS3/SOCS1/MYB/LEF1/ZFPM1/FOXP1/LGALS1/NFKBIZ/PIK3R1	14
GO:1901099	negative regulation of signal transduction in absence of ligand	7/580	36/18805	0.194444444444444	6.30435823754789	5.68288515970639	9.8138834848493e-05	0.00997312951110007	0.00880722597429581	PRDX2/KLF4/MCL1/HSPA1A/RIPK1/TNF/HSPA1B	7
GO:2001240	negative regulation of extrinsic apoptotic signaling pathway in absence of ligand	7/580	36/18805	0.194444444444444	6.30435823754789	5.68288515970639	9.8138834848493e-05	0.00997312951110007	0.00880722597429581	PRDX2/KLF4/MCL1/HSPA1A/RIPK1/TNF/HSPA1B	7
GO:0046034	ATP metabolic process	19/580	230/18805	0.0826086956521739	2.67837331334333	4.56870820998277	9.95797606925555e-05	0.00997312951110007	0.00880722597429581	ATP5MF/ATP5MG/NDUFC2/NDUFA11/NDUFA13/OGDH/ATP5PO/IER3/EIF6/HSPA1A/SDHA/PPP2CA/NDUFB8/SLC25A25/BLOC1S6/FOXK2/ENO2/HSPA1B/INSR	19
GO:0002573	myeloid leukocyte differentiation	20/580	250/18805	0.08	2.59379310344828	4.52560679474338	0.000102573021120158	0.00997850843169381	0.00881197607496523	CEBPB/MYC/MED1/KLF10/JUNB/ITGB6/SOCS1/MAFB/LTF/LEF1/ZFPM1/RIPK1/FOXP1/GPC3/MT1G/TNF/FARP2/PPP3CA/DHRS7B/PIK3R1	20
GO:0008630	intrinsic apoptotic signaling pathway in response to DNA damage	12/580	106/18805	0.113207547169811	3.6704619388419	4.91853180312587	0.000103965358090146	0.00997850843169381	0.00881197607496523	RPL26/MCL1/SNAI1/PYCARD/IER3/CLU/HIPK1/NFATC4/TAF9/TNF/MUC1/PIK3R1	12
GO:0045669	positive regulation of osteoblast differentiation	10/580	77/18805	0.12987012987013	4.21070309001343	5.0362253855736	0.000123352803263732	0.011597680910939	0.0102418600346794	IL6ST/CEBPB/JUND/CEBPD/LTF/MSX2/YAP1/PPP3CA/BMPR1B/NPNT	10
GO:0009205	purine ribonucleoside triphosphate metabolic process	20/580	254/18805	0.078740157480315	2.5529459679609	4.44523669365585	0.000127308723354803	0.0117302257699116	0.0103589098056066	ATP5MF/ATP5MG/NDUFC2/NDUFA11/NDUFA13/OGDH/ATP5PO/NME1/IER3/EIF6/HSPA1A/SDHA/PPP2CA/NDUFB8/SLC25A25/BLOC1S6/FOXK2/ENO2/HSPA1B/INSR	20
GO:0060562	epithelial tube morphogenesis	24/580	337/18805	0.0712166172106825	2.3090146321498	4.32568477679054	0.00013484665611148	0.0121811479354037	0.0107571171490376	PGR/SPINT2/MYC/ESR1/MED1/BRD2/ADM/MESP1/CSNK2B/CXCR4/LEF1/FOXP1/MSX2/SEMA3E/GPC3/NFATC4/KAT2A/HOXB7/NRARP/YAP1/TNF/EXT1/NPNT/AREG	24
GO:0048545	response to steroid hormone	24/580	338/18805	0.0710059171597633	2.30218322791267	4.30960654829927	0.000141053689367111	0.0124968143637362	0.0110358807571637	PGR/JUND/IGFBP2/ESR1/ZFP36/MED1/FOSB/JUNB/IGF1R/ADM/SMYD3/HSPA1A/STK39/SCGB2A2/FOXP1/ZDHHC7/YAP1/TNF/USP8/HSPA1B/AREG/SCGB2A1/PMEPA1/AGL	24
GO:0140467	integrated stress response signaling	8/580	51/18805	0.156862745098039	5.08586883029074	5.21228197247177	0.000154253178062524	0.0134083847421518	0.0118408844729226	CEBPB/CEBPD/PPP1R15A/AGR2/JUNB/PPP1R15B/MAFB/EIF2AK3	8
GO:0009144	purine nucleoside triphosphate metabolic process	20/580	261/18805	0.0766283524904215	2.48447615272823	4.30821252705105	0.000183456066628368	0.0156515203510535	0.0138217874759969	ATP5MF/ATP5MG/NDUFC2/NDUFA11/NDUFA13/OGDH/ATP5PO/NME1/IER3/EIF6/HSPA1A/SDHA/PPP2CA/NDUFB8/SLC25A25/BLOC1S6/FOXK2/ENO2/HSPA1B/INSR	20
GO:0043588	skin development	23/580	324/18805	0.0709876543209877	2.30159110259685	4.21589409150759	0.00019368054032773	0.0162233863507246	0.0143267997773527	KLF4/ZFP36/JUP/MED1/S100A7/IGFBP5/SNAI1/KRT7/ITGB6/ARRDC3/OVOL1/TFAP2B/TRPC4AP/MAFB/RIPK4/MSX2/LDB1/CSTA/YAP1/NFKBIZ/TNF/EXT1/PPP3CA	23
GO:2001234	negative regulation of apoptotic signaling pathway	19/580	243/18805	0.0781893004115226	2.53508585213566	4.29663806135405	0.000203913199852021	0.016775501994969	0.014814370628347	PRDX2/KLF4/MCL1/PCGF2/SNAI1/IER3/PEA15/HSPA1A/CLU/RIPK1/GCLC/RAF1/TAF9/YAP1/TNF/HTT/RTKN2/HSPA1B/MUC1	19
GO:0001503	ossification	29/580	458/18805	0.0633187772925764	2.05294759825327	4.06969925231123	0.000219677228478203	0.0177553156420891	0.0156796396688505	HSPE1/IL6ST/CEBPB/JUND/IGFBP2/CEBPD/KLF10/IGFBP5/SNAI1/JUNB/ALYREF/LTF/TPM4/FHL2/LEF1/WWOX/TUFT1/MSX2/GPC3/BCAP29/YAP1/TNF/ECM1/EIF2AK3/EXT1/PPP3CA/BMPR1B/NPNT/AREG	29
GO:0001704	formation of primary germ layer	13/580	132/18805	0.0984848484848485	3.19311650992685	4.51073144013922	0.000224957390152426	0.0178685982143487	0.0157796790007101	TXNRD1/KLF4/DUSP5/SNAI1/EPB41L5/MESP1/EXOC4/ETS2/LEF1/DUSP2/POFUT2/LEO1/DUSP4	13
GO:0009259	ribonucleotide metabolic process	25/580	371/18805	0.0673854447439353	2.18479877312018	4.11175385783484	0.000232153796156284	0.0181276701507119	0.0160084642666198	ATP5MF/ATP5MG/NDUFC2/NDUFA11/NDUFA13/OGDH/ATP5PO/NME1/IER3/EIF6/CTPS2/HSPA1A/SDHA/UCK2/NUDT4/PPP2CA/NDUFB8/SLC25A25/BLOC1S6/FOXK2/DCK/PDE7A/ENO2/HSPA1B/INSR	25
GO:0006119	oxidative phosphorylation	14/580	151/18805	0.0927152317880795	3.00605160995661	4.4151955054542	0.000246784283713879	0.0189489199178306	0.0167337062553358	COX6A1/ATP5MF/UQCR11/COX8A/ATP5MG/NDUFC2/NDUFA11/NDUFA13/ATP5PO/UQCRHL/SDHA/DNAJC15/NDUFB8/TNF	14
GO:2001242	regulation of intrinsic apoptotic signaling pathway	16/580	189/18805	0.0846560846560847	2.74475460682357	4.30058385513428	0.000261879928971377	0.0197783743077235	0.0174661937096527	RPL26/PMAIP1/MYC/MCL1/SNAI1/PYCARD/BCLAF1/HSPA1A/S100A8/CLU/CYLD/S100A9/TAF9/EIF2AK3/RTKN2/MUC1	16
GO:0051955	regulation of amino acid transport	7/580	42/18805	0.166666666666667	5.40373563218391	5.09682937048413	0.000270268793261412	0.0200827150089568	0.0177349556189364	ARL6IP1/SLC38A2/ABAT/RGS2/SLC43A1/TNF/SLC12A2	7
GO:0007005	mitochondrion organization	28/580	445/18805	0.0629213483146067	2.04006199147617	3.96103100811822	0.000310678807441099	0.0223769621742393	0.019760995008382	CHCHD3/PMAIP1/JTB/MCL1/NDUFC2/NDUFA11/NDUFA13/PYCARD/MTFR1/ATP13A2/IER3/COX14/HSPA1A/CLU/TYMP/HIGD2A/TNFSF10/HIGD1A/DDHD2/GCLC/NDUFB8/PET100/ENDOG/IMMP2L/GDAP1/TMEM11/BIK/CNP	28
GO:0008625	extrinsic apoptotic signaling pathway via death domain receptors	10/580	86/18805	0.116279069767442	3.77004811547715	4.59304357649166	0.000310858601942981	0.0223769621742393	0.019760995008382	PMAIP1/BAG3/PEA15/TNFSF10/FAF1/BEX3/RAF1/TNF/BMPR1B/PIK3R1	10
GO:0019693	ribose phosphate metabolic process	25/580	379/18805	0.0659630606860158	2.1386816486216	3.99495362838082	0.000320338191613018	0.0225839282132621	0.0199437657898754	ATP5MF/ATP5MG/NDUFC2/NDUFA11/NDUFA13/OGDH/ATP5PO/NME1/IER3/EIF6/CTPS2/HSPA1A/SDHA/UCK2/NUDT4/PPP2CA/NDUFB8/SLC25A25/BLOC1S6/FOXK2/DCK/PDE7A/ENO2/HSPA1B/INSR	25
GO:0045444	fat cell differentiation	19/580	252/18805	0.0753968253968254	2.44454707170224	4.11841631700069	0.000323537934029802	0.0225839282132621	0.0199437657898754	CEBPB/KLF4/ZFP36/MED1/CEBPD/ADIRF/SOCS1/TFAP2B/MAFB/STEAP4/RGS2/PIM1/MSX2/MEX3C/YAP1/TNF/FTO/DHRS7B/ARID5B	19
GO:0001892	embryonic placenta development	10/580	87/18805	0.114942528735632	3.72671422909235	4.54752273386961	0.000341715199047717	0.0234967451046691	0.0207498702956705	CEBPB/SPINT2/MED1/SNAI1/JUNB/SOCS3/ADM/CDKN1C/LEF1/KRT19	10
GO:0043124	negative regulation of canonical NF-kappaB signal transduction	9/580	72/18805	0.125	4.05280172413793	4.62984582878713	0.000358033854302993	0.0239483553191769	0.0211486852521035	KLF4/ESR1/PYDC1/PYCARD/CYLD/RIPK1/RHOH/TSPAN6/TGFBR3	9
GO:0045732	positive regulation of protein catabolic process	17/580	214/18805	0.0794392523364486	2.5756123106671	4.13533051560488	0.000360761417894729	0.0239483553191769	0.0211486852521035	OAZ1/NDUFA13/SUMO2/IER3/PLK2/HSPA1A/CLU/TIPARP/NSF/FAF1/ZFAND2A/GCLC/GPC3/RHBDD1/PSMC1/TNF/HSPA1B	17
GO:1902043	positive regulation of extrinsic apoptotic signaling pathway via death domain receptors	4/580	12/18805	0.333333333333333	10.8074712643678	6.06254478772169	0.000363877766950811	0.0239483553191769	0.0211486852521035	PMAIP1/PEA15/FAF1/BMPR1B	4
GO:0002544	chronic inflammatory response	5/580	21/18805	0.238095238095238	7.7196223316913	5.49624168832035	0.000370357245279103	0.0240314905493074	0.0212221016012414	CEBPB/S100A8/S100A9/NFKBIZ/TNF	5
GO:0007249	canonical NF-kappaB signal transduction	22/580	318/18805	0.0691823899371069	2.24306007373672	3.98820805545542	0.000378142345073068	0.0241958581076614	0.0213672538553715	TRAF4/KLF4/ESR1/FKBP1A/PYDC1/PYCARD/SLC35B2/PLK2/CYLD/LTF/TNFSF10/NUP62/RIPK1/RHOH/TMEM101/LGALS1/PELI1/TSPAN6/TNF/ECM1/TGFBR3/MYO18A	22
GO:0099022	vesicle tethering	6/580	32/18805	0.1875	6.0792025862069	5.12990158963419	0.000383538553762128	0.0242049605093442	0.0213752921455029	STARD3/EXOC2/EXOC4/TRAPPC10/TRAPPC9/TRAPPC1	6
GO:0007498	mesoderm development	13/580	140/18805	0.0928571428571429	3.01065270935961	4.25983162740173	0.00040075803130369	0.0249498952731905	0.0220331406968529	TXNRD1/KLF4/SNAI1/EPB41L5/OVOL1/MESP1/EXOC4/ETS2/LEF1/PPP2CA/POFUT2/YAP1/EXT1	13
GO:0043122	regulation of canonical NF-kappaB signal transduction	21/580	300/18805	0.07	2.26956896551724	3.95437388895713	0.000436515509872837	0.0268136927197888	0.0236790518688914	TRAF4/KLF4/ESR1/FKBP1A/PYDC1/PYCARD/SLC35B2/PLK2/CYLD/LTF/TNFSF10/NUP62/RIPK1/RHOH/TMEM101/LGALS1/PELI1/TSPAN6/TNF/ECM1/TGFBR3	21
GO:0002063	chondrocyte development	6/580	33/18805	0.181818181818182	5.89498432601881	5.02063156533627	0.000456676767165312	0.0276830245569815	0.0244467549181985	MSX2/MEX3C/ECM1/EIF2AK3/EXT1/BMPR1B	6
GO:0045646	regulation of erythrocyte differentiation	7/580	46/18805	0.152173913043478	4.93384557721139	4.76537115193208	0.000482076747989291	0.0288432152985281	0.025471314162387	ZFP36/MED1/HSPA1A/MAFB/ZFPM1/LDB1/HSPA1B	7
GO:0031650	regulation of heat generation	4/580	13/18805	0.307692307692308	9.97612732095491	5.7753662149608	0.000512824544922406	0.0302895215186862	0.0267485407034426	ARRDC3/ABAT/PTGER3/TNF	4
GO:0062208	positive regulation of pattern recognition receptor signaling pathway	9/580	76/18805	0.118421052631579	3.83949637023593	4.42482570819481	0.000537483676473806	0.0313441430065168	0.0276798722128083	HSPA1A/NEK7/ZDHHC5/LTF/PPP2CA/PELI1/ZCCHC3/CYBA/HSPA1B	9
GO:0060444	branching involved in mammary gland duct morphogenesis	5/580	23/18805	0.217391304347826	7.04835082458771	5.1776813984659	0.000581968923709306	0.0335141353941096	0.0295961827649535	PGR/ESR1/MED1/MSX2/AREG	5
GO:0031334	positive regulation of protein-containing complex assembly	16/580	205/18805	0.0780487804878049	2.53052985702271	3.93067932176439	0.00064496687706336	0.0366834864522333	0.0323950224801805	AMBRA1/BAIAP2L1/SPIDR/PYCARD/HSPA1A/CLU/NEK7/ZDHHC5/FAF1/SKAP1/PPP2CA/PFN2/MAP1B/TNF/BIK/HSPA1B	16
GO:0002761	regulation of myeloid leukocyte differentiation	12/580	130/18805	0.0923076923076923	2.99283819628647	4.06741755849675	0.000698491695100251	0.0388830973322572	0.0343374889902492	CEBPB/MYC/KLF10/MAFB/LTF/LEF1/ZFPM1/RIPK1/FOXP1/TNF/PPP3CA/PIK3R1	12
GO:0051956	negative regulation of amino acid transport	4/580	14/18805	0.285714285714286	9.26354679802956	5.51773593043175	0.000700520312259029	0.0388830973322572	0.0343374889902492	ABAT/RGS2/SLC43A1/TNF	4
GO:0030316	osteoclast differentiation	11/580	113/18805	0.0973451327433628	3.15616417454989	4.1010825471448	0.000740858483777758	0.0401548485198696	0.0354605667643736	CEBPB/KLF10/JUNB/MAFB/LTF/FOXP1/GPC3/TNF/FARP2/PPP3CA/PIK3R1	11
GO:0043369	CD4-positive or CD8-positive, alpha-beta T cell lineage commitment	6/580	36/18805	0.166666666666667	5.40373563218391	4.71799278077742	0.000742629113732263	0.0401548485198696	0.0354605667643736	IL6ST/BRD2/SOCS3/CYLD/ZFPM1/LGALS1	6
GO:0043434	response to peptide hormone	29/580	494/18805	0.0587044534412955	1.90334008097166	3.62964435022715	0.00074958041517447	0.0401548485198696	0.0354605667643736	GRB14/TFF1/IGFBP5/RAB13/IGF1R/GDF15/SOCS3/ADM/SOCS1/CTSD/EIF6/LEPROT/TNFSF10/VAMP2/PIP4K2B/ZDHHC7/GCLC/IRS1/SOCS7/CA2/RAF1/MAP1B/TGFBR3/BCAR3/NUCKS1/PPP3CA/AREG/INSR/PIK3R1	29
GO:0006903	vesicle targeting	8/580	65/18805	0.123076923076923	3.99045092838196	4.3083791437772	0.000838419336509924	0.0438931577647866	0.0387618509044361	STARD3/PDCD6/YKT6/EXOC2/EXOC4/TRAPPC10/TRAPPC9/TRAPPC1	8
GO:2001244	positive regulation of intrinsic apoptotic signaling pathway	8/580	65/18805	0.123076923076923	3.99045092838196	4.3083791437772	0.000838419336509924	0.0438931577647866	0.0387618509044361	RPL26/PMAIP1/MYC/MCL1/BCLAF1/S100A8/CLU/S100A9	8
GO:0042594	response to starvation	17/580	232/18805	0.0732758620689655	2.37578032104637	3.76146829628754	0.000901904524943899	0.0466862263642308	0.0412283972668027	AMBRA1/PMAIP1/ZFP36/HNRNPA1/SLC38A2/KLF10/IGF1R/MAP1LC3B2/ADM/PEX2/DNAJC15/BCAS3/SEH1L/WDR24/FOXK2/MFSD2A/EIF2AK3	17
GO:0045580	regulation of T cell differentiation	15/580	192/18805	0.078125	2.53300107758621	3.80881812683161	0.000931762979022711	0.0476959116039737	0.0421200457768746	AMBRA1/PRDX2/BRD2/BCL6/JUNB/SOCS1/CYLD/LEF1/RHOH/LGALS1/SMARCC2/KAT2A/NRARP/NFKBIZ/EGR3	15
GO:0030098	lymphocyte differentiation	26/580	432/18805	0.0601851851851852	1.95134897828863	3.56859318307055	0.00096793474201424	0.0490030258951605	0.0432743525492775	AMBRA1/RPL22/IL6ST/PRDX2/BRD2/BCL6/JUNB/PREX1/SOCS3/SOCS1/MYB/MAFB/CYLD/TPD52/LEF1/ZFPM1/RHOH/FOXP1/LGALS1/SMARCC2/KAT2A/PGLYRP2/NRARP/NFKBIZ/EGR3/PIK3R1	26
GO:0009201	ribonucleoside triphosphate biosynthetic process	11/580	117/18805	0.094017094017094	3.04826112584733	3.96462568521747	0.000990240892443016	0.0490541913062901	0.043319536494536	ATP5MF/ATP5MG/NDUFC2/NDUFA11/NDUFA13/ATP5PO/NME1/CTPS2/SDHA/UCK2/NDUFB8	11
GO:0010821	regulation of mitochondrion organization	11/580	117/18805	0.094017094017094	3.04826112584733	3.96462568521747	0.000990240892443016	0.0490541913062901	0.043319536494536	PMAIP1/PYCARD/ATP13A2/IER3/HSPA1A/CLU/TNFSF10/DDHD2/GCLC/ENDOG/BIK	11
GO:0051028	mRNA transport	12/580	136/18805	0.0882352941176471	2.86080121703854	3.8852078478387	0.00104091561859351	0.0510159388814924	0.0450519469861579	ZFP36/HNRNPA1/G3BP2/NXF1/ALYREF/NUP62/NUP98/RBM15B/SEH1L/GLE1/FXR1/CASC3	12
GO:0006368	transcription elongation by RNA polymerase II	11/580	118/18805	0.0932203389830508	3.02242840444185	3.93142	0.00106237591450722	0.0515196404014185	0.0454967635409462	CDK12/HEXIM1/MED1/ELP2/CDK9/MED14/SUPT4H1/LDB1/LARP7/EPOP/LEO1	11
GO:0051091	positive regulation of DNA-binding transcription factor activity	15/580	195/18805	0.0769230769230769	2.49403183023873	3.74118615816034	0.00109046660827748	0.0523310381701496	0.0462133052740403	ESR1/JUP/PYCARD/HSPA1A/S100A8/CLU/LTF/S100A9/RIPK1/RIPK4/TNF/RTKN2/COPS5/HSPA1B/ARID5B	15
GO:0045667	regulation of osteoblast differentiation	13/580	156/18805	0.0833333333333333	2.70186781609195	3.80772608974228	0.00111301973124489	0.0528627000190226	0.0466828134700107	IL6ST/CEBPB/JUND/CEBPD/IGFBP5/LTF/MSX2/YAP1/TNF/PPP3CA/BMPR1B/NPNT/AREG	13
GO:0042776	proton motive force-driven mitochondrial ATP synthesis	8/580	68/18805	0.117647058823529	3.81440162271805	4.14759029905916	0.00113283475864414	0.0532547931946281	0.0470290691961289	ATP5MF/ATP5MG/NDUFC2/NDUFA11/NDUFA13/ATP5PO/SDHA/NDUFB8	8
GO:0010043	response to zinc ion	7/580	53/18805	0.132075471698113	4.28220559531555	4.26859811913391	0.00115298337615907	0.0536544890299478	0.0473820387969676	MT1X/ATP13A2/SLC30A1/S100A8/PAM/MT1G/MT2A	7
GO:0051092	positive regulation of NF-kappaB transcription factor activity	11/580	120/18805	0.0916666666666667	2.97205459770115	3.86605791816715	0.00121967482906537	0.0556340785891501	0.0491302054646968	PYCARD/HSPA1A/S100A8/CLU/LTF/S100A9/RIPK1/RIPK4/TNF/RTKN2/HSPA1B	11
GO:1902106	negative regulation of leukocyte differentiation	11/580	120/18805	0.0916666666666667	2.97205459770115	3.86605791816715	0.00121967482906537	0.0556340785891501	0.0491302054646968	PRDX2/MYC/BCL6/SOCS1/MAFB/LTF/ZFPM1/LGALS1/PGLYRP2/NRARP/PIK3R1	11
GO:0060669	embryonic placenta morphogenesis	5/580	27/18805	0.185185185185185	6.00415070242656	4.64186969015611	0.00126115386349662	0.0564090859138732	0.0498146109597797	SPINT2/SOCS3/ADM/CDKN1C/LEF1	5
GO:1901798	positive regulation of signal transduction by p53 class mediator	5/580	27/18805	0.185185185185185	6.00415070242656	4.64186969015611	0.00126115386349662	0.0564090859138732	0.0498146109597797	RPL26/PMAIP1/MYC/HEXIM1/EEF1E1	5
GO:0071356	cellular response to tumor necrosis factor	16/580	219/18805	0.0730593607305936	2.36876082506692	3.63464506882689	0.00130189025702939	0.0572487954780924	0.0505561547125831	ZFP36/PYDC1/PYCARD/HSPA1A/CYLD/KLF2/PRPF8/RIPK1/FOXP1/HIPK1/KAT2A/CXCL8/TNF/EXT1/NPNT/HSPA1B	16
GO:0072332	intrinsic apoptotic signaling pathway by p53 class mediator	9/580	86/18805	0.104651162790698	3.39304330392943	3.96792825148677	0.00132242539914709	0.0572487954780924	0.0505561547125831	RPL26/PMAIP1/MYC/PYCARD/WWOX/HIPK1/PPP1R13B/TAF9/MUC1	9
GO:0002286	T cell activation involved in immune response	12/580	140/18805	0.0857142857142857	2.77906403940887	3.76918063819222	0.00133897846831535	0.0572487954780924	0.0505561547125831	IL6ST/BRD2/BCL6/JUNB/SOCS3/MYB/LEF1/ZFPM1/FOXP1/LGALS1/NFKBIZ/PIK3R1	12
GO:0050727	regulation of inflammatory response	26/580	442/18805	0.0588235294117647	1.90720081135903	3.44308779649292	0.00134173694683935	0.0572487954780924	0.0505561547125831	IL6ST/CEBPB/KLF4/ESR1/ZFP36/DDT/PYCARD/BCL6/IER3/SOCS3/PLK2/PSMA1/S100A8/CYLD/ZDHHC5/STK39/S100A9/NLRP2/RIPK1/FOXP1/LGALS1/PTGER3/PGLYRP2/NFKBIZ/TNF/FXR1	26
GO:0009150	purine ribonucleotide metabolic process	22/580	350/18805	0.0628571428571429	2.0379802955665	3.4968053355385	0.00134205988965357	0.0572487954780924	0.0505561547125831	ATP5MF/ATP5MG/NDUFC2/NDUFA11/NDUFA13/OGDH/ATP5PO/NME1/IER3/EIF6/HSPA1A/SDHA/NUDT4/PPP2CA/NDUFB8/SLC25A25/BLOC1S6/FOXK2/PDE7A/ENO2/HSPA1B/INSR	22
GO:0034612	response to tumor necrosis factor	17/580	241/18805	0.0705394190871369	2.28705823436829	3.58737096217931	0.00136740837011813	0.0574268521875718	0.0507133957947208	ZFP36/PYDC1/PYCARD/HSPA1A/CYLD/KLF2/PRPF8/RIPK1/FOXP1/ENDOG/HIPK1/KAT2A/CXCL8/TNF/EXT1/NPNT/HSPA1B	17
GO:0010803	regulation of tumor necrosis factor-mediated signaling pathway	8/580	70/18805	0.114285714285714	3.70541871921182	4.04540504271467	0.00137116425887408	0.0574268521875718	0.0507133957947208	PYDC1/PYCARD/HSPA1A/CYLD/RIPK1/HIPK1/EXT1/HSPA1B	8
GO:0046631	alpha-beta T cell activation	15/580	201/18805	0.0746268656716418	2.41958311888832	3.60962	0.00147689107249979	0.0607503318839868	0.0536483458196586	RPL22/IL6ST/CEBPB/BRD2/BCL6/JUNB/SOCS3/SOCS1/MYB/LEF1/ZFPM1/FOXP1/LGALS1/NFKBIZ/PIK3R1	15
GO:0060759	regulation of response to cytokine stimulus	15/580	201/18805	0.0746268656716418	2.41958311888832	3.60962	0.00147689107249979	0.0607503318839868	0.0536483458196586	IL6ST/KLF4/MED1/PYDC1/PYCARD/HSPA1A/CXCR4/YTHDF3/CYLD/RIPK1/HIPK1/TAF9/ECM1/EXT1/HSPA1B	15
GO:0035265	organ growth	14/580	181/18805	0.0773480662983425	2.50781101162126	3.63626115173174	0.00149773133696929	0.0607655781357537	0.0536618097162642	ESR1/SORBS2/MESP1/BASP1/RGS2/FOXP1/PIM1/MSX2/IER3IP1/YAP1/ECM1/TGFBR3/EXT1/DUSP6	14
GO:0072539	T-helper 17 cell differentiation	6/580	41/18805	0.146341463414634	4.74474348191758	4.28209836439625	0.00150505615402463	0.0607655781357537	0.0536618097162642	IL6ST/BRD2/JUNB/SOCS3/LGALS1/NFKBIZ	6
GO:0010958	regulation of amino acid import across plasma membrane	4/580	17/18805	0.235294117647059	7.62880324543611	4.8778075667053	0.00154740738972923	0.0607655781357537	0.0536618097162642	ARL6IP1/RGS2/SLC43A1/TNF	4
GO:1903789	regulation of amino acid transmembrane transport	4/580	17/18805	0.235294117647059	7.62880324543611	4.8778075667053	0.00154740738972923	0.0607655781357537	0.0536618097162642	ARL6IP1/RGS2/SLC43A1/TNF	4
GO:0030968	endoplasmic reticulum unfolded protein response	9/580	88/18805	0.102272727272727	3.31592868338558	3.88466655955057	0.00155640074235271	0.0607655781357537	0.0536618097162642	PPP1R15A/AGR2/AMFR/PPP1R15B/RNF7/TMBIM4/EIF2AK3/COPS5/PIK3R1	9
GO:0034243	regulation of transcription elongation by RNA polymerase II	9/580	88/18805	0.102272727272727	3.31592868338558	3.88466655955057	0.00155640074235271	0.0607655781357537	0.0536618097162642	CDK12/HEXIM1/MED1/CDK9/MED14/SUPT4H1/LDB1/LARP7/LEO1	9
GO:0008585	female gonad development	10/580	106/18805	0.0943396226415094	3.05871828236825	3.79180515484006	0.0016170915658779	0.0622408572750111	0.0549646221123274	PGR/CEBPB/ESR1/TIPARP/ROBO2/IMMP2L/BMPR1B/NRIP1/INSR/ARID5B	10
GO:0006163	purine nucleotide metabolic process	26/580	448/18805	0.0580357142857143	1.88165794334975	3.36933060808315	0.00162120748274394	0.0622408572750111	0.0549646221123274	ATP5MF/ATP5MG/NDUFC2/NDUFA11/NDUFA13/OGDH/ATP5PO/NME1/IER3/EIF6/HSPA1A/SDHA/NUDT4/NNT/PPP2CA/NDUFB8/SLC25A25/BLOC1S6/FOXK2/FMO5/DCK/KYNU/PDE7A/ENO2/HSPA1B/INSR	26
GO:0009142	nucleoside triphosphate biosynthetic process	11/580	125/18805	0.088	2.8531724137931	3.70841002807413	0.00169818794548794	0.0634363896903173	0.0560203914302209	ATP5MF/ATP5MG/NDUFC2/NDUFA11/NDUFA13/ATP5PO/NME1/CTPS2/SDHA/UCK2/NDUFB8	11
GO:0051650	establishment of vesicle localization	15/580	204/18805	0.0735294117647059	2.38400101419878	3.54559148115479	0.00170954105792256	0.0634363896903173	0.0560203914302209	STARD3/PDCD6/YKT6/ATP13A2/EXOC2/MX1/EXOC4/TRAPPC10/BLOC1S1/F8A1/BLOC1S6/TRAPPC9/HTT/COPS5/TRAPPC1	15
GO:0000578	embryonic axis specification	6/580	42/18805	0.142857142857143	4.63177339901478	4.2033697917197	0.00171085404748517	0.0634363896903173	0.0560203914302209	FRS2/EPB41L5/MESP1/BASP1/TDRKH/NRARP	6
GO:0002360	T cell lineage commitment	6/580	42/18805	0.142857142857143	4.63177339901478	4.2033697917197	0.00171085404748517	0.0634363896903173	0.0560203914302209	IL6ST/BRD2/SOCS3/CYLD/ZFPM1/LGALS1	6
GO:0045619	regulation of lymphocyte differentiation	16/580	225/18805	0.0711111111111111	2.3055938697318	3.51464816228363	0.00172119572634896	0.0634363896903173	0.0560203914302209	AMBRA1/PRDX2/BRD2/BCL6/JUNB/SOCS1/CYLD/LEF1/RHOH/LGALS1/SMARCC2/KAT2A/PGLYRP2/NRARP/NFKBIZ/EGR3	16
GO:0008637	apoptotic mitochondrial changes	10/580	107/18805	0.0934579439252336	3.03013213019658	3.75685095194497	0.00173576657171407	0.0634656872689424	0.0560462639906006	PMAIP1/JTB/MCL1/PYCARD/IER3/HSPA1A/CLU/TNFSF10/GCLC/BIK	10
GO:0002295	T-helper cell lineage commitment	5/580	29/18805	0.172413793103448	5.59007134363853	4.4128813032476	0.00176336189378542	0.0634672519114801	0.0560476457194134	IL6ST/BRD2/SOCS3/ZFPM1/LGALS1	5
GO:0070841	inclusion body assembly	5/580	29/18805	0.172413793103448	5.59007134363853	4.4128813032476	0.00176336189378542	0.0634672519114801	0.0560476457194134	BAG3/HSPA1A/CLU/HSPA2/HSPA1B	5
GO:0050657	nucleic acid transport	13/580	165/18805	0.0787878787878788	2.55449320794148	3.57777641192234	0.00184938426640805	0.0655393331949374	0.0578774914143085	ZFP36/HNRNPA1/G3BP2/NXF1/ALYREF/NUP62/NUP98/RBM15B/SEH1L/GLE1/XPO5/FXR1/CASC3	13
GO:0050658	RNA transport	13/580	165/18805	0.0787878787878788	2.55449320794148	3.57777641192234	0.00184938426640805	0.0655393331949374	0.0578774914143085	ZFP36/HNRNPA1/G3BP2/NXF1/ALYREF/NUP62/NUP98/RBM15B/SEH1L/GLE1/XPO5/FXR1/CASC3	13
GO:1903707	negative regulation of hemopoiesis	11/580	127/18805	0.0866141732283465	2.80824056475699	3.64752462154978	0.00192813736847087	0.0672490366279739	0.0593873228535796	PRDX2/MYC/BCL6/SOCS1/MAFB/LTF/ZFPM1/LGALS1/PGLYRP2/NRARP/PIK3R1	11
GO:0030162	regulation of proteolysis	25/580	430/18805	0.0581395348837209	1.88502405773857	3.31192870905912	0.00192904946384573	0.0672490366279739	0.0593873228535796	EFNA1/TSPAN15/SUMO2/NEDD8/TRAF7/ATP13A2/CSTB/CSNK2B/HSPA1A/CLU/PSENEN/DNAJC1/ZFAND2A/TIMP3/PLAT/GCLC/CSTA/RHBDD1/F8A1/GNA12/TAF9/PSMC1/TNF/ECM1/HSPA1B	25
GO:0031649	heat generation	4/580	18/18805	0.222222222222222	7.20498084291188	4.69843615094782	0.00194141998513578	0.0672490366279739	0.0593873228535796	ARRDC3/ABAT/PTGER3/TNF	4
GO:0032786	positive regulation of DNA-templated transcription, elongation	7/580	58/18805	0.120689655172414	3.91304994054697	3.96370556805467	0.00197040148992123	0.0677435795825905	0.0598240515203894	CDK12/MED1/CDK9/MED14/SUPT4H1/LDB1/LEO1	7
GO:0043254	regulation of protein-containing complex assembly	25/580	431/18805	0.0580046403712297	1.88065045203616	3.29948144925019	0.00199019198149178	0.0679171441387602	0.059977325602072	AMBRA1/ARPC3/SPTAN1/BAIAP2L1/NAPA/SPIDR/ADD3/PYCARD/PREX1/HSPA1A/CLU/NEK7/ZDHHC5/CLDN7/DNAJC15/FAF1/SKAP1/PPP2CA/PFN2/RAF1/MAP1B/TNF/FARP2/BIK/HSPA1B	25
GO:0007159	leukocyte cell-cell adhesion	25/580	433/18805	0.0577367205542725	1.8719638448674	3.27468520036568	0.00211746170523334	0.0710359671427552	0.0627315442191514	AMBRA1/IL6ST/CEBPB/PRDX2/KLF4/IGFBP2/BRD2/PYCARD/BCL6/SOCS1/S100A8/CYLD/S100A9/LEF1/SKAP1/RHOH/LGALS1/SMARCC2/PELI1/NRARP/NFKBIZ/TNF/EGR3/EXT1/PPP3CA	25
GO:1905897	regulation of response to endoplasmic reticulum stress	9/580	92/18805	0.0978260869565217	3.17175787106447	3.72510877272448	0.00212377390717884	0.0710359671427552	0.0627315442191514	PMAIP1/PPP1R15A/AGR2/PPP1R15B/HSPA1A/CLU/EIF2AK3/COPS5/PIK3R1	9
GO:0046545	development of primary female sexual characteristics	10/580	110/18805	0.0909090909090909	2.9474921630094	3.65438816773307	0.00213466513913005	0.0710359671427552	0.0627315442191514	PGR/CEBPB/ESR1/TIPARP/ROBO2/IMMP2L/BMPR1B/NRIP1/INSR/ARID5B	10
GO:0071479	cellular response to ionizing radiation	8/580	75/18805	0.106666666666667	3.4583908045977	3.80555510842881	0.0021432601330243	0.0710359671427552	0.0627315442191514	RPL26/GADD45A/SPIDR/ITGB6/YAP1/TNF/NUCKS1/TSPYL5	8
GO:0051236	establishment of RNA localization	13/580	168/18805	0.0773809523809524	2.50887725779967	3.50449867877326	0.00216994740958117	0.0714067693995745	0.0630589980303098	ZFP36/HNRNPA1/G3BP2/NXF1/ALYREF/NUP62/NUP98/RBM15B/SEH1L/GLE1/XPO5/FXR1/CASC3	13
GO:0045429	positive regulation of nitric oxide biosynthetic process	6/580	44/18805	0.136363636363636	4.42123824451411	4.05309715579401	0.00218573540409214	0.0714161915365426	0.0630673186772388	KLF4/ESR1/CLU/KLF2/TNF/INSR	6
GO:0002181	cytoplasmic translation	13/580	169/18805	0.0769230769230769	2.49403183023873	3.48042437176598	0.0022864446267496	0.0741806365875732	0.0655085877122846	RPS26/RPL21/RPL22/RPL26/RPL7/RPL9/RPS10/EIF2D/RBM24/RPL18A/RPS28/RPL19/RPS3A	13
GO:0001707	mesoderm formation	8/580	76/18805	0.105263157894737	3.41288566243194	3.76003245574721	0.00233217501026554	0.0746134046687038	0.0658907632651778	TXNRD1/KLF4/SNAI1/EPB41L5/MESP1/EXOC4/LEF1/POFUT2	8
GO:0061077	chaperone-mediated protein folding	8/580	76/18805	0.105263157894737	3.41288566243194	3.76003245574721	0.00233217501026554	0.0746134046687038	0.0658907632651778	HSPE1/PDIA4/FKBP2/FKBP5/HSPA1A/CLU/HSPA2/HSPA1B	8
GO:0008209	androgen metabolic process	5/580	31/18805	0.161290322580645	5.22942157953281	4.20425226213118	0.00239830156277761	0.0752081412796016	0.0664159725008078	ESR1/MED1/ADM/TIPARP/SRD5A3	5
GO:0048339	paraxial mesoderm development	4/580	19/18805	0.210526315789474	6.82577132486388	4.53229766027353	0.00239973882528792	0.0752081412796016	0.0664159725008078	EPB41L5/EXOC4/LEF1/YAP1	4
GO:0090083	regulation of inclusion body assembly	4/580	19/18805	0.210526315789474	6.82577132486388	4.53229766027353	0.00239973882528792	0.0752081412796016	0.0664159725008078	HSPA1A/CLU/HSPA2/HSPA1B	4
GO:1904407	positive regulation of nitric oxide metabolic process	6/580	45/18805	0.133333333333333	4.32298850574713	3.98129197469229	0.00245742866195324	0.0764828758397647	0.0675416848778611	KLF4/ESR1/CLU/KLF2/TNF/INSR	6
GO:0062207	regulation of pattern recognition receptor signaling pathway	14/580	191/18805	0.0732984293193717	2.37651200577722	3.41100363319364	0.00247361591059799	0.0764828758397647	0.0675416848778611	ESR1/HSPA1A/S100A8/NEK7/ZDHHC5/LTF/S100A9/PPP2CA/PELI1/TSPAN6/ZCCHC3/CYBA/HSPA1B/PIK3R1	14
GO:0015986	proton motive force-driven ATP synthesis	8/580	77/18805	0.103896103896104	3.36856247201075	3.71526550865455	0.00253390021544703	0.0778245219504297	0.0687264865452825	ATP5MF/ATP5MG/NDUFC2/NDUFA11/NDUFA13/ATP5PO/SDHA/NDUFB8	8
GO:0071375	cellular response to peptide hormone stimulus	22/580	369/18805	0.0596205962059621	1.93304364078124	3.22914197638793	0.00259151351294675	0.079066905656594	0.0698236300281576	GRB14/RAB13/IGF1R/GDF15/SOCS3/SOCS1/CTSD/LEPROT/VAMP2/PIP4K2B/ZDHHC7/GCLC/IRS1/SOCS7/CA2/RAF1/MAP1B/BCAR3/NUCKS1/PPP3CA/INSR/PIK3R1	22
GO:0032868	response to insulin	20/580	324/18805	0.0617283950617284	2.00138356747552	3.2435125417114	0.00268404841402498	0.0813513884435072	0.0718410465388266	GRB14/RAB13/IGF1R/SOCS3/ADM/SOCS1/CTSD/EIF6/TNFSF10/VAMP2/PIP4K2B/ZDHHC7/GCLC/IRS1/SOCS7/RAF1/BCAR3/NUCKS1/INSR/PIK3R1	20
GO:0048332	mesoderm morphogenesis	8/580	78/18805	0.102564102564103	3.32537577365164	3.67123080819926	0.00274902062914859	0.0818452989090729	0.0722772166573902	TXNRD1/KLF4/SNAI1/EPB41L5/MESP1/EXOC4/LEF1/POFUT2	8
GO:0060443	mammary gland morphogenesis	6/580	46/18805	0.130434782608696	4.22901049475262	3.91154994749129	0.00275373144904783	0.0818452989090729	0.0722772166573902	PGR/ESR1/MED1/IGFBP5/MSX2/AREG	6
GO:0043373	CD4-positive, alpha-beta T cell lineage commitment	5/580	32/18805	0.15625	5.06600215517241	4.10658771042478	0.0027714058237064	0.0818452989090729	0.0722772166573902	IL6ST/BRD2/SOCS3/ZFPM1/LGALS1	5
GO:0060603	mammary gland duct morphogenesis	5/580	32/18805	0.15625	5.06600215517241	4.10658771042478	0.0027714058237064	0.0818452989090729	0.0722772166573902	PGR/ESR1/MED1/MSX2/AREG	5
GO:0006405	RNA export from nucleus	9/580	96/18805	0.09375	3.03960129310345	3.57405274317595	0.00284485832452768	0.0834793777140066	0.0737202643265136	HNRNPA1/NXF1/ALYREF/NUP62/NUP98/RBM15B/GLE1/XPO5/CASC3	9
GO:0060216	definitive hemopoiesis	4/580	20/18805	0.2	6.48448275862069	4.37774462244341	0.00292730501654817	0.083948096809832	0.0741341880593606	ZFPM1/HOXB3/HIPK1/TGFBR3	4
GO:0060602	branch elongation of an epithelium	4/580	20/18805	0.2	6.48448275862069	4.37774462244341	0.00292730501654817	0.083948096809832	0.0741341880593606	ESR1/MED1/YAP1/AREG	4
GO:0006354	DNA-templated transcription elongation	11/580	134/18805	0.082089552238806	2.66154143077715	3.44338143945309	0.0029404308671202	0.083948096809832	0.0741341880593606	CDK12/HEXIM1/MED1/ELP2/CDK9/MED14/SUPT4H1/LDB1/LARP7/EPOP/LEO1	11
GO:0002317	plasma cell differentiation	3/580	10/18805	0.3	9.72672413793103	4.9241971465178	0.00297857077157939	0.083948096809832	0.0741341880593606	BCL6/LGALS1/NFKBIZ	3
GO:0031652	positive regulation of heat generation	3/580	10/18805	0.3	9.72672413793103	4.9241971465178	0.00297857077157939	0.083948096809832	0.0741341880593606	ABAT/PTGER3/TNF	3
GO:1902107	positive regulation of leukocyte differentiation	14/580	195/18805	0.0717948717948718	2.32776304155614	3.32483459311104	0.0029883846053424	0.083948096809832	0.0741341880593606	AMBRA1/KLF10/BRD2/BCL6/SOCS1/CYLD/LEF1/RIPK1/RHOH/SMARCC2/NFKBIZ/TNF/EGR3/PPP3CA	14
GO:1903708	positive regulation of hemopoiesis	14/580	195/18805	0.0717948717948718	2.32776304155614	3.32483459311104	0.0029883846053424	0.083948096809832	0.0741341880593606	AMBRA1/KLF10/BRD2/BCL6/SOCS1/CYLD/LEF1/RIPK1/RHOH/SMARCC2/NFKBIZ/TNF/EGR3/PPP3CA	14
GO:0032869	cellular response to insulin stimulus	17/580	260/18805	0.0653846153846154	2.11992705570292	3.24390660024553	0.00303843246487897	0.0848367173678632	0.0749189248915931	GRB14/RAB13/IGF1R/SOCS3/SOCS1/CTSD/VAMP2/PIP4K2B/ZDHHC7/GCLC/IRS1/SOCS7/RAF1/BCAR3/NUCKS1/INSR/PIK3R1	17
GO:0008286	insulin receptor signaling pathway	13/580	176/18805	0.0738636363636364	2.39483738244514	3.31658009792112	0.00325386703399613	0.0903046109977118	0.079747597250444	GRB14/IGF1R/SOCS3/SOCS1/CTSD/PIP4K2B/IRS1/SOCS7/RAF1/BCAR3/NUCKS1/INSR/PIK3R1	13
GO:0015931	nucleobase-containing compound transport	16/580	240/18805	0.0666666666666667	2.16149425287356	3.2305804370535	0.00328634547892713	0.090659842044415	0.0800613001957351	ZFP36/HNRNPA1/G3BP2/SLC35B2/NXF1/ALYREF/NUP62/NUP98/RIPK1/RBM15B/SEH1L/SLC25A25/GLE1/XPO5/FXR1/CASC3	16
GO:0022904	respiratory electron transport chain	10/580	117/18805	0.0854700854700855	2.77114647804303	3.42824102382307	0.00335525719478663	0.0918450708741905	0.0811079704634244	COX6A1/UQCR11/COX8A/NDUFC2/UQCRHL/SDHA/DNAJC15/NDUFB8/IMMP2L/ETFB	10
GO:0010721	negative regulation of cell development	18/580	285/18805	0.0631578947368421	2.04773139745917	3.1794884159157	0.00336918102403694	0.0918450708741905	0.0811079704634244	PRDX2/MYC/CERS2/BCL6/SOCS1/MAFB/LTF/ZFPM1/LGALS1/NFATC4/DAB1/PGLYRP2/NRARP/TNF/CDKN2B/PPP3CA/HOOK3/PIK3R1	18
GO:0009798	axis specification	9/580	99/18805	0.0909090909090909	2.9474921630094	3.46583753265404	0.00350285874440509	0.0945222418330993	0.0834721681388571	FRS2/EPB41L5/MESP1/ETS2/BASP1/LDB1/GPC3/TDRKH/NRARP	9
GO:0090200	positive regulation of release of cytochrome c from mitochondria	4/580	21/18805	0.19047619047619	6.17569786535304	4.23340553523996	0.00352893978625854	0.0945222418330993	0.0834721681388571	PMAIP1/PYCARD/TNFSF10/BIK	4
GO:0097501	stress response to metal ion	4/580	21/18805	0.19047619047619	6.17569786535304	4.23340553523996	0.00352893978625854	0.0945222418330993	0.0834721681388571	MT1X/SLC30A1/MT1G/MT2A	4
GO:0002363	alpha-beta T cell lineage commitment	5/580	34/18805	0.147058823529412	4.76800202839757	3.92294510657978	0.00364070041126366	0.0969520623970618	0.0856179317890724	IL6ST/BRD2/SOCS3/ZFPM1/LGALS1	5
GO:0030218	erythrocyte differentiation	11/580	138/18805	0.0797101449275362	2.58439530234883	3.33250780377927	0.00368792173992353	0.097324524896589	0.0859468517531255	ZFP36/MED1/BCL6/HSPA1A/MYB/MAFB/KLF2/ZFPM1/LDB1/TGFBR3/HSPA1B	11
GO:0032784	regulation of DNA-templated transcription elongation	9/580	100/18805	0.09	2.91801724137931	3.43067043671428	0.00374689679553802	0.097324524896589	0.0859468517531255	CDK12/HEXIM1/MED1/CDK9/MED14/SUPT4H1/LDB1/LARP7/LEO1	9
GO:0045638	negative regulation of myeloid cell differentiation	9/580	100/18805	0.09	2.91801724137931	3.43067043671428	0.00374689679553802	0.097324524896589	0.0859468517531255	MYC/ZFP36/MYB/MAFB/LTF/ZFPM1/LDB1/LEO1/PIK3R1	9
GO:0060419	heart growth	9/580	100/18805	0.09	2.91801724137931	3.43067043671428	0.00374689679553802	0.097324524896589	0.0859468517531255	SORBS2/MESP1/BASP1/RGS2/FOXP1/PIM1/YAP1/TGFBR3/DUSP6	9
GO:0002221	pattern recognition receptor signaling pathway	18/580	288/18805	0.0625	2.02640086206897	3.1313620813938	0.0037603137468185	0.097324524896589	0.0859468517531255	ESR1/PYCARD/HSPA1A/S100A8/CYLD/NEK7/ZDHHC5/LTF/S100A9/PPP2CA/PELI1/TSPAN6/NFKBIZ/TNF/ZCCHC3/CYBA/HSPA1B/PIK3R1	18
GO:0003002	regionalization	24/580	430/18805	0.0558139534883721	1.80962309542903	3.02976393672315	0.0039497216972023	0.10165568636319	0.0897716810331485	FRS2/GRSF1/PCGF2/SNAI1/EPB41L5/MESP1/MAFB/ETS2/BASP1/HES6/LEF1/HOXB3/MSX2/LDB1/GPC3/HIPK1/ROBO2/TDRKH/KAT2A/HOXB7/NRARP/HOXC9/EXT1/BMPR1B	24
GO:0032525	somite rostral/caudal axis specification	3/580	11/18805	0.272727272727273	8.84247648902821	4.64136054664641	0.00400229648240171	0.102436554969026	0.0904612625993136	EPB41L5/MESP1/NRARP	3
GO:0006882	intracellular zinc ion homeostasis	5/580	35/18805	0.142857142857143	4.63177339901478	3.83641851888529	0.00414161480193233	0.105416681726532	0.0930929991827185	MT1X/ATP13A2/SLC30A1/MT1G/MT2A	5
GO:0051648	vesicle localization	15/580	224/18805	0.0669642857142857	2.17114378078818	3.14561113525761	0.00417183398664239	0.10546757809579	0.0931379455383064	STARD3/PDCD6/YKT6/ATP13A2/EXOC2/MX1/EXOC4/TRAPPC10/BLOC1S1/F8A1/BLOC1S6/TRAPPC9/HTT/COPS5/TRAPPC1	15
GO:0060713	labyrinthine layer morphogenesis	4/580	22/18805	0.181818181818182	5.89498432601881	4.09812797433334	0.00420932345683106	0.10546757809579	0.0931379455383064	SPINT2/SOCS3/ADM/LEF1	4
GO:0032968	positive regulation of transcription elongation by RNA polymerase II	6/580	50/18805	0.12	3.89068965517241	3.65118035235258	0.00421229311257334	0.10546757809579	0.0931379455383064	CDK12/MED1/CDK9/MED14/LDB1/LEO1	6
GO:0035282	segmentation	9/580	102/18805	0.0882352941176471	2.86080121703854	3.36162898675934	0.00427481479992699	0.105882106361633	0.0935040135920647	FRS2/EPB41L5/MESP1/MAFB/BASP1/LEF1/TDRKH/KAT2A/NRARP	9
GO:0048009	insulin-like growth factor receptor signaling pathway	9/580	102/18805	0.0882352941176471	2.86080121703854	3.36162898675934	0.00427481479992699	0.105882106361633	0.0935040135920647	IGFBP4/IGFBP2/IGFBP5/IGF1R/IRS1/RAF1/EIF2AK3/INSR/PIK3R1	9
GO:0071248	cellular response to metal ion	13/580	182/18805	0.0714285714285714	2.31588669950739	3.18225310684994	0.00432703653035136	0.106602445429565	0.0941401417945849	JUND/MT1X/FOSB/JUNB/ATP13A2/NEK7/STK39/ENDOG/NFATC4/MT1G/EIF2AK3/MT2A/SLC12A2	13
GO:0097009	energy homeostasis	8/580	84/18805	0.0952380952380952	3.08784893267652	3.42120850357123	0.0043550500722973	0.106721891931243	0.0942456244648884	PRCP/CRTC3/GDF15/STK39/PCSK1N/SLC25A25/MEX3C/MFSD2A	8
GO:0043542	endothelial cell migration	18/580	293/18805	0.0614334470989761	1.99182064257973	3.05242942792414	0.00449536656600947	0.109158867506097	0.0963977066731554	KLF4/PDCD6/JUP/S100A7/EFNA1/PRCP/GADD45A/RAB13/PLK2/CSNK2B/S100A8/S100A9/BCAS3/FOXP1/TNF/TGFBR3/EGR3/MAP2K3	18
GO:0019080	viral gene expression	10/580	122/18805	0.0819672131147541	2.65757490107405	3.27668822160568	0.00452557926929988	0.109158867506097	0.0963977066731554	OAZ1/ZFP36/HEXIM1/CDK9/TMPRSS2/LEF1/MGAT2/EIF2D/LARP7/NUCKS1	10
GO:0045582	positive regulation of T cell differentiation	10/580	122/18805	0.0819672131147541	2.65757490107405	3.27668822160568	0.00452557926929988	0.109158867506097	0.0963977066731554	AMBRA1/BRD2/BCL6/SOCS1/CYLD/LEF1/RHOH/SMARCC2/NFKBIZ/EGR3	10
GO:0050792	regulation of viral process	11/580	142/18805	0.0774647887323944	2.51159543467703	3.22548008878825	0.00458013881295376	0.109899476621239	0.0970517352635213	ZFP36/HEXIM1/CSNK2B/MX1/CXCR4/LTF/TMPRSS2/LGALS1/LARP7/CXCL8/TNF	11
GO:0043368	positive T cell selection	6/580	51/18805	0.117647058823529	3.81440162271805	3.59029020526456	0.00465218176227354	0.111049748076654	0.0980675348305822	IL6ST/BRD2/SOCS3/CYLD/ZFPM1/LGALS1	6
GO:1900101	regulation of endoplasmic reticulum unfolded protein response	5/580	36/18805	0.138888888888889	4.50311302681992	3.75310040184844	0.00468983830002911	0.111371572413578	0.0983517364601872	PPP1R15A/AGR2/PPP1R15B/COPS5/PIK3R1	5
GO:0050729	positive regulation of inflammatory response	12/580	163/18805	0.0736196319018405	2.38692616881743	3.17253368883176	0.00472437199659308	0.111616316863099	0.0985678691866788	IL6ST/CEBPB/DDT/PYCARD/S100A8/ZDHHC5/S100A9/RIPK1/LGALS1/PTGER3/NFKBIZ/TNF	12
GO:0009636	response to toxic substance	17/580	272/18805	0.0625	2.02640086206897	3.04182	0.00478516620542993	0.112475819940896	0.0993268925026138	PRDX2/TXNRD1/GSTM3/EPHX1/MT1X/SLC30A1/S100A9/KCNC2/PIM1/NNT/MT1G/PXDNL/MAP1B/TNF/RDH11/MT2A/CNP	17
GO:0035019	somatic stem cell population maintenance	7/580	68/18805	0.102941176470588	3.3376014198783	3.44492871731314	0.00488156354041377	0.114159204216681	0.100813481612072	KLF4/MYC/KLF10/MED14/LDB1/RAF1/YAP1	7
GO:0032891	negative regulation of organic acid transport	4/580	23/18805	0.173913043478261	5.63868065967016	3.97093542711867	0.00497297704275142	0.114552526179779	0.101160822474917	ABAT/RGS2/SLC43A1/TNF	4
GO:0046426	negative regulation of receptor signaling pathway via JAK-STAT	4/580	23/18805	0.173913043478261	5.63868065967016	3.97093542711867	0.00497297704275142	0.114552526179779	0.101160822474917	SOCS3/SOCS1/LEPROT/DAB1	4
GO:0061687	detoxification of inorganic compound	4/580	23/18805	0.173913043478261	5.63868065967016	3.97093542711867	0.00497297704275142	0.114552526179779	0.101160822474917	MT1X/SLC30A1/MT1G/MT2A	4
GO:0050673	epithelial cell proliferation	26/580	488/18805	0.0532786885245902	1.72742368569813	2.90452772177531	0.00508509737097536	0.115509510745764	0.102005931256184	PGR/CEBPB/FRS2/IGFBP4/PDCD6/MYC/ESR1/ZFP36/MED1/IGFBP5/NME1/PEX2/OVOL1/CDKN1C/NRAS/GPC3/RAF1/NRARP/YAP1/NFKBIZ/TNF/ECM1/TGFBR3/CDKN2B/EGR3/AREG	26
GO:0008593	regulation of Notch signaling pathway	9/580	105/18805	0.0857142857142857	2.77906403940887	3.2611500150239	0.00517346538226521	0.115509510745764	0.102005931256184	IL6ST/TSPAN15/BCL6/MESP1/ARRDC1/ROBO2/NRARP/YAP1/NEURL1	9
GO:0072331	signal transduction by p53 class mediator	12/580	165/18805	0.0727272727272727	2.35799373040752	3.12551892241742	0.0052029564954207	0.115509510745764	0.102005931256184	RPL26/PMAIP1/MYC/HEXIM1/SNAI1/PYCARD/EEF1E1/WWOX/HIPK1/PPP1R13B/TAF9/MUC1	12
GO:0008611	ether lipid biosynthetic process	3/580	12/18805	0.25	8.10560344827586	4.3923696524579	0.00521510272088535	0.115509510745764	0.102005931256184	AGPS/FAR1/DHRS7B	3
GO:0046504	glycerol ether biosynthetic process	3/580	12/18805	0.25	8.10560344827586	4.3923696524579	0.00521510272088535	0.115509510745764	0.102005931256184	AGPS/FAR1/DHRS7B	3
GO:0060148	positive regulation of post-transcriptional gene silencing	3/580	12/18805	0.25	8.10560344827586	4.3923696524579	0.00521510272088535	0.115509510745764	0.102005931256184	ZFP36/RIPK1/FXR1	3
GO:1900370	positive regulation of post-transcriptional gene silencing by RNA	3/580	12/18805	0.25	8.10560344827586	4.3923696524579	0.00521510272088535	0.115509510745764	0.102005931256184	ZFP36/RIPK1/FXR1	3
GO:2000637	positive regulation of miRNA-mediated gene silencing	3/580	12/18805	0.25	8.10560344827586	4.3923696524579	0.00521510272088535	0.115509510745764	0.102005931256184	ZFP36/RIPK1/FXR1	3
GO:0043525	positive regulation of neuron apoptotic process	7/580	69/18805	0.101449275362319	3.2892303848076	3.39845057106547	0.00529186381496495	0.116648883232266	0.103012105992644	MCL1/TRAF7/TFAP2B/MYB/RIPK1/NFATC4/TNF	7
GO:0046660	female sex differentiation	10/580	125/18805	0.08	2.59379310344828	3.18936235156091	0.00536864587994018	0.117777864613735	0.104009104390821	PGR/CEBPB/ESR1/TIPARP/ROBO2/IMMP2L/BMPR1B/NRIP1/INSR/ARID5B	10
GO:0007219	Notch signaling pathway	13/580	187/18805	0.0695187165775401	2.25396459524249	3.07429058121536	0.00542485021816958	0.11844684812847	0.104599880734475	IL6ST/TSPAN15/SNAI1/BCL6/SORBS2/MESP1/PSENEN/ARRDC1/ROBO2/NRARP/YAP1/NEURL1/KRT19	13
GO:0030522	intracellular receptor signaling pathway	22/580	393/18805	0.0559796437659033	1.81499517416864	2.91276990500834	0.00545839309160692	0.118617061193552	0.104750195129398	PGR/ESR1/MED1/PRCP/PYCARD/HSPA1A/CYLD/NEK7/ZDHHC5/SCGB2A2/KLF2/FOXP1/ZDHHC7/PIM1/PPP2CA/PELI1/TSPAN6/TNF/ZCCHC3/HSPA1B/SCGB2A1/PMEPA1	22
GO:0002285	lymphocyte activation involved in immune response	15/580	231/18805	0.0649350649350649	2.10535154500672	3.01549797732158	0.00552703540179488	0.119544845521451	0.105569517311278	IL6ST/BRD2/BCL6/JUNB/SOCS3/MYB/LEF1/ZFPM1/FOXP1/HMCES/EXOSC6/LGALS1/PGLYRP2/NFKBIZ/PIK3R1	15
GO:0019083	viral transcription	6/580	53/18805	0.113207547169811	3.6704619388419	3.47300876752765	0.00563201788750298	0.12012364077651	0.106080648807013	ZFP36/HEXIM1/CDK9/LEF1/LARP7/NUCKS1	6
GO:0060324	face development	6/580	53/18805	0.113207547169811	3.6704619388419	3.47300876752765	0.00563201788750298	0.12012364077651	0.106080648807013	TIPARP/LEF1/HOXB3/CSRNP1/RAF1/ARID5B	6
GO:0097720	calcineurin-mediated signaling	6/580	53/18805	0.113207547169811	3.6704619388419	3.47300876752765	0.00563201788750298	0.12012364077651	0.106080648807013	CALM2/FHL2/NFATC4/TNF/PPP3CA/ERBB3	6
GO:0043627	response to estrogen	7/580	70/18805	0.1	3.24224137931034	3.35281726204962	0.00572749709897504	0.121413133934224	0.107219394435418	GSTM3/IGFBP2/ESR1/CITED4/BCAS3/ARPC1B/KRT19	7
GO:1903037	regulation of leukocyte cell-cell adhesion	22/580	395/18805	0.0556962025316456	1.80580532518551	2.88740122382551	0.00578482974215573	0.121413133934224	0.107219394435418	AMBRA1/IL6ST/CEBPB/PRDX2/KLF4/IGFBP2/BRD2/PYCARD/BCL6/SOCS1/CYLD/LEF1/SKAP1/RHOH/LGALS1/SMARCC2/PELI1/NRARP/NFKBIZ/TNF/EGR3/PPP3CA	22
GO:0034114	regulation of heterotypic cell-cell adhesion	4/580	24/18805	0.166666666666667	5.40373563218391	3.85099410042825	0.00582424627728748	0.121413133934224	0.107219394435418	KLF4/SKAP1/CEACAM6/TNF	4
GO:0036499	PERK-mediated unfolded protein response	4/580	24/18805	0.166666666666667	5.40373563218391	3.85099410042825	0.00582424627728748	0.121413133934224	0.107219394435418	PPP1R15A/AGR2/PPP1R15B/EIF2AK3	4
GO:0071294	cellular response to zinc ion	4/580	24/18805	0.166666666666667	5.40373563218391	3.85099410042825	0.00582424627728748	0.121413133934224	0.107219394435418	MT1X/ATP13A2/MT1G/MT2A	4
GO:0043523	regulation of neuron apoptotic process	16/580	255/18805	0.0627450980392157	2.03434753211629	2.96667495575916	0.0058755238849205	0.121709998449126	0.107481554158059	AMBRA1/IL6ST/CEBPB/MCL1/TRAF7/ATP13A2/TFAP2B/CLU/MYB/TMBIM4/RIPK1/GCLC/SEMA3E/NFATC4/TNF/ERBB3	16
GO:0001959	regulation of cytokine-mediated signaling pathway	13/580	189/18805	0.0687830687830688	2.23011311804415	3.03206227096927	0.00592196070464908	0.121709998449126	0.107481554158059	IL6ST/MED1/PYDC1/PYCARD/HSPA1A/CXCR4/YTHDF3/CYLD/RIPK1/HIPK1/ECM1/EXT1/HSPA1B	13
GO:1902229	regulation of intrinsic apoptotic signaling pathway in response to DNA damage	5/580	38/18805	0.131578947368421	4.26610707803993	3.59525864849438	0.00593748264328475	0.121709998449126	0.107481554158059	RPL26/SNAI1/CLU/TAF9/MUC1	5
GO:0098754	detoxification	12/580	168/18805	0.0714285714285714	2.31588669950739	3.05626132013132	0.00599240979755333	0.121709998449126	0.107481554158059	PRDX2/TXNRD1/GSTM3/MT1X/SLC30A1/S100A9/PIM1/NNT/MT1G/PXDNL/RDH11/MT2A	12
GO:0022900	electron transport chain	10/580	127/18805	0.078740157480315	2.5529459679609	3.13255258424925	0.00599568915878872	0.121709998449126	0.107481554158059	COX6A1/UQCR11/COX8A/NDUFC2/UQCRHL/SDHA/DNAJC15/NDUFB8/IMMP2L/ETFB	10
GO:0071383	cellular response to steroid hormone stimulus	14/580	211/18805	0.0663507109004739	2.15125020428175	3.00005961058211	0.00599699797003506	0.121709998449126	0.107481554158059	PGR/ESR1/ZFP36/MED1/IGF1R/SMYD3/HSPA1A/SCGB2A2/FOXP1/ZDHHC7/USP8/HSPA1B/SCGB2A1/PMEPA1	14
GO:0002218	activation of innate immune response	19/580	325/18805	0.0584615384615385	1.89546419098143	2.90498751331711	0.00604287009587065	0.122103081279281	0.107828683843675	ESR1/HEXIM1/PYCARD/HSPA1A/S100A8/CYLD/NEK7/ZDHHC5/LTF/S100A9/PPP2CA/PELI1/TSPAN6/NFKBIZ/TNF/ZCCHC3/CYBA/HSPA1B/PIK3R1	19
GO:0060537	muscle tissue development	24/580	446/18805	0.0538116591928251	1.74470388124323	2.83943469903859	0.0061675689689269	0.123683112603759	0.109224002425035	FRS2/MED1/FKBP1A/IGFBP5/SORBS2/MESP1/TFAP2B/TIPARP/FHL2/LEF1/ZFPM1/RGS2/FOXP1/PIM1/MSX2/RBM24/KAT2A/SAP30/YAP1/TGFBR3/NEURL1/PPP3CA/GPCPD1/ERBB3	24
GO:0001836	release of cytochrome c from mitochondria	6/580	54/18805	0.111111111111111	3.60249042145594	3.41648212073753	0.00617475925740493	0.123683112603759	0.109224002425035	PMAIP1/MCL1/PYCARD/CLU/TNFSF10/BIK	6
GO:0007584	response to nutrient	12/580	169/18805	0.0710059171597633	2.30218322791267	3.03350313641442	0.00627566828194596	0.12516018950184	0.110528402413858	IGFBP2/MED1/IGF1R/PIM1/NNT/GCLC/GDAP1/KYNU/MAP1B/NFKBIZ/CDKN2B/AGL	12
GO:0034101	erythrocyte homeostasis	11/580	149/18805	0.0738255033557047	2.3936010182828	3.04668582661782	0.00654646723724425	0.128299980641526	0.113301137897593	ZFP36/MED1/BCL6/HSPA1A/MYB/MAFB/KLF2/ZFPM1/LDB1/TGFBR3/HSPA1B	11
GO:0031669	cellular response to nutrient levels	16/580	258/18805	0.062015503875969	2.01069232825448	2.91606590909933	0.00655242776397337	0.128299980641526	0.113301137897593	AMBRA1/PMAIP1/HNRNPA1/MED1/SLC38A2/KLF10/IGF1R/MAP1LC3B2/DNAJC15/PIM1/SEH1L/WDR24/GDAP1/MFSD2A/CDKN2B/EIF2AK3	16
GO:0061515	myeloid cell development	8/580	90/18805	0.0888888888888889	2.88199233716475	3.19263697710425	0.00660084610152496	0.128299980641526	0.113301137897593	CEBPB/MED1/BCL6/MYB/LTF/KLF2/ZFPM1/FOXP1	8
GO:0060670	branching involved in labyrinthine layer morphogenesis	3/580	13/18805	0.230769230769231	7.48209549071618	4.17067115479033	0.00662578617367421	0.128299980641526	0.113301137897593	SPINT2/SOCS3/ADM	3
GO:0090084	negative regulation of inclusion body assembly	3/580	13/18805	0.230769230769231	7.48209549071618	4.17067115479033	0.00662578617367421	0.128299980641526	0.113301137897593	HSPA1A/HSPA2/HSPA1B	3
GO:1901503	ether biosynthetic process	3/580	13/18805	0.230769230769231	7.48209549071618	4.17067115479033	0.00662578617367421	0.128299980641526	0.113301137897593	AGPS/FAR1/DHRS7B	3
GO:0046626	regulation of insulin receptor signaling pathway	7/580	72/18805	0.0972222222222222	3.15217911877395	3.26397139947636	0.0066785046835102	0.128299980641526	0.113301137897593	GRB14/SOCS3/SOCS1/CTSD/PIP4K2B/IRS1/NUCKS1	7
GO:0002758	innate immune response-activating signaling pathway	18/580	305/18805	0.059016393442623	1.91345392877332	2.86916849269184	0.00675064226006401	0.128299980641526	0.113301137897593	ESR1/PYCARD/HSPA1A/S100A8/CYLD/NEK7/ZDHHC5/LTF/S100A9/PPP2CA/PELI1/TSPAN6/NFKBIZ/TNF/ZCCHC3/CYBA/HSPA1B/PIK3R1	18
GO:0072538	T-helper 17 type immune response	6/580	55/18805	0.109090909090909	3.53699059561129	3.36128173517874	0.00675457283312519	0.128299980641526	0.113301137897593	IL6ST/BRD2/JUNB/SOCS3/LGALS1/NFKBIZ	6
GO:0043123	positive regulation of canonical NF-kappaB signal transduction	14/580	214/18805	0.0654205607476635	2.12109249113761	2.94240401527072	0.00676692655962681	0.128299980641526	0.113301137897593	FKBP1A/PYCARD/SLC35B2/PLK2/LTF/TNFSF10/NUP62/RIPK1/TMEM101/LGALS1/PELI1/TSPAN6/TNF/ECM1	14
GO:0009220	pyrimidine ribonucleotide biosynthetic process	4/580	25/18805	0.16	5.18758620689655	3.73758708626266	0.00676728788710461	0.128299980641526	0.113301137897593	NME1/CTPS2/UCK2/DCK	4
GO:0072540	T-helper 17 cell lineage commitment	4/580	25/18805	0.16	5.18758620689655	3.73758708626266	0.00676728788710461	0.128299980641526	0.113301137897593	IL6ST/BRD2/SOCS3/LGALS1	4
GO:0034976	response to endoplasmic reticulum stress	17/580	283/18805	0.0600706713780919	1.94763616425003	2.86547255715475	0.00703878610707002	0.132900358997015	0.117363711405633	CEBPB/PMAIP1/PDIA4/PPP1R15A/AGR2/AMFR/PPP1R15B/RNF7/HSPA1A/CLU/TMBIM4/FAF1/RHBDD1/CXCL8/EIF2AK3/COPS5/PIK3R1	17
GO:0007389	pattern specification process	25/580	476/18805	0.0525210084033613	1.70285786728485	2.77081130351684	0.00707683353191233	0.133073355434776	0.117516483784495	FRS2/GRSF1/PCGF2/SHROOM3/SNAI1/EPB41L5/MESP1/MAFB/ETS2/BASP1/HES6/LEF1/HOXB3/MSX2/LDB1/GPC3/HIPK1/ROBO2/TDRKH/KAT2A/HOXB7/NRARP/HOXC9/EXT1/BMPR1B	25
GO:0045670	regulation of osteoclast differentiation	7/580	73/18805	0.0958904109589041	3.10899858290033	3.2207053372146	0.00719575456587618	0.134759517418665	0.11900552587553	CEBPB/KLF10/MAFB/LTF/TNF/PPP3CA/PIK3R1	7
GO:0009206	purine ribonucleoside triphosphate biosynthetic process	9/580	111/18805	0.0810810810810811	2.62884436160298	3.07040248296843	0.00740396876477512	0.138097506474976	0.121953289051165	ATP5MF/ATP5MG/NDUFC2/NDUFA11/NDUFA13/ATP5PO/NME1/SDHA/NDUFB8	9
GO:0009260	ribonucleotide biosynthetic process	12/580	173/18805	0.069364161849711	2.24895355790313	2.94404844990049	0.00751620422461926	0.139289181364774	0.123005651805571	ATP5MF/ATP5MG/NDUFC2/NDUFA11/NDUFA13/ATP5PO/NME1/CTPS2/SDHA/UCK2/NDUFB8/DCK	12
GO:1903039	positive regulation of leukocyte cell-cell adhesion	17/580	285/18805	0.0596491228070175	1.93396854204477	2.83425901663575	0.00752832779679375	0.139289181364774	0.123005651805571	AMBRA1/IL6ST/IGFBP2/BRD2/PYCARD/BCL6/SOCS1/CYLD/LEF1/SKAP1/RHOH/LGALS1/SMARCC2/NFKBIZ/TNF/EGR3/PPP3CA	17
GO:0001890	placenta development	11/580	152/18805	0.0723684210526316	2.34635889292196	2.97312823751168	0.00756864415630493	0.139474974512387	0.123169724901552	CEBPB/SPINT2/MED1/LDOC1/SNAI1/JUNB/SOCS3/ADM/CDKN1C/LEF1/KRT19	11
GO:0060420	regulation of heart growth	7/580	74/18805	0.0945945945945946	3.06698508853681	3.17817693167393	0.00774208606087833	0.14135111923966	0.124826539901817	BASP1/RGS2/FOXP1/PIM1/YAP1/TGFBR3/DUSP6	7
GO:0033598	mammary gland epithelial cell proliferation	4/580	26/18805	0.153846153846154	4.98806366047745	3.63009403097464	0.00780605794380851	0.14135111923966	0.124826539901817	CEBPB/ESR1/MED1/AREG	4
GO:0035988	chondrocyte proliferation	4/580	26/18805	0.153846153846154	4.98806366047745	3.63009403097464	0.00780605794380851	0.14135111923966	0.124826539901817	LTF/LEF1/EXT1/BMPR1B	4
GO:0051953	negative regulation of amine transport	4/580	26/18805	0.153846153846154	4.98806366047745	3.63009403097464	0.00780605794380851	0.14135111923966	0.124826539901817	ABAT/RGS2/SLC43A1/TNF	4
GO:0009145	purine nucleoside triphosphate biosynthetic process	9/580	112/18805	0.0803571428571429	2.60537253694581	3.03983973214839	0.00783777100342636	0.14135111923966	0.124826539901817	ATP5MF/ATP5MG/NDUFC2/NDUFA11/NDUFA13/ATP5PO/NME1/SDHA/NDUFB8	9
GO:0051168	nuclear export	12/580	174/18805	0.0689655172413793	2.23602853745541	2.92206847348202	0.00785454450300694	0.14135111923966	0.124826539901817	HNRNPA1/BAG3/EIF6/NXF1/ALYREF/NUP62/NUP98/RBM15B/GLE1/XPO5/FRAT2/CASC3	12
GO:0019646	aerobic electron transport chain	8/580	93/18805	0.0860215053763441	2.7890248424175	3.08534043349114	0.00800825703812086	0.143556576554953	0.126774169372669	COX6A1/UQCR11/COX8A/NDUFC2/UQCRHL/SDHA/DNAJC15/NDUFB8	8
GO:0090199	regulation of release of cytochrome c from mitochondria	5/580	41/18805	0.121951219512195	3.95395290159798	3.37783267385755	0.00822086775905681	0.143825091389087	0.12701129361928	PMAIP1/PYCARD/CLU/TNFSF10/BIK	5
GO:0048568	embryonic organ development	24/580	457/18805	0.0525164113785558	1.70270882064438	2.71296686078957	0.00822400605816919	0.143825091389087	0.12701129361928	CEBPB/SPINT2/FRS2/MED1/EFNA1/PCGF2/SNAI1/JUNB/SOCS3/ADM/MESP1/MAFB/CDKN1C/LEF1/ZFPM1/HOXB3/HIPK1/HOXB7/CXCL8/SLC39A1/HOXC9/YAP1/TNF/KRT19	24
GO:0008380	RNA splicing	25/580	482/18805	0.0518672199170125	1.68166046644727	2.70457285769239	0.00822763543426914	0.143825091389087	0.12701129361928	RPS26/CDK12/SNRPD3/HNRNPA1/SLC38A2/LSM4/GRSF1/CCNL2/SF3B3/HSPA1A/ALYREF/POLR2A/PRPF8/NUP98/RBM15B/TIA1/RBM24/HOXB-AS3/LARP7/KAT2A/TAF9/CASC3/SNRNP27/USP22/PIK3R1	25
GO:0006241	CTP biosynthetic process	3/580	14/18805	0.214285714285714	6.94766009852217	3.9713719338331	0.008241767772242	0.143825091389087	0.12701129361928	NME1/CTPS2/UCK2	3
GO:0014733	regulation of skeletal muscle adaptation	3/580	14/18805	0.214285714285714	6.94766009852217	3.9713719338331	0.008241767772242	0.143825091389087	0.12701129361928	IGFBP5/PPP3CA/TNNT1	3
GO:0034116	positive regulation of heterotypic cell-cell adhesion	3/580	14/18805	0.214285714285714	6.94766009852217	3.9713719338331	0.008241767772242	0.143825091389087	0.12701129361928	SKAP1/CEACAM6/TNF	3
GO:1903265	positive regulation of tumor necrosis factor-mediated signaling pathway	3/580	14/18805	0.214285714285714	6.94766009852217	3.9713719338331	0.008241767772242	0.143825091389087	0.12701129361928	HSPA1A/RIPK1/HSPA1B	3
GO:0033273	response to vitamin	8/580	94/18805	0.0851063829787234	2.75935436537051	3.05052156779107	0.0085240532916565	0.148189862319477	0.130865803266146	MED1/IGF1R/PIM1/NNT/GDAP1/KYNU/MAP1B/NFKBIZ	8
GO:0072132	mesenchyme morphogenesis	6/580	58/18805	0.103448275862069	3.35404280618312	3.20308019729832	0.00873023659623307	0.151054641489782	0.133395676912252	MYC/SNAI1/EXOC4/LEF1/MSX2/ROBO2	6
GO:0051251	positive regulation of lymphocyte activation	19/580	337/18805	0.056379821958457	1.82796991711859	2.73605563922417	0.0087544148638532	0.151054641489782	0.133395676912252	AMBRA1/IL6ST/IGFBP2/BRD2/PYCARD/BCL6/SOCS1/CYLD/LEF1/RHOH/HMCES/EXOSC6/LGALS1/SMARCC2/BLOC1S6/PELI1/NFKBIZ/EGR3/PPP3CA	19
GO:0048525	negative regulation of viral process	7/580	76/18805	0.0921052631578947	2.98627495462795	3.09523920329962	0.00892573760685235	0.15205313623871	0.134277443150039	ZFP36/HEXIM1/CSNK2B/MX1/LTF/LARP7/TNF	7
GO:0018904	ether metabolic process	4/580	27/18805	0.148148148148148	4.80332056194125	3.5279749728284	0.00894430213168885	0.15205313623871	0.134277443150039	EPHX1/AGPS/FAR1/DHRS7B	4
GO:0042026	protein refolding	4/580	27/18805	0.148148148148148	4.80332056194125	3.5279749728284	0.00894430213168885	0.15205313623871	0.134277443150039	FKBP1A/HSPA1A/HSPA2/HSPA1B	4
GO:0060343	trabecula formation	4/580	27/18805	0.148148148148148	4.80332056194125	3.5279749728284	0.00894430213168885	0.15205313623871	0.134277443150039	FKBP1A/FHL2/MSX2/TGFBR3	4
GO:0097237	cellular response to toxic substance	10/580	135/18805	0.0740740740740741	2.40166028097063	2.91570003241754	0.00909222148707011	0.153576780832305	0.135622966862066	PRDX2/TXNRD1/GSTM3/S100A9/KCNC2/PIM1/NNT/PXDNL/TNF/RDH11	10
GO:0043903	regulation of biological process involved in symbiotic interaction	5/580	42/18805	0.119047619047619	3.85981116584565	3.30991021295527	0.00910059934170162	0.153576780832305	0.135622966862066	EXOC2/LTF/TMPRSS2/LGALS1/CXCL8	5
GO:0048872	homeostasis of number of cells	19/580	339/18805	0.056047197640118	1.81718543383176	2.70856585833165	0.00928936435747302	0.156190151806125	0.137930823056601	PRDX2/PMAIP1/ZFP36/TSC22D3/MED1/BCL6/HSPA1A/MYB/MAFB/CYLD/KLF2/ZFPM1/PPP2CA/LDB1/BLOC1S6/NFKBIZ/TGFBR3/EXT1/HSPA1B	19
GO:0060135	maternal process involved in female pregnancy	6/580	59/18805	0.101694915254237	3.29719462302747	3.15264332911125	0.00947206990623894	0.157001867653937	0.138647645683906	PGR/ESR1/MED1/LDOC1/JUNB/RGS2	6
GO:0031960	response to corticosteroid	11/580	157/18805	0.0700636942675159	2.27163408741489	2.85431044381645	0.00954384207497706	0.157001867653937	0.138647645683906	IGFBP2/ZFP36/FOSB/IGF1R/ADM/SMYD3/STK39/TNF/USP8/AREG/AGL	11
GO:0051384	response to glucocorticoid	10/580	136/18805	0.0735294117647059	2.38400101419878	2.88968620212938	0.00955214272404687	0.157001867653937	0.138647645683906	IGFBP2/ZFP36/FOSB/IGF1R/ADM/SMYD3/TNF/USP8/AREG/AGL	10
GO:0009612	response to mechanical stimulus	14/580	223/18805	0.062780269058296	2.03548786145044	2.77495896558871	0.00955918288490784	0.157001867653937	0.138647645683906	IGFBP2/JUP/BAG3/SLC38A2/FOSB/GADD45A/IGF1R/CXCR4/GCLC/ENDOG/RAF1/MAP1B/TNF/HTT	14
GO:1900076	regulation of cellular response to insulin stimulus	7/580	77/18805	0.0909090909090909	2.9474921630094	3.05478557019502	0.00956492134599285	0.157001867653937	0.138647645683906	GRB14/SOCS3/SOCS1/CTSD/PIP4K2B/IRS1/NUCKS1	7
GO:0016239	positive regulation of macroautophagy	8/580	96/18805	0.0833333333333333	2.70186781609195	2.98223253593407	0.00962971871221064	0.157001867653937	0.138647645683906	AMBRA1/BAG3/HSPB8/PIP4K2B/SNX30/WDR24/HTT/SPTLC2	8
GO:0002065	columnar/cuboidal epithelial cell differentiation	9/580	116/18805	0.0775862068965517	2.51553210463734	2.92083115879962	0.00976916073271851	0.157001867653937	0.138647645683906	PGR/IL6ST/CEBPB/KLF4/LEF1/CCNO/YAP1/MAP1B/EXT1	9
GO:0043410	positive regulation of MAPK cascade	24/580	464/18805	0.0517241379310345	1.67702140309156	2.63423934997322	0.00980296446205214	0.157001867653937	0.138647645683906	TRAF4/PRDX2/FRS2/IGFBP4/TPBG/S100A7/EFNA1/GADD45A/DDT/PYCARD/GAREM1/TRAF7/IGF1R/GDF15/STK39/LPAR2/RIPK1/RAF1/TNF/BCAR3/MAP2K3/NPNT/TNIK/INSR	24
GO:0042552	myelination	11/580	158/18805	0.069620253164557	2.25725665648189	2.83108788468864	0.00998259678761505	0.157001867653937	0.138647645683906	CLU/CXCR4/TYMP/SERINC5/SBF2/PMP22/RAF1/TNF/EIF2AK3/BCAS1/ERBB3	11
GO:0030879	mammary gland development	10/580	137/18805	0.072992700729927	2.36659954694186	2.86390105488248	0.0100296194150175	0.157001867653937	0.138647645683906	PGR/CEBPB/ESR1/MED1/IGFBP5/NME1/LEF1/MSX2/NEURL1/AREG	10
GO:0045621	positive regulation of lymphocyte differentiation	10/580	137/18805	0.072992700729927	2.36659954694186	2.86390105488248	0.0100296194150175	0.157001867653937	0.138647645683906	AMBRA1/BRD2/BCL6/SOCS1/CYLD/LEF1/RHOH/SMARCC2/NFKBIZ/EGR3	10
GO:0045746	negative regulation of Notch signaling pathway	5/580	43/18805	0.116279069767442	3.77004811547715	3.24404839406497	0.0100431366380268	0.157001867653937	0.138647645683906	TSPAN15/BCL6/ARRDC1/NRARP/NEURL1	5
GO:0006999	nuclear pore organization	3/580	15/18805	0.2	6.48448275862069	3.79073359844936	0.0100691888945363	0.157001867653937	0.138647645683906	NUP98/SEH1L/FXR1	3
GO:0009209	pyrimidine ribonucleoside triphosphate biosynthetic process	3/580	15/18805	0.2	6.48448275862069	3.79073359844936	0.0100691888945363	0.157001867653937	0.138647645683906	NME1/CTPS2/UCK2	3
GO:0035865	cellular response to potassium ion	3/580	15/18805	0.2	6.48448275862069	3.79073359844936	0.0100691888945363	0.157001867653937	0.138647645683906	NEK7/STK39/SLC12A2	3
GO:0046512	sphingosine biosynthetic process	3/580	15/18805	0.2	6.48448275862069	3.79073359844936	0.0100691888945363	0.157001867653937	0.138647645683906	SPTSSA/SPTSSB/SPTLC2	3
GO:0046520	sphingoid biosynthetic process	3/580	15/18805	0.2	6.48448275862069	3.79073359844936	0.0100691888945363	0.157001867653937	0.138647645683906	SPTSSA/SPTSSB/SPTLC2	3
GO:0060347	heart trabecula formation	3/580	15/18805	0.2	6.48448275862069	3.79073359844936	0.0100691888945363	0.157001867653937	0.138647645683906	FKBP1A/FHL2/TGFBR3	3
GO:1901029	negative regulation of mitochondrial outer membrane permeabilization involved in apoptotic signaling pathway	3/580	15/18805	0.2	6.48448275862069	3.79073359844936	0.0100691888945363	0.157001867653937	0.138647645683906	IER3/HSPA1A/GCLC	3
GO:0060485	mesenchyme development	19/580	342/18805	0.0555555555555556	1.80124521072797	2.66767374400837	0.0101407635162312	0.157001867653937	0.138647645683906	PDCD6/MYC/EFNA1/SNAI1/EPB41L5/MESP1/EXOC4/BASP1/LEF1/PPP2CA/MSX2/SEMA3E/RBM24/ROBO2/POFUT2/YAP1/TGFBR3/EXT1/ERBB3	19
GO:0046390	ribose phosphate biosynthetic process	12/580	180/18805	0.0666666666666667	2.16149425287356	2.79325462555537	0.0101424423461787	0.157001867653937	0.138647645683906	ATP5MF/ATP5MG/NDUFC2/NDUFA11/NDUFA13/ATP5PO/NME1/CTPS2/SDHA/UCK2/NDUFB8/DCK	12
GO:0001702	gastrulation with mouth forming second	4/580	28/18805	0.142857142857143	4.63177339901478	3.43075737331065	0.0101855477806543	0.157001867653937	0.138647645683906	FRS2/UGDH/ETS2/LDB1	4
GO:0045116	protein neddylation	4/580	28/18805	0.142857142857143	4.63177339901478	3.43075737331065	0.0101855477806543	0.157001867653937	0.138647645683906	NEDD8/DCUN1D5/RNF7/COPS5	4
GO:0052372	modulation by symbiont of entry into host	4/580	28/18805	0.142857142857143	4.63177339901478	3.43075737331065	0.0101855477806543	0.157001867653937	0.138647645683906	EXOC2/TMPRSS2/LGALS1/CXCL8	4
GO:0032890	regulation of organic acid transport	7/580	78/18805	0.0897435897435897	2.90970380194518	3.01498085241801	0.0102369115575127	0.157001867653937	0.138647645683906	ARL6IP1/SLC38A2/ABAT/RGS2/SLC43A1/TNF/SLC12A2	7
GO:0043616	keratinocyte proliferation	6/580	60/18805	0.1	3.24224137931034	3.10327751932153	0.0102577734238843	0.157001867653937	0.138647645683906	ZFP36/MED1/OVOL1/YAP1/NFKBIZ/AREG	6
GO:0046324	regulation of D-glucose import	6/580	60/18805	0.1	3.24224137931034	3.10327751932153	0.0102577734238843	0.157001867653937	0.138647645683906	PEA15/IRS1/GPC3/TNF/INSR/PIK3R1	6
GO:0002366	leukocyte activation involved in immune response	18/580	319/18805	0.0564263322884013	1.8294778942817	2.66553281369852	0.0104607824629979	0.159436580428656	0.140797729623515	IL6ST/BRD2/PYCARD/BCL6/JUNB/SOCS3/MYB/VAMP2/LEF1/ZFPM1/FOXP1/HMCES/EXOSC6/LGALS1/PGLYRP2/NFKBIZ/TNF/PIK3R1	18
GO:0050867	positive regulation of cell activation	21/580	392/18805	0.0535714285714286	1.73691502463054	2.63028929678135	0.010486061182957	0.159436580428656	0.140797729623515	AMBRA1/IL6ST/IGFBP2/BRD2/PYCARD/BCL6/SOCS1/MYB/CYLD/LEF1/RHOH/HMCES/EXOSC6/LGALS1/SMARCC2/BLOC1S6/PELI1/NFKBIZ/TNF/EGR3/PPP3CA	21
GO:0071214	cellular response to abiotic stimulus	19/580	344/18805	0.0552325581395349	1.79077285485164	2.64063704967574	0.0107422862126658	0.162261352727053	0.143292273380339	EFHD1/RPL26/MYC/BAG3/SLC38A2/GADD45A/SPIDR/PYCARD/IGF1R/ITGB6/STK39/GCLC/RHBDD1/NFATC4/YAP1/TNF/NUCKS1/TSPYL5/PIK3R1	19
GO:0104004	cellular response to environmental stimulus	19/580	344/18805	0.0552325581395349	1.79077285485164	2.64063704967574	0.0107422862126658	0.162261352727053	0.143292273380339	EFHD1/RPL26/MYC/BAG3/SLC38A2/GADD45A/SPIDR/PYCARD/IGF1R/ITGB6/STK39/GCLC/RHBDD1/NFATC4/YAP1/TNF/NUCKS1/TSPYL5/PIK3R1	19
GO:0033209	tumor necrosis factor-mediated signaling pathway	9/580	118/18805	0.076271186440678	2.4728959672706	2.86317987968721	0.0108598437501266	0.163137176373424	0.144065709317237	PYDC1/PYCARD/HSPA1A/CYLD/RIPK1/HIPK1/TNF/EXT1/HSPA1B	9
GO:0007272	ensheathment of neurons	11/580	160/18805	0.06875	2.22904094827586	2.78516224694273	0.0109065010468884	0.163137176373424	0.144065709317237	CLU/CXCR4/TYMP/SERINC5/SBF2/PMP22/RAF1/TNF/EIF2AK3/BCAS1/ERBB3	11
GO:0008366	axon ensheathment	11/580	160/18805	0.06875	2.22904094827586	2.78516224694273	0.0109065010468884	0.163137176373424	0.144065709317237	CLU/CXCR4/TYMP/SERINC5/SBF2/PMP22/RAF1/TNF/EIF2AK3/BCAS1/ERBB3	11
GO:0046328	regulation of JNK cascade	10/580	139/18805	0.0719424460431655	2.33254775489953	2.81300109253573	0.0110388916385045	0.163212290479897	0.144132042248021	MECOM/TRAF4/GADD45A/PYCARD/IGF1R/CYLD/RIPK1/TNF/COPS5/TNIK	10
GO:0046627	negative regulation of insulin receptor signaling pathway	5/580	44/18805	0.113636363636364	3.68436520376176	3.18013309652581	0.0110504957705825	0.163212290479897	0.144132042248021	GRB14/SOCS3/SOCS1/PIP4K2B/IRS1	5
GO:0072528	pyrimidine-containing compound biosynthetic process	5/580	44/18805	0.113636363636364	3.68436520376176	3.18013309652581	0.0110504957705825	0.163212290479897	0.144132042248021	NME1/CTPS2/SLC19A2/UCK2/DCK	5
GO:0014009	glial cell proliferation	6/580	61/18805	0.0983606557377049	3.18908988128886	3.05494026587673	0.0110886578945534	0.163212290479897	0.144132042248021	CERS2/CLU/MYB/TNF/CDKN2B/AREG	6
GO:0060612	adipose tissue development	6/580	61/18805	0.0983606557377049	3.18908988128886	3.05494026587673	0.0110886578945534	0.163212290479897	0.144132042248021	ARRDC3/SLC25A25/FTO/DHRS7B/ARID5B/SPTLC2	6
GO:0050863	regulation of T cell activation	21/580	395/18805	0.0531645569620253	1.7237232649498	2.59328075356909	0.011356030804581	0.166184759264059	0.146757016109488	AMBRA1/IL6ST/CEBPB/PRDX2/IGFBP2/BRD2/PYCARD/BCL6/JUNB/SOCS1/CYLD/LEF1/RHOH/LGALS1/SMARCC2/KAT2A/PELI1/NRARP/NFKBIZ/EGR3/PPP3CA	21
GO:1901293	nucleoside phosphate biosynthetic process	18/580	322/18805	0.0559006211180124	1.8124330691797	2.62321958546349	0.0114355394714522	0.166184759264059	0.146757016109488	ATP5MF/ATP5MG/ACLY/ELOVL5/NDUFC2/UGDH/NDUFA11/NDUFA13/ATP5PO/NME1/MPC2/CTPS2/SDHA/UCK2/SLC27A2/NDUFB8/DCK/KYNU	18
GO:0048738	cardiac muscle tissue development	15/580	251/18805	0.0597609561752988	1.93759444978706	2.66770904922051	0.0114384806020954	0.166184759264059	0.146757016109488	FRS2/MED1/FKBP1A/SORBS2/MESP1/FHL2/ZFPM1/RGS2/FOXP1/PIM1/MSX2/KAT2A/YAP1/TGFBR3/ERBB3	15
GO:0003401	axis elongation	4/580	29/18805	0.137931034482759	4.47205707491082	3.3380256215227	0.0115330975225533	0.166184759264059	0.146757016109488	ESR1/MED1/YAP1/AREG	4
GO:2000319	regulation of T-helper 17 cell differentiation	4/580	29/18805	0.137931034482759	4.47205707491082	3.3380256215227	0.0115330975225533	0.166184759264059	0.146757016109488	BRD2/JUNB/LGALS1/NFKBIZ	4
GO:1904019	epithelial cell apoptotic process	7/580	80/18805	0.0875	2.83696120689655	2.93723987077331	0.011682975784398	0.166184759264059	0.146757016109488	ESR1/ZFP36/IGF1R/LEF1/TIA1/YAP1/NFKBIZ	7
GO:0062012	regulation of small molecule metabolic process	19/580	347/18805	0.0547550432276657	1.77529066878664	2.60041296736979	0.0116976683088566	0.166184759264059	0.146757016109488	IGFBP4/TFF3/PMAIP1/ELOVL5/NDUFC2/SNAI1/IER3/GDF15/ADM/MID1IP1/EIF6/PPP2CA/IRS1/KAT2A/FOXK2/FMO5/MFSD2A/TNF/INSR	19
GO:0006403	RNA localization	13/580	206/18805	0.0631067961165049	2.04607465684633	2.69312705689356	0.0117692857336711	0.166184759264059	0.146757016109488	ZFP36/HNRNPA1/G3BP2/NXF1/ALYREF/NUP62/NUP98/RBM15B/SEH1L/GLE1/XPO5/FXR1/CASC3	13
GO:0002263	cell activation involved in immune response	18/580	323/18805	0.0557275541795666	1.8068218212875	2.6092143801127	0.011776016357028	0.166184759264059	0.146757016109488	IL6ST/BRD2/PYCARD/BCL6/JUNB/SOCS3/MYB/VAMP2/LEF1/ZFPM1/FOXP1/HMCES/EXOSC6/LGALS1/PGLYRP2/NFKBIZ/TNF/PIK3R1	18
GO:0002696	positive regulation of leukocyte activation	20/580	372/18805	0.0537634408602151	1.74314052651094	2.58255603714943	0.0118708898696387	0.166184759264059	0.146757016109488	AMBRA1/IL6ST/IGFBP2/BRD2/PYCARD/BCL6/SOCS1/CYLD/LEF1/RHOH/HMCES/EXOSC6/LGALS1/SMARCC2/BLOC1S6/PELI1/NFKBIZ/TNF/EGR3/PPP3CA	20
GO:0009166	nucleotide catabolic process	11/580	162/18805	0.0679012345679012	2.20152192422307	2.73991226736323	0.0118945135204122	0.166184759264059	0.146757016109488	OGDH/IER3/EIF6/TYMP/NUDT4/PPP2CA/FOXK2/PDE7A/ENO2/INSR/CNP	11
GO:0043549	regulation of kinase activity	21/580	397/18805	0.052896725440806	1.71504	2.56878257271958	0.0119674755441876	0.166184759264059	0.146757016109488	CALM2/CDK12/TRAF4/JTB/EFNA1/RBL2/GADD45A/PYCARD/PREX1/SERTAD1/TSPYL2/LTF/CDKN1C/RGS2/PIM1/PPP2CA/LDB1/TNF/CDKN2B/MAP2K3/INSR	21
GO:0032355	response to estradiol	9/580	120/18805	0.075	2.43168103448276	2.80669805293626	0.0120394029488168	0.166184759264059	0.146757016109488	IGFBP2/ESR1/IGF1R/MSX2/ENDOG/MAP1B/ARPC1B/AREG/NRIP1	9
GO:0010273	detoxification of copper ion	3/580	16/18805	0.1875	6.0792025862069	3.62584339877797	0.0121130023530257	0.166184759264059	0.146757016109488	MT1X/MT1G/MT2A	3
GO:0032897	negative regulation of viral transcription	3/580	16/18805	0.1875	6.0792025862069	3.62584339877797	0.0121130023530257	0.166184759264059	0.146757016109488	ZFP36/HEXIM1/LARP7	3
GO:0046036	CTP metabolic process	3/580	16/18805	0.1875	6.0792025862069	3.62584339877797	0.0121130023530257	0.166184759264059	0.146757016109488	NME1/CTPS2/UCK2	3
GO:0061043	regulation of vascular wound healing	3/580	16/18805	0.1875	6.0792025862069	3.62584339877797	0.0121130023530257	0.166184759264059	0.146757016109488	CXCR4/TNF/SLC12A2	3
GO:1903897	regulation of PERK-mediated unfolded protein response	3/580	16/18805	0.1875	6.0792025862069	3.62584339877797	0.0121130023530257	0.166184759264059	0.146757016109488	PPP1R15A/AGR2/PPP1R15B	3
GO:1990169	stress response to copper ion	3/580	16/18805	0.1875	6.0792025862069	3.62584339877797	0.0121130023530257	0.166184759264059	0.146757016109488	MT1X/MT1G/MT2A	3
GO:1900077	negative regulation of cellular response to insulin stimulus	5/580	45/18805	0.111111111111111	3.60249042145594	3.11805900358554	0.0121246291591612	0.166184759264059	0.146757016109488	GRB14/SOCS3/SOCS1/PIP4K2B/IRS1	5
GO:0006754	ATP biosynthetic process	8/580	100/18805	0.08	2.59379310344828	2.85074542828772	0.0121563411920964	0.166184759264059	0.146757016109488	ATP5MF/ATP5MG/NDUFC2/NDUFA11/NDUFA13/ATP5PO/SDHA/NDUFB8	8
GO:0022404	molting cycle process	8/580	100/18805	0.08	2.59379310344828	2.85074542828772	0.0121563411920964	0.166184759264059	0.146757016109488	IGFBP5/SNAI1/TRPC4AP/MSX2/LDB1/TNF/FARP2/EXT1	8
GO:0022405	hair cycle process	8/580	100/18805	0.08	2.59379310344828	2.85074542828772	0.0121563411920964	0.166184759264059	0.146757016109488	IGFBP5/SNAI1/TRPC4AP/MSX2/LDB1/TNF/FARP2/EXT1	8
GO:0043648	dicarboxylic acid metabolic process	8/580	100/18805	0.08	2.59379310344828	2.85074542828772	0.0121563411920964	0.166184759264059	0.146757016109488	ACLY/OGDH/SDHA/GLS/GCLC/BLOC1S6/SLC46A1/KYNU	8
GO:0045785	positive regulation of cell adhesion	25/580	499/18805	0.0501002004008016	1.6243694285122	2.52174125567425	0.0123436415952469	0.168246026122197	0.14857731163385	AMBRA1/IL6ST/IGFBP2/JUP/BRD2/PYCARD/BCL6/EPB41L5/AGR2/PREX1/SOCS1/CYLD/FBLN2/LEF1/SKAP1/CEACAM6/RHOH/LDB1/LGALS1/SMARCC2/NFKBIZ/TNF/EGR3/PPP3CA/NPNT	25
GO:0071478	cellular response to radiation	12/580	185/18805	0.0648648648648649	2.10307548928239	2.68971713664946	0.0124172126300811	0.168749553353344	0.149021974274999	RPL26/MYC/GADD45A/SPIDR/ITGB6/RHBDD1/NFATC4/YAP1/TNF/NUCKS1/TSPYL5/PIK3R1	12
GO:0070897	transcription preinitiation complex assembly	7/580	81/18805	0.0864197530864197	2.80193699446573	2.89926654613888	0.0124588614303655	0.168817572381452	0.149082041573878	ESR1/MED1/MED14/BRF1/TAF9/NFKBIZ/TAF1B	7
GO:0042773	ATP synthesis coupled electron transport	8/580	101/18805	0.0792079207920792	2.56811198361215	2.81887529396068	0.0128576128559562	0.173146668769723	0.152905047192482	COX6A1/UQCR11/COX8A/NDUFC2/UQCRHL/SDHA/DNAJC15/NDUFB8	8
GO:0042775	mitochondrial ATP synthesis coupled electron transport	8/580	101/18805	0.0792079207920792	2.56811198361215	2.81887529396068	0.0128576128559562	0.173146668769723	0.152905047192482	COX6A1/UQCR11/COX8A/NDUFC2/UQCRHL/SDHA/DNAJC15/NDUFB8	8
GO:0043370	regulation of CD4-positive, alpha-beta T cell differentiation	6/580	63/18805	0.0952380952380952	3.08784893267652	2.96119310433019	0.0128911021028901	0.173146668769723	0.152905047192482	BRD2/BCL6/JUNB/SOCS1/LGALS1/NFKBIZ	6
GO:1902230	negative regulation of intrinsic apoptotic signaling pathway in response to DNA damage	4/580	30/18805	0.133333333333333	4.32298850574713	3.24941247243293	0.0129900244377935	0.17396814704917	0.153630490979412	SNAI1/CLU/TAF9/MUC1	4
GO:0048732	gland development	23/580	451/18805	0.0509977827050998	1.65347121339552	2.50584796361646	0.0131919189296266	0.176159914518231	0.155566031008411	PGR/CEBPB/PRDX2/FRS2/ESR1/MED1/IGFBP5/NME1/MESP1/MAFB/CDKN1C/LEF1/HOXB3/MSX2/RAF1/TNF/TGFBR3/CDKN2B/EXT1/NEURL1/AREG/INSR/ARID5B	23
GO:0060711	labyrinthine layer development	5/580	46/18805	0.108695652173913	3.52417541229385	3.05772874305051	0.0132674215628335	0.176656101560619	0.156004211561763	SPINT2/JUNB/SOCS3/ADM/LEF1	5
GO:0033108	mitochondrial respiratory chain complex assembly	9/580	122/18805	0.0737704918032787	2.39181741096665	2.75133975193823	0.0133119856688947	0.176738668520455	0.156077126073951	NDUFC2/NDUFA11/NDUFA13/COX14/HIGD2A/HIGD1A/NDUFB8/PET100/IMMP2L	9
GO:0016055	Wnt signaling pathway	24/580	477/18805	0.050314465408805	1.63131641726307	2.49146094749091	0.0133849236622379	0.177196388827385	0.156481336825618	KLF4/IGFBP4/IGFBP2/TPBG/JUP/SNAI1/AMFR/MESP1/CSNK2B/CYLD/LEF1/WWOX/LDB1/GPC3/NFATC4/ZBTB33/NRARP/YAP1/FRAT2/EXT1/CDK14/USP8/LEO1/TNIK	24
GO:0019827	stem cell population maintenance	12/580	187/18805	0.0641711229946524	2.08058270330076	2.64921772080762	0.0134293586865057	0.177275230569432	0.156550961614672	KLF4/MYC/KLF10/MED14/LDB1/KAT2A/SAP30/RAF1/YAP1/BICRAL/LEO1/HOOK3	12
GO:0045926	negative regulation of growth	14/580	233/18805	0.0600858369098712	1.94812786739677	2.59789075319056	0.0136483867128238	0.179222178287252	0.158270302418569	RERG/MT1X/IGFBP5/BCL6/GDF15/HSPA1A/TSPYL2/RGS2/FOXP1/GPC3/MT1G/OSGIN1/MT2A/HSPA1B	14
GO:0021537	telencephalon development	16/580	280/18805	0.0571428571428571	1.85270935960591	2.56452116028838	0.0136546526109888	0.179222178287252	0.158270302418569	SLC38A2/OGDH/IGF1R/TMEM14B/CXCR4/LEF1/FOXP1/ROBO2/BLOC1S6/SOCS7/DAB1/KAT2A/TRAPPC9/MFSD2A/EXT1/FXR1	16
GO:0034762	regulation of transmembrane transport	24/580	478/18805	0.0502092050209205	1.62790362141105	2.48065629837505	0.0136989454849088	0.179292732525497	0.158332608550157	CALM2/FXYD3/ARL6IP1/FKBP1A/KCNE4/SLC30A1/PEA15/STK39/VAMP2/RIPK1/RGS2/KCNC2/PIM1/IRS1/GPC3/LRRC26/CA2/SLC43A1/TNF/HTT/PPP3CA/CYBA/INSR/PIK3R1	24
GO:0009410	response to xenobiotic stimulus	23/580	453/18805	0.0507726269315673	1.64617111973814	2.48347786678399	0.0138374751140419	0.179934707979157	0.158899534196119	GSTM3/IGFBP2/EPHX1/MYC/FOSB/ADD3/TGIF1/CRYZ/ABAT/TFAP2B/VKORC1/CXCR4/GCLC/CCNO/BLOC1S6/GNA12/COL18A1/FMO5/MAP1B/NFKBIZ/TNF/BCAR3/DUSP6	23
GO:0045058	T cell selection	6/580	64/18805	0.09375	3.03960129310345	2.9157093856669	0.0138651663409162	0.179934707979157	0.158899534196119	IL6ST/BRD2/SOCS3/CYLD/ZFPM1/LGALS1	6
GO:0045620	negative regulation of lymphocyte differentiation	6/580	64/18805	0.09375	3.03960129310345	2.9157093856669	0.0138651663409162	0.179934707979157	0.158899534196119	PRDX2/BCL6/SOCS1/LGALS1/PGLYRP2/NRARP	6
GO:0001701	in utero embryonic development	21/580	403/18805	0.0521091811414392	1.68950543338752	2.49610616114103	0.013961058718685	0.180670217744331	0.159549059573381	CEBPB/SPINT2/KLF4/MED1/PCGF2/SNAI1/EPB41L5/JUNB/SLC30A1/SOCS3/ADM/KLF2/CDKN1C/LEF1/OCRL/ENDOG/KAT2A/GNA12/SLC39A1/YAP1/KRT19	21
GO:0046323	D-glucose import	7/580	83/18805	0.0843373493975904	2.73442044038222	2.82502736084321	0.0141207946576605	0.182005160786845	0.16072794179136	PEA15/ZDHHC7/IRS1/GPC3/TNF/INSR/PIK3R1	7
GO:0034764	positive regulation of transmembrane transport	13/580	211/18805	0.0616113744075829	1.99758947540448	2.59963288777001	0.014143227167721	0.182005160786845	0.16072794179136	CALM2/FXYD3/ARL6IP1/STK39/KCNC2/IRS1/GPC3/LRRC26/CA2/HTT/PPP3CA/INSR/PIK3R1	13
GO:0030728	ovulation	3/580	17/18805	0.176470588235294	5.72160243407708	3.47439307325528	0.0143770584165892	0.183476753809491	0.162027498994364	PGR/IMMP2L/NRIP1	3
GO:0071243	cellular response to arsenic-containing substance	3/580	17/18805	0.176470588235294	5.72160243407708	3.47439307325528	0.0143770584165892	0.183476753809491	0.162027498994364	HNRNPA1/SLC38A2/ZFAND2A	3
GO:1902165	regulation of intrinsic apoptotic signaling pathway in response to DNA damage by p53 class mediator	3/580	17/18805	0.176470588235294	5.72160243407708	3.47439307325528	0.0143770584165892	0.183476753809491	0.162027498994364	RPL26/TAF9/MUC1	3
GO:0033173	calcineurin-NFAT signaling cascade	5/580	47/18805	0.106382978723404	3.44919295671313	2.99905212854643	0.0144806864403214	0.183610387564799	0.162145510364765	FHL2/NFATC4/TNF/PPP3CA/ERBB3	5
GO:0042771	intrinsic apoptotic signaling pathway in response to DNA damage by p53 class mediator	5/580	47/18805	0.106382978723404	3.44919295671313	2.99905212854643	0.0144806864403214	0.183610387564799	0.162145510364765	RPL26/PYCARD/HIPK1/TAF9/MUC1	5
GO:0048193	Golgi vesicle transport	17/580	306/18805	0.0555555555555556	1.80124521072797	2.52091024487891	0.0145070937863223	0.183610387564799	0.162145510364765	PDCD6/NAPA/YKT6/KDELR2/RAB13/EXOC2/RABGGTB/EXOC4/NSF/TRAPPC10/VAMP2/IER3IP1/BCAP29/TRAPPC9/HTT/MYO18A/TRAPPC1	17
GO:0060964	regulation of miRNA-mediated gene silencing	4/580	31/18805	0.129032258064516	4.18353726362625	3.1645920111038	0.0145591685674255	0.183764629014052	0.162281720297331	ZFP36/RIPK1/HOXB-AS3/FXR1	4
GO:0019722	calcium-mediated signaling	14/580	235/18805	0.0595744680851064	1.93154805575935	2.56353111195302	0.0146079918465023	0.183877099554197	0.162381042527269	CALM2/FKBP1A/CXCR4/TMBIM4/FHL2/NUDT4/NFATC4/CXCL8/TNF/EIF2AK3/HTT/PPP3CA/ITPR2/ERBB3	14
GO:0006413	translational initiation	9/580	124/18805	0.0725806451612903	2.35323971078977	2.69706159913597	0.0146817097248341	0.184301462404116	0.162755795458149	PPP1R15A/EIF6/YTHDF3/EIF2D/TNF/EIF2AK3/EIF5B/RPS3A/COPS5	9
GO:0045428	regulation of nitric oxide biosynthetic process	6/580	65/18805	0.0923076923076923	2.99283819628647	2.8711063071845	0.0148894164449499	0.186400928157294	0.164609824255524	KLF4/ESR1/CLU/KLF2/TNF/INSR	6
GO:0051952	regulation of amine transport	7/580	84/18805	0.0833333333333333	2.70186781609195	2.78872889376336	0.0150085896199662	0.187383664984239	0.165477674743031	ARL6IP1/SLC38A2/ABAT/RGS2/SLC43A1/TNF/SLC12A2	7
GO:0007565	female pregnancy	12/580	190/18805	0.0631578947368421	2.04773139745917	2.58940861391809	0.0150641856869182	0.187569468809817	0.165641757268674	PGR/IGFBP2/ESR1/MED1/SLC38A2/IGFBP5/FOSB/LDOC1/JUNB/ADM/YTHDF3/RGS2	12
GO:0051090	regulation of DNA-binding transcription factor activity	18/580	332/18805	0.0542168674698795	1.75784171167428	2.48533068290668	0.0152148891444236	0.188935294577788	0.166847911883096	ESR1/JUP/PYCARD/HSPA1A/S100A8/CLU/CYLD/LTF/S100A9/HES6/RIPK1/RIPK4/PIM1/TNF/RTKN2/COPS5/HSPA1B/ARID5B	18
GO:0001952	regulation of cell-matrix adhesion	9/580	125/18805	0.072	2.33441379310345	2.67031467504769	0.0154042750231448	0.190772836106527	0.168470636571745	JUP/BCL6/EPB41L5/SKAP1/CEACAM6/LDB1/SEMA3E/PIK3R1/LIMCH1	9
GO:0009267	cellular response to starvation	12/580	191/18805	0.06282722513089	2.03701029066618	2.56971668556158	0.0156413540500132	0.192665	0.170141612578418	AMBRA1/PMAIP1/HNRNPA1/SLC38A2/KLF10/IGF1R/MAP1LC3B2/DNAJC15/SEH1L/WDR24/MFSD2A/EIF2AK3	12
GO:0098727	maintenance of cell number	12/580	191/18805	0.06282722513089	2.03701029066618	2.56971668556158	0.0156413540500132	0.192665	0.170141612578418	KLF4/MYC/KLF10/MED14/LDB1/KAT2A/SAP30/RAF1/YAP1/BICRAL/LEO1/HOOK3	12
GO:0010837	regulation of keratinocyte proliferation	5/580	48/18805	0.104166666666667	3.37733477011494	2.94194548773943	0.0157661626248281	0.192665	0.170141612578418	ZFP36/MED1/OVOL1/YAP1/AREG	5
GO:0033120	positive regulation of RNA splicing	5/580	48/18805	0.104166666666667	3.37733477011494	2.94194548773943	0.0157661626248281	0.192665	0.170141612578418	SLC38A2/HSPA1A/POLR2A/NUP98/PIK3R1	5
GO:0061383	trabecula morphogenesis	5/580	48/18805	0.104166666666667	3.37733477011494	2.94194548773943	0.0157661626248281	0.192665	0.170141612578418	MED1/FKBP1A/FHL2/MSX2/TGFBR3	5
GO:0050870	positive regulation of T cell activation	15/580	261/18805	0.0574712643678161	1.86335711454618	2.50561514873147	0.0158408394740018	0.193065469462239	0.170495250813191	AMBRA1/IL6ST/IGFBP2/BRD2/PYCARD/BCL6/SOCS1/CYLD/LEF1/RHOH/LGALS1/SMARCC2/NFKBIZ/EGR3/PPP3CA	15
GO:0045744	negative regulation of G protein-coupled receptor signaling pathway	6/580	66/18805	0.0909090909090909	2.9474921630094	2.82735167252546	0.0159650339123475	0.194065728850092	0.171378575395704	CRTC3/ARRDC3/ADM/RGS2/CXCL8/PPP3CA	6
GO:0046685	response to arsenic-containing substance	4/580	32/18805	0.125	4.05280172413793	3.08327383121537	0.016243134673671	0.195384129090346	0.172542848739147	HNRNPA1/SLC38A2/ZFAND2A/GCLC	4
GO:0051085	chaperone cofactor-dependent protein refolding	4/580	32/18805	0.125	4.05280172413793	3.08327383121537	0.016243134673671	0.195384129090346	0.172542848739147	HSPE1/HSPA1A/HSPA2/HSPA1B	4
GO:0060325	face morphogenesis	4/580	32/18805	0.125	4.05280172413793	3.08327383121537	0.016243134673671	0.195384129090346	0.172542848739147	TIPARP/LEF1/CSRNP1/ARID5B	4
GO:1900368	regulation of post-transcriptional gene silencing by regulatory ncRNA	4/580	32/18805	0.125	4.05280172413793	3.08327383121537	0.016243134673671	0.195384129090346	0.172542848739147	ZFP36/RIPK1/HOXB-AS3/FXR1	4
GO:1901796	regulation of signal transduction by p53 class mediator	8/580	106/18805	0.0754716981132075	2.4469746258946	2.66507850655425	0.0168147202816979	0.198197207591754	0.175027065756258	RPL26/PMAIP1/MYC/HEXIM1/SNAI1/EEF1E1/TAF9/MUC1	8
GO:0003128	heart field specification	3/580	18/18805	0.166666666666667	5.40373563218391	3.33452611978737	0.0168641861028799	0.198197207591754	0.175027065756258	MESP1/ROBO2/EXT1	3
GO:0003159	morphogenesis of an endothelium	3/580	18/18805	0.166666666666667	5.40373563218391	3.33452611978737	0.0168641861028799	0.198197207591754	0.175027065756258	CSNK2B/CXCR4/FOXP1	3
GO:0009208	pyrimidine ribonucleoside triphosphate metabolic process	3/580	18/18805	0.166666666666667	5.40373563218391	3.33452611978737	0.0168641861028799	0.198197207591754	0.175027065756258	NME1/CTPS2/UCK2	3
GO:0035973	aggrephagy	3/580	18/18805	0.166666666666667	5.40373563218391	3.33452611978737	0.0168641861028799	0.198197207591754	0.175027065756258	BAG3/HSPB8/HTT	3
GO:0043923	positive regulation by host of viral transcription	3/580	18/18805	0.166666666666667	5.40373563218391	3.33452611978737	0.0168641861028799	0.198197207591754	0.175027065756258	CDK9/LEF1/NUCKS1	3
GO:0061154	endothelial tube morphogenesis	3/580	18/18805	0.166666666666667	5.40373563218391	3.33452611978737	0.0168641861028799	0.198197207591754	0.175027065756258	CSNK2B/CXCR4/FOXP1	3
GO:0071895	odontoblast differentiation	3/580	18/18805	0.166666666666667	5.40373563218391	3.33452611978737	0.0168641861028799	0.198197207591754	0.175027065756258	CEBPB/LEF1/MAP1B	3
GO:1902065	response to L-glutamate	3/580	18/18805	0.166666666666667	5.40373563218391	3.33452611978737	0.0168641861028799	0.198197207591754	0.175027065756258	IGF1R/TAF9/TNF	3
GO:0022612	gland morphogenesis	9/580	127/18805	0.0708661417322835	2.29765137116481	2.61758054694873	0.0169273326951174	0.198433134163883	0.175235411454745	PGR/CEBPB/FRS2/ESR1/MED1/IGFBP5/MSX2/TNF/AREG	9
GO:0080164	regulation of nitric oxide metabolic process	6/580	67/18805	0.0895522388059701	2.90349974266598	2.78441494442121	0.0170931685605113	0.198733578332273	0.175500732353337	KLF4/ESR1/CLU/KLF2/TNF/INSR	6
GO:0006458	'de novo' protein folding	5/580	49/18805	0.102040816326531	3.30840957072484	2.88633106596225	0.0171255113084246	0.198733578332273	0.175500732353337	HSPE1/FKBP1A/HSPA1A/HSPA2/HSPA1B	5
GO:0045622	regulation of T-helper cell differentiation	5/580	49/18805	0.102040816326531	3.30840957072484	2.88633106596225	0.0171255113084246	0.198733578332273	0.175500732353337	BRD2/BCL6/JUNB/LGALS1/NFKBIZ	5
GO:1902041	regulation of extrinsic apoptotic signaling pathway via death domain receptors	5/580	49/18805	0.102040816326531	3.30840957072484	2.88633106596225	0.0171255113084246	0.198733578332273	0.175500732353337	PMAIP1/PEA15/FAF1/RAF1/BMPR1B	5
GO:0007162	negative regulation of cell adhesion	17/580	312/18805	0.0544871794871795	1.76660587975243	2.43585317881848	0.0172258146951633	0.198993801445993	0.175730534218812	CEBPB/SPINT2/PRDX2/KLF4/BCL6/EPB41L5/SOCS1/RND1/CLDN7/SEMA3E/LGALS1/DAB1/PELI1/NRARP/MUC1/PIK3R1/ERBB3	17
GO:0008406	gonad development	14/580	240/18805	0.0583333333333333	1.89130747126437	2.47908284775623	0.0172343231554051	0.198993801445993	0.175730534218812	PGR/CEBPB/ESR1/RAB13/TIPARP/TNFSF10/BASP1/ROBO2/IMMP2L/BIK/BMPR1B/NRIP1/INSR/ARID5B	14
GO:0072522	purine-containing compound biosynthetic process	15/580	264/18805	0.0568181818181818	1.84218260188088	2.45836860688425	0.0173878858423185	0.200009738371597	0.17662770356465	ATP5MF/ATP5MG/ACLY/ELOVL5/NDUFC2/NDUFA11/NDUFA13/ATP5PO/NME1/MPC2/SDHA/SLC27A2/NDUFB8/DCK/KYNU	15
GO:0022409	positive regulation of cell-cell adhesion	18/580	337/18805	0.0534124629080119	1.73176097411235	2.4181298117109	0.0174390367414537	0.200009738371597	0.17662770356465	AMBRA1/IL6ST/IGFBP2/BRD2/PYCARD/BCL6/SOCS1/CYLD/LEF1/SKAP1/CEACAM6/RHOH/LGALS1/SMARCC2/NFKBIZ/TNF/EGR3/PPP3CA	18
GO:0051338	regulation of transferase activity	23/580	463/18805	0.0496760259179266	1.61061666790795	2.37323724534141	0.0174525536846933	0.200009738371597	0.17662770356465	CALM2/CDK12/TRAF4/JTB/ZFP36/EFNA1/RBL2/GADD45A/PYCARD/PREX1/SERTAD1/ARRDC3/TSPYL2/LTF/CDKN1C/RGS2/PIM1/PPP2CA/LDB1/TNF/CDKN2B/MAP2K3/INSR	23
GO:0045639	positive regulation of myeloid cell differentiation	8/580	107/18805	0.0747663551401869	2.42410570415727	2.63537175278115	0.0177008028199117	0.200797220479735	0.177323125485058	MED1/KLF10/HSPA1A/LEF1/RIPK1/TNF/PPP3CA/HSPA1B	8
GO:1990823	response to leukemia inhibitory factor	8/580	107/18805	0.0747663551401869	2.42410570415727	2.63537175278115	0.0177008028199117	0.200797220479735	0.177323125485058	KLF4/SOCS3/TEX14/BCLAF1/EEF1E1/NEFH/EXT1/ARID5B	8
GO:0030900	forebrain development	21/580	413/18805	0.0508474576271186	1.64859731151373	2.37761230873265	0.0178602230897336	0.200797220479735	0.177323125485058	FRS2/SLC38A2/OGDH/IGF1R/TMEM14B/CXCR4/LEF1/FOXP1/KCNC2/SEMA3E/ROBO2/BLOC1S6/SOCS7/DAB1/KAT2A/TRAPPC9/MFSD2A/EXT1/FXR1/CNP/HOOK3	21
GO:0007492	endoderm development	7/580	87/18805	0.0804597701149425	2.60869996036465	2.68293595407999	0.0179094878214354	0.200797220479735	0.177323125485058	DUSP5/EPB41L5/MESP1/DUSP2/EXT1/LEO1/DUSP4	7
GO:0052547	regulation of peptidase activity	7/580	87/18805	0.0804597701149425	2.60869996036465	2.68293595407999	0.0179094878214354	0.200797220479735	0.177323125485058	EFNA1/ATP13A2/CSTB/PSENEN/TIMP3/CSTA/ECM1	7
GO:0009218	pyrimidine ribonucleotide metabolic process	4/580	33/18805	0.121212121212121	3.92998955067921	3.00519818746994	0.0180442911392686	0.200797220479735	0.177323125485058	NME1/CTPS2/UCK2/DCK	4
GO:0030511	positive regulation of transforming growth factor beta receptor signaling pathway	4/580	33/18805	0.121212121212121	3.92998955067921	3.00519818746994	0.0180442911392686	0.200797220479735	0.177323125485058	CDKN1C/TGFBR3/CDKN2B/NPNT	4
GO:0031128	developmental induction	4/580	33/18805	0.121212121212121	3.92998955067921	3.00519818746994	0.0180442911392686	0.200797220479735	0.177323125485058	FRS2/MESP1/HIPK1/ROBO2	4
GO:0060147	regulation of post-transcriptional gene silencing	4/580	33/18805	0.121212121212121	3.92998955067921	3.00519818746994	0.0180442911392686	0.200797220479735	0.177323125485058	ZFP36/RIPK1/HOXB-AS3/FXR1	4
GO:0060795	cell fate commitment involved in formation of primary germ layer	4/580	33/18805	0.121212121212121	3.92998955067921	3.00519818746994	0.0180442911392686	0.200797220479735	0.177323125485058	KLF4/MESP1/ETS2/LEO1	4
GO:0061384	heart trabecula morphogenesis	4/580	33/18805	0.121212121212121	3.92998955067921	3.00519818746994	0.0180442911392686	0.200797220479735	0.177323125485058	MED1/FKBP1A/FHL2/TGFBR3	4
GO:1903846	positive regulation of cellular response to transforming growth factor beta stimulus	4/580	33/18805	0.121212121212121	3.92998955067921	3.00519818746994	0.0180442911392686	0.200797220479735	0.177323125485058	CDKN1C/TGFBR3/CDKN2B/NPNT	4
GO:0048608	reproductive structure development	17/580	314/18805	0.054140127388535	1.75535361300242	2.40791019295563	0.01821461334119	0.202204153404487	0.178565581645401	PGR/CEBPB/FRS2/ESR1/RAB13/TIPARP/TNFSF10/CDKN1C/BASP1/ROBO2/SYCP2/IMMP2L/BIK/BMPR1B/NRIP1/INSR/ARID5B	17
GO:0060760	positive regulation of response to cytokine stimulus	6/580	68/18805	0.0882352941176471	2.86080121703854	2.74226713556713	0.0182749367882626	0.202386138902706	0.178726292223267	MED1/HSPA1A/CXCR4/RIPK1/TAF9/HSPA1B	6
GO:0030521	androgen receptor signaling pathway	5/580	50/18805	0.1	3.24224137931034	2.83213649542797	0.0185603133301858	0.204458584458116	0.18055645960509	SCGB2A2/FOXP1/ZDHHC7/SCGB2A1/PMEPA1	5
GO:0046686	response to cadmium ion	5/580	50/18805	0.1	3.24224137931034	2.83213649542797	0.0185603133301858	0.204458584458116	0.18055645960509	MT1X/SLC30A1/GCLC/MT1G/MT2A	5
GO:0046777	protein autophosphorylation	11/580	173/18805	0.0635838150289017	2.0615407614112	2.5022767366833	0.0185952131295747	0.204458584458116	0.18055645960509	CALM2/CDK12/ATP13A2/IGF1R/STK39/RIPK1/PIM1/MOB1B/EIF2AK3/TNIK/INSR	11
GO:0016049	cell growth	24/580	492/18805	0.0487804878048781	1.58158116063919	2.33194596586632	0.0187453628984017	0.205618778268897	0.181581021559706	IGFBP4/RERG/IGFBP5/BCL6/EPB41L5/DCUN1D5/SORBS2/HSPA1A/S100A8/ALCAM/CXCR4/TSPYL2/S100A9/RGS2/FOXP1/NANOS1/MEX3C/YAP1/ITSN2/MAP1B/MFSD2A/OSGIN1/EXT1/HSPA1B	24
GO:0006913	nucleocytoplasmic transport	18/580	340/18805	0.0529411764705882	1.71648073022312	2.3783439785728	0.0188898173607732	0.206221299955171	0.18211310576051	HNRNPA1/JUP/MED1/BAG3/IER3/EIF6/NXF1/ALYREF/NUP62/NUP98/RBM15B/SEH1L/GLE1/XPO5/FRAT2/CASC3/PPP3CA/PIK3R1	18
GO:0051169	nuclear transport	18/580	340/18805	0.0529411764705882	1.71648073022312	2.3783439785728	0.0188898173607732	0.206221299955171	0.18211310576051	HNRNPA1/JUP/MED1/BAG3/IER3/EIF6/NXF1/ALYREF/NUP62/NUP98/RBM15B/SEH1L/GLE1/XPO5/FRAT2/CASC3/PPP3CA/PIK3R1	18
GO:0043161	proteasome-mediated ubiquitin-dependent protein catabolic process	23/580	467/18805	0.0492505353319058	1.59682123606291	2.32987206052249	0.0190915490519367	0.207930890029013	0.183622837092785	AMBRA1/TRAF4/SUMO2/PSMB3/PSMA2/FBXL20/PSMA1/RNF7/CSNK2B/HSPA1A/CLU/TRPC4AP/FAF1/ZFAND2A/GCLC/KLHL7/SOCS7/GNA12/KLHL11/PELI1/TAF9/PSMC1/HSPA1B	23
GO:0009154	purine ribonucleotide catabolic process	9/580	130/18805	0.0692307692307692	2.24462864721485	2.54030880325521	0.0194141696050625	0.210945941911611	0.186285415897633	OGDH/IER3/EIF6/NUDT4/PPP2CA/FOXK2/PDE7A/ENO2/INSR	9
GO:0061180	mammary gland epithelium development	6/580	69/18805	0.0869565217391304	2.81934032983508	2.70088070817308	0.0195114199285767	0.211212823746938	0.186521098050316	PGR/CEBPB/ESR1/MED1/MSX2/AREG	6
GO:0009148	pyrimidine nucleoside triphosphate biosynthetic process	3/580	19/18805	0.157894736842105	5.11932849364791	3.20472978641927	0.0195762699674284	0.211212823746938	0.186521098050316	NME1/CTPS2/UCK2	3
GO:0046931	pore complex assembly	3/580	19/18805	0.157894736842105	5.11932849364791	3.20472978641927	0.0195762699674284	0.211212823746938	0.186521098050316	PLEKHA7/NUP98/FXR1	3
GO:0006221	pyrimidine nucleotide biosynthetic process	4/580	34/18805	0.117647058823529	3.81440162271805	2.93013193479817	0.0199647699030026	0.212911330886882	0.188021042093336	NME1/CTPS2/UCK2/DCK	4
GO:0060055	angiogenesis involved in wound healing	4/580	34/18805	0.117647058823529	3.81440162271805	2.93013193479817	0.0199647699030026	0.212911330886882	0.188021042093336	PRCP/CXCR4/TNF/SLC12A2	4
GO:0060914	heart formation	4/580	34/18805	0.117647058823529	3.81440162271805	2.93013193479817	0.0199647699030026	0.212911330886882	0.188021042093336	MESP1/PIM1/ROBO2/EXT1	4
GO:0060966	regulation of gene silencing by regulatory ncRNA	4/580	34/18805	0.117647058823529	3.81440162271805	2.93013193479817	0.0199647699030026	0.212911330886882	0.188021042093336	ZFP36/RIPK1/HOXB-AS3/FXR1	4
GO:1902253	regulation of intrinsic apoptotic signaling pathway by p53 class mediator	4/580	34/18805	0.117647058823529	3.81440162271805	2.93013193479817	0.0199647699030026	0.212911330886882	0.188021042093336	RPL26/MYC/TAF9/MUC1	4
GO:0045137	development of primary sexual characteristics	14/580	245/18805	0.0571428571428571	1.85270935960591	2.39662693405328	0.0202061713941713	0.214492699569003	0.189417541689236	PGR/CEBPB/ESR1/RAB13/TIPARP/TNFSF10/BASP1/ROBO2/IMMP2L/BIK/BMPR1B/NRIP1/INSR/ARID5B	14
GO:0072593	reactive oxygen species metabolic process	14/580	245/18805	0.0571428571428571	1.85270935960591	2.39662693405328	0.0202061713941713	0.214492699569003	0.189417541689236	PRDX2/PMAIP1/NDUFC2/PRCP/GADD45A/IER3/PREX1/EIF6/RIPK1/NNT/IMMP2L/PXDNL/TNF/CYBA	14
GO:0045471	response to ethanol	9/580	131/18805	0.0687022900763359	2.22749407738879	2.51502163580257	0.0202989952819159	0.214742659141763	0.189638279867688	FOSB/IGF1R/ABAT/S100A8/CLDN7/RGS2/KCNC2/TNF/ITPR2	9
GO:0061458	reproductive system development	17/580	318/18805	0.0534591194968553	1.73327369334201	2.35262004824036	0.0203229432137636	0.214742659141763	0.189638279867688	PGR/CEBPB/FRS2/ESR1/RAB13/TIPARP/TNFSF10/CDKN1C/BASP1/ROBO2/SYCP2/IMMP2L/BIK/BMPR1B/NRIP1/INSR/ARID5B	17
GO:0043604	amide biosynthetic process	11/580	176/18805	0.0625	2.02640086206897	2.4405287056901	0.0208321591785412	0.219118167432738	0.193502271629564	SPTSSA/ACLY/ELOVL5/CERS2/SPTSSB/MPC2/PAM/GCLC/SLC27A2/BLOC1S6/SPTLC2	11
GO:0051701	biological process involved in interaction with host	11/580	176/18805	0.0625	2.02640086206897	2.4405287056901	0.0208321591785412	0.219118167432738	0.193502271629564	EXOC2/ITGB6/HSPA1A/CXCR4/LTF/TMPRSS2/LGALS1/PGLYRP2/CXCL8/HSPA1B/INSR	11
GO:0045859	regulation of protein kinase activity	19/580	369/18805	0.0514905149051491	1.6694467806747	2.31686772831379	0.0209329290375957	0.219676546870623	0.19399537400865	CALM2/CDK12/TRAF4/JTB/EFNA1/GADD45A/PYCARD/PREX1/SERTAD1/TSPYL2/LTF/CDKN1C/RGS2/PIM1/PPP2CA/TNF/CDKN2B/MAP2K3/INSR	19
GO:0032434	regulation of proteasomal ubiquitin-dependent protein catabolic process	9/580	132/18805	0.0681818181818182	2.21061912225705	2.4899624402448	0.0212125553288304	0.221522674153237	0.195625680738067	SUMO2/CSNK2B/HSPA1A/CLU/ZFAND2A/GCLC/GNA12/TAF9/HSPA1B	9
GO:0072659	protein localization to plasma membrane	16/580	295/18805	0.0542372881355932	1.75850379894798	2.34245312225221	0.0212266479112049	0.221522674153237	0.195625680738067	TPBG/JUP/TSPAN15/RAMP1/AGR2/RAB13/ZDHHC5/NSF/VAMP2/PACS2/SKAP1/ZDHHC7/EHD1/TNF/TNIK/PIK3R1	16
GO:0008544	epidermis development	20/580	395/18805	0.0506329113924051	1.6416412047141	2.29916028331266	0.0213011818211166	0.221522674153237	0.195625680738067	KLF4/ZFP36/MED1/S100A7/IGFBP5/SNAI1/KRT7/CALML5/OVOL1/TRPC4AP/MAFB/MSX2/LDB1/CSTA/YAP1/NFKBIZ/TNF/EXT1/PPP3CA/INSR	20
GO:0045089	positive regulation of innate immune response	20/580	395/18805	0.0506329113924051	1.6416412047141	2.29916028331266	0.0213011818211166	0.221522674153237	0.195625680738067	ESR1/HEXIM1/MED1/PYCARD/HSPA1A/S100A8/CYLD/NEK7/ZDHHC5/LTF/S100A9/PPP2CA/PELI1/TSPAN6/NFKBIZ/TNF/ZCCHC3/CYBA/HSPA1B/PIK3R1	20
GO:0016032	viral process	21/580	421/18805	0.0498812351543943	1.61727004668687	2.28508097724044	0.0215541369508606	0.222726902387815	0.196689129294987	OAZ1/ZFP36/HEXIM1/ITGB6/CSNK2B/MX1/HSPA1A/CXCR4/LTF/CDK9/TMPRSS2/LEF1/MGAT2/EIF2D/LGALS1/LARP7/CXCL8/TNF/NUCKS1/HSPA1B/INSR	21
GO:0003197	endocardial cushion development	5/580	52/18805	0.0961538461538462	3.11753978779841	2.72774157998469	0.0216621847811292	0.222726902387815	0.196689129294987	SNAI1/MSX2/RBM24/ROBO2/ERBB3	5
GO:0010171	body morphogenesis	5/580	52/18805	0.0961538461538462	3.11753978779841	2.72774157998469	0.0216621847811292	0.222726902387815	0.196689129294987	TIPARP/LEF1/GPC3/CSRNP1/ARID5B	5
GO:0042311	vasodilation	5/580	52/18805	0.0961538461538462	3.11753978779841	2.72774157998469	0.0216621847811292	0.222726902387815	0.196689129294987	KLF2/RGS2/BLOC1S6/TNF/EXT1	5
GO:0089718	amino acid import across plasma membrane	5/580	52/18805	0.0961538461538462	3.11753978779841	2.72774157998469	0.0216621847811292	0.222726902387815	0.196689129294987	ARL6IP1/SLC38A2/RGS2/SLC43A1/TNF	5
GO:0010720	positive regulation of cell development	22/580	447/18805	0.0492170022371365	1.59573401218854	2.27404379467238	0.0217070499613912	0.222726902387815	0.196689129294987	AMBRA1/IL6ST/KLF10/BRD2/BCL6/SLC30A1/SOCS1/MYB/CXCR4/CYLD/LEF1/RIPK1/RHOH/ROBO2/SMARCC2/MAP1B/NFKBIZ/TNF/EGR3/NEURL1/FXR1/PPP3CA	22
GO:1904893	negative regulation of receptor signaling pathway via STAT	4/580	35/18805	0.114285714285714	3.70541871921182	2.85786510759146	0.0220064673353987	0.225065774529812	0.198754576801371	SOCS3/SOCS1/LEPROT/DAB1	4
GO:0010810	regulation of cell-substrate adhesion	13/580	224/18805	0.0580357142857143	1.88165794334975	2.36807221246809	0.0220327033455492	0.225065774529812	0.198754576801371	JUP/BCL6/EPB41L5/AGR2/PREX1/FBLN2/SKAP1/CEACAM6/LDB1/SEMA3E/NPNT/PIK3R1/LIMCH1	13
GO:0098773	skin epidermis development	9/580	133/18805	0.0676691729323308	2.19399792584911	2.46512713955077	0.0221553167611297	0.225817575925939	0.199418489244914	KLF4/IGFBP5/SNAI1/TRPC4AP/MSX2/LDB1/NFKBIZ/TNF/EXT1	9
GO:0007351	tripartite regional subdivision	3/580	20/18805	0.15	4.86336206896552	3.08375707725246	0.022514322605819	0.225982527688356	0.199564157407034	FRS2/BASP1/TDRKH	3
GO:0008595	anterior/posterior axis specification, embryo	3/580	20/18805	0.15	4.86336206896552	3.08375707725246	0.022514322605819	0.225982527688356	0.199564157407034	FRS2/BASP1/TDRKH	3
GO:0034244	negative regulation of transcription elongation by RNA polymerase II	3/580	20/18805	0.15	4.86336206896552	3.08375707725246	0.022514322605819	0.225982527688356	0.199564157407034	HEXIM1/SUPT4H1/LARP7	3
GO:0046782	regulation of viral transcription	3/580	20/18805	0.15	4.86336206896552	3.08375707725246	0.022514322605819	0.225982527688356	0.199564157407034	ZFP36/HEXIM1/LARP7	3
GO:0070886	positive regulation of calcineurin-NFAT signaling cascade	3/580	20/18805	0.15	4.86336206896552	3.08375707725246	0.022514322605819	0.225982527688356	0.199564157407034	TNF/PPP3CA/ERBB3	3
GO:0106058	positive regulation of calcineurin-mediated signaling	3/580	20/18805	0.15	4.86336206896552	3.08375707725246	0.022514322605819	0.225982527688356	0.199564157407034	TNF/PPP3CA/ERBB3	3
GO:0050767	regulation of neurogenesis	19/580	372/18805	0.0510752688172043	1.65598350018539	2.27966863364066	0.022536864484743	0.225982527688356	0.199564157407034	IL6ST/CERS2/SLC30A1/MYB/CXCR4/HES6/LEF1/HOXB3/ROBO2/NFATC4/DAB1/YAP1/MAP1B/TNF/CDKN2B/NEURL1/FXR1/PPP3CA/HOOK3	19
GO:0014706	striated muscle tissue development	21/580	423/18805	0.049645390070922	1.60962337979946	2.26225088468262	0.0225639163743529	0.225982527688356	0.199564157407034	FRS2/MED1/FKBP1A/SORBS2/MESP1/FHL2/LEF1/ZFPM1/RGS2/FOXP1/PIM1/MSX2/RBM24/KAT2A/SAP30/YAP1/TGFBR3/NEURL1/PPP3CA/GPCPD1/ERBB3	21
GO:0022600	digestive system process	8/580	112/18805	0.0714285714285714	2.31588669950739	2.49168624734185	0.022638618013072	0.226238857236925	0.199790520882574	TFF3/TFF1/TYMP/STK39/PTGER3/GCNT3/SLC46A1/PPP3CA	8
GO:0010508	positive regulation of autophagy	10/580	156/18805	0.0641025641025641	2.07835985853227	2.41270146167584	0.0229837681957411	0.228203060512455	0.201525099992149	AMBRA1/BAG3/HSPB8/PLK2/PIP4K2B/ENDOG/SNX30/WDR24/HTT/SPTLC2	10
GO:0062013	positive regulation of small molecule metabolic process	10/580	156/18805	0.0641025641025641	2.07835985853227	2.41270146167584	0.0229837681957411	0.228203060512455	0.201525099992149	PMAIP1/ELOVL5/NDUFC2/GDF15/ADM/MID1IP1/IRS1/KAT2A/TNF/INSR	10
GO:2000377	regulation of reactive oxygen species metabolic process	10/580	156/18805	0.0641025641025641	2.07835985853227	2.41270146167584	0.0229837681957411	0.228203060512455	0.201525099992149	PRDX2/NDUFC2/PRCP/GADD45A/IER3/EIF6/RIPK1/NNT/TNF/CYBA	10
GO:0006984	ER-nucleus signaling pathway	5/580	53/18805	0.0943396226415094	3.05871828236825	2.6774194159214	0.0233319938325486	0.22968054612511	0.20282986091498	PPP1R15A/AGR2/AMFR/PPP1R15B/EIF2AK3	5
GO:0022602	ovulation cycle process	5/580	53/18805	0.0943396226415094	3.05871828236825	2.6774194159214	0.0233319938325486	0.22968054612511	0.20282986091498	PGR/ESR1/ROBO2/BMPR1B/NRIP1	5
GO:1904035	regulation of epithelial cell apoptotic process	5/580	53/18805	0.0943396226415094	3.05871828236825	2.6774194159214	0.0233319938325486	0.22968054612511	0.20282986091498	ESR1/ZFP36/IGF1R/TIA1/YAP1	5
GO:1990089	response to nerve growth factor	5/580	53/18805	0.0943396226415094	3.05871828236825	2.6774194159214	0.0233319938325486	0.22968054612511	0.20282986091498	ARPC3/KCNC2/EHD1/KAT2A/USP8	5
GO:0032273	positive regulation of protein polymerization	7/580	92/18805	0.0760869565217391	2.4669227886057	2.51614004560563	0.0235843766250833	0.23117707045055	0.204151434839747	AMBRA1/BAIAP2L1/PYCARD/HSPA1A/PFN2/MAP1B/HSPA1B	7
GO:0060021	roof of mouth development	7/580	92/18805	0.0760869565217391	2.4669227886057	2.51614004560563	0.0235843766250833	0.23117707045055	0.204151434839747	SNAI1/ITGB6/TIPARP/LEF1/CSRNP1/TGFBR3/ARID5B	7
GO:0043535	regulation of blood vessel endothelial cell migration	10/580	157/18805	0.0636942675159236	2.0651218976499	2.3907730899068	0.0238980488842284	0.232962361422438	0.205728017295814	KLF4/JUP/EFNA1/PRCP/GADD45A/PLK2/CSNK2B/TNF/TGFBR3/MAP2K3	10
GO:0001569	branching involved in blood vessel morphogenesis	4/580	36/18805	0.111111111111111	3.60249042145594	2.78820802291946	0.0241710459648199	0.232962361422438	0.205728017295814	LEF1/SEMA3E/NFATC4/NRARP	4
GO:0002021	response to dietary excess	4/580	36/18805	0.111111111111111	3.60249042145594	2.78820802291946	0.0241710459648199	0.232962361422438	0.205728017295814	GDF15/STK39/PCSK1N/SLC25A25	4
GO:0002067	glandular epithelial cell differentiation	4/580	36/18805	0.111111111111111	3.60249042145594	2.78820802291946	0.0241710459648199	0.232962361422438	0.205728017295814	PGR/KLF4/YAP1/EXT1	4
GO:0030224	monocyte differentiation	4/580	36/18805	0.111111111111111	3.60249042145594	2.78820802291946	0.0241710459648199	0.232962361422438	0.205728017295814	MYC/MED1/FOXP1/MT1G	4
GO:0035137	hindlimb morphogenesis	4/580	36/18805	0.111111111111111	3.60249042145594	2.78820802291946	0.0241710459648199	0.232962361422438	0.205728017295814	MED1/TFAP2B/MSX2/GPC3	4
GO:0060317	cardiac epithelial to mesenchymal transition	4/580	36/18805	0.111111111111111	3.60249042145594	2.78820802291946	0.0241710459648199	0.232962361422438	0.205728017295814	EFNA1/SNAI1/MSX2/TGFBR3	4
GO:0090183	regulation of kidney development	4/580	36/18805	0.111111111111111	3.60249042145594	2.78820802291946	0.0241710459648199	0.232962361422438	0.205728017295814	MYC/BASP1/HOXB7/PPP3CA	4
GO:0006457	protein folding	13/580	227/18805	0.0572687224669604	1.85679021722619	2.31682535808125	0.0242455871180969	0.233192943325829	0.205931643141291	HSPE1/WDR83OS/BAG3/PDIA4/FKBP1A/FKBP2/FKBP5/HSPA1A/CLU/DNAJC1/HSPA2/POFUT2/HSPA1B	13
GO:0097305	response to alcohol	15/580	276/18805	0.0543478260869565	1.76208770614693	2.27530098928156	0.02475682720093	0.237613964405592	0.20983582704297	JUP/FOSB/SPIDR/FKBP5/IGF1R/ABAT/S100A8/STK39/CLDN7/KLF2/RGS2/KCNC2/TNF/TGFBR3/ITPR2	15
GO:0071806	protein transmembrane transport	6/580	73/18805	0.0821917808219178	2.66485592820028	2.54244380111157	0.025024816524727	0.238534276235529	0.210648550295391	MCL1/PEX2/EXOC4/DNAJC15/BLOC1S6/SEC62	6
GO:0006220	pyrimidine nucleotide metabolic process	5/580	54/18805	0.0925925925925926	3.00207535121328	2.62827274421356	0.025082732054502	0.238534276235529	0.210648550295391	NME1/CTPS2/TYMP/UCK2/DCK	5
GO:0045581	negative regulation of T cell differentiation	5/580	54/18805	0.0925925925925926	3.00207535121328	2.62827274421356	0.025082732054502	0.238534276235529	0.210648550295391	PRDX2/BCL6/SOCS1/LGALS1/NRARP	5
GO:0050873	brown fat cell differentiation	5/580	54/18805	0.0925925925925926	3.00207535121328	2.62827274421356	0.025082732054502	0.238534276235529	0.210648550295391	CEBPB/RGS2/PIM1/FTO/DHRS7B	5
GO:0009261	ribonucleotide catabolic process	9/580	136/18805	0.0661764705882353	2.1456009127789	2.39192537927472	0.0251633727480936	0.238534276235529	0.210648550295391	OGDH/IER3/EIF6/NUDT4/PPP2CA/FOXK2/PDE7A/ENO2/INSR	9
GO:0044409	symbiont entry into host	9/580	136/18805	0.0661764705882353	2.1456009127789	2.39192537927472	0.0251633727480936	0.238534276235529	0.210648550295391	EXOC2/ITGB6/HSPA1A/CXCR4/TMPRSS2/LGALS1/CXCL8/HSPA1B/INSR	9
GO:0051960	regulation of nervous system development	22/580	454/18805	0.0484581497797357	1.57113018380678	2.19754876578176	0.0252990269505162	0.239327755977471	0.21134926869933	IL6ST/TPBG/CERS2/SLC30A1/MYB/CXCR4/TYMP/HES6/LEF1/HOXB3/ROBO2/NFATC4/DAB1/YAP1/MAP1B/TNF/CDKN2B/EIF2AK3/NEURL1/FXR1/PPP3CA/HOOK3	22
GO:0002523	leukocyte migration involved in inflammatory response	3/580	21/18805	0.142857142857143	4.63177339901478	2.97056938215958	0.0256785530757458	0.240449378089351	0.212339768159515	S100A8/S100A9/TNF	3
GO:0006670	sphingosine metabolic process	3/580	21/18805	0.142857142857143	4.63177339901478	2.97056938215958	0.0256785530757458	0.240449378089351	0.212339768159515	SPTSSA/SPTSSB/SPTLC2	3
GO:0035864	response to potassium ion	3/580	21/18805	0.142857142857143	4.63177339901478	2.97056938215958	0.0256785530757458	0.240449378089351	0.212339768159515	NEK7/STK39/SLC12A2	3
GO:0072567	chemokine (C-X-C motif) ligand 2 production	3/580	21/18805	0.142857142857143	4.63177339901478	2.97056938215958	0.0256785530757458	0.240449378089351	0.212339768159515	KLF4/FOXP1/TNF	3
GO:2000341	regulation of chemokine (C-X-C motif) ligand 2 production	3/580	21/18805	0.142857142857143	4.63177339901478	2.97056938215958	0.0256785530757458	0.240449378089351	0.212339768159515	KLF4/FOXP1/TNF	3
GO:0021766	hippocampus development	7/580	94/18805	0.074468085106383	2.41443506969919	2.45247050354679	0.0261659592680857	0.244516377987973	0.215931317542759	OGDH/IGF1R/LEF1/BLOC1S6/DAB1/MFSD2A/FXR1	7
GO:0010092	specification of animal organ identity	4/580	37/18805	0.108108108108108	3.50512581547064	2.72098881532672	0.0264599369701078	0.246264504285427	0.217475080041396	FRS2/MESP1/ROBO2/EXT1	4
GO:0046326	positive regulation of D-glucose import	4/580	37/18805	0.108108108108108	3.50512581547064	2.72098881532672	0.0264599369701078	0.246264504285427	0.217475080041396	IRS1/GPC3/INSR/PIK3R1	4
GO:0035264	multicellular organism growth	10/580	160/18805	0.0625	2.02640086206897	2.32595418018758	0.0267980529857881	0.247556513219416	0.218616047340556	GDF15/KLF2/CDKN1C/SLC25A25/BLOC1S6/KAT2A/MFSD2A/FTO/EXT1/ARID5B	10
GO:0002262	myeloid cell homeostasis	11/580	183/18805	0.0601092896174863	1.94888826078764	2.30108577155234	0.0268136965696741	0.247556513219416	0.218616047340556	ZFP36/MED1/BCL6/HSPA1A/MYB/MAFB/KLF2/ZFPM1/LDB1/TGFBR3/HSPA1B	11
GO:0043534	blood vessel endothelial cell migration	11/580	183/18805	0.0601092896174863	1.94888826078764	2.30108577155234	0.0268136965696741	0.247556513219416	0.218616047340556	KLF4/JUP/EFNA1/PRCP/GADD45A/PLK2/CSNK2B/TNF/TGFBR3/EGR3/MAP2K3	11
GO:0141193	nuclear receptor-mediated signaling pathway	11/580	183/18805	0.0601092896174863	1.94888826078764	2.30108577155234	0.0268136965696741	0.247556513219416	0.218616047340556	PGR/ESR1/MED1/PRCP/SCGB2A2/KLF2/FOXP1/ZDHHC7/PIM1/SCGB2A1/PMEPA1	11
GO:0007589	body fluid secretion	7/580	95/18805	0.0736842105263158	2.38901996370236	2.42124505149244	0.0275263174398729	0.253627488890989	0.223977298747597	MED1/NME1/AGR2/STK39/NEURL1/PPP3CA/CYBA	7
GO:1901292	nucleoside phosphate catabolic process	11/580	184/18805	0.0597826086956522	1.93829647676162	2.28167007544544	0.0277598290799985	0.255268528086932	0.225426493106826	OGDH/IER3/EIF6/TYMP/NUDT4/PPP2CA/FOXK2/PDE7A/ENO2/INSR/CNP	11
GO:0030902	hindbrain development	10/580	161/18805	0.062111801242236	2.01381452131077	2.30466203640335	0.027818299882922	0.255296628606816	0.225451308549997	OGDH/IGF1R/ABAT/MAFB/LEF1/HOXB3/NANOS1/LDB1/DAB1/KAT2A	10
GO:0042698	ovulation cycle	6/580	75/18805	0.08	2.59379310344828	2.46716977433486	0.0281350961600663	0.257040813106604	0.226991590064781	PGR/ESR1/IGF1R/ROBO2/BMPR1B/NRIP1	6
GO:0072527	pyrimidine-containing compound metabolic process	6/580	75/18805	0.08	2.59379310344828	2.46716977433486	0.0281350961600663	0.257040813106604	0.226991590064781	NME1/CTPS2/TYMP/SLC19A2/UCK2/DCK	6
GO:0006195	purine nucleotide catabolic process	9/580	139/18805	0.0647482014388489	2.09929297940958	2.32060152495559	0.0284503411125711	0.257040813106604	0.226991590064781	OGDH/IER3/EIF6/NUDT4/PPP2CA/FOXK2/PDE7A/ENO2/INSR	9
GO:0046854	phosphatidylinositol phosphate biosynthetic process	5/580	56/18805	0.0892857142857143	2.89485837438424	2.53330257149288	0.0288314994706704	0.257040813106604	0.226991590064781	PIP4K2B/IMPA2/OCRL/PIK3C2G/PIK3R1	5
GO:0006901	vesicle coating	4/580	38/18805	0.105263157894737	3.41288566243194	2.65605132912316	0.0288743433614987	0.257040813106604	0.226991590064781	PDCD6/TRAPPC10/TRAPPC9/TRAPPC1	4
GO:0006904	vesicle docking involved in exocytosis	4/580	38/18805	0.105263157894737	3.41288566243194	2.65605132912316	0.0288743433614987	0.257040813106604	0.226991590064781	YKT6/EXOC2/EXOC4/BLOC1S6	4
GO:0045589	regulation of regulatory T cell differentiation	4/580	38/18805	0.105263157894737	3.41288566243194	2.65605132912316	0.0288743433614987	0.257040813106604	0.226991590064781	AMBRA1/BCL6/SOCS1/KAT2A	4
GO:0048730	epidermis morphogenesis	4/580	38/18805	0.105263157894737	3.41288566243194	2.65605132912316	0.0288743433614987	0.257040813106604	0.226991590064781	KLF4/IGFBP5/SNAI1/EXT1	4
GO:0071392	cellular response to estradiol stimulus	4/580	38/18805	0.105263157894737	3.41288566243194	2.65605132912316	0.0288743433614987	0.257040813106604	0.226991590064781	ESR1/IGF1R/MSX2/NRIP1	4
GO:0001759	organ induction	3/580	22/18805	0.136363636363636	4.42123824451411	2.86429357540061	0.029068431436627	0.257040813106604	0.226991590064781	FRS2/MESP1/ROBO2	3
GO:0006662	glycerol ether metabolic process	3/580	22/18805	0.136363636363636	4.42123824451411	2.86429357540061	0.029068431436627	0.257040813106604	0.226991590064781	AGPS/FAR1/DHRS7B	3
GO:0009110	vitamin biosynthetic process	3/580	22/18805	0.136363636363636	4.42123824451411	2.86429357540061	0.029068431436627	0.257040813106604	0.226991590064781	SNAI1/SLC19A2/TNF	3
GO:0009129	pyrimidine nucleoside monophosphate metabolic process	3/580	22/18805	0.136363636363636	4.42123824451411	2.86429357540061	0.029068431436627	0.257040813106604	0.226991590064781	TYMP/UCK2/DCK	3
GO:0018394	peptidyl-lysine acetylation	3/580	22/18805	0.136363636363636	4.42123824451411	2.86429357540061	0.029068431436627	0.257040813106604	0.226991590064781	HINT2/BLOC1S1/KAT2A	3
GO:0030204	chondroitin sulfate metabolic process	3/580	22/18805	0.136363636363636	4.42123824451411	2.86429357540061	0.029068431436627	0.257040813106604	0.226991590064781	UGDH/SLC35B2/EXT1	3
GO:0035795	negative regulation of mitochondrial membrane permeability	3/580	22/18805	0.136363636363636	4.42123824451411	2.86429357540061	0.029068431436627	0.257040813106604	0.226991590064781	IER3/HSPA1A/GCLC	3
GO:0046485	ether lipid metabolic process	3/580	22/18805	0.136363636363636	4.42123824451411	2.86429357540061	0.029068431436627	0.257040813106604	0.226991590064781	AGPS/FAR1/DHRS7B	3
GO:0071498	cellular response to fluid shear stress	3/580	22/18805	0.136363636363636	4.42123824451411	2.86429357540061	0.029068431436627	0.257040813106604	0.226991590064781	KLF4/TFPI2/KLF2	3
GO:1902004	positive regulation of amyloid-beta formation	3/580	22/18805	0.136363636363636	4.42123824451411	2.86429357540061	0.029068431436627	0.257040813106604	0.226991590064781	EFNA1/CLU/TNF	3
GO:0048705	skeletal system morphogenesis	13/580	233/18805	0.055793991416309	1.80897587686843	2.21661130564706	0.0291583293217665	0.25734180686854	0.227257396306972	PCGF2/TIPARP/LTF/WWOX/HOXB3/MSX2/CSRNP1/HOXB7/SLC39A1/HOXC9/EXT1/BMPR1B/ARID5B	13
GO:0002753	cytoplasmic pattern recognition receptor signaling pathway	11/580	186/18805	0.0591397849462366	1.91745457916203	2.24320114689219	0.029723791496122	0.261830798131231	0.23122160437257	PYCARD/HSPA1A/CYLD/NEK7/ZDHHC5/PPP2CA/PELI1/TSPAN6/TNF/ZCCHC3/HSPA1B	11
GO:1902893	regulation of miRNA transcription	6/580	76/18805	0.0789473684210526	2.55966424682396	2.43044595085202	0.0297816126074847	0.261839483363897	0.231229274262612	KLF4/MYC/ESR1/MYB/NFATC4/TNF	6
GO:0060070	canonical Wnt signaling pathway	17/580	333/18805	0.0510510510510511	1.65519830175003	2.15200496719635	0.0299234640202194	0.262585521411716	0.231888097119094	KLF4/IGFBP4/IGFBP2/TPBG/JUP/SNAI1/AMFR/MESP1/CYLD/LEF1/GPC3/NRARP/YAP1/FRAT2/EXT1/CDK14/USP8	17
GO:0050678	regulation of epithelial cell proliferation	20/580	410/18805	0.0487804878048781	1.58158116063919	2.12401564654163	0.0300360447623619	0.262632437990705	0.231929528939731	PGR/FRS2/PDCD6/MYC/ZFP36/MED1/NME1/PEX2/OVOL1/CDKN1C/NRAS/GPC3/NRARP/YAP1/TNF/ECM1/TGFBR3/CDKN2B/EGR3/AREG	20
GO:0009165	nucleotide biosynthetic process	13/580	234/18805	0.0555555555555556	1.80124521072797	2.20019452623315	0.0300428250100069	0.262632437990705	0.231929528939731	ATP5MF/ATP5MG/NDUFC2/NDUFA11/NDUFA13/ATP5PO/NME1/CTPS2/SDHA/UCK2/NDUFB8/DCK/KYNU	13
GO:0001942	hair follicle development	7/580	97/18805	0.0721649484536082	2.33976182012087	2.35996267024178	0.0303893681062428	0.264158148802756	0.233276877320017	IGFBP5/SNAI1/TRPC4AP/MSX2/LDB1/TNF/EXT1	7
GO:0006096	glycolytic process	7/580	97/18805	0.0721649484536082	2.33976182012087	2.35996267024178	0.0303893681062428	0.264158148802756	0.233276877320017	OGDH/IER3/EIF6/PPP2CA/FOXK2/ENO2/INSR	7
GO:0015837	amine transport	7/580	97/18805	0.0721649484536082	2.33976182012087	2.35996267024178	0.0303893681062428	0.264158148802756	0.233276877320017	ARL6IP1/SLC38A2/ABAT/RGS2/SLC43A1/TNF/SLC12A2	7
GO:0002762	negative regulation of myeloid leukocyte differentiation	5/580	57/18805	0.087719298245614	2.84407138535995	2.48738513081905	0.0308315529477182	0.267066363531241	0.235845108712885	MYC/MAFB/LTF/ZFPM1/PIK3R1	5
GO:0051402	neuron apoptotic process	16/580	309/18805	0.0517799352750809	1.67883048766879	2.14638201200671	0.0308398752764533	0.267066363531241	0.235845108712885	AMBRA1/IL6ST/CEBPB/MCL1/TRAF7/ATP13A2/TFAP2B/CLU/MYB/TMBIM4/RIPK1/GCLC/SEMA3E/NFATC4/TNF/ERBB3	16
GO:0006352	DNA-templated transcription initiation	12/580	211/18805	0.0568720379146919	1.84392874652721	2.19920616495791	0.0310329306030924	0.267606284251822	0.236321910281446	MYC/ESR1/MED1/BCLAF1/CDK9/MED14/BRF1/TFB2M/KDM1B/TAF9/NFKBIZ/TAF1B	12
GO:0044703	multi-organism reproductive process	12/580	211/18805	0.0568720379146919	1.84392874652721	2.19920616495791	0.0310329306030924	0.267606284251822	0.236321910281446	PGR/IGFBP2/ESR1/MED1/SLC38A2/IGFBP5/FOSB/LDOC1/JUNB/ADM/YTHDF3/RGS2	12
GO:0030518	nuclear receptor-mediated steroid hormone signaling pathway	8/580	119/18805	0.0672268907563025	2.1796580701246	2.30290912736942	0.0310764840622367	0.267606284251822	0.236321910281446	PGR/ESR1/MED1/SCGB2A2/FOXP1/ZDHHC7/SCGB2A1/PMEPA1	8
GO:0060323	head morphogenesis	4/580	39/18805	0.102564102564103	3.32537577365164	2.59325330839144	0.0314152437768176	0.267665555816241	0.236374252734345	TIPARP/LEF1/CSRNP1/ARID5B	4
GO:0070229	negative regulation of lymphocyte apoptotic process	4/580	39/18805	0.102564102564103	3.32537577365164	2.59325330839144	0.0314152437768176	0.267665555816241	0.236374252734345	TSC22D3/EFNA1/BCL6/FOXP1	4
GO:0070884	regulation of calcineurin-NFAT signaling cascade	4/580	39/18805	0.102564102564103	3.32537577365164	2.59325330839144	0.0314152437768176	0.267665555816241	0.236374252734345	FHL2/TNF/PPP3CA/ERBB3	4
GO:2000316	regulation of T-helper 17 type immune response	4/580	39/18805	0.102564102564103	3.32537577365164	2.59325330839144	0.0314152437768176	0.267665555816241	0.236374252734345	BRD2/JUNB/LGALS1/NFKBIZ	4
GO:0009880	embryonic pattern specification	6/580	77/18805	0.0779220779220779	2.52642185400806	2.39430563173549	0.031490065390146	0.267665555816241	0.236374252734345	FRS2/EPB41L5/MESP1/BASP1/TDRKH/NRARP	6
GO:0032007	negative regulation of TOR signaling	6/580	77/18805	0.0779220779220779	2.52642185400806	2.39430563173549	0.031490065390146	0.267665555816241	0.236374252734345	PDCD6/PREX1/SEH1L/ENDOG/WDR24/PELI1	6
GO:0061614	miRNA transcription	6/580	77/18805	0.0779220779220779	2.52642185400806	2.39430563173549	0.031490065390146	0.267665555816241	0.236374252734345	KLF4/MYC/ESR1/MYB/NFATC4/TNF	6
GO:0010594	regulation of endothelial cell migration	13/580	236/18805	0.0550847457627119	1.78598042080655	2.16759839408639	0.0318700632410255	0.269733747409687	0.238200663461424	KLF4/PDCD6/JUP/EFNA1/PRCP/GADD45A/PLK2/CSNK2B/BCAS3/FOXP1/TNF/TGFBR3/MAP2K3	13
GO:0045861	negative regulation of proteolysis	10/580	165/18805	0.0606060606060606	1.9649947753396	2.22100394340758	0.0321763551402771	0.269733747409687	0.238200663461424	EFNA1/CSTB/CSNK2B/DNAJC1/TIMP3/PLAT/CSTA/F8A1/TAF9/ECM1	10
GO:0007006	mitochondrial membrane organization	8/580	120/18805	0.0666666666666667	2.16149425287356	2.27701812032081	0.0324362755703381	0.269733747409687	0.238200663461424	CHCHD3/PMAIP1/NDUFA13/IER3/HSPA1A/GCLC/TMEM11/CNP	8
GO:0051146	striated muscle cell differentiation	16/580	311/18805	0.0514469453376206	1.66803415012751	2.11918456304488	0.0324396250669944	0.269733747409687	0.238200663461424	FRS2/IGFBP5/GDF15/SORBS2/MESP1/SMYD3/FHL2/RGS2/FOXP1/TANC1/EHD1/RBM24/KAT2A/KRT19/PPP3CA/TNNT1	16
GO:0006658	phosphatidylserine metabolic process	3/580	23/18805	0.130434782608696	4.22901049475262	2.76418945577144	0.0326827495957083	0.269733747409687	0.238200663461424	MBOAT1/SERINC5/MFSD2A	3
GO:0031290	retinal ganglion cell axon guidance	3/580	23/18805	0.130434782608696	4.22901049475262	2.76418945577144	0.0326827495957083	0.269733747409687	0.238200663461424	ALCAM/ROBO2/BMPR1B	3
GO:0032785	negative regulation of DNA-templated transcription, elongation	3/580	23/18805	0.130434782608696	4.22901049475262	2.76418945577144	0.0326827495957083	0.269733747409687	0.238200663461424	HEXIM1/SUPT4H1/LARP7	3
GO:0034312	diol biosynthetic process	3/580	23/18805	0.130434782608696	4.22901049475262	2.76418945577144	0.0326827495957083	0.269733747409687	0.238200663461424	SPTSSA/SPTSSB/SPTLC2	3
GO:0038128	ERBB2 signaling pathway	3/580	23/18805	0.130434782608696	4.22901049475262	2.76418945577144	0.0326827495957083	0.269733747409687	0.238200663461424	RAF1/AREG/ERBB3	3
GO:0046519	sphingoid metabolic process	3/580	23/18805	0.130434782608696	4.22901049475262	2.76418945577144	0.0326827495957083	0.269733747409687	0.238200663461424	SPTSSA/SPTSSB/SPTLC2	3
GO:0046599	regulation of centriole replication	3/580	23/18805	0.130434782608696	4.22901049475262	2.76418945577144	0.0326827495957083	0.269733747409687	0.238200663461424	PLK2/NUP62/KAT2A	3
GO:0051957	positive regulation of amino acid transport	3/580	23/18805	0.130434782608696	4.22901049475262	2.76418945577144	0.0326827495957083	0.269733747409687	0.238200663461424	ARL6IP1/ABAT/SLC12A2	3
GO:0060706	cell differentiation involved in embryonic placenta development	3/580	23/18805	0.130434782608696	4.22901049475262	2.76418945577144	0.0326827495957083	0.269733747409687	0.238200663461424	SPINT2/SNAI1/KRT19	3
GO:0071305	cellular response to vitamin D	3/580	23/18805	0.130434782608696	4.22901049475262	2.76418945577144	0.0326827495957083	0.269733747409687	0.238200663461424	MED1/PIM1/GDAP1	3
GO:0097062	dendritic spine maintenance	3/580	23/18805	0.130434782608696	4.22901049475262	2.76418945577144	0.0326827495957083	0.269733747409687	0.238200663461424	IGF1R/TANC1/INSR	3
GO:0140112	extracellular vesicle biogenesis	3/580	23/18805	0.130434782608696	4.22901049475262	2.76418945577144	0.0326827495957083	0.269733747409687	0.238200663461424	ATP13A2/ARRDC1/COPS5	3
GO:0050878	regulation of body fluid levels	19/580	388/18805	0.0489690721649485	1.5876955207963	2.08671985804137	0.0327287095294151	0.269733747409687	0.238200663461424	IL6ST/PRDX2/MED1/MLLT6/SERPINA1/NME1/AGR2/TFPI2/ADM/VKORC1/STK39/CD59/PLAT/BLOC1S6/GNA12/EXT1/NEURL1/PPP3CA/CYBA	19
GO:0035329	hippo signaling	5/580	58/18805	0.0862068965517241	2.79503567181926	2.44245482654198	0.0329165827921979	0.270314967778353	0.238713936564115	ARRDC3/PPP2CA/MOB1B/YAP1/MAP2K3	5
GO:1990928	response to amino acid starvation	5/580	58/18805	0.0862068965517241	2.79503567181926	2.44245482654198	0.0329165827921979	0.270314967778353	0.238713936564115	SLC38A2/PEX2/SEH1L/WDR24/EIF2AK3	5
GO:0010827	regulation of D-glucose transmembrane transport	6/580	78/18805	0.0769230769230769	2.49403183023873	2.35873089663677	0.0332611615428654	0.271279122308251	0.23956537710838	PEA15/IRS1/GPC3/TNF/INSR/PIK3R1	6
GO:0046425	regulation of receptor signaling pathway via JAK-STAT	6/580	78/18805	0.0769230769230769	2.49403183023873	2.35873089663677	0.0332611615428654	0.271279122308251	0.23956537710838	GADD45A/ELP2/SOCS3/SOCS1/LEPROT/DAB1	6
GO:0010212	response to ionizing radiation	9/580	143/18805	0.0629370629370629	2.04057149746805	2.22826173093936	0.0332862785537543	0.271279122308251	0.23956537710838	RPL26/MYC/GADD45A/SPIDR/ITGB6/YAP1/TNF/NUCKS1/TSPYL5	9
GO:0034763	negative regulation of transmembrane transport	9/580	143/18805	0.0629370629370629	2.04057149746805	2.22826173093936	0.0332862785537543	0.271279122308251	0.23956537710838	CALM2/KCNE4/SLC30A1/PEA15/STK39/RGS2/SLC43A1/TNF/PPP3CA	9
GO:0046032	ADP catabolic process	7/580	99/18805	0.0707070707070707	2.29249390456287	2.30017556437218	0.0334461778752088	0.271279122308251	0.23956537710838	OGDH/IER3/EIF6/PPP2CA/FOXK2/ENO2/INSR	7
GO:0050848	regulation of calcium-mediated signaling	7/580	99/18805	0.0707070707070707	2.29249390456287	2.30017556437218	0.0334461778752088	0.271279122308251	0.23956537710838	CALM2/TMBIM4/FHL2/TNF/HTT/PPP3CA/ERBB3	7
GO:0060993	kidney morphogenesis	7/580	99/18805	0.0707070707070707	2.29249390456287	2.30017556437218	0.0334461778752088	0.271279122308251	0.23956537710838	MYC/BASP1/GPC3/HOXB7/GCNT3/PPP3CA/NPNT	7
GO:0042303	molting cycle	8/580	121/18805	0.0661157024793388	2.14363066400684	2.25138048300491	0.0338360962728319	0.27308210290861	0.24115758119607	IGFBP5/SNAI1/TRPC4AP/MSX2/LDB1/TNF/FARP2/EXT1	8
GO:0042633	hair cycle	8/580	121/18805	0.0661157024793388	2.14363066400684	2.25138048300491	0.0338360962728319	0.27308210290861	0.24115758119607	IGFBP5/SNAI1/TRPC4AP/MSX2/LDB1/TNF/FARP2/EXT1	8
GO:0051897	positive regulation of phosphatidylinositol 3-kinase/protein kinase B signal transduction	11/580	190/18805	0.0578947368421053	1.87708711433757	2.16767096464796	0.0339464160542536	0.27308210290861	0.24115758119607	AMBRA1/TPBG/IGFBP5/IGF1R/GDF15/IRS1/SEMA3E/TNF/TSPYL5/INSR/ERBB3	11
GO:0045730	respiratory burst	4/580	40/18805	0.1	3.24224137931034	2.53246483618725	0.0340833968249297	0.27308210290861	0.24115758119607	PRDX2/S100A9/CYBA/INSR	4
GO:0045923	positive regulation of fatty acid metabolic process	4/580	40/18805	0.1	3.24224137931034	2.53246483618725	0.0340833968249297	0.27308210290861	0.24115758119607	ELOVL5/GDF15/MID1IP1/IRS1	4
GO:0060416	response to growth hormone	4/580	40/18805	0.1	3.24224137931034	2.53246483618725	0.0340833968249297	0.27308210290861	0.24115758119607	IGFBP5/GDF15/LEPROT/PIK3R1	4
GO:0106056	regulation of calcineurin-mediated signaling	4/580	40/18805	0.1	3.24224137931034	2.53246483618725	0.0340833968249297	0.27308210290861	0.24115758119607	FHL2/TNF/PPP3CA/ERBB3	4
GO:1903050	regulation of proteolysis involved in protein catabolic process	13/580	239/18805	0.0543933054393305	1.76356225652864	2.1192860512985	0.0347596335083807	0.277176539538706	0.244773359833914	EFNA1/SUMO2/TRAF7/CSNK2B/HSPA1A/CLU/ZFAND2A/GCLC/F8A1/GNA12/TAF9/PSMC1/HSPA1B	13
GO:0032640	tumor necrosis factor production	11/580	191/18805	0.0575916230366492	1.86725943311067	2.14907321174555	0.0350650587322904	0.277176539538706	0.244773359833914	ZFP36/DDT/PYCARD/CLU/LTF/RIPK1/FOXP1/NFATC4/FXR1/CYBA/PIK3R1	11
GO:0032680	regulation of tumor necrosis factor production	11/580	191/18805	0.0575916230366492	1.86725943311067	2.14907321174555	0.0350650587322904	0.277176539538706	0.244773359833914	ZFP36/DDT/PYCARD/CLU/LTF/RIPK1/FOXP1/NFATC4/FXR1/CYBA/PIK3R1	11
GO:0046902	regulation of mitochondrial membrane permeability	5/580	59/18805	0.0847457627118644	2.74766218585622	2.39847136875077	0.0350873710223794	0.277176539538706	0.244773359833914	PMAIP1/IER3/HSPA1A/GCLC/CNP	5
GO:0001542	ovulation from ovarian follicle	2/580	10/18805	0.2	6.48448275862069	3.0947093002219	0.0362673678907931	0.277176539538706	0.244773359833914	PGR/NRIP1	2
GO:0002536	respiratory burst involved in inflammatory response	2/580	10/18805	0.2	6.48448275862069	3.0947093002219	0.0362673678907931	0.277176539538706	0.244773359833914	PRDX2/S100A9	2
GO:0006702	androgen biosynthetic process	2/580	10/18805	0.2	6.48448275862069	3.0947093002219	0.0362673678907931	0.277176539538706	0.244773359833914	MED1/SRD5A3	2
GO:0014012	peripheral nervous system axon regeneration	2/580	10/18805	0.2	6.48448275862069	3.0947093002219	0.0362673678907931	0.277176539538706	0.244773359833914	CERS2/MAP1B	2
GO:0030002	intracellular monoatomic anion homeostasis	2/580	10/18805	0.2	6.48448275862069	3.0947093002219	0.0362673678907931	0.277176539538706	0.244773359833914	STK39/SLC12A2	2
GO:0030644	intracellular chloride ion homeostasis	2/580	10/18805	0.2	6.48448275862069	3.0947093002219	0.0362673678907931	0.277176539538706	0.244773359833914	STK39/SLC12A2	2
GO:0032329	serine transport	2/580	10/18805	0.2	6.48448275862069	3.0947093002219	0.0362673678907931	0.277176539538706	0.244773359833914	SLC38A2/SERINC5	2
GO:0035655	interleukin-18-mediated signaling pathway	2/580	10/18805	0.2	6.48448275862069	3.0947093002219	0.0362673678907931	0.277176539538706	0.244773359833914	CYLD/PIK3R1	2
GO:0038129	ERBB3 signaling pathway	2/580	10/18805	0.2	6.48448275862069	3.0947093002219	0.0362673678907931	0.277176539538706	0.244773359833914	RAF1/ERBB3	2
GO:0042368	vitamin D biosynthetic process	2/580	10/18805	0.2	6.48448275862069	3.0947093002219	0.0362673678907931	0.277176539538706	0.244773359833914	SNAI1/TNF	2
GO:0043558	regulation of translational initiation in response to stress	2/580	10/18805	0.2	6.48448275862069	3.0947093002219	0.0362673678907931	0.277176539538706	0.244773359833914	PPP1R15A/EIF2AK3	2
GO:0045136	development of secondary sexual characteristics	2/580	10/18805	0.2	6.48448275862069	3.0947093002219	0.0362673678907931	0.277176539538706	0.244773359833914	MED1/AREG	2
GO:0048340	paraxial mesoderm morphogenesis	2/580	10/18805	0.2	6.48448275862069	3.0947093002219	0.0362673678907931	0.277176539538706	0.244773359833914	EXOC4/LEF1	2
GO:0051292	nuclear pore complex assembly	2/580	10/18805	0.2	6.48448275862069	3.0947093002219	0.0362673678907931	0.277176539538706	0.244773359833914	NUP98/FXR1	2
GO:0051409	response to nitrosative stress	2/580	10/18805	0.2	6.48448275862069	3.0947093002219	0.0362673678907931	0.277176539538706	0.244773359833914	GCLC/DUSP6	2
GO:0060525	prostate glandular acinus development	2/580	10/18805	0.2	6.48448275862069	3.0947093002219	0.0362673678907931	0.277176539538706	0.244773359833914	FRS2/ESR1	2
GO:0070432	regulation of nucleotide-binding oligomerization domain containing 2 signaling pathway	2/580	10/18805	0.2	6.48448275862069	3.0947093002219	0.0362673678907931	0.277176539538706	0.244773359833914	HSPA1A/HSPA1B	2
GO:0071287	cellular response to manganese ion	2/580	10/18805	0.2	6.48448275862069	3.0947093002219	0.0362673678907931	0.277176539538706	0.244773359833914	ATP13A2/EIF2AK3	2
GO:0071351	cellular response to interleukin-18	2/580	10/18805	0.2	6.48448275862069	3.0947093002219	0.0362673678907931	0.277176539538706	0.244773359833914	CYLD/PIK3R1	2
GO:0072203	cell proliferation involved in metanephros development	2/580	10/18805	0.2	6.48448275862069	3.0947093002219	0.0362673678907931	0.277176539538706	0.244773359833914	MYC/GPC3	2
GO:0090184	positive regulation of kidney development	2/580	10/18805	0.2	6.48448275862069	3.0947093002219	0.0362673678907931	0.277176539538706	0.244773359833914	MYC/PPP3CA	2
GO:1901856	negative regulation of cellular respiration	2/580	10/18805	0.2	6.48448275862069	3.0947093002219	0.0362673678907931	0.277176539538706	0.244773359833914	DNAJC15/TNF	2
GO:0009147	pyrimidine nucleoside triphosphate metabolic process	3/580	24/18805	0.125	4.05280172413793	2.66962470306196	0.0365196786411971	0.277176539538706	0.244773359833914	NME1/CTPS2/UCK2	3
GO:0045591	positive regulation of regulatory T cell differentiation	3/580	24/18805	0.125	4.05280172413793	2.66962470306196	0.0365196786411971	0.277176539538706	0.244773359833914	AMBRA1/BCL6/SOCS1	3
GO:0046628	positive regulation of insulin receptor signaling pathway	3/580	24/18805	0.125	4.05280172413793	2.66962470306196	0.0365196786411971	0.277176539538706	0.244773359833914	CTSD/IRS1/NUCKS1	3
GO:0072574	hepatocyte proliferation	3/580	24/18805	0.125	4.05280172413793	2.66962470306196	0.0365196786411971	0.277176539538706	0.244773359833914	CEBPB/MED1/TNF	3
GO:0072575	epithelial cell proliferation involved in liver morphogenesis	3/580	24/18805	0.125	4.05280172413793	2.66962470306196	0.0365196786411971	0.277176539538706	0.244773359833914	CEBPB/MED1/TNF	3
GO:1901028	regulation of mitochondrial outer membrane permeabilization involved in apoptotic signaling pathway	3/580	24/18805	0.125	4.05280172413793	2.66962470306196	0.0365196786411971	0.277176539538706	0.244773359833914	IER3/HSPA1A/GCLC	3
GO:0019364	pyridine nucleotide catabolic process	7/580	101/18805	0.0693069306930693	2.24709798566064	2.24181291748637	0.0367011619020327	0.277639167295016	0.245181904332134	OGDH/IER3/EIF6/PPP2CA/FOXK2/ENO2/INSR	7
GO:0048661	positive regulation of smooth muscle cell proliferation	7/580	101/18805	0.0693069306930693	2.24709798566064	2.24181291748637	0.0367011619020327	0.277639167295016	0.245181904332134	FRS2/IGFBP5/IGF1R/MYB/FOXP1/TNF/PIK3R1	7
GO:0097242	amyloid-beta clearance	4/580	41/18805	0.0975609756097561	3.16316232127839	2.47356698331885	0.0368793459131321	0.278027410701579	0.245524760344465	IGF1R/CLU/TNF/INSR	4
GO:0061448	connective tissue development	15/580	291/18805	0.0515463917525773	1.67125844294348	2.05869246773807	0.0369812050305221	0.278027410701579	0.245524760344465	SNAI1/ARRDC3/HOXB3/MSX2/SLC25A25/KAT2A/MEX3C/ECM1/EIF2AK3/FTO/EXT1/BMPR1B/DHRS7B/ARID5B/SPTLC2	15
GO:0044272	sulfur compound biosynthetic process	10/580	169/18805	0.0591715976331361	1.91848602326056	2.1396606657113	0.0369932754429116	0.278027410701579	0.245524760344465	ACLY/ELOVL5/UGDH/MRI1/SLC35B2/MPC2/SLC19A2/GCLC/SLC27A2/EXT1	10
GO:0006809	nitric oxide biosynthetic process	6/580	80/18805	0.075	2.43168103448276	2.28921035508267	0.0369938794790684	0.278027410701579	0.245524760344465	KLF4/ESR1/CLU/KLF2/TNF/INSR	6
GO:0071900	regulation of protein serine/threonine kinase activity	12/580	217/18805	0.0552995391705069	1.79294454155411	2.09585724594826	0.037263714847486	0.278204405214825	0.24568106340587	CALM2/CDK12/GADD45A/PYCARD/SERTAD1/LTF/RGS2/PIM1/PPP2CA/TNF/CDKN2B/INSR	12
GO:0001101	response to acid chemical	9/580	146/18805	0.0616438356164384	1.99864194615021	2.16096333828461	0.0372667021008072	0.278204405214825	0.24568106340587	CEBPB/IGF1R/SOCS1/KLF2/GCLC/COL18A1/TAF9/TNF/NEURL1	9
GO:0009895	negative regulation of catabolic process	18/580	368/18805	0.0489130434782609	1.58587893553223	2.02484607646946	0.0373013804016452	0.278204405214825	0.24568106340587	ZFP36/MCL1/CRTC3/ATP13A2/IER3/SF3B3/CSNK2B/TIMP3/ZDHHC7/PPP2CA/RBM24/F8A1/FOXK2/TAF9/MFSD2A/TNF/USP8/FXR1	18
GO:0042255	ribosome assembly	5/580	60/18805	0.0833333333333333	2.70186781609195	2.35539678433702	0.0373446071676971	0.278204405214825	0.24568106340587	ERAL1/EIF6/MPV17L2/EIF5B/RPS28	5
GO:0006006	glucose metabolic process	11/580	193/18805	0.0569948186528497	1.84790959442559	2.11220969464648	0.0373797540325541	0.278204405214825	0.24568106340587	IGFBP4/TFF3/PMAIP1/TFAP2B/IRS1/KAT2A/FOXK2/TNF/SORD/ENO2/INSR	11
GO:0007254	JNK cascade	11/580	193/18805	0.0569948186528497	1.84790959442559	2.11220969464648	0.0373797540325541	0.278204405214825	0.24568106340587	MECOM/TRAF4/GADD45A/PYCARD/IGF1R/CYLD/RIPK1/TNF/MAP2K3/COPS5/TNIK	11
GO:0072009	nephron epithelium development	8/580	124/18805	0.0645161290322581	2.09176863181313	2.17593913962657	0.0382800354901186	0.284445360488672	0.251192423037875	MYC/TFAP2B/BASP1/GPC3/HOXB7/YAP1/EXT1/NPNT	8
GO:0009137	purine nucleoside diphosphate catabolic process	7/580	102/18805	0.0686274509803922	2.2250676132522	2.21314494086736	0.0384042322918626	0.284450640142461	0.251197085476475	OGDH/IER3/EIF6/PPP2CA/FOXK2/ENO2/INSR	7
GO:0009181	purine ribonucleoside diphosphate catabolic process	7/580	102/18805	0.0686274509803922	2.2250676132522	2.21314494086736	0.0384042322918626	0.284450640142461	0.251197085476475	OGDH/IER3/EIF6/PPP2CA/FOXK2/ENO2/INSR	7
GO:0021543	pallium development	11/580	194/18805	0.0567010309278351	1.83838428723782	2.09394123932538	0.0385763059853444	0.285266519541704	0.251917584917388	SLC38A2/OGDH/IGF1R/TMEM14B/LEF1/BLOC1S6/SOCS7/DAB1/TRAPPC9/MFSD2A/FXR1	11
GO:0045598	regulation of fat cell differentiation	9/580	147/18805	0.0612244897959184	1.9850457424349	2.1388871473358	0.0386627372872759	0.285447485068077	0.252077394762688	CEBPB/ZFP36/ADIRF/PIM1/MSX2/MEX3C/YAP1/TNF/FTO	9
GO:0001510	RNA methylation	6/580	81/18805	0.0740740740740741	2.40166028097063	2.2552324382877	0.0389566809229646	0.285785714987417	0.252376084088599	SNRPD3/TRMT5/RBM15B/LARP7/TFB2M/TRMT1	6
GO:0032436	positive regulation of proteasomal ubiquitin-dependent protein catabolic process	6/580	81/18805	0.0740740740740741	2.40166028097063	2.2552324382877	0.0389566809229646	0.285785714987417	0.252376084088599	SUMO2/HSPA1A/CLU/ZFAND2A/GCLC/HSPA1B	6
GO:0046637	regulation of alpha-beta T cell differentiation	6/580	81/18805	0.0740740740740741	2.40166028097063	2.2552324382877	0.0389566809229646	0.285785714987417	0.252376084088599	BRD2/BCL6/JUNB/SOCS1/LGALS1/NFKBIZ	6
GO:0140238	presynaptic endocytosis	6/580	81/18805	0.0740740740740741	2.40166028097063	2.2552324382877	0.0389566809229646	0.285785714987417	0.252376084088599	CALM2/ARPC3/MX1/AMPH/VAMP2/ITSN2	6
GO:0044706	multi-multicellular organism process	12/580	219/18805	0.0547945205479452	1.77657061880019	2.06212693885359	0.0395241246407346	0.286815911827178	0.253285846300719	PGR/IGFBP2/ESR1/MED1/SLC38A2/IGFBP5/FOSB/LDOC1/JUNB/ADM/YTHDF3/RGS2	12
GO:0043409	negative regulation of MAPK cascade	10/580	171/18805	0.0584795321637427	1.89604759023997	2.09981694176006	0.0395798903635178	0.286815911827178	0.253285846300719	MECOM/MYC/EFNA1/DUSP5/IGF1R/CYLD/RGS2/DUSP2/DUSP6/DUSP4	10
GO:0043524	negative regulation of neuron apoptotic process	10/580	171/18805	0.0584795321637427	1.89604759023997	2.09981694176006	0.0395798903635178	0.286815911827178	0.253285846300719	AMBRA1/IL6ST/CEBPB/TFAP2B/CLU/TMBIM4/GCLC/SEMA3E/NFATC4/ERBB3	10
GO:0001706	endoderm formation	5/580	61/18805	0.0819672131147541	2.65757490107405	2.31319524715741	0.0396888883527992	0.286815911827178	0.253285846300719	DUSP5/MESP1/DUSP2/LEO1/DUSP4	5
GO:0001961	positive regulation of cytokine-mediated signaling pathway	5/580	61/18805	0.0819672131147541	2.65757490107405	2.31319524715741	0.0396888883527992	0.286815911827178	0.253285846300719	MED1/HSPA1A/CXCR4/RIPK1/HSPA1B	5
GO:0031102	neuron projection regeneration	5/580	61/18805	0.0819672131147541	2.65757490107405	2.31319524715741	0.0396888883527992	0.286815911827178	0.253285846300719	KLF4/CERS2/IGF1R/ADM/MAP1B	5
GO:0045066	regulatory T cell differentiation	4/580	42/18805	0.0952380952380952	3.08784893267652	2.41645063419084	0.0398034244995984	0.286815911827178	0.253285846300719	AMBRA1/BCL6/SOCS1/KAT2A	4
GO:0045454	cell redox homeostasis	4/580	42/18805	0.0952380952380952	3.08784893267652	2.41645063419084	0.0398034244995984	0.286815911827178	0.253285846300719	PRDX2/TXNRD1/NNT/GCLC	4
GO:0060251	regulation of glial cell proliferation	4/580	42/18805	0.0952380952380952	3.08784893267652	2.41645063419084	0.0398034244995984	0.286815911827178	0.253285846300719	CERS2/MYB/TNF/CDKN2B	4
GO:0060421	positive regulation of heart growth	4/580	42/18805	0.0952380952380952	3.08784893267652	2.41645063419084	0.0398034244995984	0.286815911827178	0.253285846300719	BASP1/PIM1/YAP1/TGFBR3	4
GO:0021761	limbic system development	8/580	125/18805	0.064	2.07503448275862	2.15126699853446	0.039844190051963	0.286815911827178	0.253285846300719	OGDH/IGF1R/LEF1/SEMA3E/BLOC1S6/DAB1/MFSD2A/FXR1	8
GO:1990748	cellular detoxification	8/580	125/18805	0.064	2.07503448275862	2.15126699853446	0.039844190051963	0.286815911827178	0.253285846300719	PRDX2/TXNRD1/GSTM3/S100A9/PIM1/NNT/PXDNL/RDH11	8
GO:0010906	regulation of glucose metabolic process	7/580	103/18805	0.0679611650485437	2.20346501506528	2.1848086438185	0.0401583069217663	0.287596035077775	0.253974769647014	IGFBP4/TFF3/PMAIP1/IRS1/KAT2A/FOXK2/INSR	7
GO:0046620	regulation of organ growth	7/580	103/18805	0.0679611650485437	2.20346501506528	2.1848086438185	0.0401583069217663	0.287596035077775	0.253974769647014	BASP1/RGS2/FOXP1/PIM1/YAP1/TGFBR3/DUSP6	7
GO:0003085	negative regulation of systemic arterial blood pressure	3/580	25/18805	0.12	3.89068965517241	2.58005538077568	0.0405768228349368	0.287596035077775	0.253974769647014	PRCP/IER3/TNF	3
GO:0007350	blastoderm segmentation	3/580	25/18805	0.12	3.89068965517241	2.58005538077568	0.0405768228349368	0.287596035077775	0.253974769647014	FRS2/BASP1/TDRKH	3
GO:0042537	benzene-containing compound metabolic process	3/580	25/18805	0.12	3.89068965517241	2.58005538077568	0.0405768228349368	0.287596035077775	0.253974769647014	GSTM3/CYP4B1/KYNU	3
GO:0043567	regulation of insulin-like growth factor receptor signaling pathway	3/580	25/18805	0.12	3.89068965517241	2.58005538077568	0.0405768228349368	0.287596035077775	0.253974769647014	IGFBP4/IGFBP2/IGFBP5	3
GO:0061042	vascular wound healing	3/580	25/18805	0.12	3.89068965517241	2.58005538077568	0.0405768228349368	0.287596035077775	0.253974769647014	CXCR4/TNF/SLC12A2	3
GO:0061615	glycolytic process through fructose-6-phosphate	3/580	25/18805	0.12	3.89068965517241	2.58005538077568	0.0405768228349368	0.287596035077775	0.253974769647014	PPP2CA/FOXK2/ENO2	3
GO:0071280	cellular response to copper ion	3/580	25/18805	0.12	3.89068965517241	2.58005538077568	0.0405768228349368	0.287596035077775	0.253974769647014	MT1X/MT1G/MT2A	3
GO:1905709	negative regulation of membrane permeability	3/580	25/18805	0.12	3.89068965517241	2.58005538077568	0.0405768228349368	0.287596035077775	0.253974769647014	IER3/HSPA1A/GCLC	3
GO:0006417	regulation of translation	21/580	451/18805	0.0465631929046563	1.50969110788287	1.95449837510846	0.0408354734620242	0.288686931975529	0.254938135808305	RPL26/ZFP36/IGFBP5/PPP1R15A/ELP2/PPP1R15B/EIF6/YTHDF3/CNOT11/DNAJC1/RGS2/MPV17L2/NANOS1/TIA1/RBM24/TNF/EIF2AK3/NEURL1/EIF5B/FXR1/CASC3	21
GO:0003205	cardiac chamber development	10/580	172/18805	0.0581395348837209	1.88502405773857	2.0800954180812	0.0409187251096202	0.288686931975529	0.254938135808305	FRS2/MED1/FKBP1A/IGF1R/MESP1/FHL2/ZFPM1/MSX2/ROBO2/TGFBR3	10
GO:2000058	regulation of ubiquitin-dependent protein catabolic process	10/580	172/18805	0.0581395348837209	1.88502405773857	2.0800954180812	0.0409187251096202	0.288686931975529	0.254938135808305	SUMO2/TRAF7/CSNK2B/HSPA1A/CLU/ZFAND2A/GCLC/GNA12/TAF9/HSPA1B	10
GO:0071706	tumor necrosis factor superfamily cytokine production	11/580	196/18805	0.0561224489795918	1.81962526389866	2.05772438303282	0.0410490223206178	0.288721902032193	0.254969017708618	ZFP36/DDT/PYCARD/CLU/LTF/RIPK1/FOXP1/NFATC4/FXR1/CYBA/PIK3R1	11
GO:1903555	regulation of tumor necrosis factor superfamily cytokine production	11/580	196/18805	0.0561224489795918	1.81962526389866	2.05772438303282	0.0410490223206178	0.288721902032193	0.254969017708618	ZFP36/DDT/PYCARD/CLU/LTF/RIPK1/FOXP1/NFATC4/FXR1/CYBA/PIK3R1	11
GO:0002833	positive regulation of response to biotic stimulus	20/580	425/18805	0.0470588235294118	1.52576064908722	1.95575810613813	0.0412250840399535	0.289518235018393	0.255672255799776	ESR1/HEXIM1/MED1/PYCARD/HSPA1A/S100A8/CYLD/NEK7/ZDHHC5/LTF/S100A9/PPP2CA/PELI1/TSPAN6/NFKBIZ/TNF/ZCCHC3/CYBA/HSPA1B/PIK3R1	20
GO:0010811	positive regulation of cell-substrate adhesion	8/580	126/18805	0.0634920634920635	2.05856595511768	2.12682488644298	0.0414503962049838	0.290215767957994	0.256288244012578	JUP/EPB41L5/AGR2/PREX1/FBLN2/SKAP1/CEACAM6/NPNT	8
GO:1905037	autophagosome organization	8/580	126/18805	0.0634920634920635	2.05856595511768	2.12682488644298	0.0414503962049838	0.290215767957994	0.256288244012578	AMBRA1/ATP13A2/MAP1LC3B2/CTSD/LRBA/PACS2/PIP4K2B/SNX30	8
GO:0002064	epithelial cell development	12/580	221/18805	0.0542986425339367	1.7604930566391	2.02874349943251	0.0418791167085382	0.291594712119122	0.257505983421203	PGR/IL6ST/SPINT2/FRS2/GSTM3/ESR1/EPB41L5/RAB13/CXCR4/COL18A1/YAP1/TNF	12
GO:0007548	sex differentiation	15/580	296/18805	0.0506756756756757	1.64302772600186	1.98925027400309	0.0418883533360224	0.291594712119122	0.257505983421203	PGR/CEBPB/ESR1/RAB13/TIPARP/TNFSF10/BASP1/ROBO2/SYCP2/IMMP2L/BIK/BMPR1B/NRIP1/INSR/ARID5B	15
GO:0000041	transition metal ion transport	7/580	104/18805	0.0673076923076923	2.18227785145889	2.1568	0.0419638146592095	0.291594712119122	0.257505983421203	SLC30A1/LTF/ATP13A1/STEAP4/SLC46A1/SLC39A1/LCN2	7
GO:0009408	response to heat	7/580	104/18805	0.0673076923076923	2.18227785145889	2.1568	0.0419638146592095	0.291594712119122	0.257505983421203	IER5/PDCD6/BAG3/HSPA1A/GCLC/HSPA2/HSPA1B	7
GO:0072526	pyridine-containing compound catabolic process	7/580	104/18805	0.0673076923076923	2.18227785145889	2.1568	0.0419638146592095	0.291594712119122	0.257505983421203	OGDH/IER3/EIF6/PPP2CA/FOXK2/ENO2/INSR	7
GO:0038066	p38MAPK cascade	5/580	62/18805	0.0806451612903226	2.61471078976641	2.27183292322319	0.0421207195783042	0.291804744507139	0.25769146208175	ZFP36/GADD45A/CYLD/STK39/MAP2K3	5
GO:0051785	positive regulation of nuclear division	5/580	62/18805	0.0806451612903226	2.61471078976641	2.27183292322319	0.0421207195783042	0.291804744507139	0.25769146208175	NUP62/MAD2L1BP/MSX2/TNF/INSR	5
GO:0071774	response to fibroblast growth factor	10/580	173/18805	0.0578034682080925	1.87412796491927	2.0605050234661	0.0422882657218931	0.292525585856999	0.25832803384719	FRS2/ZFP36/IGF1R/CHURC1/IER2/GCLC/CXCL8/EGR3/EXT1/INSR	10
GO:0044058	regulation of digestive system process	4/580	43/18805	0.0930232558139535	3.01603849238172	2.36101546288756	0.0428557617161699	0.293856133596487	0.259503034592765	TYMP/STK39/PTGER3/PPP3CA	4
GO:0140694	membraneless organelle assembly	20/580	427/18805	0.0468384074941452	1.51861422918517	1.93381351799529	0.0429201493816025	0.293856133596487	0.259503034592765	ERAL1/LSM4/G3BP2/PLK2/EIF6/HSPA1A/YTHDF3/NEK7/NUP62/MPV17L2/TIA1/KAT2A/TNF/FARP2/EIF5B/FXR1/RPS28/KRT19/HSPA1B/TNNT1	20
GO:0014823	response to activity	6/580	83/18805	0.072289156626506	2.34378894889904	2.18876603357024	0.04307775856757	0.293856133596487	0.259503034592765	SLC38A2/CXCR4/GCLC/SLC25A25/BLOC1S6/TNF	6
GO:0006090	pyruvate metabolic process	8/580	127/18805	0.062992125984252	2.04235677436872	2.1026085096482	0.0430990055165715	0.293856133596487	0.259503034592765	OGDH/IER3/MPC2/EIF6/PPP2CA/FOXK2/ENO2/INSR	8
GO:0003007	heart morphogenesis	14/580	272/18805	0.0514705882352941	1.66880070993915	1.98204570157215	0.0432890376071698	0.293856133596487	0.259503034592765	MED1/FKBP1A/EFNA1/SNAI1/MESP1/FHL2/ZFPM1/PIM1/MSX2/ROBO2/YAP1/TGFBR3/EXT1/INSR	14
GO:0062197	cellular response to chemical stress	16/580	323/18805	0.0495356037151703	1.60606384114444	1.9599748641614	0.0433406422024669	0.293856133596487	0.259503034592765	EFHD1/PRDX2/PCGF2/PYCARD/ATP13A2/GDF15/PEX2/HSPA1A/MYB/STK39/KLF2/RIPK1/FOXP1/ENDOG/EIF2AK3/HSPA1B	16
GO:0001660	fever generation	2/580	11/18805	0.181818181818182	5.89498432601881	2.89696592129045	0.0434373837593245	0.293856133596487	0.259503034592765	PTGER3/TNF	2
GO:0006983	ER overload response	2/580	11/18805	0.181818181818182	5.89498432601881	2.89696592129045	0.0434373837593245	0.293856133596487	0.259503034592765	PPP1R15B/EIF2AK3	2
GO:0030223	neutrophil differentiation	2/580	11/18805	0.181818181818182	5.89498432601881	2.89696592129045	0.0434373837593245	0.293856133596487	0.259503034592765	LEF1/DHRS7B	2
GO:0046643	regulation of gamma-delta T cell activation	2/580	11/18805	0.181818181818182	5.89498432601881	2.89696592129045	0.0434373837593245	0.293856133596487	0.259503034592765	LEF1/EGR3	2
GO:0061470	T follicular helper cell differentiation	2/580	11/18805	0.181818181818182	5.89498432601881	2.89696592129045	0.0434373837593245	0.293856133596487	0.259503034592765	FOXP1/PIK3R1	2
GO:0097250	mitochondrial respirasome assembly	2/580	11/18805	0.181818181818182	5.89498432601881	2.89696592129045	0.0434373837593245	0.293856133596487	0.259503034592765	HIGD2A/HIGD1A	2
GO:0097646	calcitonin family receptor signaling pathway	2/580	11/18805	0.181818181818182	5.89498432601881	2.89696592129045	0.0434373837593245	0.293856133596487	0.259503034592765	RAMP1/ADM	2
GO:1901329	regulation of odontoblast differentiation	2/580	11/18805	0.181818181818182	5.89498432601881	2.89696592129045	0.0434373837593245	0.293856133596487	0.259503034592765	CEBPB/LEF1	2
GO:2000347	positive regulation of hepatocyte proliferation	2/580	11/18805	0.181818181818182	5.89498432601881	2.89696592129045	0.0434373837593245	0.293856133596487	0.259503034592765	MED1/TNF	2
GO:0006164	purine nucleotide biosynthetic process	11/580	198/18805	0.0555555555555556	1.80124521072797	2.02192579324042	0.0436294214900902	0.294291639641917	0.25988762802966	ATP5MF/ATP5MG/NDUFC2/NDUFA11/NDUFA13/ATP5PO/NME1/SDHA/NDUFB8/DCK/KYNU	11
GO:0030856	regulation of epithelial cell differentiation	10/580	174/18805	0.0574712643678161	1.86335711454618	2.04104398023479	0.0436887670751983	0.294291639641917	0.25988762802966	CEBPB/ZFP36/MED1/MESP1/CDKN1C/LEF1/MSX2/YAP1/TNF/CDKN2B	10
GO:0009191	ribonucleoside diphosphate catabolic process	7/580	105/18805	0.0666666666666667	2.16149425287356	2.12910098585736	0.0438211558051563	0.294291639641917	0.25988762802966	OGDH/IER3/EIF6/PPP2CA/FOXK2/ENO2/INSR	7
GO:0046031	ADP metabolic process	7/580	105/18805	0.0666666666666667	2.16149425287356	2.12910098585736	0.0438211558051563	0.294291639641917	0.25988762802966	OGDH/IER3/EIF6/PPP2CA/FOXK2/ENO2/INSR	7
GO:1990830	cellular response to leukemia inhibitory factor	7/580	105/18805	0.0666666666666667	2.16149425287356	2.12910098585736	0.0438211558051563	0.294291639641917	0.25988762802966	KLF4/SOCS3/TEX14/BCLAF1/EEF1E1/NEFH/ARID5B	7
GO:0009755	hormone-mediated signaling pathway	12/580	223/18805	0.0538116591928251	1.74470388124323	1.99569960102669	0.0443302853940984	0.29476434075377	0.260305068263014	PGR/ESR1/MED1/PRCP/CSNK2B/SCGB2A2/KLF2/FOXP1/ZDHHC7/PIM1/SCGB2A1/PMEPA1	12
GO:0045862	positive regulation of proteolysis	12/580	223/18805	0.0538116591928251	1.74470388124323	1.99569960102669	0.0443302853940984	0.29476434075377	0.260305068263014	EFNA1/SUMO2/TRAF7/HSPA1A/CLU/PSENEN/ZFAND2A/GCLC/RHBDD1/PSMC1/TNF/HSPA1B	12
GO:0045088	regulation of innate immune response	22/580	482/18805	0.045643153526971	1.4798612104736	1.9039091588667	0.0443535197404399	0.29476434075377	0.260305068263014	ESR1/HEXIM1/MED1/PYCARD/HSPA1A/S100A8/YTHDF3/CYLD/NEK7/ZDHHC5/LTF/S100A9/PIM1/PPP2CA/PELI1/TSPAN6/NFKBIZ/TNF/ZCCHC3/CYBA/HSPA1B/PIK3R1	22
GO:0055123	digestive system development	9/580	151/18805	0.0596026490066225	1.93246174925782	2.05229063095747	0.0446015948109693	0.29476434075377	0.260305068263014	IL6ST/EPB41L5/AGR2/CDKN1C/CXCL8/YAP1/TNF/EXT1/INSR	9
GO:0034113	heterotypic cell-cell adhesion	5/580	63/18805	0.0793650793650794	2.5732074438971	2.23127782936716	0.0446405141882536	0.29476434075377	0.260305068263014	KLF4/JUP/SKAP1/CEACAM6/TNF	5
GO:0042692	muscle cell differentiation	20/580	429/18805	0.0466200466200466	1.51153444256893	1.91198017762885	0.0446653407075596	0.29476434075377	0.260305068263014	FRS2/IGFBP5/GDF15/ADM/SORBS2/MESP1/SMYD3/CDK9/FHL2/RGS2/FOXP1/TANC1/EHD1/RBM24/NFATC4/KAT2A/KRT19/PPP3CA/NPNT/TNNT1	20
GO:0021542	dentate gyrus development	3/580	26/18805	0.115384615384615	3.74104774535809	2.4950105881333	0.0448512704294319	0.29476434075377	0.260305068263014	LEF1/BLOC1S6/FXR1	3
GO:0043501	skeletal muscle adaptation	3/580	26/18805	0.115384615384615	3.74104774535809	2.4950105881333	0.0448512704294319	0.29476434075377	0.260305068263014	IGFBP5/PPP3CA/TNNT1	3
GO:0051446	positive regulation of meiotic cell cycle	3/580	26/18805	0.115384615384615	3.74104774535809	2.4950105881333	0.0448512704294319	0.29476434075377	0.260305068263014	OVOL1/MSX2/INSR	3
GO:0062009	secondary palate development	3/580	26/18805	0.115384615384615	3.74104774535809	2.4950105881333	0.0448512704294319	0.29476434075377	0.260305068263014	ITGB6/LEF1/TGFBR3	3
GO:0071276	cellular response to cadmium ion	3/580	26/18805	0.115384615384615	3.74104774535809	2.4950105881333	0.0448512704294319	0.29476434075377	0.260305068263014	MT1X/MT1G/MT2A	3
GO:0072576	liver morphogenesis	3/580	26/18805	0.115384615384615	3.74104774535809	2.4950105881333	0.0448512704294319	0.29476434075377	0.260305068263014	CEBPB/MED1/TNF	3
GO:0090128	regulation of synapse maturation	3/580	26/18805	0.115384615384615	3.74104774535809	2.4950105881333	0.0448512704294319	0.29476434075377	0.260305068263014	NFATC4/DAB1/NEURL1	3
GO:1900078	positive regulation of cellular response to insulin stimulus	3/580	26/18805	0.115384615384615	3.74104774535809	2.4950105881333	0.0448512704294319	0.29476434075377	0.260305068263014	CTSD/IRS1/NUCKS1	3
GO:1900227	positive regulation of NLRP3 inflammasome complex assembly	3/580	26/18805	0.115384615384615	3.74104774535809	2.4950105881333	0.0448512704294319	0.29476434075377	0.260305068263014	NEK7/ZDHHC5/PPP2CA	3
GO:0032271	regulation of protein polymerization	11/580	199/18805	0.0552763819095477	1.79219372725697	2.00418025272168	0.0449605528766604	0.295061634049536	0.260567606640115	AMBRA1/ARPC3/SPTAN1/BAIAP2L1/ADD3/PYCARD/PREX1/HSPA1A/PFN2/MAP1B/HSPA1B	11
GO:0009266	response to temperature stimulus	10/580	175/18805	0.0571428571428571	1.85270935960591	2.02171054535619	0.0451204751147205	0.295689941470152	0.261122462107351	IER5/PDCD6/BAG3/HSPA1A/CXCR4/GCLC/HSPA2/PCSK1N/EIF2AK3/HSPA1B	10
GO:0001822	kidney development	16/580	325/18805	0.0492307692307692	1.59618037135279	1.93407681949451	0.0453845494103986	0.296998038542197	0.262277636769125	MYC/OVOL1/TFAP2B/TIPARP/CDKN1C/BASP1/GPC3/ROBO2/BLOC1S6/HOXB7/GCNT3/YAP1/EXT1/PPP3CA/NPNT/ARID5B	16
GO:0006835	dicarboxylic acid transport	7/580	106/18805	0.0660377358490566	2.14110279765777	2.10171518241135	0.0457307017512594	0.297993412967542	0.26315664746314	ARL6IP1/SLC38A2/ABAT/SLC19A2/SLC46A1/TNF/SLC12A2	7
GO:0032526	response to retinoic acid	7/580	106/18805	0.0660377358490566	2.14110279765777	2.10171518241135	0.0457307017512594	0.297993412967542	0.26315664746314	KLF4/IGFBP2/NDUFA13/MYB/GDAP1/YAP1/TNF	7
GO:2000060	positive regulation of ubiquitin-dependent protein catabolic process	7/580	106/18805	0.0660377358490566	2.14110279765777	2.10171518241135	0.0457307017512594	0.297993412967542	0.26315664746314	SUMO2/TRAF7/HSPA1A/CLU/ZFAND2A/GCLC/HSPA1B	7
GO:0010828	positive regulation of D-glucose transmembrane transport	4/580	44/18805	0.0909090909090909	2.9474921630094	2.30716903725762	0.0460362883107287	0.298717155278207	0.263795781054064	IRS1/GPC3/INSR/PIK3R1	4
GO:0051084	'de novo' post-translational protein folding	4/580	44/18805	0.0909090909090909	2.9474921630094	2.30716903725762	0.0460362883107287	0.298717155278207	0.263795781054064	HSPE1/HSPA1A/HSPA2/HSPA1B	4
GO:0071364	cellular response to epidermal growth factor stimulus	4/580	44/18805	0.0909090909090909	2.9474921630094	2.30716903725762	0.0460362883107287	0.298717155278207	0.263795781054064	ZFP36/MED1/GAREM1/BLOC1S6	4
GO:0061136	regulation of proteasomal protein catabolic process	11/580	200/18805	0.055	1.78323275862069	1.98653560636419	0.0463192525926573	0.300130515744546	0.265043913347576	SUMO2/CSNK2B/HSPA1A/CLU/ZFAND2A/GCLC/F8A1/GNA12/TAF9/PSMC1/HSPA1B	11
GO:0003206	cardiac chamber morphogenesis	8/580	129/18805	0.062015503875969	2.01069232825448	2.05483635686595	0.0465247476155362	0.300616426738815	0.26547301916889	MED1/FKBP1A/MESP1/FHL2/ZFPM1/MSX2/ROBO2/TGFBR3	8
GO:0039531	regulation of cytoplasmic pattern recognition receptor signaling pathway	8/580	129/18805	0.062015503875969	2.01069232825448	2.05483635686595	0.0465247476155362	0.300616426738815	0.26547301916889	HSPA1A/NEK7/ZDHHC5/PPP2CA/PELI1/TSPAN6/ZCCHC3/HSPA1B	8
GO:0002763	positive regulation of myeloid leukocyte differentiation	5/580	64/18805	0.078125	2.53300107758621	2.19149970402027	0.0472485945142993	0.304439545352974	0.268849198082836	KLF10/LEF1/RIPK1/TNF/PPP3CA	5
GO:0033619	membrane protein proteolysis	5/580	64/18805	0.078125	2.53300107758621	2.19149970402027	0.0472485945142993	0.304439545352974	0.268849198082836	TSPAN15/PSENEN/TIMP3/RHBDD1/TNF	5
GO:0006970	response to osmotic stress	6/580	85/18805	0.0705882352941176	2.28864097363083	2.12419228058132	0.0474623567147241	0.304539104992665	0.268937118754447	EFHD1/TSC22D3/PYCARD/STK39/TNF/SLC12A2	6
GO:0070227	lymphocyte apoptotic process	6/580	85/18805	0.0705882352941176	2.28864097363083	2.12419228058132	0.0474623567147241	0.304539104992665	0.268937118754447	TSC22D3/EFNA1/BCL6/RIPK1/FOXP1/NFKBIZ	6
GO:2000514	regulation of CD4-positive, alpha-beta T cell activation	6/580	85/18805	0.0705882352941176	2.28864097363083	2.12419228058132	0.0474623567147241	0.304539104992665	0.268937118754447	BRD2/BCL6/JUNB/SOCS1/LGALS1/NFKBIZ	6
GO:1901222	regulation of non-canonical NF-kappaB signal transduction	7/580	107/18805	0.0654205607476635	2.12109249113761	2.07463215319923	0.0476927946764538	0.30525036572008	0.269565229915143	NDUFC2/PYCARD/CYLD/NLRP2/RIPK1/TNF/RTKN2	7
GO:0000302	response to reactive oxygen species	11/580	201/18805	0.054726368159204	1.77436095385143	1.9689906731654	0.0477057224481133	0.30525036572008	0.269565229915143	PRDX2/S100A7/PCGF2/PEX2/PPP1R15B/MYB/KLF2/RIPK1/FOXP1/ENDOG/AREG	11
GO:0030216	keratinocyte differentiation	10/580	177/18805	0.0564971751412429	1.83177479057082	1.98341969656302	0.0480784493187993	0.30586693232054	0.270109717116719	ZFP36/MED1/S100A7/KRT7/MAFB/MSX2/CSTA/YAP1/NFKBIZ/PPP3CA	10
GO:0060541	respiratory system development	12/580	226/18805	0.0530973451327434	1.72154409520903	1.94675490999592	0.0481906617159948	0.30586693232054	0.270109717116719	PGR/IGFBP5/AGR2/ITGB6/KLF2/BASP1/LEF1/GPC3/BLOC1S6/YAP1/TNF/EXT1	12
GO:0002274	myeloid leukocyte activation	13/580	251/18805	0.051792828685259	1.67924852314878	1.93264522020712	0.0482005516158019	0.30586693232054	0.270109717116719	CRTC3/PYCARD/PREX1/ITGB6/CLU/STK39/VAMP2/RHOH/FOXP1/MT1G/CXCL8/TNF/MYO18A	13
GO:0008654	phospholipid biosynthetic process	13/580	251/18805	0.051792828685259	1.67924852314878	1.93264522020712	0.0482005516158019	0.30586693232054	0.270109717116719	MBOAT1/SERINC5/PIP4K2B/IMPA2/OCRL/FAR1/PIGN/MFSD2A/PIK3C2G/DHRS7B/SRD5A3/SPTLC2/PIK3R1	13
GO:0051656	establishment of organelle localization	22/580	487/18805	0.0451745379876797	1.46466756354882	1.8534170766094	0.0486365307153861	0.30586693232054	0.270109717116719	STARD3/PDCD6/YKT6/ATP13A2/EXOC2/TEX14/EIF6/MX1/EXOC4/TRAPPC10/NUP62/BLOC1S1/SEH1L/F8A1/BLOC1S6/NEFH/MAP1B/TRAPPC9/HTT/COPS5/HOOK3/TRAPPC1	22
GO:0001783	B cell apoptotic process	3/580	27/18805	0.111111111111111	3.60249042145594	2.4140802555007	0.0493396414666498	0.30586693232054	0.270109717116719	BCL6/FOXP1/NFKBIZ	3
GO:0006972	hyperosmotic response	3/580	27/18805	0.111111111111111	3.60249042145594	2.4140802555007	0.0493396414666498	0.30586693232054	0.270109717116719	EFHD1/STK39/SLC12A2	3
GO:0032925	regulation of activin receptor signaling pathway	3/580	27/18805	0.111111111111111	3.60249042145594	2.4140802555007	0.0493396414666498	0.30586693232054	0.270109717116719	FKBP1A/CSNK2B/IGSF1	3
GO:0042104	positive regulation of activated T cell proliferation	3/580	27/18805	0.111111111111111	3.60249042145594	2.4140802555007	0.0493396414666498	0.30586693232054	0.270109717116719	IGFBP2/PYCARD/PPP3CA	3
GO:0060396	growth hormone receptor signaling pathway	3/580	27/18805	0.111111111111111	3.60249042145594	2.4140802555007	0.0493396414666498	0.30586693232054	0.270109717116719	GDF15/LEPROT/PIK3R1	3
GO:0070102	interleukin-6-mediated signaling pathway	3/580	27/18805	0.111111111111111	3.60249042145594	2.4140802555007	0.0493396414666498	0.30586693232054	0.270109717116719	IL6ST/RIPK1/YAP1	3
GO:0141087	positive regulation of inflammasome-mediated signaling pathway	3/580	27/18805	0.111111111111111	3.60249042145594	2.4140802555007	0.0493396414666498	0.30586693232054	0.270109717116719	NEK7/ZDHHC5/PPP2CA	3
GO:2000737	negative regulation of stem cell differentiation	3/580	27/18805	0.111111111111111	3.60249042145594	2.4140802555007	0.0493396414666498	0.30586693232054	0.270109717116719	CDK12/ZFP36/YAP1	3
GO:0120178	steroid hormone biosynthetic process	4/580	45/18805	0.0888888888888889	2.88199233716475	2.25482603247879	0.0493447428621012	0.30586693232054	0.270109717116719	STARD3/MED1/ADM/SRD5A3	4
GO:1901016	regulation of potassium ion transmembrane transporter activity	4/580	45/18805	0.0888888888888889	2.88199233716475	2.25482603247879	0.0493447428621012	0.30586693232054	0.270109717116719	KCNE4/STK39/VAMP2/LRRC26	4
GO:0006626	protein targeting to mitochondrion	7/580	108/18805	0.0648148148148148	2.1014527458493	2.04784524100043	0.0497077472825983	0.30586693232054	0.270109717116719	BAG3/NDUFA13/LEPROT/DNAJC15/IMMP2L/GDAP1/RHOU	7
GO:0009134	nucleoside diphosphate catabolic process	7/580	108/18805	0.0648148148148148	2.1014527458493	2.04784524100043	0.0497077472825983	0.30586693232054	0.270109717116719	OGDH/IER3/EIF6/PPP2CA/FOXK2/ENO2/INSR	7
GO:0019751	polyol metabolic process	7/580	108/18805	0.0648148148148148	2.1014527458493	2.04784524100043	0.0497077472825983	0.30586693232054	0.270109717116719	SPTSSA/SPTSSB/NUDT4/IMPA2/OCRL/SORD/SPTLC2	7
GO:0001756	somitogenesis	5/580	65/18805	0.0769230769230769	2.49403183023873	2.15246988888816	0.049945192686745	0.30586693232054	0.270109717116719	EPB41L5/MESP1/LEF1/KAT2A/NRARP	5
GO:0006518	peptide metabolic process	5/580	65/18805	0.0769230769230769	2.49403183023873	2.15246988888816	0.049945192686745	0.30586693232054	0.270109717116719	CPD/PAM/GCLC/BLOC1S6/PGLYRP2	5
GO:0021545	cranial nerve development	5/580	65/18805	0.0769230769230769	2.49403183023873	2.15246988888816	0.049945192686745	0.30586693232054	0.270109717116719	MAFB/KCNC2/HOXB3/EXT1/ERBB3	5
GO:0032757	positive regulation of interleukin-8 production	5/580	65/18805	0.0769230769230769	2.49403183023873	2.15246988888816	0.049945192686745	0.30586693232054	0.270109717116719	PYCARD/HSPA1A/RIPK1/TNF/HSPA1B	5
GO:0006888	endoplasmic reticulum to Golgi vesicle-mediated transport	8/580	131/18805	0.0610687022900763	1.9799947354567	2.00791841528826	0.0501238559743654	0.30586693232054	0.270109717116719	PDCD6/YKT6/RABGGTB/TRAPPC10/IER3IP1/BCAP29/TRAPPC9/TRAPPC1	8
GO:0030323	respiratory tube development	11/580	203/18805	0.0541871921182266	1.75687956514354	1.93419532136633	0.0505627447396727	0.30586693232054	0.270109717116719	PGR/TRAF4/IGFBP5/AGR2/ITGB6/KLF2/GPC3/BLOC1S6/YAP1/TNF/EXT1	11
GO:0031099	regeneration	11/580	203/18805	0.0541871921182266	1.75687956514354	1.93419532136633	0.0505627447396727	0.30586693232054	0.270109717116719	CEBPB/KLF4/MED1/CERS2/IGF1R/ADM/YAP1/MAP1B/TNF/TGFBR3/PPP3CA	11
GO:0001547	antral ovarian follicle growth	2/580	12/18805	0.166666666666667	5.40373563218391	2.72219451719411	0.0510818399670124	0.30586693232054	0.270109717116719	ESR1/BMPR1B	2
GO:0009174	pyrimidine ribonucleoside monophosphate biosynthetic process	2/580	12/18805	0.166666666666667	5.40373563218391	2.72219451719411	0.0510818399670124	0.30586693232054	0.270109717116719	UCK2/DCK	2
GO:0030656	regulation of vitamin metabolic process	2/580	12/18805	0.166666666666667	5.40373563218391	2.72219451719411	0.0510818399670124	0.30586693232054	0.270109717116719	SNAI1/TNF	2
GO:0031126	sno(s)RNA 3'-end processing	2/580	12/18805	0.166666666666667	5.40373563218391	2.72219451719411	0.0510818399670124	0.30586693232054	0.270109717116719	EXOSC6/LARP7	2
GO:0031293	membrane protein intracellular domain proteolysis	2/580	12/18805	0.166666666666667	5.40373563218391	2.72219451719411	0.0510818399670124	0.30586693232054	0.270109717116719	PSENEN/RHBDD1	2
GO:0038026	reelin-mediated signaling pathway	2/580	12/18805	0.166666666666667	5.40373563218391	2.72219451719411	0.0510818399670124	0.30586693232054	0.270109717116719	RNF7/DAB1	2
GO:0042117	monocyte activation	2/580	12/18805	0.166666666666667	5.40373563218391	2.72219451719411	0.0510818399670124	0.30586693232054	0.270109717116719	FOXP1/MT1G	2
GO:0043476	pigment accumulation	2/580	12/18805	0.166666666666667	5.40373563218391	2.72219451719411	0.0510818399670124	0.30586693232054	0.270109717116719	SHROOM3/BLOC1S6	2
GO:0043482	cellular pigment accumulation	2/580	12/18805	0.166666666666667	5.40373563218391	2.72219451719411	0.0510818399670124	0.30586693232054	0.270109717116719	SHROOM3/BLOC1S6	2
GO:0043517	positive regulation of DNA damage response, signal transduction by p53 class mediator	2/580	12/18805	0.166666666666667	5.40373563218391	2.72219451719411	0.0510818399670124	0.30586693232054	0.270109717116719	PMAIP1/EEF1E1	2
GO:0050847	progesterone receptor signaling pathway	2/580	12/18805	0.166666666666667	5.40373563218391	2.72219451719411	0.0510818399670124	0.30586693232054	0.270109717116719	PGR/ZDHHC7	2
GO:0051798	positive regulation of hair follicle development	2/580	12/18805	0.166666666666667	5.40373563218391	2.72219451719411	0.0510818399670124	0.30586693232054	0.270109717116719	MSX2/TNF	2
GO:0060442	branching involved in prostate gland morphogenesis	2/580	12/18805	0.166666666666667	5.40373563218391	2.72219451719411	0.0510818399670124	0.30586693232054	0.270109717116719	FRS2/ESR1	2
GO:0061909	autophagosome-lysosome fusion	2/580	12/18805	0.166666666666667	5.40373563218391	2.72219451719411	0.0510818399670124	0.30586693232054	0.270109717116719	ATP13A2/PIP4K2B	2
GO:0070673	response to interleukin-18	2/580	12/18805	0.166666666666667	5.40373563218391	2.72219451719411	0.0510818399670124	0.30586693232054	0.270109717116719	CYLD/PIK3R1	2
GO:0097067	cellular response to thyroid hormone stimulus	2/580	12/18805	0.166666666666667	5.40373563218391	2.72219451719411	0.0510818399670124	0.30586693232054	0.270109717116719	MED1/GCLC	2
GO:0097084	vascular associated smooth muscle cell development	2/580	12/18805	0.166666666666667	5.40373563218391	2.72219451719411	0.0510818399670124	0.30586693232054	0.270109717116719	ADM/NFATC4	2
GO:1901678	iron coordination entity transport	2/580	12/18805	0.166666666666667	5.40373563218391	2.72219451719411	0.0510818399670124	0.30586693232054	0.270109717116719	SLC46A1/LCN2	2
GO:1901862	negative regulation of muscle tissue development	2/580	12/18805	0.166666666666667	5.40373563218391	2.72219451719411	0.0510818399670124	0.30586693232054	0.270109717116719	IGFBP5/LEF1	2
GO:1903898	negative regulation of PERK-mediated unfolded protein response	2/580	12/18805	0.166666666666667	5.40373563218391	2.72219451719411	0.0510818399670124	0.30586693232054	0.270109717116719	PPP1R15A/PPP1R15B	2
GO:1905165	regulation of lysosomal protein catabolic process	2/580	12/18805	0.166666666666667	5.40373563218391	2.72219451719411	0.0510818399670124	0.30586693232054	0.270109717116719	ATP13A2/USP8	2
GO:2000009	negative regulation of protein localization to cell surface	2/580	12/18805	0.166666666666667	5.40373563218391	2.72219451719411	0.0510818399670124	0.30586693232054	0.270109717116719	LEPROT/ASTN2	2
GO:2000321	positive regulation of T-helper 17 cell differentiation	2/580	12/18805	0.166666666666667	5.40373563218391	2.72219451719411	0.0510818399670124	0.30586693232054	0.270109717116719	BRD2/NFKBIZ	2
GO:0032006	regulation of TOR signaling	9/580	155/18805	0.0580645161290323	1.88259176863181	1.9683016353192	0.051121670910965	0.30586693232054	0.270109717116719	PDCD6/PREX1/PIM1/SEH1L/USP32/ENDOG/WDR24/GNA12/PELI1	9
GO:0072073	kidney epithelium development	9/580	155/18805	0.0580645161290323	1.88259176863181	1.9683016353192	0.051121670910965	0.30586693232054	0.270109717116719	MYC/TFAP2B/BASP1/GPC3/ROBO2/HOXB7/YAP1/EXT1/NPNT	9
GO:0007015	actin filament organization	21/580	463/18805	0.0453563714902808	1.4705630446116	1.82890150637333	0.0513329364571779	0.306732604744771	0.27087418855484	ARPC3/SPTAN1/BAIAP2L1/SHROOM3/ADD3/PYCARD/PREX1/RND3/CAP2/RND1/TPM4/RHOH/MYO1D/ARPC1A/PFN2/BLOC1S6/RHOU/ARPC1B/PDLIM1/PIK3R1/LIMCH1	21
GO:0032496	response to lipopolysaccharide	17/580	357/18805	0.0476190476190476	1.54392446633826	1.85098716343057	0.0517496000620081	0.308578663278431	0.272504434572364	CEBPB/PRDX2/ZFP36/S100A7/LDOC1/PYCARD/ADM/S100A8/LTF/PRPF8/FOXP1/PELI1/CXCL8/NFKBIZ/TNF/MAP2K3/CNP	17
GO:0014896	muscle hypertrophy	7/580	109/18805	0.0642201834862385	2.08217336285985	2.02134799771795	0.0517758425687491	0.308578663278431	0.272504434572364	IL6ST/IGFBP5/SORBS2/RGS2/FOXP1/PPP3CA/CYBA	7
GO:0001558	regulation of cell growth	19/580	410/18805	0.0463414634146341	1.50250210260723	1.83520787912865	0.0518682604325373	0.308730072109431	0.272638143032445	IGFBP4/RERG/IGFBP5/BCL6/DCUN1D5/HSPA1A/S100A8/CXCR4/TSPYL2/S100A9/RGS2/FOXP1/NANOS1/YAP1/ITSN2/MAP1B/MFSD2A/OSGIN1/HSPA1B	19
GO:0031100	animal organ regeneration	5/580	66/18805	0.0757575757575758	2.4562434691745	2.11416122045516	0.0527304516026792	0.311581573704908	0.275156291311727	CEBPB/MED1/ADM/TNF/TGFBR3	5
GO:0070059	intrinsic apoptotic signaling pathway in response to endoplasmic reticulum stress	5/580	66/18805	0.0757575757575758	2.4562434691745	2.11416122045516	0.0527304516026792	0.311581573704908	0.275156291311727	CEBPB/PMAIP1/PPP1R15A/HSPA1A/EIF2AK3	5
GO:0019362	pyridine nucleotide metabolic process	10/580	180/18805	0.0555555555555556	1.80124521072797	1.92689880774952	0.0527550766682986	0.311581573704908	0.275156291311727	OGDH/IER3/EIF6/NNT/PPP2CA/FOXK2/FMO5/KYNU/ENO2/INSR	10
GO:0046496	nicotinamide nucleotide metabolic process	10/580	180/18805	0.0555555555555556	1.80124521072797	1.92689880774952	0.0527550766682986	0.311581573704908	0.275156291311727	OGDH/IER3/EIF6/NNT/PPP2CA/FOXK2/FMO5/KYNU/ENO2/INSR	10
GO:0044546	NLRP3 inflammasome complex assembly	4/580	46/18805	0.0869565217391304	2.81934032983508	2.20390753860972	0.0527806782239362	0.311581573704908	0.275156291311727	PYCARD/NEK7/ZDHHC5/PPP2CA	4
GO:1990000	amyloid fibril formation	4/580	46/18805	0.0869565217391304	2.81934032983508	2.20390753860972	0.0527806782239362	0.311581573704908	0.275156291311727	FKBP1A/CLU/RIPK1/USP8	4
GO:0072523	purine-containing compound catabolic process	9/580	156/18805	0.0576923076923077	1.87052387267905	1.94769325232036	0.0528443996486316	0.311581573704908	0.275156291311727	OGDH/IER3/EIF6/NUDT4/PPP2CA/FOXK2/PDE7A/ENO2/INSR	9
GO:0010586	miRNA metabolic process	7/580	110/18805	0.0636363636363636	2.06324451410658	1.99513417592091	0.0538973336435905	0.311581573704908	0.275156291311727	KLF4/MYC/ESR1/MYB/NFATC4/XPO5/TNF	7
GO:0032760	positive regulation of tumor necrosis factor production	7/580	110/18805	0.0636363636363636	2.06324451410658	1.99513417592091	0.0538973336435905	0.311581573704908	0.275156291311727	DDT/PYCARD/CLU/RIPK1/NFATC4/CYBA/PIK3R1	7
GO:0072676	lymphocyte migration	7/580	110/18805	0.0636363636363636	2.06324451410658	1.99513417592091	0.0538973336435905	0.311581573704908	0.275156291311727	S100A7/PYCARD/STK39/CKLF/ECM1/EXT1/SLC12A2	7
GO:0090398	cellular senescence	7/580	110/18805	0.0636363636363636	2.06324451410658	1.99513417592091	0.0538973336435905	0.311581573704908	0.275156291311727	BCL6/IGF1R/PLK2/EEF1E1/NUP62/CDKN2B/MAP2K3	7
GO:0038061	non-canonical NF-kappaB signal transduction	8/580	133/18805	0.0601503759398496	1.95022037853254	1.96182421507053	0.0538984633799382	0.311581573704908	0.275156291311727	NDUFC2/PYCARD/AMFR/CYLD/NLRP2/RIPK1/TNF/RTKN2	8
GO:0045834	positive regulation of lipid metabolic process	8/580	133/18805	0.0601503759398496	1.95022037853254	1.96182421507053	0.0538984633799382	0.311581573704908	0.275156291311727	ELOVL5/IGF1R/GDF15/ADM/MID1IP1/IRS1/MFSD2A/TNF	8
GO:0002675	positive regulation of acute inflammatory response	3/580	28/18805	0.107142857142857	3.47383004926108	2.33690534880901	0.0540381327089693	0.311581573704908	0.275156291311727	IL6ST/PTGER3/TNF	3
GO:0003272	endocardial cushion formation	3/580	28/18805	0.107142857142857	3.47383004926108	2.33690534880901	0.0540381327089693	0.311581573704908	0.275156291311727	SNAI1/MSX2/ROBO2	3
GO:0003416	endochondral bone growth	3/580	28/18805	0.107142857142857	3.47383004926108	2.33690534880901	0.0540381327089693	0.311581573704908	0.275156291311727	MSX2/ECM1/EXT1	3
GO:0010818	T cell chemotaxis	3/580	28/18805	0.107142857142857	3.47383004926108	2.33690534880901	0.0540381327089693	0.311581573704908	0.275156291311727	S100A7/STK39/SLC12A2	3
GO:0030325	adrenal gland development	3/580	28/18805	0.107142857142857	3.47383004926108	2.33690534880901	0.0540381327089693	0.311581573704908	0.275156291311727	CDKN1C/INSR/ARID5B	3
GO:0035116	embryonic hindlimb morphogenesis	3/580	28/18805	0.107142857142857	3.47383004926108	2.33690534880901	0.0540381327089693	0.311581573704908	0.275156291311727	MED1/MSX2/GPC3	3
GO:0044342	type B pancreatic cell proliferation	3/580	28/18805	0.107142857142857	3.47383004926108	2.33690534880901	0.0540381327089693	0.311581573704908	0.275156291311727	IGFBP4/IGFBP5/RAF1	3
GO:0050995	negative regulation of lipid catabolic process	3/580	28/18805	0.107142857142857	3.47383004926108	2.33690534880901	0.0540381327089693	0.311581573704908	0.275156291311727	CRTC3/MFSD2A/TNF	3
GO:0051043	regulation of membrane protein ectodomain proteolysis	3/580	28/18805	0.107142857142857	3.47383004926108	2.33690534880901	0.0540381327089693	0.311581573704908	0.275156291311727	TSPAN15/TIMP3/TNF	3
GO:0071378	cellular response to growth hormone stimulus	3/580	28/18805	0.107142857142857	3.47383004926108	2.33690534880901	0.0540381327089693	0.311581573704908	0.275156291311727	GDF15/LEPROT/PIK3R1	3
GO:1902894	negative regulation of miRNA transcription	3/580	28/18805	0.107142857142857	3.47383004926108	2.33690534880901	0.0540381327089693	0.311581573704908	0.275156291311727	ESR1/NFATC4/TNF	3
GO:1902993	positive regulation of amyloid precursor protein catabolic process	3/580	28/18805	0.107142857142857	3.47383004926108	2.33690534880901	0.0540381327089693	0.311581573704908	0.275156291311727	EFNA1/CLU/TNF	3
GO:0006900	vesicle budding from membrane	6/580	88/18805	0.0681818181818182	2.21061912225705	2.0306547668426	0.0545392235232236	0.312890081859024	0.276311828998235	PDCD6/MX1/TRAPPC10/TRAPPC9/MYO18A/TRAPPC1	6
GO:0007422	peripheral nervous system development	6/580	88/18805	0.0681818181818182	2.21061912225705	2.0306547668426	0.0545392235232236	0.312890081859024	0.276311828998235	GSTM3/PMP22/NEFH/RAF1/EGR3/ERBB3	6
GO:0046209	nitric oxide metabolic process	6/580	88/18805	0.0681818181818182	2.21061912225705	2.0306547668426	0.0545392235232236	0.312890081859024	0.276311828998235	KLF4/ESR1/CLU/KLF2/TNF/INSR	6
GO:0031647	regulation of protein stability	18/580	386/18805	0.0466321243523316	1.51192603180275	1.81289725855036	0.0545942640402421	0.312890081859024	0.276311828998235	BAG3/EFNA1/PYCARD/PEX2/HSPA1A/CLU/NAA30/PIM1/USP24/PFN2/HOXB-AS3/KAT2A/TAF9/HTT/USP8/TSPAN1/HSPA1B/PIK3R1	18
GO:0009152	purine ribonucleotide biosynthetic process	9/580	157/18805	0.0573248407643312	1.85860970788491	1.92723573599714	0.0546046507086293	0.312890081859024	0.276311828998235	ATP5MF/ATP5MG/NDUFC2/NDUFA11/NDUFA13/ATP5PO/NME1/SDHA/NDUFB8	9
GO:0006893	Golgi to plasma membrane transport	5/580	67/18805	0.0746268656716418	2.41958311888832	2.07654793036361	0.0556044260415638	0.317041572739461	0.279977991988853	RAB13/EXOC2/EXOC4/NSF/VAMP2	5
GO:0030219	megakaryocyte differentiation	5/580	67/18805	0.0746268656716418	2.41958311888832	2.07654793036361	0.0556044260415638	0.317041572739461	0.279977991988853	MED1/EIF6/MYB/ZFPM1/CDKN2B	5
GO:0034605	cellular response to heat	5/580	67/18805	0.0746268656716418	2.41958311888832	2.07654793036361	0.0556044260415638	0.317041572739461	0.279977991988853	IER5/PDCD6/BAG3/HSPA1A/HSPA1B	5
GO:0042446	hormone biosynthetic process	5/580	67/18805	0.0746268656716418	2.41958311888832	2.07654793036361	0.0556044260415638	0.317041572739461	0.279977991988853	STARD3/MED1/IGF1R/ADM/SRD5A3	5
GO:0031214	biomineral tissue development	10/580	182/18805	0.0549450549450549	1.78145130731338	1.88981000528456	0.0560349234132745	0.318527432247007	0.281290147860734	CEBPB/KLF10/ITGB6/LTF/TUFT1/MSX2/GPC3/ECM1/EIF2AK3/BMPR1B	10
GO:0002526	acute inflammatory response	7/580	111/18805	0.0630630630630631	2.04465672569121	1.96919772080334	0.0560724435754988	0.318527432247007	0.281290147860734	IL6ST/CEBPB/PRCP/SERPINA1/PTGER3/TNF/EXT1	7
GO:0090100	positive regulation of transmembrane receptor protein serine/threonine kinase signaling pathway	7/580	111/18805	0.0630630630630631	2.04465672569121	1.96919772080334	0.0560724435754988	0.318527432247007	0.281290147860734	CSNK2B/CDKN1C/MSX2/GPC3/TGFBR3/CDKN2B/NPNT	7
GO:0032941	secretion by tissue	4/580	47/18805	0.0851063829787234	2.75935436537051	2.15434044911386	0.0563434681572957	0.31888741744553	0.28160804917619	AGR2/STK39/PPP3CA/CYBA	4
GO:0045840	positive regulation of mitotic nuclear division	4/580	47/18805	0.0851063829787234	2.75935436537051	2.15434044911386	0.0563434681572957	0.31888741744553	0.28160804917619	NUP62/MAD2L1BP/TNF/INSR	4
GO:0048247	lymphocyte chemotaxis	4/580	47/18805	0.0851063829787234	2.75935436537051	2.15434044911386	0.0563434681572957	0.31888741744553	0.28160804917619	S100A7/STK39/CKLF/SLC12A2	4
GO:0033627	cell adhesion mediated by integrin	6/580	89/18805	0.0674157303370786	2.18578070515304	2.00031418125367	0.0570324537815123	0.321601609022555	0.284004939593564	EFNA1/ITGB6/SKAP1/EXT1/NPNT/MUC1	6
GO:0043543	protein acylation	6/580	89/18805	0.0674157303370786	2.18578070515304	2.00031418125367	0.0570324537815123	0.321601609022555	0.284004939593564	HINT2/ZDHHC5/BLOC1S1/CDYL/ZDHHC7/KAT2A	6
GO:1902117	positive regulation of organelle assembly	6/580	89/18805	0.0674157303370786	2.18578070515304	2.00031418125367	0.0570324537815123	0.321601609022555	0.284004939593564	G3BP2/NUP62/PIP4K2B/SNX30/TNF/HTT	6
GO:1901136	carbohydrate derivative catabolic process	13/580	258/18805	0.0503875968992248	1.63368751670676	1.82832550800281	0.0575153253722097	0.323335757970463	0.28553635875746	OGDH/IER3/EIF6/TYMP/CHI3L2/NUDT4/PPP2CA/IDS/FOXK2/PGLYRP2/PDE7A/ENO2/INSR	13
GO:0043401	steroid hormone receptor signaling pathway	8/580	135/18805	0.0592592592592593	1.9213282247765	1.91652483224238	0.0578503890065363	0.323335757970463	0.28553635875746	PGR/ESR1/MED1/SCGB2A2/FOXP1/ZDHHC7/SCGB2A1/PMEPA1	8
GO:0072001	renal system development	16/580	336/18805	0.0476190476190476	1.54392446633826	1.79470012021781	0.0578574851563345	0.323335757970463	0.28553635875746	MYC/OVOL1/TFAP2B/TIPARP/CDKN1C/BASP1/GPC3/ROBO2/BLOC1S6/HOXB7/GCNT3/YAP1/EXT1/PPP3CA/NPNT/ARID5B	16
GO:0014013	regulation of gliogenesis	7/580	112/18805	0.0625	2.02640086206897	1.9435327625353	0.0583013652796607	0.323335757970463	0.28553635875746	IL6ST/CERS2/MYB/CXCR4/DAB1/TNF/CDKN2B	7
GO:1904659	D-glucose transmembrane transport	7/580	112/18805	0.0625	2.02640086206897	1.9435327625353	0.0583013652796607	0.323335757970463	0.28553635875746	PEA15/ZDHHC7/IRS1/GPC3/TNF/INSR/PIK3R1	7
GO:0055021	regulation of cardiac muscle tissue growth	5/580	68/18805	0.0735294117647059	2.38400101419878	2.03960555382112	0.0585670839188098	0.323335757970463	0.28553635875746	RGS2/FOXP1/PIM1/YAP1/TGFBR3	5
GO:0003156	regulation of animal organ formation	3/580	29/18805	0.103448275862069	3.35404280618312	2.2631699397978	0.0589425598458634	0.323335757970463	0.28553635875746	FRS2/MESP1/ROBO2	3
GO:0035872	nucleotide-binding domain, leucine rich repeat containing receptor signaling pathway	3/580	29/18805	0.103448275862069	3.35404280618312	2.2631699397978	0.0589425598458634	0.323335757970463	0.28553635875746	HSPA1A/CYLD/HSPA1B	3
GO:0060479	lung cell differentiation	3/580	29/18805	0.103448275862069	3.35404280618312	2.2631699397978	0.0589425598458634	0.323335757970463	0.28553635875746	AGR2/KLF2/YAP1	3
GO:0060487	lung epithelial cell differentiation	3/580	29/18805	0.103448275862069	3.35404280618312	2.2631699397978	0.0589425598458634	0.323335757970463	0.28553635875746	AGR2/KLF2/YAP1	3
GO:0071480	cellular response to gamma radiation	3/580	29/18805	0.103448275862069	3.35404280618312	2.2631699397978	0.0589425598458634	0.323335757970463	0.28553635875746	RPL26/YAP1/TSPYL5	3
GO:0002357	defense response to tumor cell	2/580	13/18805	0.153846153846154	4.98806366047745	2.56597609461985	0.0591647588385283	0.323335757970463	0.28553635875746	PRDX2/KLF4	2
GO:0003183	mitral valve morphogenesis	2/580	13/18805	0.153846153846154	4.98806366047745	2.56597609461985	0.0591647588385283	0.323335757970463	0.28553635875746	EFNA1/ZFPM1	2
GO:0033690	positive regulation of osteoblast proliferation	2/580	13/18805	0.153846153846154	4.98806366047745	2.56597609461985	0.0591647588385283	0.323335757970463	0.28553635875746	IGF1R/LTF	2
GO:0034145	positive regulation of toll-like receptor 4 signaling pathway	2/580	13/18805	0.153846153846154	4.98806366047745	2.56597609461985	0.0591647588385283	0.323335757970463	0.28553635875746	LTF/PELI1	2
GO:0042074	cell migration involved in gastrulation	2/580	13/18805	0.153846153846154	4.98806366047745	2.56597609461985	0.0591647588385283	0.323335757970463	0.28553635875746	EPB41L5/GPC3	2
GO:0042362	fat-soluble vitamin biosynthetic process	2/580	13/18805	0.153846153846154	4.98806366047745	2.56597609461985	0.0591647588385283	0.323335757970463	0.28553635875746	SNAI1/TNF	2
GO:0042492	gamma-delta T cell differentiation	2/580	13/18805	0.153846153846154	4.98806366047745	2.56597609461985	0.0591647588385283	0.323335757970463	0.28553635875746	LEF1/EGR3	2
GO:0043568	positive regulation of insulin-like growth factor receptor signaling pathway	2/580	13/18805	0.153846153846154	4.98806366047745	2.56597609461985	0.0591647588385283	0.323335757970463	0.28553635875746	IGFBP4/IGFBP5	2
GO:0045838	positive regulation of membrane potential	2/580	13/18805	0.153846153846154	4.98806366047745	2.56597609461985	0.0591647588385283	0.323335757970463	0.28553635875746	NDUFC2/NNT	2
GO:0061052	negative regulation of cell growth involved in cardiac muscle cell development	2/580	13/18805	0.153846153846154	4.98806366047745	2.56597609461985	0.0591647588385283	0.323335757970463	0.28553635875746	RGS2/FOXP1	2
GO:0061684	chaperone-mediated autophagy	2/580	13/18805	0.153846153846154	4.98806366047745	2.56597609461985	0.0591647588385283	0.323335757970463	0.28553635875746	ATP13A2/CLU	2
GO:0070486	leukocyte aggregation	2/580	13/18805	0.153846153846154	4.98806366047745	2.56597609461985	0.0591647588385283	0.323335757970463	0.28553635875746	S100A8/S100A9	2
GO:0070561	vitamin D receptor signaling pathway	2/580	13/18805	0.153846153846154	4.98806366047745	2.56597609461985	0.0591647588385283	0.323335757970463	0.28553635875746	MED1/PIM1	2
GO:0070828	heterochromatin organization	2/580	13/18805	0.153846153846154	4.98806366047745	2.56597609461985	0.0591647588385283	0.323335757970463	0.28553635875746	MECOM/SNAI1	2
GO:1900103	positive regulation of endoplasmic reticulum unfolded protein response	2/580	13/18805	0.153846153846154	4.98806366047745	2.56597609461985	0.0591647588385283	0.323335757970463	0.28553635875746	AGR2/PIK3R1	2
GO:0001659	temperature homeostasis	10/580	184/18805	0.0543478260869565	1.76208770614693	1.85318047871351	0.059446091129333	0.324104309861346	0.286215063487851	CEBPB/IGF1R/ARRDC3/ABAT/CXCR4/PTGER3/LCN2/TNF/FTO/DHRS7B	10
GO:0006109	regulation of carbohydrate metabolic process	10/580	184/18805	0.0543478260869565	1.76208770614693	1.85318047871351	0.059446091129333	0.324104309861346	0.286215063487851	IGFBP4/TFF3/PMAIP1/IER3/EIF6/PPP2CA/IRS1/KAT2A/FOXK2/INSR	10
GO:2001057	reactive nitrogen species metabolic process	6/580	90/18805	0.0666666666666667	2.16149425287356	1.97037438845512	0.0595930743848302	0.324145188093794	0.28625116287172	KLF4/ESR1/CLU/KLF2/TNF/INSR	6
GO:0050821	protein stabilization	12/580	234/18805	0.0512820512820513	1.66268788682582	1.81972040727767	0.0595943074268382	0.324145188093794	0.28625116287172	BAG3/EFNA1/HSPA1A/CLU/NAA30/PIM1/PFN2/HOXB-AS3/TAF9/TSPAN1/HSPA1B/PIK3R1	12
GO:0002821	positive regulation of adaptive immune response	8/580	136/18805	0.0588235294117647	1.90720081135903	1.89416455642007	0.059893327522689	0.324992798033901	0.286999683411063	IL6ST/BRD2/PYCARD/SKAP1/HMCES/EXOSC6/NFKBIZ/TNF	8
GO:0006953	acute-phase response	4/580	48/18805	0.0833333333333333	2.70186781609195	2.10605691937893	0.0600323141147927	0.324992798033901	0.286999683411063	CEBPB/SERPINA1/PTGER3/TNF	4
GO:0070266	necroptotic process	4/580	48/18805	0.0833333333333333	2.70186781609195	2.10605691937893	0.0600323141147927	0.324992798033901	0.286999683411063	CYLD/RIPK1/PELI1/TNF	4
GO:0140632	canonical inflammasome complex assembly	4/580	48/18805	0.0833333333333333	2.70186781609195	2.10605691937893	0.0600323141147927	0.324992798033901	0.286999683411063	PYCARD/NEK7/ZDHHC5/PPP2CA	4
GO:1903829	positive regulation of protein localization	22/580	499/18805	0.0440881763527054	1.42944509709073	1.73446900012591	0.0601183542318145	0.325076593833298	0.287073683105959	OAZ1/JUP/BAG3/AGR2/ATP13A2/MPC2/ABAT/TMEM30B/CYLD/ZDHHC5/LEPROT/CDK9/VAMP2/NUP62/IER3IP1/LARP7/YAP1/TNF/RHOU/EIF2AK3/MYO18A/PIK3R1	22
GO:0005996	monosaccharide metabolic process	13/580	260/18805	0.05	1.62112068965517	1.7990970880303	0.0603854040371164	0.32613781523915	0.288010842973351	IGFBP4/TFF3/PMAIP1/TFAP2B/GCLC/IRS1/KAT2A/FOXK2/POFUT2/TNF/SORD/ENO2/INSR	13
GO:0048645	animal organ formation	5/580	69/18805	0.072463768115942	2.34945027486257	2.00331084528069	0.0616183076680468	0.332406959516032	0.293547096187601	FRS2/MESP1/PIM1/ROBO2/EXT1	5
GO:0032984	protein-containing complex disassembly	13/580	261/18805	0.0498084291187739	1.61490949927335	1.78457619740364	0.0618558344312199	0.33329804587676	0.294334010559144	MYC/SPTAN1/NAPA/ADD3/IGF1R/MAP1LC3B2/PEX2/MID1IP1/NSF/SMARCC2/MAP1B/TNF/INSR	13
GO:0072006	nephron development	9/580	161/18805	0.0559006211180124	1.8124330691797	1.84687002632027	0.0620245715372949	0.333816823682614	0.294792140914467	MYC/TFAP2B/BASP1/GPC3/HOXB7/YAP1/EXT1/PPP3CA/NPNT	9
GO:1902115	regulation of organelle assembly	12/580	236/18805	0.0508474576271186	1.64859731151373	1.78871948159121	0.0627036963659493	0.337078097033756	0.297672156794687	G3BP2/PLK2/HSPA1A/CYLD/NUP62/PIP4K2B/SNX30/KAT2A/YAP1/TNF/HTT/HSPA1B	12
GO:1903557	positive regulation of tumor necrosis factor superfamily cytokine production	7/580	114/18805	0.0614035087719298	1.99084996975197	1.89299473878202	0.0629212644766215	0.337853456228199	0.298356873024343	DDT/PYCARD/CLU/RIPK1/NFATC4/CYBA/PIK3R1	7
GO:0071824	protein-DNA complex organization	13/580	262/18805	0.049618320610687	1.60874572255857	1.77011677841107	0.0633500024314871	0.338730426866528	0.299131321864698	MYC/ESR1/MED1/BRD2/SMYD3/TSPYL2/MED14/BRF1/SMARCC2/TAF9/NFKBIZ/TSPYL5/TAF1B	13
GO:0006509	membrane protein ectodomain proteolysis	4/580	49/18805	0.0816326530612245	2.64672765657987	2.05899388593908	0.0638462521420255	0.338730426866528	0.299131321864698	TSPAN15/PSENEN/TIMP3/TNF	4
GO:0010453	regulation of cell fate commitment	4/580	49/18805	0.0816326530612245	2.64672765657987	2.05899388593908	0.0638462521420255	0.338730426866528	0.299131321864698	BRD2/CHD4/MESP1/LGALS1	4
GO:0030330	DNA damage response, signal transduction by p53 class mediator	4/580	49/18805	0.0816326530612245	2.64672765657987	2.05899388593908	0.0638462521420255	0.338730426866528	0.299131321864698	PMAIP1/SNAI1/EEF1E1/MUC1	4
GO:0043029	T cell homeostasis	4/580	49/18805	0.0816326530612245	2.64672765657987	2.05899388593908	0.0638462521420255	0.338730426866528	0.299131321864698	PRDX2/PMAIP1/TSC22D3/PPP2CA	4
GO:0070849	response to epidermal growth factor	4/580	49/18805	0.0816326530612245	2.64672765657987	2.05899388593908	0.0638462521420255	0.338730426866528	0.299131321864698	ZFP36/MED1/GAREM1/BLOC1S6	4
GO:0002066	columnar/cuboidal epithelial cell development	3/580	30/18805	0.1	3.24224137931034	2.19259473559271	0.0640483971134269	0.338730426866528	0.299131321864698	PGR/IL6ST/YAP1	3
GO:0010893	positive regulation of steroid biosynthetic process	3/580	30/18805	0.1	3.24224137931034	2.19259473559271	0.0640483971134269	0.338730426866528	0.299131321864698	IGF1R/ADM/TNF	3
GO:0045672	positive regulation of osteoclast differentiation	3/580	30/18805	0.1	3.24224137931034	2.19259473559271	0.0640483971134269	0.338730426866528	0.299131321864698	KLF10/TNF/PPP3CA	3
GO:0046639	negative regulation of alpha-beta T cell differentiation	3/580	30/18805	0.1	3.24224137931034	2.19259473559271	0.0640483971134269	0.338730426866528	0.299131321864698	BCL6/SOCS1/LGALS1	3
GO:0060441	epithelial tube branching involved in lung morphogenesis	3/580	30/18805	0.1	3.24224137931034	2.19259473559271	0.0640483971134269	0.338730426866528	0.299131321864698	YAP1/TNF/EXT1	3
GO:0071549	cellular response to dexamethasone stimulus	3/580	30/18805	0.1	3.24224137931034	2.19259473559271	0.0640483971134269	0.338730426866528	0.299131321864698	IGF1R/SMYD3/USP8	3
GO:2000629	negative regulation of miRNA metabolic process	3/580	30/18805	0.1	3.24224137931034	2.19259473559271	0.0640483971134269	0.338730426866528	0.299131321864698	ESR1/NFATC4/TNF	3
GO:1903052	positive regulation of proteolysis involved in protein catabolic process	8/580	138/18805	0.0579710144927536	1.87956021989006	1.85000630356078	0.0641139423111813	0.338730426866528	0.299131321864698	SUMO2/TRAF7/HSPA1A/CLU/ZFAND2A/GCLC/PSMC1/HSPA1B	8
GO:0019318	hexose metabolic process	12/580	237/18805	0.0506329113924051	1.6416412047141	1.77332854290694	0.0642978550314866	0.339312964639242	0.299646	IGFBP4/TFF3/PMAIP1/TFAP2B/IRS1/KAT2A/FOXK2/POFUT2/TNF/SORD/ENO2/INSR	12
GO:0072524	pyridine-containing compound metabolic process	10/580	187/18805	0.053475935828877	1.7338189194173	1.79907199999214	0.0648117041058733	0.341405806003211	0.301493937189954	OGDH/IER3/EIF6/NNT/PPP2CA/FOXK2/FMO5/KYNU/ENO2/INSR	10
GO:0055017	cardiac muscle tissue growth	6/580	92/18805	0.0652173913043478	2.11450524737631	1.91165568204621	0.0649167540826596	0.341405806003211	0.301493937189954	SORBS2/RGS2/FOXP1/PIM1/YAP1/TGFBR3	6
GO:2000628	regulation of miRNA metabolic process	6/580	92/18805	0.0652173913043478	2.11450524737631	1.91165568204621	0.0649167540826596	0.341405806003211	0.301493937189954	KLF4/MYC/ESR1/MYB/NFATC4/TNF	6
GO:1901800	positive regulation of proteasomal protein catabolic process	7/580	115/18805	0.0608695652173913	1.97353823088456	1.86811079472885	0.0653124765239322	0.34270453228446	0.302640836548373	SUMO2/HSPA1A/CLU/ZFAND2A/GCLC/PSMC1/HSPA1B	7
GO:1903900	regulation of viral life cycle	7/580	115/18805	0.0608695652173913	1.97353823088456	1.86811079472885	0.0653124765239322	0.34270453228446	0.302640836548373	CSNK2B/MX1/LTF/TMPRSS2/LGALS1/CXCL8/TNF	7
GO:0007033	vacuole organization	12/580	238/18805	0.0504201680672269	1.63474355259345	1.75800966186935	0.0659184662045728	0.345490755181418	0.305101337501555	AMBRA1/ATP13A2/MAP1LC3B2/CTSD/LRBA/AKTIP/PACS2/CLVS1/PIP4K2B/SNX30/EXT1/HOOK3	12
GO:0043491	phosphatidylinositol 3-kinase/protein kinase B signal transduction	15/580	316/18805	0.0474683544303797	1.53903862941947	1.72389999742077	0.0661463699958136	0.346065382507453	0.305608788317847	AMBRA1/PDCD6/TPBG/IGFBP5/IGF1R/GDF15/PPP2CA/IRS1/SEMA3E/PIK3C2G/TNF/TSPYL5/INSR/PIK3R1/ERBB3	15
GO:0042060	wound healing	20/580	450/18805	0.0444444444444444	1.44099616858238	1.68915393132665	0.0661783377445336	0.346065382507453	0.305608788317847	IL6ST/PRDX2/PRCP/SERPINA1/TFPI2/ITGB6/VKORC1/CXCR4/CD59/PLAT/MSX2/BLOC1S6/GNA12/RAF1/YAP1/TNF/EXT1/PPP3CA/SLC12A2/ERBB3	20
GO:0003174	mitral valve development	2/580	14/18805	0.142857142857143	4.63177339901478	2.42500793723446	0.0676519240162429	0.346210226715195	0.30573669958855	EFNA1/ZFPM1	2
GO:0006122	mitochondrial electron transport, ubiquinol to cytochrome c	2/580	14/18805	0.142857142857143	4.63177339901478	2.42500793723446	0.0676519240162429	0.346210226715195	0.30573669958855	UQCR11/UQCRHL	2
GO:0009214	cyclic nucleotide catabolic process	2/580	14/18805	0.142857142857143	4.63177339901478	2.42500793723446	0.0676519240162429	0.346210226715195	0.30573669958855	PDE7A/CNP	2
GO:0010820	positive regulation of T cell chemotaxis	2/580	14/18805	0.142857142857143	4.63177339901478	2.42500793723446	0.0676519240162429	0.346210226715195	0.30573669958855	S100A7/STK39	2
GO:0035970	peptidyl-threonine dephosphorylation	2/580	14/18805	0.142857142857143	4.63177339901478	2.42500793723446	0.0676519240162429	0.346210226715195	0.30573669958855	DUSP5/PPP2CA	2
GO:0042541	hemoglobin biosynthetic process	2/580	14/18805	0.142857142857143	4.63177339901478	2.42500793723446	0.0676519240162429	0.346210226715195	0.30573669958855	KLF4/LDB1	2
GO:0043144	sno(s)RNA processing	2/580	14/18805	0.142857142857143	4.63177339901478	2.42500793723446	0.0676519240162429	0.346210226715195	0.30573669958855	EXOSC6/LARP7	2
GO:0043650	dicarboxylic acid biosynthetic process	2/580	14/18805	0.142857142857143	4.63177339901478	2.42500793723446	0.0676519240162429	0.346210226715195	0.30573669958855	GLS/KYNU	2
GO:0045837	negative regulation of membrane potential	2/580	14/18805	0.142857142857143	4.63177339901478	2.42500793723446	0.0676519240162429	0.346210226715195	0.30573669958855	PMAIP1/LTF	2
GO:0051645	Golgi localization	2/580	14/18805	0.142857142857143	4.63177339901478	2.42500793723446	0.0676519240162429	0.346210226715195	0.30573669958855	DAB1/HOOK3	2
GO:0070103	regulation of interleukin-6-mediated signaling pathway	2/580	14/18805	0.142857142857143	4.63177339901478	2.42500793723446	0.0676519240162429	0.346210226715195	0.30573669958855	IL6ST/RIPK1	2
GO:0072075	metanephric mesenchyme development	2/580	14/18805	0.142857142857143	4.63177339901478	2.42500793723446	0.0676519240162429	0.346210226715195	0.30573669958855	MYC/BASP1	2
GO:1902259	regulation of delayed rectifier potassium channel activity	2/580	14/18805	0.142857142857143	4.63177339901478	2.42500793723446	0.0676519240162429	0.346210226715195	0.30573669958855	KCNE4/VAMP2	2
GO:1904350	regulation of protein catabolic process in the vacuole	2/580	14/18805	0.142857142857143	4.63177339901478	2.42500793723446	0.0676519240162429	0.346210226715195	0.30573669958855	ATP13A2/USP8	2
GO:1905809	negative regulation of synapse organization	2/580	14/18805	0.142857142857143	4.63177339901478	2.42500793723446	0.0676519240162429	0.346210226715195	0.30573669958855	ROBO2/NFATC4	2
GO:0001656	metanephros development	6/580	93/18805	0.0645161290322581	2.09176863181313	1.88285697542273	0.0676798267564708	0.346210226715195	0.30573669958855	MYC/TFAP2B/BASP1/GPC3/ROBO2/YAP1	6
GO:0010907	positive regulation of glucose metabolic process	4/580	50/18805	0.08	2.59379310344828	2.01309263850336	0.067784159864794	0.346210226715195	0.30573669958855	PMAIP1/IRS1/KAT2A/INSR	4
GO:0031670	cellular response to nutrient	4/580	50/18805	0.08	2.59379310344828	2.01309263850336	0.067784159864794	0.346210226715195	0.30573669958855	MED1/PIM1/GDAP1/CDKN2B	4
GO:0045747	positive regulation of Notch signaling pathway	4/580	50/18805	0.08	2.59379310344828	2.01309263850336	0.067784159864794	0.346210226715195	0.30573669958855	IL6ST/MESP1/ROBO2/YAP1	4
GO:1903573	negative regulation of response to endoplasmic reticulum stress	4/580	50/18805	0.08	2.59379310344828	2.01309263850336	0.067784159864794	0.346210226715195	0.30573669958855	PPP1R15A/PPP1R15B/HSPA1A/CLU	4
GO:2000404	regulation of T cell migration	4/580	50/18805	0.08	2.59379310344828	2.01309263850336	0.067784159864794	0.346210226715195	0.30573669958855	S100A7/PYCARD/STK39/ECM1	4
GO:0042987	amyloid precursor protein catabolic process	5/580	71/18805	0.0704225352112676	2.28326857697912	1.93257708591323	0.0679855642299855	0.346854368114666	0.30630553797155	FKBP1A/EFNA1/CLU/PSENEN/TNF	5
GO:0000082	G1/S transition of mitotic cell cycle	12/580	240/18805	0.05	1.62112068965517	1.72758525845896	0.0692394367203468	0.350328072594686	0.309373150829621	AMBRA1/KLF4/MYC/RBL2/TMEM14B/PLK2/PPP2CA/SMARCC2/CCNO/RHOU/CDKN2B/PPP3CA	12
GO:0003298	physiological muscle hypertrophy	3/580	31/18805	0.0967741935483871	3.13765294771969	2.12493176007643	0.0693508144576412	0.350328072594686	0.309373150829621	SORBS2/RGS2/FOXP1	3
GO:0003301	physiological cardiac muscle hypertrophy	3/580	31/18805	0.0967741935483871	3.13765294771969	2.12493176007643	0.0693508144576412	0.350328072594686	0.309373150829621	SORBS2/RGS2/FOXP1	3
GO:0042744	hydrogen peroxide catabolic process	3/580	31/18805	0.0967741935483871	3.13765294771969	2.12493176007643	0.0693508144576412	0.350328072594686	0.309373150829621	PRDX2/NNT/PXDNL	3
GO:0050654	chondroitin sulfate proteoglycan metabolic process	3/580	31/18805	0.0967741935483871	3.13765294771969	2.12493176007643	0.0693508144576412	0.350328072594686	0.309373150829621	UGDH/SLC35B2/EXT1	3
GO:0050820	positive regulation of coagulation	3/580	31/18805	0.0967741935483871	3.13765294771969	2.12493176007643	0.0693508144576412	0.350328072594686	0.309373150829621	PRDX2/VKORC1/PLAT	3
GO:0061049	cell growth involved in cardiac muscle cell development	3/580	31/18805	0.0967741935483871	3.13765294771969	2.12493176007643	0.0693508144576412	0.350328072594686	0.309373150829621	SORBS2/RGS2/FOXP1	3
GO:0071295	cellular response to vitamin	3/580	31/18805	0.0967741935483871	3.13765294771969	2.12493176007643	0.0693508144576412	0.350328072594686	0.309373150829621	MED1/PIM1/GDAP1	3
GO:0098868	bone growth	3/580	31/18805	0.0967741935483871	3.13765294771969	2.12493176007643	0.0693508144576412	0.350328072594686	0.309373150829621	MSX2/ECM1/EXT1	3
GO:0044344	cellular response to fibroblast growth factor stimulus	9/580	165/18805	0.0545454545454545	1.76849529780564	1.76874645390265	0.0700579194242841	0.353359842437355	0.312050493190083	FRS2/ZFP36/IGF1R/CHURC1/GCLC/CXCL8/EGR3/EXT1/INSR	9
GO:0141091	transforming growth factor beta receptor superfamily signaling pathway	18/580	399/18805	0.0451127819548872	1.4626652838994	1.66639902166802	0.0701461911581743	0.353359842437355	0.312050493190083	FKBP1A/GDF15/ITGB6/CSNK2B/TFAP2B/HSPA1A/CDKN1C/LEF1/MSX2/GPC3/SAP30/IGSF1/TGFBR3/CDKN2B/EXT1/BMPR1B/NPNT/PMEPA1	18
GO:0009135	purine nucleoside diphosphate metabolic process	7/580	117/18805	0.0598290598290598	1.93980253463012	1.81908703963987	0.0702577850385537	0.353359842437355	0.312050493190083	OGDH/IER3/EIF6/PPP2CA/FOXK2/ENO2/INSR	7
GO:0009179	purine ribonucleoside diphosphate metabolic process	7/580	117/18805	0.0598290598290598	1.93980253463012	1.81908703963987	0.0702577850385537	0.353359842437355	0.312050493190083	OGDH/IER3/EIF6/PPP2CA/FOXK2/ENO2/INSR	7
GO:1900182	positive regulation of protein localization to nucleus	6/580	94/18805	0.0638297872340425	2.06951577402788	1.85441943930251	0.0705103177215882	0.354243221094173	0.312830600922847	JUP/BAG3/LARP7/YAP1/EIF2AK3/PIK3R1	6
GO:0008643	carbohydrate transport	8/580	141/18805	0.0567375886524823	1.83956957691367	1.78512748140465	0.0707834574207382	0.355228091870742	0.313700335891702	PEA15/ZDHHC7/IRS1/GPC3/MFSD2A/TNF/INSR/PIK3R1	8
GO:0002562	somatic diversification of immune receptors via germline recombination within a single locus	5/580	72/18805	0.0694444444444444	2.25155651340996	1.89809697016558	0.0713009485626752	0.357047250030701	0.315306826309771	BCL6/LEF1/HMCES/EXOSC6/NFKBIZ	5
GO:0016444	somatic cell DNA recombination	5/580	72/18805	0.0694444444444444	2.25155651340996	1.89809697016558	0.0713009485626752	0.357047250030701	0.315306826309771	BCL6/LEF1/HMCES/EXOSC6/NFKBIZ	5
GO:0035384	thioester biosynthetic process	4/580	51/18805	0.0784313725490196	2.54293441514537	1.96829843805735	0.0718447635331611	0.358601111156309	0.316679034105796	ACLY/ELOVL5/MPC2/SLC27A2	4
GO:0071616	acyl-CoA biosynthetic process	4/580	51/18805	0.0784313725490196	2.54293441514537	1.96829843805735	0.0718447635331611	0.358601111156309	0.316679034105796	ACLY/ELOVL5/MPC2/SLC27A2	4
GO:1990090	cellular response to nerve growth factor stimulus	4/580	51/18805	0.0784313725490196	2.54293441514537	1.96829843805735	0.0718447635331611	0.358601111156309	0.316679034105796	ARPC3/EHD1/KAT2A/USP8	4
GO:0016241	regulation of macroautophagy	10/580	191/18805	0.0523560209424084	1.69750857555515	1.72842973792952	0.0724354984037899	0.361158377863918	0.318937344874286	AMBRA1/BAG3/HSPB8/ATP13A2/EXOC4/PIP4K2B/SNX30/WDR24/HTT/SPTLC2	10
GO:0046434	organophosphate catabolic process	12/580	242/18805	0.0495867768595041	1.60772299800513	1.6974407416649	0.0726673240688511	0.361504630684923	0.319243119188701	OGDH/IER3/EIF6/TYMP/NUDT4/PPP2CA/FOXK2/PDE7A/GPCPD1/ENO2/INSR/CNP	12
GO:0022037	metencephalon development	7/580	118/18805	0.0593220338983051	1.92336353009936	1.79493727986542	0.0728119348297279	0.361504630684923	0.319243119188701	OGDH/IGF1R/ABAT/NANOS1/LDB1/DAB1/KAT2A	7
GO:0042177	negative regulation of protein catabolic process	7/580	118/18805	0.0593220338983051	1.92336353009936	1.79493727986542	0.0728119348297279	0.361504630684923	0.319243119188701	ATP13A2/SF3B3/CSNK2B/TIMP3/F8A1/TAF9/USP8	7
GO:0042593	glucose homeostasis	13/580	268/18805	0.0485074626865672	1.57272902727741	1.68462102392273	0.0728188185968329	0.361504630684923	0.319243119188701	PRCP/IGFBP5/IGF1R/MPC2/GCLC/IRS1/ENDOG/FOXK2/RAF1/NUCKS1/PPP3CA/INSR/PIK3R1	13
GO:0018105	peptidyl-serine phosphorylation	8/580	142/18805	0.0563380281690141	1.82661486158329	1.76385143535647	0.0730972436438348	0.362496234087348	0.320118799709276	GADD45A/PLK2/STK39/RIPK1/PFN2/RAF1/TNF/EIF2AK3	8
GO:0006470	protein dephosphorylation	6/580	95/18805	0.0631578947368421	2.04773139745917	1.82633405399698	0.0734081154933891	0.362639181914229	0.320245036294539	DUSP5/PPP2CA/PPP1CB/DUSP2/PPP3CA/DUSP6	6
GO:0090316	positive regulation of intracellular protein transport	6/580	95/18805	0.0631578947368421	2.04773139745917	1.82633405399698	0.0734081154933891	0.362639181914229	0.320245036294539	OAZ1/JUP/BAG3/TMEM30B/VAMP2/PIK3R1	6
GO:0042063	gliogenesis	16/580	348/18805	0.0459770114942529	1.49068569163694	1.64822998085554	0.0739545155495287	0.362639181914229	0.320245036294539	IL6ST/CERS2/S100A8/CLU/MYB/CXCR4/S100A9/LEF1/SOCS7/DAB1/RAF1/TNF/CDKN2B/AREG/CNP/ERBB3	16
GO:0045165	cell fate commitment	14/580	295/18805	0.0474576271186441	1.53869082407949	1.66361461148086	0.0741196579814648	0.362639181914229	0.320245036294539	IL6ST/KLF4/MCL1/BRD2/CHD4/SOCS3/MESP1/CYLD/ETS2/ZFPM1/LGALS1/EPOP/EXT1/LEO1	14
GO:0001667	ameboidal-type cell migration	12/580	243/18805	0.0493827160493827	1.60110685398042	1.6824717550226	0.0744215565563677	0.362639181914229	0.320245036294539	TPBG/SNAI1/EPB41L5/MESP1/YTHDF3/PFN2/NANOS1/SEMA3E/GPC3/GNA12/PDLIM1/ARID5B	12
GO:0033500	carbohydrate homeostasis	13/580	269/18805	0.0483271375464684	1.56688245096782	1.67057697685869	0.0744816997827967	0.362639181914229	0.320245036294539	PRCP/IGFBP5/IGF1R/MPC2/GCLC/IRS1/ENDOG/FOXK2/RAF1/NUCKS1/PPP3CA/INSR/PIK3R1	13
GO:0015800	acidic amino acid transport	5/580	73/18805	0.0684931506849315	2.22071327350024	1.86418226500853	0.0747036053301713	0.362639181914229	0.320245036294539	ARL6IP1/SLC38A2/ABAT/TNF/SLC12A2	5
GO:0044772	mitotic cell cycle phase transition	20/580	457/18805	0.0437636761487965	1.41892401720365	1.61735123065647	0.0747117058880573	0.362639181914229	0.320245036294539	AMBRA1/CALM2/KLF4/MYC/RBL2/IER3/TEX14/TMEM14B/PLK2/CDKN1C/MAD2L1BP/PPP2CA/HSPA2/SMARCC2/CCNO/RHOU/CDKN2B/CDK14/PPP3CA/USP22	20
GO:0002313	mature B cell differentiation involved in immune response	3/580	32/18805	0.09375	3.03960129310345	2.05995995200596	0.0748447123663278	0.362639181914229	0.320245036294539	BCL6/LGALS1/NFKBIZ	3
GO:0006026	aminoglycan catabolic process	3/580	32/18805	0.09375	3.03960129310345	2.05995995200596	0.0748447123663278	0.362639181914229	0.320245036294539	CHI3L2/IDS/PGLYRP2	3
GO:0034250	positive regulation of amide metabolic process	3/580	32/18805	0.09375	3.03960129310345	2.05995995200596	0.0748447123663278	0.362639181914229	0.320245036294539	EFNA1/CLU/TNF	3
GO:0034311	diol metabolic process	3/580	32/18805	0.09375	3.03960129310345	2.05995995200596	0.0748447123663278	0.362639181914229	0.320245036294539	SPTSSA/SPTSSB/SPTLC2	3
GO:0043516	regulation of DNA damage response, signal transduction by p53 class mediator	3/580	32/18805	0.09375	3.03960129310345	2.05995995200596	0.0748447123663278	0.362639181914229	0.320245036294539	PMAIP1/SNAI1/EEF1E1	3
GO:0048679	regulation of axon regeneration	3/580	32/18805	0.09375	3.03960129310345	2.05995995200596	0.0748447123663278	0.362639181914229	0.320245036294539	KLF4/CERS2/IGF1R	3
GO:0060045	positive regulation of cardiac muscle cell proliferation	3/580	32/18805	0.09375	3.03960129310345	2.05995995200596	0.0748447123663278	0.362639181914229	0.320245036294539	PIM1/YAP1/TGFBR3	3
GO:0000045	autophagosome assembly	7/580	119/18805	0.0588235294117647	1.90720081135903	1.7710225375858	0.075420400502696	0.362639181914229	0.320245036294539	AMBRA1/MAP1LC3B2/CTSD/LRBA/PACS2/PIP4K2B/SNX30	7
GO:0050679	positive regulation of epithelial cell proliferation	11/580	218/18805	0.0504587155963303	1.63599335653274	1.6849286927976	0.0756844155470165	0.362639181914229	0.320245036294539	PDCD6/MYC/MED1/NME1/NRAS/NRARP/YAP1/TNF/ECM1/EGR3/AREG	11
GO:0010466	negative regulation of peptidase activity	4/580	52/18805	0.0769230769230769	2.49403183023873	1.9245601752777	0.0760266450958304	0.362639181914229	0.320245036294539	CSTB/TIMP3/CSTA/ECM1	4
GO:0045776	negative regulation of blood pressure	4/580	52/18805	0.0769230769230769	2.49403183023873	1.9245601752777	0.0760266450958304	0.362639181914229	0.320245036294539	PRCP/IER3/ABAT/TNF	4
GO:0001711	endodermal cell fate commitment	2/580	15/18805	0.133333333333333	4.32298850574713	2.29676429490036	0.0765108063426592	0.362639181914229	0.320245036294539	MESP1/LEO1	2
GO:0003198	epithelial to mesenchymal transition involved in endocardial cushion formation	2/580	15/18805	0.133333333333333	4.32298850574713	2.29676429490036	0.0765108063426592	0.362639181914229	0.320245036294539	SNAI1/MSX2	2
GO:0010454	negative regulation of cell fate commitment	2/580	15/18805	0.133333333333333	4.32298850574713	2.29676429490036	0.0765108063426592	0.362639181914229	0.320245036294539	MESP1/LGALS1	2
GO:0010819	regulation of T cell chemotaxis	2/580	15/18805	0.133333333333333	4.32298850574713	2.29676429490036	0.0765108063426592	0.362639181914229	0.320245036294539	S100A7/STK39	2
GO:0016322	neuron remodeling	2/580	15/18805	0.133333333333333	4.32298850574713	2.29676429490036	0.0765108063426592	0.362639181914229	0.320245036294539	RND1/FARP2	2
GO:0017014	protein nitrosylation	2/580	15/18805	0.133333333333333	4.32298850574713	2.29676429490036	0.0765108063426592	0.362639181914229	0.320245036294539	S100A8/S100A9	2
GO:0018119	peptidyl-cysteine S-nitrosylation	2/580	15/18805	0.133333333333333	4.32298850574713	2.29676429490036	0.0765108063426592	0.362639181914229	0.320245036294539	S100A8/S100A9	2
GO:0021859	pyramidal neuron differentiation	2/580	15/18805	0.133333333333333	4.32298850574713	2.29676429490036	0.0765108063426592	0.362639181914229	0.320245036294539	OGDH/BCL6	2
GO:0032352	positive regulation of hormone metabolic process	2/580	15/18805	0.133333333333333	4.32298850574713	2.29676429490036	0.0765108063426592	0.362639181914229	0.320245036294539	IGF1R/ADM	2
GO:0044070	regulation of monoatomic anion transport	2/580	15/18805	0.133333333333333	4.32298850574713	2.29676429490036	0.0765108063426592	0.362639181914229	0.320245036294539	RIPK1/CA2	2
GO:0045176	apical protein localization	2/580	15/18805	0.133333333333333	4.32298850574713	2.29676429490036	0.0765108063426592	0.362639181914229	0.320245036294539	NAPA/SHROOM3	2
GO:0046598	positive regulation of viral entry into host cell	2/580	15/18805	0.133333333333333	4.32298850574713	2.29676429490036	0.0765108063426592	0.362639181914229	0.320245036294539	TMPRSS2/LGALS1	2
GO:0048820	hair follicle maturation	2/580	15/18805	0.133333333333333	4.32298850574713	2.29676429490036	0.0765108063426592	0.362639181914229	0.320245036294539	TRPC4AP/MSX2	2
GO:0050966	detection of mechanical stimulus involved in sensory perception of pain	2/580	15/18805	0.133333333333333	4.32298850574713	2.29676429490036	0.0765108063426592	0.362639181914229	0.320245036294539	CXCR4/TNF	2
GO:0060457	negative regulation of digestive system process	2/580	15/18805	0.133333333333333	4.32298850574713	2.29676429490036	0.0765108063426592	0.362639181914229	0.320245036294539	STK39/PTGER3	2
GO:0070424	regulation of nucleotide-binding domain, leucine rich repeat containing receptor signaling pathway	2/580	15/18805	0.133333333333333	4.32298850574713	2.29676429490036	0.0765108063426592	0.362639181914229	0.320245036294539	HSPA1A/HSPA1B	2
GO:0072537	fibroblast activation	2/580	15/18805	0.133333333333333	4.32298850574713	2.29676429490036	0.0765108063426592	0.362639181914229	0.320245036294539	MYB/GCLC	2
GO:0075294	positive regulation by symbiont of entry into host	2/580	15/18805	0.133333333333333	4.32298850574713	2.29676429490036	0.0765108063426592	0.362639181914229	0.320245036294539	TMPRSS2/LGALS1	2
GO:0106072	negative regulation of adenylate cyclase-activating G protein-coupled receptor signaling pathway	2/580	15/18805	0.133333333333333	4.32298850574713	2.29676429490036	0.0765108063426592	0.362639181914229	0.320245036294539	CRTC3/ARRDC3	2
GO:1901533	negative regulation of hematopoietic progenitor cell differentiation	2/580	15/18805	0.133333333333333	4.32298850574713	2.29676429490036	0.0765108063426592	0.362639181914229	0.320245036294539	ZFP36/MYB	2
GO:1901741	positive regulation of myoblast fusion	2/580	15/18805	0.133333333333333	4.32298850574713	2.29676429490036	0.0765108063426592	0.362639181914229	0.320245036294539	GDF15/EHD1	2
GO:1902166	negative regulation of intrinsic apoptotic signaling pathway in response to DNA damage by p53 class mediator	2/580	15/18805	0.133333333333333	4.32298850574713	2.29676429490036	0.0765108063426592	0.362639181914229	0.320245036294539	TAF9/MUC1	2
GO:1903894	regulation of IRE1-mediated unfolded protein response	2/580	15/18805	0.133333333333333	4.32298850574713	2.29676429490036	0.0765108063426592	0.362639181914229	0.320245036294539	AGR2/COPS5	2
GO:2000328	regulation of T-helper 17 cell lineage commitment	2/580	15/18805	0.133333333333333	4.32298850574713	2.29676429490036	0.0765108063426592	0.362639181914229	0.320245036294539	BRD2/LGALS1	2
GO:0002819	regulation of adaptive immune response	11/580	219/18805	0.0502283105022831	1.62852306723351	1.66899740636026	0.0775967386237912	0.367408196135463	0.324456531379838	IL6ST/BRD2/PYCARD/BCL6/JUNB/SKAP1/HMCES/EXOSC6/LGALS1/NFKBIZ/TNF	11
GO:0007264	small GTPase-mediated signal transduction	21/580	487/18805	0.0431211498973306	1.39809176520569	1.58786653850928	0.0778414571970727	0.367903095988144	0.324893575221728	RERG/G3BP2/BCL6/RALGAPA2/PREX1/RND3/PLK2/RND1/NRAS/NUP62/LPAR2/RHOH/DAB1/GNA12/RAF1/RHOU/FARP2/BCAR3/TNS3/USP8/FXR1	21
GO:0007586	digestion	8/580	144/18805	0.0555555555555556	1.80124521072797	1.72180746258604	0.0778609764680792	0.367903095988144	0.324893575221728	TFF3/TFF1/TYMP/STK39/PTGER3/GCNT3/SLC46A1/PPP3CA	8
GO:0006635	fatty acid beta-oxidation	5/580	74/18805	0.0675675675675676	2.19070363466915	1.83081476743725	0.0781930141707373	0.367962427256984	0.324945970399333	PEX2/IRS1/SLC27A2/MFSD2A/ETFB	5
GO:0014743	regulation of muscle hypertrophy	5/580	74/18805	0.0675675675675676	2.19070363466915	1.83081476743725	0.0781930141707373	0.367962427256984	0.324945970399333	IL6ST/IGFBP5/RGS2/FOXP1/PPP3CA	5
GO:0071260	cellular response to mechanical stimulus	5/580	74/18805	0.0675675675675676	2.19070363466915	1.83081476743725	0.0781930141707373	0.367962427256984	0.324945970399333	BAG3/SLC38A2/GADD45A/IGF1R/GCLC	5
GO:2000036	regulation of stem cell population maintenance	5/580	74/18805	0.0675675675675676	2.19070363466915	1.83081476743725	0.0781930141707373	0.367962427256984	0.324945970399333	MYC/KAT2A/SAP30/YAP1/BICRAL	5
GO:0006694	steroid biosynthetic process	9/580	169/18805	0.0532544378698225	1.7266374209345	1.69273943035974	0.0787112317533127	0.370023106823992	0.326765747289531	STARD3/ACLY/MED1/SNAI1/IGF1R/HINT2/ADM/TNF/SRD5A3	9
GO:0046330	positive regulation of JNK cascade	6/580	97/18805	0.0618556701030928	2.00551013153217	1.77118525048859	0.079404954104172	0.371766893859675	0.328305677805547	TRAF4/GADD45A/PYCARD/RIPK1/TNF/TNIK	6
GO:0046889	positive regulation of lipid biosynthetic process	6/580	97/18805	0.0618556701030928	2.00551013153217	1.77118525048859	0.079404954104172	0.371766893859675	0.328305677805547	ELOVL5/IGF1R/ADM/MID1IP1/MFSD2A/TNF	6
GO:1904892	regulation of receptor signaling pathway via STAT	6/580	97/18805	0.0618556701030928	2.00551013153217	1.77118525048859	0.079404954104172	0.371766893859675	0.328305677805547	GADD45A/ELP2/SOCS3/SOCS1/LEPROT/DAB1	6
GO:2001257	regulation of cation channel activity	6/580	97/18805	0.0618556701030928	2.00551013153217	1.77118525048859	0.079404954104172	0.371766893859675	0.328305677805547	CALM2/FKBP1A/KCNE4/VAMP2/LRRC26/HTT	6
GO:0044403	biological process involved in symbiotic interaction	11/580	220/18805	0.05	1.62112068965517	1.65314673293241	0.0795392145284979	0.372017422672883	0.328526918677686	EXOC2/ITGB6/HSPA1A/CXCR4/LTF/TMPRSS2/LGALS1/PGLYRP2/CXCL8/HSPA1B/INSR	11
GO:0002237	response to molecule of bacterial origin	17/580	379/18805	0.0448548812664908	1.45430352106269	1.59387964322826	0.0799065946445689	0.373216845000984	0.329586123160135	CEBPB/PRDX2/ZFP36/S100A7/LDOC1/PYCARD/ADM/S100A8/LTF/PRPF8/FOXP1/PELI1/CXCL8/NFKBIZ/TNF/MAP2K3/CNP	17
GO:0014075	response to amine	4/580	53/18805	0.0754716981132075	2.4469746258946	1.88183006431514	0.0803282492805882	0.373216845000984	0.329586123160135	FOSB/RGS2/KCNC2/PPP3CA	4
GO:0141084	inflammasome-mediated signaling pathway	4/580	53/18805	0.0754716981132075	2.4469746258946	1.88183006431514	0.0803282492805882	0.373216845000984	0.329586123160135	PYCARD/NEK7/ZDHHC5/PPP2CA	4
GO:1901570	fatty acid derivative biosynthetic process	4/580	53/18805	0.0754716981132075	2.4469746258946	1.88183006431514	0.0803282492805882	0.373216845000984	0.329586123160135	ELOVL5/PAM/SLC27A2/FAR1	4
GO:0031116	positive regulation of microtubule polymerization	3/580	33/18805	0.0909090909090909	2.9474921630094	1.99748149853677	0.0805247544890337	0.373216845000984	0.329586123160135	HSPA1A/MAP1B/HSPA1B	3
GO:0045648	positive regulation of erythrocyte differentiation	3/580	33/18805	0.0909090909090909	2.9474921630094	1.99748149853677	0.0805247544890337	0.373216845000984	0.329586123160135	MED1/HSPA1A/HSPA1B	3
GO:0071875	adrenergic receptor signaling pathway	3/580	33/18805	0.0909090909090909	2.9474921630094	1.99748149853677	0.0805247544890337	0.373216845000984	0.329586123160135	CRTC3/ARRDC3/RGS2	3
GO:0097345	mitochondrial outer membrane permeabilization	3/580	33/18805	0.0909090909090909	2.9474921630094	1.99748149853677	0.0805247544890337	0.373216845000984	0.329586123160135	IER3/HSPA1A/GCLC	3
GO:0099170	postsynaptic modulation of chemical synaptic transmission	3/580	33/18805	0.0909090909090909	2.9474921630094	1.99748149853677	0.0805247544890337	0.373216845000984	0.329586123160135	NEFH/USP8/PPP3CA	3
GO:0008645	hexose transmembrane transport	7/580	121/18805	0.0578512396694215	1.87567683100598	1.72387973564748	0.0808000572690002	0.374116446068627	0.330380556831194	PEA15/ZDHHC7/IRS1/GPC3/TNF/INSR/PIK3R1	7
GO:0006406	mRNA export from nucleus	5/580	75/18805	0.0666666666666667	2.16149425287356	1.79797710728788	0.0817685797429282	0.377462772420511	0.333335682635184	NXF1/ALYREF/RBM15B/GLE1/CASC3	5
GO:0071496	cellular response to external stimulus	5/580	75/18805	0.0666666666666667	2.16149425287356	1.79797710728788	0.0817685797429282	0.377462772420511	0.333335682635184	BAG3/SLC38A2/GADD45A/IGF1R/GCLC	5
GO:0090559	regulation of membrane permeability	5/580	75/18805	0.0666666666666667	2.16149425287356	1.79797710728788	0.0817685797429282	0.377462772420511	0.333335682635184	PMAIP1/IER3/HSPA1A/GCLC/CNP	5
GO:0006022	aminoglycan metabolic process	6/580	98/18805	0.0612244897959184	1.9850457424349	1.74410534289121	0.0825035423731518	0.379714105607503	0.33532382488273	UGDH/SLC35B2/CHI3L2/IDS/PGLYRP2/EXT1	6
GO:0043502	regulation of muscle adaptation	6/580	98/18805	0.0612244897959184	1.9850457424349	1.74410534289121	0.0825035423731518	0.379714105607503	0.33532382488273	IL6ST/IGFBP5/RGS2/FOXP1/PPP3CA/TNNT1	6
GO:0051153	regulation of striated muscle cell differentiation	6/580	98/18805	0.0612244897959184	1.9850457424349	1.74410534289121	0.0825035423731518	0.379714105607503	0.33532382488273	FRS2/MESP1/RGS2/FOXP1/RBM24/KAT2A	6
GO:0048638	regulation of developmental growth	15/580	327/18805	0.0458715596330275	1.48726668775704	1.58569065264759	0.0828609802344578	0.380779401670293	0.336264583061401	AGR2/GDF15/CXCR4/BASP1/RGS2/FOXP1/PIM1/YAP1/ITSN2/MAP1B/MFSD2A/TGFBR3/FTO/DUSP6/INSR	15
GO:0048639	positive regulation of developmental growth	9/580	171/18805	0.0526315789473684	1.70644283121597	1.65549312506379	0.0832713906417538	0.380779401670293	0.336264583061401	AGR2/CXCR4/BASP1/PIM1/YAP1/ITSN2/MAP1B/TGFBR3/INSR	9
GO:0031103	axon regeneration	4/580	54/18805	0.0740740740740741	2.40166028097063	1.84006336768958	0.0847478906586751	0.380779401670293	0.336264583061401	KLF4/CERS2/IGF1R/MAP1B	4
GO:0046622	positive regulation of organ growth	4/580	54/18805	0.0740740740740741	2.40166028097063	1.84006336768958	0.0847478906586751	0.380779401670293	0.336264583061401	BASP1/PIM1/YAP1/TGFBR3	4
GO:0048146	positive regulation of fibroblast proliferation	4/580	54/18805	0.0740740740740741	2.40166028097063	1.84006336768958	0.0847478906586751	0.380779401670293	0.336264583061401	MYC/ESR1/MYB/S100A6	4
GO:0048286	lung alveolus development	4/580	54/18805	0.0740740740740741	2.40166028097063	1.84006336768958	0.0847478906586751	0.380779401670293	0.336264583061401	PGR/IGFBP5/ITGB6/BLOC1S6	4
GO:1904263	positive regulation of TORC1 signaling	4/580	54/18805	0.0740740740740741	2.40166028097063	1.84006336768958	0.0847478906586751	0.380779401670293	0.336264583061401	PIM1/SEH1L/USP32/WDR24	4
GO:0003158	endothelium development	8/580	147/18805	0.054421768707483	1.76448510438658	1.65997099795615	0.0853468822462242	0.380779401670293	0.336264583061401	GSTM3/MESP1/CSNK2B/CXCR4/FOXP1/BLOC1S6/COL18A1/TNF	8
GO:0051961	negative regulation of nervous system development	8/580	147/18805	0.054421768707483	1.76448510438658	1.65997099795615	0.0853468822462242	0.380779401670293	0.336264583061401	CERS2/ROBO2/NFATC4/DAB1/TNF/CDKN2B/PPP3CA/HOOK3	8
GO:0072678	T cell migration	5/580	76/18805	0.0657894736842105	2.13305353901996	1.76565269840442	0.0854296337665511	0.380779401670293	0.336264583061401	S100A7/PYCARD/STK39/ECM1/SLC12A2	5
GO:1903578	regulation of ATP metabolic process	5/580	76/18805	0.0657894736842105	2.13305353901996	1.76565269840442	0.0854296337665511	0.380779401670293	0.336264583061401	NDUFC2/IER3/EIF6/PPP2CA/INSR	5
GO:0001678	intracellular glucose homeostasis	9/580	172/18805	0.0523255813953488	1.69652165196472	1.6370532350818	0.0856098813766569	0.380779401670293	0.336264583061401	IGF1R/MPC2/GCLC/ENDOG/FOXK2/RAF1/NUCKS1/PPP3CA/PIK3R1	9
GO:0042542	response to hydrogen peroxide	6/580	99/18805	0.0606060606060606	1.9649947753396	1.71734458023126	0.0856685336310835	0.380779401670293	0.336264583061401	PCGF2/PPP1R15B/MYB/KLF2/RIPK1/AREG	6
GO:0002903	negative regulation of B cell apoptotic process	2/580	16/18805	0.125	4.05280172413793	2.17927534713864	0.0857104926268925	0.380779401670293	0.336264583061401	BCL6/FOXP1	2
GO:0003188	heart valve formation	2/580	16/18805	0.125	4.05280172413793	2.17927534713864	0.0857104926268925	0.380779401670293	0.336264583061401	EFNA1/ZFPM1	2
GO:0006206	pyrimidine nucleobase metabolic process	2/580	16/18805	0.125	4.05280172413793	2.17927534713864	0.0857104926268925	0.380779401670293	0.336264583061401	CTPS2/TYMP	2
GO:0008298	intracellular mRNA localization	2/580	16/18805	0.125	4.05280172413793	2.17927534713864	0.0857104926268925	0.380779401670293	0.336264583061401	ZFP36/CASC3	2
GO:0009130	pyrimidine nucleoside monophosphate biosynthetic process	2/580	16/18805	0.125	4.05280172413793	2.17927534713864	0.0857104926268925	0.380779401670293	0.336264583061401	UCK2/DCK	2
GO:0009173	pyrimidine ribonucleoside monophosphate metabolic process	2/580	16/18805	0.125	4.05280172413793	2.17927534713864	0.0857104926268925	0.380779401670293	0.336264583061401	UCK2/DCK	2
GO:0009642	response to light intensity	2/580	16/18805	0.125	4.05280172413793	2.17927534713864	0.0857104926268925	0.380779401670293	0.336264583061401	KCNC2/EXT1	2
GO:0010226	response to lithium ion	2/580	16/18805	0.125	4.05280172413793	2.17927534713864	0.0857104926268925	0.380779401670293	0.336264583061401	IMPA2/NFATC4	2
GO:0016074	sno(s)RNA metabolic process	2/580	16/18805	0.125	4.05280172413793	2.17927534713864	0.0857104926268925	0.380779401670293	0.336264583061401	EXOSC6/LARP7	2
GO:0021819	layer formation in cerebral cortex	2/580	16/18805	0.125	4.05280172413793	2.17927534713864	0.0857104926268925	0.380779401670293	0.336264583061401	SOCS7/DAB1	2
GO:0030903	notochord development	2/580	16/18805	0.125	4.05280172413793	2.17927534713864	0.0857104926268925	0.380779401670293	0.336264583061401	EFNA1/YAP1	2
GO:0031665	negative regulation of lipopolysaccharide-mediated signaling pathway	2/580	16/18805	0.125	4.05280172413793	2.17927534713864	0.0857104926268925	0.380779401670293	0.336264583061401	PRDX2/LTF	2
GO:0032354	response to follicle-stimulating hormone	2/580	16/18805	0.125	4.05280172413793	2.17927534713864	0.0857104926268925	0.380779401670293	0.336264583061401	GCLC/TGFBR3	2
GO:0034497	protein localization to phagophore assembly site	2/580	16/18805	0.125	4.05280172413793	2.17927534713864	0.0857104926268925	0.380779401670293	0.336264583061401	LRBA/PACS2	2
GO:0034616	response to laminar fluid shear stress	2/580	16/18805	0.125	4.05280172413793	2.17927534713864	0.0857104926268925	0.380779401670293	0.336264583061401	KLF4/KLF2	2
GO:0035729	cellular response to hepatocyte growth factor stimulus	2/580	16/18805	0.125	4.05280172413793	2.17927534713864	0.0857104926268925	0.380779401670293	0.336264583061401	MED1/GCLC	2
GO:0036260	RNA capping	2/580	16/18805	0.125	4.05280172413793	2.17927534713864	0.0857104926268925	0.380779401670293	0.336264583061401	SNRPD3/CMTR2	2
GO:0044065	regulation of respiratory system process	2/580	16/18805	0.125	4.05280172413793	2.17927534713864	0.0857104926268925	0.380779401670293	0.336264583061401	GLS/FTO	2
GO:0046321	positive regulation of fatty acid oxidation	2/580	16/18805	0.125	4.05280172413793	2.17927534713864	0.0857104926268925	0.380779401670293	0.336264583061401	GDF15/IRS1	2
GO:0046325	negative regulation of D-glucose import	2/580	16/18805	0.125	4.05280172413793	2.17927534713864	0.0857104926268925	0.380779401670293	0.336264583061401	PEA15/TNF	2
GO:0048148	behavioral response to cocaine	2/580	16/18805	0.125	4.05280172413793	2.17927534713864	0.0857104926268925	0.380779401670293	0.336264583061401	FOSB/ABAT	2
GO:1901298	regulation of hydrogen peroxide-mediated programmed cell death	2/580	16/18805	0.125	4.05280172413793	2.17927534713864	0.0857104926268925	0.380779401670293	0.336264583061401	FOXP1/ENDOG	2
GO:1903798	regulation of miRNA processing	2/580	16/18805	0.125	4.05280172413793	2.17927534713864	0.0857104926268925	0.380779401670293	0.336264583061401	RIPK1/HOXB-AS3	2
GO:0006790	sulfur compound metabolic process	15/580	329/18805	0.0455927051671733	1.47822555287706	1.56110494586776	0.0861677243819752	0.380839740973109	0.336317868429293	TSTD1/GSTM3/ACLY/ELOVL5/UGDH/OGDH/MRI1/SLC35B2/MPC2/SLC19A2/GCLC/SLC27A2/FAR1/IDS/EXT1	15
GO:0006099	tricarboxylic acid cycle	3/580	34/18805	0.0882352941176471	2.86080121703854	1.93731876301655	0.0863853981586496	0.380839740973109	0.336317868429293	OGDH/SDHA/NNT	3
GO:0006536	glutamate metabolic process	3/580	34/18805	0.0882352941176471	2.86080121703854	1.93731876301655	0.0863853981586496	0.380839740973109	0.336317868429293	GLS/GCLC/BLOC1S6	3
GO:0018198	peptidyl-cysteine modification	3/580	34/18805	0.0882352941176471	2.86080121703854	1.93731876301655	0.0863853981586496	0.380839740973109	0.336317868429293	S100A8/S100A9/ZDHHC7	3
GO:0031069	hair follicle morphogenesis	3/580	34/18805	0.0882352941176471	2.86080121703854	1.93731876301655	0.0863853981586496	0.380839740973109	0.336317868429293	IGFBP5/SNAI1/EXT1	3
GO:0045671	negative regulation of osteoclast differentiation	3/580	34/18805	0.0882352941176471	2.86080121703854	1.93731876301655	0.0863853981586496	0.380839740973109	0.336317868429293	MAFB/LTF/PIK3R1	3
GO:0070570	regulation of neuron projection regeneration	3/580	34/18805	0.0882352941176471	2.86080121703854	1.93731876301655	0.0863853981586496	0.380839740973109	0.336317868429293	KLF4/CERS2/IGF1R	3
GO:1902235	regulation of endoplasmic reticulum stress-induced intrinsic apoptotic signaling pathway	3/580	34/18805	0.0882352941176471	2.86080121703854	1.93731876301655	0.0863853981586496	0.380839740973109	0.336317868429293	PMAIP1/HSPA1A/EIF2AK3	3
GO:0003012	muscle system process	20/580	467/18805	0.0428265524625268	1.3885402052721	1.51678411214863	0.0881426059414088	0.386345061905698	0.341179592671455	CALM2/IL6ST/JUP/FKBP1A/IGFBP5/KCNE4/SORBS2/ABAT/APBB2/CXCR4/TPM4/RGS2/FOXP1/PTGER3/TNF/PPP3CA/MAP2K3/NPNT/CYBA/TNNT1	20
GO:0072594	establishment of protein localization to organelle	20/580	467/18805	0.0428265524625268	1.3885402052721	1.51678411214863	0.0881426059414088	0.386345061905698	0.341179592671455	JUP/MED1/BAG3/NDUFA13/SPIDR/PEX2/CLU/LEPROT/NUP62/DNAJC15/NUP98/ZFAND2A/IMMP2L/GDAP1/NRARP/RHOU/SEC62/PPP3CA/UBAP1/PIK3R1	20
GO:0001657	ureteric bud development	6/580	100/18805	0.06	1.94534482758621	1.69089541143461	0.0888995907542919	0.386345061905698	0.341179592671455	MYC/BASP1/GPC3/ROBO2/HOXB7/NPNT	6
GO:0006637	acyl-CoA metabolic process	6/580	100/18805	0.06	1.94534482758621	1.69089541143461	0.0888995907542919	0.386345061905698	0.341179592671455	ACLY/ELOVL5/OGDH/MPC2/SLC27A2/FAR1	6
GO:0035383	thioester metabolic process	6/580	100/18805	0.06	1.94534482758621	1.69089541143461	0.0888995907542919	0.386345061905698	0.341179592671455	ACLY/ELOVL5/OGDH/MPC2/SLC27A2/FAR1	6
GO:0048488	synaptic vesicle endocytosis	5/580	77/18805	0.0649350649350649	2.10535154500672	1.73382569327597	0.0891754371260236	0.386345061905698	0.341179592671455	ARPC3/MX1/AMPH/VAMP2/ITSN2	5
GO:0015749	monosaccharide transmembrane transport	7/580	124/18805	0.0564516129032258	1.83029755283648	1.65481668011718	0.0892747499226048	0.386345061905698	0.341179592671455	PEA15/ZDHHC7/IRS1/GPC3/TNF/INSR/PIK3R1	7
GO:0043500	muscle adaptation	7/580	124/18805	0.0564516129032258	1.83029755283648	1.65481668011718	0.0892747499226048	0.386345061905698	0.341179592671455	IL6ST/IGFBP5/RGS2/FOXP1/PPP3CA/CYBA/TNNT1	7
GO:0002204	somatic recombination of immunoglobulin genes involved in immune response	4/580	55/18805	0.0727272727272727	2.35799373040752	1.79921814862156	0.0892837606729524	0.386345061905698	0.341179592671455	BCL6/HMCES/EXOSC6/NFKBIZ	4
GO:0002208	somatic diversification of immunoglobulins involved in immune response	4/580	55/18805	0.0727272727272727	2.35799373040752	1.79921814862156	0.0892837606729524	0.386345061905698	0.341179592671455	BCL6/HMCES/EXOSC6/NFKBIZ	4
GO:0006110	regulation of glycolytic process	4/580	55/18805	0.0727272727272727	2.35799373040752	1.79921814862156	0.0892837606729524	0.386345061905698	0.341179592671455	IER3/EIF6/PPP2CA/INSR	4
GO:0010332	response to gamma radiation	4/580	55/18805	0.0727272727272727	2.35799373040752	1.79921814862156	0.0892837606729524	0.386345061905698	0.341179592671455	RPL26/MYC/YAP1/TSPYL5	4
GO:0010883	regulation of lipid storage	4/580	55/18805	0.0727272727272727	2.35799373040752	1.79921814862156	0.0892837606729524	0.386345061905698	0.341179592671455	EHD1/HILPDA/TNF/FTO	4
GO:0030811	regulation of nucleotide catabolic process	4/580	55/18805	0.0727272727272727	2.35799373040752	1.79921814862156	0.0892837606729524	0.386345061905698	0.341179592671455	IER3/EIF6/PPP2CA/INSR	4
GO:0032924	activin receptor signaling pathway	4/580	55/18805	0.0727272727272727	2.35799373040752	1.79921814862156	0.0892837606729524	0.386345061905698	0.341179592671455	FKBP1A/CSNK2B/IGSF1/BMPR1B	4
GO:0033121	regulation of purine nucleotide catabolic process	4/580	55/18805	0.0727272727272727	2.35799373040752	1.79921814862156	0.0892837606729524	0.386345061905698	0.341179592671455	IER3/EIF6/PPP2CA/INSR	4
GO:0034198	cellular response to amino acid starvation	4/580	55/18805	0.0727272727272727	2.35799373040752	1.79921814862156	0.0892837606729524	0.386345061905698	0.341179592671455	SLC38A2/SEH1L/WDR24/EIF2AK3	4
GO:0042743	hydrogen peroxide metabolic process	4/580	55/18805	0.0727272727272727	2.35799373040752	1.79921814862156	0.0892837606729524	0.386345061905698	0.341179592671455	PRDX2/NNT/PXDNL/CYBA	4
GO:0045190	isotype switching	4/580	55/18805	0.0727272727272727	2.35799373040752	1.79921814862156	0.0892837606729524	0.386345061905698	0.341179592671455	BCL6/HMCES/EXOSC6/NFKBIZ	4
GO:0030324	lung development	10/580	199/18805	0.050251256281407	1.62926702477907	1.59199006677067	0.0893113720272561	0.386345061905698	0.341179592671455	PGR/IGFBP5/AGR2/ITGB6/KLF2/GPC3/BLOC1S6/YAP1/TNF/EXT1	10
GO:0009913	epidermal cell differentiation	12/580	251/18805	0.047808764940239	1.55007555982965	1.56511330570042	0.0894297576162664	0.386494271424146	0.341311358928478	KLF4/ZFP36/MED1/S100A7/KRT7/OVOL1/MAFB/MSX2/CSTA/YAP1/NFKBIZ/PPP3CA	12
GO:0051896	regulation of phosphatidylinositol 3-kinase/protein kinase B signal transduction	13/580	278/18805	0.0467625899280576	1.51615604068469	1.54670044718861	0.0905517130806008	0.390662422237829	0.34499223423148	AMBRA1/PDCD6/TPBG/IGFBP5/IGF1R/GDF15/PPP2CA/IRS1/SEMA3E/TNF/TSPYL5/INSR/ERBB3	13
GO:0034614	cellular response to reactive oxygen species	8/580	149/18805	0.0536912751677852	1.74080074056931	1.61953607024596	0.0905638087584113	0.390662422237829	0.34499223423148	PRDX2/PCGF2/PEX2/MYB/KLF2/RIPK1/FOXP1/ENDOG	8
GO:0010506	regulation of autophagy	16/580	359/18805	0.0445682451253482	1.4450100854865	1.51869766566563	0.0910983681530564	0.39206555424289	0.346231333816679	AMBRA1/MCL1/BAG3/HSPB8/PYCARD/ATP13A2/PLK2/EXOC4/DEPP1/PIP4K2B/ENDOG/SNX30/WDR24/FOXK2/HTT/SPTLC2	16
GO:0001934	positive regulation of protein phosphorylation	18/580	414/18805	0.0434782608695652	1.40967016491754	1.50361685244342	0.0915130792530406	0.39206555424289	0.346231333816679	CALM2/TRAF4/JTB/EFNA1/CDK2AP1/LTF/AKTIP/RIPK1/PIM1/PPP2CA/PFN2/RAF1/TNF/MAP2K3/TNIK/AREG/INSR/LIMCH1	18
GO:0071229	cellular response to acid chemical	6/580	101/18805	0.0594059405940594	1.92608398770912	1.66475054101205	0.0921963336291715	0.39206555424289	0.346231333816679	CEBPB/SOCS1/KLF2/GCLC/TNF/NEURL1	6
GO:0072080	nephron tubule development	6/580	101/18805	0.0594059405940594	1.92608398770912	1.66475054101205	0.0921963336291715	0.39206555424289	0.346231333816679	MYC/TFAP2B/GPC3/HOXB7/YAP1/NPNT	6
GO:0072163	mesonephric epithelium development	6/580	101/18805	0.0594059405940594	1.92608398770912	1.66475054101205	0.0921963336291715	0.39206555424289	0.346231333816679	MYC/BASP1/GPC3/ROBO2/HOXB7/NPNT	6
GO:0072164	mesonephric tubule development	6/580	101/18805	0.0594059405940594	1.92608398770912	1.66475054101205	0.0921963336291715	0.39206555424289	0.346231333816679	MYC/BASP1/GPC3/ROBO2/HOXB7/NPNT	6
GO:0000038	very long-chain fatty acid metabolic process	3/580	35/18805	0.0857142857142857	2.77906403940887	1.87931169629762	0.0924209229233294	0.39206555424289	0.346231333816679	ELOVL5/PEX2/SLC27A2	3
GO:0006891	intra-Golgi vesicle-mediated transport	3/580	35/18805	0.0857142857142857	2.77906403940887	1.87931169629762	0.0924209229233294	0.39206555424289	0.346231333816679	NAPA/NSF/TRAPPC10	3
GO:0008053	mitochondrial fusion	3/580	35/18805	0.0857142857142857	2.77906403940887	1.87931169629762	0.0924209229233294	0.39206555424289	0.346231333816679	CHCHD3/MCL1/GDAP1	3
GO:0021772	olfactory bulb development	3/580	35/18805	0.0857142857142857	2.77906403940887	1.87931169629762	0.0924209229233294	0.39206555424289	0.346231333816679	OGDH/ROBO2/EXT1	3
GO:0032633	interleukin-4 production	3/580	35/18805	0.0857142857142857	2.77906403940887	1.87931169629762	0.0924209229233294	0.39206555424289	0.346231333816679	CEBPB/LEF1/ZFPM1	3
GO:0032673	regulation of interleukin-4 production	3/580	35/18805	0.0857142857142857	2.77906403940887	1.87931169629762	0.0924209229233294	0.39206555424289	0.346231333816679	CEBPB/LEF1/ZFPM1	3
GO:0034063	stress granule assembly	3/580	35/18805	0.0857142857142857	2.77906403940887	1.87931169629762	0.0924209229233294	0.39206555424289	0.346231333816679	G3BP2/YTHDF3/TIA1	3
GO:0045940	positive regulation of steroid metabolic process	3/580	35/18805	0.0857142857142857	2.77906403940887	1.87931169629762	0.0924209229233294	0.39206555424289	0.346231333816679	IGF1R/ADM/TNF	3
GO:0046320	regulation of fatty acid oxidation	3/580	35/18805	0.0857142857142857	2.77906403940887	1.87931169629762	0.0924209229233294	0.39206555424289	0.346231333816679	GDF15/IRS1/MFSD2A	3
GO:0060544	regulation of necroptotic process	3/580	35/18805	0.0857142857142857	2.77906403940887	1.87931169629762	0.0924209229233294	0.39206555424289	0.346231333816679	CYLD/RIPK1/PELI1	3
GO:0110110	positive regulation of animal organ morphogenesis	3/580	35/18805	0.0857142857142857	2.77906403940887	1.87931169629762	0.0924209229233294	0.39206555424289	0.346231333816679	FRS2/MESP1/ROBO2	3
GO:2000406	positive regulation of T cell migration	3/580	35/18805	0.0857142857142857	2.77906403940887	1.87931169629762	0.0924209229233294	0.39206555424289	0.346231333816679	S100A7/PYCARD/STK39	3
GO:0002200	somatic diversification of immune receptors	5/580	78/18805	0.0641025641025641	2.07835985853227	1.70248094085552	0.0930051820289796	0.393818817653961	0.347779632877328	BCL6/LEF1/HMCES/EXOSC6/NFKBIZ	5
GO:0007585	respiratory gaseous exchange by respiratory system	5/580	78/18805	0.0641025641025641	2.07835985853227	1.70248094085552	0.0930051820289796	0.393818817653961	0.347779632877328	TRAF4/MAFB/GLS/BLOC1S6/FTO	5
GO:0001954	positive regulation of cell-matrix adhesion	4/580	56/18805	0.0714285714285714	2.31588669950739	1.75925504761729	0.0939339346115894	0.394856877035412	0.348696338464777	JUP/EPB41L5/SKAP1/CEACAM6	4
GO:0007140	male meiotic nuclear division	4/580	56/18805	0.0714285714285714	2.31588669950739	1.75925504761729	0.0939339346115894	0.394856877035412	0.348696338464777	TEX14/HSPA2/SYCP2/TDRKH	4
GO:0036230	granulocyte activation	4/580	56/18805	0.0714285714285714	2.31588669950739	1.75925504761729	0.0939339346115894	0.394856877035412	0.348696338464777	PREX1/VAMP2/CXCL8/TNF	4
GO:0046605	regulation of centrosome cycle	4/580	56/18805	0.0714285714285714	2.31588669950739	1.75925504761729	0.0939339346115894	0.394856877035412	0.348696338464777	CCNL2/PLK2/NUP62/KAT2A	4
GO:1902895	positive regulation of miRNA transcription	4/580	56/18805	0.0714285714285714	2.31588669950739	1.75925504761729	0.0939339346115894	0.394856877035412	0.348696338464777	KLF4/MYC/MYB/TNF	4
GO:0002076	osteoblast development	2/580	17/18805	0.117647058823529	3.81440162271805	2.07097857980527	0.0952216171882663	0.394856877035412	0.348696338464777	JUND/MSX2	2
GO:0002679	respiratory burst involved in defense response	2/580	17/18805	0.117647058823529	3.81440162271805	2.07097857980527	0.0952216171882663	0.394856877035412	0.348696338464777	PRDX2/S100A9	2
GO:0010042	response to manganese ion	2/580	17/18805	0.117647058823529	3.81440162271805	2.07097857980527	0.0952216171882663	0.394856877035412	0.348696338464777	ATP13A2/EIF2AK3	2
GO:0021535	cell migration in hindbrain	2/580	17/18805	0.117647058823529	3.81440162271805	2.07097857980527	0.0952216171882663	0.394856877035412	0.348696338464777	LEF1/DAB1	2
GO:0031645	negative regulation of nervous system process	2/580	17/18805	0.117647058823529	3.81440162271805	2.07097857980527	0.0952216171882663	0.394856877035412	0.348696338464777	TNF/EIF2AK3	2
GO:0033623	regulation of integrin activation	2/580	17/18805	0.117647058823529	3.81440162271805	2.07097857980527	0.0952216171882663	0.394856877035412	0.348696338464777	SKAP1/FARP2	2
GO:0042448	progesterone metabolic process	2/580	17/18805	0.117647058823529	3.81440162271805	2.07097857980527	0.0952216171882663	0.394856877035412	0.348696338464777	STARD3/ADM	2
GO:0045725	positive regulation of glycogen biosynthetic process	2/580	17/18805	0.117647058823529	3.81440162271805	2.07097857980527	0.0952216171882663	0.394856877035412	0.348696338464777	IRS1/INSR	2
GO:0051782	negative regulation of cell division	2/580	17/18805	0.117647058823529	3.81440162271805	2.07097857980527	0.0952216171882663	0.394856877035412	0.348696338464777	MYC/TEX14	2
GO:0055091	phospholipid homeostasis	2/580	17/18805	0.117647058823529	3.81440162271805	2.07097857980527	0.0952216171882663	0.394856877035412	0.348696338464777	TLCD1/ITGB6	2
GO:0060253	negative regulation of glial cell proliferation	2/580	17/18805	0.117647058823529	3.81440162271805	2.07097857980527	0.0952216171882663	0.394856877035412	0.348696338464777	CERS2/CDKN2B	2
GO:0070254	mucus secretion	2/580	17/18805	0.117647058823529	3.81440162271805	2.07097857980527	0.0952216171882663	0.394856877035412	0.348696338464777	AGR2/CYBA	2
GO:0070920	regulation of regulatory ncRNA processing	2/580	17/18805	0.117647058823529	3.81440162271805	2.07097857980527	0.0952216171882663	0.394856877035412	0.348696338464777	RIPK1/HOXB-AS3	2
GO:0072074	kidney mesenchyme development	2/580	17/18805	0.117647058823529	3.81440162271805	2.07097857980527	0.0952216171882663	0.394856877035412	0.348696338464777	MYC/BASP1	2
GO:0090136	epithelial cell-cell adhesion	2/580	17/18805	0.117647058823529	3.81440162271805	2.07097857980527	0.0952216171882663	0.394856877035412	0.348696338464777	PLEKHA7/JUP	2
GO:0098885	modification of postsynaptic actin cytoskeleton	2/580	17/18805	0.117647058823529	3.81440162271805	2.07097857980527	0.0952216171882663	0.394856877035412	0.348696338464777	CAP2/PFN2	2
GO:1900119	positive regulation of execution phase of apoptosis	2/580	17/18805	0.117647058823529	3.81440162271805	2.07097857980527	0.0952216171882663	0.394856877035412	0.348696338464777	NDUFA13/RIPK1	2
GO:2000345	regulation of hepatocyte proliferation	2/580	17/18805	0.117647058823529	3.81440162271805	2.07097857980527	0.0952216171882663	0.394856877035412	0.348696338464777	MED1/TNF	2
GO:0022898	regulation of transmembrane transporter activity	9/580	176/18805	0.0511363636363636	1.65796434169279	1.56447731345908	0.0953525425991199	0.395044212009124	0.348861773140476	CALM2/FKBP1A/KCNE4/STK39/VAMP2/RIPK1/PIM1/LRRC26/HTT	9
GO:0050773	regulation of dendrite development	6/580	102/18805	0.0588235294117647	1.90720081135903	1.63890291792137	0.0955583399627532	0.395541125074936	0.34930059484186	SLC30A1/PREX1/NFATC4/MFSD2A/PPP3CA/TNIK	6
GO:1990778	protein localization to cell periphery	16/580	362/18805	0.0441988950276243	1.43303486378358	1.48411212983025	0.0961786933549632	0.397489716222064	0.351021386950814	TPBG/JUP/TSPAN15/RAMP1/AGR2/RAB13/ZDHHC5/NSF/VAMP2/PACS2/SKAP1/ZDHHC7/EHD1/TNF/TNIK/PIK3R1	16
GO:0055001	muscle cell development	10/580	202/18805	0.0495049504950495	1.6050699897576	1.54239338717264	0.0962016569541137	0.397489716222064	0.351021386950814	ADM/SORBS2/SMYD3/FHL2/RGS2/FOXP1/NFATC4/KRT19/PPP3CA/TNNT1	10
GO:0071560	cellular response to transforming growth factor beta stimulus	14/580	308/18805	0.0454545454545455	1.4737460815047	1.49546306171921	0.0966750196199668	0.399087648198196	0.352432513517423	FKBP1A/EPB41L5/IGF1R/GDF15/ITGB6/HSPA1A/CDKN1C/WWOX/SAP30/NFKBIZ/TGFBR3/CDKN2B/NPNT/PMEPA1	14
GO:0140056	organelle localization by membrane tethering	5/580	79/18805	0.0632911392405063	2.05205150589262	1.67160394729963	0.0969179942132372	0.399732497171337	0.353001976755559	YKT6/EXOC2/EXOC4/PACS2/BLOC1S6	5
GO:1902905	positive regulation of supramolecular fiber organization	9/580	177/18805	0.0508474576271186	1.64859731151373	1.54662139004156	0.0978850833105657	0.401796879960342	0.354825023944506	BAIAP2L1/PYCARD/HSPA1A/CLU/PFN2/MAP1B/USP8/HSPA1B/LIMCH1	9
GO:0030833	regulation of actin filament polymerization	7/580	127/18805	0.0551181102362205	1.78706217757263	1.58763647234767	0.0982315602699453	0.401796879960342	0.354825023944506	ARPC3/SPTAN1/BAIAP2L1/ADD3/PYCARD/PREX1/PFN2	7
GO:0072655	establishment of protein localization to mitochondrion	7/580	127/18805	0.0551181102362205	1.78706217757263	1.58763647234767	0.0982315602699453	0.401796879960342	0.354825023944506	BAG3/NDUFA13/LEPROT/DNAJC15/IMMP2L/GDAP1/RHOU	7
GO:0001975	response to amphetamine	3/580	36/18805	0.0833333333333333	2.70186781609195	1.82331564399049	0.0986254571922847	0.401796879960342	0.354825023944506	FOSB/RGS2/PPP3CA	3
GO:0016180	snRNA processing	3/580	36/18805	0.0833333333333333	2.70186781609195	1.82331564399049	0.0986254571922847	0.401796879960342	0.354825023944506	EXOSC6/LARP7/FTO	3
GO:0021884	forebrain neuron development	3/580	36/18805	0.0833333333333333	2.70186781609195	1.82331564399049	0.0986254571922847	0.401796879960342	0.354825023944506	OGDH/SEMA3E/ROBO2	3
GO:0033687	osteoblast proliferation	3/580	36/18805	0.0833333333333333	2.70186781609195	1.82331564399049	0.0986254571922847	0.401796879960342	0.354825023944506	JUNB/IGF1R/LTF	3
GO:0034143	regulation of toll-like receptor 4 signaling pathway	3/580	36/18805	0.0833333333333333	2.70186781609195	1.82331564399049	0.0986254571922847	0.401796879960342	0.354825023944506	LTF/PELI1/PIK3R1	3
GO:0034405	response to fluid shear stress	3/580	36/18805	0.0833333333333333	2.70186781609195	1.82331564399049	0.0986254571922847	0.401796879960342	0.354825023944506	KLF4/TFPI2/KLF2	3
GO:1901797	negative regulation of signal transduction by p53 class mediator	3/580	36/18805	0.0833333333333333	2.70186781609195	1.82331564399049	0.0986254571922847	0.401796879960342	0.354825023944506	SNAI1/TAF9/MUC1	3
GO:0000381	regulation of alternative mRNA splicing, via spliceosome	4/580	57/18805	0.0701754385964912	2.27525710828796	1.72013708054344	0.0986963785107496	0.401796879960342	0.354825023944506	HNRNPA1/RBM15B/TIA1/RBM24	4
GO:0034205	amyloid-beta formation	4/580	57/18805	0.0701754385964912	2.27525710828796	1.72013708054344	0.0986963785107496	0.401796879960342	0.354825023944506	EFNA1/CLU/PSENEN/TNF	4
GO:0071385	cellular response to glucocorticoid stimulus	4/580	57/18805	0.0701754385964912	2.27525710828796	1.72013708054344	0.0986963785107496	0.401796879960342	0.354825023944506	ZFP36/IGF1R/SMYD3/USP8	4
GO:1902991	regulation of amyloid precursor protein catabolic process	4/580	57/18805	0.0701754385964912	2.27525710828796	1.72013708054344	0.0986963785107496	0.401796879960342	0.354825023944506	FKBP1A/EFNA1/CLU/TNF	4
GO:0033157	regulation of intracellular protein transport	8/580	152/18805	0.0526315789473684	1.70644283121597	1.56001875927568	0.0987267349935115	0.401796879960342	0.354825023944506	OAZ1/JUP/BAG3/ATP13A2/TMEM30B/VAMP2/FRAT2/PIK3R1	8
GO:0048863	stem cell differentiation	12/580	256/18805	0.046875	1.51980064655172	1.49383247655244	0.0996938488943271	0.405374723615327	0.357984601641264	CDK12/PDCD6/ESR1/ZFP36/MED1/CHD4/MSX2/SEMA3E/RBM24/EPOP/YAP1/EXT1	12
GO:0009185	ribonucleoside diphosphate metabolic process	7/580	128/18805	0.0546875	1.77310075431034	1.5656434736311	0.101323200466556	0.411273995197732	0.363194221936694	OGDH/IER3/EIF6/PPP2CA/FOXK2/ENO2/INSR	7
GO:0030282	bone mineralization	7/580	128/18805	0.0546875	1.77310075431034	1.5656434736311	0.101323200466556	0.411273995197732	0.363194221936694	KLF10/LTF/TUFT1/GPC3/ECM1/EIF2AK3/BMPR1B	7
GO:0051222	positive regulation of protein transport	12/580	257/18805	0.0466926070038911	1.51388702535892	1.47975910315412	0.101828301115116	0.41296037256808	0.364683454234547	OAZ1/JUP/BAG3/ATP13A2/MPC2/ABAT/TMEM30B/VAMP2/IER3IP1/TNF/MYO18A/PIK3R1	12
GO:0016052	carbohydrate catabolic process	9/580	179/18805	0.0502793296089385	1.63017722982084	1.5112446363621	0.10306579221787	0.41457590061066	0.366110119808575	OGDH/IER3/EIF6/PPP2CA/FOXK2/SORD/ENO2/INSR/AGL	9
GO:0006826	iron ion transport	4/580	58/18805	0.0689655172413793	2.23602853745541	1.68182945578563	0.103568955971383	0.41457590061066	0.366110119808575	LTF/STEAP4/SLC46A1/LCN2	4
GO:0010656	negative regulation of muscle cell apoptotic process	4/580	58/18805	0.0689655172413793	2.23602853745541	1.68182945578563	0.103568955971383	0.41457590061066	0.366110119808575	AMBRA1/ESR1/BAG3/IGF1R	4
GO:0015804	neutral amino acid transport	4/580	58/18805	0.0689655172413793	2.23602853745541	1.68182945578563	0.103568955971383	0.41457590061066	0.366110119808575	SLC38A2/SERINC5/RGS2/SLC43A1	4
GO:0018209	peptidyl-serine modification	8/580	154/18805	0.051948051948052	1.68428123600537	1.52107027752889	0.10439199541751	0.41457590061066	0.366110119808575	GADD45A/PLK2/STK39/RIPK1/PFN2/RAF1/TNF/EIF2AK3	8
GO:0003231	cardiac ventricle development	7/580	129/18805	0.0542635658914729	1.75935578722267	1.54384458629118	0.104467373990795	0.41457590061066	0.366110119808575	FRS2/MED1/FKBP1A/MESP1/ZFPM1/ROBO2/TGFBR3	7
GO:0048644	muscle organ morphogenesis	5/580	81/18805	0.0617283950617284	2.00138356747552	1.61119833043652	0.104989004555551	0.41457590061066	0.366110119808575	MED1/FKBP1A/ZFPM1/TGFBR3/ARID5B	5
GO:0003230	cardiac atrium development	3/580	37/18805	0.0810810810810811	2.62884436160298	1.76919947990598	0.104993003094242	0.41457590061066	0.366110119808575	IGF1R/MESP1/ZFPM1	3
GO:0003382	epithelial cell morphogenesis	3/580	37/18805	0.0810810810810811	2.62884436160298	1.76919947990598	0.104993003094242	0.41457590061066	0.366110119808575	SPINT2/EPB41L5/COL18A1	3
GO:0021988	olfactory lobe development	3/580	37/18805	0.0810810810810811	2.62884436160298	1.76919947990598	0.104993003094242	0.41457590061066	0.366110119808575	OGDH/ROBO2/EXT1	3
GO:0046688	response to copper ion	3/580	37/18805	0.0810810810810811	2.62884436160298	1.76919947990598	0.104993003094242	0.41457590061066	0.366110119808575	MT1X/MT1G/MT2A	3
GO:0051385	response to mineralocorticoid	3/580	37/18805	0.0810810810810811	2.62884436160298	1.76919947990598	0.104993003094242	0.41457590061066	0.366110119808575	FOSB/IGF1R/STK39	3
GO:0060218	hematopoietic stem cell differentiation	3/580	37/18805	0.0810810810810811	2.62884436160298	1.76919947990598	0.104993003094242	0.41457590061066	0.366110119808575	ZFP36/MED1/EXT1	3
GO:0071539	protein localization to centrosome	3/580	37/18805	0.0810810810810811	2.62884436160298	1.76919947990598	0.104993003094242	0.41457590061066	0.366110119808575	NUP62/GOLGB1/HOOK3	3
GO:0099171	presynaptic modulation of chemical synaptic transmission	3/580	37/18805	0.0810810810810811	2.62884436160298	1.76919947990598	0.104993003094242	0.41457590061066	0.366110119808575	FBXL20/PFN2/FXR1	3
GO:1904385	cellular response to angiotensin	3/580	37/18805	0.0810810810810811	2.62884436160298	1.76919947990598	0.104993003094242	0.41457590061066	0.366110119808575	IGF1R/CA2/PPP3CA	3
GO:0001710	mesodermal cell fate commitment	2/580	18/18805	0.111111111111111	3.60249042145594	1.97061608862693	0.10501629607394	0.41457590061066	0.366110119808575	KLF4/MESP1	2
GO:0010310	regulation of hydrogen peroxide metabolic process	2/580	18/18805	0.111111111111111	3.60249042145594	1.97061608862693	0.10501629607394	0.41457590061066	0.366110119808575	PRDX2/NNT	2
GO:0032926	negative regulation of activin receptor signaling pathway	2/580	18/18805	0.111111111111111	3.60249042145594	1.97061608862693	0.10501629607394	0.41457590061066	0.366110119808575	FKBP1A/IGSF1	2
GO:0033631	cell-cell adhesion mediated by integrin	2/580	18/18805	0.111111111111111	3.60249042145594	1.97061608862693	0.10501629607394	0.41457590061066	0.366110119808575	SKAP1/NPNT	2
GO:0035728	response to hepatocyte growth factor	2/580	18/18805	0.111111111111111	3.60249042145594	1.97061608862693	0.10501629607394	0.41457590061066	0.366110119808575	MED1/GCLC	2
GO:0043217	myelin maintenance	2/580	18/18805	0.111111111111111	3.60249042145594	1.97061608862693	0.10501629607394	0.41457590061066	0.366110119808575	CLU/CXCR4	2
GO:0045064	T-helper 2 cell differentiation	2/580	18/18805	0.111111111111111	3.60249042145594	1.97061608862693	0.10501629607394	0.41457590061066	0.366110119808575	BCL6/MYB	2
GO:0048368	lateral mesoderm development	2/580	18/18805	0.111111111111111	3.60249042145594	1.97061608862693	0.10501629607394	0.41457590061066	0.366110119808575	MESP1/YAP1	2
GO:0060576	intestinal epithelial cell development	2/580	18/18805	0.111111111111111	3.60249042145594	1.97061608862693	0.10501629607394	0.41457590061066	0.366110119808575	IL6ST/YAP1	2
GO:0071391	cellular response to estrogen stimulus	2/580	18/18805	0.111111111111111	3.60249042145594	1.97061608862693	0.10501629607394	0.41457590061066	0.366110119808575	ESR1/BCAS3	2
GO:0090281	negative regulation of calcium ion import	2/580	18/18805	0.111111111111111	3.60249042145594	1.97061608862693	0.10501629607394	0.41457590061066	0.366110119808575	SLC30A1/PPP3CA	2
GO:0097396	response to interleukin-17	2/580	18/18805	0.111111111111111	3.60249042145594	1.97061608862693	0.10501629607394	0.41457590061066	0.366110119808575	SOCS3/NFKBIZ	2
GO:0097398	cellular response to interleukin-17	2/580	18/18805	0.111111111111111	3.60249042145594	1.97061608862693	0.10501629607394	0.41457590061066	0.366110119808575	SOCS3/NFKBIZ	2
GO:0098712	L-glutamate import across plasma membrane	2/580	18/18805	0.111111111111111	3.60249042145594	1.97061608862693	0.10501629607394	0.41457590061066	0.366110119808575	ARL6IP1/TNF	2
GO:0110096	cellular response to aldehyde	2/580	18/18805	0.111111111111111	3.60249042145594	1.97061608862693	0.10501629607394	0.41457590061066	0.366110119808575	IGF1R/RDH11	2
GO:0038127	ERBB signaling pathway	9/580	180/18805	0.05	1.62112068965517	1.49372089884659	0.105713724615216	0.41679632041493	0.368070962586385	GAREM1/AGR2/IGF1R/NUP62/RAF1/BCAR3/AREG/INSR/ERBB3	9
GO:0001823	mesonephros development	6/580	105/18805	0.0571428571428571	1.85270935960591	1.56307647127409	0.106031102132906	0.41679632041493	0.368070962586385	MYC/BASP1/GPC3/ROBO2/HOXB7/NPNT	6
GO:0032637	interleukin-8 production	6/580	105/18805	0.0571428571428571	1.85270935960591	1.56307647127409	0.106031102132906	0.41679632041493	0.368070962586385	KLF4/PYCARD/HSPA1A/RIPK1/TNF/HSPA1B	6
GO:0032677	regulation of interleukin-8 production	6/580	105/18805	0.0571428571428571	1.85270935960591	1.56307647127409	0.106031102132906	0.41679632041493	0.368070962586385	KLF4/PYCARD/HSPA1A/RIPK1/TNF/HSPA1B	6
GO:2001252	positive regulation of chromosome organization	6/580	105/18805	0.0571428571428571	1.85270935960591	1.56307647127409	0.106031102132906	0.41679632041493	0.368070962586385	KLF4/MYC/HNRNPA1/NEK7/MAD2L1BP/SMC4	6
GO:0045927	positive regulation of growth	12/580	259/18805	0.0463320463320463	1.50219677805885	1.45179075318457	0.106178637050016	0.417020444066005	0.368268885178187	AGR2/S100A8/CXCR4/BASP1/S100A9/PIM1/YAP1/ITSN2/MAP1B/MFSD2A/TGFBR3/INSR	12
GO:1903038	negative regulation of leukocyte cell-cell adhesion	8/580	155/18805	0.0516129032258065	1.6734149054505	1.50180831813252	0.107291060696778	0.421030593381651	0.371810230066393	CEBPB/PRDX2/KLF4/BCL6/SOCS1/LGALS1/PELI1/NRARP	8
GO:0043244	regulation of protein-containing complex disassembly	7/580	130/18805	0.0538461538461538	1.74582228116711	1.52223629976084	0.10766374947766	0.421774569594879	0.372467232125988	SPTAN1/ADD3/IGF1R/MID1IP1/MAP1B/TNF/INSR	7
GO:0055007	cardiac muscle cell differentiation	7/580	130/18805	0.0538461538461538	1.74582228116711	1.52223629976084	0.10766374947766	0.421774569594879	0.372467232125988	FRS2/SORBS2/MESP1/FHL2/RGS2/FOXP1/KAT2A	7
GO:0043603	amide metabolic process	20/580	480/18805	0.0416666666666667	1.35093390804598	1.38940644584335	0.107832573151864	0.422077030170463	0.372734333704738	SPTSSA/GSTM3/ACLY/ELOVL5/CERS2/EFNA1/OGDH/SPTSSB/MPC2/CLU/PSENEN/PAM/GCLC/SLC27A2/PCSK1N/BLOC1S6/FAR1/SLC46A1/TNF/SPTLC2	20
GO:0030705	cytoskeleton-dependent intracellular transport	10/580	207/18805	0.0483091787439614	1.56630018324171	1.46151777876301	0.108363260364069	0.422728019000217	0.373309219022732	BAG3/LCA5L/BLOC1S1/F8A1/BLOC1S6/NEFH/DYNC1I2/MAP1B/HTT/HOOK3	10
GO:0030178	negative regulation of Wnt signaling pathway	9/580	181/18805	0.0497237569060773	1.61216422175653	1.47630502821429	0.108399861300187	0.422728019000217	0.373309219022732	IGFBP4/IGFBP2/TPBG/AMFR/MESP1/CYLD/WWOX/GPC3/NFATC4	9
GO:0031929	TOR signaling	9/580	181/18805	0.0497237569060773	1.61216422175653	1.47630502821429	0.108399861300187	0.422728019000217	0.373309219022732	PDCD6/PREX1/PIM1/SEH1L/USP32/ENDOG/WDR24/GNA12/PELI1	9
GO:1903034	regulation of response to wounding	9/580	181/18805	0.0497237569060773	1.61216422175653	1.47630502821429	0.108399861300187	0.422728019000217	0.373309219022732	PRDX2/KLF4/CERS2/IGF1R/VKORC1/CXCR4/PLAT/TNF/SLC12A2	9
GO:0002381	immunoglobulin production involved in immunoglobulin-mediated immune response	4/580	59/18805	0.0677966101694915	2.19812974868498	1.6442994083903	0.108549434876765	0.422728019000217	0.373309219022732	BCL6/HMCES/EXOSC6/NFKBIZ	4
GO:2000107	negative regulation of leukocyte apoptotic process	4/580	59/18805	0.0677966101694915	2.19812974868498	1.6442994083903	0.108549434876765	0.422728019000217	0.373309219022732	TSC22D3/EFNA1/BCL6/FOXP1	4
GO:0007517	muscle organ development	16/580	369/18805	0.043360433604336	1.40584992056817	1.40459348023965	0.108711803495597	0.423002769175859	0.373551849671482	MED1/FKBP1A/BASP1/LEF1/ZFPM1/BTBD1/RBM24/SAP30/TGFBR3/EGR3/NEURL1/FXR1/PPP3CA/GPCPD1/ARID5B/ERBB3	16
GO:0043537	negative regulation of blood vessel endothelial cell migration	5/580	82/18805	0.0609756097560976	1.97697645079899	1.58164368842422	0.109145142249544	0.423972740593298	0.374408427083065	KLF4/JUP/GADD45A/CSNK2B/TNF	5
GO:2000142	regulation of DNA-templated transcription initiation	5/580	82/18805	0.0609756097560976	1.97697645079899	1.58164368842422	0.109145142249544	0.423972740593298	0.374408427083065	MYC/MED1/BCLAF1/MED14/TAF9	5
GO:0048008	platelet-derived growth factor receptor signaling pathway	6/580	106/18805	0.0566037735849057	1.83523096942095	1.53835185826845	0.109649126155805	0.424094856129895	0.374516266766144	IGF1R/TIPARP/PLAT/CSRNP1/INSR/ARID5B	6
GO:0061326	renal tubule development	6/580	106/18805	0.0566037735849057	1.83523096942095	1.53835185826845	0.109649126155805	0.424094856129895	0.374516266766144	MYC/TFAP2B/GPC3/HOXB7/YAP1/NPNT	6
GO:0035296	regulation of tube diameter	8/580	156/18805	0.0512820512820513	1.66268788682582	1.48268504296488	0.110234123456137	0.424094856129895	0.374516266766144	ADD3/ADM/KLF2/RGS2/GCLC/BLOC1S6/TNF/EXT1	8
GO:0097746	blood vessel diameter maintenance	8/580	156/18805	0.0512820512820513	1.66268788682582	1.48268504296488	0.110234123456137	0.424094856129895	0.374516266766144	ADD3/ADM/KLF2/RGS2/GCLC/BLOC1S6/TNF/EXT1	8
GO:0071559	response to transforming growth factor beta	14/580	315/18805	0.0444444444444444	1.44099616858238	1.40807888864177	0.110403636684687	0.424094856129895	0.374516266766144	FKBP1A/EPB41L5/IGF1R/GDF15/ITGB6/HSPA1A/CDKN1C/WWOX/SAP30/NFKBIZ/TGFBR3/CDKN2B/NPNT/PMEPA1	14
GO:0007259	cell surface receptor signaling pathway via JAK-STAT	7/580	131/18805	0.0534351145038168	1.73249539352461	1.50081519477395	0.1109119692722	0.424094856129895	0.374516266766144	GADD45A/ELP2/SOCS3/SOCS1/LEPROT/DAB1/TNF	7
GO:0043200	response to amino acid	7/580	131/18805	0.0534351145038168	1.73249539352461	1.50081519477395	0.1109119692722	0.424094856129895	0.374516266766144	CEBPB/IGF1R/SOCS1/GCLC/TAF9/TNF/NEURL1	7
GO:0046718	symbiont entry into host cell	7/580	131/18805	0.0534351145038168	1.73249539352461	1.50081519477395	0.1109119692722	0.424094856129895	0.374516266766144	ITGB6/HSPA1A/CXCR4/TMPRSS2/LGALS1/HSPA1B/INSR	7
GO:0017015	regulation of transforming growth factor beta receptor signaling pathway	9/580	182/18805	0.0494505494505494	1.60330617658204	1.4589956380961	0.111124048820315	0.424094856129895	0.374516266766144	FKBP1A/GDF15/HSPA1A/CDKN1C/SAP30/TGFBR3/CDKN2B/NPNT/PMEPA1	9
GO:0002335	mature B cell differentiation	3/580	38/18805	0.0789473684210526	2.55966424682396	1.71684400975195	0.111517459642762	0.424094856129895	0.374516266766144	BCL6/LGALS1/NFKBIZ	3
GO:0010669	epithelial structure maintenance	3/580	38/18805	0.0789473684210526	2.55966424682396	1.71684400975195	0.111517459642762	0.424094856129895	0.374516266766144	TFF3/TFF1/LDB1	3
GO:0019081	viral translation	3/580	38/18805	0.0789473684210526	2.55966424682396	1.71684400975195	0.111517459642762	0.424094856129895	0.374516266766144	OAZ1/TMPRSS2/EIF2D	3
GO:0031112	positive regulation of microtubule polymerization or depolymerization	3/580	38/18805	0.0789473684210526	2.55966424682396	1.71684400975195	0.111517459642762	0.424094856129895	0.374516266766144	HSPA1A/MAP1B/HSPA1B	3
GO:0034121	regulation of toll-like receptor signaling pathway	3/580	38/18805	0.0789473684210526	2.55966424682396	1.71684400975195	0.111517459642762	0.424094856129895	0.374516266766144	ESR1/S100A8/S100A9	3
GO:0043243	positive regulation of protein-containing complex disassembly	3/580	38/18805	0.0789473684210526	2.55966424682396	1.71684400975195	0.111517459642762	0.424094856129895	0.374516266766144	IGF1R/TNF/INSR	3
GO:0043372	positive regulation of CD4-positive, alpha-beta T cell differentiation	3/580	38/18805	0.0789473684210526	2.55966424682396	1.71684400975195	0.111517459642762	0.424094856129895	0.374516266766144	BRD2/SOCS1/NFKBIZ	3
GO:0045191	regulation of isotype switching	3/580	38/18805	0.0789473684210526	2.55966424682396	1.71684400975195	0.111517459642762	0.424094856129895	0.374516266766144	BCL6/HMCES/EXOSC6	3
GO:0055023	positive regulation of cardiac muscle tissue growth	3/580	38/18805	0.0789473684210526	2.55966424682396	1.71684400975195	0.111517459642762	0.424094856129895	0.374516266766144	PIM1/YAP1/TGFBR3	3
GO:0070316	regulation of G0 to G1 transition	3/580	38/18805	0.0789473684210526	2.55966424682396	1.71684400975195	0.111517459642762	0.424094856129895	0.374516266766144	MED1/SMARCC2/CDKN2B	3
GO:1905508	protein localization to microtubule organizing center	3/580	38/18805	0.0789473684210526	2.55966424682396	1.71684400975195	0.111517459642762	0.424094856129895	0.374516266766144	NUP62/GOLGB1/HOOK3	3
GO:0001666	response to hypoxia	14/580	316/18805	0.0443037974683544	1.43643605412484	1.39576659541158	0.112455298054369	0.424094856129895	0.374516266766144	PMAIP1/MYC/GNGT1/ADM/ABAT/MYB/CXCR4/PLAT/ENDOG/HILPDA/TNF/TGFBR3/PDLIM1/ITPR2	14
GO:0007178	cell surface receptor protein serine/threonine kinase signaling pathway	18/580	427/18805	0.0421545667447307	1.36675280626666	1.36755124446833	0.113094240861641	0.424094856129895	0.374516266766144	FKBP1A/GDF15/ITGB6/CSNK2B/TFAP2B/HSPA1A/CDKN1C/LEF1/MSX2/GPC3/SAP30/IGSF1/TGFBR3/CDKN2B/EXT1/BMPR1B/NPNT/PMEPA1	18
GO:0035150	regulation of tube size	8/580	157/18805	0.0509554140127389	1.65209751811992	1.46369838208749	0.113220940784863	0.424094856129895	0.374516266766144	ADD3/ADM/KLF2/RGS2/GCLC/BLOC1S6/TNF/EXT1	8
GO:0014897	striated muscle hypertrophy	6/580	107/18805	0.0560747663551402	1.81807927811795	1.51389255361732	0.113329700303093	0.424094856129895	0.374516266766144	IL6ST/IGFBP5/SORBS2/RGS2/FOXP1/PPP3CA	6
GO:0019395	fatty acid oxidation	6/580	107/18805	0.0560747663551402	1.81807927811795	1.51389255361732	0.113329700303093	0.424094856129895	0.374516266766144	GDF15/PEX2/IRS1/SLC27A2/MFSD2A/ETFB	6
GO:0006446	regulation of translational initiation	5/580	83/18805	0.0602409638554217	1.95315745741587	1.55250470629727	0.113380230947107	0.424094856129895	0.374516266766144	PPP1R15A/YTHDF3/TNF/EIF2AK3/EIF5B	5
GO:0030203	glycosaminoglycan metabolic process	5/580	83/18805	0.0602409638554217	1.95315745741587	1.55250470629727	0.113380230947107	0.424094856129895	0.374516266766144	UGDH/SLC35B2/IDS/PGLYRP2/EXT1	5
GO:0061053	somite development	5/580	83/18805	0.0602409638554217	1.95315745741587	1.55250470629727	0.113380230947107	0.424094856129895	0.374516266766144	EPB41L5/MESP1/LEF1/KAT2A/NRARP	5
GO:0070972	protein localization to endoplasmic reticulum	5/580	83/18805	0.0602409638554217	1.95315745741587	1.55250470629727	0.113380230947107	0.424094856129895	0.374516266766144	PPP1R15A/KDELR2/ZFAND2A/BCAP29/SEC62	5
GO:2000027	regulation of animal organ morphogenesis	5/580	83/18805	0.0602409638554217	1.95315745741587	1.55250470629727	0.113380230947107	0.424094856129895	0.374516266766144	FRS2/MESP1/ROBO2/HOXB7/TNF	5
GO:0022408	negative regulation of cell-cell adhesion	10/580	209/18805	0.0478468899521531	1.55131166474179	1.42976909467829	0.113463263238741	0.424094856129895	0.374516266766144	CEBPB/SPINT2/PRDX2/KLF4/BCL6/EPB41L5/SOCS1/LGALS1/PELI1/NRARP	10
GO:0000079	regulation of cyclin-dependent protein serine/threonine kinase activity	4/580	60/18805	0.0666666666666667	2.16149425287356	1.60751604935251	0.113635493998841	0.424094856129895	0.374516266766144	GADD45A/SERTAD1/PIM1/CDKN2B	4
GO:0001541	ovarian follicle development	4/580	60/18805	0.0666666666666667	2.16149425287356	1.60751604935251	0.113635493998841	0.424094856129895	0.374516266766144	CEBPB/ESR1/IMMP2L/BMPR1B	4
GO:0048278	vesicle docking	4/580	60/18805	0.0666666666666667	2.16149425287356	1.60751604935251	0.113635493998841	0.424094856129895	0.374516266766144	YKT6/EXOC2/EXOC4/BLOC1S6	4
GO:0050850	positive regulation of calcium-mediated signaling	4/580	60/18805	0.0666666666666667	2.16149425287356	1.60751604935251	0.113635493998841	0.424094856129895	0.374516266766144	TNF/HTT/PPP3CA/ERBB3	4
GO:0055008	cardiac muscle tissue morphogenesis	4/580	60/18805	0.0666666666666667	2.16149425287356	1.60751604935251	0.113635493998841	0.424094856129895	0.374516266766144	MED1/FKBP1A/ZFPM1/TGFBR3	4
GO:0006839	mitochondrial transport	9/580	183/18805	0.0491803278688525	1.59454494064443	1.44179136785792	0.113886119707394	0.424094856129895	0.374516266766144	STARD3/PMAIP1/NDUFA13/IER3/MPC2/HSPA1A/DNAJC15/GCLC/CNP	9
GO:0001829	trophectodermal cell differentiation	2/580	19/18805	0.105263157894737	3.41288566243194	1.87716	0.115068063851176	0.424094856129895	0.374516266766144	JUNB/YAP1	2
GO:0007190	activation of adenylate cyclase activity	2/580	19/18805	0.105263157894737	3.41288566243194	1.87716	0.115068063851176	0.424094856129895	0.374516266766144	CAP2/RAF1	2
GO:0010421	hydrogen peroxide-mediated programmed cell death	2/580	19/18805	0.105263157894737	3.41288566243194	1.87716	0.115068063851176	0.424094856129895	0.374516266766144	FOXP1/ENDOG	2
GO:0010968	regulation of microtubule nucleation	2/580	19/18805	0.105263157894737	3.41288566243194	1.87716	0.115068063851176	0.424094856129895	0.374516266766144	HSPA1A/HSPA1B	2
GO:0018200	peptidyl-glutamic acid modification	2/580	19/18805	0.105263157894737	3.41288566243194	1.87716	0.115068063851176	0.424094856129895	0.374516266766144	CFAP20/VKORC1	2
GO:0020027	hemoglobin metabolic process	2/580	19/18805	0.105263157894737	3.41288566243194	1.87716	0.115068063851176	0.424094856129895	0.374516266766144	KLF4/LDB1	2
GO:0030206	chondroitin sulfate biosynthetic process	2/580	19/18805	0.105263157894737	3.41288566243194	1.87716	0.115068063851176	0.424094856129895	0.374516266766144	UGDH/SLC35B2	2
GO:0030812	negative regulation of nucleotide catabolic process	2/580	19/18805	0.105263157894737	3.41288566243194	1.87716	0.115068063851176	0.424094856129895	0.374516266766144	IER3/PPP2CA	2
GO:0033122	negative regulation of purine nucleotide catabolic process	2/580	19/18805	0.105263157894737	3.41288566243194	1.87716	0.115068063851176	0.424094856129895	0.374516266766144	IER3/PPP2CA	2
GO:0036035	osteoclast development	2/580	19/18805	0.105263157894737	3.41288566243194	1.87716	0.115068063851176	0.424094856129895	0.374516266766144	LTF/FOXP1	2
GO:0045820	negative regulation of glycolytic process	2/580	19/18805	0.105263157894737	3.41288566243194	1.87716	0.115068063851176	0.424094856129895	0.374516266766144	IER3/PPP2CA	2
GO:0048490	anterograde synaptic vesicle transport	2/580	19/18805	0.105263157894737	3.41288566243194	1.87716	0.115068063851176	0.424094856129895	0.374516266766144	BLOC1S1/BLOC1S6	2
GO:0055064	chloride ion homeostasis	2/580	19/18805	0.105263157894737	3.41288566243194	1.87716	0.115068063851176	0.424094856129895	0.374516266766144	STK39/SLC12A2	2
GO:0060263	regulation of respiratory burst	2/580	19/18805	0.105263157894737	3.41288566243194	1.87716	0.115068063851176	0.424094856129895	0.374516266766144	S100A9/INSR	2
GO:0060314	regulation of ryanodine-sensitive calcium-release channel activity	2/580	19/18805	0.105263157894737	3.41288566243194	1.87716	0.115068063851176	0.424094856129895	0.374516266766144	CALM2/FKBP1A	2
GO:0061158	3'-UTR-mediated mRNA destabilization	2/580	19/18805	0.105263157894737	3.41288566243194	1.87716	0.115068063851176	0.424094856129895	0.374516266766144	ZFP36/RBM24	2
GO:0061621	canonical glycolysis	2/580	19/18805	0.105263157894737	3.41288566243194	1.87716	0.115068063851176	0.424094856129895	0.374516266766144	FOXK2/ENO2	2
GO:0061718	glucose catabolic process to pyruvate	2/580	19/18805	0.105263157894737	3.41288566243194	1.87716	0.115068063851176	0.424094856129895	0.374516266766144	FOXK2/ENO2	2
GO:0070431	nucleotide-binding oligomerization domain containing 2 signaling pathway	2/580	19/18805	0.105263157894737	3.41288566243194	1.87716	0.115068063851176	0.424094856129895	0.374516266766144	HSPA1A/HSPA1B	2
GO:0098751	bone cell development	2/580	19/18805	0.105263157894737	3.41288566243194	1.87716	0.115068063851176	0.424094856129895	0.374516266766144	LTF/FOXP1	2
GO:0099514	synaptic vesicle cytoskeletal transport	2/580	19/18805	0.105263157894737	3.41288566243194	1.87716	0.115068063851176	0.424094856129895	0.374516266766144	BLOC1S1/BLOC1S6	2
GO:0099517	synaptic vesicle transport along microtubule	2/580	19/18805	0.105263157894737	3.41288566243194	1.87716	0.115068063851176	0.424094856129895	0.374516266766144	BLOC1S1/BLOC1S6	2
GO:0140131	positive regulation of lymphocyte chemotaxis	2/580	19/18805	0.105263157894737	3.41288566243194	1.87716	0.115068063851176	0.424094856129895	0.374516266766144	S100A7/STK39	2
GO:0170044	non-proteinogenic amino acid catabolic process	2/580	19/18805	0.105263157894737	3.41288566243194	1.87716	0.115068063851176	0.424094856129895	0.374516266766144	ABAT/KYNU	2
GO:1904044	response to aldosterone	2/580	19/18805	0.105263157894737	3.41288566243194	1.87716	0.115068063851176	0.424094856129895	0.374516266766144	IGF1R/STK39	2
GO:1905906	regulation of amyloid fibril formation	2/580	19/18805	0.105263157894737	3.41288566243194	1.87716	0.115068063851176	0.424094856129895	0.374516266766144	CLU/USP8	2
GO:2000811	negative regulation of anoikis	2/580	19/18805	0.105263157894737	3.41288566243194	1.87716	0.115068063851176	0.424094856129895	0.374516266766144	MCL1/CEACAM6	2
GO:0045860	positive regulation of protein kinase activity	10/580	210/18805	0.0476190476190476	1.54392446633826	1.41401982964959	0.116063258980998	0.427420810651844	0.37745340229842	CALM2/TRAF4/JTB/EFNA1/LTF/PIM1/PPP2CA/TNF/MAP2K3/INSR	10
GO:0021549	cerebellum development	6/580	108/18805	0.0555555555555556	1.80124521072797	1.48969276970522	0.117072168127828	0.430791915786664	0.380430410134568	OGDH/IGF1R/ABAT/NANOS1/LDB1/DAB1	6
GO:0050684	regulation of mRNA processing	7/580	133/18805	0.0526315789473684	1.70644283121597	1.45852129059029	0.117562382469158	0.431697535242952	0.381230158617666	HNRNPA1/CDK9/NUP98/RBM15B/TIA1/RBM24/LARP7	7
GO:0001570	vasculogenesis	5/580	84/18805	0.0595238095238095	1.92990558292282	1.52376967414761	0.117693098386184	0.431697535242952	0.381230158617666	JUNB/ADM/TIPARP/YAP1/TGFBR3	5
GO:0030593	neutrophil chemotaxis	5/580	84/18805	0.0595238095238095	1.92990558292282	1.52376967414761	0.117693098386184	0.431697535242952	0.381230158617666	PREX1/S100A8/CKLF/S100A9/CXCL8	5
GO:2000736	regulation of stem cell differentiation	5/580	84/18805	0.0595238095238095	1.92990558292282	1.52376967414761	0.117693098386184	0.431697535242952	0.381230158617666	CDK12/ZFP36/CHD4/RBM24/YAP1	5
GO:0003180	aortic valve morphogenesis	3/580	39/18805	0.0769230769230769	2.49403183023873	1.66614059994465	0.118192644298258	0.432496832630718	0.38193601455856	EFNA1/SNAI1/ROBO2	3
GO:0014741	negative regulation of muscle hypertrophy	3/580	39/18805	0.0769230769230769	2.49403183023873	1.66614059994465	0.118192644298258	0.432496832630718	0.38193601455856	IGFBP5/RGS2/FOXP1	3
GO:0033280	response to vitamin D	3/580	39/18805	0.0769230769230769	2.49403183023873	1.66614059994465	0.118192644298258	0.432496832630718	0.38193601455856	MED1/PIM1/GDAP1	3
GO:0000959	mitochondrial RNA metabolic process	4/580	61/18805	0.0655737704918033	2.12605992085924	1.57145022843808	0.118824729482774	0.433776171733074	0.383065793186189	GRSF1/TRMT5/POLR2A/TFB2M	4
GO:0001658	branching involved in ureteric bud morphogenesis	4/580	61/18805	0.0655737704918033	2.12605992085924	1.57145022843808	0.118824729482774	0.433776171733074	0.383065793186189	MYC/GPC3/HOXB7/NPNT	4
GO:0097300	programmed necrotic cell death	4/580	61/18805	0.0655737704918033	2.12605992085924	1.57145022843808	0.118824729482774	0.433776171733074	0.383065793186189	CYLD/RIPK1/PELI1/TNF	4
GO:0097696	cell surface receptor signaling pathway via STAT	8/580	159/18805	0.050314465408805	1.63131641726307	1.42612684496503	0.119324775222058	0.435256721653224	0.384373260185235	IL6ST/GADD45A/ELP2/SOCS3/SOCS1/LEPROT/DAB1/TNF	8
GO:1903844	regulation of cellular response to transforming growth factor beta stimulus	9/580	185/18805	0.0486486486486487	1.57730661696179	1.40769286946393	0.119523172408872	0.435635486778221	0.384707745969595	FKBP1A/GDF15/HSPA1A/CDKN1C/SAP30/TGFBR3/CDKN2B/NPNT/PMEPA1	9
GO:0060560	developmental growth involved in morphogenesis	11/580	238/18805	0.046218487394958	1.49851492321066	1.38070571652065	0.119666927916072	0.435814653683276	0.384865967460469	ESR1/MED1/EPB41L5/MESP1/ALCAM/CXCR4/YAP1/ITSN2/MAP1B/EXT1/AREG	11
GO:0019217	regulation of fatty acid metabolic process	6/580	109/18805	0.055045871559633	1.78472002530845	1.46574690004806	0.120875837577871	0.439495204530969	0.388116245418801	ELOVL5/GDF15/MID1IP1/EIF6/IRS1/MFSD2A	6
GO:0060761	negative regulation of response to cytokine stimulus	6/580	109/18805	0.055045871559633	1.78472002530845	1.46574690004806	0.120875837577871	0.439495204530969	0.388116245418801	IL6ST/KLF4/PYDC1/YTHDF3/CYLD/ECM1	6
GO:0009132	nucleoside diphosphate metabolic process	7/580	134/18805	0.0522388059701493	1.69370818322182	1.43764208237978	0.120963733306983	0.439495204530969	0.388116245418801	OGDH/IER3/EIF6/PPP2CA/FOXK2/ENO2/INSR	7
GO:0051054	positive regulation of DNA metabolic process	13/580	293/18805	0.0443686006825939	1.43853713075203	1.34964285444109	0.121777120955029	0.439829247472174	0.388411237243086	KLF4/MYC/HNRNPA1/SPIDR/IGF1R/NEK7/FAF1/HMCES/EXOSC6/ENDOG/SMARCC2/PELI1/TNF	13
GO:0043242	negative regulation of protein-containing complex disassembly	5/580	85/18805	0.0588235294117647	1.90720081135903	1.4954273532032	0.12208251974065	0.439829247472174	0.388411237243086	SPTAN1/ADD3/MID1IP1/MAP1B/TNF	5
GO:0051495	positive regulation of cytoskeleton organization	9/580	186/18805	0.0483870967741935	1.56882647385984	1.39079604323354	0.122397750405315	0.439829247472174	0.388411237243086	BAIAP2L1/ADD3/PYCARD/HSPA1A/NUP62/PFN2/MAP1B/HSPA1B/LIMCH1	9
GO:0031400	negative regulation of protein modification process	14/580	321/18805	0.043613707165109	1.41406166075841	1.33482676282341	0.123050580612499	0.439829247472174	0.388411237243086	CALM2/GADD45A/PYCARD/PREX1/HINT2/PPP1R15B/SOCS1/HSPA1A/CDKN1C/CDYL/BEX3/RGS2/GCLC/HSPA1B	14
GO:0002712	regulation of B cell mediated immunity	4/580	62/18805	0.0645161290322581	2.09176863181313	1.53607440912327	0.124114661200324	0.439829247472174	0.388411237243086	BCL6/HMCES/EXOSC6/TNF	4
GO:0002889	regulation of immunoglobulin mediated immune response	4/580	62/18805	0.0645161290322581	2.09176863181313	1.53607440912327	0.124114661200324	0.439829247472174	0.388411237243086	BCL6/HMCES/EXOSC6/TNF	4
GO:0003179	heart valve morphogenesis	4/580	62/18805	0.0645161290322581	2.09176863181313	1.53607440912327	0.124114661200324	0.439829247472174	0.388411237243086	EFNA1/SNAI1/ZFPM1/ROBO2	4
GO:0022029	telencephalon cell migration	4/580	62/18805	0.0645161290322581	2.09176863181313	1.53607440912327	0.124114661200324	0.439829247472174	0.388411237243086	OGDH/CXCR4/SOCS7/DAB1	4
GO:0032731	positive regulation of interleukin-1 beta production	4/580	62/18805	0.0645161290322581	2.09176863181313	1.53607440912327	0.124114661200324	0.439829247472174	0.388411237243086	PYDC1/PYCARD/NLRP2/TNF	4
GO:0046173	polyol biosynthetic process	4/580	62/18805	0.0645161290322581	2.09176863181313	1.53607440912327	0.124114661200324	0.439829247472174	0.388411237243086	SPTSSA/SPTSSB/IMPA2/SPTLC2	4
GO:0070228	regulation of lymphocyte apoptotic process	4/580	62/18805	0.0645161290322581	2.09176863181313	1.53607440912327	0.124114661200324	0.439829247472174	0.388411237243086	TSC22D3/EFNA1/BCL6/FOXP1	4
GO:0071168	protein localization to chromatin	4/580	62/18805	0.0645161290322581	2.09176863181313	1.53607440912327	0.124114661200324	0.439829247472174	0.388411237243086	ESR1/BRD2/CDK9/LEF1	4
GO:0099518	vesicle cytoskeletal trafficking	4/580	62/18805	0.0645161290322581	2.09176863181313	1.53607440912327	0.124114661200324	0.439829247472174	0.388411237243086	BLOC1S1/F8A1/BLOC1S6/HTT	4
GO:0070585	protein localization to mitochondrion	7/580	135/18805	0.0518518518518519	1.68116219667944	1.4169372321548	0.124415244323413	0.439829247472174	0.388411237243086	BAG3/NDUFA13/LEPROT/DNAJC15/IMMP2L/GDAP1/RHOU	7
GO:0007160	cell-matrix adhesion	11/580	240/18805	0.0458333333333333	1.48602729885057	1.35183646381033	0.124723611755377	0.439829247472174	0.388411237243086	JUP/BCL6/EPB41L5/ITGB6/SKAP1/CEACAM6/LDB1/SEMA3E/NPNT/PIK3R1/LIMCH1	11
GO:0048144	fibroblast proliferation	6/580	110/18805	0.0545454545454545	1.76849529780564	1.44204951198352	0.124739982035618	0.439829247472174	0.388411237243086	MYC/ESR1/PEX2/MYB/KAT2A/S100A6	6
GO:0001953	negative regulation of cell-matrix adhesion	3/580	40/18805	0.075	2.43168103448276	1.61698999488581	0.125012313012311	0.439829247472174	0.388411237243086	BCL6/SEMA3E/PIK3R1	3
GO:0031124	mRNA 3'-end processing	3/580	40/18805	0.075	2.43168103448276	1.61698999488581	0.125012313012311	0.439829247472174	0.388411237243086	CDK9/RPRD1B/LEO1	3
GO:0035886	vascular associated smooth muscle cell differentiation	3/580	40/18805	0.075	2.43168103448276	1.61698999488581	0.125012313012311	0.439829247472174	0.388411237243086	ADM/MESP1/NFATC4	3
GO:0045023	G0 to G1 transition	3/580	40/18805	0.075	2.43168103448276	1.61698999488581	0.125012313012311	0.439829247472174	0.388411237243086	MED1/SMARCC2/CDKN2B	3
GO:0045616	regulation of keratinocyte differentiation	3/580	40/18805	0.075	2.43168103448276	1.61698999488581	0.125012313012311	0.439829247472174	0.388411237243086	ZFP36/MED1/MSX2	3
GO:0051954	positive regulation of amine transport	3/580	40/18805	0.075	2.43168103448276	1.61698999488581	0.125012313012311	0.439829247472174	0.388411237243086	ARL6IP1/ABAT/SLC12A2	3
GO:0060074	synapse maturation	3/580	40/18805	0.075	2.43168103448276	1.61698999488581	0.125012313012311	0.439829247472174	0.388411237243086	NFATC4/DAB1/NEURL1	3
GO:0072337	modified amino acid transport	3/580	40/18805	0.075	2.43168103448276	1.61698999488581	0.125012313012311	0.439829247472174	0.388411237243086	SLC38A2/SLC19A2/SLC46A1	3
GO:1901223	negative regulation of non-canonical NF-kappaB signal transduction	3/580	40/18805	0.075	2.43168103448276	1.61698999488581	0.125012313012311	0.439829247472174	0.388411237243086	NDUFC2/CYLD/NLRP2	3
GO:1902110	positive regulation of mitochondrial membrane permeability involved in apoptotic process	3/580	40/18805	0.075	2.43168103448276	1.61698999488581	0.125012313012311	0.439829247472174	0.388411237243086	IER3/HSPA1A/GCLC	3
GO:1905898	positive regulation of response to endoplasmic reticulum stress	3/580	40/18805	0.075	2.43168103448276	1.61698999488581	0.125012313012311	0.439829247472174	0.388411237243086	PMAIP1/AGR2/PIK3R1	3
GO:0006541	glutamine metabolic process	2/580	20/18805	0.1	3.24224137931034	1.78976953206151	0.125351812878438	0.439829247472174	0.388411237243086	GLS/BLOC1S6	2
GO:0007096	regulation of exit from mitosis	2/580	20/18805	0.1	3.24224137931034	1.78976953206151	0.125351812878438	0.439829247472174	0.388411237243086	CDKN1C/MAD2L1BP	2
GO:0010950	positive regulation of endopeptidase activity	2/580	20/18805	0.1	3.24224137931034	1.78976953206151	0.125351812878438	0.439829247472174	0.388411237243086	EFNA1/PSENEN	2
GO:0031998	regulation of fatty acid beta-oxidation	2/580	20/18805	0.1	3.24224137931034	1.78976953206151	0.125351812878438	0.439829247472174	0.388411237243086	IRS1/MFSD2A	2
GO:0045655	regulation of monocyte differentiation	2/580	20/18805	0.1	3.24224137931034	1.78976953206151	0.125351812878438	0.439829247472174	0.388411237243086	MYC/FOXP1	2
GO:0051797	regulation of hair follicle development	2/580	20/18805	0.1	3.24224137931034	1.78976953206151	0.125351812878438	0.439829247472174	0.388411237243086	MSX2/TNF	2
GO:0060749	mammary gland alveolus development	2/580	20/18805	0.1	3.24224137931034	1.78976953206151	0.125351812878438	0.439829247472174	0.388411237243086	ESR1/AREG	2
GO:0061377	mammary gland lobule development	2/580	20/18805	0.1	3.24224137931034	1.78976953206151	0.125351812878438	0.439829247472174	0.388411237243086	ESR1/AREG	2
GO:0070875	positive regulation of glycogen metabolic process	2/580	20/18805	0.1	3.24224137931034	1.78976953206151	0.125351812878438	0.439829247472174	0.388411237243086	IRS1/INSR	2
GO:0071474	cellular hyperosmotic response	2/580	20/18805	0.1	3.24224137931034	1.78976953206151	0.125351812878438	0.439829247472174	0.388411237243086	EFHD1/STK39	2
GO:0071880	adenylate cyclase-activating adrenergic receptor signaling pathway	2/580	20/18805	0.1	3.24224137931034	1.78976953206151	0.125351812878438	0.439829247472174	0.388411237243086	CRTC3/ARRDC3	2
GO:1900221	regulation of amyloid-beta clearance	2/580	20/18805	0.1	3.24224137931034	1.78976953206151	0.125351812878438	0.439829247472174	0.388411237243086	CLU/TNF	2
GO:1900424	regulation of defense response to bacterium	2/580	20/18805	0.1	3.24224137931034	1.78976953206151	0.125351812878438	0.439829247472174	0.388411237243086	FOXP1/CYBA	2
GO:1901739	regulation of myoblast fusion	2/580	20/18805	0.1	3.24224137931034	1.78976953206151	0.125351812878438	0.439829247472174	0.388411237243086	GDF15/EHD1	2
GO:1990182	exosomal secretion	2/580	20/18805	0.1	3.24224137931034	1.78976953206151	0.125351812878438	0.439829247472174	0.388411237243086	ATP13A2/COPS5	2
GO:2000318	positive regulation of T-helper 17 type immune response	2/580	20/18805	0.1	3.24224137931034	1.78976953206151	0.125351812878438	0.439829247472174	0.388411237243086	BRD2/NFKBIZ	2
GO:2000434	regulation of protein neddylation	2/580	20/18805	0.1	3.24224137931034	1.78976953206151	0.125351812878438	0.439829247472174	0.388411237243086	DCUN1D5/COPS5	2
GO:2000786	positive regulation of autophagosome assembly	2/580	20/18805	0.1	3.24224137931034	1.78976953206151	0.125351812878438	0.439829247472174	0.388411237243086	PIP4K2B/SNX30	2
GO:0030111	regulation of Wnt signaling pathway	15/580	350/18805	0.0428571428571429	1.38953201970443	1.31227697739883	0.125925989540967	0.441507636084653	0.389893414704667	IGFBP4/IGFBP2/TPBG/JUP/AMFR/MESP1/CYLD/LEF1/WWOX/GPC3/NFATC4/NRARP/YAP1/CDK14/USP8	15
GO:0019058	viral life cycle	13/580	295/18805	0.0440677966101695	1.42878433664524	1.32419535609519	0.126356891935334	0.442681521784096	0.390930067904797	ITGB6/CSNK2B/MX1/HSPA1A/CXCR4/LTF/TMPRSS2/LGALS1/CXCL8/TNF/NUCKS1/HSPA1B/INSR	13
GO:0097061	dendritic spine organization	5/580	86/18805	0.0581395348837209	1.88502405773857	1.46746695146721	0.126547219995561	0.44301143048598	0.391221408800867	EFNA1/SLC30A1/IGF1R/TANC1/INSR	5
GO:0034219	carbohydrate transmembrane transport	7/580	136/18805	0.0514705882352941	1.66880070993915	1.39640373356541	0.127916433607173	0.447125196986531	0.394854257560678	PEA15/ZDHHC7/IRS1/GPC3/TNF/INSR/PIK3R1	7
GO:0050868	negative regulation of T cell activation	7/580	136/18805	0.0514705882352941	1.66880070993915	1.39640373356541	0.127916433607173	0.447125196986531	0.394854257560678	CEBPB/PRDX2/BCL6/SOCS1/LGALS1/PELI1/NRARP	7
GO:0048024	regulation of mRNA splicing, via spliceosome	6/580	111/18805	0.0540540540540541	1.75256290773532	1.41859533972079	0.128663841376197	0.44939675300996	0.396860258504449	HNRNPA1/NUP98/RBM15B/TIA1/RBM24/LARP7	6
GO:0010257	NADH dehydrogenase complex assembly	4/580	63/18805	0.0634920634920635	2.05856595511768	1.50136255440414	0.129502738963854	0.451300392138029	0.398541353686834	NDUFC2/NDUFA11/NDUFA13/NDUFB8	4
GO:0016447	somatic recombination of immunoglobulin gene segments	4/580	63/18805	0.0634920634920635	2.05856595511768	1.50136255440414	0.129502738963854	0.451300392138029	0.398541353686834	BCL6/HMCES/EXOSC6/NFKBIZ	4
GO:0032981	mitochondrial respiratory chain complex I assembly	4/580	63/18805	0.0634920634920635	2.05856595511768	1.50136255440414	0.129502738963854	0.451300392138029	0.398541353686834	NDUFC2/NDUFA11/NDUFA13/NDUFB8	4
GO:0016358	dendrite development	11/580	242/18805	0.0454545454545455	1.4737460815047	1.32322769187582	0.129897232093055	0.451991350644038	0.399151536046795	TPBG/EFNA1/SLC30A1/PREX1/NFATC4/DAB1/MAP1B/MFSD2A/NEURL1/PPP3CA/TNIK	11
GO:0065004	protein-DNA complex assembly	11/580	242/18805	0.0454545454545455	1.4737460815047	1.32322769187582	0.129897232093055	0.451991350644038	0.399151536046795	ESR1/MED1/BRD2/SMYD3/TSPYL2/MED14/BRF1/TAF9/NFKBIZ/TSPYL5/TAF1B	11
GO:0006979	response to oxidative stress	17/580	408/18805	0.0416666666666667	1.35093390804598	1.27846033902957	0.130142136679513	0.452326231536605	0.399447267862173	PRDX2/S100A7/PCGF2/ATP13A2/PEX2/PPP1R15B/HSPA1A/MYB/KLF2/RIPK1/FOXP1/GCLC/ENDOG/PXDNL/PDLIM1/HSPA1B/AREG	17
GO:0021700	developmental maturation	15/580	352/18805	0.0426136363636364	1.38163695141066	1.28941764312454	0.130189837859244	0.452326231536605	0.399447267862173	PGR/TRPC4AP/RND1/LTF/KLF2/CDKN1C/MSX2/TDRKH/NFATC4/BLOC1S6/DAB1/MAP1B/FARP2/EXT1/NEURL1	15
GO:0005977	glycogen metabolic process	5/580	87/18805	0.0574712643678161	1.86335711454618	1.43987810088691	0.131085876325285	0.454069648293674	0.400986871386803	IL6ST/IRS1/PPP1CB/INSR/AGL	5
GO:0120193	tight junction organization	5/580	87/18805	0.0574712643678161	1.86335711454618	1.43987810088691	0.131085876325285	0.454069648293674	0.400986871386803	SNAI1/RAB13/CLDN7/TNF/EXT1	5
GO:1900542	regulation of purine nucleotide metabolic process	5/580	87/18805	0.0574712643678161	1.86335711454618	1.43987810088691	0.131085876325285	0.454069648293674	0.400986871386803	NDUFC2/IER3/EIF6/PPP2CA/INSR	5
GO:1901379	regulation of potassium ion transmembrane transport	5/580	87/18805	0.0574712643678161	1.86335711454618	1.43987810088691	0.131085876325285	0.454069648293674	0.400986871386803	KCNE4/STK39/VAMP2/KCNC2/LRRC26	5
GO:0042327	positive regulation of phosphorylation	18/580	437/18805	0.0411899313501144	1.33547699834293	1.26583727807623	0.131641328602652	0.454656457264042	0.40150507975861	CALM2/TRAF4/JTB/EFNA1/CDK2AP1/LTF/AKTIP/RIPK1/PIM1/PPP2CA/PFN2/RAF1/TNF/MAP2K3/TNIK/AREG/INSR/LIMCH1	18
GO:0060326	cell chemotaxis	14/580	325/18805	0.0430769230769231	1.39665782493369	1.28680302361279	0.131927984145479	0.454656457264042	0.40150507975861	TPBG/S100A7/DDT/RAB13/PREX1/S100A8/CXCR4/STK39/CKLF/S100A9/LEF1/CXCL8/EGR3/SLC12A2	14
GO:0003203	endocardial cushion morphogenesis	3/580	41/18805	0.0731707317073171	2.37237174095879	1.56930129278014	0.131970178835931	0.454656457264042	0.40150507975861	SNAI1/MSX2/ROBO2	3
GO:0035337	fatty-acyl-CoA metabolic process	3/580	41/18805	0.0731707317073171	2.37237174095879	1.56930129278014	0.131970178835931	0.454656457264042	0.40150507975861	ELOVL5/SLC27A2/FAR1	3
GO:0042307	positive regulation of protein import into nucleus	3/580	41/18805	0.0731707317073171	2.37237174095879	1.56930129278014	0.131970178835931	0.454656457264042	0.40150507975861	JUP/BAG3/PIK3R1	3
GO:0060392	negative regulation of SMAD protein signal transduction	3/580	41/18805	0.0731707317073171	2.37237174095879	1.56930129278014	0.131970178835931	0.454656457264042	0.40150507975861	GDF15/TGFBR3/PMEPA1	3
GO:0062098	regulation of programmed necrotic cell death	3/580	41/18805	0.0731707317073171	2.37237174095879	1.56930129278014	0.131970178835931	0.454656457264042	0.40150507975861	CYLD/RIPK1/PELI1	3
GO:0008277	regulation of G protein-coupled receptor signaling pathway	8/580	163/18805	0.049079754601227	1.59128411254495	1.35253686093422	0.132044788326305	0.454656457264042	0.40150507975861	CRTC3/RAMP1/ARRDC3/ADM/RGS2/ZDHHC7/CXCL8/PPP3CA	8
GO:2001243	negative regulation of intrinsic apoptotic signaling pathway	6/580	112/18805	0.0535714285714286	1.73691502463054	1.39537927772876	0.132646623042038	0.456387596978843	0.403033841482236	SNAI1/HSPA1A/CLU/TAF9/RTKN2/MUC1	6
GO:0048736	appendage development	9/580	190/18805	0.0473684210526316	1.53579854809437	1.32419566610769	0.134264402726374	0.458149404812758	0.404589686084405	MED1/TFAP2B/LEF1/MSX2/GPC3/KAT2A/GNA12/SLC39A1/EXT1	9
GO:0060173	limb development	9/580	190/18805	0.0473684210526316	1.53579854809437	1.32419566610769	0.134264402726374	0.458149404812758	0.404589686084405	MED1/TFAP2B/LEF1/MSX2/GPC3/KAT2A/GNA12/SLC39A1/EXT1	9
GO:0044843	cell cycle G1/S phase transition	12/580	271/18805	0.044280442804428	1.43567883954702	1.2887595094852	0.134535467935694	0.458149404812758	0.404589686084405	AMBRA1/KLF4/MYC/RBL2/TMEM14B/PLK2/PPP2CA/SMARCC2/CCNO/RHOU/CDKN2B/PPP3CA	12
GO:0048565	digestive tract development	7/580	138/18805	0.0507246376811594	1.6446151924038	1.35583913682129	0.135065803395812	0.458149404812758	0.404589686084405	IL6ST/EPB41L5/AGR2/CXCL8/YAP1/TNF/EXT1	7
GO:0006140	regulation of nucleotide metabolic process	5/580	88/18805	0.0568181818181818	1.84218260188088	1.41265083593995	0.135697120469987	0.458149404812758	0.404589686084405	NDUFC2/IER3/EIF6/PPP2CA/INSR	5
GO:0000028	ribosomal small subunit assembly	2/580	21/18805	0.0952380952380952	3.08784893267652	1.70773322907919	0.135843734962932	0.458149404812758	0.404589686084405	ERAL1/RPS28	2
GO:0002902	regulation of B cell apoptotic process	2/580	21/18805	0.0952380952380952	3.08784893267652	1.70773322907919	0.135843734962932	0.458149404812758	0.404589686084405	BCL6/FOXP1	2
GO:0006085	acetyl-CoA biosynthetic process	2/580	21/18805	0.0952380952380952	3.08784893267652	1.70773322907919	0.135843734962932	0.458149404812758	0.404589686084405	ACLY/MPC2	2
GO:0006700	C21-steroid hormone biosynthetic process	2/580	21/18805	0.0952380952380952	3.08784893267652	1.70773322907919	0.135843734962932	0.458149404812758	0.404589686084405	STARD3/ADM	2
GO:0007398	ectoderm development	2/580	21/18805	0.0952380952380952	3.08784893267652	1.70773322907919	0.135843734962932	0.458149404812758	0.404589686084405	EPB41L5/ETS2	2
GO:0009048	dosage compensation by inactivation of X chromosome	2/580	21/18805	0.0952380952380952	3.08784893267652	1.70773322907919	0.135843734962932	0.458149404812758	0.404589686084405	CDYL/RBM15B	2
GO:0010829	negative regulation of D-glucose transmembrane transport	2/580	21/18805	0.0952380952380952	3.08784893267652	1.70773322907919	0.135843734962932	0.458149404812758	0.404589686084405	PEA15/TNF	2
GO:0035461	vitamin transmembrane transport	2/580	21/18805	0.0952380952380952	3.08784893267652	1.70773322907919	0.135843734962932	0.458149404812758	0.404589686084405	SLC19A2/SLC46A1	2
GO:0036498	IRE1-mediated unfolded protein response	2/580	21/18805	0.0952380952380952	3.08784893267652	1.70773322907919	0.135843734962932	0.458149404812758	0.404589686084405	AGR2/COPS5	2
GO:0038166	angiotensin-activated signaling pathway	2/580	21/18805	0.0952380952380952	3.08784893267652	1.70773322907919	0.135843734962932	0.458149404812758	0.404589686084405	CA2/PPP3CA	2
GO:0042359	vitamin D metabolic process	2/580	21/18805	0.0952380952380952	3.08784893267652	1.70773322907919	0.135843734962932	0.458149404812758	0.404589686084405	SNAI1/TNF	2
GO:0045623	negative regulation of T-helper cell differentiation	2/580	21/18805	0.0952380952380952	3.08784893267652	1.70773322907919	0.135843734962932	0.458149404812758	0.404589686084405	BCL6/LGALS1	2
GO:0046596	regulation of viral entry into host cell	2/580	21/18805	0.0952380952380952	3.08784893267652	1.70773322907919	0.135843734962932	0.458149404812758	0.404589686084405	TMPRSS2/LGALS1	2
GO:0055081	monoatomic anion homeostasis	2/580	21/18805	0.0952380952380952	3.08784893267652	1.70773322907919	0.135843734962932	0.458149404812758	0.404589686084405	STK39/SLC12A2	2
GO:0061050	regulation of cell growth involved in cardiac muscle cell development	2/580	21/18805	0.0952380952380952	3.08784893267652	1.70773322907919	0.135843734962932	0.458149404812758	0.404589686084405	RGS2/FOXP1	2
GO:0061620	glycolytic process through glucose-6-phosphate	2/580	21/18805	0.0952380952380952	3.08784893267652	1.70773322907919	0.135843734962932	0.458149404812758	0.404589686084405	FOXK2/ENO2	2
GO:0071514	genomic imprinting	2/580	21/18805	0.0952380952380952	3.08784893267652	1.70773322907919	0.135843734962932	0.458149404812758	0.404589686084405	CDKN1C/KDM1B	2
GO:0071800	podosome assembly	2/580	21/18805	0.0952380952380952	3.08784893267652	1.70773322907919	0.135843734962932	0.458149404812758	0.404589686084405	TNF/FARP2	2
GO:0097468	programmed cell death in response to reactive oxygen species	2/580	21/18805	0.0952380952380952	3.08784893267652	1.70773322907919	0.135843734962932	0.458149404812758	0.404589686084405	FOXP1/ENDOG	2
GO:0097734	extracellular exosome biogenesis	2/580	21/18805	0.0952380952380952	3.08784893267652	1.70773322907919	0.135843734962932	0.458149404812758	0.404589686084405	ATP13A2/COPS5	2
GO:0106070	regulation of adenylate cyclase-activating G protein-coupled receptor signaling pathway	2/580	21/18805	0.0952380952380952	3.08784893267652	1.70773322907919	0.135843734962932	0.458149404812758	0.404589686084405	CRTC3/ARRDC3	2
GO:1900102	negative regulation of endoplasmic reticulum unfolded protein response	2/580	21/18805	0.0952380952380952	3.08784893267652	1.70773322907919	0.135843734962932	0.458149404812758	0.404589686084405	PPP1R15A/PPP1R15B	2
GO:0042116	macrophage activation	6/580	113/18805	0.0530973451327434	1.72154409520903	1.37239637444346	0.136687503131781	0.46065788363432	0.40680491248938	CRTC3/CLU/STK39/FOXP1/TNF/MYO18A	6
GO:0001894	tissue homeostasis	12/580	272/18805	0.0441176470588235	1.43040060851927	1.27552746788692	0.137070166767221	0.461272650326214	0.407347810199768	TFF3/TFF1/APBB2/STK39/NANOS1/LDB1/YAP1/MFSD2A/NFKBIZ/EXT1/SLC12A2/NCDN	12
GO:0060249	anatomical structure homeostasis	12/580	272/18805	0.0441176470588235	1.43040060851927	1.27552746788692	0.137070166767221	0.461272650326214	0.407347810199768	TFF3/TFF1/APBB2/STK39/NANOS1/LDB1/YAP1/MFSD2A/NFKBIZ/EXT1/SLC12A2/NCDN	12
GO:0006865	amino acid transport	8/580	165/18805	0.0484848484848485	1.57199582027168	1.31648896439773	0.138655508233574	0.463231448795274	0.409077616348973	ARL6IP1/SLC38A2/ABAT/SERINC5/RGS2/SLC43A1/TNF/SLC12A2	8
GO:0050768	negative regulation of neurogenesis	7/580	139/18805	0.0503597122302158	1.63278342842967	1.33580238979531	0.138712905810078	0.463231448795274	0.409077616348973	CERS2/NFATC4/DAB1/TNF/CDKN2B/PPP3CA/HOOK3	7
GO:0051592	response to calcium ion	7/580	139/18805	0.0503597122302158	1.63278342842967	1.33580238979531	0.138712905810078	0.463231448795274	0.409077616348973	CALM2/PDCD6/JUND/FOSB/JUNB/ENDOG/PPP3CA	7
GO:0000266	mitochondrial fission	3/580	42/18805	0.0714285714285714	2.31588669950739	1.52299105542642	0.139059929169495	0.463231448795274	0.409077616348973	MTFR1/DDHD2/GDAP1	3
GO:0017004	cytochrome complex assembly	3/580	42/18805	0.0714285714285714	2.31588669950739	1.52299105542642	0.139059929169495	0.463231448795274	0.409077616348973	COX14/PET100/CYBA	3
GO:0019933	cAMP-mediated signaling	3/580	42/18805	0.0714285714285714	2.31588669950739	1.52299105542642	0.139059929169495	0.463231448795274	0.409077616348973	ADM/CAP2/PDE7A	3
GO:0030851	granulocyte differentiation	3/580	42/18805	0.0714285714285714	2.31588669950739	1.52299105542642	0.139059929169495	0.463231448795274	0.409077616348973	LEF1/ZFPM1/DHRS7B	3
GO:0035330	regulation of hippo signaling	3/580	42/18805	0.0714285714285714	2.31588669950739	1.52299105542642	0.139059929169495	0.463231448795274	0.409077616348973	ARRDC3/PPP2CA/MAP2K3	3
GO:0051154	negative regulation of striated muscle cell differentiation	3/580	42/18805	0.0714285714285714	2.31588669950739	1.52299105542642	0.139059929169495	0.463231448795274	0.409077616348973	FRS2/RGS2/FOXP1	3
GO:0071354	cellular response to interleukin-6	3/580	42/18805	0.0714285714285714	2.31588669950739	1.52299105542642	0.139059929169495	0.463231448795274	0.409077616348973	IL6ST/RIPK1/YAP1	3
GO:1902686	mitochondrial outer membrane permeabilization involved in programmed cell death	3/580	42/18805	0.0714285714285714	2.31588669950739	1.52299105542642	0.139059929169495	0.463231448795274	0.409077616348973	IER3/HSPA1A/GCLC	3
GO:2000008	regulation of protein localization to cell surface	3/580	42/18805	0.0714285714285714	2.31588669950739	1.52299105542642	0.139059929169495	0.463231448795274	0.409077616348973	LEPROT/ASTN2/TNF	3
GO:2000403	positive regulation of lymphocyte migration	3/580	42/18805	0.0714285714285714	2.31588669950739	1.52299105542642	0.139059929169495	0.463231448795274	0.409077616348973	S100A7/PYCARD/STK39	3
GO:2001259	positive regulation of cation channel activity	3/580	42/18805	0.0714285714285714	2.31588669950739	1.52299105542642	0.139059929169495	0.463231448795274	0.409077616348973	CALM2/LRRC26/HTT	3
GO:0032386	regulation of intracellular transport	12/580	273/18805	0.043956043956044	1.4251610458507	1.26234770262588	0.139630734433571	0.464461222769286	0.410163624233898	OAZ1/JUP/BAG3/ATP13A2/IER3/TMEM30B/VAMP2/EHD1/NEFH/FRAT2/MAP1B/PIK3R1	12
GO:0071216	cellular response to biotic stimulus	12/580	273/18805	0.043956043956044	1.4251610458507	1.26234770262588	0.139630734433571	0.464461222769286	0.410163624233898	PRDX2/ZFP36/LDOC1/PYCARD/PPP1R15B/LTF/PRPF8/CXCL8/NFKBIZ/TNF/EIF2AK3/MAP2K3	12
GO:0022406	membrane docking	5/580	89/18805	0.0561797752808989	1.82148392096087	1.38577557353475	0.140379541106206	0.465210417930708	0.410825235123254	YKT6/EXOC2/EXOC4/PACS2/BLOC1S6	5
GO:0036465	synaptic vesicle recycling	5/580	89/18805	0.0561797752808989	1.82148392096087	1.38577557353475	0.140379541106206	0.465210417930708	0.410825235123254	ARPC3/MX1/AMPH/VAMP2/ITSN2	5
GO:0044042	glucan metabolic process	5/580	89/18805	0.0561797752808989	1.82148392096087	1.38577557353475	0.140379541106206	0.465210417930708	0.410825235123254	IL6ST/IRS1/PPP1CB/INSR/AGL	5
GO:0001837	epithelial to mesenchymal transition	9/580	192/18805	0.046875	1.51980064655172	1.29147079794773	0.140415118661692	0.465210417930708	0.410825235123254	PDCD6/EFNA1/SNAI1/EPB41L5/LEF1/PPP2CA/MSX2/POFUT2/TGFBR3	9
GO:0021885	forebrain cell migration	4/580	65/18805	0.0615384615384615	1.99522546419098	1.43383347059181	0.140562817833633	0.465210417930708	0.410825235123254	OGDH/CXCR4/SOCS7/DAB1	4
GO:0048814	regulation of dendrite morphogenesis	4/580	65/18805	0.0615384615384615	1.99522546419098	1.43383347059181	0.140562817833633	0.465210417930708	0.410825235123254	SLC30A1/NFATC4/PPP3CA/TNIK	4
GO:1903078	positive regulation of protein localization to plasma membrane	4/580	65/18805	0.0615384615384615	1.99522546419098	1.43383347059181	0.140562817833633	0.465210417930708	0.410825235123254	AGR2/ZDHHC5/TNF/PIK3R1	4
GO:0034440	lipid oxidation	6/580	114/18805	0.0526315789473684	1.70644283121597	1.34964182627655	0.140785627501512	0.465279329913534	0.410886090986441	GDF15/PEX2/IRS1/SLC27A2/MFSD2A/ETFB	6
GO:0071902	positive regulation of protein serine/threonine kinase activity	6/580	114/18805	0.0526315789473684	1.70644283121597	1.34964182627655	0.140785627501512	0.465279329913534	0.410886090986441	CALM2/LTF/PIM1/PPP2CA/TNF/INSR	6
GO:0090092	regulation of transmembrane receptor protein serine/threonine kinase signaling pathway	14/580	329/18805	0.0425531914893617	1.37967718268525	1.23940664432765	0.141157149961771	0.466172752597763	0.411675068554797	FKBP1A/GDF15/CSNK2B/TFAP2B/HSPA1A/CDKN1C/MSX2/GPC3/SAP30/IGSF1/TGFBR3/CDKN2B/NPNT/PMEPA1	14
GO:0009314	response to radiation	18/580	442/18805	0.0407239819004525	1.32036979247933	1.21589543245459	0.141542217379245	0.467109595606148	0.412502390416817	RPL26/MYC/GADD45A/SPIDR/GNGT1/ITGB6/DDHD2/KCNC2/TANC1/RHBDD1/NFATC4/PPP1CB/YAP1/TNF/EXT1/NUCKS1/TSPYL5/PIK3R1	18
GO:0035051	cardiocyte differentiation	8/580	166/18805	0.0481927710843374	1.5625259659327	1.29864564505085	0.142022219904695	0.468358172584773	0.413605003150846	FRS2/SORBS2/MESP1/FHL2/RGS2/FOXP1/KAT2A/TGFBR3	8
GO:0032388	positive regulation of intracellular transport	7/580	140/18805	0.05	1.62112068965517	1.31592569214471	0.142407531450603	0.469292916590077	0.414430471392651	OAZ1/JUP/BAG3/TMEM30B/VAMP2/EHD1/PIK3R1	7
GO:0036293	response to decreased oxygen levels	14/580	330/18805	0.0424242424242424	1.37549634273772	1.2276535029495	0.143518757728309	0.471714513842625	0.416568973073412	PMAIP1/MYC/GNGT1/ADM/ABAT/MYB/CXCR4/PLAT/ENDOG/HILPDA/TNF/TGFBR3/PDLIM1/ITPR2	14
GO:0005976	polysaccharide metabolic process	6/580	115/18805	0.0521739130434783	1.69160419790105	1.32711097190793	0.144940112876425	0.471714513842625	0.416568973073412	IL6ST/IRS1/PPP1CB/EXT1/INSR/AGL	6
GO:0048145	regulation of fibroblast proliferation	5/580	90/18805	0.0555555555555556	1.80124521072797	1.35924309413055	0.145131686207463	0.471714513842625	0.416568973073412	MYC/ESR1/PEX2/MYB/S100A6	5
GO:0016311	dephosphorylation	8/580	167/18805	0.0479041916167665	1.55316952302292	1.28092049933643	0.145429284162169	0.471714513842625	0.416568973073412	DUSP5/PPP2CA/OCRL/PPP1CB/DUSP2/PPP3CA/DUSP6/DUSP4	8
GO:1904951	positive regulation of establishment of protein localization	14/580	331/18805	0.0422960725075529	1.37134076466299	1.21593820465237	0.145901896517107	0.471714513842625	0.416568973073412	OAZ1/JUP/BAG3/ATP13A2/MPC2/ABAT/TMEM30B/LEPROT/VAMP2/IER3IP1/TNF/RHOU/MYO18A/PIK3R1	14
GO:0033135	regulation of peptidyl-serine phosphorylation	4/580	66/18805	0.0606060606060606	1.9649947753396	1.40097076838485	0.146229422106597	0.471714513842625	0.416568973073412	GADD45A/PFN2/RAF1/TNF	4
GO:0043470	regulation of carbohydrate catabolic process	4/580	66/18805	0.0606060606060606	1.9649947753396	1.40097076838485	0.146229422106597	0.471714513842625	0.416568973073412	IER3/EIF6/PPP2CA/INSR	4
GO:0052548	regulation of endopeptidase activity	4/580	66/18805	0.0606060606060606	1.9649947753396	1.40097076838485	0.146229422106597	0.471714513842625	0.416568973073412	EFNA1/ATP13A2/PSENEN/TIMP3	4
GO:0071384	cellular response to corticosteroid stimulus	4/580	66/18805	0.0606060606060606	1.9649947753396	1.40097076838485	0.146229422106597	0.471714513842625	0.416568973073412	ZFP36/IGF1R/SMYD3/USP8	4
GO:1901224	positive regulation of non-canonical NF-kappaB signal transduction	4/580	66/18805	0.0606060606060606	1.9649947753396	1.40097076838485	0.146229422106597	0.471714513842625	0.416568973073412	PYCARD/RIPK1/TNF/RTKN2	4
GO:1905330	regulation of morphogenesis of an epithelium	4/580	66/18805	0.0606060606060606	1.9649947753396	1.40097076838485	0.146229422106597	0.471714513842625	0.416568973073412	ESR1/FOXP1/HOXB7/TNF	4
GO:0001709	cell fate determination	3/580	43/18805	0.0697674418604651	2.26202886928629	1.47798253171014	0.146275241728494	0.471714513842625	0.416568973073412	KLF4/MCL1/MESP1	3
GO:0002714	positive regulation of B cell mediated immunity	3/580	43/18805	0.0697674418604651	2.26202886928629	1.47798253171014	0.146275241728494	0.471714513842625	0.416568973073412	HMCES/EXOSC6/TNF	3
GO:0002891	positive regulation of immunoglobulin mediated immune response	3/580	43/18805	0.0697674418604651	2.26202886928629	1.47798253171014	0.146275241728494	0.471714513842625	0.416568973073412	HMCES/EXOSC6/TNF	3
GO:0007099	centriole replication	3/580	43/18805	0.0697674418604651	2.26202886928629	1.47798253171014	0.146275241728494	0.471714513842625	0.416568973073412	PLK2/NUP62/KAT2A	3
GO:0007595	lactation	3/580	43/18805	0.0697674418604651	2.26202886928629	1.47798253171014	0.146275241728494	0.471714513842625	0.416568973073412	MED1/NME1/NEURL1	3
GO:0032570	response to progesterone	3/580	43/18805	0.0697674418604651	2.26202886928629	1.47798253171014	0.146275241728494	0.471714513842625	0.416568973073412	FOSB/IGF1R/YAP1	3
GO:0043094	metabolic compound salvage	3/580	43/18805	0.0697674418604651	2.26202886928629	1.47798253171014	0.146275241728494	0.471714513842625	0.416568973073412	MRI1/UCK2/DCK	3
GO:0046717	acid secretion	3/580	43/18805	0.0697674418604651	2.26202886928629	1.47798253171014	0.146275241728494	0.471714513842625	0.416568973073412	ABAT/PTGER3/TNF	3
GO:0060412	ventricular septum morphogenesis	3/580	43/18805	0.0697674418604651	2.26202886928629	1.47798253171014	0.146275241728494	0.471714513842625	0.416568973073412	ZFPM1/ROBO2/TGFBR3	3
GO:0150052	regulation of postsynapse assembly	3/580	43/18805	0.0697674418604651	2.26202886928629	1.47798253171014	0.146275241728494	0.471714513842625	0.416568973073412	NEDD8/MAP1B/NEURL1	3
GO:1900225	regulation of NLRP3 inflammasome complex assembly	3/580	43/18805	0.0697674418604651	2.26202886928629	1.47798253171014	0.146275241728494	0.471714513842625	0.416568973073412	NEK7/ZDHHC5/PPP2CA	3
GO:0002089	lens morphogenesis in camera-type eye	2/580	22/18805	0.0909090909090909	2.9474921630094	1.63045917646787	0.146521265315563	0.471714513842625	0.416568973073412	HIPK1/BCAR3	2
GO:0021554	optic nerve development	2/580	22/18805	0.0909090909090909	2.9474921630094	1.63045917646787	0.146521265315563	0.471714513842625	0.416568973073412	KCNC2/EXT1	2
GO:0021756	striatum development	2/580	22/18805	0.0909090909090909	2.9474921630094	1.63045917646787	0.146521265315563	0.471714513842625	0.416568973073412	OGDH/FOXP1	2
GO:0035809	regulation of urine volume	2/580	22/18805	0.0909090909090909	2.9474921630094	1.63045917646787	0.146521265315563	0.471714513842625	0.416568973073412	MLLT6/ADM	2
GO:0043555	regulation of translation in response to stress	2/580	22/18805	0.0909090909090909	2.9474921630094	1.63045917646787	0.146521265315563	0.471714513842625	0.416568973073412	PPP1R15A/EIF2AK3	2
GO:0045056	transcytosis	2/580	22/18805	0.0909090909090909	2.9474921630094	1.63045917646787	0.146521265315563	0.471714513842625	0.416568973073412	IGF1R/MFSD2A	2
GO:0060546	negative regulation of necroptotic process	2/580	22/18805	0.0909090909090909	2.9474921630094	1.63045917646787	0.146521265315563	0.471714513842625	0.416568973073412	RIPK1/PELI1	2
GO:0072111	cell proliferation involved in kidney development	2/580	22/18805	0.0909090909090909	2.9474921630094	1.63045917646787	0.146521265315563	0.471714513842625	0.416568973073412	MYC/GPC3	2
GO:1901017	negative regulation of potassium ion transmembrane transporter activity	2/580	22/18805	0.0909090909090909	2.9474921630094	1.63045917646787	0.146521265315563	0.471714513842625	0.416568973073412	KCNE4/STK39	2
GO:1905146	lysosomal protein catabolic process	2/580	22/18805	0.0909090909090909	2.9474921630094	1.63045917646787	0.146521265315563	0.471714513842625	0.416568973073412	ATP13A2/USP8	2
GO:2000725	regulation of cardiac muscle cell differentiation	2/580	22/18805	0.0909090909090909	2.9474921630094	1.63045917646787	0.146521265315563	0.471714513842625	0.416568973073412	FRS2/KAT2A	2
GO:0006941	striated muscle contraction	9/580	194/18805	0.0463917525773196	1.50413259864913	1.25911715482835	0.146707702957413	0.471984907489388	0.416807756491034	CALM2/JUP/FKBP1A/KCNE4/CXCR4/RGS2/TNF/MAP2K3/TNNT1	9
GO:0000422	autophagy of mitochondrion	6/580	116/18805	0.0517241379310345	1.67702140309156	1.30479928684669	0.149150047971016	0.47883921324214	0.422860763182085	AMBRA1/ATP13A2/MAP1LC3B2/LRBA/SNX30/HTT	6
GO:0002062	chondrocyte differentiation	6/580	116/18805	0.0517241379310345	1.67702140309156	1.30479928684669	0.149150047971016	0.47883921324214	0.422860763182085	MSX2/MEX3C/ECM1/EIF2AK3/EXT1/BMPR1B	6
GO:0070555	response to interleukin-1	6/580	116/18805	0.0517241379310345	1.67702140309156	1.30479928684669	0.149150047971016	0.47883921324214	0.422860763182085	PYDC1/PYCARD/KLF2/GCLC/TAF9/CXCL8	6
GO:0010565	regulation of ketone metabolic process	7/580	142/18805	0.0492957746478873	1.59828800388538	1.27664188421255	0.149936960944712	0.479742475872858	0.423658430363085	ELOVL5/GDF15/ADM/MID1IP1/EIF6/IRS1/MFSD2A	7
GO:0034644	cellular response to UV	5/580	91/18805	0.0549450549450549	1.78145130731338	1.33304452399031	0.149952065391125	0.479742475872858	0.423658430363085	RPL26/MYC/RHBDD1/NFATC4/PIK3R1	5
GO:0048708	astrocyte differentiation	5/580	91/18805	0.0549450549450549	1.78145130731338	1.33304452399031	0.149952065391125	0.479742475872858	0.423658430363085	IL6ST/S100A8/S100A9/DAB1/TNF	5
GO:0051591	response to cAMP	5/580	91/18805	0.0549450549450549	1.78145130731338	1.33304452399031	0.149952065391125	0.479742475872858	0.423658430363085	IGFBP5/FOSB/CRTC3/AREG/ITPR2	5
GO:0140029	exocytic process	5/580	91/18805	0.0549450549450549	1.78145130731338	1.33304452399031	0.149952065391125	0.479742475872858	0.423658430363085	NAPA/YKT6/EXOC2/EXOC4/BLOC1S6	5
GO:0060828	regulation of canonical Wnt signaling pathway	12/580	277/18805	0.0433212996389892	1.40458110295033	1.21014262124609	0.150128803347813	0.47997459890588	0.423863417173232	IGFBP4/IGFBP2/TPBG/JUP/AMFR/MESP1/CYLD/GPC3/NRARP/YAP1/CDK14/USP8	12
GO:0031589	cell-substrate adhesion	15/580	361/18805	0.0415512465373961	1.34719170885471	1.18823061847823	0.150379688757518	0.480443291335567	0.424277317357332	JUP/EFNA1/BCL6/EPB41L5/AGR2/PREX1/ITGB6/FBLN2/SKAP1/CEACAM6/LDB1/SEMA3E/NPNT/PIK3R1/LIMCH1	15
GO:0050994	regulation of lipid catabolic process	4/580	67/18805	0.0597014925373134	1.93566649511065	1.36868091630601	0.151983390110727	0.483554888287374	0.42702515468011	CRTC3/IRS1/MFSD2A/TNF	4
GO:0051123	RNA polymerase II preinitiation complex assembly	4/580	67/18805	0.0597014925373134	1.93566649511065	1.36868091630601	0.151983390110727	0.483554888287374	0.42702515468011	ESR1/MED1/MED14/TAF9	4
GO:0060042	retina morphogenesis in camera-type eye	4/580	67/18805	0.0597014925373134	1.93566649511065	1.36868091630601	0.151983390110727	0.483554888287374	0.42702515468011	TFAP2B/HIPK1/SAMD11/MFSD2A	4
GO:0070301	cellular response to hydrogen peroxide	4/580	67/18805	0.0597014925373134	1.93566649511065	1.36868091630601	0.151983390110727	0.483554888287374	0.42702515468011	PCGF2/MYB/KLF2/RIPK1	4
GO:0071300	cellular response to retinoic acid	4/580	67/18805	0.0597014925373134	1.93566649511065	1.36868091630601	0.151983390110727	0.483554888287374	0.42702515468011	NDUFA13/MYB/YAP1/TNF	4
GO:2000630	positive regulation of miRNA metabolic process	4/580	67/18805	0.0597014925373134	1.93566649511065	1.36868091630601	0.151983390110727	0.483554888287374	0.42702515468011	KLF4/MYC/MYB/TNF	4
GO:0010639	negative regulation of organelle organization	15/580	362/18805	0.0414364640883978	1.3434701847971	1.17715295031575	0.152722671267715	0.48438079764206	0.427754511529723	HNRNPA1/SPTAN1/ADD3/IER3/TEX14/MID1IP1/HSPA1A/CLU/MAD2L1BP/GCLC/PFN2/KAT2A/YAP1/MAP1B/PIK3R1	15
GO:0033674	positive regulation of kinase activity	10/580	223/18805	0.0448430493273543	1.45391990103603	1.21644023646467	0.152815807922601	0.48438079764206	0.427754511529723	CALM2/TRAF4/JTB/EFNA1/LTF/PIM1/PPP2CA/TNF/MAP2K3/INSR	10
GO:0003018	vascular process in circulatory system	12/580	278/18805	0.0431654676258993	1.39952865293972	1.19721769670039	0.152816491630544	0.48438079764206	0.427754511529723	SLC38A2/ADD3/ADM/KLF2/RGS2/GCLC/BLOC1S6/MFSD2A/TNF/EXT1/INSR/SLC12A2	12
GO:0006766	vitamin metabolic process	6/580	117/18805	0.0512820512820513	1.66268788682582	1.28270237824547	0.153414494616014	0.48438079764206	0.427754511529723	SNAI1/VKORC1/SLC19A2/GCLC/SLC46A1/TNF	6
GO:0009409	response to cold	3/580	44/18805	0.0681818181818182	2.21061912225705	1.43420497798942	0.153609799295648	0.48438079764206	0.427754511529723	HSPA2/PCSK1N/EIF2AK3	3
GO:0014002	astrocyte development	3/580	44/18805	0.0681818181818182	2.21061912225705	1.43420497798942	0.153609799295648	0.48438079764206	0.427754511529723	S100A8/S100A9/TNF	3
GO:0030201	heparan sulfate proteoglycan metabolic process	3/580	44/18805	0.0681818181818182	2.21061912225705	1.43420497798942	0.153609799295648	0.48438079764206	0.427754511529723	UGDH/IDS/EXT1	3
GO:0035794	positive regulation of mitochondrial membrane permeability	3/580	44/18805	0.0681818181818182	2.21061912225705	1.43420497798942	0.153609799295648	0.48438079764206	0.427754511529723	IER3/HSPA1A/GCLC	3
GO:0042092	type 2 immune response	3/580	44/18805	0.0681818181818182	2.21061912225705	1.43420497798942	0.153609799295648	0.48438079764206	0.427754511529723	BCL6/MYB/ECM1	3
GO:0046006	regulation of activated T cell proliferation	3/580	44/18805	0.0681818181818182	2.21061912225705	1.43420497798942	0.153609799295648	0.48438079764206	0.427754511529723	IGFBP2/PYCARD/PPP3CA	3
GO:0048821	erythrocyte development	3/580	44/18805	0.0681818181818182	2.21061912225705	1.43420497798942	0.153609799295648	0.48438079764206	0.427754511529723	MED1/BCL6/KLF2	3
GO:0051938	L-glutamate import	3/580	44/18805	0.0681818181818182	2.21061912225705	1.43420497798942	0.153609799295648	0.48438079764206	0.427754511529723	ARL6IP1/SLC38A2/TNF	3
GO:0060236	regulation of mitotic spindle organization	3/580	44/18805	0.0681818181818182	2.21061912225705	1.43420497798942	0.153609799295648	0.48438079764206	0.427754511529723	HSPA1A/NUP62/HSPA1B	3
GO:0043467	regulation of generation of precursor metabolites and energy	7/580	143/18805	0.048951048951049	1.58711116469737	1.25722965051958	0.153770518613791	0.484507053098179	0.427866007157178	IER3/EIF6/DNAJC15/PPP2CA/IRS1/TNF/INSR	7
GO:0010975	regulation of neuron projection development	18/580	448/18805	0.0401785714285714	1.30268626847291	1.15674124722048	0.15396534094546	0.484507053098179	0.427866007157178	KLF4/CERS2/EFNA1/SLC30A1/IGF1R/PREX1/MBOAT1/S100A9/RGS2/EHD1/ROBO2/PMP22/NFATC4/DAB1/MAP1B/MFSD2A/PPP3CA/TNIK	18
GO:0032102	negative regulation of response to external stimulus	18/580	448/18805	0.0401785714285714	1.30268626847291	1.15674124722048	0.15396534094546	0.484507053098179	0.427866007157178	PRDX2/KLF4/ZFP36/CERS2/DDT/IER3/SOCS3/PLK2/PSMA1/YTHDF3/CYLD/LTF/PIM1/PLAT/ROBO2/TNF/FXR1/SLC12A2	18
GO:0033002	muscle cell proliferation	11/580	251/18805	0.0438247011952191	1.42090259651051	1.19758139119372	0.154592191634224	0.485598348812956	0.428829725511995	FRS2/IGFBP5/IGF1R/MYB/FOXP1/PIM1/GNA12/YAP1/TNF/TGFBR3/PIK3R1	11
GO:0002088	lens development in camera-type eye	5/580	92/18805	0.0543478260869565	1.76208770614693	1.30717131848678	0.154839152247934	0.485598348812956	0.428829725511995	FRS2/MED1/CDKN1C/HIPK1/BCAR3	5
GO:0031123	RNA 3'-end processing	5/580	92/18805	0.0543478260869565	1.76208770614693	1.30717131848678	0.154839152247934	0.485598348812956	0.428829725511995	CDK9/EXOSC6/LARP7/RPRD1B/LEO1	5
GO:0071230	cellular response to amino acid stimulus	5/580	92/18805	0.0543478260869565	1.76208770614693	1.30717131848678	0.154839152247934	0.485598348812956	0.428829725511995	CEBPB/SOCS1/GCLC/TNF/NEURL1	5
GO:1904063	negative regulation of cation transmembrane transport	5/580	92/18805	0.0543478260869565	1.76208770614693	1.30717131848678	0.154839152247934	0.485598348812956	0.428829725511995	CALM2/KCNE4/SLC30A1/STK39/PPP3CA	5
GO:0045765	regulation of angiogenesis	15/580	363/18805	0.0413223140495868	1.33976916500427	1.16610757388802	0.155085247006956	0.486039274123159	0.429219104677324	KLF4/PDCD6/JUP/EFNA1/GADD45A/ADM/PLK2/CXCR4/KLF2/SEMA3E/HIPK1/CXCL8/TNF/ECM1/SLC12A2	15
GO:0051223	regulation of protein transport	18/580	449/18805	0.0400890868596882	1.29978496275248	1.14696282082923	0.156092543939776	0.488304590936368	0.431219595802511	OAZ1/JUP/BAG3/ATP13A2/MPC2/ABAT/TFAP2B/TMEM30B/VAMP2/DNAJC1/IRS1/IER3IP1/FRAT2/TNF/MYO18A/PPP3CA/SLC12A2/PIK3R1	18
GO:0007549	sex-chromosome dosage compensation	2/580	23/18805	0.0869565217391304	2.81934032983508	1.55744348442421	0.157363028717454	0.488304590936368	0.431219595802511	CDYL/RBM15B	2
GO:0009651	response to salt stress	2/580	23/18805	0.0869565217391304	2.81934032983508	1.55744348442421	0.157363028717454	0.488304590936368	0.431219595802511	EFHD1/TNF	2
GO:0023019	signal transduction involved in regulation of gene expression	2/580	23/18805	0.0869565217391304	2.81934032983508	1.55744348442421	0.157363028717454	0.488304590936368	0.431219595802511	MESP1/MSX2	2
GO:0032986	protein-DNA complex disassembly	2/580	23/18805	0.0869565217391304	2.81934032983508	1.55744348442421	0.157363028717454	0.488304590936368	0.431219595802511	MYC/SMARCC2	2
GO:0035855	megakaryocyte development	2/580	23/18805	0.0869565217391304	2.81934032983508	1.55744348442421	0.157363028717454	0.488304590936368	0.431219595802511	MED1/ZFPM1	2
GO:0036092	phosphatidylinositol-3-phosphate biosynthetic process	2/580	23/18805	0.0869565217391304	2.81934032983508	1.55744348442421	0.157363028717454	0.488304590936368	0.431219595802511	OCRL/PIK3C2G	2
GO:0042745	circadian sleep/wake cycle	2/580	23/18805	0.0869565217391304	2.81934032983508	1.55744348442421	0.157363028717454	0.488304590936368	0.431219595802511	BLOC1S6/FXR1	2
GO:0045723	positive regulation of fatty acid biosynthetic process	2/580	23/18805	0.0869565217391304	2.81934032983508	1.55744348442421	0.157363028717454	0.488304590936368	0.431219595802511	ELOVL5/MID1IP1	2
GO:0045762	positive regulation of adenylate cyclase activity	2/580	23/18805	0.0869565217391304	2.81934032983508	1.55744348442421	0.157363028717454	0.488304590936368	0.431219595802511	CAP2/RAF1	2
GO:0060143	positive regulation of syncytium formation by plasma membrane fusion	2/580	23/18805	0.0869565217391304	2.81934032983508	1.55744348442421	0.157363028717454	0.488304590936368	0.431219595802511	GDF15/EHD1	2
GO:0070166	enamel mineralization	2/580	23/18805	0.0869565217391304	2.81934032983508	1.55744348442421	0.157363028717454	0.488304590936368	0.431219595802511	ITGB6/MSX2	2
GO:1902254	negative regulation of intrinsic apoptotic signaling pathway by p53 class mediator	2/580	23/18805	0.0869565217391304	2.81934032983508	1.55744348442421	0.157363028717454	0.488304590936368	0.431219595802511	TAF9/MUC1	2
GO:0040013	negative regulation of locomotion	17/580	421/18805	0.0403800475059382	1.3092186092227	1.14470087368744	0.157538673541251	0.488304590936368	0.431219595802511	SPINT2/KLF4/JUP/CERS2/IGFBP5/GADD45A/DDT/GDF15/ARRDC3/CSNK2B/PFN2/ROBO2/SAP30/GNA12/TNF/TGFBR3/LIMCH1	17
GO:0000271	polysaccharide biosynthetic process	4/580	68/18805	0.0588235294117647	1.90720081135903	1.3369439720751	0.157821909247721	0.488304590936368	0.431219595802511	IRS1/EXT1/INSR/AGL	4
GO:0016445	somatic diversification of immunoglobulins	4/580	68/18805	0.0588235294117647	1.90720081135903	1.3369439720751	0.157821909247721	0.488304590936368	0.431219595802511	BCL6/HMCES/EXOSC6/NFKBIZ	4
GO:0032414	positive regulation of ion transmembrane transporter activity	4/580	68/18805	0.0588235294117647	1.90720081135903	1.3369439720751	0.157821909247721	0.488304590936368	0.431219595802511	CALM2/STK39/LRRC26/HTT	4
GO:0060675	ureteric bud morphogenesis	4/580	68/18805	0.0588235294117647	1.90720081135903	1.3369439720751	0.157821909247721	0.488304590936368	0.431219595802511	MYC/GPC3/HOXB7/NPNT	4
GO:0150116	regulation of cell-substrate junction organization	4/580	68/18805	0.0588235294117647	1.90720081135903	1.3369439720751	0.157821909247721	0.488304590936368	0.431219595802511	EPB41L5/LDB1/PIK3R1/LIMCH1	4
GO:0072384	organelle transport along microtubule	5/580	93/18805	0.0537634408602151	1.74314052651094	1.28161524638852	0.159791386650858	0.493735022334341	0.436015185432289	BLOC1S1/BLOC1S6/NEFH/MAP1B/HTT	5
GO:0097194	execution phase of apoptosis	5/580	93/18805	0.0537634408602151	1.74314052651094	1.28161524638852	0.159791386650858	0.493735022334341	0.436015185432289	NDUFA13/CTSD/RIPK1/ENDOG/NFKBIZ	5
GO:0003176	aortic valve development	3/580	45/18805	0.0666666666666667	2.16149425287356	1.39159306137204	0.161057303326615	0.495321092407021	0.437415836805122	EFNA1/SNAI1/ROBO2	3
GO:0007007	inner mitochondrial membrane organization	3/580	45/18805	0.0666666666666667	2.16149425287356	1.39159306137204	0.161057303326615	0.495321092407021	0.437415836805122	CHCHD3/NDUFA13/TMEM11	3
GO:0032092	positive regulation of protein binding	3/580	45/18805	0.0666666666666667	2.16149425287356	1.39159306137204	0.161057303326615	0.495321092407021	0.437415836805122	FKBP1A/AKTIP/PPP2CA	3
GO:0060428	lung epithelium development	3/580	45/18805	0.0666666666666667	2.16149425287356	1.39159306137204	0.161057303326615	0.495321092407021	0.437415836805122	AGR2/KLF2/YAP1	3
GO:0090148	membrane fission	3/580	45/18805	0.0666666666666667	2.16149425287356	1.39159306137204	0.161057303326615	0.495321092407021	0.437415836805122	EXOC2/EXOC4/UBAP1	3
GO:1901861	regulation of muscle tissue development	3/580	45/18805	0.0666666666666667	2.16149425287356	1.39159306137204	0.161057303326615	0.495321092407021	0.437415836805122	IGFBP5/LEF1/ERBB3	3
GO:1990776	response to angiotensin	3/580	45/18805	0.0666666666666667	2.16149425287356	1.39159306137204	0.161057303326615	0.495321092407021	0.437415836805122	IGF1R/CA2/PPP3CA	3
GO:0031333	negative regulation of protein-containing complex assembly	7/580	145/18805	0.0482758620689655	1.56521997621879	1.21885216589786	0.161572059389184	0.496572700204116	0.438521126041358	SPTAN1/ADD3/CLU/CLDN7/DNAJC15/PFN2/RAF1	7
GO:0051170	import into nucleus	8/580	172/18805	0.0465116279069767	1.50801924619086	1.1940110520824	0.163054288894746	0.500794072625397	0.442249001107505	HNRNPA1/JUP/MED1/BAG3/NUP62/NUP98/PPP3CA/PIK3R1	8
GO:0034599	cellular response to oxidative stress	11/580	254/18805	0.0433070866141732	1.4041202823785	1.15677579577236	0.163322165284093	0.501125319669475	0.442541523887567	PRDX2/PCGF2/ATP13A2/PEX2/HSPA1A/MYB/KLF2/RIPK1/FOXP1/ENDOG/HSPA1B	11
GO:0050900	leukocyte migration	16/580	395/18805	0.0405063291139241	1.31331296377128	1.12267840228696	0.163471486099325	0.501125319669475	0.442541523887567	S100A7/DDT/PYCARD/PREX1/GDF15/S100A8/CXCR4/STK39/CKLF/S100A9/CXCL8/TNF/ECM1/EXT1/SLC12A2/PIK3R1	16
GO:0048857	neural nucleus development	4/580	69/18805	0.0579710144927536	1.87956021989006	1.3057409823883	0.163742130883394	0.501125319669475	0.442541523887567	CALM2/BASP1/KCNC2/CNP	4
GO:0072171	mesonephric tubule morphogenesis	4/580	69/18805	0.0579710144927536	1.87956021989006	1.3057409823883	0.163742130883394	0.501125319669475	0.442541523887567	MYC/GPC3/HOXB7/NPNT	4
GO:2000144	positive regulation of DNA-templated transcription initiation	4/580	69/18805	0.0579710144927536	1.87956021989006	1.3057409823883	0.163742130883394	0.501125319669475	0.442541523887567	MED1/BCLAF1/MED14/TAF9	4
GO:0051258	protein polymerization	12/580	282/18805	0.0425531914893617	1.37967718268525	1.14601087440199	0.163814788674241	0.501125319669475	0.442541523887567	AMBRA1/ARPC3/SPTAN1/BAIAP2L1/ADD3/PYCARD/PREX1/MID1IP1/HSPA1A/PFN2/MAP1B/HSPA1B	12
GO:0055006	cardiac cell development	5/580	94/18805	0.0531914893617021	1.72459647835657	1.25636837505824	0.164807177040143	0.502128712464485	0.443427615567896	SORBS2/FHL2/RGS2/FOXP1/TGFBR3	5
GO:0042180	ketone metabolic process	10/580	227/18805	0.0440528634361234	1.42830016709707	1.15815595002173	0.165183389202226	0.502128712464485	0.443427615567896	STARD3/ELOVL5/GDF15/ADM/MID1IP1/EIF6/VKORC1/IRS1/KYNU/MFSD2A	10
GO:0001889	liver development	7/580	146/18805	0.0479452054794521	1.55449929145017	1.19988214449422	0.165538682958792	0.502128712464485	0.443427615567896	CEBPB/MED1/MESP1/TNF/TGFBR3/CDKN2B/ARID5B	7
GO:0008064	regulation of actin polymerization or depolymerization	7/580	146/18805	0.0479452054794521	1.55449929145017	1.19988214449422	0.165538682958792	0.502128712464485	0.443427615567896	ARPC3/SPTAN1/BAIAP2L1/ADD3/PYCARD/PREX1/PFN2	7
GO:1900180	regulation of protein localization to nucleus	7/580	146/18805	0.0479452054794521	1.55449929145017	1.19988214449422	0.165538682958792	0.502128712464485	0.443427615567896	JUP/BAG3/ATP13A2/LARP7/YAP1/EIF2AK3/PIK3R1	7
GO:0006605	protein targeting	14/580	339/18805	0.0412979351032448	1.33897874071814	1.12354700144892	0.165728497888214	0.502128712464485	0.443427615567896	BAG3/ARL6IP1/NDUFA13/CLU/LEPROT/DNAJC15/ZFAND2A/ZDHHC7/IMMP2L/BLOC1S6/GDAP1/NRARP/RHOU/SEC62	14
GO:0051250	negative regulation of lymphocyte activation	8/580	173/18805	0.046242774566474	1.49930237193542	1.17696159703172	0.166693901102307	0.502128712464485	0.443427615567896	CEBPB/PRDX2/BCL6/SOCS1/LGALS1/PGLYRP2/PELI1/NRARP	8
GO:0006123	mitochondrial electron transport, cytochrome c to oxygen	2/580	24/18805	0.0833333333333333	2.70186781609195	1.48825530569568	0.168348787815295	0.502128712464485	0.443427615567896	COX6A1/COX8A	2
GO:0007263	nitric oxide mediated signal transduction	2/580	24/18805	0.0833333333333333	2.70186781609195	1.48825530569568	0.168348787815295	0.502128712464485	0.443427615567896	RASD1/KCNC2	2
GO:0008156	negative regulation of DNA replication	2/580	24/18805	0.0833333333333333	2.70186781609195	1.48825530569568	0.168348787815295	0.502128712464485	0.443427615567896	BCL6/TSPYL2	2
GO:0010839	negative regulation of keratinocyte proliferation	2/580	24/18805	0.0833333333333333	2.70186781609195	1.48825530569568	0.168348787815295	0.502128712464485	0.443427615567896	MED1/OVOL1	2
GO:0030277	maintenance of gastrointestinal epithelium	2/580	24/18805	0.0833333333333333	2.70186781609195	1.48825530569568	0.168348787815295	0.502128712464485	0.443427615567896	TFF3/TFF1	2
GO:0032770	positive regulation of monooxygenase activity	2/580	24/18805	0.0833333333333333	2.70186781609195	1.48825530569568	0.168348787815295	0.502128712464485	0.443427615567896	ESR1/TNF	2
GO:0035162	embryonic hemopoiesis	2/580	24/18805	0.0833333333333333	2.70186781609195	1.48825530569568	0.168348787815295	0.502128712464485	0.443427615567896	MED1/ZFPM1	2
GO:0035331	negative regulation of hippo signaling	2/580	24/18805	0.0833333333333333	2.70186781609195	1.48825530569568	0.168348787815295	0.502128712464485	0.443427615567896	PPP2CA/MAP2K3	2
GO:0035335	peptidyl-tyrosine dephosphorylation	2/580	24/18805	0.0833333333333333	2.70186781609195	1.48825530569568	0.168348787815295	0.502128712464485	0.443427615567896	DUSP5/DUSP6	2
GO:0042659	regulation of cell fate specification	2/580	24/18805	0.0833333333333333	2.70186781609195	1.48825530569568	0.168348787815295	0.502128712464485	0.443427615567896	CHD4/MESP1	2
GO:0043576	regulation of respiratory gaseous exchange	2/580	24/18805	0.0833333333333333	2.70186781609195	1.48825530569568	0.168348787815295	0.502128712464485	0.443427615567896	GLS/FTO	2
GO:0045063	T-helper 1 cell differentiation	2/580	24/18805	0.0833333333333333	2.70186781609195	1.48825530569568	0.168348787815295	0.502128712464485	0.443427615567896	LEF1/NFKBIZ	2
GO:0046885	regulation of hormone biosynthetic process	2/580	24/18805	0.0833333333333333	2.70186781609195	1.48825530569568	0.168348787815295	0.502128712464485	0.443427615567896	IGF1R/ADM	2
GO:0050650	chondroitin sulfate proteoglycan biosynthetic process	2/580	24/18805	0.0833333333333333	2.70186781609195	1.48825530569568	0.168348787815295	0.502128712464485	0.443427615567896	UGDH/SLC35B2	2
GO:0051131	chaperone-mediated protein complex assembly	2/580	24/18805	0.0833333333333333	2.70186781609195	1.48825530569568	0.168348787815295	0.502128712464485	0.443427615567896	HSPA1A/CLU	2
GO:0060252	positive regulation of glial cell proliferation	2/580	24/18805	0.0833333333333333	2.70186781609195	1.48825530569568	0.168348787815295	0.502128712464485	0.443427615567896	MYB/TNF	2
GO:0061318	renal filtration cell differentiation	2/580	24/18805	0.0833333333333333	2.70186781609195	1.48825530569568	0.168348787815295	0.502128712464485	0.443427615567896	BASP1/EXT1	2
GO:0062099	negative regulation of programmed necrotic cell death	2/580	24/18805	0.0833333333333333	2.70186781609195	1.48825530569568	0.168348787815295	0.502128712464485	0.443427615567896	RIPK1/PELI1	2
GO:0072112	podocyte differentiation	2/580	24/18805	0.0833333333333333	2.70186781609195	1.48825530569568	0.168348787815295	0.502128712464485	0.443427615567896	BASP1/EXT1	2
GO:0097066	response to thyroid hormone	2/580	24/18805	0.0833333333333333	2.70186781609195	1.48825530569568	0.168348787815295	0.502128712464485	0.443427615567896	MED1/GCLC	2
GO:0098743	cell aggregation	2/580	24/18805	0.0833333333333333	2.70186781609195	1.48825530569568	0.168348787815295	0.502128712464485	0.443427615567896	LTF/BMPR1B	2
GO:1901673	regulation of mitotic spindle assembly	2/580	24/18805	0.0833333333333333	2.70186781609195	1.48825530569568	0.168348787815295	0.502128712464485	0.443427615567896	HSPA1A/HSPA1B	2
GO:1903861	positive regulation of dendrite extension	2/580	24/18805	0.0833333333333333	2.70186781609195	1.48825530569568	0.168348787815295	0.502128712464485	0.443427615567896	CXCR4/ITSN2	2
GO:0003016	respiratory system process	3/580	46/18805	0.0652173913043478	2.11450524737631	1.35008633416893	0.168611486473314	0.502128712464485	0.443427615567896	GLS/BLOC1S6/FTO	3
GO:0005978	glycogen biosynthetic process	3/580	46/18805	0.0652173913043478	2.11450524737631	1.35008633416893	0.168611486473314	0.502128712464485	0.443427615567896	IRS1/INSR/AGL	3
GO:0009250	glucan biosynthetic process	3/580	46/18805	0.0652173913043478	2.11450524737631	1.35008633416893	0.168611486473314	0.502128712464485	0.443427615567896	IRS1/INSR/AGL	3
GO:0014014	negative regulation of gliogenesis	3/580	46/18805	0.0652173913043478	2.11450524737631	1.35008633416893	0.168611486473314	0.502128712464485	0.443427615567896	CERS2/DAB1/CDKN2B	3
GO:0021762	substantia nigra development	3/580	46/18805	0.0652173913043478	2.11450524737631	1.35008633416893	0.168611486473314	0.502128712464485	0.443427615567896	CALM2/BASP1/CNP	3
GO:0032892	positive regulation of organic acid transport	3/580	46/18805	0.0652173913043478	2.11450524737631	1.35008633416893	0.168611486473314	0.502128712464485	0.443427615567896	ARL6IP1/ABAT/SLC12A2	3
GO:0034314	Arp2/3 complex-mediated actin nucleation	3/580	46/18805	0.0652173913043478	2.11450524737631	1.35008633416893	0.168611486473314	0.502128712464485	0.443427615567896	ARPC3/ARPC1A/ARPC1B	3
GO:0060563	neuroepithelial cell differentiation	3/580	46/18805	0.0652173913043478	2.11450524737631	1.35008633416893	0.168611486473314	0.502128712464485	0.443427615567896	CEBPB/LEF1/MAP1B	3
GO:0070741	response to interleukin-6	3/580	46/18805	0.0652173913043478	2.11450524737631	1.35008633416893	0.168611486473314	0.502128712464485	0.443427615567896	IL6ST/RIPK1/YAP1	3
GO:1900744	regulation of p38MAPK cascade	3/580	46/18805	0.0652173913043478	2.11450524737631	1.35008633416893	0.168611486473314	0.502128712464485	0.443427615567896	GADD45A/CYLD/STK39	3
GO:1903214	regulation of protein targeting to mitochondrion	3/580	46/18805	0.0652173913043478	2.11450524737631	1.35008633416893	0.168611486473314	0.502128712464485	0.443427615567896	BAG3/LEPROT/RHOU	3
GO:0090257	regulation of muscle system process	11/580	256/18805	0.0429688	1.39315059267241	1.12985839360908	0.169275490798382	0.503780481982007	0.444886285826021	CALM2/IL6ST/JUP/FKBP1A/IGFBP5/ABAT/RGS2/FOXP1/PPP3CA/NPNT/TNNT1	11
GO:2000401	regulation of lymphocyte migration	4/580	70/18805	0.0571428571428571	1.85270935960591	1.27505392005446	0.169741175437358	0.504840280981219	0.445822189572483	S100A7/PYCARD/STK39/ECM1	4
GO:0015807	L-amino acid transport	5/580	95/18805	0.0526315789473684	1.70644283121597	1.23142305650151	0.169884902681629	0.50494177203501	0.44591181586723	ARL6IP1/SLC38A2/SERINC5/SLC43A1/TNF	5
GO:0030308	negative regulation of cell growth	8/580	174/18805	0.0459770114942529	1.49068569163694	1.16001948698757	0.170370543563864	0.505407014938003	0.446322669789767	RERG/BCL6/HSPA1A/TSPYL2/RGS2/FOXP1/OSGIN1/HSPA1B	8
GO:0048660	regulation of smooth muscle cell proliferation	8/580	174/18805	0.0459770114942529	1.49068569163694	1.16001948698757	0.170370543563864	0.505407014938003	0.446322669789767	FRS2/IGFBP5/IGF1R/MYB/FOXP1/GNA12/TNF/PIK3R1	8
GO:0055002	striated muscle cell development	8/580	174/18805	0.0459770114942529	1.49068569163694	1.16001948698757	0.170370543563864	0.505407014938003	0.446322669789767	SORBS2/SMYD3/FHL2/RGS2/FOXP1/KRT19/PPP3CA/TNNT1	8
GO:0006661	phosphatidylinositol biosynthetic process	6/580	121/18805	0.0495867768595041	1.60772299800513	1.19637898829005	0.170997755848173	0.506615216200987	0.447389626910265	PIP4K2B/IMPA2/OCRL/PIGN/PIK3C2G/PIK3R1	6
GO:0043414	macromolecule methylation	6/580	121/18805	0.0495867768595041	1.60772299800513	1.19637898829005	0.170997755848173	0.506615216200987	0.447389626910265	SNRPD3/TRMT5/RBM15B/LARP7/TFB2M/TRMT1	6
GO:0002520	immune system development	9/580	202/18805	0.0445544554455446	1.44456299078184	1.13324248230903	0.173243178865972	0.512608429695267	0.45268220688705	PRDX2/BCL6/MAFB/LEF1/HMCES/EXOSC6/RAF1/NFKBIZ/CDKN2B	9
GO:0032409	regulation of transporter activity	9/580	202/18805	0.0445544554455446	1.44456299078184	1.13324248230903	0.173243178865972	0.512608429695267	0.45268220688705	CALM2/FKBP1A/KCNE4/STK39/VAMP2/RIPK1/PIM1/LRRC26/HTT	9
GO:0007269	neurotransmitter secretion	7/580	148/18805	0.0472972972972973	1.53349254426841	1.16236802823067	0.173600106734009	0.512884259117097	0.452925790613272	SLC38A2/NAPA/FBXL20/SLC30A1/VAMP2/PFN2/BLOC1S6	7
GO:0099643	signal release from synapse	7/580	148/18805	0.0472972972972973	1.53349254426841	1.16236802823067	0.173600106734009	0.512884259117097	0.452925790613272	SLC38A2/NAPA/FBXL20/SLC30A1/VAMP2/PFN2/BLOC1S6	7
GO:0051048	negative regulation of secretion	8/580	175/18805	0.0457142857142857	1.48216748768473	1.14318329393105	0.17408368684451	0.512884259117097	0.452925790613272	SLC30A1/ABAT/STK39/IRS1/PTGER3/TNF/PPP3CA/ERBB3	8
GO:0071674	mononuclear cell migration	10/580	230/18805	0.0434782608695652	1.40967016491754	1.11516516079215	0.17476753872308	0.512884259117097	0.452925790613272	S100A7/DDT/PYCARD/CXCR4/STK39/CKLF/TNF/ECM1/EXT1/SLC12A2	10
GO:0000423	mitophagy	5/580	96/18805	0.0520833333333333	1.68866738505747	1.20677191420844	0.175022915895632	0.512884259117097	0.452925790613272	AMBRA1/MAP1LC3B2/LRBA/SNX30/HTT	5
GO:0048704	embryonic skeletal system morphogenesis	5/580	96/18805	0.0520833333333333	1.68866738505747	1.20677191420844	0.175022915895632	0.512884259117097	0.452925790613272	PCGF2/HOXB3/HOXB7/SLC39A1/HOXC9	5
GO:0106027	neuron projection organization	5/580	96/18805	0.0520833333333333	1.68866738505747	1.20677191420844	0.175022915895632	0.512884259117097	0.452925790613272	EFNA1/SLC30A1/IGF1R/TANC1/INSR	5
GO:0099003	vesicle-mediated transport in synapse	11/580	258/18805	0.0426356589147287	1.38235097567495	1.10316524060512	0.175333189801146	0.512884259117097	0.452925790613272	CALM2/ARPC3/NAPA/FBXL20/MX1/AMPH/VAMP2/PFN2/BLOC1S6/ITSN2/NCDN	11
GO:0071621	granulocyte chemotaxis	6/580	122/18805	0.0491803278688525	1.59454494064443	1.17529434293589	0.175519826146019	0.512884259117097	0.452925790613272	S100A7/PREX1/S100A8/CKLF/S100A9/CXCL8	6
GO:0003208	cardiac ventricle morphogenesis	4/580	71/18805	0.0563380281690141	1.82661486158329	1.24486562597193	0.175816137300485	0.512884259117097	0.452925790613272	MED1/FKBP1A/MESP1/TGFBR3	4
GO:0010611	regulation of cardiac muscle hypertrophy	4/580	71/18805	0.0563380281690141	1.82661486158329	1.24486562597193	0.175816137300485	0.512884259117097	0.452925790613272	IL6ST/RGS2/FOXP1/PPP3CA	4
GO:0045600	positive regulation of fat cell differentiation	4/580	71/18805	0.0563380281690141	1.82661486158329	1.24486562597193	0.175816137300485	0.512884259117097	0.452925790613272	CEBPB/ZFP36/ADIRF/PIM1	4
GO:0046513	ceramide biosynthetic process	4/580	71/18805	0.0563380281690141	1.82661486158329	1.24486562597193	0.175816137300485	0.512884259117097	0.452925790613272	SPTSSA/CERS2/SPTSSB/SPTLC2	4
GO:0050435	amyloid-beta metabolic process	4/580	71/18805	0.0563380281690141	1.82661486158329	1.24486562597193	0.175816137300485	0.512884259117097	0.452925790613272	EFNA1/CLU/PSENEN/TNF	4
GO:0019216	regulation of lipid metabolic process	14/580	343/18805	0.0408163265306122	1.32336382828994	1.07821277714997	0.176136053598033	0.512884259117097	0.452925790613272	ELOVL5/CERS2/CRTC3/SNAI1/IGF1R/GDF15/ADM/MID1IP1/EIF6/DNAJC15/IRS1/FMO5/MFSD2A/TNF	14
GO:0042742	defense response to bacterium	14/580	343/18805	0.0408163265306122	1.32336382828994	1.07821277714997	0.176136053598033	0.512884259117097	0.452925790613272	CEBPB/PYCARD/SLC30A1/ADM/S100A8/LTF/S100A9/FOXP1/SEH1L/PGLYRP2/LCN2/NFKBIZ/TNF/CYBA	14
GO:0003009	skeletal muscle contraction	3/580	47/18805	0.0638297872340425	2.06951577402788	1.30962876968129	0.17626612408577	0.512884259117097	0.452925790613272	FKBP1A/TNF/TNNT1	3
GO:0007520	myoblast fusion	3/580	47/18805	0.0638297872340425	2.06951577402788	1.30962876968129	0.17626612408577	0.512884259117097	0.452925790613272	GDF15/TANC1/EHD1	3
GO:0010824	regulation of centrosome duplication	3/580	47/18805	0.0638297872340425	2.06951577402788	1.30962876968129	0.17626612408577	0.512884259117097	0.452925790613272	PLK2/NUP62/KAT2A	3
GO:0031641	regulation of myelination	3/580	47/18805	0.0638297872340425	2.06951577402788	1.30962876968129	0.17626612408577	0.512884259117097	0.452925790613272	TYMP/TNF/EIF2AK3	3
GO:0042789	mRNA transcription by RNA polymerase II	3/580	47/18805	0.0638297872340425	2.06951577402788	1.30962876968129	0.17626612408577	0.512884259117097	0.452925790613272	MED1/TAF9/NFKBIZ	3
GO:0050798	activated T cell proliferation	3/580	47/18805	0.0638297872340425	2.06951577402788	1.30962876968129	0.17626612408577	0.512884259117097	0.452925790613272	IGFBP2/PYCARD/PPP3CA	3
GO:0055010	ventricular cardiac muscle tissue morphogenesis	3/580	47/18805	0.0638297872340425	2.06951577402788	1.30962876968129	0.17626612408577	0.512884259117097	0.452925790613272	MED1/FKBP1A/TGFBR3	3
GO:0055078	sodium ion homeostasis	3/580	47/18805	0.0638297872340425	2.06951577402788	1.30962876968129	0.17626612408577	0.512884259117097	0.452925790613272	MLLT6/EXT1/SLC12A2	3
GO:0071548	response to dexamethasone	3/580	47/18805	0.0638297872340425	2.06951577402788	1.30962876968129	0.17626612408577	0.512884259117097	0.452925790613272	IGF1R/SMYD3/USP8	3
GO:0046474	glycerophospholipid biosynthetic process	9/580	203/18805	0.0443349753694581	1.43744691693562	1.11788958118131	0.176707567025301	0.512884259117097	0.452925790613272	PIP4K2B/IMPA2/OCRL/FAR1/PIGN/MFSD2A/PIK3C2G/DHRS7B/PIK3R1	9
GO:0009306	protein secretion	15/580	372/18805	0.0403225806451613	1.3073553948832	1.06811901960561	0.177211695222524	0.512884259117097	0.452925790613272	PDIA4/ATP13A2/MPC2/ABAT/TFAP2B/FAM3B/DNAJC1/IRS1/IER3IP1/BLOC1S6/RAF1/TNF/MYO18A/PPP3CA/SLC12A2	15
GO:1901342	regulation of vasculature development	15/580	372/18805	0.0403225806451613	1.3073553948832	1.06811901960561	0.177211695222524	0.512884259117097	0.452925790613272	KLF4/PDCD6/JUP/EFNA1/GADD45A/ADM/PLK2/CXCR4/KLF2/SEMA3E/HIPK1/CXCL8/TNF/ECM1/SLC12A2	15
GO:0050807	regulation of synapse organization	13/580	315/18805	0.0412698412698413	1.33806787082649	1.0794339401385	0.177308784348594	0.512884259117097	0.452925790613272	TPBG/EFNA1/CHD4/NEDD8/SLC30A1/CAP2/TANC1/ROBO2/NFATC4/DAB1/MAP1B/TNF/NEURL1	13
GO:0030832	regulation of actin filament length	7/580	149/18805	0.0469798657718121	1.52320064799815	1.14381948478868	0.177693445366609	0.512884259117097	0.452925790613272	ARPC3/SPTAN1/BAIAP2L1/ADD3/PYCARD/PREX1/PFN2	7
GO:0061008	hepaticobiliary system development	7/580	149/18805	0.0469798657718121	1.52320064799815	1.14381948478868	0.177693445366609	0.512884259117097	0.452925790613272	CEBPB/MED1/MESP1/TNF/TGFBR3/CDKN2B/ARID5B	7
GO:0090090	negative regulation of canonical Wnt signaling pathway	7/580	149/18805	0.0469798657718121	1.52320064799815	1.14381948478868	0.177693445366609	0.512884259117097	0.452925790613272	IGFBP4/IGFBP2/TPBG/AMFR/MESP1/CYLD/GPC3	7
GO:0010001	glial cell differentiation	11/580	259/18805	0.0424710424710425	1.37701371322061	1.08990150194337	0.178400528834463	0.512884259117097	0.452925790613272	IL6ST/S100A8/CLU/CXCR4/S100A9/LEF1/DAB1/RAF1/TNF/CNP/ERBB3	11
GO:0006817	phosphate ion transport	2/580	25/18805	0.08	2.59379310344828	1.4225236752887	0.179459393465761	0.512884259117097	0.452925790613272	CEBPB/SLC37A1	2
GO:0009162	deoxyribonucleoside monophosphate metabolic process	2/580	25/18805	0.08	2.59379310344828	1.4225236752887	0.179459393465761	0.512884259117097	0.452925790613272	TYMP/DCK	2
GO:0010842	retina layer formation	2/580	25/18805	0.08	2.59379310344828	1.4225236752887	0.179459393465761	0.512884259117097	0.452925790613272	TFAP2B/HIPK1	2
GO:0030220	platelet formation	2/580	25/18805	0.08	2.59379310344828	1.4225236752887	0.179459393465761	0.512884259117097	0.452925790613272	TPM4/ZFPM1	2
GO:0030859	polarized epithelial cell differentiation	2/580	25/18805	0.08	2.59379310344828	1.4225236752887	0.179459393465761	0.512884259117097	0.452925790613272	ZDHHC7/YAP1	2
GO:0033617	mitochondrial cytochrome c oxidase assembly	2/580	25/18805	0.08	2.59379310344828	1.4225236752887	0.179459393465761	0.512884259117097	0.452925790613272	COX14/PET100	2
GO:0035336	long-chain fatty-acyl-CoA metabolic process	2/580	25/18805	0.08	2.59379310344828	1.4225236752887	0.179459393465761	0.512884259117097	0.452925790613272	ELOVL5/FAR1	2
GO:0042178	xenobiotic catabolic process	2/580	25/18805	0.08	2.59379310344828	1.4225236752887	0.179459393465761	0.512884259117097	0.452925790613272	GSTM3/CRYZ	2
GO:0043371	negative regulation of CD4-positive, alpha-beta T cell differentiation	2/580	25/18805	0.08	2.59379310344828	1.4225236752887	0.179459393465761	0.512884259117097	0.452925790613272	BCL6/LGALS1	2
GO:0044090	positive regulation of vacuole organization	2/580	25/18805	0.08	2.59379310344828	1.4225236752887	0.179459393465761	0.512884259117097	0.452925790613272	PIP4K2B/SNX30	2
GO:0045932	negative regulation of muscle contraction	2/580	25/18805	0.08	2.59379310344828	1.4225236752887	0.179459393465761	0.512884259117097	0.452925790613272	RGS2/TNNT1	2
GO:0048169	regulation of long-term neuronal synaptic plasticity	2/580	25/18805	0.08	2.59379310344828	1.4225236752887	0.179459393465761	0.512884259117097	0.452925790613272	NEURL1/FXR1	2
GO:0048207	vesicle targeting, rough ER to cis-Golgi	2/580	25/18805	0.08	2.59379310344828	1.4225236752887	0.179459393465761	0.512884259117097	0.452925790613272	PDCD6/TRAPPC1	2
GO:0048208	COPII vesicle coating	2/580	25/18805	0.08	2.59379310344828	1.4225236752887	0.179459393465761	0.512884259117097	0.452925790613272	PDCD6/TRAPPC1	2
GO:0070233	negative regulation of T cell apoptotic process	2/580	25/18805	0.08	2.59379310344828	1.4225236752887	0.179459393465761	0.512884259117097	0.452925790613272	TSC22D3/EFNA1	2
GO:0072311	glomerular epithelial cell differentiation	2/580	25/18805	0.08	2.59379310344828	1.4225236752887	0.179459393465761	0.512884259117097	0.452925790613272	BASP1/EXT1	2
GO:0090335	regulation of brown fat cell differentiation	2/580	25/18805	0.08	2.59379310344828	1.4225236752887	0.179459393465761	0.512884259117097	0.452925790613272	PIM1/FTO	2
GO:1901526	positive regulation of mitophagy	2/580	25/18805	0.08	2.59379310344828	1.4225236752887	0.179459393465761	0.512884259117097	0.452925790613272	AMBRA1/HTT	2
GO:1901623	regulation of lymphocyte chemotaxis	2/580	25/18805	0.08	2.59379310344828	1.4225236752887	0.179459393465761	0.512884259117097	0.452925790613272	S100A7/STK39	2
GO:1903241	U2-type prespliceosome assembly	2/580	25/18805	0.08	2.59379310344828	1.4225236752887	0.179459393465761	0.512884259117097	0.452925790613272	SNRPD3/SF3B3	2
GO:1903579	negative regulation of ATP metabolic process	2/580	25/18805	0.08	2.59379310344828	1.4225236752887	0.179459393465761	0.512884259117097	0.452925790613272	IER3/PPP2CA	2
GO:1903902	positive regulation of viral life cycle	2/580	25/18805	0.08	2.59379310344828	1.4225236752887	0.179459393465761	0.512884259117097	0.452925790613272	TMPRSS2/LGALS1	2
GO:0035821	modulation of process of another organism	6/580	123/18805	0.0487804878048781	1.58158116063919	1.15440061969378	0.180090277946155	0.513781831916801	0.453718433130005	LTF/CDK9/S100A9/LEF1/PIK3C2G/NUCKS1	6
GO:0046634	regulation of alpha-beta T cell activation	6/580	123/18805	0.0487804878048781	1.58158116063919	1.15440061969378	0.180090277946155	0.513781831916801	0.453718433130005	BRD2/BCL6/JUNB/SOCS1/LGALS1/NFKBIZ	6
GO:0019915	lipid storage	5/580	97/18805	0.0515463917525773	1.67125844294348	1.1824078307354	0.180219544253864	0.513781831916801	0.453718433130005	EHD1/HILPDA/TNF/FTO/NRIP1	5
GO:0170062	nutrient storage	5/580	97/18805	0.0515463917525773	1.67125844294348	1.1824078307354	0.180219544253864	0.513781831916801	0.453718433130005	EHD1/HILPDA/TNF/FTO/NRIP1	5
GO:0071222	cellular response to lipopolysaccharide	10/580	232/18805	0.0431034482758621	1.39751783590963	1.08683829395501	0.181299141291058	0.516539977691963	0.456154139302763	PRDX2/ZFP36/LDOC1/PYCARD/LTF/PRPF8/CXCL8/NFKBIZ/TNF/MAP2K3	10
GO:0050680	negative regulation of epithelial cell proliferation	8/580	177/18805	0.0451977401129944	1.46541983245665	1.1098230835201	0.181617295727332	0.517126626338577	0.456672206093382	MED1/PEX2/OVOL1/CDKN1C/GPC3/TNF/TGFBR3/CDKN2B	8
GO:0006879	intracellular iron ion homeostasis	4/580	72/18805	0.0555555555555556	1.80124521072797	1.2151597555102	0.181964089579179	0.517474420179801	0.456979341275846	MYC/ATP13A2/STEAP4/SLC46A1	4
GO:0140895	cell surface toll-like receptor signaling pathway	4/580	72/18805	0.0555555555555556	1.80124521072797	1.2151597555102	0.181964089579179	0.517474420179801	0.456979341275846	LTF/PELI1/CYBA/PIK3R1	4
GO:0016236	macroautophagy	15/580	374/18805	0.0401069518716578	1.30036418956297	1.04668223825939	0.182334265898791	0.518207256629076	0.457626505859819	AMBRA1/BAG3/HSPB8/ATP13A2/MAP1LC3B2/PEX2/CTSD/EXOC4/LRBA/PACS2/PIP4K2B/SNX30/WDR24/HTT/SPTLC2	15
GO:0001881	receptor recycling	3/580	48/18805	0.0625	2.02640086206897	1.27016835101842	0.184015044750501	0.519777627937192	0.459013293724023	PEX2/CTSD/NSF	3
GO:0002673	regulation of acute inflammatory response	3/580	48/18805	0.0625	2.02640086206897	1.27016835101842	0.184015044750501	0.519777627937192	0.459013293724023	IL6ST/PTGER3/TNF	3
GO:0008038	neuron recognition	3/580	48/18805	0.0625	2.02640086206897	1.27016835101842	0.184015044750501	0.519777627937192	0.459013293724023	CXCR4/ROBO2/EXT1	3
GO:0033138	positive regulation of peptidyl-serine phosphorylation	3/580	48/18805	0.0625	2.02640086206897	1.27016835101842	0.184015044750501	0.519777627937192	0.459013293724023	PFN2/RAF1/TNF	3
GO:0042119	neutrophil activation	3/580	48/18805	0.0625	2.02640086206897	1.27016835101842	0.184015044750501	0.519777627937192	0.459013293724023	PREX1/CXCL8/TNF	3
GO:0090224	regulation of spindle organization	3/580	48/18805	0.0625	2.02640086206897	1.27016835101842	0.184015044750501	0.519777627937192	0.459013293724023	HSPA1A/NUP62/HSPA1B	3
GO:0098534	centriole assembly	3/580	48/18805	0.0625	2.02640086206897	1.27016835101842	0.184015044750501	0.519777627937192	0.459013293724023	PLK2/NUP62/KAT2A	3
GO:0141085	regulation of inflammasome-mediated signaling pathway	3/580	48/18805	0.0625	2.02640086206897	1.27016835101842	0.184015044750501	0.519777627937192	0.459013293724023	NEK7/ZDHHC5/PPP2CA	3
GO:1902108	regulation of mitochondrial membrane permeability involved in apoptotic process	3/580	48/18805	0.0625	2.02640086206897	1.27016835101842	0.184015044750501	0.519777627937192	0.459013293724023	IER3/HSPA1A/GCLC	3
GO:2000516	positive regulation of CD4-positive, alpha-beta T cell activation	3/580	48/18805	0.0625	2.02640086206897	1.27016835101842	0.184015044750501	0.519777627937192	0.459013293724023	BRD2/SOCS1/NFKBIZ	3
GO:0000956	nuclear-transcribed mRNA catabolic process	6/580	124/18805	0.0483870967741935	1.56882647385984	1.13369422060778	0.184708016659217	0.520777131425345	0.459895950774898	ZFP36/LSM4/NT5C3B/CNOT11/EXOSC6/CASC3	6
GO:0071887	leukocyte apoptotic process	6/580	124/18805	0.0483870967741935	1.56882647385984	1.13369422060778	0.184708016659217	0.520777131425345	0.459895950774898	TSC22D3/EFNA1/BCL6/RIPK1/FOXP1/NFKBIZ	6
GO:0072329	monocarboxylic acid catabolic process	6/580	124/18805	0.0483870967741935	1.56882647385984	1.13369422060778	0.184708016659217	0.520777131425345	0.459895950774898	PEX2/IRS1/SLC27A2/MFSD2A/SORD/ETFB	6
GO:0035592	establishment of protein localization to extracellular region	15/580	375/18805	0.04	1.29689655172414	1.03600885957107	0.184922773951254	0.521063742870598	0.460149056057683	PDIA4/ATP13A2/MPC2/ABAT/TFAP2B/FAM3B/DNAJC1/IRS1/IER3IP1/BLOC1S6/RAF1/TNF/MYO18A/PPP3CA/SLC12A2	15
GO:0048659	smooth muscle cell proliferation	8/580	178/18805	0.0449438202247191	1.45718713676869	1.09329634490321	0.185436641247415	0.5219758938685	0.460954572515909	FRS2/IGFBP5/IGF1R/MYB/FOXP1/GNA12/TNF/PIK3R1	8
GO:0000281	mitotic cytokinesis	5/580	98/18805	0.0510204081632653	1.65420478536242	1.15832393597803	0.185473092742074	0.5219758938685	0.460954572515909	JTB/EXOC2/EXOC4/NUP62/USP8	5
GO:0045786	negative regulation of cell cycle	16/580	405/18805	0.0395061728395062	1.28088548318433	1.01942022139645	0.187817259306485	0.524547660898692	0.463225688454284	KLF4/RBL2/BCL6/IER3/TEX14/OVOL1/APBB2/TSPYL2/CDKN1C/MAD2L1BP/THAP5/PPP1R13B/KAT2A/HOXC9/TNF/CDKN2B	16
GO:0030595	leukocyte chemotaxis	10/580	234/18805	0.0427350427350427	1.38557323902151	1.05877216936669	0.187941336763003	0.524547660898692	0.463225688454284	S100A7/DDT/PREX1/S100A8/CXCR4/STK39/CKLF/S100A9/CXCL8/SLC12A2	10
GO:0008652	amino acid biosynthetic process	4/580	73/18805	0.0547945205479452	1.77657061880019	1.18592072890549	0.188182088666078	0.524547660898692	0.463225688454284	MRI1/ABAT/SERINC5/GLS	4
GO:0014015	positive regulation of gliogenesis	4/580	73/18805	0.0547945205479452	1.77657061880019	1.18592072890549	0.188182088666078	0.524547660898692	0.463225688454284	IL6ST/MYB/CXCR4/TNF	4
GO:0060260	regulation of transcription initiation by RNA polymerase II	4/580	73/18805	0.0547945205479452	1.77657061880019	1.18592072890549	0.188182088666078	0.524547660898692	0.463225688454284	MYC/MED1/MED14/TAF9	4
GO:0060415	muscle tissue morphogenesis	4/580	73/18805	0.0547945205479452	1.77657061880019	1.18592072890549	0.188182088666078	0.524547660898692	0.463225688454284	MED1/FKBP1A/ZFPM1/TGFBR3	4
GO:0070830	bicellular tight junction assembly	4/580	73/18805	0.0547945205479452	1.77657061880019	1.18592072890549	0.188182088666078	0.524547660898692	0.463225688454284	SNAI1/RAB13/CLDN7/TNF	4
GO:0070371	ERK1 and ERK2 cascade	13/580	319/18805	0.0407523510971787	1.32128959031456	1.03246626774164	0.188564786441749	0.524547660898692	0.463225688454284	FRS2/TPBG/MYC/S100A7/DUSP5/DDT/PYCARD/GAREM1/TRAF7/TNF/NPNT/DUSP6/DUSP4	13
GO:0010562	positive regulation of phosphorus metabolic process	19/580	493/18805	0.0385395537525355	1.24954535916626	1.00163713420367	0.189316025703475	0.524547660898692	0.463225688454284	CALM2/TRAF4/JTB/NDUFC2/EFNA1/CDK2AP1/LTF/AKTIP/RIPK1/PIM1/PPP2CA/PFN2/RAF1/TNF/MAP2K3/TNIK/AREG/INSR/LIMCH1	19
GO:0045937	positive regulation of phosphate metabolic process	19/580	493/18805	0.0385395537525355	1.24954535916626	1.00163713420367	0.189316025703475	0.524547660898692	0.463225688454284	CALM2/TRAF4/JTB/NDUFC2/EFNA1/CDK2AP1/LTF/AKTIP/RIPK1/PIM1/PPP2CA/PFN2/RAF1/TNF/MAP2K3/TNIK/AREG/INSR/LIMCH1	19
GO:0034767	positive regulation of monoatomic ion transmembrane transport	7/580	152/18805	0.0460526315789474	1.49313747731397	1.08898226653035	0.190214875304329	0.524547660898692	0.463225688454284	CALM2/FXYD3/STK39/KCNC2/LRRC26/HTT/PPP3CA	7
GO:0035107	appendage morphogenesis	7/580	152/18805	0.0460526315789474	1.49313747731397	1.08898226653035	0.190214875304329	0.524547660898692	0.463225688454284	MED1/TFAP2B/LEF1/MSX2/GPC3/GNA12/EXT1	7
GO:0035108	limb morphogenesis	7/580	152/18805	0.0460526315789474	1.49313747731397	1.08898226653035	0.190214875304329	0.524547660898692	0.463225688454284	MED1/TFAP2B/LEF1/MSX2/GPC3/GNA12/EXT1	7
GO:0000470	maturation of LSU-rRNA	2/580	26/18805	0.0769230769230769	2.49403183023873	1.35992714529196	0.190676737052121	0.524547660898692	0.463225688454284	RPL7/EIF6	2
GO:0002082	regulation of oxidative phosphorylation	2/580	26/18805	0.0769230769230769	2.49403183023873	1.35992714529196	0.190676737052121	0.524547660898692	0.463225688454284	DNAJC15/TNF	2
GO:0003148	outflow tract septum morphogenesis	2/580	26/18805	0.0769230769230769	2.49403183023873	1.35992714529196	0.190676737052121	0.524547660898692	0.463225688454284	MSX2/ROBO2	2
GO:0006027	glycosaminoglycan catabolic process	2/580	26/18805	0.0769230769230769	2.49403183023873	1.35992714529196	0.190676737052121	0.524547660898692	0.463225688454284	IDS/PGLYRP2	2
GO:0007039	protein catabolic process in the vacuole	2/580	26/18805	0.0769230769230769	2.49403183023873	1.35992714529196	0.190676737052121	0.524547660898692	0.463225688454284	ATP13A2/USP8	2
GO:0016973	poly(A)+ mRNA export from nucleus	2/580	26/18805	0.0769230769230769	2.49403183023873	1.35992714529196	0.190676737052121	0.524547660898692	0.463225688454284	NXF1/GLE1	2
GO:0018345	protein palmitoylation	2/580	26/18805	0.0769230769230769	2.49403183023873	1.35992714529196	0.190676737052121	0.524547660898692	0.463225688454284	ZDHHC5/ZDHHC7	2
GO:0032212	positive regulation of telomere maintenance via telomerase	2/580	26/18805	0.0769230769230769	2.49403183023873	1.35992714529196	0.190676737052121	0.524547660898692	0.463225688454284	HNRNPA1/NEK7	2
GO:0033622	integrin activation	2/580	26/18805	0.0769230769230769	2.49403183023873	1.35992714529196	0.190676737052121	0.524547660898692	0.463225688454284	SKAP1/FARP2	2
GO:0034138	toll-like receptor 3 signaling pathway	2/580	26/18805	0.0769230769230769	2.49403183023873	1.35992714529196	0.190676737052121	0.524547660898692	0.463225688454284	PELI1/TNF	2
GO:0043931	ossification involved in bone maturation	2/580	26/18805	0.0769230769230769	2.49403183023873	1.35992714529196	0.190676737052121	0.524547660898692	0.463225688454284	LTF/EXT1	2
GO:0045624	positive regulation of T-helper cell differentiation	2/580	26/18805	0.0769230769230769	2.49403183023873	1.35992714529196	0.190676737052121	0.524547660898692	0.463225688454284	BRD2/NFKBIZ	2
GO:0046629	gamma-delta T cell activation	2/580	26/18805	0.0769230769230769	2.49403183023873	1.35992714529196	0.190676737052121	0.524547660898692	0.463225688454284	LEF1/EGR3	2
GO:0048596	embryonic camera-type eye morphogenesis	2/580	26/18805	0.0769230769230769	2.49403183023873	1.35992714529196	0.190676737052121	0.524547660898692	0.463225688454284	FRS2/HIPK1	2
GO:0060065	uterus development	2/580	26/18805	0.0769230769230769	2.49403183023873	1.35992714529196	0.190676737052121	0.524547660898692	0.463225688454284	ESR1/CDKN1C	2
GO:0060740	prostate gland epithelium morphogenesis	2/580	26/18805	0.0769230769230769	2.49403183023873	1.35992714529196	0.190676737052121	0.524547660898692	0.463225688454284	FRS2/ESR1	2
GO:1901021	positive regulation of calcium ion transmembrane transporter activity	2/580	26/18805	0.0769230769230769	2.49403183023873	1.35992714529196	0.190676737052121	0.524547660898692	0.463225688454284	CALM2/HTT	2
GO:2000209	regulation of anoikis	2/580	26/18805	0.0769230769230769	2.49403183023873	1.35992714529196	0.190676737052121	0.524547660898692	0.463225688454284	MCL1/CEACAM6	2
GO:2000773	negative regulation of cellular senescence	2/580	26/18805	0.0769230769230769	2.49403183023873	1.35992714529196	0.190676737052121	0.524547660898692	0.463225688454284	BCL6/PLK2	2
GO:2000810	regulation of bicellular tight junction assembly	2/580	26/18805	0.0769230769230769	2.49403183023873	1.35992714529196	0.190676737052121	0.524547660898692	0.463225688454284	SNAI1/TNF	2
GO:0034766	negative regulation of monoatomic ion transmembrane transport	5/580	99/18805	0.0505050505050505	1.63749564611634	1.13451359609033	0.190781845886275	0.524547660898692	0.463225688454284	CALM2/KCNE4/SLC30A1/STK39/PPP3CA	5
GO:0042982	amyloid precursor protein metabolic process	5/580	99/18805	0.0505050505050505	1.63749564611634	1.13451359609033	0.190781845886275	0.524547660898692	0.463225688454284	FKBP1A/EFNA1/CLU/PSENEN/TNF	5
GO:0098869	cellular oxidant detoxification	5/580	99/18805	0.0505050505050505	1.63749564611634	1.13451359609033	0.190781845886275	0.524547660898692	0.463225688454284	PRDX2/TXNRD1/S100A9/NNT/PXDNL	5
GO:0051347	positive regulation of transferase activity	11/580	263/18805	0.0418250950570342	1.35607053887505	1.03738742017349	0.190920066293547	0.524547660898692	0.463225688454284	CALM2/TRAF4/JTB/EFNA1/ARRDC3/LTF/PIM1/PPP2CA/TNF/MAP2K3/INSR	11
GO:0002861	regulation of inflammatory response to antigenic stimulus	3/580	49/18805	0.0612244897959184	1.9850457424349	1.23165670591591	0.19185213992062	0.524547660898692	0.463225688454284	PLK2/PSMA1/TNF	3
GO:0006775	fat-soluble vitamin metabolic process	3/580	49/18805	0.0612244897959184	1.9850457424349	1.23165670591591	0.19185213992062	0.524547660898692	0.463225688454284	SNAI1/VKORC1/TNF	3
GO:0033628	regulation of cell adhesion mediated by integrin	3/580	49/18805	0.0612244897959184	1.9850457424349	1.23165670591591	0.19185213992062	0.524547660898692	0.463225688454284	EFNA1/SKAP1/MUC1	3
GO:0042149	cellular response to glucose starvation	3/580	49/18805	0.0612244897959184	1.9850457424349	1.23165670591591	0.19185213992062	0.524547660898692	0.463225688454284	PMAIP1/HNRNPA1/EIF2AK3	3
GO:0048489	synaptic vesicle transport	3/580	49/18805	0.0612244897959184	1.9850457424349	1.23165670591591	0.19185213992062	0.524547660898692	0.463225688454284	MX1/BLOC1S1/BLOC1S6	3
GO:0060043	regulation of cardiac muscle cell proliferation	3/580	49/18805	0.0612244897959184	1.9850457424349	1.23165670591591	0.19185213992062	0.524547660898692	0.463225688454284	PIM1/YAP1/TGFBR3	3
GO:0098927	vesicle-mediated transport between endosomal compartments	3/580	49/18805	0.0612244897959184	1.9850457424349	1.23165670591591	0.19185213992062	0.524547660898692	0.463225688454284	AKTIP/MYO1D/HOOK3	3
GO:1902003	regulation of amyloid-beta formation	3/580	49/18805	0.0612244897959184	1.9850457424349	1.23165670591591	0.19185213992062	0.524547660898692	0.463225688454284	EFNA1/CLU/TNF	3
GO:1902459	positive regulation of stem cell population maintenance	3/580	49/18805	0.0612244897959184	1.9850457424349	1.23165670591591	0.19185213992062	0.524547660898692	0.463225688454284	SAP30/YAP1/BICRAL	3
GO:1905314	semi-lunar valve development	3/580	49/18805	0.0612244897959184	1.9850457424349	1.23165670591591	0.19185213992062	0.524547660898692	0.463225688454284	EFNA1/SNAI1/ROBO2	3
GO:1905710	positive regulation of membrane permeability	3/580	49/18805	0.0612244897959184	1.9850457424349	1.23165670591591	0.19185213992062	0.524547660898692	0.463225688454284	IER3/HSPA1A/GCLC	3
GO:0050803	regulation of synapse structure or activity	13/580	321/18805	0.0404984423676012	1.31305725641852	1.00921491595748	0.194316802548705	0.529497808499862	0.467597141615612	TPBG/EFNA1/CHD4/NEDD8/SLC30A1/CAP2/TANC1/ROBO2/NFATC4/DAB1/MAP1B/TNF/NEURL1	13
GO:0046467	membrane lipid biosynthetic process	7/580	153/18805	0.0457516339869281	1.4833784088348	1.07096581716485	0.194466546979948	0.529497808499862	0.467597141615612	SPTSSA/ELOVL5/CERS2/SCCPDH/SPTSSB/PIGN/SPTLC2	7
GO:0030858	positive regulation of epithelial cell differentiation	4/580	74/18805	0.0540540540540541	1.75256290773532	1.15713368531892	0.19446717863724	0.529497808499862	0.467597141615612	MED1/MESP1/LEF1/CDKN2B	4
GO:0032732	positive regulation of interleukin-1 production	4/580	74/18805	0.0540540540540541	1.75256290773532	1.15713368531892	0.19446717863724	0.529497808499862	0.467597141615612	PYDC1/PYCARD/NLRP2/TNF	4
GO:0060411	cardiac septum morphogenesis	4/580	74/18805	0.0540540540540541	1.75256290773532	1.15713368531892	0.19446717863724	0.529497808499862	0.467597141615612	ZFPM1/MSX2/ROBO2/TGFBR3	4
GO:1902475	L-alpha-amino acid transmembrane transport	4/580	74/18805	0.0540540540540541	1.75256290773532	1.15713368531892	0.19446717863724	0.529497808499862	0.467597141615612	ARL6IP1/SLC38A2/SLC43A1/TNF	4
GO:1903051	negative regulation of proteolysis involved in protein catabolic process	4/580	74/18805	0.0540540540540541	1.75256290773532	1.15713368531892	0.19446717863724	0.529497808499862	0.467597141615612	EFNA1/CSNK2B/F8A1/TAF9	4
GO:0006935	chemotaxis	18/580	466/18805	0.0386266094420601	1.25236791475507	0.984112213916133	0.194639551714058	0.529654113849183	0.467735174169078	TPBG/S100A7/DDT/RAB13/PREX1/S100A8/CXCR4/TYMP/STK39/CKLF/S100A9/LEF1/SEMA3E/ROBO2/CXCL8/PIK3C2G/EGR3/SLC12A2	18
GO:0016197	endosomal transport	12/580	293/18805	0.0409556313993174	1.32788042838649	1.00908553974449	0.196013864449197	0.532490117711019	0.470239636469238	YKT6/RAB13/LEPROT/TRAPPC10/AKTIP/BLOC1S1/MYO1D/EHD1/SNX30/ITSN2/UBAP1/HOOK3	12
GO:0021675	nerve development	5/580	100/18805	0.05	1.62112068965517	1.11097040300806	0.19614406984059	0.532490117711019	0.470239636469238	MAFB/KCNC2/HOXB3/EXT1/ERBB3	5
GO:0051346	negative regulation of hydrolase activity	5/580	100/18805	0.05	1.62112068965517	1.11097040300806	0.19614406984059	0.532490117711019	0.470239636469238	CSTB/TIMP3/RGS2/CSTA/ECM1	5
GO:1903432	regulation of TORC1 signaling	5/580	100/18805	0.05	1.62112068965517	1.11097040300806	0.19614406984059	0.532490117711019	0.470239636469238	PIM1/SEH1L/USP32/WDR24/PELI1	5
GO:0010970	transport along microtubule	8/580	181/18805	0.0441988950276243	1.43303486378358	1.0443138035108	0.197097882934577	0.534764397337806	0.472248042614927	BAG3/LCA5L/BLOC1S1/BLOC1S6/NEFH/DYNC1I2/MAP1B/HTT	8
GO:0098739	import across plasma membrane	9/580	209/18805	0.0430622009569378	1.39618049826761	1.02745265258005	0.198138431054855	0.537262660247174	0.47445424739363	ARL6IP1/SLC38A2/SLC30A1/RGS2/SLC46A1/SLC43A1/TNF/PPP3CA/SLC12A2	9
GO:0042330	taxis	18/580	468/18805	0.0384615384615385	1.24701591511936	0.965359487448576	0.199458943571495	0.537262660247174	0.47445424739363	TPBG/S100A7/DDT/RAB13/PREX1/S100A8/CXCR4/TYMP/STK39/CKLF/S100A9/LEF1/SEMA3E/ROBO2/CXCL8/PIK3C2G/EGR3/SLC12A2	18
GO:0006024	glycosaminoglycan biosynthetic process	3/580	50/18805	0.06	1.94534482758621	1.19404878157874	0.19977137269014	0.537262660247174	0.47445424739363	UGDH/SLC35B2/EXT1	3
GO:0035850	epithelial cell differentiation involved in kidney development	3/580	50/18805	0.06	1.94534482758621	1.19404878157874	0.19977137269014	0.537262660247174	0.47445424739363	BASP1/YAP1/EXT1	3
GO:0042551	neuron maturation	3/580	50/18805	0.06	1.94534482758621	1.19404878157874	0.19977137269014	0.537262660247174	0.47445424739363	RND1/CDKN1C/FARP2	3
GO:0044788	modulation by host of viral process	3/580	50/18805	0.06	1.94534482758621	1.19404878157874	0.19977137269014	0.537262660247174	0.47445424739363	LTF/PIK3C2G/NUCKS1	3
GO:0045071	negative regulation of viral genome replication	3/580	50/18805	0.06	1.94534482758621	1.19404878157874	0.19977137269014	0.537262660247174	0.47445424739363	MX1/LTF/TNF	3
GO:0046636	negative regulation of alpha-beta T cell activation	3/580	50/18805	0.06	1.94534482758621	1.19404878157874	0.19977137269014	0.537262660247174	0.47445424739363	BCL6/SOCS1/LGALS1	3
GO:0047496	vesicle transport along microtubule	3/580	50/18805	0.06	1.94534482758621	1.19404878157874	0.19977137269014	0.537262660247174	0.47445424739363	BLOC1S1/BLOC1S6/HTT	3
GO:0048538	thymus development	3/580	50/18805	0.06	1.94534482758621	1.19404878157874	0.19977137269014	0.537262660247174	0.47445424739363	PRDX2/MAFB/RAF1	3
GO:0060976	coronary vasculature development	3/580	50/18805	0.06	1.94534482758621	1.19404878157874	0.19977137269014	0.537262660247174	0.47445424739363	MESP1/GPC3/TGFBR3	3
GO:0170034	L-amino acid biosynthetic process	3/580	50/18805	0.06	1.94534482758621	1.19404878157874	0.19977137269014	0.537262660247174	0.47445424739363	MRI1/SERINC5/GLS	3
GO:0003170	heart valve development	4/580	75/18805	0.0533333333333333	1.72919540229885	1.1287844402409	0.200816395476357	0.537262660247174	0.47445424739363	EFNA1/SNAI1/ZFPM1/ROBO2	4
GO:0003281	ventricular septum development	4/580	75/18805	0.0533333333333333	1.72919540229885	1.1287844402409	0.200816395476357	0.537262660247174	0.47445424739363	FRS2/ZFPM1/ROBO2/TGFBR3	4
GO:0032206	positive regulation of telomere maintenance	4/580	75/18805	0.0533333333333333	1.72919540229885	1.1287844402409	0.200816395476357	0.537262660247174	0.47445424739363	KLF4/MYC/HNRNPA1/NEK7	4
GO:0032411	positive regulation of transporter activity	4/580	75/18805	0.0533333333333333	1.72919540229885	1.1287844402409	0.200816395476357	0.537262660247174	0.47445424739363	CALM2/STK39/LRRC26/HTT	4
GO:0051881	regulation of mitochondrial membrane potential	4/580	75/18805	0.0533333333333333	1.72919540229885	1.1287844402409	0.200816395476357	0.537262660247174	0.47445424739363	PMAIP1/NDUFC2/NNT/GCLC	4
GO:1901880	negative regulation of protein depolymerization	4/580	75/18805	0.0533333333333333	1.72919540229885	1.1287844402409	0.200816395476357	0.537262660247174	0.47445424739363	SPTAN1/ADD3/MID1IP1/MAP1B	4
GO:2000379	positive regulation of reactive oxygen species metabolic process	4/580	75/18805	0.0533333333333333	1.72919540229885	1.1287844402409	0.200816395476357	0.537262660247174	0.47445424739363	GADD45A/RIPK1/NNT/CYBA	4
GO:0010596	negative regulation of endothelial cell migration	5/580	101/18805	0.0495049504950495	1.6050699897576	1.08768816453773	0.201558014434935	0.537262660247174	0.47445424739363	KLF4/JUP/GADD45A/CSNK2B/TNF	5
GO:0051216	cartilage development	9/580	210/18805	0.0428571428571429	1.38953201970443	1.01265163498453	0.201813438759654	0.537262660247174	0.47445424739363	SNAI1/HOXB3/MSX2/KAT2A/MEX3C/ECM1/EIF2AK3/EXT1/BMPR1B	9
GO:0051260	protein homooligomerization	9/580	210/18805	0.0428571428571429	1.38953201970443	1.01265163498453	0.201813438759654	0.537262660247174	0.47445424739363	G3BP2/CRTC3/PYCARD/CRYZ/STEAP4/BASP1/GLS/KCNC2/EHD1	9
GO:0003181	atrioventricular valve morphogenesis	2/580	27/18805	0.0740740740740741	2.40166028097063	1.30018553817299	0.201983704698959	0.537262660247174	0.47445424739363	EFNA1/ZFPM1	2
GO:0010884	positive regulation of lipid storage	2/580	27/18805	0.0740740740740741	2.40166028097063	1.30018553817299	0.201983704698959	0.537262660247174	0.47445424739363	EHD1/HILPDA	2
GO:0030194	positive regulation of blood coagulation	2/580	27/18805	0.0740740740740741	2.40166028097063	1.30018553817299	0.201983704698959	0.537262660247174	0.47445424739363	PRDX2/PLAT	2
GO:0035902	response to immobilization stress	2/580	27/18805	0.0740740740740741	2.40166028097063	1.30018553817299	0.201983704698959	0.537262660247174	0.47445424739363	TFF1/CERS2	2
GO:0036344	platelet morphogenesis	2/580	27/18805	0.0740740740740741	2.40166028097063	1.30018553817299	0.201983704698959	0.537262660247174	0.47445424739363	TPM4/ZFPM1	2
GO:0043043	peptide biosynthetic process	2/580	27/18805	0.0740740740740741	2.40166028097063	1.30018553817299	0.201983704698959	0.537262660247174	0.47445424739363	GCLC/BLOC1S6	2
GO:0044346	fibroblast apoptotic process	2/580	27/18805	0.0740740740740741	2.40166028097063	1.30018553817299	0.201983704698959	0.537262660247174	0.47445424739363	MYC/IER3IP1	2
GO:0048745	smooth muscle tissue development	2/580	27/18805	0.0740740740740741	2.40166028097063	1.30018553817299	0.201983704698959	0.537262660247174	0.47445424739363	TFAP2B/TIPARP	2
GO:0060333	type II interferon-mediated signaling pathway	2/580	27/18805	0.0740740740740741	2.40166028097063	1.30018553817299	0.201983704698959	0.537262660247174	0.47445424739363	MED1/RAF1	2
GO:0070193	synaptonemal complex organization	2/580	27/18805	0.0740740740740741	2.40166028097063	1.30018553817299	0.201983704698959	0.537262660247174	0.47445424739363	HSPA2/SYCP2	2
GO:1900048	positive regulation of hemostasis	2/580	27/18805	0.0740740740740741	2.40166028097063	1.30018553817299	0.201983704698959	0.537262660247174	0.47445424739363	PRDX2/PLAT	2
GO:1903859	regulation of dendrite extension	2/580	27/18805	0.0740740740740741	2.40166028097063	1.30018553817299	0.201983704698959	0.537262660247174	0.47445424739363	CXCR4/ITSN2	2
GO:1905039	carboxylic acid transmembrane transport	7/580	155/18805	0.0451612903225806	1.46423804226919	1.03531500094583	0.203081846843463	0.539871937915658	0.476758488808568	ARL6IP1/SLC38A2/MPC2/RGS2/SLC46A1/SLC43A1/TNF	7
GO:0006644	phospholipid metabolic process	15/580	383/18805	0.0391644908616188	1.26980732871162	0.951678131178813	0.206264087677098	0.547699511197919	0.483670983692998	MBOAT1/SERINC5/PIP4K2B/IMPA2/OCRL/BLOC1S6/FAR1/PIGN/MFSD2A/PIK3C2G/GPCPD1/DHRS7B/SRD5A3/SPTLC2/PIK3R1	15
GO:0071692	protein localization to extracellular region	15/580	383/18805	0.0391644908616188	1.26980732871162	0.951678131178813	0.206264087677098	0.547699511197919	0.483670983692998	PDIA4/ATP13A2/MPC2/ABAT/TFAP2B/FAM3B/DNAJC1/IRS1/IER3IP1/BLOC1S6/RAF1/TNF/MYO18A/PPP3CA/SLC12A2	15
GO:0006112	energy reserve metabolic process	5/580	102/18805	0.0490196078431373	1.58933400946586	1.06466089497538	0.207021915180924	0.547900161423934	0.48384817700833	IL6ST/IRS1/PPP1CB/INSR/AGL	5
GO:0010657	muscle cell apoptotic process	5/580	102/18805	0.0490196078431373	1.58933400946586	1.06466089497538	0.207021915180924	0.547900161423934	0.48384817700833	AMBRA1/ESR1/BAG3/GNGT1/IGF1R	5
GO:0016079	synaptic vesicle exocytosis	5/580	102/18805	0.0490196078431373	1.58933400946586	1.06466089497538	0.207021915180924	0.547900161423934	0.48384817700833	NAPA/FBXL20/VAMP2/PFN2/BLOC1S6	5
GO:0043279	response to alkaloid	5/580	102/18805	0.0490196078431373	1.58933400946586	1.06466089497538	0.207021915180924	0.547900161423934	0.48384817700833	FOSB/SPIDR/FKBP5/IGF1R/ABAT	5
GO:0048534	hematopoietic or lymphoid organ development	5/580	102/18805	0.0490196078431373	1.58933400946586	1.06466089497538	0.207021915180924	0.547900161423934	0.48384817700833	PRDX2/MAFB/RAF1/NFKBIZ/CDKN2B	5
GO:0000380	alternative mRNA splicing, via spliceosome	4/580	76/18805	0.0526315789473684	1.70644283121597	1.10085944595683	0.207226771126901	0.547900161423934	0.48384817700833	HNRNPA1/RBM15B/TIA1/RBM24	4
GO:0032008	positive regulation of TOR signaling	4/580	76/18805	0.0526315789473684	1.70644283121597	1.10085944595683	0.207226771126901	0.547900161423934	0.48384817700833	PIM1/SEH1L/USP32/WDR24	4
GO:0030041	actin filament polymerization	7/580	156/18805	0.0448717948717949	1.45485190097259	1.0176768336094	0.207443820425418	0.547900161423934	0.48384817700833	ARPC3/SPTAN1/BAIAP2L1/ADD3/PYCARD/PREX1/PFN2	7
GO:0006120	mitochondrial electron transport, NADH to ubiquinone	3/580	51/18805	0.0588235294117647	1.90720081135903	1.15730255445375	0.207766785762451	0.547900161423934	0.48384817700833	NDUFC2/DNAJC15/NDUFB8	3
GO:0006513	protein monoubiquitination	3/580	51/18805	0.0588235294117647	1.90720081135903	1.15730255445375	0.207766785762451	0.547900161423934	0.48384817700833	PDCD6/PEX2/NEURL1	3
GO:0045933	positive regulation of muscle contraction	3/580	51/18805	0.0588235294117647	1.90720081135903	1.15730255445375	0.207766785762451	0.547900161423934	0.48384817700833	ABAT/RGS2/NPNT	3
GO:1903146	regulation of autophagy of mitochondrion	3/580	51/18805	0.0588235294117647	1.90720081135903	1.15730255445375	0.207766785762451	0.547900161423934	0.48384817700833	AMBRA1/ATP13A2/HTT	3
GO:0032886	regulation of microtubule-based process	11/580	269/18805	0.0408921933085502	1.32582361235739	0.960187468128346	0.210417465017816	0.554572803968581	0.489740757734469	CCNL2/CFAP20/PLK2/MID1IP1/HSPA1A/CYLD/NUP62/NEFH/KAT2A/MAP1B/HSPA1B	11
GO:0017148	negative regulation of translation	9/580	213/18805	0.0422535211267606	1.36996114618747	0.968697574204389	0.213005853844492	0.55472266488467	0.489873099237831	ZFP36/IGFBP5/EIF6/RGS2/NANOS1/TIA1/RBM24/EIF2AK3/FXR1	9
GO:0003209	cardiac atrium morphogenesis	2/580	28/18805	0.0714285714285714	2.31588669950739	1.24305332430737	0.213364133313574	0.55472266488467	0.489873099237831	MESP1/ZFPM1	2
GO:0006007	glucose catabolic process	2/580	28/18805	0.0714285714285714	2.31588669950739	1.24305332430737	0.213364133313574	0.55472266488467	0.489873099237831	FOXK2/ENO2	2
GO:0006390	mitochondrial transcription	2/580	28/18805	0.0714285714285714	2.31588669950739	1.24305332430737	0.213364133313574	0.55472266488467	0.489873099237831	POLR2A/TFB2M	2
GO:0015740	C4-dicarboxylate transport	2/580	28/18805	0.0714285714285714	2.31588669950739	1.24305332430737	0.213364133313574	0.55472266488467	0.489873099237831	ABAT/SLC12A2	2
GO:0021544	subpallium development	2/580	28/18805	0.0714285714285714	2.31588669950739	1.24305332430737	0.213364133313574	0.55472266488467	0.489873099237831	OGDH/FOXP1	2
GO:0021801	cerebral cortex radial glia-guided migration	2/580	28/18805	0.0714285714285714	2.31588669950739	1.24305332430737	0.213364133313574	0.55472266488467	0.489873099237831	SOCS7/DAB1	2
GO:0022030	telencephalon glial cell migration	2/580	28/18805	0.0714285714285714	2.31588669950739	1.24305332430737	0.213364133313574	0.55472266488467	0.489873099237831	SOCS7/DAB1	2
GO:0032511	late endosome to vacuole transport via multivesicular body sorting pathway	2/580	28/18805	0.0714285714285714	2.31588669950739	1.24305332430737	0.213364133313574	0.55472266488467	0.489873099237831	LEPROT/UBAP1	2
GO:0034698	response to gonadotropin	2/580	28/18805	0.0714285714285714	2.31588669950739	1.24305332430737	0.213364133313574	0.55472266488467	0.489873099237831	GCLC/TGFBR3	2
GO:0035025	positive regulation of Rho protein signal transduction	2/580	28/18805	0.0714285714285714	2.31588669950739	1.24305332430737	0.213364133313574	0.55472266488467	0.489873099237831	LPAR2/FXR1	2
GO:0043173	nucleotide salvage	2/580	28/18805	0.0714285714285714	2.31588669950739	1.24305332430737	0.213364133313574	0.55472266488467	0.489873099237831	UCK2/DCK	2
GO:0046949	fatty-acyl-CoA biosynthetic process	2/580	28/18805	0.0714285714285714	2.31588669950739	1.24305332430737	0.213364133313574	0.55472266488467	0.489873099237831	ELOVL5/SLC27A2	2
GO:0050857	positive regulation of antigen receptor-mediated signaling pathway	2/580	28/18805	0.0714285714285714	2.31588669950739	1.24305332430737	0.213364133313574	0.55472266488467	0.489873099237831	CYLD/FOXP1	2
GO:0055022	negative regulation of cardiac muscle tissue growth	2/580	28/18805	0.0714285714285714	2.31588669950739	1.24305332430737	0.213364133313574	0.55472266488467	0.489873099237831	RGS2/FOXP1	2
GO:0060512	prostate gland morphogenesis	2/580	28/18805	0.0714285714285714	2.31588669950739	1.24305332430737	0.213364133313574	0.55472266488467	0.489873099237831	FRS2/ESR1	2
GO:0060575	intestinal epithelial cell differentiation	2/580	28/18805	0.0714285714285714	2.31588669950739	1.24305332430737	0.213364133313574	0.55472266488467	0.489873099237831	IL6ST/YAP1	2
GO:0061117	negative regulation of heart growth	2/580	28/18805	0.0714285714285714	2.31588669950739	1.24305332430737	0.213364133313574	0.55472266488467	0.489873099237831	RGS2/FOXP1	2
GO:0070536	protein K63-linked deubiquitination	2/580	28/18805	0.0714285714285714	2.31588669950739	1.24305332430737	0.213364133313574	0.55472266488467	0.489873099237831	CYLD/USP8	2
GO:0071624	positive regulation of granulocyte chemotaxis	2/580	28/18805	0.0714285714285714	2.31588669950739	1.24305332430737	0.213364133313574	0.55472266488467	0.489873099237831	S100A7/CXCL8	2
GO:0072010	glomerular epithelium development	2/580	28/18805	0.0714285714285714	2.31588669950739	1.24305332430737	0.213364133313574	0.55472266488467	0.489873099237831	BASP1/EXT1	2
GO:0097186	amelogenesis	2/580	28/18805	0.0714285714285714	2.31588669950739	1.24305332430737	0.213364133313574	0.55472266488467	0.489873099237831	ITGB6/MSX2	2
GO:1900543	negative regulation of purine nucleotide metabolic process	2/580	28/18805	0.0714285714285714	2.31588669950739	1.24305332430737	0.213364133313574	0.55472266488467	0.489873099237831	IER3/PPP2CA	2
GO:1903599	positive regulation of autophagy of mitochondrion	2/580	28/18805	0.0714285714285714	2.31588669950739	1.24305332430737	0.213364133313574	0.55472266488467	0.489873099237831	AMBRA1/HTT	2
GO:0006801	superoxide metabolic process	4/580	77/18805	0.051948051948052	1.68428123600537	1.07334575481644	0.213695337373525	0.554778312867183	0.489922241721788	PRDX2/PREX1/IMMP2L/CYBA	4
GO:1904377	positive regulation of protein localization to cell periphery	4/580	77/18805	0.051948051948052	1.68428123600537	1.07334575481644	0.213695337373525	0.554778312867183	0.489922241721788	AGR2/ZDHHC5/TNF/PIK3R1	4
GO:1901888	regulation of cell junction assembly	11/580	270/18805	0.0407407407407407	1.32091315453384	0.947498336244654	0.213746799509279	0.554778312867183	0.489922241721788	TPBG/CHD4/NEDD8/SNAI1/EPB41L5/LDB1/ROBO2/MAP1B/TNF/NEURL1/LIMCH1	11
GO:0009299	mRNA transcription	3/580	52/18805	0.0576923076923077	1.87052387267905	1.12137877057071	0.215832508660408	0.557991227496352	0.492759552231364	MED1/TAF9/NFKBIZ	3
GO:0016601	Rac protein signal transduction	3/580	52/18805	0.0576923076923077	1.87052387267905	1.12137877057071	0.215832508660408	0.557991227496352	0.492759552231364	RHOU/FARP2/TNS3	3
GO:0030838	positive regulation of actin filament polymerization	3/580	52/18805	0.0576923076923077	1.87052387267905	1.12137877057071	0.215832508660408	0.557991227496352	0.492759552231364	BAIAP2L1/PYCARD/PFN2	3
GO:0042461	photoreceptor cell development	3/580	52/18805	0.0576923076923077	1.87052387267905	1.12137877057071	0.215832508660408	0.557991227496352	0.492759552231364	GNGT1/SAMD11/MFSD2A	3
GO:0051155	positive regulation of striated muscle cell differentiation	3/580	52/18805	0.0576923076923077	1.87052387267905	1.12137877057071	0.215832508660408	0.557991227496352	0.492759552231364	MESP1/RBM24/KAT2A	3
GO:1903747	regulation of establishment of protein localization to mitochondrion	3/580	52/18805	0.0576923076923077	1.87052387267905	1.12137877057071	0.215832508660408	0.557991227496352	0.492759552231364	BAG3/LEPROT/RHOU	3
GO:1904262	negative regulation of TORC1 signaling	3/580	52/18805	0.0576923076923077	1.87052387267905	1.12137877057071	0.215832508660408	0.557991227496352	0.492759552231364	SEH1L/WDR24/PELI1	3
GO:0007173	epidermal growth factor receptor signaling pathway	7/580	158/18805	0.0443037974683544	1.43643605412484	0.982765785254715	0.216272195811766	0.558501124498209	0.493209839988479	GAREM1/AGR2/IGF1R/NUP62/BCAR3/AREG/INSR	7
GO:0098876	vesicle-mediated transport to the plasma membrane	7/580	158/18805	0.0443037974683544	1.43643605412484	0.982765785254715	0.216272195811766	0.558501124498209	0.493209839988479	RAB13/EXOC2/EXOC4/NSF/VAMP2/EHD1/SNX30	7
GO:0010563	negative regulation of phosphorus metabolic process	11/580	271/18805	0.040590405904059	1.31603893625143	0.934858770935707	0.217098048152777	0.560005995431044	0.494538784764829	CALM2/GADD45A/PYCARD/IER3/PREX1/PPP1R15B/SOCS1/CDKN1C/RGS2/PPP2CA/CDKN2B	11
GO:0045936	negative regulation of phosphate metabolic process	11/580	271/18805	0.040590405904059	1.31603893625143	0.934858770935707	0.217098048152777	0.560005995431044	0.494538784764829	CALM2/GADD45A/PYCARD/IER3/PREX1/PPP1R15B/SOCS1/CDKN1C/RGS2/PPP2CA/CDKN2B	11
GO:0070482	response to oxygen levels	14/580	358/18805	0.0391061452513966	1.26791562319399	0.913023653222746	0.217896594577827	0.561313964757837	0.495693846615343	PMAIP1/MYC/GNGT1/ADM/ABAT/MYB/CXCR4/PLAT/ENDOG/HILPDA/TNF/TGFBR3/PDLIM1/ITPR2	14
GO:0001960	negative regulation of cytokine-mediated signaling pathway	5/580	104/18805	0.0480769230769231	1.5587698938992	1.01934829936358	0.218092467314202	0.561313964757837	0.495693846615343	IL6ST/PYDC1/YTHDF3/CYLD/ECM1	5
GO:0003300	cardiac muscle hypertrophy	5/580	104/18805	0.0480769230769231	1.5587698938992	1.01934829936358	0.218092467314202	0.561313964757837	0.495693846615343	IL6ST/SORBS2/RGS2/FOXP1/PPP3CA	5
GO:0043266	regulation of potassium ion transport	5/580	104/18805	0.0480769230769231	1.5587698938992	1.01934829936358	0.218092467314202	0.561313964757837	0.495693846615343	KCNE4/STK39/VAMP2/KCNC2/LRRC26	5
GO:0050830	defense response to Gram-positive bacterium	6/580	131/18805	0.0458015267175573	1.48499605159252	0.993711974259635	0.218260812082358	0.561433590878516	0.495799487906382	PYCARD/ADM/LTF/SEH1L/PGLYRP2/TNF	6
GO:1903320	regulation of protein modification by small protein conjugation or removal	10/580	243/18805	0.0411522633744856	1.33425571165035	0.935567096070759	0.219121260214494	0.563332391634024	0.497476310343643	PDCD6/DCUN1D5/ARRDC3/HSPA1A/BEX3/GCLC/PELI1/TSPYL5/COPS5/HSPA1B	10
GO:0002637	regulation of immunoglobulin production	4/580	78/18805	0.0512820512820513	1.66268788682582	1.04623098507428	0.220219129554311	0.565208651730758	0.499133227226162	BCL6/HMCES/EXOSC6/TNF	4
GO:0071277	cellular response to calcium ion	4/580	78/18805	0.0512820512820513	1.66268788682582	1.04623098507428	0.220219129554311	0.565208651730758	0.499133227226162	JUND/FOSB/JUNB/ENDOG	4
GO:0072078	nephron tubule morphogenesis	4/580	78/18805	0.0512820512820513	1.66268788682582	1.04623098507428	0.220219129554311	0.565208651730758	0.499133227226162	MYC/GPC3/HOXB7/NPNT	4
GO:0045807	positive regulation of endocytosis	7/580	159/18805	0.0440251572327044	1.42740186510518	0.965489343770126	0.220736879654713	0.565320062200259	0.499231613312466	PYCARD/CLU/GPC3/MYO18A/PPP3CA/CYBA/INSR	7
GO:1903825	organic acid transmembrane transport	7/580	159/18805	0.0440251572327044	1.42740186510518	0.965489343770126	0.220736879654713	0.565320062200259	0.499231613312466	ARL6IP1/SLC38A2/MPC2/RGS2/SLC46A1/SLC43A1/TNF	7
GO:0006936	muscle contraction	14/580	359/18805	0.0389972144846797	1.26438382480069	0.902269657833939	0.220824164739491	0.565320062200259	0.499231613312466	CALM2/JUP/FKBP1A/KCNE4/ABAT/APBB2/CXCR4/TPM4/RGS2/PTGER3/TNF/MAP2K3/NPNT/TNNT1	14
GO:0016050	vesicle organization	15/580	389/18805	0.038560411311054	1.25022161155926	0.889625686390983	0.222974051934825	0.565320062200259	0.499231613312466	PDCD6/ATP13A2/MX1/TRAPPC10/VAMP2/AKTIP/BLOC1S1/PIP4K2B/BLOC1S6/TRAPPC9/MYO18A/USP8/UBAP1/HOOK3/TRAPPC1	15
GO:0014902	myotube differentiation	6/580	132/18805	0.0454545454545455	1.4737460815047	0.97438569032399	0.223215534091731	0.565320062200259	0.499231613312466	GDF15/SMYD3/TANC1/EHD1/RBM24/PPP3CA	6
GO:0009062	fatty acid catabolic process	5/580	105/18805	0.0476190476190476	1.54392446633826	0.997051956690817	0.223695535573267	0.565320062200259	0.499231613312466	PEX2/IRS1/SLC27A2/MFSD2A/ETFB	5
GO:0032602	chemokine production	5/580	105/18805	0.0476190476190476	1.54392446633826	0.997051956690817	0.223695535573267	0.565320062200259	0.499231613312466	KLF4/PYCARD/ZFPM1/FOXP1/TNF	5
GO:0032642	regulation of chemokine production	5/580	105/18805	0.0476190476190476	1.54392446633826	0.997051956690817	0.223695535573267	0.565320062200259	0.499231613312466	KLF4/PYCARD/ZFPM1/FOXP1/TNF	5
GO:0046942	carboxylic acid transport	14/580	360/18805	0.0388888888888889	1.26087164750958	0.89154681137952	0.22376852516635	0.565320062200259	0.499231613312466	ARL6IP1/SLC38A2/MPC2/ABAT/CRABP1/SLC19A2/SERINC5/RGS2/SLC27A2/SLC46A1/SLC43A1/MFSD2A/TNF/SLC12A2	14
GO:0050708	regulation of protein secretion	11/580	273/18805	0.0402930402930403	1.30639762536314	0.909726660619349	0.22386492226422	0.565320062200259	0.499231613312466	ATP13A2/MPC2/ABAT/TFAP2B/DNAJC1/IRS1/IER3IP1/TNF/MYO18A/PPP3CA/SLC12A2	11
GO:0000387	spliceosomal snRNP assembly	3/580	53/18805	0.0566037735849057	1.83523096942095	1.08624071270889	0.223962764223197	0.565320062200259	0.499231613312466	SNRPD3/LSM4/PRPF8	3
GO:0035094	response to nicotine	3/580	53/18805	0.0566037735849057	1.83523096942095	1.08624071270889	0.223962764223197	0.565320062200259	0.499231613312466	IGF1R/ABAT/TNF	3
GO:0060688	regulation of morphogenesis of a branching structure	3/580	53/18805	0.0566037735849057	1.83523096942095	1.08624071270889	0.223962764223197	0.565320062200259	0.499231613312466	ESR1/HOXB7/TNF	3
GO:0170038	proteinogenic amino acid biosynthetic process	3/580	53/18805	0.0566037735849057	1.83523096942095	1.08624071270889	0.223962764223197	0.565320062200259	0.499231613312466	MRI1/SERINC5/GLS	3
GO:1904707	positive regulation of vascular associated smooth muscle cell proliferation	3/580	53/18805	0.0566037735849057	1.83523096942095	1.08624071270889	0.223962764223197	0.565320062200259	0.499231613312466	FRS2/IGFBP5/TNF	3
GO:2000573	positive regulation of DNA biosynthetic process	3/580	53/18805	0.0566037735849057	1.83523096942095	1.08624071270889	0.223962764223197	0.565320062200259	0.499231613312466	HNRNPA1/NEK7/TNF	3
GO:0006650	glycerophospholipid metabolic process	12/580	302/18805	0.0397350993377483	1.28830783283855	0.901040242957542	0.224320583799689	0.565320062200259	0.499231613312466	MBOAT1/SERINC5/PIP4K2B/IMPA2/OCRL/FAR1/PIGN/MFSD2A/PIK3C2G/GPCPD1/DHRS7B/PIK3R1	12
GO:0001773	myeloid dendritic cell activation	2/580	29/18805	0.0689655172413793	2.23602853745541	1.18831425807289	0.224802768385256	0.565320062200259	0.499231613312466	PYCARD/ITGB6	2
GO:0006656	phosphatidylcholine biosynthetic process	2/580	29/18805	0.0689655172413793	2.23602853745541	1.18831425807289	0.224802768385256	0.565320062200259	0.499231613312466	MFSD2A/DHRS7B	2
GO:0010039	response to iron ion	2/580	29/18805	0.0689655172413793	2.23602853745541	1.18831425807289	0.224802768385256	0.565320062200259	0.499231613312466	TFF1/ABAT	2
GO:0021854	hypothalamus development	2/580	29/18805	0.0689655172413793	2.23602853745541	1.18831425807289	0.224802768385256	0.565320062200259	0.499231613312466	SEMA3E/BLOC1S6	2
GO:0031281	positive regulation of cyclase activity	2/580	29/18805	0.0689655172413793	2.23602853745541	1.18831425807289	0.224802768385256	0.565320062200259	0.499231613312466	CAP2/RAF1	2
GO:0031952	regulation of protein autophosphorylation	2/580	29/18805	0.0689655172413793	2.23602853745541	1.18831425807289	0.224802768385256	0.565320062200259	0.499231613312466	CALM2/MOB1B	2
GO:0042634	regulation of hair cycle	2/580	29/18805	0.0689655172413793	2.23602853745541	1.18831425807289	0.224802768385256	0.565320062200259	0.499231613312466	MSX2/TNF	2
GO:0045742	positive regulation of epidermal growth factor receptor signaling pathway	2/580	29/18805	0.0689655172413793	2.23602853745541	1.18831425807289	0.224802768385256	0.565320062200259	0.499231613312466	AGR2/NUP62	2
GO:0045830	positive regulation of isotype switching	2/580	29/18805	0.0689655172413793	2.23602853745541	1.18831425807289	0.224802768385256	0.565320062200259	0.499231613312466	HMCES/EXOSC6	2
GO:0045948	positive regulation of translational initiation	2/580	29/18805	0.0689655172413793	2.23602853745541	1.18831425807289	0.224802768385256	0.565320062200259	0.499231613312466	YTHDF3/TNF	2
GO:0045980	negative regulation of nucleotide metabolic process	2/580	29/18805	0.0689655172413793	2.23602853745541	1.18831425807289	0.224802768385256	0.565320062200259	0.499231613312466	IER3/PPP2CA	2
GO:0051349	positive regulation of lyase activity	2/580	29/18805	0.0689655172413793	2.23602853745541	1.18831425807289	0.224802768385256	0.565320062200259	0.499231613312466	CAP2/RAF1	2
GO:0060142	regulation of syncytium formation by plasma membrane fusion	2/580	29/18805	0.0689655172413793	2.23602853745541	1.18831425807289	0.224802768385256	0.565320062200259	0.499231613312466	GDF15/EHD1	2
GO:0061744	motor behavior	2/580	29/18805	0.0689655172413793	2.23602853745541	1.18831425807289	0.224802768385256	0.565320062200259	0.499231613312466	MFSD2A/EXT1	2
GO:0070935	3'-UTR-mediated mRNA stabilization	2/580	29/18805	0.0689655172413793	2.23602853745541	1.18831425807289	0.224802768385256	0.565320062200259	0.499231613312466	ZFP36/RBM24	2
GO:0070977	bone maturation	2/580	29/18805	0.0689655172413793	2.23602853745541	1.18831425807289	0.224802768385256	0.565320062200259	0.499231613312466	LTF/EXT1	2
GO:0090594	inflammatory response to wounding	2/580	29/18805	0.0689655172413793	2.23602853745541	1.18831425807289	0.224802768385256	0.565320062200259	0.499231613312466	NFKBIZ/TNF	2
GO:1901380	negative regulation of potassium ion transmembrane transport	2/580	29/18805	0.0689655172413793	2.23602853745541	1.18831425807289	0.224802768385256	0.565320062200259	0.499231613312466	KCNE4/STK39	2
GO:1904036	negative regulation of epithelial cell apoptotic process	2/580	29/18805	0.0689655172413793	2.23602853745541	1.18831425807289	0.224802768385256	0.565320062200259	0.499231613312466	IGF1R/YAP1	2
GO:1904358	positive regulation of telomere maintenance via telomere lengthening	2/580	29/18805	0.0689655172413793	2.23602853745541	1.18831425807289	0.224802768385256	0.565320062200259	0.499231613312466	HNRNPA1/NEK7	2
GO:0016525	negative regulation of angiogenesis	7/580	160/18805	0.04375	1.41848060344828	0.948329979922151	0.225234066927134	0.565622463060285	0.499498662156672	KLF4/GADD45A/PLK2/KLF2/SEMA3E/TNF/SLC12A2	7
GO:0031345	negative regulation of cell projection organization	8/580	188/18805	0.0425531914893617	1.37967718268525	0.933348691798295	0.225414118119966	0.565622463060285	0.499498662156672	CERS2/EFNA1/PFN2/PMP22/NFATC4/DAB1/YAP1/PPP3CA	8
GO:0071772	response to BMP	8/580	188/18805	0.0425531914893617	1.37967718268525	0.933348691798295	0.225414118119966	0.565622463060285	0.499498662156672	SPINT2/TFAP2B/LEF1/MSX2/GPC3/TGFBR3/EXT1/BMPR1B	8
GO:0071773	cellular response to BMP stimulus	8/580	188/18805	0.0425531914893617	1.37967718268525	0.933348691798295	0.225414118119966	0.565622463060285	0.499498662156672	SPINT2/TFAP2B/LEF1/MSX2/GPC3/TGFBR3/EXT1/BMPR1B	8
GO:0009743	response to carbohydrate	10/580	245/18805	0.0408163265306122	1.32336382828994	0.908847137243116	0.226318158340402	0.56723422411378	0.500922001119523	IGF1R/MPC2/VAMP2/GCLC/ENDOG/RAF1/MAP1B/TNF/PPP3CA/MAP2K3	10
GO:0015849	organic acid transport	14/580	361/18805	0.038781163434903	1.2573789282644	0.880854914778069	0.226729458047398	0.56723422411378	0.500922001119523	ARL6IP1/SLC38A2/MPC2/ABAT/CRABP1/SLC19A2/SERINC5/RGS2/SLC27A2/SLC46A1/SLC43A1/MFSD2A/TNF/SLC12A2	14
GO:0031397	negative regulation of protein ubiquitination	4/580	79/18805	0.0506329113924051	1.6416412047141	1.01950328909054	0.226795190105835	0.56723422411378	0.500922001119523	HSPA1A/BEX3/GCLC/HSPA1B	4
GO:0051145	smooth muscle cell differentiation	4/580	79/18805	0.0506329113924051	1.6416412047141	1.01950328909054	0.226795190105835	0.56723422411378	0.500922001119523	ADM/MESP1/NFATC4/NPNT	4
GO:0120192	tight junction assembly	4/580	79/18805	0.0506329113924051	1.6416412047141	1.01950328909054	0.226795190105835	0.56723422411378	0.500922001119523	SNAI1/RAB13/CLDN7/TNF	4
GO:1901568	fatty acid derivative metabolic process	4/580	79/18805	0.0506329113924051	1.6416412047141	1.01950328909054	0.226795190105835	0.56723422411378	0.500922001119523	ELOVL5/PAM/SLC27A2/FAR1	4
GO:0048511	rhythmic process	12/580	303/18805	0.0396039603960396	1.28405599180608	0.889244689094653	0.227565455879736	0.568851901919665	0.502350565139892	PGR/ESR1/KLF10/IGF1R/ROBO2/PPP1CB/BLOC1S6/TNF/EGR3/FXR1/BMPR1B/NRIP1	12
GO:0010595	positive regulation of endothelial cell migration	6/580	133/18805	0.0451127819548872	1.4626652838994	0.955218366110058	0.228207021569963	0.570146284367039	0.503493628478084	PDCD6/PLK2/BCAS3/FOXP1/TGFBR3/MAP2K3	6
GO:0002027	regulation of heart rate	5/580	106/18805	0.0471698113207547	1.52935914118412	0.974988534125541	0.229341397425616	0.572359598017234	0.505448195843079	CALM2/JUP/KCNE4/ADM/TNF	5
GO:0002312	B cell activation involved in immune response	5/580	106/18805	0.0471698113207547	1.52935914118412	0.974988534125541	0.229341397425616	0.572359598017234	0.505448195843079	BCL6/HMCES/EXOSC6/LGALS1/NFKBIZ	5
GO:0045930	negative regulation of mitotic cell cycle	10/580	246/18805	0.040650406504065	1.31798430053266	0.895573626780623	0.229950681258137	0.573259084716579	0.506242528516006	KLF4/RBL2/BCL6/IER3/TEX14/OVOL1/CDKN1C/MAD2L1BP/TNF/CDKN2B	10
GO:0071219	cellular response to molecule of bacterial origin	10/580	246/18805	0.040650406504065	1.31798430053266	0.895573626780623	0.229950681258137	0.573259084716579	0.506242528516006	PRDX2/ZFP36/LDOC1/PYCARD/LTF/PRPF8/CXCL8/NFKBIZ/TNF/MAP2K3	10
GO:0048762	mesenchymal cell differentiation	11/580	275/18805	0.04	1.29689655172414	0.884787829893842	0.230715308980898	0.574854206855055	0.507651173727575	PDCD6/EFNA1/SNAI1/EPB41L5/LEF1/PPP2CA/MSX2/SEMA3E/POFUT2/TGFBR3/EXT1	11
GO:0042304	regulation of fatty acid biosynthetic process	3/580	54/18805	0.0555555555555556	1.80124521072797	1.0518539911656	0.232151874432875	0.577184935516597	0.509709429762866	ELOVL5/MID1IP1/EIF6	3
GO:0070169	positive regulation of biomineral tissue development	3/580	54/18805	0.0555555555555556	1.80124521072797	1.0518539911656	0.232151874432875	0.577184935516597	0.509709429762866	CEBPB/LTF/BMPR1B	3
GO:0071320	cellular response to cAMP	3/580	54/18805	0.0555555555555556	1.80124521072797	1.0518539911656	0.232151874432875	0.577184935516597	0.509709429762866	IGFBP5/CRTC3/ITPR2	3
GO:2000772	regulation of cellular senescence	3/580	54/18805	0.0555555555555556	1.80124521072797	1.0518539911656	0.232151874432875	0.577184935516597	0.509709429762866	BCL6/PLK2/EEF1E1	3
GO:0030512	negative regulation of transforming growth factor beta receptor signaling pathway	6/580	134/18805	0.0447761194029851	1.45174987133299	0.936207243111458	0.23323405070729	0.579089162596885	0.511391044163221	FKBP1A/GDF15/HSPA1A/SAP30/TGFBR3/PMEPA1	6
GO:0002437	inflammatory response to antigenic stimulus	4/580	80/18805	0.05	1.62112068965517	0.993151323701377	0.23342057194322	0.579089162596885	0.511391044163221	PLK2/PSMA1/TNF/EXT1	4
GO:0045069	regulation of viral genome replication	4/580	80/18805	0.05	1.62112068965517	0.993151323701377	0.23342057194322	0.579089162596885	0.511391044163221	MX1/LTF/CXCL8/TNF	4
GO:0072088	nephron epithelium morphogenesis	4/580	80/18805	0.05	1.62112068965517	0.993151323701377	0.23342057194322	0.579089162596885	0.511391044163221	MYC/GPC3/HOXB7/NPNT	4
GO:1902600	proton transmembrane transport	8/580	190/18805	0.0421052631578947	1.36515426497278	0.902458016837555	0.233765915499026	0.579633785093657	0.511871997849265	ATP5MF/COX8A/ATP5MG/NDUFC2/ATP5PO/NNT/NDUFB8/SLC46A1	8
GO:0051494	negative regulation of cytoskeleton organization	7/580	162/18805	0.0432098765432099	1.40096849723286	0.91435577016617	0.234322419748216	0.580388918161307	0.512538852476998	SPTAN1/ADD3/MID1IP1/PFN2/KAT2A/MAP1B/PIK3R1	7
GO:2000181	negative regulation of blood vessel morphogenesis	7/580	162/18805	0.0432098765432099	1.40096849723286	0.91435577016617	0.234322419748216	0.580388918161307	0.512538852476998	KLF4/GADD45A/PLK2/KLF2/SEMA3E/TNF/SLC12A2	7
[truncated: 2,747 more rows]
