# Supplementary material
Source: Research Square preprint supplement (doi:10.21203/rs.3.rs-9551458/v1)
Supplement: Supplementary file 3 [file 4a580f2605bd36d3ba9d7c2c.xlsx]

## Sheet: Sheet1
Table S1. Sample Information
Sample No.	Reportname	Sample	Sampling tissue	Disease Type	SeqType	DataSource
1	PT_1	PT	乳腺原发灶	未转移乳腺癌	scRNA-seq	In-house
2	PT_2	PT	乳腺原发灶	未转移乳腺癌	scRNA-seq	In-house
3	BM_1	BM	乳腺原发灶	骨转移乳腺癌	scRNA-seq	In-house
4	BM_2	BM	乳腺原发灶	骨转移乳腺癌	scRNA-seq	In-house
5	BM_3	BM_Lym	腋窝淋巴结	骨转移乳腺癌	scRNA-seq	In-house
6	LyM_1	LyM	乳腺原发灶	淋巴结转移乳腺癌	scRNA-seq	GSE180286
7	LyM_2	LyM	乳腺原发灶	淋巴结转移乳腺癌	scRNA-seq	GSE180286
8	LyM_3	LyM	乳腺原发灶	淋巴结转移乳腺癌	scRNA-seq	GSE180286
9	LyM_4	LyM	乳腺原发灶	淋巴结转移乳腺癌	scRNA-seq	GSE180286
