# Supplementary material
Source: Research Square preprint supplement (doi:10.21203/rs.3.rs-9551458/v1)
Supplement: Supplementary file 4 [file 914027d19f26e63ca3c10743.xlsx]

## Sheet: LyM_PT
Differentially expressed genes in malignant cells from different sources
	p_val	avg_log2FC	pct.1	pct.2	p_val_adj	gene	log_pval	comparison_group
PLEKHA7	0	-7.48833	0.018	0.947	0	PLEKHA7	Inf	LyM vs PT
AMBRA1	0	-7.73096	0.015	0.943	0	AMBRA1	Inf	LyM vs PT
AC010894.3	0	-8.13252	0.005	0.898	0	AC010894.3	Inf	LyM vs PT
CALM2	0	16.7759897241125	0.879	0	0	CALM2	Inf	LyM vs PT
FAM153C	0	-11.8171	0	0.837	0	FAM153C	Inf	LyM vs PT
ANKRD30A	0	-7.53061	0.004	0.83	0	ANKRD30A	Inf	LyM vs PT
COX6A1	0	12.0610649527557	0.797	0.002	0	COX6A1	Inf	LyM vs PT
NBEAL1	0	-3.93656	0.084	0.849	0	NBEAL1	Inf	LyM vs PT
RPS26	0	6.25351056415814	0.866	0.106	0	RPS26	Inf	LyM vs PT
MAMDC2	0	-7.96316	0.003	0.757	0	MAMDC2	Inf	LyM vs PT
MECOM	0	-5.5421	0.013	0.766	0	MECOM	Inf	LyM vs PT
ATP5MF	0	15.5290115655469	0.738	0	0	ATP5MF	Inf	LyM vs PT
UQCR11	0	15.5985323420355	0.737	0	0	UQCR11	Inf	LyM vs PT
RPL21	0	6.66221777918872	0.856	0.131	0	RPL21	Inf	LyM vs PT
HSPE1	0	6.66117710259234	0.778	0.058	0	HSPE1	Inf	LyM vs PT
RPL22	0	6.38176590732114	0.771	0.058	0	RPL22	Inf	LyM vs PT
CHCHD3	0	-3.30044	0.12	0.832	0	CHCHD3	Inf	LyM vs PT
COX8A	0	15.4236268692469	0.698	0	0	COX8A	Inf	LyM vs PT
AL136454.1	0	-5.95538	0.012	0.706	0	AL136454.1	Inf	LyM vs PT
PGR	0	-4.27368	0.071	0.76	0	PGR	Inf	LyM vs PT
IL6ST	0	-3.2445	0.136	0.825	0	IL6ST	Inf	LyM vs PT
CDK12	0	-3.17349	0.16	0.838	0	CDK12	Inf	LyM vs PT
EFHD1	0	-2.96109	0.122	0.798	0	EFHD1	Inf	LyM vs PT
PRSS23	0	-7.12571	0.009	0.683	0	PRSS23	Inf	LyM vs PT
TRAF4	0	-3.5264	0.117	0.787	0	TRAF4	Inf	LyM vs PT
ARPC3	0	8.34519279856609	0.668	0.006	0	ARPC3	Inf	LyM vs PT
IER5	0	-3.38043	0.151	0.807	0	IER5	Inf	LyM vs PT
CEBPB	0	-3.56795	0.21	0.864	0	CEBPB	Inf	LyM vs PT
RPL26	0	15.0153887462888	0.648	0	0	RPL26	Inf	LyM vs PT
SPINT2	0	5.23724732828503	0.752	0.104	0	SPINT2	Inf	LyM vs PT
PRDX2	0	15.1377088004177	0.644	0	0	PRDX2	Inf	LyM vs PT
TXNRD1	0	-2.47125	0.225	0.869	0	TXNRD1	Inf	LyM vs PT
FAM172A	0	-2.38039	0.164	0.804	0	FAM172A	Inf	LyM vs PT
SPTSSA	0	15.7464305658595	0.639	0	0	SPTSSA	Inf	LyM vs PT
FXYD3	0	15.0171543880989	0.633	0	0	FXYD3	Inf	LyM vs PT
FRS2	0	-3.97705	0.055	0.676	0	FRS2	Inf	LyM vs PT
TSTD1	0	14.9411533549744	0.618	0	0	TSTD1	Inf	LyM vs PT
KLF4	0	-3.49696	0.107	0.724	0	KLF4	Inf	LyM vs PT
IGFBP4	0	-3.46074	0.11	0.723	0	IGFBP4	Inf	LyM vs PT
STARD3	0	-3.77795	0.061	0.673	0	STARD3	Inf	LyM vs PT
PDCD6	0	15.5475011917817	0.611	0	0	PDCD6	Inf	LyM vs PT
TFF3	0	-4.85445	0.247	0.858	0	TFF3	Inf	LyM vs PT
CST3	0	-1.779	0.341	0.95	0	CST3	Inf	LyM vs PT
JUND	0	-3.52207	0.299	0.904	0	JUND	Inf	LyM vs PT
TINCR	0	-3.01786	0.064	0.669	0	TINCR	Inf	LyM vs PT
GSTM3	0	-3.14269	0.116	0.72	0	GSTM3	Inf	LyM vs PT
WDR83OS	0	14.7394810714746	0.602	0	0	WDR83OS	Inf	LyM vs PT
IGFBP2	0	-2.87963	0.212	0.81	0	IGFBP2	Inf	LyM vs PT
OAZ1	0	14.7230106604057	0.598	0	0	OAZ1	Inf	LyM vs PT
EPHX1	0	-2.63983	0.134	0.731	0	EPHX1	Inf	LyM vs PT
LASP1	0	-2.52792	0.116	0.711	0	LASP1	Inf	LyM vs PT
CD81	0	-1.95179	0.243	0.837	0	CD81	Inf	LyM vs PT
ZNF652	0	-2.23392	0.173	0.766	0	ZNF652	Inf	LyM vs PT
ATP5MG	0	14.6804250698926	0.588	0	0	ATP5MG	Inf	LyM vs PT
ACLY	0	-2.62381	0.09	0.676	0	ACLY	Inf	LyM vs PT
TPBG	0	-2.83952	0.11	0.696	0	TPBG	Inf	LyM vs PT
H1FX	0	-2.21468	0.27	0.855	0	H1FX	Inf	LyM vs PT
SNHG6	0	-1.54683	0.208	0.79	0	SNHG6	Inf	LyM vs PT
GREB1	0	-6.40972	0.007	0.589	0	GREB1	Inf	LyM vs PT
PMAIP1	0	-3.099	0.124	0.706	0	PMAIP1	Inf	LyM vs PT
RPL7	0	4.56960045995584	0.878	0.298	0	RPL7	Inf	LyM vs PT
RERG	0	-2.56677	0.14	0.72	0	RERG	Inf	LyM vs PT
MYC	0	-2.48183	0.133	0.712	0	MYC	Inf	LyM vs PT
JTB	0	14.6261480957962	0.578	0	0	JTB	Inf	LyM vs PT
HIST3H2A	0	-3.05667	0.066	0.642	0	HIST3H2A	Inf	LyM vs PT
RPL9	0	4.70855863429275	0.809	0.234	0	RPL9	Inf	LyM vs PT
GRB14	0	-8.11234	0.005	0.579	0	GRB14	Inf	LyM vs PT
SNRPD3	0	14.6032132732344	0.574	0	0	SNRPD3	Inf	LyM vs PT
FOXA1	0	-1.7598	0.22	0.788	0	FOXA1	Inf	LyM vs PT
COPRS	0	-1.9984	0.25	0.818	0	COPRS	Inf	LyM vs PT
ELOVL5	0	-2.43042	0.2	0.762	0	ELOVL5	Inf	LyM vs PT
ESR1	0	-2.1147	0.199	0.76	0	ESR1	Inf	LyM vs PT
ZFP36	0	-3.09879	0.223	0.782	0	ZFP36	Inf	LyM vs PT
TSC22D3	0	-2.20686	0.241	0.796	0	TSC22D3	Inf	LyM vs PT
TFF1	0	-7.27362	0.146	0.698	0	TFF1	Inf	LyM vs PT
HNRNPA1	0	14.5174374435175	0.55	0	0	HNRNPA1	Inf	LyM vs PT
JUP	0	-2.25695	0.33	0.88	0	JUP	Inf	LyM vs PT
DDX3X	0	-1.81743	0.176	0.725	0	DDX3X	Inf	LyM vs PT
HIST2H2BE	0	-2.02009	0.185	0.732	0	HIST2H2BE	Inf	LyM vs PT
SLC37A1	0	-4.76987	0.03	0.577	0	SLC37A1	Inf	LyM vs PT
CISD3	0	-1.82082	0.288	0.833	0	CISD3	Inf	LyM vs PT
HEXIM1	0	-3.32455	0.096	0.639	0	HEXIM1	Inf	LyM vs PT
MED1	0	-2.2189	0.148	0.691	0	MED1	Inf	LyM vs PT
BLVRA	0	-1.963	0.186	0.728	0	BLVRA	Inf	LyM vs PT
MCL1	0	-2.06435	0.176	0.718	0	MCL1	Inf	LyM vs PT
BAG3	0	-3.41076	0.081	0.622	0	BAG3	Inf	LyM vs PT
SNHG5	0	-3.17155	0.174	0.715	0	SNHG5	Inf	LyM vs PT
NDUFC2	0	14.5479303566905	0.539	0	0	NDUFC2	Inf	LyM vs PT
TMEM99	0	-2.19126	0.137	0.675	0	TMEM99	Inf	LyM vs PT
UGDH	0	-3.50184	0.074	0.609	0	UGDH	Inf	LyM vs PT
NDUFA11	0	14.4648992991657	0.534	0	0	NDUFA11	Inf	LyM vs PT
GNG5	0	14.4688280435755	0.533	0	0	GNG5	Inf	LyM vs PT
ARL6IP1	0	15.2853326417862	0.531	0	0	ARL6IP1	Inf	LyM vs PT
ERAL1	0	-2.61073	0.094	0.622	0	ERAL1	Inf	LyM vs PT
SLC38A2	0	-2.13654	0.141	0.667	0	SLC38A2	Inf	LyM vs PT
SPTAN1	0	-2.68251	0.075	0.601	0	SPTAN1	Inf	LyM vs PT
SNHG9	0	-1.74119	0.199	0.724	0	SNHG9	Inf	LyM vs PT
AC138123.1	0	-9.05803	0	0.523	0	AC138123.1	Inf	LyM vs PT
NDUFA13	0	11.5391827753894	0.523	0.001	0	NDUFA13	Inf	LyM vs PT
SIVA1	0	-1.71952	0.272	0.793	0	SIVA1	Inf	LyM vs PT
LINC00910	0	-6.74213	0.006	0.525	0	LINC00910	Inf	LyM vs PT
LSM4	0	-2.18675	0.281	0.799	0	LSM4	Inf	LyM vs PT
PDIA4	0	-2.0731	0.283	0.801	0	PDIA4	Inf	LyM vs PT
TMEM14C	0	-1.63897	0.232	0.749	0	TMEM14C	Inf	LyM vs PT
GRSF1	0	-2.15922	0.177	0.693	0	GRSF1	Inf	LyM vs PT
CEBPD	0	-2.76362	0.234	0.749	0	CEBPD	Inf	LyM vs PT
S100A7	0	8.06193926136251	0.538	0.023	0	S100A7	Inf	LyM vs PT
BAIAP2L1	0	-2.29419	0.095	0.608	0	BAIAP2L1	Inf	LyM vs PT
CYR61	0	-3.91209	0.087	0.599	0	CYR61	Inf	LyM vs PT
IER5L	0	-2.40823	0.131	0.643	0	IER5L	Inf	LyM vs PT
SDCBP	0	-1.95979	0.159	0.671	0	SDCBP	Inf	LyM vs PT
CERS2	0	-2.07863	0.122	0.632	0	CERS2	Inf	LyM vs PT
TMEM123	0	-1.51888	0.269	0.778	0	TMEM123	Inf	LyM vs PT
FKBP1A	0	14.2975887175554	0.508	0	0	FKBP1A	Inf	LyM vs PT
EFNA1	0	-2.30763	0.174	0.679	0	EFNA1	Inf	LyM vs PT
PRCP	0	-3.83277	0.118	0.623	0	PRCP	Inf	LyM vs PT
HSPB8	0	-3.08094	0.07	0.574	0	HSPB8	Inf	LyM vs PT
KLF10	0	-2.80118	0.118	0.621	0	KLF10	Inf	LyM vs PT
BRD2	0	-2.27954	0.314	0.817	0	BRD2	Inf	LyM vs PT
KLHDC2	0	-1.8409	0.193	0.696	0	KLHDC2	Inf	LyM vs PT
ACTR10	0	-1.87058	0.222	0.723	0	ACTR10	Inf	LyM vs PT
AZIN1	0	-1.67762	0.21	0.71	0	AZIN1	Inf	LyM vs PT
MT1X	0	15.8966916310563	0.497	0	0	MT1X	Inf	LyM vs PT
ZNF217	0	-2.03639	0.144	0.641	0	ZNF217	Inf	LyM vs PT
G3BP2	0	-2.22528	0.201	0.698	0	G3BP2	Inf	LyM vs PT
TMEM205	0	14.3333828053154	0.493	0	0	TMEM205	Inf	LyM vs PT
GDI1	0	-1.51088	0.179	0.671	0	GDI1	Inf	LyM vs PT
LAMP2	0	-1.51949	0.303	0.795	0	LAMP2	Inf	LyM vs PT
IGFBP5	0	-3.96953	0.122	0.614	0	IGFBP5	Inf	LyM vs PT
DUSP5	0	-4.41992	0.037	0.528	0	DUSP5	Inf	LyM vs PT
PCGF2	0	-2.95526	0.056	0.547	0	PCGF2	Inf	LyM vs PT
NAPA	0	-3.96208	0.026	0.515	0	NAPA	Inf	LyM vs PT
PPP1R15A	0	-2.33127	0.182	0.67	0	PPP1R15A	Inf	LyM vs PT
FOSB	0	-2.57454	0.128	0.615	0	FOSB	Inf	LyM vs PT
TIMM9	0	-1.90866	0.135	0.621	0	TIMM9	Inf	LyM vs PT
MAPRE1	0	-1.76767	0.134	0.618	0	MAPRE1	Inf	LyM vs PT
RBL2	0	-2.13743	0.099	0.583	0	RBL2	Inf	LyM vs PT
RASD1	0	-3.67003	0.113	0.596	0	RASD1	Inf	LyM vs PT
SLC50A1	0	-1.56674	0.189	0.671	0	SLC50A1	Inf	LyM vs PT
H1F0	0	-1.84834	0.342	0.824	0	H1F0	Inf	LyM vs PT
CCNL2	0	-2.1816	0.089	0.57	0	CCNL2	Inf	LyM vs PT
HNRNPA1P48	0	-2.61481	0.057	0.537	0	HNRNPA1P48	Inf	LyM vs PT
PSMA5	0	-1.65179	0.191	0.671	0	PSMA5	Inf	LyM vs PT
SDF2	0	-1.43457	0.183	0.663	0	SDF2	Inf	LyM vs PT
TTC39A	0	-2.55388	0.089	0.569	0	TTC39A	Inf	LyM vs PT
BHLHE40	0	-1.74182	0.238	0.717	0	BHLHE40	Inf	LyM vs PT
TSPAN15	0	-2.01063	0.095	0.574	0	TSPAN15	Inf	LyM vs PT
STARD10	0	14.5015159609678	0.477	0	0	STARD10	Inf	LyM vs PT
MARCKSL1	0	-1.92497	0.403	0.878	0	MARCKSL1	Inf	LyM vs PT
NUDC	0	-1.39606	0.214	0.687	0	NUDC	Inf	LyM vs PT
BRI3	0	-1.33569	0.174	0.647	0	BRI3	Inf	LyM vs PT
CWC25	0	-1.6884	0.192	0.665	0	CWC25	Inf	LyM vs PT
OAT	0	-1.71501	0.206	0.678	0	OAT	Inf	LyM vs PT
OGDH	0	-2.89652	0.046	0.518	0	OGDH	Inf	LyM vs PT
PYDC1	0	-14.5835	0	0.472	0	PYDC1	Inf	LyM vs PT
DAP3	0	-1.26065	0.216	0.687	0	DAP3	Inf	LyM vs PT
SLC25A39	0	-1.3139	0.295	0.766	0	SLC25A39	Inf	LyM vs PT
SUMO2	0	3.81518054669814	0.771	0.3	0	SUMO2	Inf	LyM vs PT
SHROOM3	0	-3.51735	0.037	0.507	0	SHROOM3	Inf	LyM vs PT
CITED2	0	-1.76922	0.245	0.714	0	CITED2	Inf	LyM vs PT
GADD45A	0	-2.4564	0.1	0.569	0	GADD45A	Inf	LyM vs PT
CHMP4B	0	-1.19304	0.291	0.758	0	CHMP4B	Inf	LyM vs PT
MLLT6	0	-2.28776	0.081	0.548	0	MLLT6	Inf	LyM vs PT
SPIDR	0	-3.27733	0.049	0.516	0	SPIDR	Inf	LyM vs PT
CLTC	0	-1.29035	0.268	0.734	0	CLTC	Inf	LyM vs PT
CMPK1	0	-1.98182	0.102	0.568	0	CMPK1	Inf	LyM vs PT
CITED4	0	-4.3547	0.023	0.488	0	CITED4	Inf	LyM vs PT
MINOS1	0	6.28113309264174	0.483	0.018	0	MINOS1	Inf	LyM vs PT
MRI1	0	-3.48131	0.04	0.504	0	MRI1	Inf	LyM vs PT
GNAI3	0	-1.86237	0.113	0.577	0	GNAI3	Inf	LyM vs PT
MANF	0	-1.97189	0.131	0.595	0	MANF	Inf	LyM vs PT
ADD3	0	-2.19313	0.097	0.56	0	ADD3	Inf	LyM vs PT
CHD4	0	8.67507040079132	0.467	0.004	0	CHD4	Inf	LyM vs PT
AC242426.2	0	-5.60778	0.006	0.469	0	AC242426.2	Inf	LyM vs PT
DPM3	0	-1.65192	0.152	0.614	0	DPM3	Inf	LyM vs PT
ELF2	0	-1.13129	0.251	0.712	0	ELF2	Inf	LyM vs PT
NONO	0	-1.09884	0.264	0.725	0	NONO	Inf	LyM vs PT
METRN	0	-1.01627	0.256	0.715	0	METRN	Inf	LyM vs PT
PSMD4	0	-1.09423	0.285	0.743	0	PSMD4	Inf	LyM vs PT
POLDIP2	0	-1.49064	0.163	0.62	0	POLDIP2	Inf	LyM vs PT
PSMA3	0	-1.52043	0.401	0.858	0	PSMA3	Inf	LyM vs PT
PSMB3	0	-2.79867	0.485	0.942	0	PSMB3	Inf	LyM vs PT
LDOC1	0	-2.11426	0.095	0.551	0	LDOC1	Inf	LyM vs PT
AHNAK	0	-1.91214	0.342	0.798	0	AHNAK	Inf	LyM vs PT
KIAA1324	0	-1.82046	0.293	0.749	0	KIAA1324	Inf	LyM vs PT
YKT6	0	-2.39638	0.068	0.524	0	YKT6	Inf	LyM vs PT
TGIF1	0	-2.11067	0.132	0.588	0	TGIF1	Inf	LyM vs PT
NEDD8	0	13.9883375403132	0.455	0	0	NEDD8	Inf	LyM vs PT
ADAR	0	-1.43971	0.159	0.614	0	ADAR	Inf	LyM vs PT
MAL2	0	-1.15436	0.281	0.736	0	MAL2	Inf	LyM vs PT
DDT	0	14.1106440160814	0.454	0	0	DDT	Inf	LyM vs PT
CRTC3	0	-3.35805	0.027	0.481	0	CRTC3	Inf	LyM vs PT
SCCPDH	0	-2.31361	0.257	0.711	0	SCCPDH	Inf	LyM vs PT
RAMP1	0	-2.37696	0.097	0.55	0	RAMP1	Inf	LyM vs PT
AKT1	0	-1.90183	0.078	0.531	0	AKT1	Inf	LyM vs PT
SNAI1	0	-7.95798	0.003	0.456	0	SNAI1	Inf	LyM vs PT
SURF4	0	-1.16239	0.189	0.642	0	SURF4	Inf	LyM vs PT
PYCARD	0	-2.16437	0.162	0.615	0	PYCARD	Inf	LyM vs PT
PRDX6	0	-1.1635	0.317	0.769	0	PRDX6	Inf	LyM vs PT
BCAP31	0	-1.29666	0.398	0.849	0	BCAP31	Inf	LyM vs PT
SF3B4	0	-1.1996	0.211	0.661	0	SF3B4	Inf	LyM vs PT
FKBP2	0	7.4738103439135	0.46	0.01	0	FKBP2	Inf	LyM vs PT
CCT8	0	-1.24376	0.26	0.71	0	CCT8	Inf	LyM vs PT
GNB1	0	-0.94264	0.277	0.727	0	GNB1	Inf	LyM vs PT
MZT2A	0	-1.09377	0.374	0.824	0	MZT2A	Inf	LyM vs PT
SDC4	0	-1.29868	0.229	0.678	0	SDC4	Inf	LyM vs PT
KIAA0100	0	-2.20876	0.074	0.523	0	KIAA0100	Inf	LyM vs PT
SF1	0	-1.46515	0.154	0.603	0	SF1	Inf	LyM vs PT
RNF187	0	-1.76376	0.091	0.539	0	RNF187	Inf	LyM vs PT
PSMA2	0	13.9602468426359	0.448	0	0	PSMA2	Inf	LyM vs PT
FUNDC2	0	-1.72103	0.136	0.584	0	FUNDC2	Inf	LyM vs PT
TKT	0	-1.15534	0.244	0.692	0	TKT	Inf	LyM vs PT
EIF3E	0	-0.719336	0.267	0.714	0	EIF3E	Inf	LyM vs PT
PTBP3	0	-1.01492	0.292	0.738	0	PTBP3	Inf	LyM vs PT
ATP2A2	0	-1.58168	0.147	0.593	0	ATP2A2	Inf	LyM vs PT
KCNE4	0	-6.62551	0.006	0.45	0	KCNE4	Inf	LyM vs PT
GAREM1	0	-3.07521	0.034	0.476	0	GAREM1	Inf	LyM vs PT
ATP5PO	0	13.9595733582547	0.441	0	0	ATP5PO	Inf	LyM vs PT
SERPINA1	0	-6.32094	0.016	0.457	0	SERPINA1	Inf	LyM vs PT
ELP2	0	-2.41773	0.12	0.56	0	ELP2	Inf	LyM vs PT
HIST1H3J	0	-8.75498	0.001	0.441	0	HIST1H3J	Inf	LyM vs PT
HOXB2	0	-1.83422	0.131	0.571	0	HOXB2	Inf	LyM vs PT
BCL6	0	-3.24737	0.041	0.48	0	BCL6	Inf	LyM vs PT
EPB41L5	0	-2.272	0.073	0.511	0	EPB41L5	Inf	LyM vs PT
GAS5	0	-0.935192	0.332	0.77	0	GAS5	Inf	LyM vs PT
LSAMP	0	-6.83411	0.003	0.441	0	LSAMP	Inf	LyM vs PT
FAM222B	0	-2.42448	0.067	0.504	0	FAM222B	Inf	LyM vs PT
MYOF	0	-1.56671	0.152	0.589	0	MYOF	Inf	LyM vs PT
IDI1	0	-1.55573	0.19	0.626	0	IDI1	Inf	LyM vs PT
HNRNPF	0	-1.13013	0.359	0.794	0	HNRNPF	Inf	LyM vs PT
CSDE1	0	-1.24473	0.418	0.853	0	CSDE1	Inf	LyM vs PT
GNGT1	0	-4.44898	0.021	0.456	0	GNGT1	Inf	LyM vs PT
UBE2V2	0	-1.39763	0.307	0.742	0	UBE2V2	Inf	LyM vs PT
SSR1	0	-0.96903	0.254	0.689	0	SSR1	Inf	LyM vs PT
AHCYL1	0	-1.30179	0.179	0.613	0	AHCYL1	Inf	LyM vs PT
H2AFV	0	-1.18249	0.445	0.879	0	H2AFV	Inf	LyM vs PT
LSR	0	-1.42947	0.185	0.617	0	LSR	Inf	LyM vs PT
PDCD6IP	0	-1.44169	0.133	0.565	0	PDCD6IP	Inf	LyM vs PT
CAPRIN1	0	-1.13616	0.209	0.64	0	CAPRIN1	Inf	LyM vs PT
CREG1	0	-1.89412	0.109	0.539	0	CREG1	Inf	LyM vs PT
KIAA0586	0	-1.96193	0.109	0.539	0	KIAA0586	Inf	LyM vs PT
POLD2	0	-1.86876	0.127	0.557	0	POLD2	Inf	LyM vs PT
ARL2BP	0	-1.98268	0.094	0.523	0	ARL2BP	Inf	LyM vs PT
DDR1	0	-1.04621	0.226	0.655	0	DDR1	Inf	LyM vs PT
HPRT1	0	-1.80898	0.121	0.55	0	HPRT1	Inf	LyM vs PT
NAA20	0	-1.11258	0.306	0.735	0	NAA20	Inf	LyM vs PT
TBC1D9	0	-0.939595	0.272	0.701	0	TBC1D9	Inf	LyM vs PT
YPEL5	0	-1.33942	0.161	0.589	0	YPEL5	Inf	LyM vs PT
GADD45G	0	-1.60457	0.346	0.773	0	GADD45G	Inf	LyM vs PT
FBXL20	0	-3.89705	0.026	0.453	0	FBXL20	Inf	LyM vs PT
IMPAD1	0	-2.32467	0.069	0.496	0	IMPAD1	Inf	LyM vs PT
MTFR1	0	-2.61235	0.055	0.482	0	MTFR1	Inf	LyM vs PT
CCT5	0	-0.979158	0.302	0.728	0	CCT5	Inf	LyM vs PT
CDK2AP1	0	-5.92085	0.006	0.432	0	CDK2AP1	Inf	LyM vs PT
CFAP20	0	-2.31981	0.065	0.491	0	CFAP20	Inf	LyM vs PT
GSE1	0	-1.26674	0.138	0.564	0	GSE1	Inf	LyM vs PT
CNOT2	0	-1.06765	0.231	0.656	0	CNOT2	Inf	LyM vs PT
RAB11FIP1	0	-1.77647	0.241	0.666	0	RAB11FIP1	Inf	LyM vs PT
SIAH2	0	-1.62545	0.18	0.605	0	SIAH2	Inf	LyM vs PT
AGPS	0	-3.117	0.044	0.468	0	AGPS	Inf	LyM vs PT
FLOT2	0	-1.8632	0.101	0.525	0	FLOT2	Inf	LyM vs PT
HAX1	0	-1.05391	0.234	0.658	0	HAX1	Inf	LyM vs PT
TRAF7	0	-2.07024	0.082	0.505	0	TRAF7	Inf	LyM vs PT
SELENOP	0	-1.54892	0.144	0.567	0	SELENOP	Inf	LyM vs PT
ZNF703	0	-1.31746	0.169	0.592	0	ZNF703	Inf	LyM vs PT
ARHGDIA	0	-1.10913	0.221	0.643	0	ARHGDIA	Inf	LyM vs PT
HIST1H2BK	0	-1.9179	0.109	0.531	0	HIST1H2BK	Inf	LyM vs PT
KDELR1	0	-1.02313	0.359	0.781	0	KDELR1	Inf	LyM vs PT
S100P	0	-0.841291	0.382	0.804	0	S100P	Inf	LyM vs PT
ATP5PB	0	-1.07482	0.377	0.798	0	ATP5PB	Inf	LyM vs PT
MPLKIP	0	-1.10691	0.247	0.668	0	MPLKIP	Inf	LyM vs PT
SOX9	0	-1.96425	0.138	0.559	0	SOX9	Inf	LyM vs PT
UGP2	0	-1.1941	0.246	0.667	0	UGP2	Inf	LyM vs PT
LINC00174	0	-3.89094	0.015	0.436	0	LINC00174	Inf	LyM vs PT
NME1	0	14.010715597714	0.421	0	0	NME1	Inf	LyM vs PT
PHF12	0	-2.41289	0.071	0.492	0	PHF12	Inf	LyM vs PT
SMIM26	0	13.9089350584736	0.421	0	0	SMIM26	Inf	LyM vs PT
TLCD1	0	-2.27145	0.068	0.488	0	TLCD1	Inf	LyM vs PT
COA1	0	-1.52588	0.167	0.587	0	COA1	Inf	LyM vs PT
UBE2G2	0	-1.41143	0.162	0.582	0	UBE2G2	Inf	LyM vs PT
FKBP5	0	-5.45708	0.04	0.459	0	FKBP5	Inf	LyM vs PT
STOM	0	-1.88474	0.143	0.562	0	STOM	Inf	LyM vs PT
IL13RA1	0	-1.20723	0.204	0.622	0	IL13RA1	Inf	LyM vs PT
MRPL45	0	-1.83658	0.105	0.523	0	MRPL45	Inf	LyM vs PT
OSTC	0	-0.932944	0.366	0.784	0	OSTC	Inf	LyM vs PT
CAPZA1	0	-1.14358	0.181	0.599	0	CAPZA1	Inf	LyM vs PT
ECH1	0	-1.00518	0.216	0.633	0	ECH1	Inf	LyM vs PT
JPT2	0	-1.52148	0.14	0.557	0	JPT2	Inf	LyM vs PT
ENO1	0	-1.25538	0.467	0.884	0	ENO1	Inf	LyM vs PT
EIF4G2	0	-1.38647	0.467	0.883	0	EIF4G2	Inf	LyM vs PT
NUFIP2	0	-1.05117	0.408	0.824	0	NUFIP2	Inf	LyM vs PT
SCP2	0	-1.03663	0.288	0.704	0	SCP2	Inf	LyM vs PT
SRSF3	0	-1.25913	0.425	0.841	0	SRSF3	Inf	LyM vs PT
B3GALT5-AS1	0	-9.16738	0.001	0.416	0	B3GALT5-AS1	Inf	LyM vs PT
AGR2	0	-4.23169	0.404	0.819	0	AGR2	Inf	LyM vs PT
DYNLL2	0	-1.4274	0.14	0.554	0	DYNLL2	Inf	LyM vs PT
CDH1	0	-0.912773	0.469	0.882	0	CDH1	Inf	LyM vs PT
CPSF6	0	-1.77802	0.105	0.518	0	CPSF6	Inf	LyM vs PT
JUNB	0	-2.26742	0.485	0.898	0	JUNB	Inf	LyM vs PT
PPA2	0	-1.11654	0.223	0.636	0	PPA2	Inf	LyM vs PT
RTL8A	0	-1.16965	0.224	0.637	0	RTL8A	Inf	LyM vs PT
RNPS1	0	-1.02668	0.293	0.706	0	RNPS1	Inf	LyM vs PT
GOLPH3	0	-1.54154	0.12	0.532	0	GOLPH3	Inf	LyM vs PT
MRPL32	0	-1.09729	0.275	0.687	0	MRPL32	Inf	LyM vs PT
TIMP1	0	-0.903761	0.248	0.66	0	TIMP1	Inf	LyM vs PT
TUBB4B	0	-1.17051	0.346	0.758	0	TUBB4B	Inf	LyM vs PT
ECI1	0	-1.05462	0.256	0.667	0	ECI1	Inf	LyM vs PT
RALGAPA2	0	-3.33197	0.035	0.446	0	RALGAPA2	Inf	LyM vs PT
NORAD	0	-0.863663	0.297	0.708	0	NORAD	Inf	LyM vs PT
SERHL2	0	7.77284971377422	0.427	0.016	0	SERHL2	Inf	LyM vs PT
SLC25A24	0	-1.44797	0.175	0.586	0	SLC25A24	Inf	LyM vs PT
THSD4	0	-3.11285	0.049	0.459	0	THSD4	Inf	LyM vs PT
ATP13A2	0	-3.39239	0.028	0.438	0	ATP13A2	Inf	LyM vs PT
C2orf88	0	-9.66552	0	0.41	0	C2orf88	Inf	LyM vs PT
KDELR2	0	13.784440895494	0.41	0	0	KDELR2	Inf	LyM vs PT
RHOBTB3	0	-1.73812	0.161	0.571	0	RHOBTB3	Inf	LyM vs PT
TMEM50B	0	-1.64422	0.118	0.527	0	TMEM50B	Inf	LyM vs PT
RAB13	0	10.1101682345628	0.41	0.001	0	RAB13	Inf	LyM vs PT
UBAP2L	0	-1.07482	0.178	0.587	0	UBAP2L	Inf	LyM vs PT
SLC30A1	0	-2.9445	0.04	0.448	0	SLC30A1	Inf	LyM vs PT
TMEM230	0	-0.883823	0.338	0.746	0	TMEM230	Inf	LyM vs PT
EMD	0	-1.33947	0.154	0.561	0	EMD	Inf	LyM vs PT
IER3	0	-2.65514	0.387	0.794	0	IER3	Inf	LyM vs PT
IGF1R	0	-2.21394	0.098	0.505	0	IGF1R	Inf	LyM vs PT
RUNX1	0	-1.94668	0.095	0.502	0	RUNX1	Inf	LyM vs PT
AC093001.1	0	7.61564760565608	0.414	0.007	0	AC093001.1	Inf	LyM vs PT
CRNDE	0	-1.16195	0.232	0.638	0	CRNDE	Inf	LyM vs PT
JPT1	0	-0.886947	0.372	0.778	0	JPT1	Inf	LyM vs PT
UQCRHL	0	-3.52819	0.024	0.43	0	UQCRHL	Inf	LyM vs PT
GLUL	0	-1.06194	0.43	0.835	0	GLUL	Inf	LyM vs PT
EIF3B	0	-1.23303	0.164	0.569	0	EIF3B	Inf	LyM vs PT
ACADSB	0	-1.53629	0.135	0.539	0	ACADSB	Inf	LyM vs PT
UBE2H	0	-1.08039	0.193	0.597	0	UBE2H	Inf	LyM vs PT
CCDC130	0	-2.79461	0.049	0.452	0	CCDC130	Inf	LyM vs PT
HSDL2	0	-1.38876	0.146	0.549	0	HSDL2	Inf	LyM vs PT
TSEN34	0	-0.967366	0.228	0.631	0	TSEN34	Inf	LyM vs PT
SSU72	0	-0.739234	0.301	0.704	0	SSU72	Inf	LyM vs PT
BROX	0	-0.929086	0.231	0.633	0	BROX	Inf	LyM vs PT
GRN	0	-0.97082	0.375	0.777	0	GRN	Inf	LyM vs PT
RBBP4	0	-1.0286	0.233	0.635	0	RBBP4	Inf	LyM vs PT
MT-ND6	0	-1.55387	0.138	0.539	0	MT-ND6	Inf	LyM vs PT
PFDN2	0	-0.724026	0.334	0.735	0	PFDN2	Inf	LyM vs PT
URI1	0	-1.04571	0.166	0.567	0	URI1	Inf	LyM vs PT
CLK1	0	-1.33627	0.154	0.554	0	CLK1	Inf	LyM vs PT
COPB2	0	-0.85771	0.25	0.65	0	COPB2	Inf	LyM vs PT
DBNL	0	-1.73987	0.091	0.49	0	DBNL	Inf	LyM vs PT
PREX1	0	-3.10594	0.046	0.445	0	PREX1	Inf	LyM vs PT
SLC35B2	0	-2.86108	0.036	0.435	0	SLC35B2	Inf	LyM vs PT
SRSF2	0	-1.35504	0.476	0.875	0	SRSF2	Inf	LyM vs PT
ZNF552	0	-1.5208	0.159	0.558	0	ZNF552	Inf	LyM vs PT
PIGT	0	-1.09071	0.193	0.592	0	PIGT	Inf	LyM vs PT
TRIR	0	-0.896276	0.287	0.685	0	TRIR	Inf	LyM vs PT
ARCN1	0	-1.96022	0.069	0.467	0	ARCN1	Inf	LyM vs PT
HNRNPA0	0	-0.699247	0.328	0.726	0	HNRNPA0	Inf	LyM vs PT
HNRNPH2	0	-1.30069	0.143	0.54	0	HNRNPH2	Inf	LyM vs PT
POLR2C	0	-1.6203	0.104	0.501	0	POLR2C	Inf	LyM vs PT
PPP4C	0	-0.950646	0.325	0.722	0	PPP4C	Inf	LyM vs PT
RAB7A	0	-0.714559	0.3	0.697	0	RAB7A	Inf	LyM vs PT
BTF3L4	0	-1.19792	0.166	0.563	0	BTF3L4	Inf	LyM vs PT
FAM49B	0	-1.31097	0.167	0.564	0	FAM49B	Inf	LyM vs PT
SELENOF	0	-0.889732	0.252	0.648	0	SELENOF	Inf	LyM vs PT
SPCS3	0	-1.47762	0.255	0.651	0	SPCS3	Inf	LyM vs PT
NUDT21	0	-1.66686	0.098	0.493	0	NUDT21	Inf	LyM vs PT
PMVK	0	-1.24775	0.154	0.549	0	PMVK	Inf	LyM vs PT
SURF1	0	-1.23842	0.142	0.537	0	SURF1	Inf	LyM vs PT
UBE3C	0	-1.82878	0.082	0.477	0	UBE3C	Inf	LyM vs PT
EEF2	0	-0.562156	0.405	0.799	0	EEF2	Inf	LyM vs PT
PGD	0	-1.229	0.155	0.549	0	PGD	Inf	LyM vs PT
SLC44A1	0	-1.18819	0.146	0.539	0	SLC44A1	Inf	LyM vs PT
SPTSSB	0	-2.59154	0.106	0.499	0	SPTSSB	Inf	LyM vs PT
UBE2A	0	-0.856602	0.26	0.653	0	UBE2A	Inf	LyM vs PT
TAPBP	0	-0.867467	0.221	0.613	0	TAPBP	Inf	LyM vs PT
TMEM50A	0	-0.767545	0.393	0.785	0	TMEM50A	Inf	LyM vs PT
GDI2	0	-0.762562	0.269	0.66	0	GDI2	Inf	LyM vs PT
GID8	0	-0.760937	0.25	0.64	0	GID8	Inf	LyM vs PT
SNHG25	0	-1.44065	0.152	0.542	0	SNHG25	Inf	LyM vs PT
RHOB	0	-1.45522	0.467	0.857	0	RHOB	Inf	LyM vs PT
BRD7	0	-1.21794	0.145	0.534	0	BRD7	Inf	LyM vs PT
KRT7	0	4.59657519991657	0.536	0.147	0	KRT7	Inf	LyM vs PT
TRIB1	0	-1.29657	0.188	0.577	0	TRIB1	Inf	LyM vs PT
COPS9	0	-1.22359	0.49	0.878	0	COPS9	Inf	LyM vs PT
RND3	0	-2.72687	0.051	0.439	0	RND3	Inf	LyM vs PT
EXOC2	0	-3.56562	0.026	0.414	0	EXOC2	Inf	LyM vs PT
NAXE	0	-0.830171	0.306	0.694	0	NAXE	Inf	LyM vs PT
GDF15	0	-3.15174	0.161	0.548	0	GDF15	Inf	LyM vs PT
MAGED1	0	-1.30784	0.149	0.536	0	MAGED1	Inf	LyM vs PT
SF3B3	0	-2.29134	0.048	0.435	0	SF3B3	Inf	LyM vs PT
LLGL2	0	-1.59769	0.187	0.574	0	LLGL2	Inf	LyM vs PT
CRYZ	0	-2.35846	0.063	0.449	0	CRYZ	Inf	LyM vs PT
CSTB	0	-2.58373	0.475	0.861	0	CSTB	Inf	LyM vs PT
NECTIN2	0	-1.56931	0.137	0.523	0	NECTIN2	Inf	LyM vs PT
RCC2	0	-1.74855	0.088	0.474	0	RCC2	Inf	LyM vs PT
MAP1LC3B2	0	-3.52873	0.022	0.408	0	MAP1LC3B2	Inf	LyM vs PT
SOCS3	0	-4.56347	0.026	0.412	0	SOCS3	Inf	LyM vs PT
PAIP2	0	-0.76768	0.297	0.682	0	PAIP2	Inf	LyM vs PT
C19orf53	0	-1.8452	0.462	0.847	0	C19orf53	Inf	LyM vs PT
LAMTOR5	0	-0.76853	0.339	0.724	0	LAMTOR5	Inf	LyM vs PT
AUP1	0	-0.745214	0.239	0.623	0	AUP1	Inf	LyM vs PT
CALML5	0	5.60178647442128	0.445	0.061	0	CALML5	Inf	LyM vs PT
CCT2	0	-1.39893	0.49	0.874	0	CCT2	Inf	LyM vs PT
DCUN1D5	0	-2.38119	0.058	0.442	0	DCUN1D5	Inf	LyM vs PT
FAM46C	0	-3.81085	0.02	0.404	0	FAM46C	Inf	LyM vs PT
IFT20	0	-0.760195	0.279	0.663	0	IFT20	Inf	LyM vs PT
MRPS30	0	-1.62154	0.124	0.508	0	MRPS30	Inf	LyM vs PT
PPP1R14B	0	-0.775006	0.394	0.777	0	PPP1R14B	Inf	LyM vs PT
PTK2	0	-1.69127	0.098	0.481	0	PTK2	Inf	LyM vs PT
SDHB	0	-0.855695	0.243	0.626	0	SDHB	Inf	LyM vs PT
TEX14	0	-5.96607	0.008	0.391	0	TEX14	Inf	LyM vs PT
UQCRC2	0	-0.978641	0.209	0.592	0	UQCRC2	Inf	LyM vs PT
BCLAF1	0	3.31811855520649	0.789	0.407	0	BCLAF1	Inf	LyM vs PT
POLR2G	0	-1.11716	0.293	0.675	0	POLR2G	Inf	LyM vs PT
CHTOP	0	-1.35282	0.107	0.489	0	CHTOP	Inf	LyM vs PT
COX14	0	9.71491710446796	0.383	0.001	0	COX14	Inf	LyM vs PT
IMPDH2	0	-1.15799	0.155	0.537	0	IMPDH2	Inf	LyM vs PT
NRBP1	0	-1.0973	0.153	0.535	0	NRBP1	Inf	LyM vs PT
SS18	0	-1.97531	0.071	0.453	0	SS18	Inf	LyM vs PT
HSPH1	0	-1.09368	0.42	0.801	0	HSPH1	Inf	LyM vs PT
ATP6AP2	0	-0.895896	0.4	0.781	0	ATP6AP2	Inf	LyM vs PT
LRRC59	0	-1.27206	0.143	0.524	0	LRRC59	Inf	LyM vs PT
UHMK1	0	-0.962394	0.211	0.592	0	UHMK1	Inf	LyM vs PT
ILF2	0	-0.711159	0.314	0.695	0	ILF2	Inf	LyM vs PT
PDZD11	0	-1.05455	0.193	0.574	0	PDZD11	Inf	LyM vs PT
ATP5F1A	0	-0.683049	0.349	0.729	0	ATP5F1A	Inf	LyM vs PT
FAM241A	0	-2.47792	0.054	0.434	0	FAM241A	Inf	LyM vs PT
TFPI2	0	-5.79571	0.011	0.391	0	TFPI2	Inf	LyM vs PT
DUSP1	0	-1.50239	0.44	0.82	0	DUSP1	Inf	LyM vs PT
CAND1	0	-1.68871	0.119	0.498	0	CAND1	Inf	LyM vs PT
CPD	0	-3.9414	0.083	0.462	0	CPD	Inf	LyM vs PT
SRP54	0	-0.821309	0.229	0.608	0	SRP54	Inf	LyM vs PT
H2AFZ	0	-0.705241	0.509	0.887	0	H2AFZ	Inf	LyM vs PT
MRPL24	0	-0.773294	0.27	0.648	0	MRPL24	Inf	LyM vs PT
PGK1	0	-1.44111	0.504	0.882	0	PGK1	Inf	LyM vs PT
ATP6AP1	0	-0.771875	0.431	0.808	0	ATP6AP1	Inf	LyM vs PT
INIP	0	-0.97123	0.181	0.558	0	INIP	Inf	LyM vs PT
SDF4	0	-0.936711	0.183	0.56	0	SDF4	Inf	LyM vs PT
MCMBP	0	-2.92146	0.032	0.409	0	MCMBP	Inf	LyM vs PT
TIMM17A	0	-0.711099	0.316	0.693	0	TIMM17A	Inf	LyM vs PT
DNAAF2	0	-1.4605	0.113	0.489	0	DNAAF2	Inf	LyM vs PT
HDAC1	0	-1.2792	0.133	0.509	0	HDAC1	Inf	LyM vs PT
MAP1LC3B	0	-0.667621	0.402	0.778	0	MAP1LC3B	Inf	LyM vs PT
NFKBIA	0	-1.72129	0.507	0.883	0	NFKBIA	Inf	LyM vs PT
PPP1R10	0	-1.30354	0.169	0.545	0	PPP1R10	Inf	LyM vs PT
RER1	0	-0.737652	0.268	0.644	0	RER1	Inf	LyM vs PT
PKM	0	-1.0018	0.451	0.827	0	PKM	Inf	LyM vs PT
PDXK	0	-1.93566	0.108	0.483	0	PDXK	Inf	LyM vs PT
RSRP1	0	-0.93416	0.268	0.643	0	RSRP1	Inf	LyM vs PT
HNRNPAB	0	-0.655968	0.305	0.679	0	HNRNPAB	Inf	LyM vs PT
AK2	0	-0.869644	0.229	0.603	0	AK2	Inf	LyM vs PT
FOPNL	0	-1.60081	0.096	0.47	0	FOPNL	Inf	LyM vs PT
HIST1H2BH	0	-3.75891	0.029	0.403	0	HIST1H2BH	Inf	LyM vs PT
ITGB6	0	6.1191557394195	0.409	0.035	0	ITGB6	Inf	LyM vs PT
RBBP7	0	-0.842322	0.274	0.648	0	RBBP7	Inf	LyM vs PT
SERTAD1	0	-2.70549	0.055	0.429	0	SERTAD1	Inf	LyM vs PT
GPAA1	0	-0.990077	0.191	0.565	0	GPAA1	Inf	LyM vs PT
HIST1H2AC	0	-1.11812	0.247	0.62	0	HIST1H2AC	Inf	LyM vs PT
MAT2A	0	-1.91755	0.076	0.449	0	MAT2A	Inf	LyM vs PT
PPP6C	0	-1.19428	0.131	0.504	0	PPP6C	Inf	LyM vs PT
PYCR1	0	-1.21653	0.152	0.525	0	PYCR1	Inf	LyM vs PT
SELENBP1	0	-1.20642	0.145	0.518	0	SELENBP1	Inf	LyM vs PT
XPO1	0	-0.779657	0.191	0.564	0	XPO1	Inf	LyM vs PT
APH1A	0	-0.758272	0.26	0.632	0	APH1A	Inf	LyM vs PT
ATXN2L	0	-1.28688	0.134	0.506	0	ATXN2L	Inf	LyM vs PT
GOT2	0	-1.4066	0.101	0.473	0	GOT2	Inf	LyM vs PT
MCTS1	0	-0.90037	0.229	0.601	0	MCTS1	Inf	LyM vs PT
MRPL20	0	-0.588511	0.393	0.765	0	MRPL20	Inf	LyM vs PT
DNAJB1	0	-1.34936	0.417	0.788	0	DNAJB1	Inf	LyM vs PT
DRAP1	0	-0.71674	0.294	0.665	0	DRAP1	Inf	LyM vs PT
NT5C3B	0	-2.28232	0.062	0.433	0	NT5C3B	Inf	LyM vs PT
TMEM14B	0	13.5450654146169	0.371	0	0	TMEM14B	Inf	LyM vs PT
TPD52L1	0	-0.863881	0.25	0.621	0	TPD52L1	Inf	LyM vs PT
USO1	0	-1.23371	0.216	0.587	0	USO1	Inf	LyM vs PT
DCXR	0	-1.43473	0.337	0.708	0	DCXR	Inf	LyM vs PT
HUWE1	0	-1.10648	0.126	0.496	0	HUWE1	Inf	LyM vs PT
PTBP1	0	-1.09219	0.128	0.498	0	PTBP1	Inf	LyM vs PT
ARRDC3	0	-3.24727	0.038	0.407	0	ARRDC3	Inf	LyM vs PT
MKL2	0	-1.67696	0.083	0.452	0	MKL2	Inf	LyM vs PT
MPC2	0	-2.77809	0.35	0.719	0	MPC2	Inf	LyM vs PT
NUTF2	0	-0.7319	0.25	0.619	0	NUTF2	Inf	LyM vs PT
SUN1	0	-1.51599	0.111	0.48	0	SUN1	Inf	LyM vs PT
VMA21	0	-1.35227	0.117	0.486	0	VMA21	Inf	LyM vs PT
ADIPOR1	0	-0.600506	0.284	0.652	0	ADIPOR1	Inf	LyM vs PT
CERS6	0	-0.743985	0.267	0.635	0	CERS6	Inf	LyM vs PT
HINT2	0	13.7275033998477	0.368	0	0	HINT2	Inf	LyM vs PT
IFNGR2	0	-1.38454	0.114	0.482	0	IFNGR2	Inf	LyM vs PT
LAMP1	0	-0.708008	0.221	0.589	0	LAMP1	Inf	LyM vs PT
NDUFB6	0	-0.660831	0.329	0.697	0	NDUFB6	Inf	LyM vs PT
SMC1A	0	-0.954307	0.185	0.552	0	SMC1A	Inf	LyM vs PT
BTG2	0	-1.40986	0.228	0.595	0	BTG2	Inf	LyM vs PT
CHD9	0	-1.43117	0.14	0.507	0	CHD9	Inf	LyM vs PT
COPA	0	-0.513068	0.21	0.577	0	COPA	Inf	LyM vs PT
HERPUD1	0	-1.15486	0.389	0.756	0	HERPUD1	Inf	LyM vs PT
IARS2	0	-0.790842	0.232	0.599	0	IARS2	Inf	LyM vs PT
MOB1A	0	-0.666341	0.215	0.582	0	MOB1A	Inf	LyM vs PT
PATJ	0	-1.42808	0.141	0.508	0	PATJ	Inf	LyM vs PT
PPP2R1A	0	-0.662241	0.36	0.727	0	PPP2R1A	Inf	LyM vs PT
SPATS2L	0	-0.699725	0.253	0.62	0	SPATS2L	Inf	LyM vs PT
VPS72	0	-1.39432	0.103	0.47	0	VPS72	Inf	LyM vs PT
PHLDA2	0	-1.64819	0.315	0.681	0	PHLDA2	Inf	LyM vs PT
ADM	0	-2.82006	0.086	0.452	0	ADM	Inf	LyM vs PT
CA12	0	-1.02531	0.263	0.629	0	CA12	Inf	LyM vs PT
PRR13	0	11.1740951896019	0.366	0	0	PRR13	Inf	LyM vs PT
RABGGTB	0	-2.47504	0.052	0.418	0	RABGGTB	Inf	LyM vs PT
ELOC	0	-1.10807	0.452	0.818	0	ELOC	Inf	LyM vs PT
ARL3	0	-1.00429	0.229	0.594	0	ARL3	Inf	LyM vs PT
PEX2	0	-2.50771	0.088	0.453	0	PEX2	Inf	LyM vs PT
SORBS2	0	-3.33041	0.03	0.395	0	SORBS2	Inf	LyM vs PT
SUB1	0	-1.40831	0.544	0.909	0	SUB1	Inf	LyM vs PT
TRIM28	0	-1.00338	0.122	0.487	0	TRIM28	Inf	LyM vs PT
SLC35B1	0	-1.0711	0.177	0.541	0	SLC35B1	Inf	LyM vs PT
ADIRF	0	3.26000100882002	0.724	0.36	0	ADIRF	Inf	LyM vs PT
AMFR	0	-2.78857	0.035	0.399	0	AMFR	Inf	LyM vs PT
NUDCD2	0	-1.30762	0.137	0.501	0	NUDCD2	Inf	LyM vs PT
PLK2	0	-2.38774	0.111	0.475	0	PLK2	Inf	LyM vs PT
PNRC2	0	-0.553202	0.272	0.636	0	PNRC2	Inf	LyM vs PT
SUPT6H	0	-1.5052	0.1	0.464	0	SUPT6H	Inf	LyM vs PT
DYNLT3	0	-0.931902	0.2	0.564	0	DYNLT3	Inf	LyM vs PT
MLF2	0	-0.623011	0.286	0.649	0	MLF2	Inf	LyM vs PT
TUBA1C	0	-0.633863	0.408	0.771	0	TUBA1C	Inf	LyM vs PT
KRT10	0	-1.7227	0.576	0.939	0	KRT10	Inf	LyM vs PT
NCKAP1	0	-1.03643	0.139	0.502	0	NCKAP1	Inf	LyM vs PT
PPP1R15B	0	-2.09014	0.061	0.424	0	PPP1R15B	Inf	LyM vs PT
XPOT	0	-1.80878	0.079	0.442	0	XPOT	Inf	LyM vs PT
ABAT	0	-4.66795	0.01	0.372	0	ABAT	Inf	LyM vs PT
EFTUD2	0	-1.88426	0.064	0.426	0	EFTUD2	Inf	LyM vs PT
SNRNP70	0	-1.03536	0.151	0.513	0	SNRNP70	Inf	LyM vs PT
SOCS1	0	-4.44123	0.02	0.382	0	SOCS1	Inf	LyM vs PT
SP3	0	-1.63916	0.092	0.454	0	SP3	Inf	LyM vs PT
ZNF207	0	-0.65203	0.201	0.562	0	ZNF207	Inf	LyM vs PT
EIF4A2	0	-1.08893	0.494	0.855	0	EIF4A2	Inf	LyM vs PT
NDUFV3	0	-0.617864	0.262	0.623	0	NDUFV3	Inf	LyM vs PT
PGP	0	-1.55456	0.117	0.478	0	PGP	Inf	LyM vs PT
SLC25A5	0	-1.45806	0.564	0.924	0	SLC25A5	Inf	LyM vs PT
MRPS34	0	-0.970124	0.309	0.669	0	MRPS34	Inf	LyM vs PT
LONP2	0	-0.594914	0.259	0.619	0	LONP2	Inf	LyM vs PT
MID1IP1	0	-2.11413	0.075	0.435	0	MID1IP1	Inf	LyM vs PT
PIAS3	0	-1.94132	0.061	0.421	0	PIAS3	Inf	LyM vs PT
RAB6A	0	-0.917376	0.191	0.55	0	RAB6A	Inf	LyM vs PT
CMC1	0	-1.23652	0.145	0.504	0	CMC1	Inf	LyM vs PT
ERRFI1	0	-1.71324	0.118	0.477	0	ERRFI1	Inf	LyM vs PT
RAP1A	0	-1.2834	0.122	0.481	0	RAP1A	Inf	LyM vs PT
RHEB	0	-0.720219	0.26	0.619	0	RHEB	Inf	LyM vs PT
ATF3	0	-1.97446	0.302	0.66	0	ATF3	Inf	LyM vs PT
BIRC2	0	-1.76887	0.082	0.44	0	BIRC2	Inf	LyM vs PT
NDUFA8	0	-0.659374	0.252	0.61	0	NDUFA8	Inf	LyM vs PT
PSMA1	0	9.19909894942228	0.36	0.002	0	PSMA1	Inf	LyM vs PT
RNF7	0	6.31279959594537	0.372	0.014	0	RNF7	Inf	LyM vs PT
GADD45B	0	-1.04265	0.431	0.788	0	GADD45B	Inf	LyM vs PT
TRAPPC2L	0	-0.802411	0.185	0.542	0	TRAPPC2L	Inf	LyM vs PT
CTSD	0	13.5561629385114	0.357	0	0	CTSD	Inf	LyM vs PT
DHCR24	0	-0.831995	0.211	0.568	0	DHCR24	Inf	LyM vs PT
HAGH	0	-1.27937	0.165	0.522	0	HAGH	Inf	LyM vs PT
HSD17B10	0	-0.829696	0.217	0.574	0	HSD17B10	Inf	LyM vs PT
HSPA8	0	-1.55543	0.553	0.91	0	HSPA8	Inf	LyM vs PT
OS9	0	-0.690832	0.247	0.604	0	OS9	Inf	LyM vs PT
SCAMP3	0	-0.959139	0.166	0.523	0	SCAMP3	Inf	LyM vs PT
SUMO3	0	-1.4604	0.252	0.609	0	SUMO3	Inf	LyM vs PT
NPTN	0	-0.815748	0.182	0.538	0	NPTN	Inf	LyM vs PT
PNPLA2	0	-1.42141	0.104	0.46	0	PNPLA2	Inf	LyM vs PT
RNF10	0	-1.32118	0.112	0.468	0	RNF10	Inf	LyM vs PT
APRT	0	-0.874581	0.472	0.828	0	APRT	Inf	LyM vs PT
BCL10	0	-1.54634	0.13	0.486	0	BCL10	Inf	LyM vs PT
IRX5	0	-0.990295	0.133	0.489	0	IRX5	Inf	LyM vs PT
OVOL1	0	-3.9242	0.022	0.378	0	OVOL1	Inf	LyM vs PT
PARK7	0	-0.695215	0.47	0.826	0	PARK7	Inf	LyM vs PT
PPP1R11	0	-1.07379	0.132	0.488	0	PPP1R11	Inf	LyM vs PT
USP15	0	-0.874881	0.207	0.562	0	USP15	Inf	LyM vs PT
RHOT1	0	-1.36974	0.106	0.461	0	RHOT1	Inf	LyM vs PT
EIF6	0	5.95055783260562	0.375	0.02	0	EIF6	Inf	LyM vs PT
LINC00578	0	-6.04742	0.004	0.359	0	LINC00578	Inf	LyM vs PT
MAPK1IP1L	0	-1.02988	0.16	0.515	0	MAPK1IP1L	Inf	LyM vs PT
MESP1	0	-3.8572	0.024	0.379	0	MESP1	Inf	LyM vs PT
MXD1	0	-2.79604	0.044	0.398	0	MXD1	Inf	LyM vs PT
CAPN2	0	-0.515626	0.233	0.587	0	CAPN2	Inf	LyM vs PT
FKBP4	0	-0.701304	0.264	0.618	0	FKBP4	Inf	LyM vs PT
UBA2	0	-1.54875	0.095	0.449	0	UBA2	Inf	LyM vs PT
MZT2B	0	-0.911027	0.566	0.919	0	MZT2B	Inf	LyM vs PT
ITFG1	0	-0.76579	0.2	0.553	0	ITFG1	Inf	LyM vs PT
MRPS16	0	-0.618481	0.271	0.624	0	MRPS16	Inf	LyM vs PT
PRLR	0	-1.12269	0.149	0.502	0	PRLR	Inf	LyM vs PT
TRAP1	0	-1.57531	0.093	0.446	0	TRAP1	Inf	LyM vs PT
ARMT1	0	-1.11357	0.156	0.508	0	ARMT1	Inf	LyM vs PT
CSNK2B	0	11.0991575419177	0.352	0	0	CSNK2B	Inf	LyM vs PT
MX1	0	-2.46421	0.056	0.408	0	MX1	Inf	LyM vs PT
NET1	0	-0.73326	0.223	0.575	0	NET1	Inf	LyM vs PT
PEA15	0	-2.3031	0.135	0.487	0	PEA15	Inf	LyM vs PT
PICALM	0	-1.41002	0.09	0.442	0	PICALM	Inf	LyM vs PT
POLR1D	0	-0.686204	0.273	0.625	0	POLR1D	Inf	LyM vs PT
YEATS4	0	-1.04235	0.189	0.54	0	YEATS4	Inf	LyM vs PT
EIF3M	0	-0.640182	0.247	0.598	0	EIF3M	Inf	LyM vs PT
PRKDC	0	-0.87127	0.345	0.696	0	PRKDC	Inf	LyM vs PT
TFAP2B	0	4.94310643590006	0.436	0.085	0	TFAP2B	Inf	LyM vs PT
TMEM141	0	13.5021165610457	0.351	0	0	TMEM141	Inf	LyM vs PT
TM2D1	0	-1.56067	0.115	0.465	0	TM2D1	Inf	LyM vs PT
SEC61A1	0	-0.797987	0.171	0.521	0	SEC61A1	Inf	LyM vs PT
TRMT5	0	-2.01168	0.066	0.416	0	TRMT5	Inf	LyM vs PT
VBP1	0	-0.741193	0.231	0.581	0	VBP1	Inf	LyM vs PT
AMZ2	0	-0.950362	0.173	0.522	0	AMZ2	Inf	LyM vs PT
APBB2	0	-2.78405	0.043	0.392	0	APBB2	Inf	LyM vs PT
CTPS2	0	-2.77737	0.037	0.386	0	CTPS2	Inf	LyM vs PT
NDUFB3	0	-0.632723	0.45	0.799	0	NDUFB3	Inf	LyM vs PT
C1GALT1C1	0	-1.71934	0.079	0.428	0	C1GALT1C1	Inf	LyM vs PT
CHURC1	0	13.4577964851776	0.349	0	0	CHURC1	Inf	LyM vs PT
LAMTOR3	0	-1.06411	0.146	0.495	0	LAMTOR3	Inf	LyM vs PT
SLC52A2	0	-1.23364	0.13	0.479	0	SLC52A2	Inf	LyM vs PT
UBE2N	0	-0.800213	0.284	0.632	0	UBE2N	Inf	LyM vs PT
ARHGDIB	0	-1.51741	0.165	0.513	0	ARHGDIB	Inf	LyM vs PT
IDH1	0	-1.2859	0.13	0.478	0	IDH1	Inf	LyM vs PT
LSM1	0	-1.29169	0.137	0.485	0	LSM1	Inf	LyM vs PT
MRPL15	0	-1.53163	0.095	0.443	0	MRPL15	Inf	LyM vs PT
RPL36AL	0	-1.01199	0.553	0.901	0	RPL36AL	Inf	LyM vs PT
NQO1	0	-1.00059	0.577	0.924	0	NQO1	Inf	LyM vs PT
ATP6V1H	0	-1.37705	0.118	0.465	0	ATP6V1H	Inf	LyM vs PT
RTL8C	0	-0.785413	0.189	0.536	0	RTL8C	Inf	LyM vs PT
SMYD3	0	-3.29744	0.039	0.386	0	SMYD3	Inf	LyM vs PT
HSPA1A	0	-3.52888	0.629	0.976	0	HSPA1A	Inf	LyM vs PT
PPP6R3	0	-1.66422	0.087	0.434	0	PPP6R3	Inf	LyM vs PT
UTP6	0	-1.6942	0.074	0.421	0	UTP6	Inf	LyM vs PT
HNRNPUL1	0	-0.656932	0.183	0.529	0	HNRNPUL1	Inf	LyM vs PT
DCAF13	0	-1.16558	0.137	0.483	0	DCAF13	Inf	LyM vs PT
GLRX3	0	-1.11274	0.147	0.493	0	GLRX3	Inf	LyM vs PT
RNPEP	0	-0.919756	0.173	0.518	0	RNPEP	Inf	LyM vs PT
SLC9A3R2	0	-1.92144	0.061	0.406	0	SLC9A3R2	Inf	LyM vs PT
POLR3K	0	-1.37474	0.138	0.483	0	POLR3K	Inf	LyM vs PT
S100A8	0	3.83481630711451	0.473	0.128	0	S100A8	Inf	LyM vs PT
H2AFJ	0	-1.61504	0.591	0.935	0	H2AFJ	Inf	LyM vs PT
ALCAM	0	2.50085967570628	0.771	0.427	0	ALCAM	Inf	LyM vs PT
MDM2	0	-1.26983	0.148	0.492	0	MDM2	Inf	LyM vs PT
VCP	0	-0.60738	0.254	0.597	0	VCP	Inf	LyM vs PT
CD47	0	-0.950569	0.216	0.558	0	CD47	Inf	LyM vs PT
EI24	0	-0.759493	0.21	0.552	0	EI24	Inf	LyM vs PT
C16orf72	0	-2.20735	0.046	0.388	0	C16orf72	Inf	LyM vs PT
CLU	0	3.66896478704273	0.658	0.316	0	CLU	Inf	LyM vs PT
DDOST	0	-0.744863	0.203	0.545	0	DDOST	Inf	LyM vs PT
FAM102A	0	-1.32063	0.105	0.447	0	FAM102A	Inf	LyM vs PT
LYPLA1	0	-1.5101	0.307	0.649	0	LYPLA1	Inf	LyM vs PT
TPGS2	0	-1.3941	0.123	0.465	0	TPGS2	Inf	LyM vs PT
HNRNPH3	0	-0.536356	0.256	0.598	0	HNRNPH3	Inf	LyM vs PT
MBTPS1	0	-1.02576	0.136	0.478	0	MBTPS1	Inf	LyM vs PT
METTL5	0	-0.731743	0.204	0.545	0	METTL5	Inf	LyM vs PT
SLC2A4RG	0	-0.520758	0.218	0.559	0	SLC2A4RG	Inf	LyM vs PT
TM9SF2	0	-0.645594	0.219	0.56	0	TM9SF2	Inf	LyM vs PT
TMEM30B	0	-2.34048	0.04	0.381	0	TMEM30B	Inf	LyM vs PT
ACADVL	0	-1.06065	0.131	0.472	0	ACADVL	Inf	LyM vs PT
ATP5F1C	0	-0.659947	0.397	0.738	0	ATP5F1C	Inf	LyM vs PT
CAPN1	0	-1.12761	0.136	0.477	0	CAPN1	Inf	LyM vs PT
CUL4B	0	-1.48103	0.084	0.425	0	CUL4B	Inf	LyM vs PT
DNAJB6	0	-0.690976	0.241	0.582	0	DNAJB6	Inf	LyM vs PT
DNAJC21	0	-0.997929	0.145	0.486	0	DNAJC21	Inf	LyM vs PT
SRP9	0	-0.875653	0.531	0.872	0	SRP9	Inf	LyM vs PT
YIF1A	0	-0.670488	0.278	0.619	0	YIF1A	Inf	LyM vs PT
EIF1B	0	-0.714664	0.198	0.538	0	EIF1B	Inf	LyM vs PT
TDP2	0	-2.08466	0.053	0.393	0	TDP2	Inf	LyM vs PT
GNS	0	-1.09442	0.145	0.485	0	GNS	Inf	LyM vs PT
TIPARP	0	-2.15426	0.072	0.412	0	TIPARP	Inf	LyM vs PT
RRAGA	0	-1.28901	0.111	0.45	0	RRAGA	Inf	LyM vs PT
PPIF	0	-1.99199	0.072	0.411	0	PPIF	Inf	LyM vs PT
TMEM179B	0	-0.718946	0.359	0.698	0	TMEM179B	Inf	LyM vs PT
CSNK1D	0	-0.837446	0.179	0.517	0	CSNK1D	Inf	LyM vs PT
EGR1	0	-1.30975	0.386	0.724	0	EGR1	Inf	LyM vs PT
ZFAND3	0	-1.84907	0.084	0.422	0	ZFAND3	Inf	LyM vs PT
HSF1	0	-1.41186	0.107	0.444	0	HSF1	Inf	LyM vs PT
CNDP2	0	-0.808273	0.153	0.49	0	CNDP2	Inf	LyM vs PT
MPZL1	0	-0.900031	0.15	0.487	0	MPZL1	Inf	LyM vs PT
NUCB1	0	-1.33462	0.098	0.435	0	NUCB1	Inf	LyM vs PT
NCSTN	0	-0.953456	0.129	0.465	0	NCSTN	Inf	LyM vs PT
NOC2L	0	-1.5802	0.067	0.403	0	NOC2L	Inf	LyM vs PT
NXF1	0	-2.03649	0.057	0.393	0	NXF1	Inf	LyM vs PT
RABGAP1L	0	-2.15348	0.064	0.4	0	RABGAP1L	Inf	LyM vs PT
RBBP8	0	-0.778532	0.172	0.508	0	RBBP8	Inf	LyM vs PT
SND1	0	-1.87206	0.058	0.394	0	SND1	Inf	LyM vs PT
VKORC1	0	13.4152955223041	0.336	0	0	VKORC1	Inf	LyM vs PT
FAM234A	0	-1.44288	0.087	0.423	0	FAM234A	Inf	LyM vs PT
HADHB	0	-0.553529	0.242	0.578	0	HADHB	Inf	LyM vs PT
TMEM30A	0	-1.03594	0.141	0.477	0	TMEM30A	Inf	LyM vs PT
CMTM6	0	-0.673046	0.219	0.554	0	CMTM6	Inf	LyM vs PT
TMEM68	0	-1.83499	0.066	0.401	0	TMEM68	Inf	LyM vs PT
B4GALT1	0	-1.11405	0.143	0.478	0	B4GALT1	Inf	LyM vs PT
CALR	0	-1.35406	0.536	0.871	0	CALR	Inf	LyM vs PT
SLC39A6	0	-1.28281	0.582	0.916	0	SLC39A6	Inf	LyM vs PT
FLYWCH2	0	-1.14424	0.129	0.463	0	FLYWCH2	Inf	LyM vs PT
MYB	0	-2.65364	0.05	0.384	0	MYB	Inf	LyM vs PT
TRPC4AP	0	-2.50129	0.038	0.372	0	TRPC4AP	Inf	LyM vs PT
AKR7A2	0	-0.947617	0.168	0.502	0	AKR7A2	Inf	LyM vs PT
FAM84B	0	-1.33141	0.1	0.434	0	FAM84B	Inf	LyM vs PT
TRIP12	0	-0.727447	0.168	0.502	0	TRIP12	Inf	LyM vs PT
LARP1	0	-0.51832	0.218	0.551	0	LARP1	Inf	LyM vs PT
AARS	0	-2.15178	0.048	0.381	0	AARS	Inf	LyM vs PT
CYTOR	0	13.5766334874409	0.333	0	0	CYTOR	Inf	LyM vs PT
EXOC4	0	-2.43375	0.048	0.381	0	EXOC4	Inf	LyM vs PT
SLC20A1	0	-1.2706	0.12	0.453	0	SLC20A1	Inf	LyM vs PT
SH3GLB2	0	-1.39525	0.084	0.417	0	SH3GLB2	Inf	LyM vs PT
TSPAN13	0	-1.35386	0.538	0.871	0	TSPAN13	Inf	LyM vs PT
STX10	0	-1.48885	0.121	0.453	0	STX10	Inf	LyM vs PT
ABHD2	0	-1.49742	0.097	0.429	0	ABHD2	Inf	LyM vs PT
RHOA	0	-0.723368	0.554	0.886	0	RHOA	Inf	LyM vs PT
SNAPIN	0	-1.06551	0.147	0.479	0	SNAPIN	Inf	LyM vs PT
TSN	0	-0.977338	0.137	0.469	0	TSN	Inf	LyM vs PT
IP6K2	0	-0.557395	0.194	0.525	0	IP6K2	Inf	LyM vs PT
TSTA3	0	-0.71633	0.182	0.513	0	TSTA3	Inf	LyM vs PT
U2AF2	0	-1.04019	0.106	0.437	0	U2AF2	Inf	LyM vs PT
TOMM7	0	-0.704575	0.504	0.835	0	TOMM7	Inf	LyM vs PT
ATP6V1C1	0	-1.06726	0.133	0.463	0	ATP6V1C1	Inf	LyM vs PT
CDK13	0	-1.0834	0.113	0.443	0	CDK13	Inf	LyM vs PT
KPNA2	0	-1.20597	0.133	0.463	0	KPNA2	Inf	LyM vs PT
OSBP	0	-1.74903	0.069	0.399	0	OSBP	Inf	LyM vs PT
TMED2	0	-0.736911	0.429	0.759	0	TMED2	Inf	LyM vs PT
MAFB	0	-2.39231	0.213	0.542	0	MAFB	Inf	LyM vs PT
MEAF6	0	-1.58568	0.363	0.692	0	MEAF6	Inf	LyM vs PT
GORASP2	0	-0.6542	0.226	0.554	0	GORASP2	Inf	LyM vs PT
ZDHHC9	0	-1.29633	0.102	0.43	0	ZDHHC9	Inf	LyM vs PT
CXCR4	0	-3.00698	0.03	0.358	0	CXCR4	Inf	LyM vs PT
RIOK3	0	-0.869338	0.158	0.486	0	RIOK3	Inf	LyM vs PT
CHCHD7	0	-1.01167	0.136	0.463	0	CHCHD7	Inf	LyM vs PT
MXI1	0	-1.48643	0.115	0.442	0	MXI1	Inf	LyM vs PT
UBA6	0	-1.54602	0.108	0.435	0	UBA6	Inf	LyM vs PT
BAG6	0	-1.16123	0.093	0.42	0	BAG6	Inf	LyM vs PT
RNH1	0	-0.599338	0.211	0.537	0	RNH1	Inf	LyM vs PT
SPTLC1	0	-0.943195	0.136	0.462	0	SPTLC1	Inf	LyM vs PT
NDUFAB1	0	-0.651323	0.496	0.822	0	NDUFAB1	Inf	LyM vs PT
TRPT1	0	-1.48195	0.097	0.423	0	TRPT1	Inf	LyM vs PT
TYMP	0	3.63485364979457	0.423	0.097	0	TYMP	Inf	LyM vs PT
SAR1B	0	-0.583506	0.218	0.543	0	SAR1B	Inf	LyM vs PT
TMEM167A	0	-0.590592	0.217	0.542	0	TMEM167A	Inf	LyM vs PT
LRBA	0	-2.19219	0.057	0.382	0	LRBA	Inf	LyM vs PT
DDIT4	0	-0.685163	0.262	0.587	0	DDIT4	Inf	LyM vs PT
GSN	0	-0.580348	0.169	0.494	0	GSN	Inf	LyM vs PT
HIST1H1C	0	-1.02792	0.505	0.83	0	HIST1H1C	Inf	LyM vs PT
GALNT1	0	-0.674946	0.214	0.538	0	GALNT1	Inf	LyM vs PT
GALNT3	0	-0.665254	0.235	0.559	0	GALNT3	Inf	LyM vs PT
CRABP1	0	-2.52208	0.041	0.365	0	CRABP1	Inf	LyM vs PT
CSE1L	0	-1.12285	0.121	0.445	0	CSE1L	Inf	LyM vs PT
GLYR1	0	-1.14852	0.115	0.439	0	GLYR1	Inf	LyM vs PT
TSPYL2	0	-2.45347	0.055	0.379	0	TSPYL2	Inf	LyM vs PT
YTHDF3	0	-2.07676	0.048	0.372	0	YTHDF3	Inf	LyM vs PT
C1QBP	0	-0.827178	0.168	0.492	0	C1QBP	Inf	LyM vs PT
PDHB	0	-0.869089	0.15	0.474	0	PDHB	Inf	LyM vs PT
TNFRSF12A	0	-1.24212	0.169	0.493	0	TNFRSF12A	Inf	LyM vs PT
DRAM2	0	-1.74613	0.072	0.395	0	DRAM2	Inf	LyM vs PT
KIAA1958	0	-2.31609	0.054	0.377	0	KIAA1958	Inf	LyM vs PT
BCAS2	0	-0.8473	0.157	0.48	0	BCAS2	Inf	LyM vs PT
TMEM167B	0	-1.40655	0.095	0.418	0	TMEM167B	Inf	LyM vs PT
ZFAND1	0	-1.61955	0.089	0.412	0	ZFAND1	Inf	LyM vs PT
CYLD	0	-2.47708	0.039	0.361	0	CYLD	Inf	LyM vs PT
WBP2	0	-0.852806	0.173	0.495	0	WBP2	Inf	LyM vs PT
SLC29A1	0	-1.49775	0.101	0.423	0	SLC29A1	Inf	LyM vs PT
GPS1	0	-1.09273	0.122	0.443	0	GPS1	Inf	LyM vs PT
JKAMP	0	-0.782602	0.183	0.504	0	JKAMP	Inf	LyM vs PT
ITPA	0	-0.911866	0.15	0.471	0	ITPA	Inf	LyM vs PT
ADAM9	0	-1.87682	0.066	0.386	0	ADAM9	Inf	LyM vs PT
C6orf48	0	13.3167663011633	0.32	0	0	C6orf48	Inf	LyM vs PT
CAP2	0	-2.19752	0.061	0.381	0	CAP2	Inf	LyM vs PT
SEC23B	0	-0.678467	0.199	0.519	0	SEC23B	Inf	LyM vs PT
VEGFB	0	-1.78497	0.066	0.386	0	VEGFB	Inf	LyM vs PT
FAM129B	0	-1.32696	0.089	0.409	0	FAM129B	Inf	LyM vs PT
TUBB2A	0	-1.28205	0.095	0.415	0	TUBB2A	Inf	LyM vs PT
GNPTG	0	-0.639245	0.203	0.522	0	GNPTG	Inf	LyM vs PT
RAB5B	0	-1.00711	0.121	0.44	0	RAB5B	Inf	LyM vs PT
RAP1GDS1	0	-1.83252	0.076	0.395	0	RAP1GDS1	Inf	LyM vs PT
ELAVL1	0	-0.819714	0.155	0.474	0	ELAVL1	Inf	LyM vs PT
LDHA	0	-1.32312	0.506	0.825	0	LDHA	Inf	LyM vs PT
MRPL58	0	-0.961775	0.167	0.486	0	MRPL58	Inf	LyM vs PT
NMD3	0	-1.43881	0.1	0.419	0	NMD3	Inf	LyM vs PT
RAB4A	0	-0.588631	0.219	0.537	0	RAB4A	Inf	LyM vs PT
ACOT13	0	-1.19429	0.117	0.435	0	ACOT13	Inf	LyM vs PT
ALYREF	0	-2.15153	0.046	0.364	0	ALYREF	Inf	LyM vs PT
CCDC115	0	-1.07777	0.121	0.439	0	CCDC115	Inf	LyM vs PT
HIGD2A	0	13.1953158810158	0.318	0	0	HIGD2A	Inf	LyM vs PT
MAF1	0	-1.20196	0.119	0.437	0	MAF1	Inf	LyM vs PT
PCNA	0	-0.701242	0.173	0.491	0	PCNA	Inf	LyM vs PT
UBALD2	0	-1.65445	0.077	0.395	0	UBALD2	Inf	LyM vs PT
GNG12	0	-1.37657	0.092	0.41	0	GNG12	Inf	LyM vs PT
TRAM1	0	-0.872069	0.381	0.699	0	TRAM1	Inf	LyM vs PT
ADAM15	0	-0.50585	0.207	0.524	0	ADAM15	Inf	LyM vs PT
CORO1B	0	-0.939141	0.149	0.466	0	CORO1B	Inf	LyM vs PT
DDB1	0	-0.931878	0.143	0.46	0	DDB1	Inf	LyM vs PT
RNF11	0	-0.793087	0.149	0.466	0	RNF11	Inf	LyM vs PT
KCTD5	0	-1.93298	0.057	0.374	0	KCTD5	Inf	LyM vs PT
NEK7	0	-2.50242	0.038	0.355	0	NEK7	Inf	LyM vs PT
NR2F2	0	-1.00938	0.121	0.438	0	NR2F2	Inf	LyM vs PT
PIGP	0	-0.895584	0.165	0.482	0	PIGP	Inf	LyM vs PT
LRRFIP2	0	-0.865694	0.205	0.521	0	LRRFIP2	Inf	LyM vs PT
BTBD6	0	-1.74751	0.062	0.378	0	BTBD6	Inf	LyM vs PT
CPT1A	0	-1.13156	0.125	0.441	0	CPT1A	Inf	LyM vs PT
CUL3	0	-1.09209	0.12	0.436	0	CUL3	Inf	LyM vs PT
SFN	0	-1.81938	0.115	0.431	0	SFN	Inf	LyM vs PT
TMEM70	0	-1.38975	0.124	0.44	0	TMEM70	Inf	LyM vs PT
ZDHHC5	0	-2.00103	0.048	0.364	0	ZDHHC5	Inf	LyM vs PT
MTA1	0	-1.30765	0.095	0.411	0	MTA1	Inf	LyM vs PT
CAPZA2	0	-0.635204	0.206	0.521	0	CAPZA2	Inf	LyM vs PT
SNHG16	0	-0.564502	0.206	0.521	0	SNHG16	Inf	LyM vs PT
CLPTM1	0	-1.29847	0.103	0.418	0	CLPTM1	Inf	LyM vs PT
CTNNBIP1	0	-1.12937	0.109	0.424	0	CTNNBIP1	Inf	LyM vs PT
CTSH	0	-1.16257	0.119	0.434	0	CTSH	Inf	LyM vs PT
DLD	0	-1.22137	0.11	0.425	0	DLD	Inf	LyM vs PT
UBE2S	0	-0.554118	0.192	0.507	0	UBE2S	Inf	LyM vs PT
ZNF146	0	-1.14516	0.108	0.423	0	ZNF146	Inf	LyM vs PT
HSPB11	0	-0.92188	0.16	0.475	0	HSPB11	Inf	LyM vs PT
SUCLG2	0	-0.867114	0.155	0.47	0	SUCLG2	Inf	LyM vs PT
TMEM87B	0	-1.29499	0.099	0.414	0	TMEM87B	Inf	LyM vs PT
METTL9	0	-0.63062	0.199	0.513	0	METTL9	Inf	LyM vs PT
PTRH1	0	-1.13427	0.124	0.438	0	PTRH1	Inf	LyM vs PT
RCOR3	0	-1.1548	0.105	0.419	0	RCOR3	Inf	LyM vs PT
RND1	0	-2.7934	0.056	0.37	0	RND1	Inf	LyM vs PT
SMIM15	0	-0.940433	0.137	0.451	0	SMIM15	Inf	LyM vs PT
DNPH1	0	-0.830682	0.154	0.467	0	DNPH1	Inf	LyM vs PT
IER2	0	-3.01454	0.618	0.931	0	IER2	Inf	LyM vs PT
TAF1D	0	-0.635465	0.205	0.518	0	TAF1D	Inf	LyM vs PT
CIAPIN1	0	-2.21879	0.044	0.357	0	CIAPIN1	Inf	LyM vs PT
CYP4B1	0	-4.06959	0.014	0.327	0	CYP4B1	Inf	LyM vs PT
ETS2	0	-3.59001	0.022	0.335	0	ETS2	Inf	LyM vs PT
KCMF1	0	-1.02766	0.117	0.43	0	KCMF1	Inf	LyM vs PT
NUP107	0	-1.65141	0.083	0.396	0	NUP107	Inf	LyM vs PT
STK39	0	-2.69297	0.037	0.35	0	STK39	Inf	LyM vs PT
UBQLN2	0	-1.68781	0.062	0.375	0	UBQLN2	Inf	LyM vs PT
WAC	0	-0.62914	0.195	0.508	0	WAC	Inf	LyM vs PT
ERLIN2	0	-1.22844	0.1	0.413	0	ERLIN2	Inf	LyM vs PT
SEC61G	0	-0.755592	0.532	0.845	0	SEC61G	Inf	LyM vs PT
DERL1	0	-0.804375	0.149	0.461	0	DERL1	Inf	LyM vs PT
GOLM1	0	-1.15774	0.231	0.543	0	GOLM1	Inf	LyM vs PT
CCDC90B	0	-0.688533	0.194	0.506	0	CCDC90B	Inf	LyM vs PT
CNOT11	0	-2.03732	0.041	0.353	0	CNOT11	Inf	LyM vs PT
NPDC1	0	5.27923	0.341	0.029	0	NPDC1	Inf	LyM vs PT
CDC42EP4	0	-1.85048	0.059	0.37	0	CDC42EP4	Inf	LyM vs PT
KDM2A	0	-1.1185	0.103	0.414	0	KDM2A	Inf	LyM vs PT
NAA50	0	-1.03185	0.12	0.431	0	NAA50	Inf	LyM vs PT
NSFL1C	0	-0.750137	0.162	0.473	0	NSFL1C	Inf	LyM vs PT
ZMYM2	0	-1.11565	0.098	0.409	0	ZMYM2	Inf	LyM vs PT
CNPY2	0	13.2025446835615	0.309	0	0	CNPY2	Inf	LyM vs PT
LEPROT	0	13.2542782568445	0.309	0	0	LEPROT	Inf	LyM vs PT
MCRIP2	0	-1.76084	0.085	0.394	0	MCRIP2	Inf	LyM vs PT
SYPL1	0	-0.874279	0.152	0.46	0	SYPL1	Inf	LyM vs PT
LTF	0	6.68645907408881	0.311	0.003	0	LTF	Inf	LyM vs PT
PTPN18	0	-1.36296	0.083	0.391	0	PTPN18	Inf	LyM vs PT
SDHA	0	13.4978396057254	0.308	0	0	SDHA	Inf	LyM vs PT
FAM50A	0	-0.798722	0.155	0.462	0	FAM50A	Inf	LyM vs PT
MORF4L2	0	-0.844718	0.596	0.903	0	MORF4L2	Inf	LyM vs PT
RNF114	0	-0.736714	0.142	0.449	0	RNF114	Inf	LyM vs PT
UBA1	0	-0.566754	0.15	0.457	0	UBA1	Inf	LyM vs PT
VAMP3	0	-1.2642	0.091	0.398	0	VAMP3	Inf	LyM vs PT
INF2	0	-1.81935	0.054	0.361	0	INF2	Inf	LyM vs PT
MBOAT1	0	-5.24525	0.006	0.313	0	MBOAT1	Inf	LyM vs PT
NEU1	0	-0.853562	0.138	0.445	0	NEU1	Inf	LyM vs PT
SCGB2A2	0	5.22562761496886	0.566	0.259	0	SCGB2A2	Inf	LyM vs PT
AIFM1	0	-1.30335	0.087	0.393	0	AIFM1	Inf	LyM vs PT
SNHG15	0	-1.3505	0.093	0.399	0	SNHG15	Inf	LyM vs PT
CLDN7	0	3.34988517278674	0.429	0.123	0	CLDN7	Inf	LyM vs PT
FAM3B	0	-3.78473	0.023	0.329	0	FAM3B	Inf	LyM vs PT
PARN	0	-0.966778	0.13	0.436	0	PARN	Inf	LyM vs PT
PPP1R2	0	-0.947206	0.137	0.443	0	PPP1R2	Inf	LyM vs PT
TAF12	0	-1.03237	0.118	0.424	0	TAF12	Inf	LyM vs PT
RNF130	0	-1.24585	0.101	0.407	0	RNF130	Inf	LyM vs PT
SRP68	0	-1.21214	0.097	0.402	0	SRP68	Inf	LyM vs PT
HMGN4	0	-3.3718	0.018	0.323	0	HMGN4	Inf	LyM vs PT
IDH3B	0	-0.639983	0.176	0.481	0	IDH3B	Inf	LyM vs PT
PSENEN	0	13.2028259994449	0.305	0	0	PSENEN	Inf	LyM vs PT
SNRNP200	0	-0.744509	0.128	0.433	0	SNRNP200	Inf	LyM vs PT
ADK	0	-0.810115	0.167	0.472	0	ADK	Inf	LyM vs PT
C5orf15	0	-1.08867	0.111	0.415	0	C5orf15	Inf	LyM vs PT
FUBP3	0	-1.46343	0.067	0.371	0	FUBP3	Inf	LyM vs PT
ZNF107	0	-2.37211	0.041	0.345	0	ZNF107	Inf	LyM vs PT
NXT1	0	-1.35714	0.089	0.392	0	NXT1	Inf	LyM vs PT
SRM	0	-1.40277	0.089	0.392	0	SRM	Inf	LyM vs PT
AMPH	0	-7.74517	0.002	0.305	0	AMPH	Inf	LyM vs PT
TTC6	0	-1.89599	0.051	0.354	0	TTC6	Inf	LyM vs PT
ZFYVE21	0	-0.815369	0.14	0.443	0	ZFYVE21	Inf	LyM vs PT
CLDN3	0	-0.934115	0.562	0.865	0	CLDN3	Inf	LyM vs PT
CHID1	0	-1.19116	0.103	0.405	0	CHID1	Inf	LyM vs PT
HAT1	0	-0.851147	0.156	0.458	0	HAT1	Inf	LyM vs PT
PCBP1	0	-0.637599	0.585	0.887	0	PCBP1	Inf	LyM vs PT
PTS	0	-0.761596	0.157	0.459	0	PTS	Inf	LyM vs PT
ATP13A1	0	-2.16906	0.045	0.347	0	ATP13A1	Inf	LyM vs PT
DEPP1	0	-2.24716	0.06	0.362	0	DEPP1	Inf	LyM vs PT
EEF1E1	0	13.1480096712686	0.302	0	0	EEF1E1	Inf	LyM vs PT
SLC19A2	0	-3.43887	0.022	0.324	0	SLC19A2	Inf	LyM vs PT
UBL3	0	-0.875874	0.122	0.424	0	UBL3	Inf	LyM vs PT
GFPT1	0	-0.703312	0.171	0.473	0	GFPT1	Inf	LyM vs PT
LZIC	0	-0.915756	0.142	0.443	0	LZIC	Inf	LyM vs PT
CHI3L2	0	-5.13192	0.008	0.309	0	CHI3L2	Inf	LyM vs PT
DUS1L	0	-1.89186	0.046	0.347	0	DUS1L	Inf	LyM vs PT
HTATIP2	0	-0.79764	0.193	0.494	0	HTATIP2	Inf	LyM vs PT
KDM5C	0	-1.94679	0.048	0.349	0	KDM5C	Inf	LyM vs PT
KLF2	0	-2.72508	0.049	0.35	0	KLF2	Inf	LyM vs PT
TNFSF10	0	3.77456331486374	0.806	0.506	0	TNFSF10	Inf	LyM vs PT
ABHD3	0	-1.94017	0.059	0.359	0	ABHD3	Inf	LyM vs PT
IFRD1	0	-1.66421	0.078	0.378	0	IFRD1	Inf	LyM vs PT
KRTCAP3	0	-1.31995	0.113	0.413	0	KRTCAP3	Inf	LyM vs PT
MIR4458HG	0	3.99192770169232	0.427	0.127	0	MIR4458HG	Inf	LyM vs PT
NKAIN1	0	-1.67135	0.074	0.374	0	NKAIN1	Inf	LyM vs PT
SMIM37	0	-0.760442	0.17	0.47	0	SMIM37	Inf	LyM vs PT
DDX56	0	-1.15241	0.111	0.41	0	DDX56	Inf	LyM vs PT
PANK3	0	-1.65447	0.072	0.371	0	PANK3	Inf	LyM vs PT
TWF1	0	-0.770918	0.141	0.439	0	TWF1	Inf	LyM vs PT
AFF3	0	-1.9658	0.134	0.432	0	AFF3	Inf	LyM vs PT
GOLGA5	0	-1.35343	0.085	0.383	0	GOLGA5	Inf	LyM vs PT
GTF2B	0	-1.67098	0.079	0.377	0	GTF2B	Inf	LyM vs PT
NSF	0	-2.03454	0.062	0.36	0	NSF	Inf	LyM vs PT
POLR2A	0	-2.12736	0.047	0.345	0	POLR2A	Inf	LyM vs PT
STK17A	0	-1.48591	0.076	0.374	0	STK17A	Inf	LyM vs PT
TMBIM4	0	13.0736721732648	0.298	0	0	TMBIM4	Inf	LyM vs PT
CNOT1	0	-0.70528	0.145	0.442	0	CNOT1	Inf	LyM vs PT
SS18L2	0	-0.883138	0.143	0.44	0	SS18L2	Inf	LyM vs PT
CLIC4	0	-1.18817	0.126	0.423	0	CLIC4	Inf	LyM vs PT
NR2C2AP	0	-1.81897	0.068	0.365	0	NR2C2AP	Inf	LyM vs PT
STX3	0	-1.45076	0.083	0.38	0	STX3	Inf	LyM vs PT
AC006449.6	0	-4.25225	0.012	0.308	0	AC006449.6	Inf	LyM vs PT
AL451165.2	0	-1.67162	0.063	0.359	0	AL451165.2	Inf	LyM vs PT
ARL6IP6	0	-1.59129	0.069	0.365	0	ARL6IP6	Inf	LyM vs PT
HIST2H2BF	0	-4.20589	0.011	0.307	0	HIST2H2BF	Inf	LyM vs PT
MBD2	0	-1.24792	0.082	0.378	0	MBD2	Inf	LyM vs PT
NAMPT	0	-1.71256	0.071	0.367	0	NAMPT	Inf	LyM vs PT
UNC50	0	-1.61496	0.068	0.364	0	UNC50	Inf	LyM vs PT
VAMP7	0	-1.94684	0.049	0.345	0	VAMP7	Inf	LyM vs PT
CNOT3	0	-1.91172	0.046	0.341	0	CNOT3	Inf	LyM vs PT
SLC39A11	0	-1.21551	0.104	0.399	0	SLC39A11	Inf	LyM vs PT
CCDC170	0	-2.57909	0.041	0.335	0	CCDC170	Inf	LyM vs PT
ALDH3A2	0	-1.13698	0.134	0.428	0	ALDH3A2	Inf	LyM vs PT
NOL11	0	-1.28589	0.084	0.378	0	NOL11	Inf	LyM vs PT
RBM18	0	-0.709035	0.138	0.432	0	RBM18	Inf	LyM vs PT
TOM1L1	0	-0.938927	0.14	0.434	0	TOM1L1	Inf	LyM vs PT
TRAPPC10	0	-2.92305	0.029	0.323	0	TRAPPC10	Inf	LyM vs PT
ADI1	0	-0.640919	0.142	0.435	0	ADI1	Inf	LyM vs PT
NR4A1	0	-1.98299	0.101	0.394	0	NR4A1	Inf	LyM vs PT
PVT1	0	-1.67346	0.09	0.383	0	PVT1	Inf	LyM vs PT
SMAD2	0	-1.27527	0.094	0.387	0	SMAD2	Inf	LyM vs PT
DLG5	0	-1.93549	0.072	0.365	0	DLG5	Inf	LyM vs PT
ENOPH1	0	-0.961199	0.124	0.417	0	ENOPH1	Inf	LyM vs PT
H2AFX	0	-1.88935	0.063	0.356	0	H2AFX	Inf	LyM vs PT
SERINC5	0	-2.07705	0.051	0.344	0	SERINC5	Inf	LyM vs PT
HIST1H2BE	0	-2.83751	0.03	0.322	0	HIST1H2BE	Inf	LyM vs PT
MKRN1	0	-0.622244	0.166	0.458	0	MKRN1	Inf	LyM vs PT
TOP2B	0	-0.446419	0.152	0.444	0	TOP2B	Inf	LyM vs PT
TPD52	0	3.1946264748291	0.447	0.155	0	TPD52	Inf	LyM vs PT
TRIM8	0	-0.570416	0.158	0.45	0	TRIM8	Inf	LyM vs PT
ANXA11	0	-1.04101	0.121	0.413	0	ANXA11	Inf	LyM vs PT
CBX4	0	-0.745168	0.137	0.429	0	CBX4	Inf	LyM vs PT
GLRX	0	-0.96248	0.129	0.421	0	GLRX	Inf	LyM vs PT
MIF4GD	0	-1.65702	0.076	0.368	0	MIF4GD	Inf	LyM vs PT
UBE2Z	0	-0.938771	0.121	0.413	0	UBE2Z	Inf	LyM vs PT
FH	0	-0.990614	0.112	0.403	0	FH	Inf	LyM vs PT
RPRD2	0	-1.02947	0.088	0.379	0	RPRD2	Inf	LyM vs PT
SIAH1	0	-1.11797	0.103	0.394	0	SIAH1	Inf	LyM vs PT
TPM4	0	2.96740619418668	0.82	0.529	0	TPM4	Inf	LyM vs PT
ALG8	0	-1.49158	0.091	0.381	0	ALG8	Inf	LyM vs PT
C6orf89	0	-1.08942	0.09	0.38	0	C6orf89	Inf	LyM vs PT
FAM46A	0	-1.5513	0.096	0.386	0	FAM46A	Inf	LyM vs PT
TMEM248	0	-0.715065	0.15	0.44	0	TMEM248	Inf	LyM vs PT
GANAB	0	-0.60997	0.137	0.427	0	GANAB	Inf	LyM vs PT
TBCC	0	-1.48681	0.069	0.359	0	TBCC	Inf	LyM vs PT
TIMM10	0	-0.907652	0.192	0.482	0	TIMM10	Inf	LyM vs PT
BCAM	0	-1.30272	0.111	0.4	0	BCAM	Inf	LyM vs PT
H3F3A	0	-0.637713	0.164	0.453	0	H3F3A	Inf	LyM vs PT
PRPF8	0	-2.16938	0.034	0.323	0	PRPF8	Inf	LyM vs PT
TMEM267	0	-2.4736	0.036	0.325	0	TMEM267	Inf	LyM vs PT
ANO6	0	-1.90619	0.064	0.353	0	ANO6	Inf	LyM vs PT
EFHD2	0	-0.740691	0.126	0.415	0	EFHD2	Inf	LyM vs PT
PSME3	0	-1.18216	0.125	0.414	0	PSME3	Inf	LyM vs PT
SIKE1	0	-1.42726	0.079	0.368	0	SIKE1	Inf	LyM vs PT
TNPO1	0	-0.748986	0.133	0.422	0	TNPO1	Inf	LyM vs PT
CDK9	0	-2.13098	0.039	0.327	0	CDK9	Inf	LyM vs PT
CDV3	0	-0.745323	0.169	0.457	0	CDV3	Inf	LyM vs PT
SNHG1	0	-1.32464	0.092	0.38	0	SNHG1	Inf	LyM vs PT
MCCC2	0	-0.91607	0.121	0.409	0	MCCC2	Inf	LyM vs PT
PFKL	0	-0.90392	0.131	0.419	0	PFKL	Inf	LyM vs PT
SEC16A	0	-0.588831	0.121	0.409	0	SEC16A	Inf	LyM vs PT
TSR3	0	-0.745563	0.137	0.425	0	TSR3	Inf	LyM vs PT
CNN3	0	-0.766999	0.146	0.433	0	CNN3	Inf	LyM vs PT
DAG1	0	-0.902259	0.095	0.382	0	DAG1	Inf	LyM vs PT
JMJD6	0	-1.99112	0.051	0.338	0	JMJD6	Inf	LyM vs PT
VAMP2	0	13.1611939383923	0.287	0	0	VAMP2	Inf	LyM vs PT
HUS1	0	-1.95809	0.046	0.332	0	HUS1	Inf	LyM vs PT
TM2D2	0	-1.4242	0.095	0.381	0	TM2D2	Inf	LyM vs PT
CANT1	0	-1.02115	0.132	0.418	0	CANT1	Inf	LyM vs PT
AKTIP	0	-2.10412	0.041	0.326	0	AKTIP	Inf	LyM vs PT
CARD19	0	-0.651328	0.159	0.444	0	CARD19	Inf	LyM vs PT
CDKN1C	0	-3.26074	0.037	0.322	0	CDKN1C	Inf	LyM vs PT
COX4I1	0	-0.888648	0.634	0.919	0	COX4I1	Inf	LyM vs PT
HACD2	0	-0.768506	0.153	0.438	0	HACD2	Inf	LyM vs PT
STEAP4	0	-3.45798	0.048	0.333	0	STEAP4	Inf	LyM vs PT
UCK2	0	-2.56773	0.03	0.315	0	UCK2	Inf	LyM vs PT
FBLN2	0	-3.857	0.014	0.299	0	FBLN2	Inf	LyM vs PT
TEX264	0	-0.849396	0.132	0.417	0	TEX264	Inf	LyM vs PT
TMC4	0	-0.693242	0.138	0.423	0	TMC4	Inf	LyM vs PT
EMC8	0	-1.06968	0.103	0.387	0	EMC8	Inf	LyM vs PT
NRAS	0	-2.18324	0.038	0.322	0	NRAS	Inf	LyM vs PT
ATMIN	0	-1.36523	0.07	0.354	0	ATMIN	Inf	LyM vs PT
BASP1	0	-2.5692	0.06	0.344	0	BASP1	Inf	LyM vs PT
IVNS1ABP	0	-1.40448	0.071	0.355	0	IVNS1ABP	Inf	LyM vs PT
TMPRSS2	0	-4.54307	0.009	0.293	0	TMPRSS2	Inf	LyM vs PT
CGGBP1	0	-0.70789	0.151	0.434	0	CGGBP1	Inf	LyM vs PT
ESYT2	0	-1.11615	0.101	0.384	0	ESYT2	Inf	LyM vs PT
SLC35E3	0	-1.18152	0.116	0.399	0	SLC35E3	Inf	LyM vs PT
BX284668.5	0	-1.50729	0.079	0.362	0	BX284668.5	Inf	LyM vs PT
CAB39	0	-1.51007	0.068	0.351	0	CAB39	Inf	LyM vs PT
FOXJ3	0	-1.64246	0.063	0.346	0	FOXJ3	Inf	LyM vs PT
RAB5C	0	13.0220393630372	0.283	0	0	RAB5C	Inf	LyM vs PT
AUTS2	0	-1.12339	0.11	0.392	0	AUTS2	Inf	LyM vs PT
CARHSP1	0	-0.910564	0.123	0.405	0	CARHSP1	Inf	LyM vs PT
LPP	0	-0.831497	0.152	0.434	0	LPP	Inf	LyM vs PT
PRCC	0	-0.584015	0.149	0.431	0	PRCC	Inf	LyM vs PT
TESMIN	0	-1.15144	0.103	0.385	0	TESMIN	Inf	LyM vs PT
FHL2	0	-2.13786	0.066	0.348	0	FHL2	Inf	LyM vs PT
MLX	0	-1.59311	0.08	0.362	0	MLX	Inf	LyM vs PT
NUP62	0	13.2173390744479	0.282	0	0	NUP62	Inf	LyM vs PT
OLFM1	0	-1.5487	0.064	0.346	0	OLFM1	Inf	LyM vs PT
CHD7	0	-1.17419	0.093	0.374	0	CHD7	Inf	LyM vs PT
MED14	0	-2.31949	0.035	0.316	0	MED14	Inf	LyM vs PT
NUBP2	0	-0.826573	0.148	0.429	0	NUBP2	Inf	LyM vs PT
PITRM1	0	-1.85637	0.05	0.331	0	PITRM1	Inf	LyM vs PT
PUM2	0	-0.918348	0.117	0.398	0	PUM2	Inf	LyM vs PT
PACS2	0	-2.50767	0.032	0.312	0	PACS2	Inf	LyM vs PT
PEPD	0	-0.866353	0.123	0.403	0	PEPD	Inf	LyM vs PT
TMEM254	0	-0.964213	0.104	0.384	0	TMEM254	Inf	LyM vs PT
ADD1	0	-0.835528	0.11	0.389	0	ADD1	Inf	LyM vs PT
CKLF	0	13.600004022201	0.279	0	0	CKLF	Inf	LyM vs PT
DNAJC15	0	3.39825651076379	0.404	0.125	0	DNAJC15	Inf	LyM vs PT
GCLM	0	-1.31083	0.088	0.367	0	GCLM	Inf	LyM vs PT
MED13	0	-0.82828	0.152	0.431	0	MED13	Inf	LyM vs PT
NACC1	0	-2.47109	0.03	0.309	0	NACC1	Inf	LyM vs PT
S100A9	0	3.72549483206174	0.504	0.225	0	S100A9	Inf	LyM vs PT
TAGLN2	0	-0.719322	0.629	0.908	0	TAGLN2	Inf	LyM vs PT
CNOT6L	0	-1.68939	0.065	0.344	0	CNOT6L	Inf	LyM vs PT
DNAJC1	0	2.77614576875208	0.582	0.303	0	DNAJC1	Inf	LyM vs PT
SLC35F5	0	-1.38121	0.067	0.346	0	SLC35F5	Inf	LyM vs PT
GPBP1L1	0	-0.776981	0.126	0.404	0	GPBP1L1	Inf	LyM vs PT
MON2	0	-1.50667	0.086	0.364	0	MON2	Inf	LyM vs PT
THAP11	0	-1.76431	0.054	0.332	0	THAP11	Inf	LyM vs PT
TNRC18	0	-2.46659	0.03	0.308	0	TNRC18	Inf	LyM vs PT
DNAAF5	0	-2.55214	0.023	0.301	0	DNAAF5	Inf	LyM vs PT
CNOT8	0	-1.53627	0.066	0.343	0	CNOT8	Inf	LyM vs PT
CTSF	0	-0.956965	0.11	0.387	0	CTSF	Inf	LyM vs PT
HES6	0	-2.07694	0.055	0.332	0	HES6	Inf	LyM vs PT
ABCD3	0	-1.58644	0.075	0.352	0	ABCD3	Inf	LyM vs PT
GART	0	-1.24588	0.083	0.36	0	GART	Inf	LyM vs PT
LYPLAL1	0	-0.799913	0.138	0.415	0	LYPLAL1	Inf	LyM vs PT
HMGCS1	0	-1.2244	0.09	0.366	0	HMGCS1	Inf	LyM vs PT
HMOX2	0	-1.52991	0.087	0.363	0	HMOX2	Inf	LyM vs PT
RPS10	0	12.9449642338538	0.276	0	0	RPS10	Inf	LyM vs PT
TNFAIP1	0	-1.07961	0.087	0.363	0	TNFAIP1	Inf	LyM vs PT
NSUN2	0	-0.626096	0.14	0.416	0	NSUN2	Inf	LyM vs PT
CLVS1	0	-6.76202	0.001	0.276	0	CLVS1	Inf	LyM vs PT
DENND2D	0	-1.68796	0.051	0.326	0	DENND2D	Inf	LyM vs PT
FAM104A	0	-1.0849	0.122	0.397	0	FAM104A	Inf	LyM vs PT
PPIL1	0	-1.57618	0.066	0.341	0	PPIL1	Inf	LyM vs PT
PYGO2	0	-1.85648	0.041	0.316	0	PYGO2	Inf	LyM vs PT
SAYSD1	0	-1.68304	0.06	0.335	0	SAYSD1	Inf	LyM vs PT
INTS8	0	-1.30552	0.077	0.352	0	INTS8	Inf	LyM vs PT
ALG5	0	-0.800953	0.13	0.404	0	ALG5	Inf	LyM vs PT
CDCA4	0	-2.64735	0.033	0.307	0	CDCA4	Inf	LyM vs PT
COPG1	0	-0.770222	0.11	0.384	0	COPG1	Inf	LyM vs PT
DNAJA3	0	-1.38315	0.067	0.341	0	DNAJA3	Inf	LyM vs PT
GSS	0	-1.66788	0.056	0.33	0	GSS	Inf	LyM vs PT
MYLIP	0	-1.07801	0.109	0.383	0	MYLIP	Inf	LyM vs PT
SAE1	0	-1.63414	0.068	0.342	0	SAE1	Inf	LyM vs PT
LCA5L	0	-3.29232	0.021	0.295	0	LCA5L	Inf	LyM vs PT
DAZAP1	0	-0.585279	0.13	0.403	0	DAZAP1	Inf	LyM vs PT
EIF4EBP2	0	-1.07378	0.088	0.361	0	EIF4EBP2	Inf	LyM vs PT
FOS	0	-1.02891	0.616	0.889	0	FOS	Inf	LyM vs PT
LEF1	0	-5.49155	0.006	0.279	0	LEF1	Inf	LyM vs PT
LIN7C	0	-1.39029	0.067	0.34	0	LIN7C	Inf	LyM vs PT
NPLOC4	0	-1.49326	0.062	0.335	0	NPLOC4	Inf	LyM vs PT
NUP54	0	-1.56945	0.063	0.336	0	NUP54	Inf	LyM vs PT
UBAP2	0	3.18745240963195	0.501	0.228	0	UBAP2	Inf	LyM vs PT
YY1AP1	0	-1.78255	0.048	0.321	0	YY1AP1	Inf	LyM vs PT
INPP4B	0	-1.65806	0.084	0.357	0	INPP4B	Inf	LyM vs PT
BLOC1S1	0	12.9495920305826	0.272	0	0	BLOC1S1	Inf	LyM vs PT
CHKA	0	-1.93431	0.052	0.324	0	CHKA	Inf	LyM vs PT
GRHL2	0	-1.13227	0.101	0.373	0	GRHL2	Inf	LyM vs PT
HIGD1A	0	13.1947866489037	0.272	0	0	HIGD1A	Inf	LyM vs PT
IRAK1	0	-1.90891	0.044	0.316	0	IRAK1	Inf	LyM vs PT
SMG7	0	-0.994619	0.098	0.37	0	SMG7	Inf	LyM vs PT
LRRIQ3	0	-5.21689	0.018	0.29	0	LRRIQ3	Inf	LyM vs PT
AGFG1	0	-1.22593	0.062	0.333	0	AGFG1	Inf	LyM vs PT
CDYL	0	-2.11758	0.046	0.317	0	CDYL	Inf	LyM vs PT
COMMD5	0	-1.10844	0.093	0.364	0	COMMD5	Inf	LyM vs PT
RARS2	0	-0.968995	0.111	0.382	0	RARS2	Inf	LyM vs PT
RHOT2	0	-1.36926	0.067	0.338	0	RHOT2	Inf	LyM vs PT
SLC35A2	0	-0.863339	0.108	0.379	0	SLC35A2	Inf	LyM vs PT
TNKS1BP1	0	-1.53032	0.056	0.327	0	TNKS1BP1	Inf	LyM vs PT
ATF7IP2	0	-3.09424	0.028	0.299	0	ATF7IP2	Inf	LyM vs PT
ERO1A	0	-1.16354	0.081	0.352	0	ERO1A	Inf	LyM vs PT
GMFB	0	-1.17088	0.08	0.351	0	GMFB	Inf	LyM vs PT
MED30	0	-1.35141	0.083	0.354	0	MED30	Inf	LyM vs PT
MTRR	0	-1.31148	0.074	0.345	0	MTRR	Inf	LyM vs PT
RPRD1A	0	-1.22931	0.081	0.352	0	RPRD1A	Inf	LyM vs PT
HSPA5	0	-1.84811	0.674	0.945	0	HSPA5	Inf	LyM vs PT
DCTN5	0	-1.38521	0.063	0.333	0	DCTN5	Inf	LyM vs PT
EBPL	0	-1.32052	0.104	0.374	0	EBPL	Inf	LyM vs PT
MRPL49	0	-0.846201	0.13	0.4	0	MRPL49	Inf	LyM vs PT
PEX13	0	-0.917567	0.101	0.371	0	PEX13	Inf	LyM vs PT
RLIM	0	-1.37545	0.061	0.331	0	RLIM	Inf	LyM vs PT
TFRC	0	-1.55345	0.07	0.34	0	TFRC	Inf	LyM vs PT
VPS41	0	-0.839303	0.126	0.396	0	VPS41	Inf	LyM vs PT
FAF1	0	-2.69877	0.028	0.298	0	FAF1	Inf	LyM vs PT
MEGF9	0	-1.28049	0.076	0.346	0	MEGF9	Inf	LyM vs PT
MSH2	0	-0.947656	0.096	0.365	0	MSH2	Inf	LyM vs PT
NUP98	0	-2.45917	0.031	0.3	0	NUP98	Inf	LyM vs PT
UBE2J2	0	-0.90749	0.103	0.372	0	UBE2J2	Inf	LyM vs PT
ZFAND2A	0	-2.41658	0.072	0.341	0	ZFAND2A	Inf	LyM vs PT
BSPRY	0	-0.847777	0.144	0.412	0	BSPRY	Inf	LyM vs PT
COMMD10	0	-1.24249	0.095	0.363	0	COMMD10	Inf	LyM vs PT
HIBADH	0	-1.28145	0.092	0.36	0	HIBADH	Inf	LyM vs PT
HYOU1	0	-1.57032	0.057	0.325	0	HYOU1	Inf	LyM vs PT
IGSF8	0	-1.38574	0.088	0.356	0	IGSF8	Inf	LyM vs PT
IMP4	0	-0.730973	0.129	0.397	0	IMP4	Inf	LyM vs PT
KRT23	0	-1.88995	0.099	0.367	0	KRT23	Inf	LyM vs PT
MICU2	0	-1.25731	0.092	0.36	0	MICU2	Inf	LyM vs PT
NLRP2	0	-5.73664	0.003	0.271	0	NLRP2	Inf	LyM vs PT
PRPF31	0	-0.875123	0.111	0.379	0	PRPF31	Inf	LyM vs PT
SKAP1	0	-2.66305	0.031	0.299	0	SKAP1	Inf	LyM vs PT
STX12	0	-1.56648	0.063	0.331	0	STX12	Inf	LyM vs PT
TIMP3	0	-2.40462	0.033	0.301	0	TIMP3	Inf	LyM vs PT
TRIM37	0	-0.944497	0.11	0.378	0	TRIM37	Inf	LyM vs PT
ZBTB10	0	-1.38765	0.106	0.374	0	ZBTB10	Inf	LyM vs PT
ZNF131	0	-1.04999	0.096	0.364	0	ZNF131	Inf	LyM vs PT
CTSL	0	-0.834774	0.13	0.397	0	CTSL	Inf	LyM vs PT
GATAD2A	0	-1.3742	0.101	0.368	0	GATAD2A	Inf	LyM vs PT
NCOA3	0	-0.867511	0.114	0.381	0	NCOA3	Inf	LyM vs PT
SUPT4H1	0	12.8931196131961	0.267	0	0	SUPT4H1	Inf	LyM vs PT
WWOX	0	-2.21647	0.073	0.34	0	WWOX	Inf	LyM vs PT
ATF2	0	-1.09569	0.082	0.349	0	ATF2	Inf	LyM vs PT
DDHD2	0	-2.50614	0.029	0.296	0	DDHD2	Inf	LyM vs PT
USF2	0	-1.12847	0.084	0.351	0	USF2	Inf	LyM vs PT
APPBP2	0	-1.12969	0.091	0.357	0	APPBP2	Inf	LyM vs PT
ARRDC1	0	13.1237138889855	0.266	0	0	ARRDC1	Inf	LyM vs PT
ASS1	0	-1.36716	0.122	0.388	0	ASS1	Inf	LyM vs PT
GLS	0	-2.18455	0.039	0.305	0	GLS	Inf	LyM vs PT
GOLT1B	0	-1.27167	0.074	0.34	0	GOLT1B	Inf	LyM vs PT
MCM4	0	-1.25873	0.115	0.381	0	MCM4	Inf	LyM vs PT
RNF139	0	-0.851423	0.112	0.378	0	RNF139	Inf	LyM vs PT
ALKBH5	0	-1.96207	0.047	0.312	0	ALKBH5	Inf	LyM vs PT
GMDS	0	-1.75928	0.059	0.324	0	GMDS	Inf	LyM vs PT
LPAR2	0	-2.20616	0.041	0.306	0	LPAR2	Inf	LyM vs PT
MGAT2	0	-2.01683	0.041	0.306	0	MGAT2	Inf	LyM vs PT
MRPS30-DT	0	-2.5072	0.059	0.324	0	MRPS30-DT	Inf	LyM vs PT
PTGES2	0	-0.966508	0.102	0.367	0	PTGES2	Inf	LyM vs PT
SRSF8	0	-1.21249	0.072	0.337	0	SRSF8	Inf	LyM vs PT
CELSR2	0	-1.17407	0.081	0.346	0	CELSR2	Inf	LyM vs PT
CEACAM6	0	2.74157805785432	0.666	0.402	0	CEACAM6	Inf	LyM vs PT
COA5	0	-0.784987	0.118	0.382	0	COA5	Inf	LyM vs PT
FPGS	0	-1.49014	0.053	0.317	0	FPGS	Inf	LyM vs PT
PRR15L	0	-1.21971	0.126	0.39	0	PRR15L	Inf	LyM vs PT
TMC5	0	4.32996055824162	0.356	0.092	0	TMC5	Inf	LyM vs PT
TRAK2	0	-1.77286	0.052	0.316	0	TRAK2	Inf	LyM vs PT
ACTR1A	0	-1.15524	0.08	0.344	0	ACTR1A	Inf	LyM vs PT
GGCX	0	-1.31662	0.08	0.344	0	GGCX	Inf	LyM vs PT
AP3M1	0	-1.19703	0.079	0.342	0	AP3M1	Inf	LyM vs PT
MAPK9	0	-1.82112	0.049	0.312	0	MAPK9	Inf	LyM vs PT
STXBP1	0	-1.73745	0.052	0.315	0	STXBP1	Inf	LyM vs PT
YTHDF1	0	-0.667954	0.121	0.384	0	YTHDF1	Inf	LyM vs PT
ZFPM1	0	-4.13408	0.006	0.269	0	ZFPM1	Inf	LyM vs PT
HIST1H3H	0	-0.930837	0.127	0.389	0	HIST1H3H	Inf	LyM vs PT
MAD2L1BP	0	-2.2569	0.037	0.299	0	MAD2L1BP	Inf	LyM vs PT
OSGIN2	0	-1.42456	0.065	0.327	0	OSGIN2	Inf	LyM vs PT
RIPK1	0	-2.47851	0.031	0.293	0	RIPK1	Inf	LyM vs PT
RYK	0	-1.45428	0.052	0.314	0	RYK	Inf	LyM vs PT
SEC23IP	0	-1.0615	0.092	0.354	0	SEC23IP	Inf	LyM vs PT
HLA-B	0	-1.03147	0.559	0.821	0	HLA-B	Inf	LyM vs PT
AKIRIN2	0	-1.20675	0.086	0.347	0	AKIRIN2	Inf	LyM vs PT
BEX3	0	8.16173308447835	0.265	0.004	0	BEX3	Inf	LyM vs PT
CIZ1	0	-1.55853	0.049	0.31	0	CIZ1	Inf	LyM vs PT
FARSB	0	-0.836527	0.117	0.378	0	FARSB	Inf	LyM vs PT
RHOH	0	-3.92426	0.023	0.284	0	RHOH	Inf	LyM vs PT
AKAP1	0	-0.744164	0.107	0.367	0	AKAP1	Inf	LyM vs PT
CDR2	0	-2.4215	0.03	0.29	0	CDR2	Inf	LyM vs PT
CFD	0	-0.5982	0.134	0.394	0	CFD	Inf	LyM vs PT
CUL1	0	-1.14811	0.083	0.343	0	CUL1	Inf	LyM vs PT
ESRRA	0	-1.65872	0.051	0.311	0	ESRRA	Inf	LyM vs PT
NCOA2	0	-1.34584	0.08	0.34	0	NCOA2	Inf	LyM vs PT
NUP58	0	-0.938188	0.097	0.357	0	NUP58	Inf	LyM vs PT
ODF2	0	-1.79807	0.039	0.299	0	ODF2	Inf	LyM vs PT
PEF1	0	-1.00223	0.096	0.356	0	PEF1	Inf	LyM vs PT
ZNF83	0	-0.919925	0.106	0.366	0	ZNF83	Inf	LyM vs PT
MYO1D	0	-2.71995	0.022	0.282	0	MYO1D	Inf	LyM vs PT
GTF3C1	0	-1.44454	0.057	0.316	0	GTF3C1	Inf	LyM vs PT
PIP4K2B	0	-2.13627	0.037	0.296	0	PIP4K2B	Inf	LyM vs PT
PRPF3	0	-0.74708	0.107	0.366	0	PRPF3	Inf	LyM vs PT
ADAM10	0	-0.722297	0.116	0.374	0	ADAM10	Inf	LyM vs PT
FAM199X	0	-1.17735	0.076	0.334	0	FAM199X	Inf	LyM vs PT
GOLGA7	0	-0.779233	0.116	0.374	0	GOLGA7	Inf	LyM vs PT
RAB30-AS1	0	-1.0358	0.112	0.37	0	RAB30-AS1	Inf	LyM vs PT
RIPK4	0	-5.36949	0.005	0.263	0	RIPK4	Inf	LyM vs PT
TACC2	0	-1.65664	0.057	0.315	0	TACC2	Inf	LyM vs PT
TRIM33	0	-1.24391	0.079	0.337	0	TRIM33	Inf	LyM vs PT
UBE2D1	0	-0.854912	0.107	0.365	0	UBE2D1	Inf	LyM vs PT
AP1G1	0	-0.650956	0.112	0.369	0	AP1G1	Inf	LyM vs PT
C16orf91	0	-1.1988	0.085	0.342	0	C16orf91	Inf	LyM vs PT
NAA30	0	-2.24652	0.034	0.291	0	NAA30	Inf	LyM vs PT
QARS	0	-1.05848	0.073	0.33	0	QARS	Inf	LyM vs PT
RABIF	0	-0.828457	0.111	0.368	0	RABIF	Inf	LyM vs PT
RGS2	0	-4.80324	0.011	0.268	0	RGS2	Inf	LyM vs PT
RNF19B	0	-4.05241	0.011	0.268	0	RNF19B	Inf	LyM vs PT
AC005225.2	0	-6.84577	0.001	0.257	0	AC005225.2	Inf	LyM vs PT
ARID1A	0	-0.738248	0.121	0.377	0	ARID1A	Inf	LyM vs PT
ATP5MPL	0	-0.679178	0.664	0.92	0	ATP5MPL	Inf	LyM vs PT
ATP5PD	0	-0.594713	0.634	0.89	0	ATP5PD	Inf	LyM vs PT
BCAS3	0	-2.08622	0.044	0.3	0	BCAS3	Inf	LyM vs PT
FAM20B	0	-1.98607	0.038	0.294	0	FAM20B	Inf	LyM vs PT
FOXP1	0	3.14983048022735	0.412	0.156	0	FOXP1	Inf	LyM vs PT
MPV17L2	0	-2.32235	0.036	0.292	0	MPV17L2	Inf	LyM vs PT
NDRG1	0	-1.66399	0.075	0.331	0	NDRG1	Inf	LyM vs PT
NEDD4L	0	-1.20548	0.085	0.341	0	NEDD4L	Inf	LyM vs PT
PQLC3	0	-0.924069	0.126	0.382	0	PQLC3	Inf	LyM vs PT
RAB21	0	-0.75794	0.121	0.377	0	RAB21	Inf	LyM vs PT
RCHY1	0	-1.72401	0.055	0.311	0	RCHY1	Inf	LyM vs PT
SYVN1	0	-1.35737	0.062	0.318	0	SYVN1	Inf	LyM vs PT
TPRG1	0	-3.36542	0.024	0.28	0	TPRG1	Inf	LyM vs PT
C16orf87	0	-0.957502	0.091	0.346	0	C16orf87	Inf	LyM vs PT
FBL	0	-0.793449	0.118	0.373	0	FBL	Inf	LyM vs PT
ID1	0	-1.29414	0.088	0.343	0	ID1	Inf	LyM vs PT
KCNC2	0	-6.18502	0.007	0.262	0	KCNC2	Inf	LyM vs PT
OGT	0	-1.43132	0.048	0.303	0	OGT	Inf	LyM vs PT
TOR2A	0	-1.38523	0.066	0.321	0	TOR2A	Inf	LyM vs PT
FLII	0	-0.906641	0.114	0.368	0	FLII	Inf	LyM vs PT
HOXB3	0	-2.88254	0.02	0.274	0	HOXB3	Inf	LyM vs PT
IARS	0	-0.641675	0.116	0.37	0	IARS	Inf	LyM vs PT
LRRC41	0	-1.22306	0.066	0.32	0	LRRC41	Inf	LyM vs PT
MTHFD2L	0	-1.09461	0.105	0.359	0	MTHFD2L	Inf	LyM vs PT
NUDT4	0	2.85925004993383	0.446	0.192	0	NUDT4	Inf	LyM vs PT
PEX11A	0	-1.36803	0.123	0.377	0	PEX11A	Inf	LyM vs PT
PGAM1	0	-1.55834	0.062	0.316	0	PGAM1	Inf	LyM vs PT
PPP3CB	0	-1.30998	0.071	0.325	0	PPP3CB	Inf	LyM vs PT
TMEM238	0	-2.41495	0.031	0.285	0	TMEM238	Inf	LyM vs PT
TMEM63B	0	-1.65451	0.052	0.306	0	TMEM63B	Inf	LyM vs PT
YIF1B	0	-0.922901	0.104	0.358	0	YIF1B	Inf	LyM vs PT
IMPA2	0	-2.37622	0.043	0.296	0	IMPA2	Inf	LyM vs PT
MFSD14B	0	-1.24674	0.058	0.311	0	MFSD14B	Inf	LyM vs PT
RSPRY1	0	-1.51686	0.065	0.318	0	RSPRY1	Inf	LyM vs PT
SCG3	0	-13.0892	0	0.253	0	SCG3	Inf	LyM vs PT
SPIN2B	0	-2.88363	0.025	0.278	0	SPIN2B	Inf	LyM vs PT
THAP5	0	12.8557929561927	0.253	0	0	THAP5	Inf	LyM vs PT
ZC3HAV1	0	-1.14918	0.087	0.34	0	ZC3HAV1	Inf	LyM vs PT
ZDHHC7	0	-2.23997	0.028	0.281	0	ZDHHC7	Inf	LyM vs PT
ALDH18A1	0	-1.07521	0.068	0.32	0	ALDH18A1	Inf	LyM vs PT
ARRDC2	0	-3.96829	0.011	0.263	0	ARRDC2	Inf	LyM vs PT
BCAT2	0	-1.29926	0.079	0.331	0	BCAT2	Inf	LyM vs PT
MRS2	0	-1.7543	0.048	0.3	0	MRS2	Inf	LyM vs PT
MUT	0	-1.06906	0.083	0.335	0	MUT	Inf	LyM vs PT
PIP5K1A	0	-1.63031	0.045	0.297	0	PIP5K1A	Inf	LyM vs PT
SSBP4	0	-1.04597	0.103	0.355	0	SSBP4	Inf	LyM vs PT
DUSP10	0	-1.51276	0.067	0.318	0	DUSP10	Inf	LyM vs PT
NFYC	0	-1.35483	0.064	0.315	0	NFYC	Inf	LyM vs PT
NOTCH2	0	-1.98795	0.056	0.307	0	NOTCH2	Inf	LyM vs PT
PIM1	0	-4.24118	0.01	0.261	0	PIM1	Inf	LyM vs PT
TANC1	0	-2.38096	0.023	0.274	0	TANC1	Inf	LyM vs PT
TPRG1L	0	-1.2098	0.074	0.325	0	TPRG1L	Inf	LyM vs PT
USP24	0	-2.98896	0.03	0.281	0	USP24	Inf	LyM vs PT
VPS13B	0	-1.66489	0.062	0.313	0	VPS13B	Inf	LyM vs PT
ARPC1A	0	12.7313447374668	0.25	0	0	ARPC1A	Inf	LyM vs PT
BACE2	0	-1.46887	0.084	0.334	0	BACE2	Inf	LyM vs PT
C21orf59	0	12.7713299251424	0.25	0	0	C21orf59	Inf	LyM vs PT
CD59	0	5.67979786844091	0.26	0.01	0	CD59	Inf	LyM vs PT
GSK3A	0	-1.39998	0.059	0.309	0	GSK3A	Inf	LyM vs PT
NNT	0	-2.66615	0.025	0.275	0	NNT	Inf	LyM vs PT
PLAT	0	-2.03865	0.059	0.309	0	PLAT	Inf	LyM vs PT
SMIM7	0	12.7844036024297	0.25	0	0	SMIM7	Inf	LyM vs PT
ZNF281	0	-0.706157	0.113	0.363	0	ZNF281	Inf	LyM vs PT
ZNF622	0	-1.24879	0.074	0.324	0	ZNF622	Inf	LyM vs PT
NDUFAF4	0	-1.00407	0.089	0.338	0	NDUFAF4	Inf	LyM vs PT
PPP4R3A	0	-0.817486	0.094	0.343	0	PPP4R3A	Inf	LyM vs PT
RBM15B	0	-2.16148	0.026	0.275	0	RBM15B	Inf	LyM vs PT
ANKRD37	0	-1.62688	0.071	0.32	0	ANKRD37	Inf	LyM vs PT
APIP	0	-0.87403	0.119	0.368	0	APIP	Inf	LyM vs PT
CCDC117	0	-1.45621	0.083	0.332	0	CCDC117	Inf	LyM vs PT
GNA13	0	-1.68258	0.043	0.292	0	GNA13	Inf	LyM vs PT
KAT7	0	-1.08175	0.082	0.331	0	KAT7	Inf	LyM vs PT
NFKB1	0	-1.8376	0.053	0.302	0	NFKB1	Inf	LyM vs PT
PPP2CA	0	12.7540565582792	0.249	0	0	PPP2CA	Inf	LyM vs PT
SNX1	0	-0.872698	0.104	0.353	0	SNX1	Inf	LyM vs PT
ST14	0	-1.17756	0.066	0.315	0	ST14	Inf	LyM vs PT
TUFT1	0	-2.99589	0.02	0.268	0	TUFT1	Inf	LyM vs PT
C6orf226	0	-1.43635	0.07	0.318	0	C6orf226	Inf	LyM vs PT
CHMP1A	0	-0.73235	0.105	0.353	0	CHMP1A	Inf	LyM vs PT
DLG1	0	-1.3804	0.072	0.32	0	DLG1	Inf	LyM vs PT
FXYD5	0	-1.12987	0.08	0.328	0	FXYD5	Inf	LyM vs PT
GIPC1	0	-0.671369	0.107	0.355	0	GIPC1	Inf	LyM vs PT
MANBAL	0	-1.10488	0.082	0.33	0	MANBAL	Inf	LyM vs PT
RAPH1	0	-1.40185	0.062	0.31	0	RAPH1	Inf	LyM vs PT
TMED5	0	-1.19395	0.076	0.324	0	TMED5	Inf	LyM vs PT
TMEM45A	0	2.99372106114405	0.363	0.115	0	TMEM45A	Inf	LyM vs PT
RFXANK	0	-1.00646	0.101	0.349	0	RFXANK	Inf	LyM vs PT
SLC7A5	0	-1.9827	0.038	0.286	0	SLC7A5	Inf	LyM vs PT
FLAD1	0	-0.752802	0.089	0.336	0	FLAD1	Inf	LyM vs PT
RAB9A	0	-1.09964	0.087	0.334	0	RAB9A	Inf	LyM vs PT
TPMT	0	-1.15077	0.083	0.33	0	TPMT	Inf	LyM vs PT
BCKDK	0	-0.909162	0.098	0.345	0	BCKDK	Inf	LyM vs PT
APP	0	-1.59604	0.341	0.588	0	APP	Inf	LyM vs PT
EIF2D	0	-2.46919	0.025	0.271	0	EIF2D	Inf	LyM vs PT
CELSR1	0	-1.23761	0.071	0.317	0	CELSR1	Inf	LyM vs PT
CHP1	0	-0.752429	0.109	0.355	0	CHP1	Inf	LyM vs PT
MSX2	0	-3.39672	0.016	0.262	0	MSX2	Inf	LyM vs PT
NARF	0	-1.3436	0.061	0.307	0	NARF	Inf	LyM vs PT
TACSTD2	0	-0.915284	0.697	0.943	0	TACSTD2	Inf	LyM vs PT
ZNF90	0	-4.2559	0.006	0.252	0	ZNF90	Inf	LyM vs PT
AAGAB	0	-0.822611	0.101	0.347	0	AAGAB	Inf	LyM vs PT
WDR46	0	-1.84383	0.039	0.285	0	WDR46	Inf	LyM vs PT
DNAJB9	0	-0.951518	0.096	0.341	0	DNAJB9	Inf	LyM vs PT
HMCES	0	-2.02941	0.033	0.278	0	HMCES	Inf	LyM vs PT
OCRL	0	-2.57056	0.021	0.266	0	OCRL	Inf	LyM vs PT
AK4	0	-1.71026	0.055	0.3	0	AK4	Inf	LyM vs PT
CPSF7	0	-1.09058	0.075	0.32	0	CPSF7	Inf	LyM vs PT
OSER1	0	-0.88374	0.108	0.353	0	OSER1	Inf	LyM vs PT
PRKCD	0	-0.599724	0.107	0.352	0	PRKCD	Inf	LyM vs PT
PAM	0	-2.38869	0.032	0.276	0	PAM	Inf	LyM vs PT
HELZ	0	-1.06495	0.081	0.325	0	HELZ	Inf	LyM vs PT
OTUD5	0	-1.52728	0.05	0.294	0	OTUD5	Inf	LyM vs PT
ALG13	0	-0.936116	0.097	0.34	0	ALG13	Inf	LyM vs PT
BRF1	0	-2.40917	0.027	0.27	0	BRF1	Inf	LyM vs PT
ETNK1	0	-0.807202	0.098	0.341	0	ETNK1	Inf	LyM vs PT
GATA3-AS1	0	-1.01329	0.093	0.336	0	GATA3-AS1	Inf	LyM vs PT
GCLC	0	-3.02117	0.02	0.263	0	GCLC	Inf	LyM vs PT
ABT1	0	-1.12956	0.073	0.316	0	ABT1	Inf	LyM vs PT
BPHL	0	-1.29432	0.075	0.318	0	BPHL	Inf	LyM vs PT
CLDN4	0	-1.18097	0.677	0.92	0	CLDN4	Inf	LyM vs PT
COBL	0	-1.35188	0.072	0.315	0	COBL	Inf	LyM vs PT
IDE	0	-1.54605	0.052	0.295	0	IDE	Inf	LyM vs PT
IRS1	0	-2.06124	0.05	0.293	0	IRS1	Inf	LyM vs PT
LYRM1	0	-1.41248	0.059	0.302	0	LYRM1	Inf	LyM vs PT
MED8	0	-1.26491	0.069	0.312	0	MED8	Inf	LyM vs PT
PFN2	0	3.46606385259685	0.345	0.102	0	PFN2	Inf	LyM vs PT
PI4KB	0	-1.28331	0.06	0.303	0	PI4KB	Inf	LyM vs PT
WASHC5	0	-1.54142	0.055	0.298	0	WASHC5	Inf	LyM vs PT
ZC3H12A	0	-1.45621	0.066	0.309	0	ZC3H12A	Inf	LyM vs PT
PIGK	0	-1.80619	0.042	0.285	0	PIGK	Inf	LyM vs PT
RC3H2	0	-1.81082	0.041	0.284	0	RC3H2	Inf	LyM vs PT
COG2	0	-0.929519	0.094	0.336	0	COG2	Inf	LyM vs PT
VOPP1	0	-0.895134	0.092	0.334	0	VOPP1	Inf	LyM vs PT
GCA	0	-1.35427	0.063	0.305	0	GCA	Inf	LyM vs PT
SCYL1	0	-1.14376	0.074	0.316	0	SCYL1	Inf	LyM vs PT
SELENOH	0	12.7162024606243	0.242	0	0	SELENOH	Inf	LyM vs PT
SLC27A2	0	-3.70564	0.011	0.253	0	SLC27A2	Inf	LyM vs PT
TBC1D9B	0	-1.70906	0.043	0.285	0	TBC1D9B	Inf	LyM vs PT
WDYHV1	0	-1.80266	0.068	0.31	0	WDYHV1	Inf	LyM vs PT
WRNIP1	0	-1.53341	0.046	0.288	0	WRNIP1	Inf	LyM vs PT
SEH1L	0	-2.29027	0.025	0.266	0	SEH1L	Inf	LyM vs PT
COP1	0	-1.15188	0.077	0.318	0	COP1	Inf	LyM vs PT
IRF2BPL	0	-1.09754	0.08	0.321	0	IRF2BPL	Inf	LyM vs PT
NANOS1	0	-3.35605	0.014	0.255	0	NANOS1	Inf	LyM vs PT
NDUFB8	0	12.6780809060358	0.241	0	0	NDUFB8	Inf	LyM vs PT
PLOD2	0	-1.14284	0.12	0.361	0	PLOD2	Inf	LyM vs PT
TSEN54	0	-1.70526	0.054	0.295	0	TSEN54	Inf	LyM vs PT
NSMCE4A	0	-1.00093	0.088	0.328	0	NSMCE4A	Inf	LyM vs PT
SBF2	0	-2.1483	0.036	0.276	0	SBF2	Inf	LyM vs PT
NDRG3	0	-1.17178	0.068	0.308	0	NDRG3	Inf	LyM vs PT
TFAP2C	0	-0.966836	0.107	0.347	0	TFAP2C	Inf	LyM vs PT
AC027644.3	0	-0.947444	0.088	0.327	0	AC027644.3	Inf	LyM vs PT
TMEM101	0	-2.00486	0.037	0.276	0	TMEM101	Inf	LyM vs PT
HSPA2	0	-2.05604	0.043	0.282	0	HSPA2	Inf	LyM vs PT
LDB1	0	-2.78296	0.017	0.256	0	LDB1	Inf	LyM vs PT
PRPF38A	0	-1.2356	0.067	0.306	0	PRPF38A	Inf	LyM vs PT
RNF113A	0	-1.38385	0.06	0.299	0	RNF113A	Inf	LyM vs PT
KLHL7	0	-2.86157	0.021	0.259	0	KLHL7	Inf	LyM vs PT
RETREG2	0	-0.748329	0.101	0.339	0	RETREG2	Inf	LyM vs PT
RSPH1	0	-2.71831	0.032	0.27	0	RSPH1	Inf	LyM vs PT
DERA	0	-1.30927	0.065	0.303	0	DERA	Inf	LyM vs PT
RHOD	0	-1.26372	0.075	0.313	0	RHOD	Inf	LyM vs PT
SEMA3E	0	5.18718470843751	0.255	0.017	0	SEMA3E	Inf	LyM vs PT
TM9SF4	0	-1.06696	0.076	0.314	0	TM9SF4	Inf	LyM vs PT
UBE2D4	0	-1.56313	0.052	0.29	0	UBE2D4	Inf	LyM vs PT
BTBD1	0	-2.01423	0.035	0.272	0	BTBD1	Inf	LyM vs PT
EXOSC6	0	-2.27495	0.025	0.262	0	EXOSC6	Inf	LyM vs PT
COBLL1	0	-1.14424	0.073	0.31	0	COBLL1	Inf	LyM vs PT
COMMD3	0	12.7398271565038	0.237	0	0	COMMD3	Inf	LyM vs PT
GPC3	0	-7.39848	0.001	0.238	0	GPC3	Inf	LyM vs PT
KLHDC3	0	-1.09033	0.081	0.318	0	KLHDC3	Inf	LyM vs PT
LGALS1	0	2.8649208050749	0.591	0.354	0	LGALS1	Inf	LyM vs PT
SLC10A3	0	-1.48812	0.061	0.298	0	SLC10A3	Inf	LyM vs PT
SH3BGRL	0	1.96922554145896	0.678	0.442	0	SH3BGRL	Inf	LyM vs PT
EHD1	0	-2.25506	0.03	0.266	0	EHD1	Inf	LyM vs PT
RTL8B	0	-1.99193	0.04	0.276	0	RTL8B	Inf	LyM vs PT
ATP23	0	-1.56371	0.056	0.292	0	ATP23	Inf	LyM vs PT
MRPL44	0	-1.09954	0.078	0.314	0	MRPL44	Inf	LyM vs PT
PET100	0	12.6572108235292	0.236	0	0	PET100	Inf	LyM vs PT
RERGL	0	-10.4055	0.001	0.237	0	RERGL	Inf	LyM vs PT
USP32	0	-3.07414	0.017	0.253	0	USP32	Inf	LyM vs PT
ZBTB11	0	-1.56136	0.052	0.288	0	ZBTB11	Inf	LyM vs PT
ENDOG	0	-2.38187	0.031	0.266	0	ENDOG	Inf	LyM vs PT
MMP24OS	0	4.62351017860537	0.264	0.029	0	MMP24OS	Inf	LyM vs PT
NR4A2	0	-0.988792	0.097	0.332	0	NR4A2	Inf	LyM vs PT
PHC2	0	-2.58227	0.022	0.257	0	PHC2	Inf	LyM vs PT
XPNPEP1	0	-1.9521	0.04	0.275	0	XPNPEP1	Inf	LyM vs PT
E2F4	0	-0.719509	0.082	0.317	0	E2F4	Inf	LyM vs PT
HNRNPA2B1	0	-1.32392	0.736	0.971	0	HNRNPA2B1	Inf	LyM vs PT
PTP4A2	0	3.6036164217225	0.31	0.075	0	PTP4A2	Inf	LyM vs PT
TAF9B	0	-1.60533	0.051	0.286	0	TAF9B	Inf	LyM vs PT
FOSL2	0	-1.72562	0.043	0.277	0	FOSL2	Inf	LyM vs PT
AFF1	0	-0.993844	0.097	0.331	0	AFF1	Inf	LyM vs PT
CSRNP1	0	-2.77688	0.022	0.256	0	CSRNP1	Inf	LyM vs PT
HDHD3	0	-0.932222	0.095	0.329	0	HDHD3	Inf	LyM vs PT
HIPK1	0	-2.0955	0.031	0.265	0	HIPK1	Inf	LyM vs PT
TIA1	0	12.770162827232	0.234	0	0	TIA1	Inf	LyM vs PT
MGAT4B	0	-1.17895	0.057	0.291	0	MGAT4B	Inf	LyM vs PT
RBM24	0	-7.12951	0.001	0.235	0	RBM24	Inf	LyM vs PT
TP53BP2	0	-1.55791	0.055	0.289	0	TP53BP2	Inf	LyM vs PT
DYM	0	-1.73566	0.048	0.281	0	DYM	Inf	LyM vs PT
WIPI1	0	-1.69448	0.044	0.277	0	WIPI1	Inf	LyM vs PT
G6PD	0	-0.830329	0.092	0.325	0	G6PD	Inf	LyM vs PT
KIAA1522	0	-0.85522	0.09	0.323	0	KIAA1522	Inf	LyM vs PT
AP001207.3	0	-3.75876	0.01	0.243	0	AP001207.3	Inf	LyM vs PT
AP5M1	0	-1.17624	0.065	0.298	0	AP5M1	Inf	LyM vs PT
PPP1R13B	0	-3.26057	0.017	0.25	0	PPP1R13B	Inf	LyM vs PT
WFDC2	0	-1.53913	0.122	0.355	0	WFDC2	Inf	LyM vs PT
GRAMD1A	0	-0.9351	0.088	0.32	0	GRAMD1A	Inf	LyM vs PT
PGM1	0	-1.84965	0.042	0.274	0	PGM1	Inf	LyM vs PT
ROBO2	0	-4.19361	0.019	0.251	0	ROBO2	Inf	LyM vs PT
TUBA4A	0	-1.66204	0.094	0.326	0	TUBA4A	Inf	LyM vs PT
PAK4	0	-1.27535	0.056	0.288	0	PAK4	Inf	LyM vs PT
SYCP2	0	2.51097666838191	0.604	0.372	0	SYCP2	Inf	LyM vs PT
EPS15	0	-1.70246	0.046	0.277	0	EPS15	Inf	LyM vs PT
CSTA	0	4.43423995480017	0.318	0.087	0	CSTA	Inf	LyM vs PT
IER3IP1	0	12.616653873805	0.231	0	0	IER3IP1	Inf	LyM vs PT
PMP22	0	6.35620069335396	0.251	0.02	0	PMP22	Inf	LyM vs PT
UBR2	0	-1.05823	0.086	0.317	0	UBR2	Inf	LyM vs PT
SLC39A9	0	-1.28643	0.061	0.292	0	SLC39A9	Inf	LyM vs PT
STARD3NL	0	-1.0408	0.084	0.315	0	STARD3NL	Inf	LyM vs PT
TEX2	0	-1.0913	0.066	0.297	0	TEX2	Inf	LyM vs PT
PDE6D	0	-1.49336	0.05	0.28	0	PDE6D	Inf	LyM vs PT
FAAH2	0	-2.46144	0.03	0.26	0	FAAH2	Inf	LyM vs PT
HILPDA	0	12.9863046407915	0.23	0	0	HILPDA	Inf	LyM vs PT
POLR3E	0	-1.63675	0.041	0.271	0	POLR3E	Inf	LyM vs PT
SMARCC2	0	12.7477652778219	0.23	0	0	SMARCC2	Inf	LyM vs PT
ZBTB41	0	-0.800885	0.09	0.32	0	ZBTB41	Inf	LyM vs PT
BRAT1	0	-1.51537	0.052	0.282	0	BRAT1	Inf	LyM vs PT
RTCA	0	-1.176	0.074	0.304	0	RTCA	Inf	LyM vs PT
STK24	0	-1.28796	0.053	0.283	0	STK24	Inf	LyM vs PT
STX5	0	-1.11313	0.076	0.306	0	STX5	Inf	LyM vs PT
FZD6	0	-1.6403	0.051	0.28	0	FZD6	Inf	LyM vs PT
GOLGB1	0	2.33606287344493	0.774	0.545	0	GOLGB1	Inf	LyM vs PT
MAT2B	0	-0.950811	0.085	0.314	0	MAT2B	Inf	LyM vs PT
PCSK1N	0	6.45024816810915	0.241	0.012	0	PCSK1N	Inf	LyM vs PT
PMPCA	0	-1.10095	0.068	0.297	0	PMPCA	Inf	LyM vs PT
TBRG4	0	-1.63476	0.042	0.27	0	TBRG4	Inf	LyM vs PT
PSMG1	0	-1.08898	0.069	0.297	0	PSMG1	Inf	LyM vs PT
FAM122B	0	-1.70305	0.041	0.268	0	FAM122B	Inf	LyM vs PT
RNF14	0	-1.73435	0.042	0.269	0	RNF14	Inf	LyM vs PT
UBXN2B	0	-1.79335	0.033	0.26	0	UBXN2B	Inf	LyM vs PT
CISH	0	-1.30075	0.066	0.293	0	CISH	Inf	LyM vs PT
DPCD	0	-1.11003	0.078	0.305	0	DPCD	Inf	LyM vs PT
RRNAD1	0	-0.987999	0.078	0.305	0	RRNAD1	Inf	LyM vs PT
SEC14L1	0	-1.19646	0.082	0.309	0	SEC14L1	Inf	LyM vs PT
SIX4	0	-1.04823	0.079	0.306	0	SIX4	Inf	LyM vs PT
DYRK1A	0	-1.80474	0.045	0.271	0	DYRK1A	Inf	LyM vs PT
RHBDD1	0	-2.61035	0.021	0.247	0	RHBDD1	Inf	LyM vs PT
SDCCAG3	0	-2.34473	0.02	0.246	0	SDCCAG3	Inf	LyM vs PT
ARF1	0	-0.586185	0.686	0.912	0	ARF1	Inf	LyM vs PT
CCNO	0	-2.02912	0.037	0.262	0	CCNO	Inf	LyM vs PT
HAUS1	0	-1.03531	0.087	0.312	0	HAUS1	Inf	LyM vs PT
HOXB-AS3	0	-5.15032	0.003	0.228	0	HOXB-AS3	Inf	LyM vs PT
SLC25A25	0	-2.59494	0.026	0.251	0	SLC25A25	Inf	LyM vs PT
APEH	0	-1.20448	0.06	0.285	0	APEH	Inf	LyM vs PT
SIRT7	0	-1.16678	0.064	0.289	0	SIRT7	Inf	LyM vs PT
SNX30	0	-3.05699	0.014	0.239	0	SNX30	Inf	LyM vs PT
SPG7	0	-0.985859	0.073	0.298	0	SPG7	Inf	LyM vs PT
TDRKH	0	-2.66355	0.017	0.242	0	TDRKH	Inf	LyM vs PT
LARP7	0	2.38586483100861	0.671	0.447	0	LARP7	Inf	LyM vs PT
TVP23B	0	-1.83716	0.044	0.268	0	TVP23B	Inf	LyM vs PT
WDR24	0	-2.12112	0.046	0.27	0	WDR24	Inf	LyM vs PT
CLIC6	0	-4.97854	0.008	0.232	0	CLIC6	Inf	LyM vs PT
F8A1	0	-2.46479	0.023	0.247	0	F8A1	Inf	LyM vs PT
MAP2K1	0	-1.62974	0.038	0.262	0	MAP2K1	Inf	LyM vs PT
NFATC4	0	6.32566131035416	0.232	0.008	0	NFATC4	Inf	LyM vs PT
PTP4A1	0	9.29991217208693	0.224	0	0	PTP4A1	Inf	LyM vs PT
HIST1H2BN	0	-1.37758	0.063	0.287	0	HIST1H2BN	Inf	LyM vs PT
RMND1	0	-1.08627	0.084	0.308	0	RMND1	Inf	LyM vs PT
AL035458.2	0	-5.14235	0.003	0.226	0	AL035458.2	Inf	LyM vs PT
PHGR1	0	-3.78469	0.03	0.253	0	PHGR1	Inf	LyM vs PT
TMEM128	0	-2.14913	0.032	0.255	0	TMEM128	Inf	LyM vs PT
FASTKD2	0	-1.30074	0.054	0.276	0	FASTKD2	Inf	LyM vs PT
PPP1CB	0	3.12436976908579	0.341	0.119	0	PPP1CB	Inf	LyM vs PT
IMMP2L	0	-2.6903	0.032	0.254	0	IMMP2L	Inf	LyM vs PT
MTERF3	0	-1.81732	0.041	0.263	0	MTERF3	Inf	LyM vs PT
CDK7	0	-1.11207	0.073	0.295	0	CDK7	Inf	LyM vs PT
FBXO11	0	-1.21781	0.065	0.287	0	FBXO11	Inf	LyM vs PT
TMEM107	0	-1.4633	0.062	0.284	0	TMEM107	Inf	LyM vs PT
LINC00205	0	-1.77603	0.043	0.264	0	LINC00205	Inf	LyM vs PT
LRRC26	0	4.23601804021532	0.279	0.058	0	LRRC26	Inf	LyM vs PT
BLOC1S6	0	12.5827447571296	0.221	0	0	BLOC1S6	Inf	LyM vs PT
FAR1	0	-2.27721	0.032	0.253	0	FAR1	Inf	LyM vs PT
NEFH	0	-7.44105	0.001	0.222	0	NEFH	Inf	LyM vs PT
SOCS7	0	-2.08804	0.032	0.253	0	SOCS7	Inf	LyM vs PT
TMEM216	0	-2.48276	0.022	0.243	0	TMEM216	Inf	LyM vs PT
UBA6-AS1	0	-2.03896	0.037	0.258	0	UBA6-AS1	Inf	LyM vs PT
BOLA1	0	-0.97139	0.079	0.3	0	BOLA1	Inf	LyM vs PT
GNL3L	0	-1.18849	0.064	0.285	0	GNL3L	Inf	LyM vs PT
PIGF	0	-1.1628	0.073	0.294	0	PIGF	Inf	LyM vs PT
DAB1	0	-6.56687	0.001	0.221	0	DAB1	Inf	LyM vs PT
TFB2M	0	-2.73846	0.017	0.237	0	TFB2M	Inf	LyM vs PT
THEM6	0	-1.30913	0.064	0.284	0	THEM6	Inf	LyM vs PT
ACACA	0	-1.74295	0.052	0.271	0	ACACA	Inf	LyM vs PT
HIPK3	0	-1.48546	0.051	0.27	0	HIPK3	Inf	LyM vs PT
CA2	0	-3.05099	0.025	0.244	0	CA2	Inf	LyM vs PT
DUSP2	0	-3.59053	0.019	0.238	0	DUSP2	Inf	LyM vs PT
KAT2A	0	-2.28365	0.027	0.246	0	KAT2A	Inf	LyM vs PT
RPRD1B	0	-2.03466	0.032	0.251	0	RPRD1B	Inf	LyM vs PT
ZMIZ2	0	-1.96134	0.029	0.248	0	ZMIZ2	Inf	LyM vs PT
ZNF138	0	-1.16484	0.068	0.287	0	ZNF138	Inf	LyM vs PT
RPL10A	0	-0.587558	0.699	0.917	0	RPL10A	Inf	LyM vs PT
ASXL1	0	-1.73358	0.051	0.269	0	ASXL1	Inf	LyM vs PT
ATP6V0A1	0	-1.44164	0.06	0.278	0	ATP6V0A1	Inf	LyM vs PT
CTDSP2	0	-1.16722	0.053	0.271	0	CTDSP2	Inf	LyM vs PT
KANSL1	0	-1.10512	0.058	0.276	0	KANSL1	Inf	LyM vs PT
PHYH	0	-1.37569	0.055	0.273	0	PHYH	Inf	LyM vs PT
SLC35B3	0	-1.24409	0.056	0.274	0	SLC35B3	Inf	LyM vs PT
IDS	0	12.7938826750464	0.218	0	0	IDS	Inf	LyM vs PT
PTGER3	0	-4.01336	0.013	0.231	0	PTGER3	Inf	LyM vs PT
SAMD11	0	4.97153652694074	0.243	0.025	0	SAMD11	Inf	LyM vs PT
ZNF160	0	-1.55762	0.04	0.258	0	ZNF160	Inf	LyM vs PT
FCMR	0	-1.07485	0.075	0.293	0	FCMR	Inf	LyM vs PT
UEVLD	0	-1.19044	0.064	0.282	0	UEVLD	Inf	LyM vs PT
ENPP5	0	-1.51279	0.063	0.28	0	ENPP5	Inf	LyM vs PT
MPP7	0	-1.69144	0.045	0.262	0	MPP7	Inf	LyM vs PT
RBM4B	0	-1.62344	0.045	0.262	0	RBM4B	Inf	LyM vs PT
RPS6KC1	0	-1.87968	0.034	0.251	0	RPS6KC1	Inf	LyM vs PT
ALAD	0	-0.935096	0.071	0.288	0	ALAD	Inf	LyM vs PT
DUSP3	0	-1.01919	0.07	0.287	0	DUSP3	Inf	LyM vs PT
DYNC1I2	0	2.33580959719134	0.735	0.518	0	DYNC1I2	Inf	LyM vs PT
IFITM2	0	1.89668306882725	0.603	0.386	0	IFITM2	Inf	LyM vs PT
RRN3	0	-1.01846	0.071	0.288	0	RRN3	Inf	LyM vs PT
SGK3	0	-1.24302	0.072	0.289	0	SGK3	Inf	LyM vs PT
TANC2	0	-1.20652	0.069	0.286	0	TANC2	Inf	LyM vs PT
ZNF32	0	-1.06341	0.071	0.288	0	ZNF32	Inf	LyM vs PT
NSDHL	0	-1.45989	0.045	0.261	0	NSDHL	Inf	LyM vs PT
RPGRIP1L	0	-1.39671	0.064	0.28	0	RPGRIP1L	Inf	LyM vs PT
SNHG19	0	-1.63664	0.051	0.267	0	SNHG19	Inf	LyM vs PT
FOXK2	0	-2.35397	0.025	0.241	0	FOXK2	Inf	LyM vs PT
GDAP1	0	-2.59456	0.038	0.254	0	GDAP1	Inf	LyM vs PT
HOXB7	0	-4.93924	0.004	0.22	0	HOXB7	Inf	LyM vs PT
MMGT1	0	-1.69822	0.04	0.256	0	MMGT1	Inf	LyM vs PT
PIGN	0	-2.05313	0.029	0.245	0	PIGN	Inf	LyM vs PT
SAP30	0	-2.66954	0.022	0.238	0	SAP30	Inf	LyM vs PT
ZBTB33	0	-2.16785	0.025	0.241	0	ZBTB33	Inf	LyM vs PT
ARF5	0	-1.32462	0.055	0.27	0	ARF5	Inf	LyM vs PT
GGA2	0	-1.49958	0.044	0.259	0	GGA2	Inf	LyM vs PT
HIST1H1B	0	-3.34457	0.019	0.234	0	HIST1H1B	Inf	LyM vs PT
LRRC23	0	-3.11135	0.017	0.232	0	LRRC23	Inf	LyM vs PT
DOCK7	0	-1.95096	0.035	0.25	0	DOCK7	Inf	LyM vs PT
MAPK14	0	-1.62709	0.042	0.257	0	MAPK14	Inf	LyM vs PT
PGLYRP2	0	-5.15676	0.004	0.219	0	PGLYRP2	Inf	LyM vs PT
CEPT1	0	-1.12802	0.068	0.283	0	CEPT1	Inf	LyM vs PT
MRPL10	0	-1.14479	0.074	0.289	0	MRPL10	Inf	LyM vs PT
SORT1	0	-1.08897	0.068	0.283	0	SORT1	Inf	LyM vs PT
THAP4	0	-1.09945	0.067	0.282	0	THAP4	Inf	LyM vs PT
BATF	0	-1.96794	0.047	0.261	0	BATF	Inf	LyM vs PT
CLK2	0	-1.23157	0.063	0.277	0	CLK2	Inf	LyM vs PT
CSKMT	0	-1.36961	0.064	0.278	0	CSKMT	Inf	LyM vs PT
FASTK	0	-1.15273	0.065	0.279	0	FASTK	Inf	LyM vs PT
NUPL2	0	-1.35566	0.065	0.279	0	NUPL2	Inf	LyM vs PT
GNA12	0	-2.21474	0.027	0.241	0	GNA12	Inf	LyM vs PT
IQCK	0	-1.18852	0.068	0.282	0	IQCK	Inf	LyM vs PT
APPL2	0	-1.13613	0.067	0.28	0	APPL2	Inf	LyM vs PT
C5orf22	0	-2.68225	0.018	0.231	0	C5orf22	Inf	LyM vs PT
GALNT2	0	-1.61724	0.046	0.259	0	GALNT2	Inf	LyM vs PT
TBCK	0	-1.54397	0.06	0.273	0	TBCK	Inf	LyM vs PT
VPS37C	0	-1.13587	0.065	0.278	0	VPS37C	Inf	LyM vs PT
ZNF28	0	-1.50724	0.045	0.258	0	ZNF28	Inf	LyM vs PT
HIST1H2BJ	0	-2.14811	0.038	0.251	0	HIST1H2BJ	Inf	LyM vs PT
KLHL11	0	-4.69366	0.005	0.218	0	KLHL11	Inf	LyM vs PT
MEST	0	-1.76777	0.029	0.242	0	MEST	Inf	LyM vs PT
RPL18A	0	3.04874018007034	0.863	0.65	0	RPL18A	Inf	LyM vs PT
ARRB1	0	-1.79244	0.047	0.259	0	ARRB1	Inf	LyM vs PT
ASCL2	0	-1.41819	0.044	0.256	0	ASCL2	Inf	LyM vs PT
NUP153	0	-1.51765	0.043	0.255	0	NUP153	Inf	LyM vs PT
SSH3	0	-1.20058	0.052	0.264	0	SSH3	Inf	LyM vs PT
TTC9	0	-1.49268	0.047	0.259	0	TTC9	Inf	LyM vs PT
VCPIP1	0	-1.07009	0.069	0.281	0	VCPIP1	Inf	LyM vs PT
DHRS13	0	-1.91754	0.036	0.248	0	DHRS13	Inf	LyM vs PT
GLE1	0	-2.19057	0.025	0.237	0	GLE1	Inf	LyM vs PT
KDM1B	0	-2.16412	0.027	0.239	0	KDM1B	Inf	LyM vs PT
SLC35E2B	0	-1.43065	0.039	0.251	0	SLC35E2B	Inf	LyM vs PT
C2orf76	0	-1.04665	0.073	0.285	0	C2orf76	Inf	LyM vs PT
RPIA	0	-0.970664	0.071	0.283	0	RPIA	Inf	LyM vs PT
HMGCR	0	-1.06841	0.06	0.271	0	HMGCR	Inf	LyM vs PT
IPO5	0	-1.28427	0.05	0.261	0	IPO5	Inf	LyM vs PT
LZTFL1	0	-1.3852	0.051	0.262	0	LZTFL1	Inf	LyM vs PT
METAP1	0	-1.15678	0.053	0.264	0	METAP1	Inf	LyM vs PT
NECAP2	0	-1.26343	0.054	0.265	0	NECAP2	Inf	LyM vs PT
OGFOD1	0	-1.00954	0.066	0.277	0	OGFOD1	Inf	LyM vs PT
CCZ1B	0	-2.12813	0.035	0.246	0	CCZ1B	Inf	LyM vs PT
GCNT3	0	8.34793922381141	0.215	0.004	0	GCNT3	Inf	LyM vs PT
MT1G	0	-9.52713	0	0.211	0	MT1G	Inf	LyM vs PT
RASSF3	0	-2.40185	0.029	0.24	0	RASSF3	Inf	LyM vs PT
ARMC9	0	-1.39199	0.05	0.26	0	ARMC9	Inf	LyM vs PT
COL18A1	0	-2.81736	0.019	0.229	0	COL18A1	Inf	LyM vs PT
MEX3C	0	-2.41367	0.021	0.231	0	MEX3C	Inf	LyM vs PT
PHLDA1	0	-1.74676	0.054	0.264	0	PHLDA1	Inf	LyM vs PT
PIP4K2C	0	-1.26253	0.051	0.261	0	PIP4K2C	Inf	LyM vs PT
RAF1	0	-2.1756	0.023	0.233	0	RAF1	Inf	LyM vs PT
TMEM185B	0	-1.20276	0.062	0.272	0	TMEM185B	Inf	LyM vs PT
USB1	0	-1.30448	0.05	0.26	0	USB1	Inf	LyM vs PT
MANEAL	0	-1.79053	0.035	0.245	0	MANEAL	Inf	LyM vs PT
GCDH	0	-1.46414	0.049	0.258	0	GCDH	Inf	LyM vs PT
NUP93	0	-1.31402	0.048	0.257	0	NUP93	Inf	LyM vs PT
SERTAD3	0	-1.26927	0.068	0.277	0	SERTAD3	Inf	LyM vs PT
BCAP29	0	9.78581579440147	0.21	0.001	0	BCAP29	Inf	LyM vs PT
TUBA3D	0	-6.72722	0.001	0.21	0	TUBA3D	Inf	LyM vs PT
YRDC	0	-1.79219	0.035	0.244	0	YRDC	Inf	LyM vs PT
APEX2	0	-1.12986	0.062	0.27	0	APEX2	Inf	LyM vs PT
ARL4D	0	-1.7087	0.059	0.266	0	ARL4D	Inf	LyM vs PT
ECD	0	-1.37224	0.059	0.266	0	ECD	Inf	LyM vs PT
GLA	0	-1.61298	0.046	0.253	0	GLA	Inf	LyM vs PT
KLHDC9	0	-1.39726	0.052	0.259	0	KLHDC9	Inf	LyM vs PT
MED15	0	-1.28799	0.051	0.258	0	MED15	Inf	LyM vs PT
PELI1	0	-2.27928	0.02	0.227	0	PELI1	Inf	LyM vs PT
PXDNL	0	-3.71589	0.024	0.231	0	PXDNL	Inf	LyM vs PT
SSFA2	0	-1.12318	0.067	0.274	0	SSFA2	Inf	LyM vs PT
SSH2	0	-1.7147	0.047	0.254	0	SSH2	Inf	LyM vs PT
TIFA	0	-1.23493	0.059	0.266	0	TIFA	Inf	LyM vs PT
SLC46A1	0	-2.14072	0.028	0.235	0	SLC46A1	Inf	LyM vs PT
BAIAP2	0	-1.05039	0.065	0.271	0	BAIAP2	Inf	LyM vs PT
EPS8L1	0	-1.36952	0.049	0.255	0	EPS8L1	Inf	LyM vs PT
NUP214	0	-1.02979	0.061	0.267	0	NUP214	Inf	LyM vs PT
PLEKHH3	0	-1.341	0.048	0.254	0	PLEKHH3	Inf	LyM vs PT
RUFY3	0	-1.09161	0.063	0.269	0	RUFY3	Inf	LyM vs PT
DEDD2	0	-1.9301	0.032	0.238	0	DEDD2	Inf	LyM vs PT
HIST1H2AG	0	-2.16482	0.038	0.244	0	HIST1H2AG	Inf	LyM vs PT
NRARP	0	-5.73725	0.002	0.208	0	NRARP	Inf	LyM vs PT
PAGE5	0	-12.5016	0	0.206	0	PAGE5	Inf	LyM vs PT
TAF9	0	12.5372307506214	0.206	0	0	TAF9	Inf	LyM vs PT
BAMBI	0	-1.36555	0.07	0.275	0	BAMBI	Inf	LyM vs PT
EMSY	0	-1.42103	0.046	0.251	0	EMSY	Inf	LyM vs PT
ERN1	0	-1.3175	0.049	0.254	0	ERN1	Inf	LyM vs PT
GSKIP	0	-1.34294	0.049	0.254	0	GSKIP	Inf	LyM vs PT
POFUT2	0	-2.72442	0.017	0.222	0	POFUT2	Inf	LyM vs PT
TRAFD1	0	-1.5451	0.045	0.25	0	TRAFD1	Inf	LyM vs PT
CXCL8	0	-4.08867	0.005	0.21	0	CXCL8	Inf	LyM vs PT
FMO5	0	-6.43231	0.006	0.211	0	FMO5	Inf	LyM vs PT
RABAC1	0	2.73099672290068	0.422	0.217	0	RABAC1	Inf	LyM vs PT
SLC25A43	0	-1.91979	0.034	0.239	0	SLC25A43	Inf	LyM vs PT
ZBTB7B	0	-1.50367	0.039	0.244	0	ZBTB7B	Inf	LyM vs PT
ELOB	0	-0.568603	0.716	0.92	0	ELOB	Inf	LyM vs PT
CMTR2	0	-2.00703	0.026	0.23	0	CMTR2	Inf	LyM vs PT
MRE11	0	-1.25881	0.055	0.259	0	MRE11	Inf	LyM vs PT
SLC4A2	0	-1.8907	0.03	0.234	0	SLC4A2	Inf	LyM vs PT
ZNF330	0	-1.20596	0.06	0.264	0	ZNF330	Inf	LyM vs PT
BCOR	0	-1.81299	0.031	0.235	0	BCOR	Inf	LyM vs PT
EPOP	0	-5.07988	0.005	0.209	0	EPOP	Inf	LyM vs PT
IGSF1	0	-4.69678	0.004	0.208	0	IGSF1	Inf	LyM vs PT
MEN1	0	-1.72579	0.035	0.239	0	MEN1	Inf	LyM vs PT
RNASET2	0	4.28432189474616	0.241	0.037	0	RNASET2	Inf	LyM vs PT
SLC43A1	0	-6.27636	0.003	0.207	0	SLC43A1	Inf	LyM vs PT
FAM3A	0	-1.32575	0.047	0.25	0	FAM3A	Inf	LyM vs PT
FBXO28	0	-1.28956	0.05	0.253	0	FBXO28	Inf	LyM vs PT
MOB1B	0	-2.54876	0.017	0.22	0	MOB1B	Inf	LyM vs PT
SEC24B	0	-1.43217	0.044	0.247	0	SEC24B	Inf	LyM vs PT
SLC39A1	0	12.5656312837765	0.203	0	0	SLC39A1	Inf	LyM vs PT
DCK	0	-2.1285	0.037	0.24	0	DCK	Inf	LyM vs PT
LYSMD3	0	-1.63782	0.038	0.241	0	LYSMD3	Inf	LyM vs PT
SPIN3	0	-3.89521	0.009	0.212	0	SPIN3	Inf	LyM vs PT
HEBP2	0	2.66408128355715	0.782	0.58	0	HEBP2	Inf	LyM vs PT
ASTN2	0	-2.92866	0.022	0.224	0	ASTN2	Inf	LyM vs PT
HOXC9	0	12.6772085707283	0.202	0	0	HOXC9	Inf	LyM vs PT
NARS2	0	-2.54593	0.022	0.224	0	NARS2	Inf	LyM vs PT
TBC1D20	0	-1.03412	0.059	0.261	0	TBC1D20	Inf	LyM vs PT
XPO5	0	-2.11576	0.02	0.222	0	XPO5	Inf	LyM vs PT
YAP1	0	-2.18569	0.029	0.231	0	YAP1	Inf	LyM vs PT
ITSN2	0	2.53963168415902	0.405	0.204	0	ITSN2	Inf	LyM vs PT
CCDC74A	0	-2.36028	0.028	0.229	0	CCDC74A	Inf	LyM vs PT
CDKN2AIPNL	0	-1.37868	0.047	0.248	0	CDKN2AIPNL	Inf	LyM vs PT
PINK1	0	-1.16377	0.058	0.259	0	PINK1	Inf	LyM vs PT
PSMC1	0	2.97370168857231	0.33	0.129	0	PSMC1	Inf	LyM vs PT
STN1	0	-1.30294	0.062	0.263	0	STN1	Inf	LyM vs PT
TAP1	0	-1.00342	0.06	0.261	0	TAP1	Inf	LyM vs PT
PARM1	0	-3.32355	0.011	0.212	0	PARM1	Inf	LyM vs PT
FRAT2	0	-2.54185	0.016	0.216	0	FRAT2	Inf	LyM vs PT
KYNU	0	3.59666884592917	0.263	0.063	0	KYNU	Inf	LyM vs PT
POMGNT1	0	-1.56427	0.042	0.242	0	POMGNT1	Inf	LyM vs PT
TSC2	0	-1.70541	0.035	0.235	0	TSC2	Inf	LyM vs PT
CHUK	0	-1.91124	0.031	0.23	0	CHUK	Inf	LyM vs PT
LRIG1	0	-0.944681	0.052	0.251	0	LRIG1	Inf	LyM vs PT
MAP1B	0	4.60566469416867	0.259	0.06	0	MAP1B	Inf	LyM vs PT
TRAPPC9	0	-2.61271	0.022	0.221	0	TRAPPC9	Inf	LyM vs PT
TSPAN6	0	-3.12188	0.016	0.215	0	TSPAN6	Inf	LyM vs PT
ZNF598	0	-1.81725	0.028	0.227	0	ZNF598	Inf	LyM vs PT
DRAIC	0	-2.71871	0.039	0.238	0	DRAIC	Inf	LyM vs PT
MFSD2A	0	4.70710832545525	0.24	0.041	0	MFSD2A	Inf	LyM vs PT
RNFT1	0	-1.73125	0.038	0.237	0	RNFT1	Inf	LyM vs PT
LCN2	0	4.87397986753358	0.269	0.071	0	LCN2	Inf	LyM vs PT
NR1D1	0	-1.69498	0.046	0.244	0	NR1D1	Inf	LyM vs PT
RAB40C	0	-2.43721	0.023	0.221	0	RAB40C	Inf	LyM vs PT
SEC24C	0	-1.59909	0.034	0.232	0	SEC24C	Inf	LyM vs PT
SNX8	0	-1.64004	0.041	0.239	0	SNX8	Inf	LyM vs PT
DLAT	0	-1.79485	0.033	0.23	0	DLAT	Inf	LyM vs PT
KIAA2013	0	-0.925228	0.055	0.252	0	KIAA2013	Inf	LyM vs PT
SDHAF3	0	-1.4853	0.048	0.245	0	SDHAF3	Inf	LyM vs PT
IKZF5	0	-1.49545	0.04	0.237	0	IKZF5	Inf	LyM vs PT
DLEU1	0	-2.76007	0.021	0.217	0	DLEU1	Inf	LyM vs PT
NFKBIZ	0	2.1578389642226	0.654	0.458	0	NFKBIZ	Inf	LyM vs PT
PIK3C2G	0	-2.85944	0.027	0.223	0	PIK3C2G	Inf	LyM vs PT
PREP	0	-1.99158	0.029	0.225	0	PREP	Inf	LyM vs PT
SIRT1	0	-1.94092	0.032	0.228	0	SIRT1	Inf	LyM vs PT
TMEM209	0	-1.32	0.051	0.247	0	TMEM209	Inf	LyM vs PT
EXT2	0	-1.51163	0.042	0.238	0	EXT2	Inf	LyM vs PT
RAB11FIP4	0	-1.47426	0.042	0.238	0	RAB11FIP4	Inf	LyM vs PT
RING1	0	-1.59895	0.04	0.236	0	RING1	Inf	LyM vs PT
RPS4X	0	-0.624483	0.741	0.936	0	RPS4X	Inf	LyM vs PT
ASB3	0	-1.58432	0.029	0.224	0	ASB3	Inf	LyM vs PT
GPC4	0	-1.38084	0.055	0.25	0	GPC4	Inf	LyM vs PT
HERC4	0	-1.33596	0.048	0.243	0	HERC4	Inf	LyM vs PT
WRAP73	0	-1.33134	0.046	0.241	0	WRAP73	Inf	LyM vs PT
MAU2	0	-1.41868	0.042	0.237	0	MAU2	Inf	LyM vs PT
TNF	0	-4.322	0.013	0.208	0	TNF	Inf	LyM vs PT
CRABP2	0	-0.97283	0.651	0.846	0	CRABP2	Inf	LyM vs PT
DBNDD1	0	-1.24253	0.044	0.238	0	DBNDD1	Inf	LyM vs PT
HSDL1	0	-1.89576	0.028	0.222	0	HSDL1	Inf	LyM vs PT
IQANK1	0	-1.2225	0.047	0.241	0	IQANK1	Inf	LyM vs PT
LFNG	0	-1.57293	0.038	0.232	0	LFNG	Inf	LyM vs PT
USP38	0	-1.22819	0.051	0.245	0	USP38	Inf	LyM vs PT
POLI	0	-1.6179	0.043	0.236	0	POLI	Inf	LyM vs PT
RFNG	0	-1.70208	0.026	0.219	0	RFNG	Inf	LyM vs PT
SCAP	0	-1.40721	0.041	0.234	0	SCAP	Inf	LyM vs PT
SUGP1	0	-1.95413	0.03	0.223	0	SUGP1	Inf	LyM vs PT
VARS	0	-1.69617	0.032	0.225	0	VARS	Inf	LyM vs PT
BICDL2	0	-1.09692	0.05	0.242	0	BICDL2	Inf	LyM vs PT
ECM1	0	4.53348739797098	0.22	0.028	0	ECM1	Inf	LyM vs PT
KLHL36	0	-1.5533	0.033	0.225	0	KLHL36	Inf	LyM vs PT
NEK4	0	-1.85176	0.029	0.221	0	NEK4	Inf	LyM vs PT
RHOU	0	-2.23245	0.03	0.222	0	RHOU	Inf	LyM vs PT
TGFBR3	0	-2.23775	0.039	0.231	0	TGFBR3	Inf	LyM vs PT
ARPC1B	0	4.01784504657186	0.24	0.049	0	ARPC1B	Inf	LyM vs PT
HEATR3	0	-1.53371	0.04	0.231	0	HEATR3	Inf	LyM vs PT
CDKN2B	0	-2.12997	0.031	0.221	0	CDKN2B	Inf	LyM vs PT
DPAGT1	0	-1.19941	0.049	0.239	0	DPAGT1	Inf	LyM vs PT
FARP2	0	-2.00914	0.027	0.217	0	FARP2	Inf	LyM vs PT
PRUNE1	0	-1.50703	0.037	0.227	0	PRUNE1	Inf	LyM vs PT
ZCCHC3	0	-2.19606	0.02	0.21	0	ZCCHC3	Inf	LyM vs PT
OSGIN1	0	-3.21644	0.014	0.204	0	OSGIN1	Inf	LyM vs PT
BCAR3	0	-2.98155	0.018	0.207	0	BCAR3	Inf	LyM vs PT
BCL9L	0	-1.24132	0.045	0.234	0	BCL9L	Inf	LyM vs PT
C9orf3	0	-1.60381	0.052	0.241	0	C9orf3	Inf	LyM vs PT
CCNG1	0	-1.42093	0.041	0.23	0	CCNG1	Inf	LyM vs PT
CXorf40B	0	-1.39218	0.043	0.232	0	CXorf40B	Inf	LyM vs PT
FAM102B	0	-2.82668	0.015	0.204	0	FAM102B	Inf	LyM vs PT
LZTS2	0	-1.68299	0.029	0.218	0	LZTS2	Inf	LyM vs PT
TEAD1	0	-1.48389	0.048	0.237	0	TEAD1	Inf	LyM vs PT
TRMT1	0	-2.00861	0.028	0.217	0	TRMT1	Inf	LyM vs PT
ZNF14	0	-3.25917	0.013	0.202	0	ZNF14	Inf	LyM vs PT
COG4	0	-1.7524	0.029	0.217	0	COG4	Inf	LyM vs PT
RDH11	0	5.06322670046131	0.209	0.021	0	RDH11	Inf	LyM vs PT
COG5	0	-1.89684	0.031	0.218	0	COG5	Inf	LyM vs PT
EGR3	0	-2.69702	0.016	0.203	0	EGR3	Inf	LyM vs PT
EIF2AK3	0	-2.23599	0.02	0.207	0	EIF2AK3	Inf	LyM vs PT
HTT	0	-2.0669	0.028	0.215	0	HTT	Inf	LyM vs PT
HECTD2	0	-1.73274	0.044	0.23	0	HECTD2	Inf	LyM vs PT
PCGF3	0	-1.34109	0.044	0.23	0	PCGF3	Inf	LyM vs PT
PPP1R16A	0	-1.49431	0.036	0.222	0	PPP1R16A	Inf	LyM vs PT
SH3BP5	0	-1.48602	0.041	0.226	0	SH3BP5	Inf	LyM vs PT
GAS8	0	-1.6574	0.032	0.216	0	GAS8	Inf	LyM vs PT
PABPC1L	0	-2.35905	0.021	0.205	0	PABPC1L	Inf	LyM vs PT
RPA1	0	-1.3608	0.04	0.224	0	RPA1	Inf	LyM vs PT
SUSD4	0	-1.55588	0.038	0.222	0	SUSD4	Inf	LyM vs PT
BICRAL	0	-2.43353	0.021	0.204	0	BICRAL	Inf	LyM vs PT
CAPN8	0	-1.49096	0.036	0.219	0	CAPN8	Inf	LyM vs PT
POLR3C	0	-1.58144	0.035	0.218	0	POLR3C	Inf	LyM vs PT
PRPS1	0	-1.52104	0.039	0.222	0	PRPS1	Inf	LyM vs PT
AC015912.3	0	-2.00101	0.033	0.215	0	AC015912.3	Inf	LyM vs PT
CREBL2	0	-1.77128	0.027	0.209	0	CREBL2	Inf	LyM vs PT
MPHOSPH6	0	3.03567693279287	0.517	0.335	0	MPHOSPH6	Inf	LyM vs PT
NEK8	0	-1.77626	0.03	0.212	0	NEK8	Inf	LyM vs PT
S100PBP	0	-1.8859	0.029	0.211	0	S100PBP	Inf	LyM vs PT
TOR1B	0	-1.66018	0.032	0.214	0	TOR1B	Inf	LyM vs PT
PDE7A	0	-2.3431	0.019	0.2	0	PDE7A	Inf	LyM vs PT
TNS3	0	-2.92244	0.021	0.202	0	TNS3	Inf	LyM vs PT
BTRC	0	-1.87408	0.033	0.214	0	BTRC	Inf	LyM vs PT
EPS15L1	0	-1.52138	0.039	0.22	0	EPS15L1	Inf	LyM vs PT
FTO	0	-2.13497	0.029	0.21	0	FTO	Inf	LyM vs PT
ZMYND19	0	-1.66047	0.029	0.21	0	ZMYND19	Inf	LyM vs PT
LINC01006	0	-1.60018	0.042	0.222	0	LINC01006	Inf	LyM vs PT
SELENOI	0	-1.39804	0.039	0.219	0	SELENOI	Inf	LyM vs PT
MYO18A	0	-2.10927	0.024	0.203	0	MYO18A	Inf	LyM vs PT
FAM8A1	0	-1.61568	0.039	0.218	0	FAM8A1	Inf	LyM vs PT
ZNF623	0	-2.10929	0.023	0.201	0	ZNF623	Inf	LyM vs PT
CDK10	0	-1.39267	0.035	0.212	0	CDK10	Inf	LyM vs PT
RAI14	0	-1.81903	0.034	0.211	0	RAI14	Inf	LyM vs PT
EXT1	0	-2.52049	0.024	0.2	0	EXT1	Inf	LyM vs PT
NEURL1	0	-2.40629	0.026	0.202	0	NEURL1	Inf	LyM vs PT
IQSEC2	0	-1.7128	0.032	0.208	0	IQSEC2	Inf	LyM vs PT
KMT2E-AS1	0	-1.65055	0.039	0.215	0	KMT2E-AS1	Inf	LyM vs PT
CDK14	0	-2.59246	0.027	0.202	0	CDK14	Inf	LyM vs PT
XPR1	0	-1.96792	0.027	0.202	0	XPR1	Inf	LyM vs PT
TMEM11	0	3.08663049957191	0.419	0.244	0	TMEM11	Inf	LyM vs PT
ITPK1	0	-1.8611	0.026	0.2	0	ITPK1	Inf	LyM vs PT
TAZ	0	-1.56954	0.033	0.207	0	TAZ	Inf	LyM vs PT
STIM1	0	-1.91095	0.03	0.203	0	STIM1	Inf	LyM vs PT
LCLAT1	0	-1.60671	0.035	0.208	0	LCLAT1	Inf	LyM vs PT
TIMP2	0	-1.43753	0.035	0.208	0	TIMP2	Inf	LyM vs PT
SLC38A6	0	-1.67379	0.034	0.206	0	SLC38A6	Inf	LyM vs PT
MKKS	0	-1.7113	0.032	0.203	0	MKKS	Inf	LyM vs PT
RTKN2	0	-2.22911	0.033	0.202	0	RTKN2	Inf	LyM vs PT
USP8	0	2.10069811938731	0.492	0.323	0	USP8	Inf	LyM vs PT
FTL	0	-0.882166	0.777	0.944	0	FTL	Inf	LyM vs PT
RPL5	0	-0.823479	0.793	0.958	0	RPL5	Inf	LyM vs PT
S100A6	0	3.73489346989509	0.608	0.446	0	S100A6	Inf	LyM vs PT
RPL10	0	-0.795643	0.803	0.964	0	RPL10	Inf	LyM vs PT
EIF5B	0	2.08777635260522	0.76	0.6	0	EIF5B	Inf	LyM vs PT
ATP1B1	0	1.82379999962283	0.581	0.422	0	ATP1B1	Inf	LyM vs PT
DDX5	0	-0.67723	0.787	0.942	0	DDX5	Inf	LyM vs PT
FXR1	0	2.28557110054508	0.698	0.543	0	FXR1	Inf	LyM vs PT
NUCB2	0	1.59205063078601	0.816	0.663	0	NUCB2	Inf	LyM vs PT
RPS20	0	-0.710017	0.808	0.958	0	RPS20	Inf	LyM vs PT
CASC3	0	2.55703992103869	0.523	0.374	0	CASC3	Inf	LyM vs PT
RPS28	0	2.49388023425023	0.896	0.747	0	RPS28	Inf	LyM vs PT
MSL1	0	2.66238747313544	0.599	0.456	0	MSL1	Inf	LyM vs PT
MESD	0	1.91918969916189	0.517	0.384	0	MESD	Inf	LyM vs PT
PPIA	0	-1.54889	0.838	0.97	0	PPIA	Inf	LyM vs PT
RTF1	0	1.87270854187264	0.556	0.426	0	RTF1	Inf	LyM vs PT
SEC62	0	2.16332892157108	0.862	0.732	0	SEC62	Inf	LyM vs PT
JUN	0	-1.44727	0.833	0.962	0	JUN	Inf	LyM vs PT
RBM25	0	1.87862336969191	0.604	0.477	0	RBM25	Inf	LyM vs PT
EIF3A	0	1.85095126088279	0.797	0.674	0	EIF3A	Inf	LyM vs PT
KIF5B	0	1.6361130980585	0.787	0.667	0	KIF5B	Inf	LyM vs PT
RPL41	0	1.96263219803786	0.651	0.531	0	RPL41	Inf	LyM vs PT
AP2B1	0	1.82199689133264	0.551	0.433	0	AP2B1	Inf	LyM vs PT
RPL19	0	-2.44981	0.878	0.99	0	RPL19	Inf	LyM vs PT
EIF1	0	-1.98397	0.88	0.988	0	EIF1	Inf	LyM vs PT
LRRFIP1	0	1.79149846457986	0.797	0.691	0	LRRFIP1	Inf	LyM vs PT
MT2A	0	2.01438610992428	0.84	0.734	0	MT2A	Inf	LyM vs PT
CFL1	0	-1.08595	0.848	0.953	0	CFL1	Inf	LyM vs PT
RPL23A	0	-0.7483	0.87	0.975	0	RPL23A	Inf	LyM vs PT
SMARCA5	0	1.67659707823077	0.691	0.598	0	SMARCA5	Inf	LyM vs PT
PRPF40A	0	1.72143694114413	0.801	0.711	0	PRPF40A	Inf	LyM vs PT
RPL37	0	-0.454051	0.883	0.973	0	RPL37	Inf	LyM vs PT
TPR	0	1.72143847978833	0.64	0.553	0	TPR	Inf	LyM vs PT
NUCKS1	0	2.07979756191039	0.924	0.838	0	NUCKS1	Inf	LyM vs PT
AKAP9	0	1.55472894397252	0.742	0.658	0	AKAP9	Inf	LyM vs PT
RPL6	0	1.9344566127553	0.891	0.809	0	RPL6	Inf	LyM vs PT
MORF4L1	0	1.77577967014624	0.739	0.658	0	MORF4L1	Inf	LyM vs PT
MT-ATP8	0	1.77353346991829	0.96	0.888	0	MT-ATP8	Inf	LyM vs PT
EIF2S2	0	1.78562	0.765	0.697	0	EIF2S2	Inf	LyM vs PT
RPS29	0	-0.768245	0.92	0.988	0	RPS29	Inf	LyM vs PT
RPS3A	0	2.08036206806711	0.874	0.809	0	RPS3A	Inf	LyM vs PT
HACD3	0	1.43447122758871	0.677	0.619	0	HACD3	Inf	LyM vs PT
PDIA3	0	1.84692424067434	0.932	0.878	0	PDIA3	Inf	LyM vs PT
SON	0	0.916168319788727	0.788	0.842	0	SON	Inf	LyM vs PT
RPL23	0	-1.30239	0.934	0.987	0	RPL23	Inf	LyM vs PT
RPL37A	0	-0.302087	0.932	0.984	0	RPL37A	Inf	LyM vs PT
KRT19	0	-2.23731	0.94	0.986	0	KRT19	Inf	LyM vs PT
HMGB1	0	1.22993850029501	0.851	0.896	0	HMGB1	Inf	LyM vs PT
RPL13A	0	1.92984511888978	0.962	0.917	0	RPL13A	Inf	LyM vs PT
MT-ND3	0	1.34451200907226	0.984	0.94	0	MT-ND3	Inf	LyM vs PT
RPL39	0	0.762949992162927	0.882	0.926	0	RPL39	Inf	LyM vs PT
ACTB	0	-1.07195	0.942	0.985	0	ACTB	Inf	LyM vs PT
HSP90AA1	0	1.69806985036396	0.979	0.937	0	HSP90AA1	Inf	LyM vs PT
HSPB1	0	-0.647008	0.937	0.979	0	HSPB1	Inf	LyM vs PT
RPL24	0	0.746950228812223	0.86	0.899	0	RPL24	Inf	LyM vs PT
RPL13	0	-0.493234	0.945	0.981	0	RPL13	Inf	LyM vs PT
SRP72	0	1.3929640340771	0.654	0.619	0	SRP72	Inf	LyM vs PT
SUCLG1	0	1.62654870854559	0.654	0.623	0	SUCLG1	Inf	LyM vs PT
SELENOW	0	1.21864742439884	0.716	0.685	0	SELENOW	Inf	LyM vs PT
PABPC1	0	1.71209551006336	0.994	0.964	0	PABPC1	Inf	LyM vs PT
MTDH	0	1.11809043169045	0.739	0.768	0	MTDH	Inf	LyM vs PT
UBXN4	0	1.0659571029388	0.728	0.757	0	UBXN4	Inf	LyM vs PT
ATP6V1G1	0	0.990365152884679	0.865	0.891	0	ATP6V1G1	Inf	LyM vs PT
KTN1	0	0.839100556097775	0.88	0.906	0	KTN1	Inf	LyM vs PT
CAP1	0	1.97207113973908	0.673	0.699	0	CAP1	Inf	LyM vs PT
CBX3	0	1.33312303845832	0.844	0.823	0	CBX3	Inf	LyM vs PT
TMBIM6	0	0.89179905480145	0.919	0.898	0	TMBIM6	Inf	LyM vs PT
RPL36	0	0.98736857347727	0.899	0.919	0	RPL36	Inf	LyM vs PT
HSP90AB1	0	0.510535619615387	0.992	0.977	0	HSP90AB1	Inf	LyM vs PT
MT-ND4	0	0.790084982186996	0.997	0.982	0	MT-ND4	Inf	LyM vs PT
RPL31	0	0.759131557840049	0.961	0.975	0	RPL31	Inf	LyM vs PT
MGP	0	-1.7558	0.806	0.82	0	MGP	Inf	LyM vs PT
CDC42	0	1.07066813712701	0.795	0.808	0	CDC42	Inf	LyM vs PT
PSMA7	0	1.47381911394424	0.915	0.927	0	PSMA7	Inf	LyM vs PT
RPL3	0	1.22528025450536	0.873	0.861	0	RPL3	Inf	LyM vs PT
PPDPF	0	1.9423920013403	0.926	0.915	0	PPDPF	Inf	LyM vs PT
RPS15	0	1.57377903721521	0.934	0.924	0	RPS15	Inf	LyM vs PT
RPS27	0	1.48657137475583	0.957	0.967	0	RPS27	Inf	LyM vs PT
PTMA	0	1.05192131417725	0.996	0.99	0	PTMA	Inf	LyM vs PT
ARPC2	0	1.28306863166693	0.809	0.815	0	ARPC2	Inf	LyM vs PT
RPL27A	0	0.756285772115451	0.943	0.948	0	RPL27A	Inf	LyM vs PT
EPCAM	0	1.19428381790839	0.852	0.848	0	EPCAM	Inf	LyM vs PT
SERF2	0	0.749709217507902	0.956	0.952	0	SERF2	Inf	LyM vs PT
MALAT1	0	1.47836235847296	1	0.999	0	MALAT1	Inf	LyM vs PT
YWHAB	0	1.01924157363401	0.862	0.861	0	YWHAB	Inf	LyM vs PT
PRRC2A	9.88131291682493e-324	-0.719188	0.088	0.317	1.88980109534277e-319	PRRC2A	318.723583903626	LyM vs PT
UBE2M	9.88131291682493e-324	-0.869322	0.088	0.316	1.88980109534277e-319	UBE2M	318.723583903626	LyM vs PT
ARIH2	2.96439387504748e-323	-0.683392	0.11	0.356	5.6694032860283e-319	ARIH2	318.246462648907	LyM vs PT
MRRF	2.96439387504748e-323	-0.855166	0.076	0.293	5.6694032860283e-319	MRRF	318.246462648907	LyM vs PT
MRPL14	3.95252516672997e-323	-0.585572	0.34	0.704	7.55920438137107e-319	MRPL14	318.121523912298	LyM vs PT
DPF2	5.92878775009496e-323	-1.29918	0.041	0.221	1.13388065720566e-318	DPF2	317.945432653243	LyM vs PT
CHORDC1	7.90505033345994e-323	-0.737407	0.185	0.477	1.51184087627421e-318	CHORDC1	317.820493916634	LyM vs PT
AC244090.1	9.88131291682493e-323	-1.14617	0.052	0.243	1.88980109534277e-318	AC244090.1	317.723583903626	LyM vs PT
PSMF1	1.08694442085074e-322	-0.536951	0.192	0.501	2.07878120487704e-318	PSMF1	317.682191218468	LyM vs PT
OXLD1	1.38338380835549e-322	-0.717288	0.147	0.416	2.64572153347988e-318	OXLD1	317.577455867948	LyM vs PT
GPD2	1.67982319586024e-322	-0.663748	0.149	0.424	3.21266186208271e-318	GPD2	317.493134982248	LyM vs PT
TAF7	1.67982319586024e-322	1.97923739701934	0.478	0.303	3.21266186208271e-318	TAF7	317.493134982248	LyM vs PT
TMEM9	1.77863632502849e-322	-0.585888	0.209	0.525	3.40164197161698e-318	TMEM9	317.468311398523	LyM vs PT
MED28	2.76676761671098e-322	-1.02981	0.074	0.284	5.29144306695975e-318	MED28	317.276425872284	LyM vs PT
CD58	3.35964639172048e-322	-1.18451	0.067	0.271	6.42532372416541e-318	CD58	317.192104986584	LyM vs PT
ANGEL2	7.8062372042917e-322	-0.80098	0.086	0.31	1.49294286532079e-317	ANGEL2	316.825956812336	LyM vs PT
OSBPL1A	1.26480805335359e-321	-0.943507	0.082	0.301	2.41894540203874e-317	OSBPL1A	316.616373933978	LyM vs PT
DCAF10	1.78851763794531e-321	-1.01868	0.095	0.322	3.42053998257041e-317	DCAF10	316.465905328757	LyM vs PT
JARID2	2.11460096420054e-321	-0.950775	0.079	0.294	4.04417434403352e-317	JARID2	316.393170130277	LyM vs PT
MRPL17	2.34187116128751e-321	-0.652744	0.176	0.467	4.47882859596236e-317	MRPL17	316.348835557616	LyM vs PT
CETN2	2.57902267129131e-321	-0.631668	0.376	0.727	4.93238085884462e-317	CETN2	316.306943396288	LyM vs PT
IFRD2	2.8952246846297e-321	-1.01329	0.067	0.272	5.53711720935431e-317	IFRD2	316.256716283272	LyM vs PT
MLST8	3.27071457546905e-321	-0.952449	0.099	0.331	6.25524162558456e-317	MLST8	316.20375590985	LyM vs PT
AC010642.2	4.36754030923662e-321	-0.732525	0.128	0.385	8.35292084141503e-317	AC010642.2	316.078161634277	LyM vs PT
TMEM14A	7.99398214971137e-321	-0.650698	0.299	0.637	1.5288490861323e-316	TMEM14A	315.815635382014	LyM vs PT
NDUFAF3	1.55334239052488e-320	-0.527503	0.306	0.663	2.97076732187883e-316	NDUFAF3	315.527131361923	LyM vs PT
GAPVD1	1.69760955911052e-320	-0.695595	0.113	0.359	3.24667828179888e-316	GAPVD1	315.488560744131	LyM vs PT
WDR3	3.74699385806001e-320	-0.907025	0.093	0.321	7.16612575353978e-316	WDR3	315.14471557496	LyM vs PT
POP4	6.27759809605888e-320	-0.735858	0.126	0.382	1.20059063587126e-315	POP4	314.920605048291	LyM vs PT
KLHL12	1.03753785626662e-319	-1.32471	0.041	0.219	1.98429115010991e-315	KLHL12	314.702394604556	LyM vs PT
ITGAV	1.87023609576745e-319	-1.49544	0.039	0.212	3.57682653315526e-315	ITGAV	314.446502121501	LyM vs PT
DHX40	8.62599092387149e-319	-0.740757	0.127	0.381	1.64972076419042e-314	DHX40	313.782589559322	LyM vs PT
RNF40	1.57975513995155e-318	-1.01041	0.047	0.232	3.02128170515734e-314	RNF40	313.519808779099	LyM vs PT
ATAD2	1.6232427980985e-318	-1.70584	0.188	0.425	3.10445185136338e-314	ATAD2	313.508015071476	LyM vs PT
MEA1	1.74576119695421e-318	-0.556879	0.256	0.592	3.33876828917493e-314	MEA1	313.476413719977	LyM vs PT
SPOP	2.60563304697632e-318	-0.624481	0.155	0.43	4.98327320234221e-314	SPOP	313.30248530247	LyM vs PT
CTNNB1	3.23793826052394e-318	-0.729844	0.16	0.44	6.19255692325204e-314	CTNNB1	313.208	LyM vs PT
SPSB3	8.85546465373892e-318	-0.875293	0.112	0.353	1.69360761502757e-313	SPSB3	312.771187202251	LyM vs PT
TRIM26	1.39245188921926e-317	-1.26643	0.056	0.248	2.66306423813184e-313	TRIM26	312.574618357433	LyM vs PT
SPTBN1	1.96617079848303e-317	-0.529522	0.167	0.453	3.7603016520988e-313	SPTBN1	312.424777314491	LyM vs PT
AKT2	2.82674718611611e-317	-1.3334	0.046	0.227	5.40615399344706e-313	AKT2	312.267111587651	LyM vs PT
FBXO18	3.31227438946593e-317	-1.06015	0.044	0.224	6.33472476985358e-313	FBXO18	312.19827224953	LyM vs PT
FAHD1	4.41682829806574e-317	-0.589126	0.193	0.495	8.44718412005073e-313	FAHD1	312.073288039563	LyM vs PT
SPATC1L	4.88076878521746e-317	-1.3225	0.046	0.228	9.3344703017284e-313	SPATC1L	312.029910321696	LyM vs PT
BLOC1S4	7.51219601143186e-317	-0.980711	0.077	0.289	1.43670748718634e-312	BLOC1S4	311.842631644971	LyM vs PT
FAM168B	1.11761967223035e-316	-0.995158	0.074	0.283	2.13744762314054e-312	FAM168B	311.670104518593	LyM vs PT
SERPINB6	1.40192144782684e-316	-0.695462	0.155	0.43	2.68117476896883e-312	SERPINB6	311.571674876161	LyM vs PT
ZDHHC20	1.50405351237759e-316	-0.813904	0.076	0.289	2.87650234242215e-312	ZDHHC20	311.541135267979	LyM vs PT
NSRP1	1.82683588723982e-316	1.99656137349156	0.515	0.381	3.49382363434616e-312	NSRP1	311.456699021667	LyM vs PT
POGZ	3.66609890885636e-316	-0.54514	0.105	0.345	7.01141416318779e-312	POGZ	311.15419437842	LyM vs PT
CANX	4.6089585701579e-316	-0.576459	0.637	0.889	8.81463326542699e-312	CANX	311.054795751897	LyM vs PT
GBF1	6.77930861726449e-316	-1.08473	0.069	0.274	1.29654277305183e-311	GBF1	310.887213151248	LyM vs PT
NFAT5	1.21905777217495e-315	-1.17913	0.048	0.232	2.33144798928459e-311	NFAT5	310.632374268487	LyM vs PT
CYB5R1	1.33654265987477e-315	-0.780361	0.123	0.372	2.5561378370105e-311	CYB5R1	310.592415731015	LyM vs PT
SNHG12	1.37891633832873e-315	-1.64376	0.045	0.222	2.63717749705369e-311	SNHG12	310.578860638733	LyM vs PT
PFKFB3	1.38201184734487e-315	-1.64581	0.036	0.204	2.64309765804706e-311	PFKFB3	310.577886790116	LyM vs PT
UBE2Q1	1.41994464638512e-315	-0.467527	0.204	0.517	2.71564413621154e-311	UBE2Q1	310.566127141536	LyM vs PT
VAMP4	3.18832844721443e-315	-1.16501	0.048	0.232	6.0976781552976e-311	VAMP4	310.214835502087	LyM vs PT
ERBB2	9.92516980011033e-315	-0.686106	0.554	0.807	1.8981887242711e-310	ERBB2	309.721660610752	LyM vs PT
SERTAD2	1.00083640814232e-314	-0.81685	0.081	0.298	1.91409963057218e-310	SERTAD2	309.71803546056	LyM vs PT
KDM3A	1.05498344959526e-314	-1.29487	0.055	0.244	2.01765584735093e-310	KDM3A	309.695152909627	LyM vs PT
C11orf58	1.09906792323228e-314	0.881397154156676	0.756	0.811	2.10196740318174e-310	C11orf58	309.677374023193	LyM vs PT
COPS7B	2.63602697441278e-314	-1.4024	0.034	0.201	5.04140158856445e-310	COPS7B	309.297448706103	LyM vs PT
SLC38A10	3.34234342328621e-314	-0.833848	0.054	0.245	6.39223179703488e-310	SLC38A10	309.194347484891	LyM vs PT
DIEXF	5.44736974803322e-314	-1.39101	0.041	0.216	1.04180946431135e-309	DIEXF	308.98221170154	LyM vs PT
HSD17B4	5.63426503097537e-314	-0.624772	0.154	0.428	1.07755318717404e-309	HSD17B4	308.967561284206	LyM vs PT
INTS11	5.72947827235535e-314	-0.720654	0.112	0.356	1.09576271958796e-309	INTS11	308.960283479365	LyM vs PT
BCL2L11	7.87678660760451e-314	-1.24321	0.076	0.282	1.50643543870436e-309	BCL2L11	308.822049476148	LyM vs PT
ALG6	1.46303563622088e-313	-1.21065	0.051	0.237	2.79805565427242e-309	ALG6	308.553143651494	LyM vs PT
TSPYL5	1.53802651795258e-313	-2.30266	0.045	0.217	2.94147571558432e-309	TSPYL5	308.531434732737	LyM vs PT
PPP1CA	2.21156836885784e-313	-0.713249	0.363	0.695	4.22962450544062e-309	PPP1CA	308.373698186396	LyM vs PT
EXOSC10	3.36589485160338e-313	-0.867223	0.093	0.319	6.43727390369146e-309	EXOSC10	308.191298011404	LyM vs PT
SNX14	3.48376028941438e-313	-0.741965	0.12	0.369	6.66269155350501e-309	SNX14	308.176350291746	LyM vs PT
MAPKAP1	4.14681840525579e-313	-0.524145	0.22	0.539	7.9307902000517e-309	MAPKAP1	308.100683538732	LyM vs PT
WTAP	5.90353677291221e-313	-0.728897	0.13	0.388	1.12905140781946e-308	WTAP	307.947286283386	LyM vs PT
TMEM109	1.50746404637472e-312	-0.856861	0.106	0.343	2.88302498869166e-308	TMEM109	307.540151593337	LyM vs PT
PPIH	4.93053636795631e-312	-0.880406	0.09	0.312	9.42965080371644e-308	PPIH	307.025504389641	LyM vs PT
PIK3C2A	1.21825349438387e-311	-0.74359	0.104	0.339	2.32990980800915e-307	PIK3C2A	306.632660890408	LyM vs PT
PCID2	2.83195120455557e-311	-1.06835	0.06	0.255	5.41610667871253e-307	PCID2	306.266312790128	LyM vs PT
FYTTD1	1.72061671185378e-310	-0.545749	0.174	0.461	3.29067946142035e-306	FYTTD1	305.482714419412	LyM vs PT
JMJD8	1.90683973860285e-310	-0.816956	0.094	0.321	3.64683100007795e-306	JMJD8	305.438084362114	LyM vs PT
CYTH2	2.0164856720056e-310	-0.997419	0.071	0.275	3.85652884771071e-306	CYTH2	305.413803415668	LyM vs PT
SNHG8	2.09171170305211e-310	-0.368625	0.386	0.767	4.00039863208717e-306	SNHG8	305.398	LyM vs PT
PDS5A	2.29927177691372e-310	-0.702432	0.119	0.365	4.39735727334748e-306	PDS5A	305.356808247698	LyM vs PT
C6orf106	2.47140155883291e-310	-0.917722	0.072	0.277	4.72655548126793e-306	C6orf106	305.325455239904	LyM vs PT
ATP1A1	3.02191109869609e-310	-0.726047	0.388	0.749	5.77940497625628e-306	ATP1A1	305.23811687245	LyM vs PT
ENPP4	3.44400718592545e-310	-1.16793	0.063	0.258	6.58666374308241e-306	ENPP4	305.181334507236	LyM vs PT
RPS15A	5.0670222639294e-310	0.846232561445474	0.792	0.857	9.69068007976497e-306	RPS15A	305.013645743638	LyM vs PT
TBX3	7.3748020152769e-310	-0.792558	0.107	0.342	1.41043088542171e-305	TBX3	304.850648190484	LyM vs PT
CD44	8.68310962931598e-310	-0.55336	0.173	0.459	1.66064471660668e-305	CD44	304.779723271896	LyM vs PT
ZNRD1	1.27549844127546e-309	-0.940161	0.088	0.308	2.43939076893932e-305	ZNRD1	304.612718623958	LyM vs PT
SLC25A3	2.69123916342024e-309	-0.654132	0.411	0.753	5.14699490004121e-305	SLC25A3	304.288446262075	LyM vs PT
SDHC	3.37005402654662e-309	-0.549636	0.368	0.727	6.44522832577042e-305	SDHC	304.190761692916	LyM vs PT
PLPBP	5.18685107136831e-309	-0.720172	0.141	0.401	9.91985267399189e-305	PLPBP	304.00349477778	LyM vs PT
HSP90B1	1.04465562168444e-308	0.666493871061709	0.909	0.915	1.9979038764715e-304	HSP90B1	303.699425410465	LyM vs PT
AGTRAP	1.1173786518404e-308	-0.634753	0.154	0.425	2.13698667164477e-304	AGTRAP	303.670198186516	LyM vs PT
CHM	2.21832785753599e-308	-1.014	0.1	0.326	4.24255202753758e-304	CHM	303.37237282311	LyM vs PT
GALNT11	3.11414393654863e-308	-1.03756	0.071	0.274	5.95580027864926e-304	GALNT11	303.225059874274	LyM vs PT
SNF8	3.20334532894416e-308	-0.527919	0.221	0.537	6.12639794160571e-304	SNF8	303.212794796914	LyM vs PT
ALG2	3.4670019454589e-308	-0.721459	0.103	0.335	6.63064122069015e-304	ALG2	303.17844447082	LyM vs PT
NIT1	4.10590576455343e-308	-0.706515	0.112	0.353	7.85254477470844e-304	NIT1	303.104989578603	LyM vs PT
MTHFD1	4.14439000205711e-308	-1.08784	0.055	0.243	7.92614587893423e-304	MTHFD1	303.100937938836	LyM vs PT
ST7L	5.14996487841512e-308	-1.35618	0.042	0.216	9.84930782996893e-304	ST7L	303.006594288912	LyM vs PT
IFITM3	7.87208244760465e-308	1.01653905163981	0.769	0.74	1.50553576810439e-303	IFITM3	302.82230892218	LyM vs PT
INTS14	9.35801898536261e-308	-1.12118	0.056	0.246	1.7897211309506e-303	INTS14	302.747214634229	LyM vs PT
CPB1	9.37294827693839e-308	6.23841060625494	0.296	0.106	1.79257635796447e-303	CPB1	302.746522335724	LyM vs PT
TCAIM	1.05127559076611e-307	-1.526	0.036	0.202	2.01056456734019e-303	TCAIM	302.696681975389	LyM vs PT
ATP13A3	1.54845096369707e-307	-1.52396	0.037	0.205	2.96141246807065e-303	ATP13A3	302.52850109949	LyM vs PT
PSMD6	2.03033385699082e-307	-0.521671	0.18	0.472	3.88301350149494e-303	PSMD6	302.410831099381	LyM vs PT
CNPY3	2.07216319671766e-307	-0.767024	0.093	0.318	3.96301211372252e-303	CNPY3	302.401974600158	LyM vs PT
TXNDC11	2.8670593847183e-307	-1.22012	0.062	0.256	5.48325107327376e-303	TXNDC11	302.260961867696	LyM vs PT
STIP1	3.1617787537259e-307	-0.686606	0.317	0.65	6.04690186650079e-303	STIP1	302.218467079382	LyM vs PT
CLDND1	4.17054664698901e-307	-0.764908	0.086	0.304	7.97617046236648e-303	CLDND1	302.098205573092	LyM vs PT
AGA	4.65734061553083e-307	-0.629491	0.139	0.399	8.90716392720272e-303	AGA	302.050260554867	LyM vs PT
DOPEY2	8.24372319887905e-307	-1.08356	0.046	0.225	1.57661206178562e-302	DOPEY2	301.802275155214	LyM vs PT
C16orf74	9.41792174999406e-307	-1.76109	0.04	0.207	1.80117753468636e-302	C16orf74	301.744443478444	LyM vs PT
EBNA1BP2	1.14895696331169e-306	-0.563694	0.217	0.528	2.1973801923336e-302	EBNA1BP2	301.658094794628	LyM vs PT
HMGA1	1.35717212847787e-306	-0.540963	0.145	0.413	2.59559169571392e-302	HMGA1	301.585763623984	LyM vs PT
BIK	1.36733103129187e-306	2.69624439755989	0.36	0.166	2.6150205973457e-302	BIK	301.58252488604	LyM vs PT
CNST	2.17347112361679e-306	-0.882982	0.089	0.308	4.15676352391711e-302	CNST	301.381244681575	LyM vs PT
SRRM1	2.25611503690905e-306	1.20545270405586	0.678	0.694	4.31482000808855e-302	SRRM1	301.365037316084	LyM vs PT
NIT2	2.63402257067737e-306	-0.656073	0.179	0.464	5.03756816642048e-302	NIT2	301.297779064106	LyM vs PT
NHLRC2	2.66049971643446e-306	-1.20437	0.062	0.256	5.08820570768091e-302	NHLRC2	301.293435339202	LyM vs PT
RAB22A	6.92383709070504e-306	-0.602691	0.162	0.438	1.32418384359734e-301	RAB22A	300.878051715261	LyM vs PT
ERLIN1	7.71211773227708e-306	-1.01711	0.069	0.27	1.47494251629799e-301	ERLIN1	300.831224905341	LyM vs PT
[truncated: 8,916 more rows]
