# Supplementary material
Source: Research Square preprint supplement (doi:10.21203/rs.3.rs-9551458/v1)
Supplement: Supplementary file 5 [file 9b4a7499cead84f6c8007bcc.xlsx]

## Sheet: Target_gene_GO_enrich
GO functional enrichment analysis of the predicted target genes
ID	Description	GeneRatio	BgRatio	RichFactor	FoldEnrichment	zScore	pvalue	p.adjust	qvalue	geneID	Count	Target_gene_origin
GO:0045599	negative regulation of fat cell differentiation	5/65	62/18805	0.0806451612903226	23.3312655086849	10.3725761916304	2.34490244439037e-06	0.00363991798719607	0.0029062581043967	SOD2/WNT5A/MMP11/FERMT2/TGFB1I1	5	PT
GO:0001503	ossification	10/65	458/18805	0.0218340611353712	6.31676184077931	6.78413406667363	3.59498072809488e-06	0.00363991798719607	0.0029062581043967	CDH11/VCAN/COL1A2/HSPE1/WNT5A/CTHRC1/GPM6B/GRP/FERMT2/FHL2	10	PT
GO:0061043	regulation of vascular wound healing	3/65	16/18805	0.1875	54.2451923076923	12.5483193949635	2.13747628190219e-05	0.0129790146803742	0.0103629715654605	CXCR4/TNFAIP3/SMOC2	3	PT
GO:0045444	fat cell differentiation	7/65	252/18805	0.0277777777777778	8.03632478632479	6.62271524243337	2.56375598624675e-05	0.0129790146803742	0.0103629715654605	FABP4/SOD2/C1QTNF3/WNT5A/MMP11/FERMT2/TGFB1I1	7	PT
GO:0070228	regulation of lymphocyte apoptotic process	4/65	62/18805	0.0645161290322581	18.6650124069479	8.20516361000246	6.2379381842327e-05	0.0244160042730507	0.0194947277782487	WNT5A/PIP/FOXP1/TSC22D3	4	PT
GO:0061042	vascular wound healing	3/65	25/18805	0.12	34.7169230769231	9.93498353713684	8.58584189074129e-05	0.0244160042730507	0.0194947277782487	CXCR4/TNFAIP3/SMOC2	3	PT
GO:0071560	cellular response to transforming growth factor beta stimulus	7/65	308/18805	0.0227272727272727	6.57517482517482	5.81005450676821	9.11710440511384e-05	0.0244160042730507	0.0194947277782487	COL1A2/ACTA2/CILP/WNT5A/FERMT2/POSTN/TGFB1I1	7	PT
GO:0071559	response to transforming growth factor beta	7/65	315/18805	0.0222222222222222	6.42905982905983	5.72279850847245	0.000104863580419647	0.0244160042730507	0.0194947277782487	COL1A2/ACTA2/CILP/WNT5A/FERMT2/POSTN/TGFB1I1	7	PT
GO:0071356	cellular response to tumor necrosis factor	6/65	219/18805	0.0273972602739726	7.92623814541623	6.07188471527015	0.000108515574546892	0.0244160042730507	0.0194947277782487	FABP4/TNFAIP3/SPHK1/FOXP1/AKAP12/POSTN	6	PT
GO:0045598	regulation of fat cell differentiation	5/65	147/18805	0.0340136054421769	9.84039769754056	6.33716379112312	0.000154428158919553	0.0254933910798604	0.0203549570883252	SOD2/WNT5A/MMP11/FERMT2/TGFB1I1	5	PT
GO:0030198	extracellular matrix organization	7/65	339/18805	0.0206489675516224	5.9739051508963	5.44261907090767	0.000165101420348766	0.0254933910798604	0.0203549570883252	COL1A2/NID2/GPM6B/LUM/MMP11/SMOC2/POSTN	7	PT
GO:0043062	extracellular structure organization	7/65	340/18805	0.0205882352941176	5.95633484162896	5.43153331560593	0.000168116989088045	0.0254933910798604	0.0203549570883252	COL1A2/NID2/GPM6B/LUM/MMP11/SMOC2/POSTN	7	PT
GO:0045229	external encapsulating structure organization	7/65	341/18805	0.0205278592375367	5.93886758402887	5.42049168448079	0.000171177087426954	0.0254933910798604	0.0203549570883252	COL1A2/NID2/GPM6B/LUM/MMP11/SMOC2/POSTN	7	PT
GO:0034612	response to tumor necrosis factor	6/65	241/18805	0.024896265560166	7.20268113629109	5.70754314988541	0.000182824004120611	0.0254933910798604	0.0203549570883252	FABP4/TNFAIP3/SPHK1/FOXP1/AKAP12/POSTN	6	PT
GO:0010038	response to metal ion	7/65	347/18805	0.0201729106628242	5.83617823099091	5.35515099385934	0.000190500673162936	0.0254933910798604	0.0203549570883252	FABP4/SOD2/CALM2/WNT5A/TFF1/MT1X/BACE1	7	PT
GO:0070227	lymphocyte apoptotic process	4/65	85/18805	0.0470588235294118	13.614479638009	6.86472093594679	0.000213336859927749	0.0254933910798604	0.0203549570883252	WNT5A/PIP/FOXP1/TSC22D3	4	PT
GO:0060055	angiogenesis involved in wound healing	3/65	34/18805	0.0882352941176471	25.527149321267	8.43024	0.00021847378911492	0.0254933910798604	0.0203549570883252	CXCR4/TNFAIP3/SMOC2	3	PT
GO:0032496	response to lipopolysaccharide	7/65	357/18805	0.0196078431372549	5.67269984917044	5.24957753346763	0.000226607920709871	0.0254933910798604	0.0203549570883252	TNFAIP3/SOD2/WNT5A/GJB2/DIO2/FOXP1/AKAP12	7	PT
GO:0034599	cellular response to oxidative stress	6/65	254/18805	0.0236220472440945	6.83403997577226	5.51314738201686	0.000242762896453839	0.0258734139641591	0.0206583827674846	TNFAIP3/SOD2/SPHK1/GJB2/GPX8/FOXP1	6	PT
GO:0055006	cardiac cell development	4/65	94/18805	0.0425531914893617	12.3109656301146	6.47458767862585	0.000313917627478463	0.0290167505579074	0.0231681501530582	INHBA/RGS4/FHL2/FOXP1	4	PT
GO:0002237	response to molecule of bacterial origin	7/65	379/18805	0.0184696569920844	5.34341384209458	5.03074482301901	0.000325650448288012	0.0290167505579074	0.0231681501530582	TNFAIP3/SOD2/WNT5A/GJB2/DIO2/FOXP1/AKAP12	7	PT
GO:2000106	regulation of leukocyte apoptotic process	4/65	95/18805	0.0421052631578947	12.1813765182186	6.43453529179476	0.000326870773286348	0.0290167505579074	0.0231681501530582	WNT5A/PIP/FOXP1/TSC22D3	4	PT
GO:0070229	negative regulation of lymphocyte apoptotic process	3/65	39/18805	0.0769230769230769	22.2544378698225	7.82515731409994	0.000329572969299689	0.0290167505579074	0.0231681501530582	PIP/FOXP1/TSC22D3	3	PT
GO:0070232	regulation of T cell apoptotic process	3/65	42/18805	0.0714285714285714	20.6648351648352	7.51382061710612	0.000410944835828644	0.0334343024287252	0.0266953026799334	WNT5A/PIP/TSC22D3	3	PT
GO:0120162	positive regulation of cold-induced thermogenesis	4/65	101/18805	0.0396039603960396	11.4577303884235	6.20623030074792	0.00041276916578673	0.0334343024287252	0.0266953026799334	FABP4/CXCR4/FABP5/DIO2	4	PT
GO:0032602	chemokine production	4/65	105/18805	0.0380952380952381	11.0212454212454	6.06446579319102	0.000478299690438226	0.0358724767828669	0.0286420399420318	C1QTNF3/WNT5A/FOXP1/POSTN	4	PT
GO:0032642	regulation of chemokine production	4/65	105/18805	0.0380952380952381	11.0212454212454	6.06446579319102	0.000478299690438226	0.0358724767828669	0.0286420399420318	C1QTNF3/WNT5A/FOXP1/POSTN	4	PT
GO:0032611	interleukin-1 beta production	4/65	111/18805	0.036036036036036	10.4255024255024	5.86559247387786	0.000590040244147642	0.0412010860137578	0.0328966176047469	TNFAIP3/WNT5A/SPHK1/FOXP1	4	PT
GO:0032651	regulation of interleukin-1 beta production	4/65	111/18805	0.036036036036036	10.4255024255024	5.86559247387786	0.000590040244147642	0.0412010860137578	0.0328966176047469	TNFAIP3/WNT5A/SPHK1/FOXP1	4	PT
GO:1905461	positive regulation of vascular associated smooth muscle cell apoptotic process	2/65	12/18805	0.166666666666667	48.2179487179487	9.63599772101083	0.000759298567025851	0.0512526532742449	0.0409221964544459	SOD2/GRP	2	PT
GO:0062197	cellular response to chemical stress	6/65	323/18805	0.0185758513931889	5.3741366992141	4.66999199223875	0.000864121599873594	0.0537336548135761	0.0429031286776623	TNFAIP3/SOD2/SPHK1/GJB2/GPX8/FOXP1	6	PT
GO:0071887	leukocyte apoptotic process	4/65	124/18805	0.032258064516129	9.33250620347395	5.48256051911179	0.000893775633951023	0.0537336548135761	0.0429031286776623	WNT5A/PIP/FOXP1/TSC22D3	4	PT
GO:0061052	negative regulation of cell growth involved in cardiac muscle cell development	2/65	13/18805	0.153846153846154	44.508875739645	9.24187397241955	0.000895353273512699	0.0537336548135761	0.0429031286776623	RGS4/FOXP1	2	PT
GO:0042060	wound healing	7/65	450/18805	0.0155555555555556	4.50034188034188	4.42625604590319	0.000902194698104487	0.0537336548135761	0.0429031286776623	CXCR4/TNFAIP3/WNT5A/PLPP3/CD59/SMOC2/FERMT2	7	PT
GO:0032612	interleukin-1 production	4/65	131/18805	0.0305343511450382	8.83382266588373	5.29892427363299	0.00109631945432885	0.0558313701995921	0.0445780296954248	TNFAIP3/WNT5A/SPHK1/FOXP1	4	PT
GO:0032652	regulation of interleukin-1 production	4/65	131/18805	0.0305343511450382	8.83382266588373	5.29892427363299	0.00109631945432885	0.0558313701995921	0.0445780296954248	TNFAIP3/WNT5A/SPHK1/FOXP1	4	PT
GO:2000107	negative regulation of leukocyte apoptotic process	3/65	59/18805	0.0508474576271186	14.7105606258149	6.21189232597253	0.00111601876509341	0.0558313701995921	0.0445780296954248	PIP/FOXP1/TSC22D3	3	PT
GO:0010595	positive regulation of endothelial cell migration	4/65	133/18805	0.0300751879699248	8.70098322729902	5.24896388839998	0.00115964635147869	0.0558313701995921	0.0445780296954248	WNT5A/PLPP3/SMOC2/FOXP1	4	PT
GO:0010763	positive regulation of fibroblast migration	2/65	15/18805	0.133333333333333	38.574358974359	8.5737501992179	0.00119991970171051	0.0558313701995921	0.0445780296954248	ACTA2/AKAP12	2	PT
GO:0050966	detection of mechanical stimulus involved in sensory perception of pain	2/65	15/18805	0.133333333333333	38.574358974359	8.5737501992179	0.00119991970171051	0.0558313701995921	0.0445780296954248	CXCR4/BACE1	2	PT
GO:0072537	fibroblast activation	2/65	15/18805	0.133333333333333	38.574358974359	8.5737501992179	0.00119991970171051	0.0558313701995921	0.0445780296954248	ACTA2/AKAP12	2	PT
GO:0070231	T cell apoptotic process	3/65	61/18805	0.0491803278688525	14.2282471626734	6.09442991217938	0.00122945965667298	0.0558313701995921	0.0445780296954248	WNT5A/PIP/TSC22D3	3	PT
GO:0048588	developmental cell growth	5/65	232/18805	0.021551724137931	6.23507957559682	4.7252333111941	0.00123859636861569	0.0558313701995921	0.0445780296954248	CXCR4/WNT5A/RGS4/FOXP1/POSTN	5	PT
GO:0045926	negative regulation of growth	5/65	233/18805	0.0214592274678112	6.20831957741829	4.71132705572704	0.00126242056332154	0.0558313701995921	0.0445780296954248	INHBA/WNT5A/RGS4/FOXP1/MT1X	5	PT
GO:0016055	Wnt signaling pathway	7/65	477/18805	0.0146750524109015	4.24560554749234	4.22857847494114	0.00126454817959791	0.0558313701995921	0.0445780296954248	TNFAIP3/APCDD1/WNT5A/CTHRC1/PLPP3/FERMT2/TGFB1I1	7	PT
GO:0042063	gliogenesis	6/65	348/18805	0.0172413793103448	4.98806366047745	4.42250318546591	0.00126826816255864	0.0558313701995921	0.0445780296954248	CXCR4/VCAN/APCDD1/GPM6B/PLPP3/CNTN1	6	PT
GO:0061041	regulation of wound healing	4/65	140/18805	0.0285714285714286	8.26593406593406	5.08204468767582	0.00140152046143357	0.0602542216687317	0.0481094136364766	CXCR4/TNFAIP3/SMOC2/FERMT2	4	PT
GO:0007160	cell-matrix adhesion	5/65	240/18805	0.0208333333333333	6.02724358974359	4.61620491850263	0.00143881521730224	0.0602542216687317	0.0481094136364766	CDH11/NID2/GPM6B/FERMT2/POSTN	5	PT
GO:0016049	cell growth	7/65	492/18805	0.0142276422764228	4.11616635397123	4.12496667269853	0.0015103006735447	0.0602542216687317	0.0481094136364766	CXCR4/INHBA/WNT5A/RGS4/SPHK1/FOXP1/POSTN	7	PT
GO:0034763	negative regulation of transmembrane transport	4/65	143/18805	0.027972027972028	8.09252286175363	5.01402709917101	0.00151521665791758	0.0602542216687317	0.0481094136364766	CALM2/GRP/FABP5/RGS4	4	PT
GO:0090303	positive regulation of wound healing	3/65	66/18805	0.0454545454545455	13.1503496503496	5.82350622804716	0.00154412435477693	0.0602542216687317	0.0481094136364766	CXCR4/SMOC2/FERMT2	3	PT
GO:0010042	response to manganese ion	2/65	17/18805	0.117647058823529	34.0361990950226	8.02548460506316	0.00154726890211064	0.0602542216687317	0.0481094136364766	SOD2/BACE1	2	PT
GO:0003159	morphogenesis of an endothelium	2/65	18/18805	0.111111111111111	32.1452991452991	7.78568892695435	0.0017368034558194	0.0625844404055447	0.0499699547565519	CXCR4/FOXP1	2	PT
GO:0061154	endothelial tube morphogenesis	2/65	18/18805	0.111111111111111	32.1452991452991	7.78568892695435	0.0017368034558194	0.0625844404055447	0.0499699547565519	CXCR4/FOXP1	2	PT
GO:0090520	sphingolipid mediated signaling pathway	2/65	18/18805	0.111111111111111	32.1452991452991	7.78568892695435	0.0017368034558194	0.0625844404055447	0.0499699547565519	PLPP3/SPHK1	2	PT
GO:0030199	collagen fibril organization	3/65	69/18805	0.0434782608695652	12.5785953177258	5.67464879352548	0.00175500270413888	0.0625844404055447	0.0499699547565519	COL1A2/LUM/MMP11	3	PT
GO:0034614	cellular response to reactive oxygen species	4/65	149/18805	0.0268456375838926	7.76664945792463	4.88376268969193	0.00176163610030422	0.0625844404055447	0.0499699547565519	TNFAIP3/SOD2/SPHK1/FOXP1	4	PT
GO:0120161	regulation of cold-induced thermogenesis	4/65	151/18805	0.0264900662251656	7.66377992868059	4.84194820919708	0.00184960864494399	0.0642958789677328	0.0513364366962639	FABP4/CXCR4/FABP5/DIO2	4	PT
GO:0106106	cold-induced thermogenesis	4/65	152/18805	0.0263157894736842	7.61336032388664	4.82132758609488	0.00189471835971815	0.0642958789677328	0.0513364366962639	FABP4/CXCR4/FABP5/DIO2	4	PT
GO:1905288	vascular associated smooth muscle cell apoptotic process	2/65	19/18805	0.105263157894737	30.4534412955466	7.56471711666079	0.00193681413186751	0.0642958789677328	0.0513364366962639	SOD2/GRP	2	PT
GO:1905459	regulation of vascular associated smooth muscle cell apoptotic process	2/65	19/18805	0.105263157894737	30.4534412955466	7.56471711666079	0.00193681413186751	0.0642958789677328	0.0513364366962639	SOD2/GRP	2	PT
GO:0001649	osteoblast differentiation	5/65	262/18805	0.0190839694656489	5.52113916617733	4.34016	0.00211243953172225	0.0665992826274431	0.0531755675715413	VCAN/HSPE1/CTHRC1/FERMT2/FHL2	5	PT
GO:0034393	positive regulation of smooth muscle cell apoptotic process	2/65	20/18805	0.1	28.9307692307692	7.36019466805749	0.00214722850032548	0.0665992826274431	0.0531755675715413	SOD2/GRP	2	PT
GO:0043116	negative regulation of vascular permeability	2/65	20/18805	0.1	28.9307692307692	7.36019466805749	0.00214722850032548	0.0665992826274431	0.0531755675715413	FERMT2/AKAP12	2	PT
GO:0042552	myelination	4/65	158/18805	0.0253164556962025	7.32424537487829	4.70142785587715	0.00218151961964694	0.0665992826274431	0.0531755675715413	CXCR4/GPM6B/TYMP/CNTN1	4	PT
GO:0007272	ensheathment of neurons	4/65	160/18805	0.025	7.23269230769231	4.66285049810187	0.00228342696468351	0.0665992826274431	0.0531755675715413	CXCR4/GPM6B/TYMP/CNTN1	4	PT
GO:0008366	axon ensheathment	4/65	160/18805	0.025	7.23269230769231	4.66285049810187	0.00228342696468351	0.0665992826274431	0.0531755675715413	CXCR4/GPM6B/TYMP/CNTN1	4	PT
GO:0006670	sphingosine metabolic process	2/65	21/18805	0.0952380952380952	27.5531135531136	7.17014711682985	0.0023679744934202	0.0665992826274431	0.0531755675715413	PLPP3/SPHK1	2	PT
GO:0010800	positive regulation of peptidyl-threonine phosphorylation	2/65	21/18805	0.0952380952380952	27.5531135531136	7.17014711682985	0.0023679744934202	0.0665992826274431	0.0531755675715413	CALM2/SPHK1	2	PT
GO:0061050	regulation of cell growth involved in cardiac muscle cell development	2/65	21/18805	0.0952380952380952	27.5531135531136	7.17014711682985	0.0023679744934202	0.0665992826274431	0.0531755675715413	RGS4/FOXP1	2	PT
GO:0072567	chemokine (C-X-C motif) ligand 2 production	2/65	21/18805	0.0952380952380952	27.5531135531136	7.17014711682985	0.0023679744934202	0.0665992826274431	0.0531755675715413	FOXP1/POSTN	2	PT
GO:2000341	regulation of chemokine (C-X-C motif) ligand 2 production	2/65	21/18805	0.0952380952380952	27.5531135531136	7.17014711682985	0.0023679744934202	0.0665992826274431	0.0531755675715413	FOXP1/POSTN	2	PT
GO:0141091	transforming growth factor beta receptor superfamily signaling pathway	6/65	399/18805	0.0150375939849624	4.35049161364951	3.98393533446839	0.00252757483029434	0.0701142333061101	0.0559820467099078	COL1A2/INHBA/CILP/WNT5A/FERMT2/TGFB1I1	6	PT
GO:0021756	striatum development	2/65	22/18805	0.0909090909090909	26.3006993006993	6.99291730525468	0.0025989804039591	0.0704375435905998	0.0562401907499214	INHBA/FOXP1	2	PT
GO:0035051	cardiocyte differentiation	4/65	166/18805	0.0240963855421687	6.97126969416126	4.55099578023282	0.00260879791076296	0.0704375435905998	0.0562401907499214	INHBA/RGS4/FHL2/FOXP1	4	PT
GO:0003018	vascular process in circulatory system	5/65	278/18805	0.0179856115107914	5.20337576092972	4.15829282629059	0.00272991384558791	0.0710043720940145	0.0566927696095679	SOD2/ACTA2/FABP5/FERMT2/AKAP12	5	PT
GO:1903036	positive regulation of response to wounding	3/65	81/18805	0.037037037037037	10.7150997150997	5.16044866379593	0.00277497900294342	0.0710043720940145	0.0566927696095679	CXCR4/SMOC2/FERMT2	3	PT
GO:1990845	adaptive thermogenesis	4/65	169/18805	0.0236686390532544	6.84751934456076	4.49713241150603	0.00278285463989008	0.0710043720940145	0.0566927696095679	FABP4/CXCR4/FABP5/DIO2	4	PT
GO:0021537	telencephalon development	5/65	280/18805	0.0178571428571429	5.16620879120879	4.13654682325224	0.00281539404374479	0.0710043720940145	0.0566927696095679	CXCR4/INHBA/WNT5A/TMEM14B/FOXP1	5	PT
GO:0006979	response to oxidative stress	6/65	408/18805	0.0147058823529412	4.25452488687783	3.91418348813081	0.00282317094087087	0.0710043720940145	0.0566927696095679	TNFAIP3/SOD2/SPHK1/GJB2/GPX8/FOXP1	6	PT
GO:0046519	sphingoid metabolic process	2/65	23/18805	0.0869565217391304	25.1571906354515	6.82710264901726	0.00284017488376058	0.0710043720940145	0.0566927696095679	PLPP3/SPHK1	2	PT
GO:0001558	regulation of cell growth	6/65	410/18805	0.0146341463414634	4.23377110694184	3.89895582761653	0.00289224571978553	0.071139330201522	0.0568005256345876	CXCR4/INHBA/WNT5A/RGS4/SPHK1/FOXP1	6	PT
GO:0014823	response to activity	3/65	83/18805	0.036144578313253	10.4569045412419	5.08521052620105	0.00297375596392011	0.071139330201522	0.0568005256345876	CXCR4/SOD2/POSTN	3	PT
GO:0019233	sensory perception of pain	3/65	83/18805	0.036144578313253	10.4569045412419	5.08521052620105	0.00297375596392011	0.071139330201522	0.0568005256345876	CXCR4/FABP5/BACE1	3	PT
GO:0001934	positive regulation of protein phosphorylation	6/65	414/18805	0.0144927536231884	4.19286510590858	3.86878927519907	0.00303419780691445	0.071139330201522	0.0568005256345876	CCND2/CALM2/WNT5A/PLPP3/PFN2/SPHK1	6	PT
GO:0030308	negative regulation of cell growth	4/65	174/18805	0.0229885057471264	6.65075154730327	4.4102149808157	0.00309039047468012	0.071139330201522	0.0568005256345876	INHBA/WNT5A/RGS4/FOXP1	4	PT
GO:0055002	striated muscle cell development	4/65	174/18805	0.0229885057471264	6.65075154730327	4.4102149808157	0.00309039047468012	0.071139330201522	0.0568005256345876	KRT19/RGS4/FHL2/FOXP1	4	PT
GO:0030277	maintenance of gastrointestinal epithelium	2/65	24/18805	0.0833333333333333	24.1089743589744	6.67150693053326	0.00309148694209083	0.071139330201522	0.0568005256345876	TFF1/TFF3	2	PT
GO:0048041	focal adhesion assembly	3/65	85/18805	0.0352941176470588	10.2108597285068	5.01249226530356	0.00318109028741565	0.0723787396855808	0.0577901204195203	CDH11/GPM6B/FERMT2	3	PT
GO:0070233	negative regulation of T cell apoptotic process	2/65	25/18805	0.08	23.1446153846154	6.52510280313687	0.00335284594410678	0.0746100333716069	0.059571675768051	PIP/TSC22D3	2	PT
GO:0071280	cellular response to copper ion	2/65	25/18805	0.08	23.1446153846154	6.52510280313687	0.00335284594410678	0.0746100333716069	0.059571675768051	MT1X/BACE1	2	PT
GO:0055013	cardiac muscle cell development	3/65	87/18805	0.0344827586206897	9.97612732095491	4.9421499168752	0.00339709914637343	0.0746761723521152	0.0596244838117473	RGS4/FHL2/FOXP1	3	PT
GO:0007178	cell surface receptor protein serine/threonine kinase signaling pathway	6/65	427/18805	0.0140515222482436	4.06521347504954	3.77331051924575	0.00353182671477118	0.0746761723521152	0.0596244838117473	COL1A2/INHBA/CILP/WNT5A/FERMT2/TGFB1I1	6	PT
GO:1903034	regulation of response to wounding	4/65	181/18805	0.0220994475138122	6.39354016149596	4.29411557506846	0.00355888661254251	0.0746761723521152	0.0596244838117473	CXCR4/TNFAIP3/SMOC2/FERMT2	4	PT
GO:0090103	cochlea morphogenesis	2/65	26/18805	0.0769230769230769	22.2544378698225	6.38700230219345	0.00362418160930538	0.0746761723521152	0.0596244838117473	WNT5A/CTHRC1	2	PT
GO:0071248	cellular response to metal ion	4/65	182/18805	0.021978021978022	6.35841081994928	4.27803059141074	0.00362953610833143	0.0746761723521152	0.0596244838117473	FABP4/WNT5A/MT1X/BACE1	4	PT
GO:0048145	regulation of fibroblast proliferation	3/65	90/18805	0.0333333333333333	9.64358974358974	4.8408039109027	0.0037376248399029	0.0746761723521152	0.0596244838117473	SOD2/WNT5A/SPHK1	3	PT
GO:0001659	temperature homeostasis	4/65	184/18805	0.0217391304347826	6.28929765886288	4.24621935598417	0.00377368751645807	0.0746761723521152	0.0596244838117473	FABP4/CXCR4/FABP5/DIO2	4	PT
GO:0022010	central nervous system myelination	2/65	27/18805	0.0740740740740741	21.4301994301994	6.25643341749429	0.00390542400997908	0.0746761723521152	0.0596244838117473	GPM6B/CNTN1	2	PT
GO:0032291	axon ensheathment in central nervous system	2/65	27/18805	0.0740740740740741	21.4301994301994	6.25643341749429	0.00390542400997908	0.0746761723521152	0.0596244838117473	GPM6B/CNTN1	2	PT
GO:0035902	response to immobilization stress	2/65	27/18805	0.0740740740740741	21.4301994301994	6.25643341749429	0.00390542400997908	0.0746761723521152	0.0596244838117473	SOD2/TFF1	2	PT
GO:0042327	positive regulation of phosphorylation	6/65	437/18805	0.0137299771167048	3.97218799507129	3.70239767991802	0.00395427314614985	0.0746761723521152	0.0596244838117473	CCND2/CALM2/WNT5A/PLPP3/PFN2/SPHK1	6	PT
GO:1904063	negative regulation of cation transmembrane transport	3/65	92/18805	0.0326086956521739	9.43394648829431	4.7758431198753	0.00397580965553286	0.0746761723521152	0.0596244838117473	CALM2/GRP/RGS4	3	PT
GO:0001959	regulation of cytokine-mediated signaling pathway	4/65	189/18805	0.0211640211640212	6.12291412291412	4.1687111026212	0.00415098753590974	0.0746761723521152	0.0596244838117473	CXCR4/TNFAIP3/WNT5A/SPHK1	4	PT
GO:0050727	regulation of inflammatory response	6/65	442/18805	0.0135746606334842	3.92725374173338	3.66772439315349	0.0041790721625505	0.0746761723521152	0.0596244838117473	FABP4/TNFAIP3/C1QTNF3/WNT5A/SPHK1/FOXP1	6	PT
GO:0001702	gastrulation with mouth forming second	2/65	28/18805	0.0714285714285714	20.6648351648352	6.13272130723572	0.00419650356967746	0.0746761723521152	0.0596244838117473	WNT5A/PLPP3	2	PT
GO:0021544	subpallium development	2/65	28/18805	0.0714285714285714	20.6648351648352	6.13272130723572	0.00419650356967746	0.0746761723521152	0.0596244838117473	INHBA/FOXP1	2	PT
GO:0034698	response to gonadotropin	2/65	28/18805	0.0714285714285714	20.6648351648352	6.13272130723572	0.00419650356967746	0.0746761723521152	0.0596244838117473	INHBA/GJB2	2	PT
GO:0055022	negative regulation of cardiac muscle tissue growth	2/65	28/18805	0.0714285714285714	20.6648351648352	6.13272130723572	0.00419650356967746	0.0746761723521152	0.0596244838117473	RGS4/FOXP1	2	PT
GO:0061117	negative regulation of heart growth	2/65	28/18805	0.0714285714285714	20.6648351648352	6.13272130723572	0.00419650356967746	0.0746761723521152	0.0596244838117473	RGS4/FOXP1	2	PT
GO:0032640	tumor necrosis factor production	4/65	191/18805	0.0209424083769634	6.05879983890455	4.13848448317809	0.00430880206455497	0.0746761723521152	0.0596244838117473	TNFAIP3/WNT5A/FOXP1/AKAP12	4	PT
GO:0032680	regulation of tumor necrosis factor production	4/65	191/18805	0.0209424083769634	6.05879983890455	4.13848448317809	0.00430880206455497	0.0746761723521152	0.0596244838117473	TNFAIP3/WNT5A/FOXP1/AKAP12	4	PT
GO:0045766	positive regulation of angiogenesis	4/65	192/18805	0.0208333333333333	6.02724358974359	4.12353192227437	0.00438921048465344	0.0746761723521152	0.0596244838117473	CXCR4/WNT5A/SPHK1/SMOC2	4	PT
GO:0006006	glucose metabolic process	4/65	193/18805	0.0207253886010363	5.99601434834595	4.10868470970158	0.00447062752515739	0.0746761723521152	0.0596244838117473	C1QTNF3/FABP5/NNMT/TFF3	4	PT
GO:0007044	cell-substrate junction assembly	3/65	96/18805	0.03125	9.04086538461539	4.6516831689287	0.0044794526166582	0.0746761723521152	0.0596244838117473	CDH11/GPM6B/FERMT2	3	PT
GO:1901380	negative regulation of potassium ion transmembrane transport	2/65	29/18805	0.0689655172413793	19.9522546419098	6.01527310428689	0.0044973510616751	0.0746761723521152	0.0596244838117473	GRP/RGS4	2	PT
GO:0008217	regulation of blood pressure	4/65	194/18805	0.0206185567010309	5.96510705789056	4.09394151281568	0.00455305904388582	0.0746761723521152	0.0596244838117473	SOD2/COL1A2/ACTA2/POSTN	4	PT
GO:0001942	hair follicle development	3/65	97/18805	0.0309278350515464	8.94766058683584	4.62177186673765	0.00461111855727433	0.0746761723521152	0.0596244838117473	INHBA/APCDD1/WNT5A	3	PT
GO:1904018	positive regulation of vasculature development	4/65	195/18805	0.0205128205128205	5.93452	4.07930102271232	0.00463651087470028	0.0746761723521152	0.0596244838117473	CXCR4/WNT5A/SPHK1/SMOC2	4	PT
GO:0071706	tumor necrosis factor superfamily cytokine production	4/65	196/18805	0.0204081632653061	5.90423861852433	4.06476195368378	0.00472098882727579	0.0746761723521152	0.0596244838117473	TNFAIP3/WNT5A/FOXP1/AKAP12	4	PT
GO:1903555	regulation of tumor necrosis factor superfamily cytokine production	4/65	196/18805	0.0204081632653061	5.90423861852433	4.06476195368378	0.00472098882727579	0.0746761723521152	0.0596244838117473	TNFAIP3/WNT5A/FOXP1/AKAP12	4	PT
GO:0062149	detection of stimulus involved in sensory perception of pain	2/65	30/18805	0.0666666666666667	19.2871794871795	5.90356552999794	0.00480789760744554	0.0746761723521152	0.0596244838117473	CXCR4/BACE1	2	PT
GO:0034766	negative regulation of monoatomic ion transmembrane transport	3/65	99/18805	0.0303030303030303	8.76689976689977	4.56322453755417	0.00488144135764153	0.0746761723521152	0.0596244838117473	CALM2/GRP/RGS4	3	PT
GO:0042542	response to hydrogen peroxide	3/65	99/18805	0.0303030303030303	8.76689976689977	4.56322453755417	0.00488144135764153	0.0746761723521152	0.0596244838117473	TNFAIP3/SOD2/SPHK1	3	PT
GO:0070374	positive regulation of ERK1 and ERK2 cascade	4/65	198/18805	0.0202020202020202	5.84459984459985	4.0359830488506	0.00489304621412797	0.0746761723521152	0.0596244838117473	ACTA2/INHBA/FERMT2/AKAP12	4	PT
GO:0022404	molting cycle process	3/65	100/18805	0.03	8.67923076923077	4.53456747707183	0.00502012160332763	0.0746761723521152	0.0596244838117473	INHBA/APCDD1/WNT5A	3	PT
GO:0022405	hair cycle process	3/65	100/18805	0.03	8.67923076923077	4.53456747707183	0.00502012160332763	0.0746761723521152	0.0596244838117473	INHBA/APCDD1/WNT5A	3	PT
GO:0003298	physiological muscle hypertrophy	2/65	31/18805	0.0645161290322581	18.6650124069479	5.79713472220676	0.00512807467514139	0.0746761723521152	0.0596244838117473	RGS4/FOXP1	2	PT
GO:0003301	physiological cardiac muscle hypertrophy	2/65	31/18805	0.0645161290322581	18.6650124069479	5.79713472220676	0.00512807467514139	0.0746761723521152	0.0596244838117473	RGS4/FOXP1	2	PT
GO:0061049	cell growth involved in cardiac muscle cell development	2/65	31/18805	0.0645161290322581	18.6650124069479	5.79713472220676	0.00512807467514139	0.0746761723521152	0.0596244838117473	RGS4/FOXP1	2	PT
GO:0000302	response to reactive oxygen species	4/65	201/18805	0.0199004975124378	5.75736701109835	3.9935444833529	0.00515897203401935	0.0746761723521152	0.0596244838117473	TNFAIP3/SOD2/SPHK1/FOXP1	4	PT
GO:0060759	regulation of response to cytokine stimulus	4/65	201/18805	0.0199004975124378	5.75736701109835	3.9935444833529	0.00515897203401935	0.0746761723521152	0.0596244838117473	CXCR4/TNFAIP3/WNT5A/SPHK1	4	PT
GO:0043588	skin development	5/65	324/18805	0.0154320987654321	4.46462488129155	3.7047848996601	0.00522764256405552	0.0746761723521152	0.0596244838117473	COL1A2/INHBA/APCDD1/WNT5A/TCHH	5	PT
GO:0055001	muscle cell development	4/65	202/18805	0.0198019801980198	5.72886519421173	3.97958817521027	0.00524972733791816	0.0746761723521152	0.0596244838117473	KRT19/RGS4/FHL2/FOXP1	4	PT
GO:0043410	positive regulation of MAPK cascade	6/65	464/18805	0.0129310344827586	3.74104774535809	3.52096000241767	0.00528251488296806	0.0746761723521152	0.0596244838117473	ACTA2/INHBA/WNT5A/SPHK1/FERMT2/AKAP12	6	PT
GO:0060326	cell chemotaxis	5/65	325/18805	0.0153846153846154	4.4508875739645	3.69588555026291	0.00529538400004364	0.0746761723521152	0.0596244838117473	CXCR4/CXCL14/WNT5A/CH25H/SMOC2	5	PT
GO:0048640	negative regulation of developmental growth	3/65	102/18805	0.0294117647058824	8.50904977375566	4.47843668154897	0.00530457675804254	0.0746761723521152	0.0596244838117473	WNT5A/RGS4/FOXP1	3	PT
GO:0006935	chemotaxis	6/65	466/18805	0.0128755364806867	3.72499174645097	3.50806256788971	0.00539249941373309	0.0746761723521152	0.0596244838117473	CXCR4/CXCL14/WNT5A/CH25H/SMOC2/TYMP	6	PT
GO:0003012	muscle system process	6/65	467/18805	0.012847965738758	3.71701531872838	3.50164044123036	0.00544811952915616	0.0746761723521152	0.0596244838117473	CXCR4/ACTA2/CALM2/RGS4/SPHK1/FOXP1	6	PT
GO:0051051	negative regulation of transport	6/65	467/18805	0.012847965738758	3.71701531872838	3.50164044123036	0.00544811952915616	0.0746761723521152	0.0596244838117473	INHBA/CALM2/GPM6B/GRP/FABP5/RGS4	6	PT
GO:0010906	regulation of glucose metabolic process	3/65	103/18805	0.029126213592233	8.42643764002987	4.45094400769088	0.0054503738652351	0.0746761723521152	0.0596244838117473	C1QTNF3/NNMT/TFF3	3	PT
GO:0150115	cell-substrate junction organization	3/65	103/18805	0.029126213592233	8.42643764002987	4.45094400769088	0.0054503738652351	0.0746761723521152	0.0596244838117473	CDH11/GPM6B/FERMT2	3	PT
GO:0001516	prostaglandin biosynthetic process	2/65	32/18805	0.0625	18.0817307692308	5.69556782425853	0.00545781407808052	0.0746761723521152	0.0596244838117473	CTHRC1/FABP5	2	PT
GO:0001736	establishment of planar polarity	2/65	32/18805	0.0625	18.0817307692308	5.69556782425853	0.00545781407808052	0.0746761723521152	0.0596244838117473	WNT5A/CTHRC1	2	PT
GO:0007164	establishment of tissue polarity	2/65	32/18805	0.0625	18.0817307692308	5.69556782425853	0.00545781407808052	0.0746761723521152	0.0596244838117473	WNT5A/CTHRC1	2	PT
GO:0010644	cell communication by electrical coupling	2/65	32/18805	0.0625	18.0817307692308	5.69556782425853	0.00545781407808052	0.0746761723521152	0.0596244838117473	CALM2/GJB2	2	PT
GO:0034311	diol metabolic process	2/65	32/18805	0.0625	18.0817307692308	5.69556782425853	0.00545781407808052	0.0746761723521152	0.0596244838117473	PLPP3/SPHK1	2	PT
GO:0046457	prostanoid biosynthetic process	2/65	32/18805	0.0625	18.0817307692308	5.69556782425853	0.00545781407808052	0.0746761723521152	0.0596244838117473	CTHRC1/FABP5	2	PT
GO:0042330	taxis	6/65	468/18805	0.0128205128205128	3.70907297830375	3.49523591894612	0.00550416070709777	0.0748048686702885	0.0597272401702732	CXCR4/CXCL14/WNT5A/CH25H/SMOC2/TYMP	6	PT
GO:0010799	regulation of peptidyl-threonine phosphorylation	2/65	33/18805	0.0606060606060606	17.5337995337995	5.59849598562872	0.00579704797323829	0.0782601476387169	0.0624860749957475	CALM2/SPHK1	2	PT
GO:0032526	response to retinoic acid	3/65	106/18805	0.0283018867924528	8.18795355587809	4.37064980565848	0.00590217241526393	0.0786309154007201	0.0627821110100096	WNT5A/NDUFA13/GJB2	3	PT
GO:0090130	tissue migration	3/65	106/18805	0.0283018867924528	8.18795355587809	4.37064980565848	0.00590217241526393	0.0786309154007201	0.0627821110100096	ACTA2/WNT5A/PFN2	3	PT
GO:0050869	negative regulation of B cell activation	2/65	34/18805	0.0588235294117647	17.0180995475113	5.50558850237823	0.00614570885974601	0.0813402643201677	0.0649453650400403	TNFAIP3/INHBA	2	PT
GO:0043603	amide metabolic process	6/65	480/18805	0.0125	3.61634615384615	3.41972226374305	0.00621017899432355	0.0816598211915922	0.0652005122028775	SOD2/ALDH1L2/PLPP3/SPHK1/NNMT/BACE1	6	PT
GO:0048709	oligodendrocyte differentiation	3/65	109/18805	0.0275229357798165	7.96259703599153	4.29345748211559	0.00637579870644283	0.0832967250357854	0.0665074826016719	CXCR4/GPM6B/CNTN1	3	PT
GO:0043267	negative regulation of potassium ion transport	2/65	35/18805	0.0571428571428571	16.5318681318681	5.41654788431664	0.00650372957739514	0.0838013079256866	0.0669103620396905	GRP/RGS4	2	PT
GO:0048048	embryonic eye morphogenesis	2/65	35/18805	0.0571428571428571	16.5318681318681	5.41654788431664	0.00650372957739514	0.0838013079256866	0.0669103620396905	WNT5A/MFAP5	2	PT
GO:0048144	fibroblast proliferation	3/65	110/18805	0.0272727272727273	7.89020979020979	4.2683798345146	0.00653857118630048	0.0838013079256866	0.0669103620396905	SOD2/WNT5A/SPHK1	3	PT
GO:0022600	digestive system process	3/65	112/18805	0.0267857142857143	7.74931318681319	4.21916097744905	0.00687151892279573	0.0863315100488073	0.068930578003882	TFF1/TYMP/TFF3	3	PT
GO:0032963	collagen metabolic process	3/65	112/18805	0.0267857142857143	7.74931318681319	4.21916097744905	0.00687151892279573	0.0863315100488073	0.068930578003882	COL1A2/INHBA/MMP11	3	PT
GO:0062012	regulation of small molecule metabolic process	5/65	347/18805	0.0144092219020173	4.16869873642208	3.50873342071074	0.00694828943912015	0.0863315100488073	0.068930578003882	C1QTNF3/FABP5/CH25H/NNMT/TFF3	5	PT
GO:0042116	macrophage activation	3/65	113/18805	0.0265486725663717	7.68073519400953	4.19500612942988	0.00704171260699454	0.0863315100488073	0.068930578003882	WNT5A/SPHK1/FOXP1	3	PT
GO:0010562	positive regulation of phosphorus metabolic process	6/65	493/18805	0.0121703853955375	3.5209861132782	3.34058886756145	0.00704750721365352	0.0863315100488073	0.068930578003882	CCND2/CALM2/WNT5A/PLPP3/PFN2/SPHK1	6	PT
GO:0045937	positive regulation of phosphate metabolic process	6/65	493/18805	0.0121703853955375	3.5209861132782	3.34058886756145	0.00704750721365352	0.0863315100488073	0.068930578003882	CCND2/CALM2/WNT5A/PLPP3/PFN2/SPHK1	6	PT
GO:0030111	regulation of Wnt signaling pathway	5/65	350/18805	0.0142857142857143	4.13296703296703	3.48441463127886	0.00719876127220769	0.0863315100488073	0.068930578003882	TNFAIP3/APCDD1/WNT5A/CTHRC1/PLPP3	5	PT
GO:0071902	positive regulation of protein serine/threonine kinase activity	3/65	114/18805	0.0263157894736842	7.61336032388664	4.17114559019524	0.00721439815249866	0.0863315100488073	0.068930578003882	CCND2/CALM2/WNT5A	3	PT
GO:0010614	negative regulation of cardiac muscle hypertrophy	2/65	37/18805	0.0540540540540541	15.6382536382536	5.24901892867515	0.00724758355965295	0.0863315100488073	0.068930578003882	RGS4/FOXP1	2	PT
GO:0046621	negative regulation of organ growth	2/65	37/18805	0.0540540540540541	15.6382536382536	5.24901892867515	0.00724758355965295	0.0863315100488073	0.068930578003882	RGS4/FOXP1	2	PT
GO:0046688	response to copper ion	2/65	37/18805	0.0540540540540541	15.6382536382536	5.24901892867515	0.00724758355965295	0.0863315100488073	0.068930578003882	MT1X/BACE1	2	PT
GO:0099171	presynaptic modulation of chemical synaptic transmission	2/65	37/18805	0.0540540540540541	15.6382536382536	5.24901892867515	0.00724758355965295	0.0863315100488073	0.068930578003882	PFN2/BACE1	2	PT
GO:0009612	response to mechanical stimulus	4/65	223/18805	0.0179372197309417	5.18937564677475	3.70640193343431	0.00741029748460045	0.0877535228439527	0.0700659706761852	CXCR4/ETV1/BACE1/POSTN	4	PT
GO:0010669	epithelial structure maintenance	2/65	38/18805	0.0526315789473684	15.2267206477733	5.17006712223504	0.00763328419376899	0.0884335713646567	0.0706089489882327	TFF1/TFF3	2	PT
GO:0034391	regulation of smooth muscle cell apoptotic process	2/65	38/18805	0.0526315789473684	15.2267206477733	5.17006712223504	0.00763328419376899	0.0884335713646567	0.0706089489882327	SOD2/GRP	2	PT
GO:0071711	basement membrane organization	2/65	38/18805	0.0526315789473684	15.2267206477733	5.17006712223504	0.00763328419376899	0.0884335713646567	0.0706089489882327	NID2/MMP11	2	PT
GO:1901654	response to ketone	4/65	225/18805	0.0177777777777778	5.14324786324786	3.68219111377027	0.00764240740188392	0.0884335713646567	0.0706089489882327	INHBA/GJB2/FOXP1/POSTN	4	PT
GO:0010661	positive regulation of muscle cell apoptotic process	2/65	39/18805	0.0512820512820513	14.836291913215	5.09404960638559	0.00802807939509165	0.0908204512573218	0.0725147306725127	SOD2/GRP	2	PT
GO:0014741	negative regulation of muscle hypertrophy	2/65	39/18805	0.0512820512820513	14.836291913215	5.09404960638559	0.00802807939509165	0.0908204512573218	0.0725147306725127	RGS4/FOXP1	2	PT
GO:0034390	smooth muscle cell apoptotic process	2/65	39/18805	0.0512820512820513	14.836291913215	5.09404960638559	0.00802807939509165	0.0908204512573218	0.0725147306725127	SOD2/GRP	2	PT
GO:0050974	detection of mechanical stimulus involved in sensory perception	2/65	39/18805	0.0512820512820513	14.836291913215	5.09404960638559	0.00802807939509165	0.0908204512573218	0.0725147306725127	CXCR4/BACE1	2	PT
GO:0031589	cell-substrate adhesion	5/65	361/18805	0.0138504155124654	4.00703174941402	3.39751250634201	0.00817137528423831	0.091927971947681	0.0733990200970178	CDH11/NID2/GPM6B/FERMT2/POSTN	5	PT
GO:0045765	regulation of angiogenesis	5/65	363/18805	0.0137741046831956	3.98495443949989	3.38208109392255	0.00835756856233554	0.0935031841918755	0.0746567334210374	CXCR4/TNFAIP3/WNT5A/SPHK1/SMOC2	5	PT
GO:0042303	molting cycle	3/65	121/18805	0.0247933884297521	7.17291799109981	4.01185538299895	0.0084936831164447	0.0939874771081995	0.0750434125214786	INHBA/APCDD1/WNT5A	3	PT
GO:0042633	hair cycle	3/65	121/18805	0.0247933884297521	7.17291799109981	4.01185538299895	0.0084936831164447	0.0939874771081995	0.0750434125214786	INHBA/APCDD1/WNT5A	3	PT
GO:0010762	regulation of fibroblast migration	2/65	41/18805	0.0487804878048781	14.1125703564728	4.95010092896627	0.00884469191463863	0.0966233245452114	0.0771479799877555	ACTA2/AKAP12	2	PT
GO:0040036	regulation of fibroblast growth factor receptor signaling pathway	2/65	41/18805	0.0487804878048781	14.1125703564728	4.95010092896627	0.00884469191463863	0.0966233245452114	0.0771479799877555	WNT5A/SMOC2	2	PT
GO:0019722	calcium-mediated signaling	4/65	235/18805	0.0170212765957447	4.92438625204583	3.56530535268129	0.00887503129156016	0.0966233245452114	0.0771479799877555	CXCR4/CALM2/SPHK1/FHL2	4	PT
GO:0010594	regulation of endothelial cell migration	4/65	236/18805	0.0169491525423729	4.90352020860495	3.55398165506697	0.00900501576268975	0.097376096722256	0.0777490238156648	WNT5A/PLPP3/SMOC2/FOXP1	4	PT
GO:0031644	regulation of nervous system process	3/65	124/18805	0.0241935483870968	6.99937965260546	3.94742724689772	0.00908014741980526	0.097376096722256	0.0777490238156648	FABP5/RGS4/TYMP	3	PT
GO:0019318	hexose metabolic process	4/65	237/18805	0.0168776371308017	4.88283024991886	3.54272155737766	0.00913624135087027	0.097376096722256	0.0777490238156648	C1QTNF3/FABP5/NNMT/TFF3	4	PT
GO:1901342	regulation of vasculature development	5/65	372/18805	0.0134408602150538	3.88854425144748	3.31397699926483	0.00923209280486965	0.097376096722256	0.0777490238156648	CXCR4/TNFAIP3/WNT5A/SPHK1/SMOC2	5	PT
GO:0051154	negative regulation of striated muscle cell differentiation	2/65	42/18805	0.0476190476190476	13.7765567765568	4.88184899179774	0.00926637926857914	0.097376096722256	0.0777490238156648	RGS4/FOXP1	2	PT
GO:0007411	axon guidance	4/65	238/18805	0.0168067226890756	4.8623141564318	3.53152440668848	0.00926871268622259	0.097376096722256	0.0777490238156648	WNT5A/ETV1/NEXN/CNTN1	4	PT
GO:0001952	regulation of cell-matrix adhesion	3/65	125/18805	0.024	6.94338461538462	3.92642596151546	0.00928078353945452	0.097376096722256	0.0777490238156648	GPM6B/FERMT2/POSTN	3	PT
GO:0097485	neuron projection guidance	4/65	239/18805	0.0167364016736402	4.84196974573544	3.52038955954376	0.00940243436782034	0.0981439669836918	0.0783621225663161	WNT5A/ETV1/NEXN/CNTN1	4	PT
GO:2001258	negative regulation of cation channel activity	2/65	43/18805	0.0465116279069767	13.4561717352415	4.81588663947695	0.00969690125825636	0.100698589989585	0.0804018371534779	CALM2/GRP	2	PT
GO:0001667	ameboidal-type cell migration	4/65	243/18805	0.0164609053497942	4.76226654004432	3.47646065893704	0.00994991544605477	0.102798871317658	0.0820787869234164	ACTA2/WNT5A/PFN2/AKAP12	4	PT
GO:0043271	negative regulation of monoatomic ion transport	3/65	130/18805	0.0230769230769231	6.67633136094675	3.82477698212444	0.0103228805886761	0.10557491511146	0.0842952928453292	CALM2/GRP/RGS4	3	PT
GO:0055007	cardiac muscle cell differentiation	3/65	130/18805	0.0230769230769231	6.67633136094675	3.82477698212444	0.0103228805886761	0.10557491511146	0.0842952928453292	RGS4/FHL2/FOXP1	3	PT
GO:0051602	response to electrical stimulus	2/65	45/18805	0.0444444444444444	12.8581196581197	4.69032216915308	0.0105841928285056	0.107703469737305	0.0859948171625736	SOD2/AKAP12	2	PT
GO:0098773	skin epidermis development	3/65	133/18805	0.0225563909774436	6.52573742047426	3.76632376941595	0.0109794996674648	0.111167434133081	0.0887605867853993	INHBA/APCDD1/WNT5A	3	PT
GO:0030149	sphingolipid catabolic process	2/65	46/18805	0.0434782608695652	12.5785953177258	4.63049005354734	0.0110408350645653	0.111232293560919	0.0888123731823635	PLPP3/SPHK1	2	PT
GO:0002274	myeloid leukocyte activation	4/65	251/18805	0.0159362549800797	4.61048115231382	3.39140903722761	0.0111062528277401	0.111337435525612	0.0888963227900404	WNT5A/GRP/SPHK1/FOXP1	4	PT
GO:0007179	transforming growth factor beta receptor signaling pathway	4/65	252/18805	0.0158730158730159	4.59218559218559	3.38102958539569	0.0112566332314604	0.11228907533846	0.0896561506016242	COL1A2/CILP/FERMT2/TGFB1I1	4	PT
GO:0032970	regulation of actin filament-based process	5/65	392/18805	0.0127551020408163	3.69014913657771	3.16996246862664	0.0113985408150333	0.11310565980619	0.0903081447497374	ACTA2/GPM6B/RGS4/PFN2/FERMT2	5	PT
GO:0048247	lymphocyte chemotaxis	2/65	47/18805	0.0425531914893617	12.3109656301146	4.57248566103343	0.0115060572444815	0.11310565980619	0.0903081447497374	WNT5A/CH25H	2	PT
GO:0060071	Wnt signaling pathway, planar cell polarity pathway	2/65	47/18805	0.0425531914893617	12.3109656301146	4.57248566103343	0.0115060572444815	0.11310565980619	0.0903081447497374	WNT5A/CTHRC1	2	PT
GO:0042476	odontogenesis	3/65	136/18805	0.0220588235294118	6.38178733031674	3.70964596894517	0.0116598325565791	0.113515196764773	0.0906351356624775	COL1A2/INHBA/APCDD1	3	PT
GO:0045931	positive regulation of mitotic cell cycle	3/65	136/18805	0.0220588235294118	6.38178733031674	3.70964596894517	0.0116598325565791	0.113515196764773	0.0906351356624775	CCND2/SPHK1/SMOC2	3	PT
GO:0008544	epidermis development	5/65	395/18805	0.0126582278481013	3.66212268743914	3.14917450256695	0.0117510405795482	0.113855775950168	0.0909070678931556	INHBA/APCDD1/WNT5A/TCHH/FABP5	5	PT
GO:0090257	regulation of muscle system process	4/65	256/18805	0.015625	4.52043269230769	3.34004858154837	0.011871310140246	0.114473347780944	0.0914001622827962	CALM2/RGS4/SPHK1/FOXP1	4	PT
GO:0008038	neuron recognition	2/65	48/18805	0.0416666666666667	12.0544871794872	4.51621424361304	0.011979796503228	0.114971980658942	0.0917982909900633	CXCR4/NEXN	2	PT
GO:0010001	glial cell differentiation	4/65	259/18805	0.0154440154440154	4.46807246807247	3.30986228640569	0.0123462445076754	0.117800653887632	0.094056818386694	CXCR4/GPM6B/PLPP3/CNTN1	4	PT
GO:0006509	membrane protein ectodomain proteolysis	2/65	49/18805	0.0408163265306122	11.8084772370487	4.46158782686038	0.0124619902961204	0.117800653887632	0.094056818386694	TIMP3/BACE1	2	PT
GO:0014003	oligodendrocyte development	2/65	49/18805	0.0408163265306122	11.8084772370487	4.46158782686038	0.0124619902961204	0.117800653887632	0.094056818386694	GPM6B/CNTN1	2	PT
GO:0005996	monosaccharide metabolic process	4/65	260/18805	0.0153846153846154	4.4508875739645	3.29990222564447	0.0125072299189338	0.117800653887632	0.094056818386694	C1QTNF3/FABP5/NNMT/TFF3	4	PT
GO:0010959	regulation of metal ion transport	5/65	403/18805	0.0124069478908189	3.58942546287459	3.09471336485673	0.0127273450449038	0.119318859795973	0.0952690155408004	CXCR4/CALM2/GRP/RGS4/CNTN1	5	PT
GO:0006693	prostaglandin metabolic process	2/65	50/18805	0.04	11.5723076923077	4.40852459865733	0.0129525763974085	0.119766973537681	0.0956268077213141	CTHRC1/FABP5	2	PT
GO:0043114	regulation of vascular permeability	2/65	50/18805	0.04	11.5723076923077	4.40852459865733	0.0129525763974085	0.119766973537681	0.0956268077213141	FERMT2/AKAP12	2	PT
GO:0046686	response to cadmium ion	2/65	50/18805	0.04	11.5723076923077	4.40852459865733	0.0129525763974085	0.119766973537681	0.0956268077213141	SOD2/MT1X	2	PT
GO:0006692	prostanoid metabolic process	2/65	51/18805	0.0392156862745098	11.3453996983409	4.35694836407927	0.0134514928988734	0.123254629503252	0.0984114936540584	CTHRC1/FABP5	2	PT
GO:0051496	positive regulation of stress fiber assembly	2/65	51/18805	0.0392156862745098	11.3453996983409	4.35694836407927	0.0134514928988734	0.123254629503252	0.0984114936540584	PFN2/FERMT2	2	PT
GO:0007586	digestion	3/65	144/18805	0.0208333333333333	6.02724358974359	3.56648765361931	0.0135910414328878	0.123972337394584	0.0989845407345453	TFF1/TYMP/TFF3	3	PT
GO:0006636	unsaturated fatty acid biosynthetic process	2/65	52/18805	0.0384615384615385	11.1272189349112	4.30678805813063	0.0139586782084318	0.125787546571543	0.100433877340554	CTHRC1/FABP5	2	PT
GO:0046466	membrane lipid catabolic process	2/65	52/18805	0.0384615384615385	11.1272189349112	4.30678805813063	0.0139586782084318	0.125787546571543	0.100433877340554	PLPP3/SPHK1	2	PT
GO:0030900	forebrain development	5/65	413/18805	0.0121065375302663	3.50251443471782	3.02854578900501	0.0140235762580679	0.125787546571543	0.100433877340554	CXCR4/INHBA/WNT5A/TMEM14B/FOXP1	5	PT
GO:0046887	positive regulation of hormone secretion	3/65	146/18805	0.0205479452054795	5.94467860906217	3.53237921548098	0.0141006286774026	0.125787546571543	0.100433877340554	INHBA/C1QTNF3/GRP	3	PT
GO:0050921	positive regulation of chemotaxis	3/65	146/18805	0.0205479452054795	5.94467860906217	3.53237921548098	0.0141006286774026	0.125787546571543	0.100433877340554	CXCR4/WNT5A/SMOC2	3	PT
GO:0010043	response to zinc ion	2/65	53/18805	0.0377358490566038	10.9172714078374	4.25797730920889	0.0144740710487446	0.126883090362372	0.101308603922861	SOD2/MT1X	2	PT
GO:0044331	cell-cell adhesion mediated by cadherin	2/65	53/18805	0.0377358490566038	10.9172714078374	4.25797730920889	0.0144740710487446	0.126883090362372	0.101308603922861	CDH11/WNT5A	2	PT
GO:0090102	cochlea development	2/65	53/18805	0.0377358490566038	10.9172714078374	4.25797730920889	0.0144740710487446	0.126883090362372	0.101308603922861	WNT5A/CTHRC1	2	PT
GO:0097720	calcineurin-mediated signaling	2/65	53/18805	0.0377358490566038	10.9172714078374	4.25797730920889	0.0144740710487446	0.126883090362372	0.101308603922861	CALM2/FHL2	2	PT
GO:0016331	morphogenesis of embryonic epithelium	3/65	149/18805	0.0201342281879195	5.82498709344347	3.4823869762616	0.0148852274424512	0.129924937805878	0.103737338255921	WNT5A/CTHRC1/TGFB1I1	3	PT
GO:0048146	positive regulation of fibroblast proliferation	2/65	54/18805	0.037037037037037	10.7150997150997	4.21045404716823	0.0149976104558315	0.130344039369351	0.10407196593701	WNT5A/SPHK1	2	PT
GO:0006111	regulation of gluconeogenesis	2/65	55/18805	0.0363636363636364	10.5202797202797	4.16416015069374	0.0155292357776917	0.133815755105641	0.106843924544387	C1QTNF3/NNMT	2	PT
GO:0045778	positive regulation of ossification	2/65	55/18805	0.0363636363636364	10.5202797202797	4.16416015069374	0.0155292357776917	0.133815755105641	0.106843924544387	WNT5A/GPM6B	2	PT
GO:0001738	morphogenesis of a polarized epithelium	2/65	56/18805	0.0357142857142857	10.3324175824176	4.11904112940734	0.0160688866729293	0.136148516789463	0.10870649605646	WNT5A/CTHRC1	2	PT
GO:0010761	fibroblast migration	2/65	56/18805	0.0357142857142857	10.3324175824176	4.11904112940734	0.0160688866729293	0.136148516789463	0.10870649605646	ACTA2/AKAP12	2	PT
GO:0085029	extracellular matrix assembly	2/65	56/18805	0.0357142857142857	10.3324175824176	4.11904112940734	0.0160688866729293	0.136148516789463	0.10870649605646	COL1A2/GPM6B	2	PT
GO:2000648	positive regulation of stem cell proliferation	2/65	56/18805	0.0357142857142857	10.3324175824176	4.11904112940734	0.0160688866729293	0.136148516789463	0.10870649605646	WNT5A/FERMT2	2	PT
GO:0042692	muscle cell differentiation	5/65	429/18805	0.0116550116550117	3.37188452573068	2.9268044255812	0.0162785778631978	0.137350500720731	0.109666208762596	SOD2/KRT19/RGS4/FHL2/FOXP1	5	PT
GO:0046148	pigment biosynthetic process	2/65	57/18805	0.0350877192982456	10.1511470985155	4.07504583673199	0.0166165031093849	0.139043052878118	0.111017611030949	WNT5A/TMEM14B	2	PT
GO:0050982	detection of mechanical stimulus	2/65	57/18805	0.0350877192982456	10.1511470985155	4.07504583673199	0.0166165031093849	0.139043052878118	0.111017611030949	CXCR4/BACE1	2	PT
GO:0072132	mesenchyme morphogenesis	2/65	58/18805	0.0344827586206897	9.97612732095491	4.0321262100558	0.0171720253627728	0.142513735080389	0.113788744422861	ACTA2/WNT5A	2	PT
GO:0099172	presynapse organization	2/65	58/18805	0.0344827586206897	9.97612732095491	4.0321262100558	0.0171720253627728	0.142513735080389	0.113788744422861	WNT5A/PFN2	2	PT
GO:0008037	cell recognition	3/65	158/18805	0.0189873417721519	5.49318403115872	3.34022153055352	0.0173854042053662	0.143695687819863	0.114732463413287	CXCR4/VCAN/NEXN	3	PT
GO:0032413	negative regulation of ion transmembrane transporter activity	2/65	59/18805	0.0338983050847458	9.80704041720991	3.9902370351792	0.017735394015323	0.144815213229956	0.115626337892768	CALM2/GRP	2	PT
GO:0034332	adherens junction organization	2/65	59/18805	0.0338983050847458	9.80704041720991	3.9902370351792	0.017735394015323	0.144815213229956	0.115626337892768	CDH11/FERMT2	2	PT
GO:0060986	endocrine hormone secretion	2/65	59/18805	0.0338983050847458	9.80704041720991	3.9902370351792	0.017735394015323	0.144815213229956	0.115626337892768	INHBA/C1QTNF3	2	PT
GO:0009116	nucleoside metabolic process	2/65	60/18805	0.0333333333333333	9.64358974358974	3.94933573240654	0.0183065499544292	0.147692285488921	0.117923509037548	NNMT/TYMP	2	PT
GO:0010718	positive regulation of epithelial to mesenchymal transition	2/65	60/18805	0.0333333333333333	9.64358974358974	3.94933573240654	0.0183065499544292	0.147692285488921	0.117923509037548	FERMT2/TGFB1I1	2	PT
GO:0051480	regulation of cytosolic calcium ion concentration	2/65	60/18805	0.0333333333333333	9.64358974358974	3.94933573240654	0.0183065499544292	0.147692285488921	0.117923509037548	WNT5A/CALB2	2	PT
GO:0043542	endothelial cell migration	4/65	293/18805	0.0136518771331058	3.94959306904699	2.99685858306358	0.0185950342532131	0.149424382391891	0.11930648543415	WNT5A/PLPP3/SMOC2/FOXP1	4	PT
GO:0001961	positive regulation of cytokine-mediated signaling pathway	2/65	61/18805	0.0327868852459016	9.48549810844893	3.90938216196903	0.0188854343713023	0.149972567066224	0.119744178304728	CXCR4/WNT5A	2	PT
GO:0032233	positive regulation of actin filament bundle assembly	2/65	61/18805	0.0327868852459016	9.48549810844893	3.90938216196903	0.0188854343713023	0.149972567066224	0.119744178304728	PFN2/FERMT2	2	PT
GO:0046456	icosanoid biosynthetic process	2/65	61/18805	0.0327868852459016	9.48549810844893	3.90938216196903	0.0188854343713023	0.149972567066224	0.119744178304728	CTHRC1/FABP5	2	PT
GO:0070372	regulation of ERK1 and ERK2 cascade	4/65	296/18805	0.0135135135135135	3.90956340956341	2.97152378303762	0.0192253063836255	0.1520751774486	0.121422987686056	ACTA2/INHBA/FERMT2/AKAP12	4	PT
GO:0051785	positive regulation of nuclear division	2/65	62/18805	0.032258064516129	9.33250620347395	3.87033844674649	0.0194719887596292	0.152326031860335	0.12162328001948	WNT5A/SPHK1	2	PT
GO:1900024	regulation of substrate adhesion-dependent cell spreading	2/65	62/18805	0.032258064516129	9.33250620347395	3.87033844674649	0.0194719887596292	0.152326031860335	0.12162328001948	FERMT2/POSTN	2	PT
GO:0044344	cellular response to fibroblast growth factor stimulus	3/65	165/18805	0.0181818181818182	5.26013986013986	3.23697899767123	0.0194826875317664	0.152326031860335	0.12162328001948	WNT5A/SMOC2/POSTN	3	PT
GO:0008347	glial cell migration	2/65	63/18805	0.0317460317460317	9.18437118437118	3.8321688104985	0.020066154914237	0.154226408593984	0.123140617855937	VCAN/APCDD1	2	PT
GO:0043030	regulation of macrophage activation	2/65	63/18805	0.0317460317460317	9.18437118437118	3.8321688104985	0.020066154914237	0.154226408593984	0.123140617855937	WNT5A/SPHK1	2	PT
GO:0051893	regulation of focal adhesion assembly	2/65	63/18805	0.0317460317460317	9.18437118437118	3.8321688104985	0.020066154914237	0.154226408593984	0.123140617855937	GPM6B/FERMT2	2	PT
GO:0090109	regulation of cell-substrate junction assembly	2/65	63/18805	0.0317460317460317	9.18437118437118	3.8321688104985	0.020066154914237	0.154226408593984	0.123140617855937	GPM6B/FERMT2	2	PT
GO:0051147	regulation of muscle cell differentiation	3/65	167/18805	0.0179640718562874	5.19714417319208	3.2085549081704	0.0201065540092897	0.154226408593984	0.123140617855937	SOD2/RGS4/FOXP1	3	PT
GO:0098754	detoxification	3/65	168/18805	0.0178571428571429	5.16620879120879	3.19451311573846	0.0204226008758535	0.156059497258881	0.124604230170054	SOD2/GPX8/MT1X	3	PT
GO:0006767	water-soluble vitamin metabolic process	2/65	64/18805	0.03125	9.04086538461539	3.79483943002529	0.0206678749297627	0.156138727612345	0.124667490896718	ALDH1L2/NNMT	2	PT
GO:0033619	membrane protein proteolysis	2/65	64/18805	0.03125	9.04086538461539	3.79483943002529	0.0206678749297627	0.156138727612345	0.124667490896718	TIMP3/BACE1	2	PT
GO:0007156	homophilic cell adhesion via plasma membrane adhesion molecules	3/65	169/18805	0.0177514792899408	5.13563950842057	3.18058263337306	0.0207413914704794	0.156138727612345	0.124667490896718	CDH11/PCDH7/NEXN	3	PT
GO:1990138	neuron projection extension	3/65	169/18805	0.0177514792899408	5.13563950842057	3.18058263337306	0.0207413914704794	0.156138727612345	0.124667490896718	CXCR4/WNT5A/POSTN	3	PT
GO:0007409	axonogenesis	5/65	459/18805	0.0108932461873638	3.1514999162058	2.74836	0.0211363643431342	0.158522732573507	0.12657097711912	CDH11/WNT5A/ETV1/NEXN/CNTN1	5	PT
GO:0002011	morphogenesis of an epithelial sheet	2/65	65/18805	0.0307692307692308	8.90177514792899	3.75831829986206	0.0212770911993282	0.158989334607526	0.126943531101837	WNT5A/FERMT2	2	PT
GO:1905330	regulation of morphogenesis of an epithelium	2/65	66/18805	0.0303030303030303	8.76689976689977	3.72257510826919	0.0218937464132204	0.162995722377836	0.130142393539886	WNT5A/FOXP1	2	PT
GO:0071774	response to fibroblast growth factor	3/65	173/18805	0.0173410404624277	5.01689639839929	3.12594225345514	0.0220440062222197	0.163513232967014	0.130555594977172	WNT5A/SMOC2/POSTN	3	PT
GO:0048660	regulation of smooth muscle cell proliferation	3/65	174/18805	0.0172413793103448	4.98806366047745	3.11254493365189	0.0223765257967379	0.164442923359726	0.131297897481762	TNFAIP3/SOD2/FOXP1	3	PT
GO:0015909	long-chain fatty acid transport	2/65	67/18805	0.0298507462686567	8.63605051664753	3.68758112341993	0.0225177835575775	0.164442923359726	0.131297897481762	FABP4/FABP5	2	PT
GO:0070301	cellular response to hydrogen peroxide	2/65	67/18805	0.0298507462686567	8.63605051664753	3.68758112341993	0.0225177835575775	0.164442923359726	0.131297897481762	TNFAIP3/SPHK1	2	PT
GO:0071300	cellular response to retinoic acid	2/65	67/18805	0.0298507462686567	8.63605051664753	3.68758112341993	0.0225177835575775	0.164442923359726	0.131297897481762	WNT5A/NDUFA13	2	PT
GO:0051146	striated muscle cell differentiation	4/65	311/18805	0.0128617363344051	3.72099925797675	2.84964130721719	0.0225753741698785	0.164442923359726	0.131297897481762	KRT19/RGS4/FHL2/FOXP1	4	PT
GO:2000045	regulation of G1/S transition of mitotic cell cycle	3/65	176/18805	0.0170454545454545	4.93138111888112	3.0860553878455	0.0230498063769695	0.165643181886876	0.132256232555291	CCND2/INHBA/TMEM14B	3	PT
GO:0032715	negative regulation of interleukin-6 production	2/65	68/18805	0.0294117647058824	8.50904977375566	3.65330908880851	0.0231491459130795	0.165643181886876	0.132256232555291	TNFAIP3/C1QTNF3	2	PT
GO:0055021	regulation of cardiac muscle tissue growth	2/65	68/18805	0.0294117647058824	8.50904977375566	3.65330908880851	0.0231491459130795	0.165643181886876	0.132256232555291	RGS4/FOXP1	2	PT
GO:0060760	positive regulation of response to cytokine stimulus	2/65	68/18805	0.0294117647058824	8.50904977375566	3.65330908880851	0.0231491459130795	0.165643181886876	0.132256232555291	CXCR4/WNT5A	2	PT
GO:0150116	regulation of cell-substrate junction organization	2/65	68/18805	0.0294117647058824	8.50904977375566	3.65330908880851	0.0231491459130795	0.165643181886876	0.132256232555291	GPM6B/FERMT2	2	PT
GO:0032635	interleukin-6 production	3/65	177/18805	0.0169491525423729	4.90352020860495	3.07296	0.0233905676250486	0.166196138388503	0.132697735446259	TNFAIP3/C1QTNF3/WNT5A	3	PT
GO:0032675	regulation of interleukin-6 production	3/65	177/18805	0.0169491525423729	4.90352020860495	3.07296	0.0233905676250486	0.166196138388503	0.132697735446259	TNFAIP3/C1QTNF3/WNT5A	3	PT
GO:0043269	regulation of monoatomic ion transport	5/65	472/18805	0.0105932203389831	3.0647001303781	2.67552012229881	0.0235078127942427	0.166445178001194	0.132896578770544	CXCR4/CALM2/GRP/RGS4/CNTN1	5	PT
GO:0048659	smooth muscle cell proliferation	3/65	178/18805	0.0168539325842697	4.87597234226448	3.05996331281889	0.023734076162039	0.166679060670003	0.133083320176283	TNFAIP3/SOD2/FOXP1	3	PT
GO:0001666	response to hypoxia	4/65	316/18805	0.0126582278481013	3.66212268743914	2.81068323370206	0.0237665856754348	0.166679060670003	0.133083320176283	CXCR4/SOD2/INHBA/POSTN	4	PT
GO:0035567	non-canonical Wnt signaling pathway	2/65	69/18805	0.0289855072463768	8.38573021181717	3.61973312700811	0.0237877770536449	0.166679060670003	0.133083320176283	WNT5A/CTHRC1	2	PT
GO:0010803	regulation of tumor necrosis factor-mediated signaling pathway	2/65	70/18805	0.0285714285714286	8.26593406593406	3.58682865100178	0.0244336208451321	0.169901665302138	0.135656378377692	TNFAIP3/SPHK1	2	PT
GO:0048662	negative regulation of smooth muscle cell proliferation	2/65	70/18805	0.0285714285714286	8.26593406593406	3.58682865100178	0.0244336208451321	0.169901665302138	0.135656378377692	TNFAIP3/SOD2	2	PT
GO:0070371	ERK1 and ERK2 cascade	4/65	319/18805	0.0125391849529781	3.62768266216542	2.78768558272989	0.0244994006262836	0.169901665302138	0.135656378377692	ACTA2/INHBA/FERMT2/AKAP12	4	PT
GO:0030178	negative regulation of Wnt signaling pathway	3/65	181/18805	0.0165745856353591	4.79515512112197	3.02154692974244	0.0247810835411358	0.171268580787713	0.136747779124069	APCDD1/WNT5A/CTHRC1	3	PT
GO:0010611	regulation of cardiac muscle hypertrophy	2/65	71/18805	0.028169014084507	8.14951245937161	3.55457228239141	0.0250866214440463	0.172204774319301	0.137495273998412	RGS4/FOXP1	2	PT
GO:0018107	peptidyl-threonine phosphorylation	2/65	71/18805	0.028169014084507	8.14951245937161	3.55457228239141	0.0250866214440463	0.172204774319301	0.137495273998412	CALM2/SPHK1	2	PT
GO:0051148	negative regulation of muscle cell differentiation	2/65	72/18805	0.0277777777777778	8.03632478632479	3.52294177586274	0.0257467232962518	0.175677618560722	0.140268133650042	RGS4/FOXP1	2	PT
GO:0006109	regulation of carbohydrate metabolic process	3/65	184/18805	0.016304347826087	4.71697324414716	2.98396587844256	0.0258528051017754	0.175677618560722	0.140268133650042	C1QTNF3/NNMT/TFF3	3	PT
GO:0006575	modified amino acid metabolic process	3/65	184/18805	0.016304347826087	4.71697324414716	2.98396587844256	0.0258528051017754	0.175677618560722	0.140268133650042	SOD2/ALDH1L2/DIO2	3	PT
GO:0032722	positive regulation of chemokine production	2/65	73/18805	0.0273972602739726	7.92623814541623	3.49191594934815	0.0264138711356891	0.178889929932343	0.142832973294907	WNT5A/POSTN	2	PT
GO:0048638	regulation of developmental growth	4/65	327/18805	0.0122324159021407	3.53893201599624	2.72768661974767	0.0265203539784257	0.179012389354374	0.142930749862673	CXCR4/WNT5A/RGS4/FOXP1	4	PT
GO:0007219	Notch signaling pathway	3/65	187/18805	0.0160427807486631	4.64129987659399	2.94718734029618	0.0269492231091162	0.180438224393989	0.144069194369937	KRT19/POSTN/CNTN1	3	PT
GO:0090092	regulation of transmembrane receptor protein serine/threonine kinase signaling pathway	4/65	329/18805	0.0121580547112462	3.5174187514613	2.71297905746549	0.0270408477129808	0.180438224393989	0.144069194369937	INHBA/CILP/WNT5A/TGFB1I1	4	PT
GO:0014743	regulation of muscle hypertrophy	2/65	74/18805	0.027027027027027	7.81912681912682	3.46147461938591	0.0270880099830976	0.180438224393989	0.144069194369937	RGS4/FOXP1	2	PT
GO:0060420	regulation of heart growth	2/65	74/18805	0.027027027027027	7.81912681912682	3.46147461938591	0.0270880099830976	0.180438224393989	0.144069194369937	RGS4/FOXP1	2	PT
GO:0036293	response to decreased oxygen levels	4/65	330/18805	0.0121212121212121	3.50675990675991	2.70566792150731	0.027303392176896	0.181276620190867	0.144738603567601	CXCR4/SOD2/INHBA/POSTN	4	PT
GO:0021879	forebrain neuron differentiation	2/65	75/18805	0.0266666666666667	7.7148717948718	3.43159854122469	0.0277690851447432	0.18299349200748	0.146109423637942	INHBA/WNT5A	2	PT
GO:0045109	intermediate filament organization	2/65	75/18805	0.0266666666666667	7.7148717948718	3.43159854122469	0.0277690851447432	0.18299349200748	0.146109423637942	KRT19/TCHH	2	PT
GO:0051090	regulation of DNA-binding transcription factor activity	4/65	332/18805	0.0120481927710843	3.48563484708063	2.69112990212192	0.0278330842164464	0.18299349200748	0.146109423637942	TNFAIP3/WNT5A/PLPP3/SPHK1	4	PT
GO:0001707	mesoderm formation	2/65	76/18805	0.0263157894736842	7.61336032388664	3.40226935326669	0.0284570422111513	0.185888743476069	0.148421109800775	INHBA/WNT5A	2	PT
GO:0061077	chaperone-mediated protein folding	2/65	76/18805	0.0263157894736842	7.61336032388664	3.40226935326669	0.0284570422111513	0.185888743476069	0.148421109800775	FKBP2/HSPE1	2	PT
GO:0001837	epithelial to mesenchymal transition	3/65	192/18805	0.015625	4.52043269230769	2.88758965580371	0.0288313939507787	0.187728529743817	0.149890069752568	WNT5A/FERMT2/TGFB1I1	3	PT
GO:0045669	positive regulation of osteoblast differentiation	2/65	77/18805	0.025974025974026	7.51448551448552	3.3734695254828	0.0291518270558445	0.188811750236832	0.150754956914242	CTHRC1/FERMT2	2	PT
GO:0060562	epithelial tube morphogenesis	4/65	337/18805	0.0118694362017804	3.43391919653047	2.65526688869469	0.0291842359625325	0.188811750236832	0.150754956914242	CXCR4/WNT5A/CTHRC1/FOXP1	4	PT
GO:0048332	mesoderm morphogenesis	2/65	78/18805	0.0256410256410256	7.4181459566075	3.34518231146791	0.0298533858340863	0.192525816286703	0.153720417838272	INHBA/WNT5A	2	PT
GO:0051091	positive regulation of DNA-binding transcription factor activity	3/65	195/18805	0.0153846153846154	4.4508875739645	2.85280400884862	0.0299935221235762	0.192815499365847	0.153951712554095	WNT5A/PLPP3/SPHK1	3	PT
GO:0050954	sensory perception of mechanical stimulus	3/65	196/18805	0.0153061224489796	4.42817896389325	2.84136488999902	0.0303863594287	0.194037074797763	0.154927067908701	CXCR4/GJB2/BACE1	3	PT
GO:0060485	mesenchyme development	4/65	342/18805	0.0116959064327485	3.38371569950517	2.62007293713226	0.0305739871786086	0.194037074797763	0.154927067908701	ACTA2/WNT5A/FERMT2/TGFB1I1	4	PT
GO:0045787	positive regulation of cell cycle	4/65	344/18805	0.0116279069767442	3.36404293381038	2.60617740977943	0.0311407315984459	0.194037074797763	0.154927067908701	CCND2/WNT5A/SPHK1/SMOC2	4	PT
GO:0002028	regulation of sodium ion transport	2/65	80/18805	0.025	7.23269230769231	3.29008239268805	0.0312766112134663	0.194037074797763	0.154927067908701	GRP/CNTN1	2	PT
GO:0002260	lymphocyte homeostasis	2/65	81/18805	0.0246913580246914	7.14339981006648	3.26323972689109	0.0319981715225935	0.194037074797763	0.154927067908701	TNFAIP3/TSC22D3	2	PT
GO:0018210	peptidyl-threonine modification	2/65	81/18805	0.0246913580246914	7.14339981006648	3.26323972689109	0.0319981715225935	0.194037074797763	0.154927067908701	CALM2/SPHK1	2	PT
GO:0032410	negative regulation of transporter activity	2/65	81/18805	0.0246913580246914	7.14339981006648	3.26323972689109	0.0319981715225935	0.194037074797763	0.154927067908701	CALM2/GRP	2	PT
GO:0042440	pigment metabolic process	2/65	81/18805	0.0246913580246914	7.14339981006648	3.26323972689109	0.0319981715225935	0.194037074797763	0.154927067908701	WNT5A/TMEM14B	2	PT
GO:0032956	regulation of actin cytoskeleton organization	4/65	348/18805	0.0114942528735632	3.32537577365164	2.57869047284677	0.0322928611899788	0.194037074797763	0.154927067908701	GPM6B/RGS4/PFN2/FERMT2	4	PT
GO:0007369	gastrulation	3/65	202/18805	0.0148514851485149	4.2966488956588	2.77430301439807	0.0328005896063655	0.194037074797763	0.154927067908701	INHBA/WNT5A/PLPP3	3	PT
GO:0060390	regulation of SMAD protein signal transduction	2/65	83/18805	0.0240963855421687	6.97126969416126	3.21089880638116	0.0334609237272838	0.194037074797763	0.154927067908701	INHBA/CILP	2	PT
GO:2000027	regulation of animal organ morphogenesis	2/65	83/18805	0.0240963855421687	6.97126969416126	3.21089880638116	0.0334609237272838	0.194037074797763	0.154927067908701	APCDD1/WNT5A	2	PT
GO:0006924	activation-induced cell death of T cells	1/65	10/18805	0.1	28.9307692307692	5.20305884767849	0.0340405800779808	0.194037074797763	0.154927067908701	TSC22D3	1	PT
GO:0010496	intercellular transport	1/65	10/18805	0.1	28.9307692307692	5.20305884767849	0.0340405800779808	0.194037074797763	0.154927067908701	GJB2	1	PT
GO:0019371	cyclooxygenase pathway	1/65	10/18805	0.1	28.9307692307692	5.20305884767849	0.0340405800779808	0.194037074797763	0.154927067908701	CTHRC1	1	PT
GO:0034356	NAD biosynthesis via nicotinamide riboside salvage pathway	1/65	10/18805	0.1	28.9307692307692	5.20305884767849	0.0340405800779808	0.194037074797763	0.154927067908701	NNMT	1	PT
GO:0035356	intracellular triglyceride homeostasis	1/65	10/18805	0.1	28.9307692307692	5.20305884767849	0.0340405800779808	0.194037074797763	0.154927067908701	C1QTNF3	1	PT
GO:0045136	development of secondary sexual characteristics	1/65	10/18805	0.1	28.9307692307692	5.20305884767849	0.0340405800779808	0.194037074797763	0.154927067908701	WNT5A	1	PT
GO:0045743	positive regulation of fibroblast growth factor receptor signaling pathway	1/65	10/18805	0.1	28.9307692307692	5.20305884767849	0.0340405800779808	0.194037074797763	0.154927067908701	SMOC2	1	PT
GO:0048340	paraxial mesoderm morphogenesis	1/65	10/18805	0.1	28.9307692307692	5.20305884767849	0.0340405800779808	0.194037074797763	0.154927067908701	WNT5A	1	PT
GO:0048843	negative regulation of axon extension involved in axon guidance	1/65	10/18805	0.1	28.9307692307692	5.20305884767849	0.0340405800779808	0.194037074797763	0.154927067908701	WNT5A	1	PT
GO:0051964	negative regulation of synapse assembly	1/65	10/18805	0.1	28.9307692307692	5.20305884767849	0.0340405800779808	0.194037074797763	0.154927067908701	WNT5A	1	PT
GO:0055015	ventricular cardiac muscle cell development	1/65	10/18805	0.1	28.9307692307692	5.20305884767849	0.0340405800779808	0.194037074797763	0.154927067908701	FHL2	1	PT
GO:0060068	vagina development	1/65	10/18805	0.1	28.9307692307692	5.20305884767849	0.0340405800779808	0.194037074797763	0.154927067908701	WNT5A	1	PT
GO:0070432	regulation of nucleotide-binding oligomerization domain containing 2 signaling pathway	1/65	10/18805	0.1	28.9307692307692	5.20305884767849	0.0340405800779808	0.194037074797763	0.154927067908701	TNFAIP3	1	PT
GO:0071287	cellular response to manganese ion	1/65	10/18805	0.1	28.9307692307692	5.20305884767849	0.0340405800779808	0.194037074797763	0.154927067908701	BACE1	1	PT
GO:0071372	cellular response to follicle-stimulating hormone stimulus	1/65	10/18805	0.1	28.9307692307692	5.20305884767849	0.0340405800779808	0.194037074797763	0.154927067908701	INHBA	1	PT
GO:0098917	retrograde trans-synaptic signaling	1/65	10/18805	0.1	28.9307692307692	5.20305884767849	0.0340405800779808	0.194037074797763	0.154927067908701	FABP5	1	PT
GO:0099566	regulation of postsynaptic cytosolic calcium ion concentration	1/65	10/18805	0.1	28.9307692307692	5.20305884767849	0.0340405800779808	0.194037074797763	0.154927067908701	WNT5A	1	PT
GO:1900748	positive regulation of vascular endothelial growth factor signaling pathway	1/65	10/18805	0.1	28.9307692307692	5.20305884767849	0.0340405800779808	0.194037074797763	0.154927067908701	SMOC2	1	PT
GO:1901401	regulation of tetrapyrrole metabolic process	1/65	10/18805	0.1	28.9307692307692	5.20305884767849	0.0340405800779808	0.194037074797763	0.154927067908701	TMEM14B	1	PT
GO:1902460	regulation of mesenchymal stem cell proliferation	1/65	10/18805	0.1	28.9307692307692	5.20305884767849	0.0340405800779808	0.194037074797763	0.154927067908701	FERMT2	1	PT
GO:1904383	response to sodium phosphate	1/65	10/18805	0.1	28.9307692307692	5.20305884767849	0.0340405800779808	0.194037074797763	0.154927067908701	GRP	1	PT
GO:1904683	regulation of metalloendopeptidase activity	1/65	10/18805	0.1	28.9307692307692	5.20305884767849	0.0340405800779808	0.194037074797763	0.154927067908701	TIMP3	1	PT
GO:1905150	regulation of voltage-gated sodium channel activity	1/65	10/18805	0.1	28.9307692307692	5.20305884767849	0.0340405800779808	0.194037074797763	0.154927067908701	GRP	1	PT
GO:2000650	negative regulation of sodium ion transmembrane transporter activity	1/65	10/18805	0.1	28.9307692307692	5.20305884767849	0.0340405800779808	0.194037074797763	0.154927067908701	GRP	1	PT
GO:2000822	regulation of behavioral fear response	1/65	10/18805	0.1	28.9307692307692	5.20305884767849	0.0340405800779808	0.194037074797763	0.154927067908701	GRP	1	PT
GO:2001241	positive regulation of extrinsic apoptotic signaling pathway in absence of ligand	1/65	10/18805	0.1	28.9307692307692	5.20305884767849	0.0340405800779808	0.194037074797763	0.154927067908701	INHBA	1	PT
GO:0048839	inner ear development	3/65	205/18805	0.0146341463414634	4.23377110694184	2.74174298595401	0.0340443795719262	0.194037074797763	0.154927067908701	WNT5A/CTHRC1/GJB2	3	PT
GO:1902806	regulation of cell cycle G1/S phase transition	3/65	205/18805	0.0146341463414634	4.23377110694184	2.74174298595401	0.0340443795719262	0.194037074797763	0.154927067908701	CCND2/INHBA/TMEM14B	3	PT
GO:0021872	forebrain generation of neurons	2/65	84/18805	0.0238095238095238	6.88827838827839	3.18537423000296	0.0342020109877346	0.194037074797763	0.154927067908701	INHBA/WNT5A	2	PT
GO:1901657	glycosyl compound metabolic process	2/65	85/18805	0.0235294117647059	6.80723981900452	3.16026359466034	0.0349495030528025	0.194037074797763	0.154927067908701	NNMT/TYMP	2	PT
GO:0070482	response to oxygen levels	4/65	358/18805	0.0111731843575419	3.23248818220885	2.5116829318554	0.0352822957774896	0.194037074797763	0.154927067908701	CXCR4/SOD2/INHBA/POSTN	4	PT
GO:0006936	muscle contraction	4/65	359/18805	0.011142061281337	3.22348403685451	2.50511198248729	0.0355898360703042	0.194037074797763	0.154927067908701	CXCR4/ACTA2/CALM2/SPHK1	4	PT
GO:0001843	neural tube closure	2/65	86/18805	0.0232558139534884	6.72808586762075	3.13555504653836	0.0357033482870362	0.194037074797763	0.154927067908701	WNT5A/CTHRC1	2	PT
GO:0045860	positive regulation of protein kinase activity	3/65	210/18805	0.0142857142857143	4.13296703296703	2.68883645305024	0.0361714578658519	0.194037074797763	0.154927067908701	CCND2/CALM2/WNT5A	3	PT
GO:0060606	tube closure	2/65	87/18805	0.0229885057471264	6.65075154730327	3.11123720633859	0.03646349532564	0.194037074797763	0.154927067908701	WNT5A/CTHRC1	2	PT
GO:1901379	regulation of potassium ion transmembrane transport	2/65	87/18805	0.0229885057471264	6.65075154730327	3.11123720633859	0.03646349532564	0.194037074797763	0.154927067908701	GRP/RGS4	2	PT
GO:0002158	osteoclast proliferation	1/65	11/18805	0.0909090909090909	26.3006993006993	4.94329197394587	0.0373812218601	0.194037074797763	0.154927067908701	TNFAIP3	1	PT
GO:0003139	secondary heart field specification	1/65	11/18805	0.0909090909090909	26.3006993006993	4.94329197394587	0.0373812218601	0.194037074797763	0.154927067908701	WNT5A	1	PT
GO:0019365	pyridine nucleotide salvage	1/65	11/18805	0.0909090909090909	26.3006993006993	4.94329197394587	0.0373812218601	0.194037074797763	0.154927067908701	NNMT	1	PT
GO:0021889	olfactory bulb interneuron differentiation	1/65	11/18805	0.0909090909090909	26.3006993006993	4.94329197394587	0.0373812218601	0.194037074797763	0.154927067908701	WNT5A	1	PT
GO:0033625	positive regulation of integrin activation	1/65	11/18805	0.0909090909090909	26.3006993006993	4.94329197394587	0.0373812218601	0.194037074797763	0.154927067908701	FERMT2	1	PT
GO:0034350	regulation of glial cell apoptotic process	1/65	11/18805	0.0909090909090909	26.3006993006993	4.94329197394587	0.0373812218601	0.194037074797763	0.154927067908701	AKAP12	1	PT
GO:0034355	NAD biosynthetic process via the salvage pathway	1/65	11/18805	0.0909090909090909	26.3006993006993	4.94329197394587	0.0373812218601	0.194037074797763	0.154927067908701	NNMT	1	PT
GO:0035871	protein K11-linked deubiquitination	1/65	11/18805	0.0909090909090909	26.3006993006993	4.94329197394587	0.0373812218601	0.194037074797763	0.154927067908701	TNFAIP3	1	PT
GO:0042118	endothelial cell activation	1/65	11/18805	0.0909090909090909	26.3006993006993	4.94329197394587	0.0373812218601	0.194037074797763	0.154927067908701	FOXP1	1	PT
GO:0046495	nicotinamide riboside metabolic process	1/65	11/18805	0.0909090909090909	26.3006993006993	4.94329197394587	0.0373812218601	0.194037074797763	0.154927067908701	NNMT	1	PT
GO:0060020	Bergmann glial cell differentiation	1/65	11/18805	0.0909090909090909	26.3006993006993	4.94329197394587	0.0373812218601	0.194037074797763	0.154927067908701	PLPP3	1	PT
GO:0060159	regulation of dopamine receptor signaling pathway	1/65	11/18805	0.0909090909090909	26.3006993006993	4.94329197394587	0.0373812218601	0.194037074797763	0.154927067908701	RGS4	1	PT
GO:0060601	lateral sprouting from an epithelium	1/65	11/18805	0.0909090909090909	26.3006993006993	4.94329197394587	0.0373812218601	0.194037074797763	0.154927067908701	WNT5A	1	PT
GO:0060900	embryonic camera-type eye formation	1/65	11/18805	0.0909090909090909	26.3006993006993	4.94329197394587	0.0373812218601	0.194037074797763	0.154927067908701	WNT5A	1	PT
GO:0061470	T follicular helper cell differentiation	1/65	11/18805	0.0909090909090909	26.3006993006993	4.94329197394587	0.0373812218601	0.194037074797763	0.154927067908701	FOXP1	1	PT
GO:0070637	pyridine nucleoside metabolic process	1/65	11/18805	0.0909090909090909	26.3006993006993	4.94329197394587	0.0373812218601	0.194037074797763	0.154927067908701	NNMT	1	PT
GO:0071481	cellular response to X-ray	1/65	11/18805	0.0909090909090909	26.3006993006993	4.94329197394587	0.0373812218601	0.194037074797763	0.154927067908701	CCND2	1	PT
GO:0090009	primitive streak formation	1/65	11/18805	0.0909090909090909	26.3006993006993	4.94329197394587	0.0373812218601	0.194037074797763	0.154927067908701	WNT5A	1	PT
GO:0097168	mesenchymal stem cell proliferation	1/65	11/18805	0.0909090909090909	26.3006993006993	4.94329197394587	0.0373812218601	0.194037074797763	0.154927067908701	FERMT2	1	PT
GO:0097278	complement-dependent cytotoxicity	1/65	11/18805	0.0909090909090909	26.3006993006993	4.94329197394587	0.0373812218601	0.194037074797763	0.154927067908701	CD59	1	PT
GO:1901844	regulation of cell communication by electrical coupling involved in cardiac conduction	1/65	11/18805	0.0909090909090909	26.3006993006993	4.94329197394587	0.0373812218601	0.194037074797763	0.154927067908701	CALM2	1	PT
GO:1903365	regulation of fear response	1/65	11/18805	0.0909090909090909	26.3006993006993	4.94329197394587	0.0373812218601	0.194037074797763	0.154927067908701	GRP	1	PT
GO:1903689	regulation of wound healing, spreading of epidermal cells	1/65	11/18805	0.0909090909090909	26.3006993006993	4.94329197394587	0.0373812218601	0.194037074797763	0.154927067908701	FERMT2	1	PT
GO:1904238	pericyte cell differentiation	1/65	11/18805	0.0909090909090909	26.3006993006993	4.94329197394587	0.0373812218601	0.194037074797763	0.154927067908701	ACTA2	1	PT
GO:1990034	calcium ion export across plasma membrane	1/65	11/18805	0.0909090909090909	26.3006993006993	4.94329197394587	0.0373812218601	0.194037074797763	0.154927067908701	CALM2	1	PT
GO:2000347	positive regulation of hepatocyte proliferation	1/65	11/18805	0.0909090909090909	26.3006993006993	4.94329197394587	0.0373812218601	0.194037074797763	0.154927067908701	TNFAIP3	1	PT
GO:0045732	positive regulation of protein catabolic process	3/65	214/18805	0.014018691588785	4.05571531272466	2.64767947073559	0.0379215960655934	0.194037074797763	0.154927067908701	TNFAIP3/WNT5A/NDUFA13	3	PT
GO:0006094	gluconeogenesis	2/65	89/18805	0.0224719101123595	6.50129645635264	3.06373036122411	0.0380024907028209	0.194037074797763	0.154927067908701	C1QTNF3/NNMT	2	PT
GO:0007626	locomotory behavior	3/65	215/18805	0.013953488372093	4.03685152057245	2.63754634848826	0.0383658369189297	0.194037074797763	0.154927067908701	CCND2/SOD2/CNTN1	3	PT
GO:0021953	central nervous system neuron differentiation	3/65	215/18805	0.013953488372093	4.03685152057245	2.63754634848826	0.0383658369189297	0.194037074797763	0.154927067908701	CDH11/INHBA/WNT5A	3	PT
GO:0031032	actomyosin structure organization	3/65	215/18805	0.013953488372093	4.03685152057245	2.63754634848826	0.0383658369189297	0.194037074797763	0.154927067908701	KRT19/PFN2/FERMT2	3	PT
GO:2000243	positive regulation of reproductive process	2/65	90/18805	0.0222222222222222	6.42905982905983	3.04052075962167	0.0387812376542509	0.194037074797763	0.154927067908701	INHBA/WNT5A	2	PT
GO:0050920	regulation of chemotaxis	3/65	217/18805	0.0138248847926267	3.99964551577455	2.61746254726371	0.039262342410916	0.194037074797763	0.154927067908701	CXCR4/WNT5A/SMOC2	3	PT
GO:0071900	regulation of protein serine/threonine kinase activity	3/65	217/18805	0.0138248847926267	3.99964551577455	2.61746254726371	0.039262342410916	0.194037074797763	0.154927067908701	CCND2/CALM2/WNT5A	3	PT
GO:0046849	bone remodeling	2/65	91/18805	0.021978021978022	6.35841081994928	3.01766063117251	0.0395660836333678	0.194037074797763	0.154927067908701	TNFAIP3/CTHRC1	2	PT
GO:0014020	primary neural tube formation	2/65	92/18805	0.0217391304347826	6.28929765886288	2.9951406341163	0.040356978610653	0.194037074797763	0.154927067908701	WNT5A/CTHRC1	2	PT
GO:0019319	hexose biosynthetic process	2/65	92/18805	0.0217391304347826	6.28929765886288	2.9951406341163	0.040356978610653	0.194037074797763	0.154927067908701	C1QTNF3/NNMT	2	PT
GO:0034340	response to type I interferon	2/65	92/18805	0.0217391304347826	6.28929765886288	2.9951406341163	0.040356978610653	0.194037074797763	0.154927067908701	WNT5A/CH25H	2	PT
GO:0055017	cardiac muscle tissue growth	2/65	92/18805	0.0217391304347826	6.28929765886288	2.9951406341163	0.040356978610653	0.194037074797763	0.154927067908701	RGS4/FOXP1	2	PT
GO:0060021	roof of mouth development	2/65	92/18805	0.0217391304347826	6.28929765886288	2.9951406341163	0.040356978610653	0.194037074797763	0.154927067908701	INHBA/WNT5A	2	PT
GO:0001553	luteinization	1/65	12/18805	0.0833333333333333	24.1089743589744	4.71596141518382	0.0407104876140159	0.194037074797763	0.154927067908701	INHBA	1	PT
GO:0007494	midgut development	1/65	12/18805	0.0833333333333333	24.1089743589744	4.71596141518382	0.0407104876140159	0.194037074797763	0.154927067908701	WNT5A	1	PT
GO:0009176	pyrimidine deoxyribonucleoside monophosphate metabolic process	1/65	12/18805	0.0833333333333333	24.1089743589744	4.71596141518382	0.0407104876140159	0.194037074797763	0.154927067908701	TYMP	1	PT
GO:0010269	response to selenium ion	1/65	12/18805	0.0833333333333333	24.1089743589744	4.71596141518382	0.0407104876140159	0.194037074797763	0.154927067908701	SOD2	1	PT
GO:0031392	regulation of prostaglandin biosynthetic process	1/65	12/18805	0.0833333333333333	24.1089743589744	4.71596141518382	0.0407104876140159	0.194037074797763	0.154927067908701	FABP5	1	PT
GO:0032276	regulation of gonadotropin secretion	1/65	12/18805	0.0833333333333333	24.1089743589744	4.71596141518382	0.0407104876140159	0.194037074797763	0.154927067908701	INHBA	1	PT
GO:0032908	regulation of transforming growth factor beta1 production	1/65	12/18805	0.0833333333333333	24.1089743589744	4.71596141518382	0.0407104876140159	0.194037074797763	0.154927067908701	LUM	1	PT
GO:0034135	regulation of toll-like receptor 2 signaling pathway	1/65	12/18805	0.0833333333333333	24.1089743589744	4.71596141518382	0.0407104876140159	0.194037074797763	0.154927067908701	TNFAIP3	1	PT
GO:0034139	regulation of toll-like receptor 3 signaling pathway	1/65	12/18805	0.0833333333333333	24.1089743589744	4.71596141518382	0.0407104876140159	0.194037074797763	0.154927067908701	TNFAIP3	1	PT
GO:0042117	monocyte activation	1/65	12/18805	0.0833333333333333	24.1089743589744	4.71596141518382	0.0407104876140159	0.194037074797763	0.154927067908701	FOXP1	1	PT
GO:0042487	regulation of odontogenesis of dentin-containing tooth	1/65	12/18805	0.0833333333333333	24.1089743589744	4.71596141518382	0.0407104876140159	0.194037074797763	0.154927067908701	APCDD1	1	PT
GO:0043589	skin morphogenesis	1/65	12/18805	0.0833333333333333	24.1089743589744	4.71596141518382	0.0407104876140159	0.194037074797763	0.154927067908701	COL1A2	1	PT
GO:0051280	negative regulation of release of sequestered calcium ion into cytosol	1/65	12/18805	0.0833333333333333	24.1089743589744	4.71596141518382	0.0407104876140159	0.194037074797763	0.154927067908701	CALM2	1	PT
GO:0051798	positive regulation of hair follicle development	1/65	12/18805	0.0833333333333333	24.1089743589744	4.71596141518382	0.0407104876140159	0.194037074797763	0.154927067908701	WNT5A	1	PT
GO:0061370	testosterone biosynthetic process	1/65	12/18805	0.0833333333333333	24.1089743589744	4.71596141518382	0.0407104876140159	0.194037074797763	0.154927067908701	INHBA	1	PT
GO:0071377	cellular response to glucagon stimulus	1/65	12/18805	0.0833333333333333	24.1089743589744	4.71596141518382	0.0407104876140159	0.194037074797763	0.154927067908701	GJB2	1	PT
GO:0090206	negative regulation of cholesterol metabolic process	1/65	12/18805	0.0833333333333333	24.1089743589744	4.71596141518382	0.0407104876140159	0.194037074797763	0.154927067908701	CH25H	1	PT
GO:0090677	reversible differentiation	1/65	12/18805	0.0833333333333333	24.1089743589744	4.71596141518382	0.0407104876140159	0.194037074797763	0.154927067908701	SOD2	1	PT
GO:2000009	negative regulation of protein localization to cell surface	1/65	12/18805	0.0833333333333333	24.1089743589744	4.71596141518382	0.0407104876140159	0.194037074797763	0.154927067908701	GPM6B	1	PT
GO:2000049	positive regulation of cell-cell adhesion mediated by cadherin	1/65	12/18805	0.0833333333333333	24.1089743589744	4.71596141518382	0.0407104876140159	0.194037074797763	0.154927067908701	WNT5A	1	PT
GO:2000343	positive regulation of chemokine (C-X-C motif) ligand 2 production	1/65	12/18805	0.0833333333333333	24.1089743589744	4.71596141518382	0.0407104876140159	0.194037074797763	0.154927067908701	POSTN	1	PT
GO:0042176	regulation of protein catabolic process	4/65	375/18805	0.0106666666666667	3.08594871794872	2.40299905413554	0.0407238305131108	0.194037074797763	0.154927067908701	TNFAIP3/WNT5A/NDUFA13/TIMP3	4	PT
GO:0002064	epithelial cell development	3/65	221/18805	0.0135746606334842	3.92725374173338	2.57800594520506	0.0410873477712327	0.195167663842284	0.155829776042494	CXCR4/ACTA2/WNT5A	3	PT
GO:0030901	midbrain development	2/65	93/18805	0.021505376344086	6.22167080231596	2.97295177626522	0.0411538728200766	0.195167663842284	0.155829776042494	CALM2/WNT5A	2	PT
GO:0045216	cell-cell junction organization	3/65	222/18805	0.0135135135135135	3.90956340956341	2.56828613080208	0.0415502427782088	0.196494156260242	0.1568889013727	CDH11/GJB2/FERMT2	3	PT
GO:0021954	central nervous system neuron development	2/65	94/18805	0.0212765957446809	6.15548281505728	2.95108539830291	0.0419567167579202	0.196494156260242	0.1568889013727	CDH11/WNT5A	2	PT
GO:0033273	response to vitamin	2/65	94/18805	0.0212765957446809	6.15548281505728	2.95108539830291	0.0419567167579202	0.196494156260242	0.1568889013727	SOD2/POSTN	2	PT
GO:0046364	monosaccharide biosynthetic process	2/65	94/18805	0.0212765957446809	6.15548281505728	2.95108539830291	0.0419567167579202	0.196494156260242	0.1568889013727	C1QTNF3/NNMT	2	PT
GO:0050886	endocrine process	2/65	94/18805	0.0212765957446809	6.15548281505728	2.95108539830291	0.0419567167579202	0.196494156260242	0.1568889013727	INHBA/C1QTNF3	2	PT
GO:0033674	positive regulation of kinase activity	3/65	223/18805	0.0134529147982063	3.89203173508106	2.55862279208837	0.042015787486758	0.196494156260242	0.1568889013727	CCND2/CALM2/WNT5A	3	PT
GO:0010810	regulation of cell-substrate adhesion	3/65	224/18805	0.0133928571428571	3.87465659340659	2.54901531669201	0.0424839778935011	0.197688561725814	0.157842563124548	GPM6B/FERMT2/POSTN	3	PT
GO:0051492	regulation of stress fiber assembly	2/65	95/18805	0.0210526315789474	6.09068825910931	2.92953315805009	0.0427654611816035	0.197688561725814	0.157842563124548	PFN2/FERMT2	2	PT
GO:0042326	negative regulation of phosphorylation	3/65	226/18805	0.0132743362831858	3.84036759700477	2.5299655532203	0.0434282794493179	0.197688561725814	0.157842563124548	INHBA/CALM2/PLPP3	3	PT
GO:0010660	regulation of muscle cell apoptotic process	2/65	96/18805	0.0208333333333333	6.02724358974359	2.90828701563116	0.0435800571085173	0.197688561725814	0.157842563124548	SOD2/GRP	2	PT
GO:0045104	intermediate filament cytoskeleton organization	2/65	96/18805	0.0208333333333333	6.02724358974359	2.90828701563116	0.0435800571085173	0.197688561725814	0.157842563124548	KRT19/TCHH	2	PT
GO:0072091	regulation of stem cell proliferation	2/65	96/18805	0.0208333333333333	6.02724358974359	2.90828701563116	0.0435800571085173	0.197688561725814	0.157842563124548	WNT5A/FERMT2	2	PT
GO:0090287	regulation of cellular response to growth factor stimulus	4/65	384/18805	0.0104166666666667	3.01362179487179	2.34792338011608	0.0437885414082675	0.197688561725814	0.157842563124548	CILP/WNT5A/SMOC2/TGFB1I1	4	PT
GO:0032905	transforming growth factor beta1 production	1/65	13/18805	0.0769230769230769	22.2544378698225	4.51473022017286	0.0440284154757244	0.197688561725814	0.157842563124548	LUM	1	PT
GO:0033690	positive regulation of osteoblast proliferation	1/65	13/18805	0.0769230769230769	22.2544378698225	4.51473022017286	0.0440284154757244	0.197688561725814	0.157842563124548	CTHRC1	1	PT
GO:0045039	protein insertion into mitochondrial inner membrane	1/65	13/18805	0.0769230769230769	22.2544378698225	4.51473022017286	0.0440284154757244	0.197688561725814	0.157842563124548	NDUFA13	1	PT
GO:0045737	positive regulation of cyclin-dependent protein serine/threonine kinase activity	1/65	13/18805	0.0769230769230769	22.2544378698225	4.51473022017286	0.0440284154757244	0.197688561725814	0.157842563124548	CCND2	1	PT
GO:0045916	negative regulation of complement activation	1/65	13/18805	0.0769230769230769	22.2544378698225	4.51473022017286	0.0440284154757244	0.197688561725814	0.157842563124548	CD59	1	PT
GO:0048853	forebrain morphogenesis	1/65	13/18805	0.0769230769230769	22.2544378698225	4.51473022017286	0.0440284154757244	0.197688561725814	0.157842563124548	WNT5A	1	PT
GO:0051610	serotonin uptake	1/65	13/18805	0.0769230769230769	22.2544378698225	4.51473022017286	0.0440284154757244	0.197688561725814	0.157842563124548	GPM6B	1	PT
GO:0060134	prepulse inhibition	1/65	13/18805	0.0769230769230769	22.2544378698225	4.51473022017286	0.0440284154757244	0.197688561725814	0.157842563124548	BACE1	1	PT
GO:0061029	eyelid development in camera-type eye	1/65	13/18805	0.0769230769230769	22.2544378698225	4.51473022017286	0.0440284154757244	0.197688561725814	0.157842563124548	INHBA	1	PT
GO:1902306	negative regulation of sodium ion transmembrane transport	1/65	13/18805	0.0769230769230769	22.2544378698225	4.51473022017286	0.0440284154757244	0.197688561725814	0.157842563124548	GRP	1	PT
GO:1905065	positive regulation of vascular associated smooth muscle cell differentiation	1/65	13/18805	0.0769230769230769	22.2544378698225	4.51473022017286	0.0440284154757244	0.197688561725814	0.157842563124548	SOD2	1	PT
GO:0045103	intermediate filament-based process	2/65	97/18805	0.0206185567010309	5.96510705789056	2.88733921948158	0.0444004558148592	0.197996548242657	0.158088472047159	KRT19/TCHH	2	PT
GO:2001257	regulation of cation channel activity	2/65	97/18805	0.0206185567010309	5.96510705789056	2.88733921948158	0.0444004558148592	0.197996548242657	0.158088472047159	CALM2/GRP	2	PT
GO:0010631	epithelial cell migration	2/65	98/18805	0.0204081632653061	5.90423861852433	2.86668229314007	0.0452266088344762	0.197996548242657	0.158088472047159	WNT5A/PFN2	2	PT
GO:0043502	regulation of muscle adaptation	2/65	98/18805	0.0204081632653061	5.90423861852433	2.86668229314007	0.0452266088344762	0.197996548242657	0.158088472047159	RGS4/FOXP1	2	PT
GO:0051153	regulation of striated muscle cell differentiation	2/65	98/18805	0.0204081632653061	5.90423861852433	2.86668229314007	0.0452266088344762	0.197996548242657	0.158088472047159	RGS4/FOXP1	2	PT
GO:0071674	mononuclear cell migration	3/65	230/18805	0.0130434782608696	3.77357859531773	2.49251046354907	0.045348447341068	0.197996548242657	0.158088472047159	CXCR4/WNT5A/CH25H	3	PT
GO:0050848	regulation of calcium-mediated signaling	2/65	99/18805	0.0202020202020202	5.84459984459985	2.84630902277413	0.0460584679577098	0.197996548242657	0.158088472047159	CALM2/FHL2	2	PT
GO:0060395	SMAD protein signal transduction	2/65	99/18805	0.0202020202020202	5.84459984459985	2.84630902277413	0.0460584679577098	0.197996548242657	0.158088472047159	INHBA/CILP	2	PT
GO:0098869	cellular oxidant detoxification	2/65	99/18805	0.0202020202020202	5.84459984459985	2.84630902277413	0.0460584679577098	0.197996548242657	0.158088472047159	SOD2/GPX8	2	PT
GO:0043583	ear development	3/65	232/18805	0.0129310344827586	3.74104774535809	2.47409612918118	0.0463242437963346	0.197996548242657	0.158088472047159	WNT5A/CTHRC1/GJB2	3	PT
GO:0001841	neural tube formation	2/65	100/18805	0.02	5.78615384615385	2.82621244539126	0.0468959852302483	0.197996548242657	0.158088472047159	WNT5A/CTHRC1	2	PT
GO:0060419	heart growth	2/65	100/18805	0.02	5.78615384615385	2.82621244539126	0.0468959852302483	0.197996548242657	0.158088472047159	RGS4/FOXP1	2	PT
GO:0030595	leukocyte chemotaxis	3/65	234/18805	0.0128205128205128	3.70907297830375	2.4558848184259	0.0473104669744257	0.197996548242657	0.158088472047159	CXCR4/WNT5A/CH25H	3	PT
GO:0002467	germinal center formation	1/65	14/18805	0.0714285714285714	20.6648351648352	4.33487309903885	0.0473350434554005	0.197996548242657	0.158088472047159	TNFAIP3	1	PT
GO:0005513	detection of calcium ion	1/65	14/18805	0.0714285714285714	20.6648351648352	4.33487309903885	0.0473350434554005	0.197996548242657	0.158088472047159	CALM2	1	PT
GO:0007638	mechanosensory behavior	1/65	14/18805	0.0714285714285714	20.6648351648352	4.33487309903885	0.0473350434554005	0.197996548242657	0.158088472047159	ETV1	1	PT
GO:0009159	deoxyribonucleoside monophosphate catabolic process	1/65	14/18805	0.0714285714285714	20.6648351648352	4.33487309903885	0.0473350434554005	0.197996548242657	0.158088472047159	TYMP	1	PT
GO:0010820	positive regulation of T cell chemotaxis	1/65	14/18805	0.0714285714285714	20.6648351648352	4.33487309903885	0.0473350434554005	0.197996548242657	0.158088472047159	WNT5A	1	PT
GO:0042541	hemoglobin biosynthetic process	1/65	14/18805	0.0714285714285714	20.6648351648352	4.33487309903885	0.0473350434554005	0.197996548242657	0.158088472047159	INHBA	1	PT
GO:0046655	folic acid metabolic process	1/65	14/18805	0.0714285714285714	20.6648351648352	4.33487309903885	0.0473350434554005	0.197996548242657	0.158088472047159	ALDH1L2	1	PT
GO:0051284	positive regulation of sequestering of calcium ion	1/65	14/18805	0.0714285714285714	20.6648351648352	4.33487309903885	0.0473350434554005	0.197996548242657	0.158088472047159	CALM2	1	PT
GO:0051956	negative regulation of amino acid transport	1/65	14/18805	0.0714285714285714	20.6648351648352	4.33487309903885	0.0473350434554005	0.197996548242657	0.158088472047159	RGS4	1	PT
GO:0060081	membrane hyperpolarization	1/65	14/18805	0.0714285714285714	20.6648351648352	4.33487309903885	0.0473350434554005	0.197996548242657	0.158088472047159	SOD2	1	PT
GO:0071285	cellular response to lithium ion	1/65	14/18805	0.0714285714285714	20.6648351648352	4.33487309903885	0.0473350434554005	0.197996548242657	0.158088472047159	FABP4	1	PT
GO:1900025	negative regulation of substrate adhesion-dependent cell spreading	1/65	14/18805	0.0714285714285714	20.6648351648352	4.33487309903885	0.0473350434554005	0.197996548242657	0.158088472047159	POSTN	1	PT
GO:1904031	positive regulation of cyclin-dependent protein kinase activity	1/65	14/18805	0.0714285714285714	20.6648351648352	4.33487309903885	0.0473350434554005	0.197996548242657	0.158088472047159	CCND2	1	PT
GO:1905809	negative regulation of synapse organization	1/65	14/18805	0.0714285714285714	20.6648351648352	4.33487309903885	0.0473350434554005	0.197996548242657	0.158088472047159	WNT5A	1	PT
GO:2000303	regulation of ceramide biosynthetic process	1/65	14/18805	0.0714285714285714	20.6648351648352	4.33487309903885	0.0473350434554005	0.197996548242657	0.158088472047159	SPHK1	1	PT
GO:2001279	regulation of unsaturated fatty acid biosynthetic process	1/65	14/18805	0.0714285714285714	20.6648351648352	4.33487309903885	0.0473350434554005	0.197996548242657	0.158088472047159	FABP5	1	PT
GO:0034446	substrate adhesion-dependent cell spreading	2/65	101/18805	0.0198019801980198	5.72886519421173	2.80638583769164	0.047739112951981	0.197996548242657	0.158088472047159	FERMT2/POSTN	2	PT
GO:0090132	epithelium migration	2/65	101/18805	0.0198019801980198	5.72886519421173	2.80638583769164	0.047739112951981	0.197996548242657	0.158088472047159	WNT5A/PFN2	2	PT
GO:0003073	regulation of systemic arterial blood pressure	2/65	102/18805	0.0196078431372549	5.67269984917044	2.78682270552148	0.0485878036758598	0.197996548242657	0.158088472047159	SOD2/POSTN	2	PT
GO:0010657	muscle cell apoptotic process	2/65	102/18805	0.0196078431372549	5.67269984917044	2.78682270552148	0.0485878036758598	0.197996548242657	0.158088472047159	SOD2/GRP	2	PT
GO:0097191	extrinsic apoptotic signaling pathway	3/65	237/18805	0.0126582278481013	3.66212268743914	2.42893941432847	0.048809269654445	0.197996548242657	0.158088472047159	TNFAIP3/INHBA/NDUFA13	3	PT
GO:2001233	regulation of apoptotic signaling pathway	4/65	399/18805	0.0100250626566416	2.90032774243301	2.25960357856349	0.0491794972238866	0.197996548242657	0.158088472047159	TNFAIP3/SOD2/INHBA/WNT5A	4	PT
GO:0060560	developmental growth involved in morphogenesis	3/65	238/18805	0.0126050420168067	3.64673561732385	2.4200546750102	0.0493140427221244	0.197996548242657	0.158088472047159	CXCR4/WNT5A/POSTN	3	PT
GO:0046620	regulation of organ growth	2/65	103/18805	0.0194174757281553	5.61762509335325	2.76751677388905	0.0494420102067632	0.197996548242657	0.158088472047159	RGS4/FOXP1	2	PT
GO:0051588	regulation of neurotransmitter transport	2/65	103/18805	0.0194174757281553	5.61762509335325	2.76751677388905	0.0494420102067632	0.197996548242657	0.158088472047159	GPM6B/PFN2	2	PT
GO:0003300	cardiac muscle hypertrophy	2/65	104/18805	0.0192307692307692	5.56360946745562	2.74846197750822	0.0503016856003667	0.197996548242657	0.158088472047159	RGS4/FOXP1	2	PT
GO:0043266	regulation of potassium ion transport	2/65	104/18805	0.0192307692307692	5.56360946745562	2.74846197750822	0.0503016856003667	0.197996548242657	0.158088472047159	GRP/RGS4	2	PT
GO:0000082	G1/S transition of mitotic cell cycle	3/65	240/18805	0.0125	3.61634615384615	2.40242784505814	0.0503313175075806	0.197996548242657	0.158088472047159	CCND2/INHBA/TMEM14B	3	PT
GO:0001976	nervous system process involved in regulation of systemic arterial blood pressure	1/65	15/18805	0.0666666666666667	19.2871794871795	4.17278466089955	0.0506304094378073	0.197996548242657	0.158088472047159	SOD2	1	PT
GO:0003376	sphingosine-1-phosphate receptor signaling pathway	1/65	15/18805	0.0666666666666667	19.2871794871795	4.17278466089955	0.0506304094378073	0.197996548242657	0.158088472047159	SPHK1	1	PT
GO:0010801	negative regulation of peptidyl-threonine phosphorylation	1/65	15/18805	0.0666666666666667	19.2871794871795	4.17278466089955	0.0506304094378073	0.197996548242657	0.158088472047159	CALM2	1	PT
GO:0010819	regulation of T cell chemotaxis	1/65	15/18805	0.0666666666666667	19.2871794871795	4.17278466089955	0.0506304094378073	0.197996548242657	0.158088472047159	WNT5A	1	PT
GO:0034058	endosomal vesicle fusion	1/65	15/18805	0.0666666666666667	19.2871794871795	4.17278466089955	0.0506304094378073	0.197996548242657	0.158088472047159	SPHK1	1	PT
GO:0046512	sphingosine biosynthetic process	1/65	15/18805	0.0666666666666667	19.2871794871795	4.17278466089955	0.0506304094378073	0.197996548242657	0.158088472047159	SPHK1	1	PT
GO:0046520	sphingoid biosynthetic process	1/65	15/18805	0.0666666666666667	19.2871794871795	4.17278466089955	0.0506304094378073	0.197996548242657	0.158088472047159	SPHK1	1	PT
GO:0048820	hair follicle maturation	1/65	15/18805	0.0666666666666667	19.2871794871795	4.17278466089955	0.0506304094378073	0.197996548242657	0.158088472047159	WNT5A	1	PT
GO:0048935	peripheral nervous system neuron development	1/65	15/18805	0.0666666666666667	19.2871794871795	4.17278466089955	0.0506304094378073	0.197996548242657	0.158088472047159	ETV1	1	PT
GO:0055012	ventricular cardiac muscle cell differentiation	1/65	15/18805	0.0666666666666667	19.2871794871795	4.17278466089955	0.0506304094378073	0.197996548242657	0.158088472047159	FHL2	1	PT
GO:0060026	convergent extension	1/65	15/18805	0.0666666666666667	19.2871794871795	4.17278466089955	0.0506304094378073	0.197996548242657	0.158088472047159	WNT5A	1	PT
GO:0060347	heart trabecula formation	1/65	15/18805	0.0666666666666667	19.2871794871795	4.17278466089955	0.0506304094378073	0.197996548242657	0.158088472047159	FHL2	1	PT
GO:0060572	morphogenesis of an epithelial bud	1/65	15/18805	0.0666666666666667	19.2871794871795	4.17278466089955	0.0506304094378073	0.197996548242657	0.158088472047159	WNT5A	1	PT
GO:0060766	negative regulation of androgen receptor signaling pathway	1/65	15/18805	0.0666666666666667	19.2871794871795	4.17278466089955	0.0506304094378073	0.197996548242657	0.158088472047159	FOXP1	1	PT
GO:0070234	positive regulation of T cell apoptotic process	1/65	15/18805	0.0666666666666667	19.2871794871795	4.17278466089955	0.0506304094378073	0.197996548242657	0.158088472047159	WNT5A	1	PT
GO:0070243	regulation of thymocyte apoptotic process	1/65	15/18805	0.0666666666666667	19.2871794871795	4.17278466089955	0.0506304094378073	0.197996548242657	0.158088472047159	WNT5A	1	PT
GO:0070424	regulation of nucleotide-binding domain, leucine rich repeat containing receptor signaling pathway	1/65	15/18805	0.0666666666666667	19.2871794871795	4.17278466089955	0.0506304094378073	0.197996548242657	0.158088472047159	TNFAIP3	1	PT
GO:0070885	negative regulation of calcineurin-NFAT signaling cascade	1/65	15/18805	0.0666666666666667	19.2871794871795	4.17278466089955	0.0506304094378073	0.197996548242657	0.158088472047159	FHL2	1	PT
GO:0071361	cellular response to ethanol	1/65	15/18805	0.0666666666666667	19.2871794871795	4.17278466089955	0.0506304094378073	0.197996548242657	0.158088472047159	SOD2	1	PT
GO:0090153	regulation of sphingolipid biosynthetic process	1/65	15/18805	0.0666666666666667	19.2871794871795	4.17278466089955	0.0506304094378073	0.197996548242657	0.158088472047159	SPHK1	1	PT
GO:0106057	negative regulation of calcineurin-mediated signaling	1/65	15/18805	0.0666666666666667	19.2871794871795	4.17278466089955	0.0506304094378073	0.197996548242657	0.158088472047159	FHL2	1	PT
GO:0150011	regulation of neuron projection arborization	1/65	15/18805	0.0666666666666667	19.2871794871795	4.17278466089955	0.0506304094378073	0.197996548242657	0.158088472047159	WNT5A	1	PT
GO:2000052	positive regulation of non-canonical Wnt signaling pathway	1/65	15/18805	0.0666666666666667	19.2871794871795	4.17278466089955	0.0506304094378073	0.197996548242657	0.158088472047159	WNT5A	1	PT
GO:2001028	positive regulation of endothelial cell chemotaxis	1/65	15/18805	0.0666666666666667	19.2871794871795	4.17278466089955	0.0506304094378073	0.197996548242657	0.158088472047159	SMOC2	1	PT
GO:0043255	regulation of carbohydrate biosynthetic process	2/65	105/18805	0.019047619047619	5.51062271062271	2.72965245183691	0.0511667831620162	0.197996548242657	0.158088472047159	C1QTNF3/NNMT	2	PT
GO:0002027	regulation of heart rate	2/65	106/18805	0.0188679245283019	5.45863570391872	2.71108252458008	0.0520372564456076	0.197996548242657	0.158088472047159	CALM2/RGS4	2	PT
GO:0110020	regulation of actomyosin structure organization	2/65	106/18805	0.0188679245283019	5.45863570391872	2.71108252458008	0.0520372564456076	0.197996548242657	0.158088472047159	PFN2/FERMT2	2	PT
GO:0014897	striated muscle hypertrophy	2/65	107/18805	0.0186915887850467	5.40762041696621	2.69274670762896	0.0529130592524697	0.197996548242657	0.158088472047159	RGS4/FOXP1	2	PT
GO:0032231	regulation of actin filament bundle assembly	2/65	107/18805	0.0186915887850467	5.40762041696621	2.69274670762896	0.0529130592524697	0.197996548242657	0.158088472047159	PFN2/FERMT2	2	PT
GO:1901222	regulation of non-canonical NF-kappaB signal transduction	2/65	107/18805	0.0186915887850467	5.40762041696621	2.69274670762896	0.0529130592524697	0.197996548242657	0.158088472047159	C1QTNF3/SPHK1	2	PT
GO:0019751	polyol metabolic process	2/65	108/18805	0.0185185185185185	5.35754985754986	2.67463968941038	0.0537941456302523	0.197996548242657	0.158088472047159	PLPP3/SPHK1	2	PT
GO:0097306	cellular response to alcohol	2/65	108/18805	0.0185185185185185	5.35754985754986	2.67463968941038	0.0537941456302523	0.197996548242657	0.158088472047159	SOD2/INHBA	2	PT
GO:0002399	MHC class II protein complex assembly	1/65	16/18805	0.0625	18.0817307692308	4.02565948625783	0.0539145511827002	0.197996548242657	0.158088472047159	HLA-DMA	1	PT
GO:0002503	peptide antigen assembly with MHC class II protein complex	1/65	16/18805	0.0625	18.0817307692308	4.02565948625783	0.0539145511827002	0.197996548242657	0.158088472047159	HLA-DMA	1	PT
GO:0002903	negative regulation of B cell apoptotic process	1/65	16/18805	0.0625	18.0817307692308	4.02565948625783	0.0539145511827002	0.197996548242657	0.158088472047159	FOXP1	1	PT
GO:0003188	heart valve formation	1/65	16/18805	0.0625	18.0817307692308	4.02565948625783	0.0539145511827002	0.197996548242657	0.158088472047159	CDH11	1	PT
GO:0006206	pyrimidine nucleobase metabolic process	1/65	16/18805	0.0625	18.0817307692308	4.02565948625783	0.0539145511827002	0.197996548242657	0.158088472047159	TYMP	1	PT
GO:0006361	transcription initiation at RNA polymerase I promoter	1/65	16/18805	0.0625	18.0817307692308	4.02565948625783	0.0539145511827002	0.197996548242657	0.158088472047159	CAVIN1	1	PT
GO:0010226	response to lithium ion	1/65	16/18805	0.0625	18.0817307692308	4.02565948625783	0.0539145511827002	0.197996548242657	0.158088472047159	FABP4	1	PT
GO:0010273	detoxification of copper ion	1/65	16/18805	0.0625	18.0817307692308	4.02565948625783	0.0539145511827002	0.197996548242657	0.158088472047159	MT1X	1	PT
GO:0010649	regulation of cell communication by electrical coupling	1/65	16/18805	0.0625	18.0817307692308	4.02565948625783	0.0539145511827002	0.197996548242657	0.158088472047159	CALM2	1	PT
GO:0023035	CD40 signaling pathway	1/65	16/18805	0.0625	18.0817307692308	4.02565948625783	0.0539145511827002	0.197996548242657	0.158088472047159	TNFAIP3	1	PT
GO:0030903	notochord development	1/65	16/18805	0.0625	18.0817307692308	4.02565948625783	0.0539145511827002	0.197996548242657	0.158088472047159	WNT5A	1	PT
GO:0031665	negative regulation of lipopolysaccharide-mediated signaling pathway	1/65	16/18805	0.0625	18.0817307692308	4.02565948625783	0.0539145511827002	0.197996548242657	0.158088472047159	TNFAIP3	1	PT
GO:0032354	response to follicle-stimulating hormone	1/65	16/18805	0.0625	18.0817307692308	4.02565948625783	0.0539145511827002	0.197996548242657	0.158088472047159	INHBA	1	PT
GO:0034349	glial cell apoptotic process	1/65	16/18805	0.0625	18.0817307692308	4.02565948625783	0.0539145511827002	0.197996548242657	0.158088472047159	AKAP12	1	PT
GO:0043455	regulation of secondary metabolic process	1/65	16/18805	0.0625	18.0817307692308	4.02565948625783	0.0539145511827002	0.197996548242657	0.158088472047159	WNT5A	1	PT
GO:0045779	negative regulation of bone resorption	1/65	16/18805	0.0625	18.0817307692308	4.02565948625783	0.0539145511827002	0.197996548242657	0.158088472047159	TNFAIP3	1	PT
GO:0045836	positive regulation of meiotic nuclear division	1/65	16/18805	0.0625	18.0817307692308	4.02565948625783	0.0539145511827002	0.197996548242657	0.158088472047159	WNT5A	1	PT
GO:0048021	regulation of melanin biosynthetic process	1/65	16/18805	0.0625	18.0817307692308	4.02565948625783	0.0539145511827002	0.197996548242657	0.158088472047159	WNT5A	1	PT
GO:0048934	peripheral nervous system neuron differentiation	1/65	16/18805	0.0625	18.0817307692308	4.02565948625783	0.0539145511827002	0.197996548242657	0.158088472047159	ETV1	1	PT
GO:0050665	hydrogen peroxide biosynthetic process	1/65	16/18805	0.0625	18.0817307692308	4.02565948625783	0.0539145511827002	0.197996548242657	0.158088472047159	SOD2	1	PT
GO:0051969	regulation of transmission of nerve impulse	1/65	16/18805	0.0625	18.0817307692308	4.02565948625783	0.0539145511827002	0.197996548242657	0.158088472047159	TYMP	1	PT
GO:0070593	dendrite self-avoidance	1/65	16/18805	0.0625	18.0817307692308	4.02565948625783	0.0539145511827002	0.197996548242657	0.158088472047159	NEXN	1	PT
GO:0099509	regulation of presynaptic cytosolic calcium ion concentration	1/65	16/18805	0.0625	18.0817307692308	4.02565948625783	0.0539145511827002	0.197996548242657	0.158088472047159	CALB2	1	PT
GO:1900376	regulation of secondary metabolite biosynthetic process	1/65	16/18805	0.0625	18.0817307692308	4.02565948625783	0.0539145511827002	0.197996548242657	0.158088472047159	WNT5A	1	PT
GO:1901298	regulation of hydrogen peroxide-mediated programmed cell death	1/65	16/18805	0.0625	18.0817307692308	4.02565948625783	0.0539145511827002	0.197996548242657	0.158088472047159	FOXP1	1	PT
GO:1904948	midbrain dopaminergic neuron differentiation	1/65	16/18805	0.0625	18.0817307692308	4.02565948625783	0.0539145511827002	0.197996548242657	0.158088472047159	WNT5A	1	PT
GO:1990169	stress response to copper ion	1/65	16/18805	0.0625	18.0817307692308	4.02565948625783	0.0539145511827002	0.197996548242657	0.158088472047159	MT1X	1	PT
GO:0022604	regulation of cell morphogenesis	3/65	247/18805	0.0121457489878543	3.5138586110246	2.34218257362623	0.0539723924098503	0.197996548242657	0.158088472047159	CXCR4/WNT5A/FERMT2	3	PT
GO:0014896	muscle hypertrophy	2/65	109/18805	0.018348623853211	5.30839802399435	2.6567563276217	0.0546804698718188	0.198651733491085	0.15861159851452	RGS4/FOXP1	2	PT
GO:0006939	smooth muscle contraction	2/65	110/18805	0.0181818181818182	5.26013986013986	2.63909164232852	0.0555719865141432	0.198651733491085	0.15861159851452	ACTA2/SPHK1	2	PT
GO:0032760	positive regulation of tumor necrosis factor production	2/65	110/18805	0.0181818181818182	5.26013986013986	2.63909164232852	0.0555719865141432	0.198651733491085	0.15861159851452	WNT5A/AKAP12	2	PT
GO:0042472	inner ear morphogenesis	2/65	110/18805	0.0181818181818182	5.26013986013986	2.63909164232852	0.0555719865141432	0.198651733491085	0.15861159851452	WNT5A/CTHRC1	2	PT
GO:0072676	lymphocyte migration	2/65	110/18805	0.0181818181818182	5.26013986013986	2.63909164232852	0.0555719865141432	0.198651733491085	0.15861159851452	WNT5A/CH25H	2	PT
GO:0033002	muscle cell proliferation	3/65	251/18805	0.0119521912350598	3.45786086423537	2.30872595523007	0.0561088013862488	0.198651733491085	0.15861159851452	TNFAIP3/SOD2/FOXP1	3	PT
GO:0048738	cardiac muscle tissue development	3/65	251/18805	0.0119521912350598	3.45786086423537	2.30872595523007	0.0561088013862488	0.198651733491085	0.15861159851452	RGS4/FHL2/FOXP1	3	PT
GO:0007229	integrin-mediated signaling pathway	2/65	111/18805	0.018018018018018	5.21275121275121	2.62164080940398	0.0564686503372116	0.198651733491085	0.15861159851452	PLPP3/FERMT2	2	PT
GO:0090100	positive regulation of transmembrane receptor protein serine/threonine kinase signaling pathway	2/65	111/18805	0.018018018018018	5.21275121275121	2.62164080940398	0.0564686503372116	0.198651733491085	0.15861159851452	INHBA/TGFB1I1	2	PT
GO:1901655	cellular response to ketone	2/65	111/18805	0.018018018018018	5.21275121275121	2.62164080940398	0.0564686503372116	0.198651733491085	0.15861159851452	GJB2/POSTN	2	PT
GO:0002921	negative regulation of humoral immune response	1/65	17/18805	0.0588235294117647	17.0180995475113	3.89127729104555	0.0571875063252373	0.198651733491085	0.15861159851452	CD59	1	PT
GO:0010766	negative regulation of sodium ion transport	1/65	17/18805	0.0588235294117647	17.0180995475113	3.89127729104555	0.0571875063252373	0.198651733491085	0.15861159851452	GRP	1	PT
GO:0010958	regulation of amino acid import across plasma membrane	1/65	17/18805	0.0588235294117647	17.0180995475113	3.89127729104555	0.0571875063252373	0.198651733491085	0.15861159851452	RGS4	1	PT
GO:0015816	glycine transport	1/65	17/18805	0.0588235294117647	17.0180995475113	3.89127729104555	0.0571875063252373	0.198651733491085	0.15861159851452	RGS4	1	PT
GO:0030728	ovulation	1/65	17/18805	0.0588235294117647	17.0180995475113	3.89127729104555	0.0571875063252373	0.198651733491085	0.15861159851452	INHBA	1	PT
GO:0033623	regulation of integrin activation	1/65	17/18805	0.0588235294117647	17.0180995475113	3.89127729104555	0.0571875063252373	0.198651733491085	0.15861159851452	FERMT2	1	PT
GO:0034134	toll-like receptor 2 signaling pathway	1/65	17/18805	0.0588235294117647	17.0180995475113	3.89127729104555	0.0571875063252373	0.198651733491085	0.15861159851452	TNFAIP3	1	PT
GO:0036166	phenotypic switching	1/65	17/18805	0.0588235294117647	17.0180995475113	3.89127729104555	0.0571875063252373	0.198651733491085	0.15861159851452	SOD2	1	PT
GO:0043649	dicarboxylic acid catabolic process	1/65	17/18805	0.0588235294117647	17.0180995475113	3.89127729104555	0.0571875063252373	0.198651733491085	0.15861159851452	ALDH1L2	1	PT
GO:0045198	establishment of epithelial cell apical/basal polarity	1/65	17/18805	0.0588235294117647	17.0180995475113	3.89127729104555	0.0571875063252373	0.198651733491085	0.15861159851452	WNT5A	1	PT
GO:0048841	regulation of axon extension involved in axon guidance	1/65	17/18805	0.0588235294117647	17.0180995475113	3.89127729104555	0.0571875063252373	0.198651733491085	0.15861159851452	WNT5A	1	PT
GO:0050872	white fat cell differentiation	1/65	17/18805	0.0588235294117647	17.0180995475113	3.89127729104555	0.0571875063252373	0.198651733491085	0.15861159851452	FABP4	1	PT
GO:0061548	ganglion development	1/65	17/18805	0.0588235294117647	17.0180995475113	3.89127729104555	0.0571875063252373	0.198651733491085	0.15861159851452	RGS4	1	PT
GO:0072109	glomerular mesangium development	1/65	17/18805	0.0588235294117647	17.0180995475113	3.89127729104555	0.0571875063252373	0.198651733491085	0.15861159851452	ACTA2	1	PT
GO:0098885	modification of postsynaptic actin cytoskeleton	1/65	17/18805	0.0588235294117647	17.0180995475113	3.89127729104555	0.0571875063252373	0.198651733491085	0.15861159851452	PFN2	1	PT
GO:1900119	positive regulation of execution phase of apoptosis	1/65	17/18805	0.0588235294117647	17.0180995475113	3.89127729104555	0.0571875063252373	0.198651733491085	0.15861159851452	NDUFA13	1	PT
GO:1902033	regulation of hematopoietic stem cell proliferation	1/65	17/18805	0.0588235294117647	17.0180995475113	3.89127729104555	0.0571875063252373	0.198651733491085	0.15861159851452	WNT5A	1	PT
GO:1903789	regulation of amino acid transmembrane transport	1/65	17/18805	0.0588235294117647	17.0180995475113	3.89127729104555	0.0571875063252373	0.198651733491085	0.15861159851452	RGS4	1	PT
GO:1903817	negative regulation of voltage-gated potassium channel activity	1/65	17/18805	0.0588235294117647	17.0180995475113	3.89127729104555	0.0571875063252373	0.198651733491085	0.15861159851452	GRP	1	PT
GO:2000345	regulation of hepatocyte proliferation	1/65	17/18805	0.0588235294117647	17.0180995475113	3.89127729104555	0.0571875063252373	0.198651733491085	0.15861159851452	TNFAIP3	1	PT
GO:0051924	regulation of calcium ion transport	3/65	253/18805	0.0118577075098814	3.43052599574339	2.29225099289756	0.0571920793211372	0.198651733491085	0.15861159851452	CXCR4/CALM2/RGS4	3	PT
GO:0060047	heart contraction	3/65	254/18805	0.0118110236220472	3.41701998788613	2.28407543894708	0.0577374667341812	0.200202688590269	0.159849943950437	CXCR4/CALM2/RGS4	3	PT
GO:0006672	ceramide metabolic process	2/65	113/18805	0.0176991150442478	5.12049012933969	2.58736214606063	0.0582772398540261	0.201332002569355	0.160751634020288	PLPP3/SPHK1	2	PT
GO:0001776	leukocyte homeostasis	2/65	114/18805	0.0175438596491228	5.07557354925776	2.57052539177423	0.0591890763129821	0.201332002569355	0.160751634020288	TNFAIP3/TSC22D3	2	PT
GO:0030038	contractile actin filament bundle assembly	2/65	114/18805	0.0175438596491228	5.07557354925776	2.57052539177423	0.0591890763129821	0.201332002569355	0.160751634020288	PFN2/FERMT2	2	PT
GO:0043149	stress fiber assembly	2/65	114/18805	0.0175438596491228	5.07557354925776	2.57052539177423	0.0591890763129821	0.201332002569355	0.160751634020288	PFN2/FERMT2	2	PT
GO:1903557	positive regulation of tumor necrosis factor superfamily cytokine production	2/65	114/18805	0.0175438596491228	5.07557354925776	2.57052539177423	0.0591890763129821	0.201332002569355	0.160751634020288	WNT5A/AKAP12	2	PT
GO:0033559	unsaturated fatty acid metabolic process	2/65	115/18805	0.0173913043478261	5.0314381270903	2.55388463109161	0.0601058814809356	0.201332002569355	0.160751634020288	CTHRC1/FABP5	2	PT
GO:0003128	heart field specification	1/65	18/18805	0.0555555555555556	16.0726495726496	3.7678546714281	0.0604493123763792	0.201332002569355	0.160751634020288	WNT5A	1	PT
GO:0006213	pyrimidine nucleoside metabolic process	1/65	18/18805	0.0555555555555556	16.0726495726496	3.7678546714281	0.0604493123763792	0.201332002569355	0.160751634020288	TYMP	1	PT
GO:0009125	nucleoside monophosphate catabolic process	1/65	18/18805	0.0555555555555556	16.0726495726496	3.7678546714281	0.0604493123763792	0.201332002569355	0.160751634020288	TYMP	1	PT
GO:0009223	pyrimidine deoxyribonucleotide catabolic process	1/65	18/18805	0.0555555555555556	16.0726495726496	3.7678546714281	0.0604493123763792	0.201332002569355	0.160751634020288	TYMP	1	PT
GO:0010310	regulation of hydrogen peroxide metabolic process	1/65	18/18805	0.0555555555555556	16.0726495726496	3.7678546714281	0.0604493123763792	0.201332002569355	0.160751634020288	SOD2	1	PT
GO:0010633	negative regulation of epithelial cell migration	1/65	18/18805	0.0555555555555556	16.0726495726496	3.7678546714281	0.0604493123763792	0.201332002569355	0.160751634020288	PFN2	1	PT
GO:0016264	gap junction assembly	1/65	18/18805	0.0555555555555556	16.0726495726496	3.7678546714281	0.0604493123763792	0.201332002569355	0.160751634020288	GJB2	1	PT
GO:0032148	activation of protein kinase B activity	1/65	18/18805	0.0555555555555556	16.0726495726496	3.7678546714281	0.0604493123763792	0.201332002569355	0.160751634020288	WNT5A	1	PT
GO:0032274	gonadotropin secretion	1/65	18/18805	0.0555555555555556	16.0726495726496	3.7678546714281	0.0604493123763792	0.201332002569355	0.160751634020288	INHBA	1	PT
GO:0033631	cell-cell adhesion mediated by integrin	1/65	18/18805	0.0555555555555556	16.0726495726496	3.7678546714281	0.0604493123763792	0.201332002569355	0.160751634020288	PLPP3	1	PT
GO:0035358	regulation of peroxisome proliferator activated receptor signaling pathway	1/65	18/18805	0.0555555555555556	16.0726495726496	3.7678546714281	0.0604493123763792	0.201332002569355	0.160751634020288	FABP5	1	PT
GO:0043217	myelin maintenance	1/65	18/18805	0.0555555555555556	16.0726495726496	3.7678546714281	0.0604493123763792	0.201332002569355	0.160751634020288	CXCR4	1	PT
GO:0046653	tetrahydrofolate metabolic process	1/65	18/18805	0.0555555555555556	16.0726495726496	3.7678546714281	0.0604493123763792	0.201332002569355	0.160751634020288	ALDH1L2	1	PT
GO:0046851	negative regulation of bone remodeling	1/65	18/18805	0.0555555555555556	16.0726495726496	3.7678546714281	0.0604493123763792	0.201332002569355	0.160751634020288	TNFAIP3	1	PT
GO:0070206	protein trimerization	1/65	18/18805	0.0555555555555556	16.0726495726496	3.7678546714281	0.0604493123763792	0.201332002569355	0.160751634020288	COL1A2	1	PT
GO:0070230	positive regulation of lymphocyte apoptotic process	1/65	18/18805	0.0555555555555556	16.0726495726496	3.7678546714281	0.0604493123763792	0.201332002569355	0.160751634020288	WNT5A	1	PT
GO:0071371	cellular response to gonadotropin stimulus	1/65	18/18805	0.0555555555555556	16.0726495726496	3.7678546714281	0.0604493123763792	0.201332002569355	0.160751634020288	INHBA	1	PT
GO:1905048	regulation of metallopeptidase activity	1/65	18/18805	0.0555555555555556	16.0726495726496	3.7678546714281	0.0604493123763792	0.201332002569355	0.160751634020288	TIMP3	1	PT
GO:0018958	phenol-containing compound metabolic process	2/65	116/18805	0.0172413793103448	4.98806366047745	2.53743573115174	0.0610276113366138	0.202591660584661	0.161757396053561	WNT5A/DIO2	2	PT
GO:0045833	negative regulation of lipid metabolic process	2/65	116/18805	0.0172413793103448	4.98806366047745	2.53743573115174	0.0610276113366138	0.202591660584661	0.161757396053561	CH25H/SPHK1	2	PT
GO:0006766	vitamin metabolic process	2/65	117/18805	0.0170940170940171	4.94543063773833	2.52117468168692	0.0619542220952586	0.204102078504235	0.162963374961666	ALDH1L2/NNMT	2	PT
GO:0046883	regulation of hormone secretion	3/65	262/18805	0.0114503816793893	3.3126834997064	2.22010673669595	0.0621897536182277	0.204102078504235	0.162963374961666	INHBA/C1QTNF3/GRP	3	PT
GO:0003015	heart process	3/65	263/18805	0.0114068441064639	3.30008774495467	2.21228460019555	0.062757347745901	0.204102078504235	0.162963374961666	CXCR4/CALM2/RGS4	3	PT
GO:0051347	positive regulation of transferase activity	3/65	263/18805	0.0114068441064639	3.30008774495467	2.21228460019555	0.062757347745901	0.204102078504235	0.162963374961666	CCND2/CALM2/WNT5A	3	PT
GO:0033209	tumor necrosis factor-mediated signaling pathway	2/65	118/18805	0.0169491525423729	4.90352020860495	2.50509759036532	0.06288567020756	0.204102078504235	0.162963374961666	TNFAIP3/SPHK1	2	PT
GO:0010421	hydrogen peroxide-mediated programmed cell death	1/65	19/18805	0.0526315789473684	15.2267206477733	3.65394033648743	0.0637000067232969	0.204102078504235	0.162963374961666	FOXP1	1	PT
GO:0020027	hemoglobin metabolic process	1/65	19/18805	0.0526315789473684	15.2267206477733	3.65394033648743	0.0637000067232969	0.204102078504235	0.162963374961666	INHBA	1	PT
GO:0030540	female genitalia development	1/65	19/18805	0.0526315789473684	15.2267206477733	3.65394033648743	0.0637000067232969	0.204102078504235	0.162963374961666	WNT5A	1	PT
GO:0036035	osteoclast development	1/65	19/18805	0.0526315789473684	15.2267206477733	3.65394033648743	0.0637000067232969	0.204102078504235	0.162963374961666	FOXP1	1	PT
GO:0036342	post-anal tail morphogenesis	1/65	19/18805	0.0526315789473684	15.2267206477733	3.65394033648743	0.0637000067232969	0.204102078504235	0.162963374961666	WNT5A	1	PT
GO:0042481	regulation of odontogenesis	1/65	19/18805	0.0526315789473684	15.2267206477733	3.65394033648743	0.0637000067232969	0.204102078504235	0.162963374961666	APCDD1	1	PT
GO:0045217	cell-cell junction maintenance	1/65	19/18805	0.0526315789473684	15.2267206477733	3.65394033648743	0.0637000067232969	0.204102078504235	0.162963374961666	FERMT2	1	PT
GO:0045721	negative regulation of gluconeogenesis	1/65	19/18805	0.0526315789473684	15.2267206477733	3.65394033648743	0.0637000067232969	0.204102078504235	0.162963374961666	C1QTNF3	1	PT
GO:0045945	positive regulation of transcription by RNA polymerase III	1/65	19/18805	0.0526315789473684	15.2267206477733	3.65394033648743	0.0637000067232969	0.204102078504235	0.162963374961666	INHBA	1	PT
GO:0048339	paraxial mesoderm development	1/65	19/18805	0.0526315789473684	15.2267206477733	3.65394033648743	0.0637000067232969	0.204102078504235	0.162963374961666	WNT5A	1	PT
GO:0060039	pericardium development	1/65	19/18805	0.0526315789473684	15.2267206477733	3.65394033648743	0.0637000067232969	0.204102078504235	0.162963374961666	WNT5A	1	PT
GO:0060314	regulation of ryanodine-sensitive calcium-release channel activity	1/65	19/18805	0.0526315789473684	15.2267206477733	3.65394033648743	0.0637000067232969	0.204102078504235	0.162963374961666	CALM2	1	PT
GO:0070431	nucleotide-binding oligomerization domain containing 2 signaling pathway	1/65	19/18805	0.0526315789473684	15.2267206477733	3.65394033648743	0.0637000067232969	0.204102078504235	0.162963374961666	TNFAIP3	1	PT
GO:0071636	positive regulation of transforming growth factor beta production	1/65	19/18805	0.0526315789473684	15.2267206477733	3.65394033648743	0.0637000067232969	0.204102078504235	0.162963374961666	LUM	1	PT
GO:0098751	bone cell development	1/65	19/18805	0.0526315789473684	15.2267206477733	3.65394033648743	0.0637000067232969	0.204102078504235	0.162963374961666	FOXP1	1	PT
GO:0140131	positive regulation of lymphocyte chemotaxis	1/65	19/18805	0.0526315789473684	15.2267206477733	3.65394033648743	0.0637000067232969	0.204102078504235	0.162963374961666	WNT5A	1	PT
GO:1904044	response to aldosterone	1/65	19/18805	0.0526315789473684	15.2267206477733	3.65394033648743	0.0637000067232969	0.204102078504235	0.162963374961666	INHBA	1	PT
GO:0032355	response to estradiol	2/65	120/18805	0.0166666666666667	4.82179487179487	2.47348027605241	0.0647629054667585	0.205036975041974	0.163709834263533	GJB2/POSTN	2	PT
GO:0051092	positive regulation of NF-kappaB transcription factor activity	2/65	120/18805	0.0166666666666667	4.82179487179487	2.47348027605241	0.0647629054667585	0.205036975041974	0.163709834263533	WNT5A/SPHK1	2	PT
GO:0110053	regulation of actin filament organization	3/65	267/18805	0.0112359550561798	3.25064822817632	2.18136740299031	0.0650520308590982	0.205036975041974	0.163709834263533	RGS4/PFN2/FERMT2	3	PT
GO:0001838	embryonic epithelial tube formation	2/65	121/18805	0.0165289256198347	4.78194532739987	2.45793281909998	0.0657086066827302	0.205036975041974	0.163709834263533	WNT5A/CTHRC1	2	PT
GO:0015908	fatty acid transport	2/65	121/18805	0.0165289256198347	4.78194532739987	2.45793281909998	0.0657086066827302	0.205036975041974	0.163709834263533	FABP4/FABP5	2	PT
GO:1902414	protein localization to cell junction	2/65	121/18805	0.0165289256198347	4.78194532739987	2.45793281909998	0.0657086066827302	0.205036975041974	0.163709834263533	WNT5A/FERMT2	2	PT
GO:0035924	cellular response to vascular endothelial growth factor stimulus	2/65	122/18805	0.0163934426229508	4.74274905422446	2.44255484445689	0.0666589733884033	0.205036975041974	0.163709834263533	SPHK1/SMOC2	2	PT
GO:1901888	regulation of cell junction assembly	3/65	270/18805	0.0111111111111111	3.21452991452991	2.15856009690279	0.0667983875777261	0.205036975041974	0.163709834263533	WNT5A/GPM6B/FERMT2	3	PT
GO:0007351	tripartite regional subdivision	1/65	20/18805	0.05	14.4653846153846	3.54833951154906	0.0669396266297687	0.205036975041974	0.163709834263533	WNT5A	1	PT
GO:0008595	anterior/posterior axis specification, embryo	1/65	20/18805	0.05	14.4653846153846	3.54833951154906	0.0669396266297687	0.205036975041974	0.163709834263533	WNT5A	1	PT
GO:0031954	positive regulation of protein autophosphorylation	1/65	20/18805	0.05	14.4653846153846	3.54833951154906	0.0669396266297687	0.205036975041974	0.163709834263533	CALM2	1	PT
GO:0045655	regulation of monocyte differentiation	1/65	20/18805	0.05	14.4653846153846	3.54833951154906	0.0669396266297687	0.205036975041974	0.163709834263533	FOXP1	1	PT
GO:0051580	regulation of neurotransmitter uptake	1/65	20/18805	0.05	14.4653846153846	3.54833951154906	0.0669396266297687	0.205036975041974	0.163709834263533	GPM6B	1	PT
GO:0051797	regulation of hair follicle development	1/65	20/18805	0.05	14.4653846153846	3.54833951154906	0.0669396266297687	0.205036975041974	0.163709834263533	WNT5A	1	PT
GO:0055093	response to hyperoxia	1/65	20/18805	0.05	14.4653846153846	3.54833951154906	0.0669396266297687	0.205036975041974	0.163709834263533	SOD2	1	PT
GO:0060216	definitive hemopoiesis	1/65	20/18805	0.05	14.4653846153846	3.54833951154906	0.0669396266297687	0.205036975041974	0.163709834263533	MFAP5	1	PT
GO:0060340	positive regulation of type I interferon-mediated signaling pathway	1/65	20/18805	0.05	14.4653846153846	3.54833951154906	0.0669396266297687	0.205036975041974	0.163709834263533	WNT5A	1	PT
GO:0060602	branch elongation of an epithelium	1/65	20/18805	0.05	14.4653846153846	3.54833951154906	0.0669396266297687	0.205036975041974	0.163709834263533	WNT5A	1	PT
GO:0071605	monocyte chemotactic protein-1 production	1/65	20/18805	0.05	14.4653846153846	3.54833951154906	0.0669396266297687	0.205036975041974	0.163709834263533	C1QTNF3	1	PT
GO:0071637	regulation of monocyte chemotactic protein-1 production	1/65	20/18805	0.05	14.4653846153846	3.54833951154906	0.0669396266297687	0.205036975041974	0.163709834263533	C1QTNF3	1	PT
GO:0097154	GABAergic neuron differentiation	1/65	20/18805	0.05	14.4653846153846	3.54833951154906	0.0669396266297687	0.205036975041974	0.163709834263533	INHBA	1	PT
GO:1900424	regulation of defense response to bacterium	1/65	20/18805	0.05	14.4653846153846	3.54833951154906	0.0669396266297687	0.205036975041974	0.163709834263533	FOXP1	1	PT
GO:1903428	positive regulation of reactive oxygen species biosynthetic process	1/65	20/18805	0.05	14.4653846153846	3.54833951154906	0.0669396266297687	0.205036975041974	0.163709834263533	SOD2	1	PT
GO:0010563	negative regulation of phosphorus metabolic process	3/65	271/18805	0.011070110701107	3.20266818052796	2.15102843004219	0.0673852996725998	0.205036975041974	0.163709834263533	INHBA/CALM2/PLPP3	3	PT
GO:0044843	cell cycle G1/S phase transition	3/65	271/18805	0.011070110701107	3.20266818052796	2.15102843004219	0.0673852996725998	0.205036975041974	0.163709834263533	CCND2/INHBA/TMEM14B	3	PT
GO:0045936	negative regulation of phosphate metabolic process	3/65	271/18805	0.011070110701107	3.20266818052796	2.15102843004219	0.0673852996725998	0.205036975041974	0.163709834263533	INHBA/CALM2/PLPP3	3	PT
GO:0001894	tissue homeostasis	3/65	272/18805	0.0110294117647059	3.19089366515837	2.14353162369913	0.0679745974885044	0.205036975041974	0.163709834263533	TNFAIP3/TFF1/TFF3	3	PT
GO:0009636	response to toxic substance	3/65	272/18805	0.0110294117647059	3.19089366515837	2.14353162369913	0.0679745974885044	0.205036975041974	0.163709834263533	SOD2/GPX8/MT1X	3	PT
GO:0060249	anatomical structure homeostasis	3/65	272/18805	0.0110294117647059	3.19089366515837	2.14353162369913	0.0679745974885044	0.205036975041974	0.163709834263533	TNFAIP3/TFF1/TFF3	3	PT
GO:0006690	icosanoid metabolic process	2/65	124/18805	0.0161290322580645	4.66625310173697	2.41229397468364	0.0685735339462768	0.205036975041974	0.163709834263533	CTHRC1/FABP5	2	PT
GO:0032609	type II interferon production	2/65	124/18805	0.0161290322580645	4.66625310173697	2.41229397468364	0.0685735339462768	0.205036975041974	0.163709834263533	INHBA/WNT5A	2	PT
GO:0032649	regulation of type II interferon production	2/65	124/18805	0.0161290322580645	4.66625310173697	2.41229397468364	0.0685735339462768	0.205036975041974	0.163709834263533	INHBA/WNT5A	2	PT
GO:0043500	muscle adaptation	2/65	124/18805	0.0161290322580645	4.66625310173697	2.41229397468364	0.0685735339462768	0.205036975041974	0.163709834263533	RGS4/FOXP1	2	PT
GO:0090068	positive regulation of cell cycle process	3/65	274/18805	0.0109489051094891	3.16760247052218	2.12864136329334	0.069160323914542	0.205036975041974	0.163709834263533	CCND2/WNT5A/SPHK1	3	PT
GO:0032102	negative regulation of response to external stimulus	4/65	448/18805	0.00892857142857143	2.5831043956044	1.99730649413348	0.0692355215734329	0.205036975041974	0.163709834263533	TNFAIP3/C1QTNF3/WNT5A/BACE1	4	PT
GO:0046660	female sex differentiation	2/65	125/18805	0.016	4.62892307692308	2.39740462777559	0.0695376437089893	0.205036975041974	0.163709834263533	INHBA/WNT5A	2	PT
GO:0062014	negative regulation of small molecule metabolic process	2/65	125/18805	0.016	4.62892307692308	2.39740462777559	0.0695376437089893	0.205036975041974	0.163709834263533	C1QTNF3/CH25H	2	PT
GO:1990748	cellular detoxification	2/65	125/18805	0.016	4.62892307692308	2.39740462777559	0.0695376437089893	0.205036975041974	0.163709834263533	SOD2/GPX8	2	PT
GO:0048762	mesenchymal cell differentiation	3/65	275/18805	0.0109090909090909	3.15608391608392	2.12124730422612	0.0697567392448063	0.205036975041974	0.163709834263533	WNT5A/FERMT2/TGFB1I1	3	PT
GO:0002396	MHC protein complex assembly	1/65	21/18805	0.0476190476190476	13.7765567765568	3.45005837267244	0.0701682092365865	0.205036975041974	0.163709834263533	HLA-DMA	1	PT
GO:0002501	peptide antigen assembly with MHC protein complex	1/65	21/18805	0.0476190476190476	13.7765567765568	3.45005837267244	0.0701682092365865	0.205036975041974	0.163709834263533	HLA-DMA	1	PT
GO:0002544	chronic inflammatory response	1/65	21/18805	0.0476190476190476	13.7765567765568	3.45005837267244	0.0701682092365865	0.205036975041974	0.163709834263533	TNFAIP3	1	PT
GO:0002902	regulation of B cell apoptotic process	1/65	21/18805	0.0476190476190476	13.7765567765568	3.45005837267244	0.0701682092365865	0.205036975041974	0.163709834263533	FOXP1	1	PT
GO:0006244	pyrimidine nucleotide catabolic process	1/65	21/18805	0.0476190476190476	13.7765567765568	3.45005837267244	0.0701682092365865	0.205036975041974	0.163709834263533	TYMP	1	PT
GO:0010288	response to lead ion	1/65	21/18805	0.0476190476190476	13.7765567765568	3.45005837267244	0.0701682092365865	0.205036975041974	0.163709834263533	BACE1	1	PT
GO:0010829	negative regulation of D-glucose transmembrane transport	1/65	21/18805	0.0476190476190476	13.7765567765568	3.45005837267244	0.0701682092365865	0.205036975041974	0.163709834263533	FABP5	1	PT
GO:0032261	purine nucleotide salvage	1/65	21/18805	0.0476190476190476	13.7765567765568	3.45005837267244	0.0701682092365865	0.205036975041974	0.163709834263533	NNMT	1	PT
GO:0032495	response to muramyl dipeptide	1/65	21/18805	0.0476190476190476	13.7765567765568	3.45005837267244	0.0701682092365865	0.205036975041974	0.163709834263533	TNFAIP3	1	PT
GO:0034144	negative regulation of toll-like receptor 4 signaling pathway	1/65	21/18805	0.0476190476190476	13.7765567765568	3.45005837267244	0.0701682092365865	0.205036975041974	0.163709834263533	TNFAIP3	1	PT
GO:0046596	regulation of viral entry into host cell	1/65	21/18805	0.0476190476190476	13.7765567765568	3.45005837267244	0.0701682092365865	0.205036975041974	0.163709834263533	CH25H	1	PT
GO:0048846	axon extension involved in axon guidance	1/65	21/18805	0.0476190476190476	13.7765567765568	3.45005837267244	0.0701682092365865	0.205036975041974	0.163709834263533	WNT5A	1	PT
GO:0050849	negative regulation of calcium-mediated signaling	1/65	21/18805	0.0476190476190476	13.7765567765568	3.45005837267244	0.0701682092365865	0.205036975041974	0.163709834263533	FHL2	1	PT
GO:0050965	detection of temperature stimulus involved in sensory perception of pain	1/65	21/18805	0.0476190476190476	13.7765567765568	3.45005837267244	0.0701682092365865	0.205036975041974	0.163709834263533	CXCR4	1	PT
GO:0051930	regulation of sensory perception of pain	1/65	21/18805	0.0476190476190476	13.7765567765568	3.45005837267244	0.0701682092365865	0.205036975041974	0.163709834263533	FABP5	1	PT
GO:0051931	regulation of sensory perception	1/65	21/18805	0.0476190476190476	13.7765567765568	3.45005837267244	0.0701682092365865	0.205036975041974	0.163709834263533	FABP5	1	PT
GO:0070242	thymocyte apoptotic process	1/65	21/18805	0.0476190476190476	13.7765567765568	3.45005837267244	0.0701682092365865	0.205036975041974	0.163709834263533	WNT5A	1	PT
GO:0071397	cellular response to cholesterol	1/65	21/18805	0.0476190476190476	13.7765567765568	3.45005837267244	0.0701682092365865	0.205036975041974	0.163709834263533	INHBA	1	PT
GO:0097468	programmed cell death in response to reactive oxygen species	1/65	21/18805	0.0476190476190476	13.7765567765568	3.45005837267244	0.0701682092365865	0.205036975041974	0.163709834263533	FOXP1	1	PT
GO:0097501	stress response to metal ion	1/65	21/18805	0.0476190476190476	13.7765567765568	3.45005837267244	0.0701682092365865	0.205036975041974	0.163709834263533	MT1X	1	PT
GO:1902284	neuron projection extension involved in neuron projection guidance	1/65	21/18805	0.0476190476190476	13.7765567765568	3.45005837267244	0.0701682092365865	0.205036975041974	0.163709834263533	WNT5A	1	PT
GO:1903978	regulation of microglial cell activation	1/65	21/18805	0.0476190476190476	13.7765567765568	3.45005837267244	0.0701682092365865	0.205036975041974	0.163709834263533	SPHK1	1	PT
GO:0097305	response to alcohol	3/65	276/18805	0.0108695652173913	3.14464882943144	2.11388689554282	0.0703555137373752	0.205288062418134	0.1639103126052	SOD2/INHBA/RGS4	3	PT
GO:0010717	regulation of epithelial to mesenchymal transition	2/65	126/18805	0.0158730158730159	4.59218559218559	2.38267185302035	0.0705062507803579	0.205431881770108	0.164025143807088	FERMT2/TGFB1I1	2	PT
GO:0022612	gland morphogenesis	2/65	127/18805	0.015748031496063	4.55602665051484	2.36809264185657	0.0714793136827896	0.207967830758116	0.166049948301217	TNFAIP3/WNT5A	2	PT
GO:0030278	regulation of ossification	2/65	128/18805	0.015625	4.52043269230769	2.35366406720109	0.072456791163704	0.209304546356264	0.167117236232994	WNT5A/GPM6B	2	PT
GO:0030282	bone mineralization	2/65	128/18805	0.015625	4.52043269230769	2.35366406720109	0.072456791163704	0.209304546356264	0.167117236232994	COL1A2/GPM6B	2	PT
GO:0072089	stem cell proliferation	2/65	128/18805	0.015625	4.52043269230769	2.35366406720109	0.072456791163704	0.209304546356264	0.167117236232994	WNT5A/FERMT2	2	PT
GO:0098742	cell-cell adhesion via plasma-membrane adhesion molecules	3/65	280/18805	0.0107142857142857	3.09972527472527	2.08477595582703	0.0727740681260649	0.209304546356264	0.167117236232994	CDH11/PCDH7/NEXN	3	PT
GO:0044772	mitotic cell cycle phase transition	4/65	457/18805	0.0087527352297593	2.5322336307019	1.95292574633455	0.0733196270391032	0.209304546356264	0.167117236232994	CCND2/INHBA/CALM2/TMEM14B	4	PT
GO:0048568	embryonic organ development	4/65	457/18805	0.0087527352297593	2.5322336307019	1.95292574633455	0.0733196270391032	0.209304546356264	0.167117236232994	KRT19/WNT5A/CTHRC1/MFAP5	4	PT
GO:0006837	serotonin transport	1/65	22/18805	0.0454545454545455	13.1503496503496	3.35826252567164	0.0733857915619495	0.209304546356264	0.167117236232994	GPM6B	1	PT
GO:0009129	pyrimidine nucleoside monophosphate metabolic process	1/65	22/18805	0.0454545454545455	13.1503496503496	3.35826252567164	0.0733857915619495	0.209304546356264	0.167117236232994	TYMP	1	PT
GO:0010737	protein kinase A signaling	1/65	22/18805	0.0454545454545455	13.1503496503496	3.35826252567164	0.0733857915619495	0.209304546356264	0.167117236232994	AKAP12	1	PT
GO:0030449	regulation of complement activation	1/65	22/18805	0.0454545454545455	13.1503496503496	3.35826252567164	0.0733857915619495	0.209304546356264	0.167117236232994	CD59	1	PT
GO:0034104	negative regulation of tissue remodeling	1/65	22/18805	0.0454545454545455	13.1503496503496	3.35826252567164	0.0733857915619495	0.209304546356264	0.167117236232994	TNFAIP3	1	PT
GO:0035089	establishment of apical/basal cell polarity	1/65	22/18805	0.0454545454545455	13.1503496503496	3.35826252567164	0.0733857915619495	0.209304546356264	0.167117236232994	WNT5A	1	PT
GO:1901017	negative regulation of potassium ion transmembrane transporter activity	1/65	22/18805	0.0454545454545455	13.1503496503496	3.35826252567164	0.0733857915619495	0.209304546356264	0.167117236232994	GRP	1	PT
GO:1905038	regulation of membrane lipid metabolic process	1/65	22/18805	0.0454545454545455	13.1503496503496	3.35826252567164	0.0733857915619495	0.209304546356264	0.167117236232994	SPHK1	1	PT
GO:0002761	regulation of myeloid leukocyte differentiation	2/65	130/18805	0.0153846153846154	4.4508875739645	2.32524750961636	0.0744248259696039	0.211969441052669	0.169244996208915	INHBA/FOXP1	2	PT
GO:0042471	ear morphogenesis	2/65	131/18805	0.0152671755725191	4.41691133294187	2.31125405503863	0.0754153019053303	0.212174598175487	0.169408801974034	WNT5A/CTHRC1	2	PT
GO:0045471	response to ethanol	2/65	131/18805	0.0152671755725191	4.41691133294187	2.31125405503863	0.0754153019053303	0.212174598175487	0.169408801974034	SOD2/RGS4	2	PT
GO:0046718	symbiont entry into host cell	2/65	131/18805	0.0152671755725191	4.41691133294187	2.31125405503863	0.0754153019053303	0.212174598175487	0.169408801974034	CXCR4/CH25H	2	PT
GO:0001704	formation of primary germ layer	2/65	132/18805	0.0151515151515152	4.38344988344988	2.29740028858739	0.076410029639001	0.212174598175487	0.169408801974034	INHBA/WNT5A	2	PT
GO:0090596	sensory organ morphogenesis	3/65	286/18805	0.0104895104895105	3.03469607315761	2.04207084066149	0.0764715136920679	0.212174598175487	0.169408801974034	WNT5A/CTHRC1/MFAP5	3	PT
GO:0003283	atrial septum development	1/65	23/18805	0.0434782608695652	12.5785953177258	3.27224551722245	0.0765924105018673	0.212174598175487	0.169408801974034	WNT5A	1	PT
GO:0006590	thyroid hormone generation	1/65	23/18805	0.0434782608695652	12.5785953177258	3.27224551722245	0.0765924105018673	0.212174598175487	0.169408801974034	DIO2	1	PT
GO:0006740	NADPH regeneration	1/65	23/18805	0.0434782608695652	12.5785953177258	3.27224551722245	0.0765924105018673	0.212174598175487	0.169408801974034	ALDH1L2	1	PT
GO:0010881	regulation of cardiac muscle contraction by regulation of the release of sequestered calcium ion	1/65	23/18805	0.0434782608695652	12.5785953177258	3.27224551722245	0.0765924105018673	0.212174598175487	0.169408801974034	CALM2	1	PT
GO:0019430	removal of superoxide radicals	1/65	23/18805	0.0434782608695652	12.5785953177258	3.27224551722245	0.0765924105018673	0.212174598175487	0.169408801974034	SOD2	1	PT
GO:0032891	negative regulation of organic acid transport	1/65	23/18805	0.0434782608695652	12.5785953177258	3.27224551722245	0.0765924105018673	0.212174598175487	0.169408801974034	RGS4	1	PT
GO:0033762	response to glucagon	1/65	23/18805	0.0434782608695652	12.5785953177258	3.27224551722245	0.0765924105018673	0.212174598175487	0.169408801974034	GJB2	1	PT
GO:0034312	diol biosynthetic process	1/65	23/18805	0.0434782608695652	12.5785953177258	3.27224551722245	0.0765924105018673	0.212174598175487	0.169408801974034	SPHK1	1	PT
GO:0045722	positive regulation of gluconeogenesis	1/65	23/18805	0.0434782608695652	12.5785953177258	3.27224551722245	0.0765924105018673	0.212174598175487	0.169408801974034	NNMT	1	PT
GO:0060008	Sertoli cell differentiation	1/65	23/18805	0.0434782608695652	12.5785953177258	3.27224551722245	0.0765924105018673	0.212174598175487	0.169408801974034	INHBA	1	PT
GO:0060444	branching involved in mammary gland duct morphogenesis	1/65	23/18805	0.0434782608695652	12.5785953177258	3.27224551722245	0.0765924105018673	0.212174598175487	0.169408801974034	WNT5A	1	PT
GO:0060706	cell differentiation involved in embryonic placenta development	1/65	23/18805	0.0434782608695652	12.5785953177258	3.27224551722245	0.0765924105018673	0.212174598175487	0.169408801974034	KRT19	1	PT
GO:0061687	detoxification of inorganic compound	1/65	23/18805	0.0434782608695652	12.5785953177258	3.27224551722245	0.0765924105018673	0.212174598175487	0.169408801974034	MT1X	1	PT
GO:1902074	response to salt	1/65	23/18805	0.0434782608695652	12.5785953177258	3.27224551722245	0.0765924105018673	0.212174598175487	0.169408801974034	GRP	1	PT
GO:2000047	regulation of cell-cell adhesion mediated by cadherin	1/65	23/18805	0.0434782608695652	12.5785953177258	3.27224551722245	0.0765924105018673	0.212174598175487	0.169408801974034	WNT5A	1	PT
GO:0038061	non-canonical NF-kappaB signal transduction	2/65	133/18805	0.0150375939849624	4.35049161364951	2.28368365043193	0.0774089690278794	0.214143664318929	0.170980984220338	C1QTNF3/SPHK1	2	PT
GO:0050864	regulation of B cell activation	2/65	134/18805	0.0149253731343284	4.31802525832377	2.27010164692168	0.0784120801481827	0.215427877642493	0.172006352207339	TNFAIP3/INHBA	2	PT
GO:0072175	epithelial tube formation	2/65	134/18805	0.0149253731343284	4.31802525832377	2.27010164692168	0.0784120801481827	0.215427877642493	0.172006352207339	WNT5A/CTHRC1	2	PT
GO:0008543	fibroblast growth factor receptor signaling pathway	2/65	135/18805	0.0148148148148148	4.28603988603989	2.25665184839111	0.079419323294087	0.215427877642493	0.172006352207339	WNT5A/SMOC2	2	PT
GO:0021782	glial cell development	2/65	135/18805	0.0148148148148148	4.28603988603989	2.25665184839111	0.079419323294087	0.215427877642493	0.172006352207339	GPM6B/CNTN1	2	PT
GO:0097237	cellular response to toxic substance	2/65	135/18805	0.0148148148148148	4.28603988603989	2.25665184839111	0.079419323294087	0.215427877642493	0.172006352207339	SOD2/GPX8	2	PT
GO:0003323	type B pancreatic cell development	1/65	24/18805	0.0416666666666667	12.0544871794872	3.19140463292777	0.0797881028305528	0.215427877642493	0.172006352207339	WNT5A	1	PT
GO:0006730	one-carbon metabolic process	1/65	24/18805	0.0416666666666667	12.0544871794872	3.19140463292777	0.0797881028305528	0.215427877642493	0.172006352207339	ALDH1L2	1	PT
GO:0009219	pyrimidine deoxyribonucleotide metabolic process	1/65	24/18805	0.0416666666666667	12.0544871794872	3.19140463292777	0.0797881028305528	0.215427877642493	0.172006352207339	TYMP	1	PT
GO:0042438	melanin biosynthetic process	1/65	24/18805	0.0416666666666667	12.0544871794872	3.19140463292777	0.0797881028305528	0.215427877642493	0.172006352207339	WNT5A	1	PT
GO:0043576	regulation of respiratory gaseous exchange	1/65	24/18805	0.0416666666666667	12.0544871794872	3.19140463292777	0.0797881028305528	0.215427877642493	0.172006352207339	GRP	1	PT
GO:0060571	morphogenesis of an epithelial fold	1/65	24/18805	0.0416666666666667	12.0544871794872	3.19140463292777	0.0797881028305528	0.215427877642493	0.172006352207339	WNT5A	1	PT
GO:0061162	establishment of monopolar cell polarity	1/65	24/18805	0.0416666666666667	12.0544871794872	3.19140463292777	0.0797881028305528	0.215427877642493	0.172006352207339	WNT5A	1	PT
GO:0071294	cellular response to zinc ion	1/65	24/18805	0.0416666666666667	12.0544871794872	3.19140463292777	0.0797881028305528	0.215427877642493	0.172006352207339	MT1X	1	PT
GO:0072574	hepatocyte proliferation	1/65	24/18805	0.0416666666666667	12.0544871794872	3.19140463292777	0.0797881028305528	0.215427877642493	0.172006352207339	TNFAIP3	1	PT
GO:0072575	epithelial cell proliferation involved in liver morphogenesis	1/65	24/18805	0.0416666666666667	12.0544871794872	3.19140463292777	0.0797881028305528	0.215427877642493	0.172006352207339	TNFAIP3	1	PT
GO:0086064	cell communication by electrical coupling involved in cardiac conduction	1/65	24/18805	0.0416666666666667	12.0544871794872	3.19140463292777	0.0797881028305528	0.215427877642493	0.172006352207339	CALM2	1	PT
GO:1903861	positive regulation of dendrite extension	1/65	24/18805	0.0416666666666667	12.0544871794872	3.19140463292777	0.0797881028305528	0.215427877642493	0.172006352207339	CXCR4	1	PT
GO:2001026	regulation of endothelial cell chemotaxis	1/65	24/18805	0.0416666666666667	12.0544871794872	3.19140463292777	0.0797881028305528	0.215427877642493	0.172006352207339	SMOC2	1	PT
GO:0044409	symbiont entry into host	2/65	136/18805	0.0147058823529412	4.25452488687783	2.24333188705313	0.0804306589767364	0.216873614417964	0.173160687067443	CXCR4/CH25H	2	PT
GO:0002407	dendritic cell chemotaxis	1/65	25/18805	0.04	11.5723076923077	3.1152220691369	0.0829729052008216	0.21764265936744	0.173774723736654	CXCR4	1	PT
GO:0003085	negative regulation of systemic arterial blood pressure	1/65	25/18805	0.04	11.5723076923077	3.1152220691369	0.0829729052008216	0.21764265936744	0.173774723736654	SOD2	1	PT
GO:0006582	melanin metabolic process	1/65	25/18805	0.04	11.5723076923077	3.1152220691369	0.0829729052008216	0.21764265936744	0.173774723736654	WNT5A	1	PT
GO:0007350	blastoderm segmentation	1/65	25/18805	0.04	11.5723076923077	3.1152220691369	0.0829729052008216	0.21764265936744	0.173774723736654	WNT5A	1	PT
GO:0009162	deoxyribonucleoside monophosphate metabolic process	1/65	25/18805	0.04	11.5723076923077	3.1152220691369	0.0829729052008216	0.21764265936744	0.173774723736654	TYMP	1	PT
GO:0030859	polarized epithelial cell differentiation	1/65	25/18805	0.04	11.5723076923077	3.1152220691369	0.0829729052008216	0.21764265936744	0.173774723736654	WNT5A	1	PT
GO:0032288	myelin assembly	1/65	25/18805	0.04	11.5723076923077	3.1152220691369	0.0829729052008216	0.21764265936744	0.173774723736654	CNTN1	1	PT
GO:0040037	negative regulation of fibroblast growth factor receptor signaling pathway	1/65	25/18805	0.04	11.5723076923077	3.1152220691369	0.0829729052008216	0.21764265936744	0.173774723736654	WNT5A	1	PT
GO:0043101	purine-containing compound salvage	1/65	25/18805	0.04	11.5723076923077	3.1152220691369	0.0829729052008216	0.21764265936744	0.173774723736654	NNMT	1	PT
GO:0043567	regulation of insulin-like growth factor receptor signaling pathway	1/65	25/18805	0.04	11.5723076923077	3.1152220691369	0.0829729052008216	0.21764265936744	0.173774723736654	CILP	1	PT
GO:0046697	decidualization	1/65	25/18805	0.04	11.5723076923077	3.1152220691369	0.0829729052008216	0.21764265936744	0.173774723736654	GJB2	1	PT
GO:0050855	regulation of B cell receptor signaling pathway	1/65	25/18805	0.04	11.5723076923077	3.1152220691369	0.0829729052008216	0.21764265936744	0.173774723736654	FOXP1	1	PT
GO:0050961	detection of temperature stimulus involved in sensory perception	1/65	25/18805	0.04	11.5723076923077	3.1152220691369	0.0829729052008216	0.21764265936744	0.173774723736654	CXCR4	1	PT
GO:0051152	positive regulation of smooth muscle cell differentiation	1/65	25/18805	0.04	11.5723076923077	3.1152220691369	0.0829729052008216	0.21764265936744	0.173774723736654	SOD2	1	PT
GO:0060907	positive regulation of macrophage cytokine production	1/65	25/18805	0.04	11.5723076923077	3.1152220691369	0.0829729052008216	0.21764265936744	0.173774723736654	WNT5A	1	PT
GO:0061339	establishment or maintenance of monopolar cell polarity	1/65	25/18805	0.04	11.5723076923077	3.1152220691369	0.0829729052008216	0.21764265936744	0.173774723736654	WNT5A	1	PT
GO:0071450	cellular response to oxygen radical	1/65	25/18805	0.04	11.5723076923077	3.1152220691369	0.0829729052008216	0.21764265936744	0.173774723736654	SOD2	1	PT
GO:0071451	cellular response to superoxide	1/65	25/18805	0.04	11.5723076923077	3.1152220691369	0.0829729052008216	0.21764265936744	0.173774723736654	SOD2	1	PT
GO:1901020	negative regulation of calcium ion transmembrane transporter activity	1/65	25/18805	0.04	11.5723076923077	3.1152220691369	0.0829729052008216	0.21764265936744	0.173774723736654	CALM2	1	PT
GO:1901623	regulation of lymphocyte chemotaxis	1/65	25/18805	0.04	11.5723076923077	3.1152220691369	0.0829729052008216	0.21764265936744	0.173774723736654	WNT5A	1	PT
GO:1905063	regulation of vascular associated smooth muscle cell differentiation	1/65	25/18805	0.04	11.5723076923077	3.1152220691369	0.0829729052008216	0.21764265936744	0.173774723736654	SOD2	1	PT
GO:0034762	regulation of transmembrane transport	4/65	478/18805	0.00836820083682008	2.42098487286772	1.85334	0.0833190614153616	0.217867113299728	0.173953936856859	CALM2/GRP/FABP5/RGS4	4	PT
GO:1903532	positive regulation of secretion by cell	3/65	297/18805	0.0101010101010101	2.92229992229992	1.96660271293427	0.0834625144625545	0.217867113299728	0.173953936856859	INHBA/C1QTNF3/GRP	3	PT
GO:0007266	Rho protein signal transduction	2/65	139/18805	0.0143884892086331	4.16270060874377	2.20412823459296	0.0834888295904143	0.217867113299728	0.173953936856859	COL1A2/FERMT2	2	PT
GO:0051592	response to calcium ion	2/65	139/18805	0.0143884892086331	4.16270060874377	2.20412823459296	0.0834888295904143	0.217867113299728	0.173953936856859	CALM2/WNT5A	2	PT
GO:0007200	phospholipase C-activating G protein-coupled receptor signaling pathway	2/65	140/18805	0.0142857142857143	4.13296703296703	2.19130511260795	0.084516144836381	0.218059224553221	0.174107326270953	WNT5A/GRP	2	PT
GO:0007498	mesoderm development	2/65	140/18805	0.0142857142857143	4.13296703296703	2.19130511260795	0.084516144836381	0.218059224553221	0.174107326270953	INHBA/WNT5A	2	PT
GO:0010927	cellular component assembly involved in morphogenesis	2/65	141/18805	0.0141843971631206	4.10365521003819	2.17860084901542	0.085547358394927	0.218059224553221	0.174107326270953	KRT19/CNTN1	2	PT
GO:0032989	cellular anatomical entity morphogenesis	2/65	141/18805	0.0141843971631206	4.10365521003819	2.17860084901542	0.085547358394927	0.218059224553221	0.174107326270953	KRT19/CNTN1	2	PT
GO:0009435	NAD biosynthetic process	1/65	26/18805	0.0384615384615385	11.1272189349112	3.04325012255125	0.0861468541444822	0.218059224553221	0.174107326270953	NNMT	1	PT
GO:0014829	vascular associated smooth muscle contraction	1/65	26/18805	0.0384615384615385	11.1272189349112	3.04325012255125	0.0861468541444822	0.218059224553221	0.174107326270953	ACTA2	1	PT
GO:0033598	mammary gland epithelial cell proliferation	1/65	26/18805	0.0384615384615385	11.1272189349112	3.04325012255125	0.0861468541444822	0.218059224553221	0.174107326270953	WNT5A	1	PT
GO:0033622	integrin activation	1/65	26/18805	0.0384615384615385	11.1272189349112	3.04325012255125	0.0861468541444822	0.218059224553221	0.174107326270953	FERMT2	1	PT
GO:0034138	toll-like receptor 3 signaling pathway	1/65	26/18805	0.0384615384615385	11.1272189349112	3.04325012255125	0.0861468541444822	0.218059224553221	0.174107326270953	TNFAIP3	1	PT
GO:0036315	cellular response to sterol	1/65	26/18805	0.0384615384615385	11.1272189349112	3.04325012255125	0.0861468541444822	0.218059224553221	0.174107326270953	INHBA	1	PT
GO:0044550	secondary metabolite biosynthetic process	1/65	26/18805	0.0384615384615385	11.1272189349112	3.04325012255125	0.0861468541444822	0.218059224553221	0.174107326270953	WNT5A	1	PT
GO:0048520	positive regulation of behavior	1/65	26/18805	0.0384615384615385	11.1272189349112	3.04325012255125	0.0861468541444822	0.218059224553221	0.174107326270953	GRP	1	PT
GO:0048596	embryonic camera-type eye morphogenesis	1/65	26/18805	0.0384615384615385	11.1272189349112	3.04325012255125	0.0861468541444822	0.218059224553221	0.174107326270953	WNT5A	1	PT
GO:0051446	positive regulation of meiotic cell cycle	1/65	26/18805	0.0384615384615385	11.1272189349112	3.04325012255125	0.0861468541444822	0.218059224553221	0.174107326270953	WNT5A	1	PT
GO:0051894	positive regulation of focal adhesion assembly	1/65	26/18805	0.0384615384615385	11.1272189349112	3.04325012255125	0.0861468541444822	0.218059224553221	0.174107326270953	FERMT2	1	PT
GO:0051953	negative regulation of amine transport	1/65	26/18805	0.0384615384615385	11.1272189349112	3.04325012255125	0.0861468541444822	0.218059224553221	0.174107326270953	RGS4	1	PT
GO:0060065	uterus development	1/65	26/18805	0.0384615384615385	11.1272189349112	3.04325012255125	0.0861468541444822	0.218059224553221	0.174107326270953	WNT5A	1	PT
GO:0060740	prostate gland epithelium morphogenesis	1/65	26/18805	0.0384615384615385	11.1272189349112	3.04325012255125	0.0861468541444822	0.218059224553221	0.174107326270953	WNT5A	1	PT
GO:0062009	secondary palate development	1/65	26/18805	0.0384615384615385	11.1272189349112	3.04325012255125	0.0861468541444822	0.218059224553221	0.174107326270953	WNT5A	1	PT
GO:0071276	cellular response to cadmium ion	1/65	26/18805	0.0384615384615385	11.1272189349112	3.04325012255125	0.0861468541444822	0.218059224553221	0.174107326270953	MT1X	1	PT
GO:0072576	liver morphogenesis	1/65	26/18805	0.0384615384615385	11.1272189349112	3.04325012255125	0.0861468541444822	0.218059224553221	0.174107326270953	TNFAIP3	1	PT
GO:1901021	positive regulation of calcium ion transmembrane transporter activity	1/65	26/18805	0.0384615384615385	11.1272189349112	3.04325012255125	0.0861468541444822	0.218059224553221	0.174107326270953	CALM2	1	PT
GO:2000050	regulation of non-canonical Wnt signaling pathway	1/65	26/18805	0.0384615384615385	11.1272189349112	3.04325012255125	0.0861468541444822	0.218059224553221	0.174107326270953	WNT5A	1	PT
GO:2000178	negative regulation of neural precursor cell proliferation	1/65	26/18805	0.0384615384615385	11.1272189349112	3.04325012255125	0.0861468541444822	0.218059224553221	0.174107326270953	WNT5A	1	PT
GO:0050792	regulation of viral process	2/65	142/18805	0.0140845070422535	4.07475622968581	2.16601340751874	0.0865824320584176	0.218888170934202	0.17476919067183	CXCR4/CH25H	2	PT
GO:0048562	embryonic organ morphogenesis	3/65	302/18805	0.00993377483443709	2.87391747325522	1.93343628217235	0.0867289614410015	0.218985220596045	0.174846679056803	WNT5A/CTHRC1/MFAP5	3	PT
GO:0010212	response to ionizing radiation	2/65	143/18805	0.013986013986014	4.04626143087682	2.15354080110773	0.0876213278293617	0.22096287528575	0.176425718746673	CCND2/SOD2	2	PT
GO:0001783	B cell apoptotic process	1/65	27/18805	0.037037037037037	10.7150997150997	2.97509942178992	0.0893099860727326	0.221058126310522	0.17650177102688	FOXP1	1	PT
GO:0002053	positive regulation of mesenchymal cell proliferation	1/65	27/18805	0.037037037037037	10.7150997150997	2.97509942178992	0.0893099860727326	0.221058126310522	0.17650177102688	WNT5A	1	PT
GO:0006760	folic acid-containing compound metabolic process	1/65	27/18805	0.037037037037037	10.7150997150997	2.97509942178992	0.0893099860727326	0.221058126310522	0.17650177102688	ALDH1L2	1	PT
GO:0010460	positive regulation of heart rate	1/65	27/18805	0.037037037037037	10.7150997150997	2.97509942178992	0.0893099860727326	0.221058126310522	0.17650177102688	RGS4	1	PT
GO:0032967	positive regulation of collagen biosynthetic process	1/65	27/18805	0.037037037037037	10.7150997150997	2.97509942178992	0.0893099860727326	0.221058126310522	0.17650177102688	INHBA	1	PT
GO:0035313	wound healing, spreading of epidermal cells	1/65	27/18805	0.037037037037037	10.7150997150997	2.97509942178992	0.0893099860727326	0.221058126310522	0.17650177102688	FERMT2	1	PT
GO:0036296	response to increased oxygen levels	1/65	27/18805	0.037037037037037	10.7150997150997	2.97509942178992	0.0893099860727326	0.221058126310522	0.17650177102688	SOD2	1	PT
GO:0043507	positive regulation of JUN kinase activity	1/65	27/18805	0.037037037037037	10.7150997150997	2.97509942178992	0.0893099860727326	0.221058126310522	0.17650177102688	WNT5A	1	PT
GO:0045649	regulation of macrophage differentiation	1/65	27/18805	0.037037037037037	10.7150997150997	2.97509942178992	0.0893099860727326	0.221058126310522	0.17650177102688	INHBA	1	PT
GO:0048714	positive regulation of oligodendrocyte differentiation	1/65	27/18805	0.037037037037037	10.7150997150997	2.97509942178992	0.0893099860727326	0.221058126310522	0.17650177102688	CXCR4	1	PT
GO:0060343	trabecula formation	1/65	27/18805	0.037037037037037	10.7150997150997	2.97509942178992	0.0893099860727326	0.221058126310522	0.17650177102688	FHL2	1	PT
GO:0071108	protein K48-linked deubiquitination	1/65	27/18805	0.037037037037037	10.7150997150997	2.97509942178992	0.0893099860727326	0.221058126310522	0.17650177102688	TNFAIP3	1	PT
GO:1903859	regulation of dendrite extension	1/65	27/18805	0.037037037037037	10.7150997150997	2.97509942178992	0.0893099860727326	0.221058126310522	0.17650177102688	CXCR4	1	PT
GO:0006874	intracellular calcium ion homeostasis	3/65	306/18805	0.00980392156862745	2.83634992458522	1.90738795086318	0.0893811513011018	0.221058126310522	0.17650177102688	CALM2/WNT5A/CALB2	3	PT
GO:0009581	detection of external stimulus	2/65	145/18805	0.0137931034482759	3.99045092838196	2.12893238280187	0.0897104347486143	0.221058126310522	0.17650177102688	CXCR4/BACE1	2	PT
GO:0001889	liver development	2/65	146/18805	0.0136986301369863	3.96311907270811	2.11679282982046	0.0907605709440478	0.221058126310522	0.17650177102688	TNFAIP3/SOD2	2	PT
GO:0051402	neuron apoptotic process	3/65	309/18805	0.00970873786407767	2.80881254667662	1.88812568180113	0.0913927443787462	0.221058126310522	0.17650177102688	COL6A3/SOD2/BACE1	3	PT
GO:0003158	endothelium development	2/65	147/18805	0.0136054421768707	3.93615907901622	2.10476062696767	0.0918143793392869	0.221058126310522	0.17650177102688	CXCR4/FOXP1	2	PT
GO:0009582	detection of abiotic stimulus	2/65	147/18805	0.0136054421768707	3.93615907901622	2.10476062696767	0.0918143793392869	0.221058126310522	0.17650177102688	CXCR4/BACE1	2	PT
GO:0051783	regulation of nuclear division	2/65	147/18805	0.0136054421768707	3.93615907901622	2.10476062696767	0.0918143793392869	0.221058126310522	0.17650177102688	WNT5A/SPHK1	2	PT
GO:0060048	cardiac muscle contraction	2/65	147/18805	0.0136054421768707	3.93615907901622	2.10476062696767	0.0918143793392869	0.221058126310522	0.17650177102688	CXCR4/CALM2	2	PT
GO:0000303	response to superoxide	1/65	28/18805	0.0357142857142857	10.3324175824176	2.91042948877895	0.0924623372765491	0.221058126310522	0.17650177102688	SOD2	1	PT
GO:0001964	startle response	1/65	28/18805	0.0357142857142857	10.3324175824176	2.91042948877895	0.0924623372765491	0.221058126310522	0.17650177102688	BACE1	1	PT
GO:0006353	DNA-templated transcription termination	1/65	28/18805	0.0357142857142857	10.3324175824176	2.91042948877895	0.0924623372765491	0.221058126310522	0.17650177102688	CAVIN1	1	PT
GO:0009264	deoxyribonucleotide catabolic process	1/65	28/18805	0.0357142857142857	10.3324175824176	2.91042948877895	0.0924623372765491	0.221058126310522	0.17650177102688	TYMP	1	PT
GO:0010714	positive regulation of collagen metabolic process	1/65	28/18805	0.0357142857142857	10.3324175824176	2.91042948877895	0.0924623372765491	0.221058126310522	0.17650177102688	INHBA	1	PT
GO:0010818	T cell chemotaxis	1/65	28/18805	0.0357142857142857	10.3324175824176	2.91042948877895	0.0924623372765491	0.221058126310522	0.17650177102688	WNT5A	1	PT
GO:0010882	regulation of cardiac muscle contraction by calcium ion signaling	1/65	28/18805	0.0357142857142857	10.3324175824176	2.91042948877895	0.0924623372765491	0.221058126310522	0.17650177102688	CALM2	1	PT
GO:0016048	detection of temperature stimulus	1/65	28/18805	0.0357142857142857	10.3324175824176	2.91042948877895	0.0924623372765491	0.221058126310522	0.17650177102688	CXCR4	1	PT
GO:0019359	nicotinamide nucleotide biosynthetic process	1/65	28/18805	0.0357142857142857	10.3324175824176	2.91042948877895	0.0924623372765491	0.221058126310522	0.17650177102688	NNMT	1	PT
GO:0019363	pyridine nucleotide biosynthetic process	1/65	28/18805	0.0357142857142857	10.3324175824176	2.91042948877895	0.0924623372765491	0.221058126310522	0.17650177102688	NNMT	1	PT
GO:0032740	positive regulation of interleukin-17 production	1/65	28/18805	0.0357142857142857	10.3324175824176	2.91042948877895	0.0924623372765491	0.221058126310522	0.17650177102688	SPHK1	1	PT
GO:0035025	positive regulation of Rho protein signal transduction	1/65	28/18805	0.0357142857142857	10.3324175824176	2.91042948877895	0.0924623372765491	0.221058126310522	0.17650177102688	FERMT2	1	PT
GO:0035357	peroxisome proliferator activated receptor signaling pathway	1/65	28/18805	0.0357142857142857	10.3324175824176	2.91042948877895	0.0924623372765491	0.221058126310522	0.17650177102688	FABP5	1	PT
GO:0035458	cellular response to interferon-beta	1/65	28/18805	0.0357142857142857	10.3324175824176	2.91042948877895	0.0924623372765491	0.221058126310522	0.17650177102688	NDUFA13	1	PT
GO:0043173	nucleotide salvage	1/65	28/18805	0.0357142857142857	10.3324175824176	2.91042948877895	0.0924623372765491	0.221058126310522	0.17650177102688	NNMT	1	PT
GO:0046386	deoxyribose phosphate catabolic process	1/65	28/18805	0.0357142857142857	10.3324175824176	2.91042948877895	0.0924623372765491	0.221058126310522	0.17650177102688	TYMP	1	PT
GO:0050857	positive regulation of antigen receptor-mediated signaling pathway	1/65	28/18805	0.0357142857142857	10.3324175824176	2.91042948877895	0.0924623372765491	0.221058126310522	0.17650177102688	FOXP1	1	PT
GO:0051043	regulation of membrane protein ectodomain proteolysis	1/65	28/18805	0.0357142857142857	10.3324175824176	2.91042948877895	0.0924623372765491	0.221058126310522	0.17650177102688	TIMP3	1	PT
GO:0052372	modulation by symbiont of entry into host	1/65	28/18805	0.0357142857142857	10.3324175824176	2.91042948877895	0.0924623372765491	0.221058126310522	0.17650177102688	CH25H	1	PT
GO:0060512	prostate gland morphogenesis	1/65	28/18805	0.0357142857142857	10.3324175824176	2.91042948877895	0.0924623372765491	0.221058126310522	0.17650177102688	WNT5A	1	PT
GO:0060586	multicellular organismal-level iron ion homeostasis	1/65	28/18805	0.0357142857142857	10.3324175824176	2.91042948877895	0.0924623372765491	0.221058126310522	0.17650177102688	SOD2	1	PT
GO:0070536	protein K63-linked deubiquitination	1/65	28/18805	0.0357142857142857	10.3324175824176	2.91042948877895	0.0924623372765491	0.221058126310522	0.17650177102688	TNFAIP3	1	PT
GO:0072529	pyrimidine-containing compound catabolic process	1/65	28/18805	0.0357142857142857	10.3324175824176	2.91042948877895	0.0924623372765491	0.221058126310522	0.17650177102688	TYMP	1	PT
GO:1904062	regulation of monoatomic cation transmembrane transport	3/65	311/18805	0.00964630225080386	2.79074944348256	1.87541160478615	0.0927443823808797	0.221367849587725	0.176749066649381	CALM2/GRP/RGS4	3	PT
GO:0035148	tube formation	2/65	148/18805	0.0135135135135135	3.90956340956341	2.09283401181045	0.0928718229732534	0.221367849587725	0.176749066649381	WNT5A/CTHRC1	2	PT
GO:0023061	signal release	4/65	497/18805	0.00804828973843058	2.32843213124903	1.76764121944687	0.0929198380985513	0.221367849587725	0.176749066649381	INHBA/C1QTNF3/GRP/PFN2	4	PT
GO:0061008	hepaticobiliary system development	2/65	149/18805	0.0134228187919463	3.88332472896231	2.08101126283127	0.0939328650893188	0.222526421209582	0.177674117207495	TNFAIP3/SOD2	2	PT
GO:0090090	negative regulation of canonical Wnt signaling pathway	2/65	149/18805	0.0134228187919463	3.88332472896231	2.08101126283127	0.0939328650893188	0.222526421209582	0.177674117207495	WNT5A/CTHRC1	2	PT
GO:2001235	positive regulation of apoptotic signaling pathway	2/65	149/18805	0.0134228187919463	3.88332472896231	2.08101126283127	0.0939328650893188	0.222526421209582	0.177674117207495	INHBA/WNT5A	2	PT
GO:0045785	positive regulation of cell adhesion	4/65	499/18805	0.00801603206412826	2.31909973793741	1.75884749335494	0.0939603510969925	0.222526421209582	0.177674117207495	HLA-DMA/WNT5A/PLPP3/FERMT2	4	PT
GO:0000305	response to oxygen radical	1/65	29/18805	0.0344827586206897	9.97612732095491	2.84894110355589	0.0956039439270798	0.222526421209582	0.177674117207495	SOD2	1	PT
GO:0003156	regulation of animal organ formation	1/65	29/18805	0.0344827586206897	9.97612732095491	2.84894110355589	0.0956039439270798	0.222526421209582	0.177674117207495	WNT5A	1	PT
GO:0003401	axis elongation	1/65	29/18805	0.0344827586206897	9.97612732095491	2.84894110355589	0.0956039439270798	0.222526421209582	0.177674117207495	WNT5A	1	PT
GO:0006656	phosphatidylcholine biosynthetic process	1/65	29/18805	0.0344827586206897	9.97612732095491	2.84894110355589	0.0956039439270798	0.222526421209582	0.177674117207495	FABP5	1	PT
GO:0010039	response to iron ion	1/65	29/18805	0.0344827586206897	9.97612732095491	2.84894110355589	0.0956039439270798	0.222526421209582	0.177674117207495	TFF1	1	PT
GO:0010165	response to X-ray	1/65	29/18805	0.0344827586206897	9.97612732095491	2.84894110355589	0.0956039439270798	0.222526421209582	0.177674117207495	CCND2	1	PT
GO:0021952	central nervous system projection neuron axonogenesis	1/65	29/18805	0.0344827586206897	9.97612732095491	2.84894110355589	0.0956039439270798	0.222526421209582	0.177674117207495	CDH11	1	PT
GO:0031952	regulation of protein autophosphorylation	1/65	29/18805	0.0344827586206897	9.97612732095491	2.84894110355589	0.0956039439270798	0.222526421209582	0.177674117207495	CALM2	1	PT
GO:0035872	nucleotide-binding domain, leucine rich repeat containing receptor signaling pathway	1/65	29/18805	0.0344827586206897	9.97612732095491	2.84894110355589	0.0956039439270798	0.222526421209582	0.177674117207495	TNFAIP3	1	PT
GO:0035929	steroid hormone secretion	1/65	29/18805	0.0344827586206897	9.97612732095491	2.84894110355589	0.0956039439270798	0.222526421209582	0.177674117207495	INHBA	1	PT
GO:0042403	thyroid hormone metabolic process	1/65	29/18805	0.0344827586206897	9.97612732095491	2.84894110355589	0.0956039439270798	0.222526421209582	0.177674117207495	DIO2	1	PT
GO:0042634	regulation of hair cycle	1/65	29/18805	0.0344827586206897	9.97612732095491	2.84894110355589	0.0956039439270798	0.222526421209582	0.177674117207495	WNT5A	1	PT
GO:0061744	motor behavior	1/65	29/18805	0.0344827586206897	9.97612732095491	2.84894110355589	0.0956039439270798	0.222526421209582	0.177674117207495	GRP	1	PT
GO:0090311	regulation of protein deacetylation	1/65	29/18805	0.0344827586206897	9.97612732095491	2.84894110355589	0.0956039439270798	0.222526421209582	0.177674117207495	NNMT	1	PT
GO:1902473	regulation of protein localization to synapse	1/65	29/18805	0.0344827586206897	9.97612732095491	2.84894110355589	0.0956039439270798	0.222526421209582	0.177674117207495	WNT5A	1	PT
GO:1904862	inhibitory synapse assembly	1/65	29/18805	0.0344827586206897	9.97612732095491	2.84894110355589	0.0956039439270798	0.222526421209582	0.177674117207495	WNT5A	1	PT
GO:0001890	placenta development	2/65	152/18805	0.0131578947368421	3.80668016194332	2.04614958620158	0.0971372178109412	0.225318288736719	0.179903257439689	KRT19/GJB2	2	PT
GO:0008584	male gonad development	2/65	152/18805	0.0131578947368421	3.80668016194332	2.04614958620158	0.0971372178109412	0.225318288736719	0.179903257439689	INHBA/WNT5A	2	PT
GO:0030177	positive regulation of Wnt signaling pathway	2/65	152/18805	0.0131578947368421	3.80668016194332	2.04614958620158	0.0971372178109412	0.225318288736719	0.179903257439689	TNFAIP3/WNT5A	2	PT
GO:0046546	development of primary male sexual characteristics	2/65	153/18805	0.0130718954248366	3.78179989944696	2.03472586327708	0.0982122903454403	0.226174270592723	0.180586708059999	INHBA/WNT5A	2	PT
GO:0000002	mitochondrial genome maintenance	1/65	30/18805	0.0333333333333333	9.64358974358974	2.79037007874692	0.0987348420760331	0.226174270592723	0.180586708059999	TYMP	1	PT
GO:0002507	tolerance induction	1/65	30/18805	0.0333333333333333	9.64358974358974	2.79037007874692	0.0987348420760331	0.226174270592723	0.180586708059999	TNFAIP3	1	PT
GO:0003309	type B pancreatic cell differentiation	1/65	30/18805	0.0333333333333333	9.64358974358974	2.79037007874692	0.0987348420760331	0.226174270592723	0.180586708059999	WNT5A	1	PT
GO:0032703	negative regulation of interleukin-2 production	1/65	30/18805	0.0333333333333333	9.64358974358974	2.79037007874692	0.0987348420760331	0.226174270592723	0.180586708059999	TNFAIP3	1	PT
GO:0043032	positive regulation of macrophage activation	1/65	30/18805	0.0333333333333333	9.64358974358974	2.79037007874692	0.0987348420760331	0.226174270592723	0.180586708059999	WNT5A	1	PT
GO:0060765	regulation of androgen receptor signaling pathway	1/65	30/18805	0.0333333333333333	9.64358974358974	2.79037007874692	0.0987348420760331	0.226174270592723	0.180586708059999	FOXP1	1	PT
GO:0071549	cellular response to dexamethasone stimulus	1/65	30/18805	0.0333333333333333	9.64358974358974	2.79037007874692	0.0987348420760331	0.226174270592723	0.180586708059999	GJB2	1	PT
GO:0072012	glomerulus vasculature development	1/65	30/18805	0.0333333333333333	9.64358974358974	2.79037007874692	0.0987348420760331	0.226174270592723	0.180586708059999	ACTA2	1	PT
GO:0120255	olefinic compound biosynthetic process	1/65	30/18805	0.0333333333333333	9.64358974358974	2.79037007874692	0.0987348420760331	0.226174270592723	0.180586708059999	INHBA	1	PT
GO:2000108	positive regulation of leukocyte apoptotic process	1/65	30/18805	0.0333333333333333	9.64358974358974	2.79037007874692	0.0987348420760331	0.226174270592723	0.180586708059999	WNT5A	1	PT
GO:0046879	hormone secretion	3/65	320/18805	0.009375	2.71225961538462	1.81941546433323	0.0989296641910639	0.226364485860909	0.18073858364255	INHBA/C1QTNF3/GRP	3	PT
GO:0031400	negative regulation of protein modification process	3/65	321/18805	0.00934579439252336	2.70381020848311	1.81331293108995	0.0996271561748541	0.227446438843382	0.181602458772415	TNFAIP3/CALM2/PLPP3	3	PT
GO:0051047	positive regulation of secretion	3/65	321/18805	0.00934579439252336	2.70381020848311	1.81331293108995	0.0996271561748541	0.227446438843382	0.181602458772415	INHBA/C1QTNF3/GRP	3	PT
GO:0035296	regulation of tube diameter	2/65	156/18805	0.0128205128205128	3.70907297830375	2.00102371384187	0.101457872347692	0.227907748070196	0.18197078676326	SOD2/ACTA2	2	PT
GO:0045667	regulation of osteoblast differentiation	2/65	156/18805	0.0128205128205128	3.70907297830375	2.00102371384187	0.101457872347692	0.227907748070196	0.18197078676326	CTHRC1/FERMT2	2	PT
GO:0097746	blood vessel diameter maintenance	2/65	156/18805	0.0128205128205128	3.70907297830375	2.00102371384187	0.101457872347692	0.227907748070196	0.18197078676326	SOD2/ACTA2	2	PT
GO:0006359	regulation of transcription by RNA polymerase III	1/65	31/18805	0.032258064516129	9.33250620347395	2.73448214597139	0.101855067656063	0.227907748070196	0.18197078676326	INHBA	1	PT
GO:0006783	heme biosynthetic process	1/65	31/18805	0.032258064516129	9.33250620347395	2.73448214597139	0.101855067656063	0.227907748070196	0.18197078676326	TMEM14B	1	PT
GO:0008209	androgen metabolic process	1/65	31/18805	0.032258064516129	9.33250620347395	2.73448214597139	0.101855067656063	0.227907748070196	0.18197078676326	INHBA	1	PT
GO:0019886	antigen processing and presentation of exogenous peptide antigen via MHC class II	1/65	31/18805	0.032258064516129	9.33250620347395	2.73448214597139	0.101855067656063	0.227907748070196	0.18197078676326	HLA-DMA	1	PT
GO:0031664	regulation of lipopolysaccharide-mediated signaling pathway	1/65	31/18805	0.032258064516129	9.33250620347395	2.73448214597139	0.101855067656063	0.227907748070196	0.18197078676326	TNFAIP3	1	PT
GO:0033688	regulation of osteoblast proliferation	1/65	31/18805	0.032258064516129	9.33250620347395	2.73448214597139	0.101855067656063	0.227907748070196	0.18197078676326	CTHRC1	1	PT
GO:0050951	sensory perception of temperature stimulus	1/65	31/18805	0.032258064516129	9.33250620347395	2.73448214597139	0.101855067656063	0.227907748070196	0.18197078676326	CXCR4	1	PT
GO:0051291	protein heterooligomerization	1/65	31/18805	0.032258064516129	9.33250620347395	2.73448214597139	0.101855067656063	0.227907748070196	0.18197078676326	COL1A2	1	PT
GO:0070723	response to cholesterol	1/65	31/18805	0.032258064516129	9.33250620347395	2.73448214597139	0.101855067656063	0.227907748070196	0.18197078676326	INHBA	1	PT
GO:0071295	cellular response to vitamin	1/65	31/18805	0.032258064516129	9.33250620347395	2.73448214597139	0.101855067656063	0.227907748070196	0.18197078676326	POSTN	1	PT
GO:0072525	pyridine-containing compound biosynthetic process	1/65	31/18805	0.032258064516129	9.33250620347395	2.73448214597139	0.101855067656063	0.227907748070196	0.18197078676326	NNMT	1	PT
GO:0150117	positive regulation of cell-substrate junction organization	1/65	31/18805	0.032258064516129	9.33250620347395	2.73448214597139	0.101855067656063	0.227907748070196	0.18197078676326	FERMT2	1	PT
GO:1900027	regulation of ruffle assembly	1/65	31/18805	0.032258064516129	9.33250620347395	2.73448214597139	0.101855067656063	0.227907748070196	0.18197078676326	PFN2	1	PT
GO:1900745	positive regulation of p38MAPK cascade	1/65	31/18805	0.032258064516129	9.33250620347395	2.73448214597139	0.101855067656063	0.227907748070196	0.18197078676326	SPHK1	1	PT
GO:1900746	regulation of vascular endothelial growth factor signaling pathway	1/65	31/18805	0.032258064516129	9.33250620347395	2.73448214597139	0.101855067656063	0.227907748070196	0.18197078676326	SMOC2	1	PT
GO:0021915	neural tube development	2/65	157/18805	0.0127388535031847	3.68544830965213	1.98997444645437	0.10254640330892	0.228696549229695	0.182600597591585	WNT5A/CTHRC1	2	PT
GO:0031960	response to corticosteroid	2/65	157/18805	0.0127388535031847	3.68544830965213	1.98997444645437	0.10254640330892	0.228696549229695	0.182600597591585	INHBA/GJB2	2	PT
GO:0035150	regulation of tube size	2/65	157/18805	0.0127388535031847	3.68544830965213	1.98997444645437	0.10254640330892	0.228696549229695	0.182600597591585	SOD2/ACTA2	2	PT
GO:0032682	negative regulation of chemokine production	1/65	32/18805	0.03125	9.04086538461539	2.6810687267302	0.104964656481159	0.231036336276464	0.184468778438284	C1QTNF3	1	PT
GO:0035767	endothelial cell chemotaxis	1/65	32/18805	0.03125	9.04086538461539	2.6810687267302	0.104964656481159	0.231036336276464	0.184468778438284	SMOC2	1	PT
GO:0036336	dendritic cell migration	1/65	32/18805	0.03125	9.04086538461539	2.6810687267302	0.104964656481159	0.231036336276464	0.184468778438284	CXCR4	1	PT
GO:0042219	modified amino acid catabolic process	1/65	32/18805	0.03125	9.04086538461539	2.6810687267302	0.104964656481159	0.231036336276464	0.184468778438284	ALDH1L2	1	PT
GO:0045987	positive regulation of smooth muscle contraction	1/65	32/18805	0.03125	9.04086538461539	2.6810687267302	0.104964656481159	0.231036336276464	0.184468778438284	SPHK1	1	PT
GO:0051085	chaperone cofactor-dependent protein refolding	1/65	32/18805	0.03125	9.04086538461539	2.6810687267302	0.104964656481159	0.231036336276464	0.184468778438284	HSPE1	1	PT
GO:0060603	mammary gland duct morphogenesis	1/65	32/18805	0.03125	9.04086538461539	2.6810687267302	0.104964656481159	0.231036336276464	0.184468778438284	WNT5A	1	PT
GO:0061036	positive regulation of cartilage development	1/65	32/18805	0.03125	9.04086538461539	2.6810687267302	0.104964656481159	0.231036336276464	0.184468778438284	WNT5A	1	PT
GO:0061437	renal system vasculature development	1/65	32/18805	0.03125	9.04086538461539	2.6810687267302	0.104964656481159	0.231036336276464	0.184468778438284	ACTA2	1	PT
GO:0061440	kidney vasculature development	1/65	32/18805	0.03125	9.04086538461539	2.6810687267302	0.104964656481159	0.231036336276464	0.184468778438284	ACTA2	1	PT
GO:1902042	negative regulation of extrinsic apoptotic signaling pathway via death domain receptors	1/65	32/18805	0.03125	9.04086538461539	2.6810687267302	0.104964656481159	0.231036336276464	0.184468778438284	TNFAIP3	1	PT
GO:2000649	regulation of sodium ion transmembrane transporter activity	1/65	32/18805	0.03125	9.04086538461539	2.6810687267302	0.104964656481159	0.231036336276464	0.184468778438284	GRP	1	PT
GO:0061351	neural precursor cell proliferation	2/65	160/18805	0.0125	3.61634615384615	1.95736133991595	0.105831517652697	0.232691447607721	0.185790286432987	WNT5A/TMEM14B	2	PT
GO:0009914	hormone transport	3/65	331/18805	0.00906344410876133	2.62212409946549	1.75353569207649	0.106711791537565	0.233791538034444	0.186668643233739	INHBA/C1QTNF3/GRP	3	PT
GO:0055074	calcium ion homeostasis	3/65	331/18805	0.00906344410876133	2.62212409946549	1.75353569207649	0.106711791537565	0.233791538034444	0.186668643233739	CALM2/WNT5A/CALB2	3	PT
GO:0007043	cell-cell junction assembly	2/65	161/18805	0.0124223602484472	3.59388437649307	1.94666405844064	0.106932947691162	0.233791538034444	0.186668643233739	CDH11/GJB2	2	PT
GO:0010880	regulation of release of sequestered calcium ion into cytosol by sarcoplasmic reticulum	1/65	33/18805	0.0303030303030303	8.76689976689977	2.6299434123946	0.108063644247032	0.233791538034444	0.186668643233739	CALM2	1	PT
GO:0014850	response to muscle activity	1/65	33/18805	0.0303030303030303	8.76689976689977	2.6299434123946	0.108063644247032	0.233791538034444	0.186668643233739	POSTN	1	PT
GO:0030511	positive regulation of transforming growth factor beta receptor signaling pathway	1/65	33/18805	0.0303030303030303	8.76689976689977	2.6299434123946	0.108063644247032	0.233791538034444	0.186668643233739	TGFB1I1	1	PT
GO:0040020	regulation of meiotic nuclear division	1/65	33/18805	0.0303030303030303	8.76689976689977	2.6299434123946	0.108063644247032	0.233791538034444	0.186668643233739	WNT5A	1	PT
GO:0042558	pteridine-containing compound metabolic process	1/65	33/18805	0.0303030303030303	8.76689976689977	2.6299434123946	0.108063644247032	0.233791538034444	0.186668643233739	ALDH1L2	1	PT
GO:0045648	positive regulation of erythrocyte differentiation	1/65	33/18805	0.0303030303030303	8.76689976689977	2.6299434123946	0.108063644247032	0.233791538034444	0.186668643233739	INHBA	1	PT
GO:0061384	heart trabecula morphogenesis	1/65	33/18805	0.0303030303030303	8.76689976689977	2.6299434123946	0.108063644247032	0.233791538034444	0.186668643233739	FHL2	1	PT
GO:0071634	regulation of transforming growth factor beta production	1/65	33/18805	0.0303030303030303	8.76689976689977	2.6299434123946	0.108063644247032	0.233791538034444	0.186668643233739	LUM	1	PT
GO:0090162	establishment of epithelial cell polarity	1/65	33/18805	0.0303030303030303	8.76689976689977	2.6299434123946	0.108063644247032	0.233791538034444	0.186668643233739	WNT5A	1	PT
GO:0099170	postsynaptic modulation of chemical synaptic transmission	1/65	33/18805	0.0303030303030303	8.76689976689977	2.6299434123946	0.108063644247032	0.233791538034444	0.186668643233739	WNT5A	1	PT
GO:1902547	regulation of cellular response to vascular endothelial growth factor stimulus	1/65	33/18805	0.0303030303030303	8.76689976689977	2.6299434123946	0.108063644247032	0.233791538034444	0.186668643233739	SMOC2	1	PT
GO:1903846	positive regulation of cellular response to transforming growth factor beta stimulus	1/65	33/18805	0.0303030303030303	8.76689976689977	2.6299434123946	0.108063644247032	0.233791538034444	0.186668643233739	TGFB1I1	1	PT
GO:0008277	regulation of G protein-coupled receptor signaling pathway	2/65	163/18805	0.0122699386503067	3.54978763567721	1.92552236581249	0.1091451902686	0.235627942744046	0.1881349032124	GRP/RGS4	2	PT
GO:0050729	positive regulation of inflammatory response	2/65	163/18805	0.0122699386503067	3.54978763567721	1.92552236581249	0.1091451902686	0.235627942744046	0.1881349032124	FABP4/WNT5A	2	PT
GO:0022409	positive regulation of cell-cell adhesion	3/65	337/18805	0.00890207715133531	2.57543939739785	1.7187144392545	0.111056139022499	0.237643495594144	0.189744202330139	HLA-DMA/WNT5A/PLPP3	3	PT
GO:0009112	nucleobase metabolic process	1/65	34/18805	0.0294117647058824	8.50904977375566	2.58093901686347	0.111152066531495	0.237643495594144	0.189744202330139	TYMP	1	PT
GO:0010464	regulation of mesenchymal cell proliferation	1/65	34/18805	0.0294117647058824	8.50904977375566	2.58093901686347	0.111152066531495	0.237643495594144	0.189744202330139	WNT5A	1	PT
GO:0030517	negative regulation of axon extension	1/65	34/18805	0.0294117647058824	8.50904977375566	2.58093901686347	0.111152066531495	0.237643495594144	0.189744202330139	WNT5A	1	PT
GO:0045939	negative regulation of steroid metabolic process	1/65	34/18805	0.0294117647058824	8.50904977375566	2.58093901686347	0.111152066531495	0.237643495594144	0.189744202330139	CH25H	1	PT
GO:0060914	heart formation	1/65	34/18805	0.0294117647058824	8.50904977375566	2.58093901686347	0.111152066531495	0.237643495594144	0.189744202330139	WNT5A	1	PT
GO:0090151	establishment of protein localization to mitochondrial membrane	1/65	34/18805	0.0294117647058824	8.50904977375566	2.58093901686347	0.111152066531495	0.237643495594144	0.189744202330139	NDUFA13	1	PT
GO:1901889	negative regulation of cell junction assembly	1/65	34/18805	0.0294117647058824	8.50904977375566	2.58093901686347	0.111152066531495	0.237643495594144	0.189744202330139	WNT5A	1	PT
GO:0010976	positive regulation of neuron projection development	2/65	165/18805	0.0121212121212121	3.50675990675991	1.90470957216877	0.11136971719449	0.237643495594144	0.189744202330139	WNT5A/CNTN1	2	PT
GO:0120254	olefinic compound metabolic process	2/65	165/18805	0.0121212121212121	3.50675990675991	1.90470957216877	0.11136971719449	0.237643495594144	0.189744202330139	INHBA/CTHRC1	2	PT
GO:2001236	regulation of extrinsic apoptotic signaling pathway	2/65	165/18805	0.0121212121212121	3.50675990675991	1.90470957216877	0.11136971719449	0.237643495594144	0.189744202330139	TNFAIP3/INHBA	2	PT
GO:0048545	response to steroid hormone	3/65	338/18805	0.00887573964497041	2.56781975421029	1.71298402968783	0.111786858838489	0.237979080822605	0.190012147183117	INHBA/GJB2/FOXP1	3	PT
GO:0030307	positive regulation of cell growth	2/65	166/18805	0.0120481927710843	3.48563484708063	1.89442351118802	0.112486503380796	0.237979080822605	0.190012147183117	CXCR4/SPHK1	2	PT
GO:0051017	actin filament bundle assembly	2/65	166/18805	0.0120481927710843	3.48563484708063	1.89442351118802	0.112486503380796	0.237979080822605	0.190012147183117	PFN2/FERMT2	2	PT
GO:0048872	homeostasis of number of cells	3/65	339/18805	0.00884955752212389	2.56024506466984	1.70727412096538	0.11251946029941	0.237979080822605	0.190012147183117	TNFAIP3/INHBA/TSC22D3	3	PT
GO:0001893	maternal placenta development	1/65	35/18805	0.0285714285714286	8.26593406593406	2.53390509488479	0.114229958794851	0.237979080822605	0.190012147183117	GJB2	1	PT
GO:0002495	antigen processing and presentation of peptide antigen via MHC class II	1/65	35/18805	0.0285714285714286	8.26593406593406	2.53390509488479	0.114229958794851	0.237979080822605	0.190012147183117	HLA-DMA	1	PT
GO:0006779	porphyrin-containing compound biosynthetic process	1/65	35/18805	0.0285714285714286	8.26593406593406	2.53390509488479	0.114229958794851	0.237979080822605	0.190012147183117	TMEM14B	1	PT
GO:0006882	intracellular zinc ion homeostasis	1/65	35/18805	0.0285714285714286	8.26593406593406	2.53390509488479	0.114229958794851	0.237979080822605	0.190012147183117	MT1X	1	PT
GO:0007212	G protein-coupled dopamine receptor signaling pathway	1/65	35/18805	0.0285714285714286	8.26593406593406	2.53390509488479	0.114229958794851	0.237979080822605	0.190012147183117	RGS4	1	PT
GO:0021772	olfactory bulb development	1/65	35/18805	0.0285714285714286	8.26593406593406	2.53390509488479	0.114229958794851	0.237979080822605	0.190012147183117	WNT5A	1	PT
GO:0031338	regulation of vesicle fusion	1/65	35/18805	0.0285714285714286	8.26593406593406	2.53390509488479	0.114229958794851	0.237979080822605	0.190012147183117	SPHK1	1	PT
GO:0033014	tetrapyrrole biosynthetic process	1/65	35/18805	0.0285714285714286	8.26593406593406	2.53390509488479	0.114229958794851	0.237979080822605	0.190012147183117	TMEM14B	1	PT
GO:0034249	negative regulation of amide metabolic process	1/65	35/18805	0.0285714285714286	8.26593406593406	2.53390509488479	0.114229958794851	0.237979080822605	0.190012147183117	SPHK1	1	PT
GO:0035456	response to interferon-beta	1/65	35/18805	0.0285714285714286	8.26593406593406	2.53390509488479	0.114229958794851	0.237979080822605	0.190012147183117	NDUFA13	1	PT
GO:0048147	negative regulation of fibroblast proliferation	1/65	35/18805	0.0285714285714286	8.26593406593406	2.53390509488479	0.114229958794851	0.237979080822605	0.190012147183117	SOD2	1	PT
GO:0048333	mesodermal cell differentiation	1/65	35/18805	0.0285714285714286	8.26593406593406	2.53390509488479	0.114229958794851	0.237979080822605	0.190012147183117	INHBA	1	PT
GO:0050931	pigment cell differentiation	1/65	35/18805	0.0285714285714286	8.26593406593406	2.53390509488479	0.114229958794851	0.237979080822605	0.190012147183117	SOD2	1	PT
GO:0061081	positive regulation of myeloid leukocyte cytokine production involved in immune response	1/65	35/18805	0.0285714285714286	8.26593406593406	2.53390509488479	0.114229958794851	0.237979080822605	0.190012147183117	WNT5A	1	PT
GO:0098810	neurotransmitter reuptake	1/65	35/18805	0.0285714285714286	8.26593406593406	2.53390509488479	0.114229958794851	0.237979080822605	0.190012147183117	GPM6B	1	PT
GO:0099010	modification of postsynaptic structure	1/65	35/18805	0.0285714285714286	8.26593406593406	2.53390509488479	0.114229958794851	0.237979080822605	0.190012147183117	PFN2	1	PT
GO:1902176	negative regulation of oxidative stress-induced intrinsic apoptotic signaling pathway	1/65	35/18805	0.0285714285714286	8.26593406593406	2.53390509488479	0.114229958794851	0.237979080822605	0.190012147183117	SOD2	1	PT
GO:2000406	positive regulation of T cell migration	1/65	35/18805	0.0285714285714286	8.26593406593406	2.53390509488479	0.114229958794851	0.237979080822605	0.190012147183117	WNT5A	1	PT
GO:2000463	positive regulation of excitatory postsynaptic potential	1/65	35/18805	0.0285714285714286	8.26593406593406	2.53390509488479	0.114229958794851	0.237979080822605	0.190012147183117	RGS4	1	PT
GO:0032412	regulation of monoatomic ion transmembrane transporter activity	2/65	168/18805	0.0119047619047619	3.44413919413919	1.87408627451499	0.114728955035248	0.238527858261168	0.190450313340691	CALM2/GRP	2	PT
GO:0048592	eye morphogenesis	2/65	168/18805	0.0119047619047619	3.44413919413919	1.87408627451499	0.114728955035248	0.238527858261168	0.190450313340691	WNT5A/MFAP5	2	PT
GO:0019216	regulation of lipid metabolic process	3/65	343/18805	0.0087463556851312	2.53038797936757	1.68463662710017	0.115468518725275	0.239201557573059	0.190988222186989	FABP5/CH25H/SPHK1	3	PT
GO:0006694	steroid biosynthetic process	2/65	169/18805	0.0118343195266272	3.42375967228038	1.8640328552401	0.115854554598898	0.239201557573059	0.190988222186989	INHBA/CH25H	2	PT
GO:0007584	response to nutrient	2/65	169/18805	0.0118343195266272	3.42375967228038	1.8640328552401	0.115854554598898	0.239201557573059	0.190988222186989	SOD2/POSTN	2	PT
GO:0034765	regulation of monoatomic ion transmembrane transport	3/65	345/18805	0.00869565217391304	2.51571906354515	1.67343719757643	0.116954124478373	0.239201557573059	0.190988222186989	CALM2/GRP/RGS4	3	PT
GO:0006633	fatty acid biosynthetic process	2/65	170/18805	0.0117647058823529	3.40361990950226	1.85405477759681	0.116983026360405	0.239201557573059	0.190988222186989	CTHRC1/FABP5	2	PT
GO:0061572	actin filament bundle organization	2/65	170/18805	0.0117647058823529	3.40361990950226	1.85405477759681	0.116983026360405	0.239201557573059	0.190988222186989	PFN2/FERMT2	2	PT
GO:0001782	B cell homeostasis	1/65	36/18805	0.0277777777777778	8.03632478632479	2.48870584147017	0.117297356380271	0.239201557573059	0.190988222186989	TNFAIP3	1	PT
GO:0001975	response to amphetamine	1/65	36/18805	0.0277777777777778	8.03632478632479	2.48870584147017	0.117297356380271	0.239201557573059	0.190988222186989	RGS4	1	PT
GO:0010765	positive regulation of sodium ion transport	1/65	36/18805	0.0277777777777778	8.03632478632479	2.48870584147017	0.117297356380271	0.239201557573059	0.190988222186989	CNTN1	1	PT
GO:0021884	forebrain neuron development	1/65	36/18805	0.0277777777777778	8.03632478632479	2.48870584147017	0.117297356380271	0.239201557573059	0.190988222186989	WNT5A	1	PT
GO:0030224	monocyte differentiation	1/65	36/18805	0.0277777777777778	8.03632478632479	2.48870584147017	0.117297356380271	0.239201557573059	0.190988222186989	FOXP1	1	PT
GO:0033687	osteoblast proliferation	1/65	36/18805	0.0277777777777778	8.03632478632479	2.48870584147017	0.117297356380271	0.239201557573059	0.190988222186989	CTHRC1	1	PT
GO:0034143	regulation of toll-like receptor 4 signaling pathway	1/65	36/18805	0.0277777777777778	8.03632478632479	2.48870584147017	0.117297356380271	0.239201557573059	0.190988222186989	TNFAIP3	1	PT
GO:0036314	response to sterol	1/65	36/18805	0.0277777777777778	8.03632478632479	2.48870584147017	0.117297356380271	0.239201557573059	0.190988222186989	INHBA	1	PT
GO:0045577	regulation of B cell differentiation	1/65	36/18805	0.0277777777777778	8.03632478632479	2.48870584147017	0.117297356380271	0.239201557573059	0.190988222186989	INHBA	1	PT
GO:0071604	transforming growth factor beta production	1/65	36/18805	0.0277777777777778	8.03632478632479	2.48870584147017	0.117297356380271	0.239201557573059	0.190988222186989	LUM	1	PT
GO:0140058	neuron projection arborization	1/65	36/18805	0.0277777777777778	8.03632478632479	2.48870584147017	0.117297356380271	0.239201557573059	0.190988222186989	WNT5A	1	PT
GO:1900117	regulation of execution phase of apoptosis	1/65	36/18805	0.0277777777777778	8.03632478632479	2.48870584147017	0.117297356380271	0.239201557573059	0.190988222186989	NDUFA13	1	PT
GO:2000352	negative regulation of endothelial cell apoptotic process	1/65	36/18805	0.0277777777777778	8.03632478632479	2.48870584147017	0.117297356380271	0.239201557573059	0.190988222186989	TNFAIP3	1	PT
GO:0003205	cardiac chamber development	2/65	172/18805	0.0116279069767442	3.36404293381038	1.83432040572464	0.119248456706161	0.241605882556325	0.192907932738929	WNT5A/FHL2	2	PT
GO:0002504	antigen processing and presentation of peptide or polysaccharide antigen via MHC class II	1/65	37/18805	0.027027027027027	7.81912681912682	2.44521830507804	0.120354294514177	0.241605882556325	0.192907932738929	HLA-DMA	1	PT
GO:0003230	cardiac atrium development	1/65	37/18805	0.027027027027027	7.81912681912682	2.44521830507804	0.120354294514177	0.241605882556325	0.192907932738929	WNT5A	1	PT
GO:0010092	specification of animal organ identity	1/65	37/18805	0.027027027027027	7.81912681912682	2.44521830507804	0.120354294514177	0.241605882556325	0.192907932738929	WNT5A	1	PT
GO:0021955	central nervous system neuron axonogenesis	1/65	37/18805	0.027027027027027	7.81912681912682	2.44521830507804	0.120354294514177	0.241605882556325	0.192907932738929	CDH11	1	PT
GO:0021988	olfactory lobe development	1/65	37/18805	0.027027027027027	7.81912681912682	2.44521830507804	0.120354294514177	0.241605882556325	0.192907932738929	WNT5A	1	PT
GO:0031076	embryonic camera-type eye development	1/65	37/18805	0.027027027027027	7.81912681912682	2.44521830507804	0.120354294514177	0.241605882556325	0.192907932738929	WNT5A	1	PT
GO:0032781	positive regulation of ATP-dependent activity	1/65	37/18805	0.027027027027027	7.81912681912682	2.44521830507804	0.120354294514177	0.241605882556325	0.192907932738929	PFN2	1	PT
GO:0033144	negative regulation of intracellular steroid hormone receptor signaling pathway	1/65	37/18805	0.027027027027027	7.81912681912682	2.44521830507804	0.120354294514177	0.241605882556325	0.192907932738929	FOXP1	1	PT
GO:0035883	enteroendocrine cell differentiation	1/65	37/18805	0.027027027027027	7.81912681912682	2.44521830507804	0.120354294514177	0.241605882556325	0.192907932738929	WNT5A	1	PT
GO:0051385	response to mineralocorticoid	1/65	37/18805	0.027027027027027	7.81912681912682	2.44521830507804	0.120354294514177	0.241605882556325	0.192907932738929	INHBA	1	PT
GO:0071425	hematopoietic stem cell proliferation	1/65	37/18805	0.027027027027027	7.81912681912682	2.44521830507804	0.120354294514177	0.241605882556325	0.192907932738929	WNT5A	1	PT
GO:0097484	dendrite extension	1/65	37/18805	0.027027027027027	7.81912681912682	2.44521830507804	0.120354294514177	0.241605882556325	0.192907932738929	CXCR4	1	PT
GO:1904385	cellular response to angiotensin	1/65	37/18805	0.027027027027027	7.81912681912682	2.44521830507804	0.120354294514177	0.241605882556325	0.192907932738929	INHBA	1	PT
GO:0006665	sphingolipid metabolic process	2/65	173/18805	0.0115606936416185	3.34459759893286	1.82456204366493	0.120385350863867	0.241605882556325	0.192907932738929	PLPP3/SPHK1	2	PT
GO:0051250	negative regulation of lymphocyte activation	2/65	173/18805	0.0115606936416185	3.34459759893286	1.82456204366493	0.120385350863867	0.241605882556325	0.192907932738929	TNFAIP3/INHBA	2	PT
GO:0016042	lipid catabolic process	3/65	350/18805	0.00857142857142857	2.47978021978022	1.64577788231502	0.120699916387556	0.241997357113664	0.193220501898161	ALDH1L2/PLPP3/SPHK1	3	PT
GO:0006937	regulation of muscle contraction	2/65	175/18805	0.0114285714285714	3.30637362637363	1.80525795077189	0.122667337450289	0.244986898844025	0.195607473229069	CALM2/SPHK1	2	PT
GO:0071897	DNA biosynthetic process	2/65	175/18805	0.0114285714285714	3.30637362637363	1.80525795077189	0.122667337450289	0.244986898844025	0.195607473229069	SPHK1/SMOC2	2	PT
GO:0001580	detection of chemical stimulus involved in sensory perception of bitter taste	1/65	38/18805	0.0263157894736842	7.61336032388664	2.40333086060641	0.12340080830662	0.244986898844025	0.195607473229069	PIP	1	PT
GO:0007616	long-term memory	1/65	38/18805	0.0263157894736842	7.61336032388664	2.40333086060641	0.12340080830662	0.244986898844025	0.195607473229069	CCND2	1	PT
GO:0010742	macrophage derived foam cell differentiation	1/65	38/18805	0.0263157894736842	7.61336032388664	2.40333086060641	0.12340080830662	0.244986898844025	0.195607473229069	WNT5A	1	PT
GO:0010934	macrophage cytokine production	1/65	38/18805	0.0263157894736842	7.61336032388664	2.40333086060641	0.12340080830662	0.244986898844025	0.195607473229069	WNT5A	1	PT
GO:0010935	regulation of macrophage cytokine production	1/65	38/18805	0.0263157894736842	7.61336032388664	2.40333086060641	0.12340080830662	0.244986898844025	0.195607473229069	WNT5A	1	PT
GO:0014808	release of sequestered calcium ion into cytosol by sarcoplasmic reticulum	1/65	38/18805	0.0263157894736842	7.61336032388664	2.40333086060641	0.12340080830662	0.244986898844025	0.195607473229069	CALM2	1	PT
GO:0043506	regulation of JUN kinase activity	1/65	38/18805	0.0263157894736842	7.61336032388664	2.40333086060641	0.12340080830662	0.244986898844025	0.195607473229069	WNT5A	1	PT
GO:0048854	brain morphogenesis	1/65	38/18805	0.0263157894736842	7.61336032388664	2.40333086060641	0.12340080830662	0.244986898844025	0.195607473229069	WNT5A	1	PT
GO:0022898	regulation of transmembrane transporter activity	2/65	176/18805	0.0113636363636364	3.28758741258741	1.79571027237169	0.123812366543086	0.245083130253909	0.195684308288501	CALM2/GRP	2	PT
GO:0046661	male sex differentiation	2/65	176/18805	0.0113636363636364	3.28758741258741	1.79571027237169	0.123812366543086	0.245083130253909	0.195684308288501	INHBA/WNT5A	2	PT
GO:0051701	biological process involved in interaction with host	2/65	176/18805	0.0113636363636364	3.28758741258741	1.79571027237169	0.123812366543086	0.245083130253909	0.195684308288501	CXCR4/CH25H	2	PT
GO:0030216	keratinocyte differentiation	2/65	177/18805	0.0112994350282486	3.2690134724033	1.78623090593382	0.124960044245006	0.246872282532818	0.197112840010608	WNT5A/TCHH	2	PT
GO:1902905	positive regulation of supramolecular fiber organization	2/65	177/18805	0.0112994350282486	3.2690134724033	1.78623090593382	0.124960044245006	0.246872282532818	0.197112840010608	PFN2/FERMT2	2	PT
GO:0003180	aortic valve morphogenesis	1/65	39/18805	0.0256410256410256	7.4181459566075	2.36294189867123	0.12643693275166	0.248336361612136	0.198281820109807	CDH11	1	PT
GO:0045823	positive regulation of heart contraction	1/65	39/18805	0.0256410256410256	7.4181459566075	2.36294189867123	0.12643693275166	0.248336361612136	0.198281820109807	RGS4	1	PT
GO:0060122	inner ear receptor cell stereocilium organization	1/65	39/18805	0.0256410256410256	7.4181459566075	2.36294189867123	0.12643693275166	0.248336361612136	0.198281820109807	CTHRC1	1	PT
GO:0070884	regulation of calcineurin-NFAT signaling cascade	1/65	39/18805	0.0256410256410256	7.4181459566075	2.36294189867123	0.12643693275166	0.248336361612136	0.198281820109807	FHL2	1	PT
GO:0090077	foam cell differentiation	1/65	39/18805	0.0256410256410256	7.4181459566075	2.36294189867123	0.12643693275166	0.248336361612136	0.198281820109807	WNT5A	1	PT
GO:0140448	signaling receptor ligand precursor processing	1/65	39/18805	0.0256410256410256	7.4181459566075	2.36294189867123	0.12643693275166	0.248336361612136	0.198281820109807	BACE1	1	PT
GO:1901990	regulation of mitotic cell cycle phase transition	3/65	358/18805	0.00837988826815642	2.42436613665664	1.60249722379879	0.126785453544439	0.248779596344467	0.19863571669141	CCND2/INHBA/TMEM14B	3	PT
GO:0046942	carboxylic acid transport	3/65	360/18805	0.00833333333333333	2.41089743589744	1.59185817136686	0.128324166136656	0.251093449125568	0.200483190568875	FABP4/FABP5/RGS4	3	PT
GO:0019362	pyridine nucleotide metabolic process	2/65	180/18805	0.0111111111111111	3.21452991452991	1.7581934969229	0.128418657702816	0.251093449125568	0.200483190568875	ALDH1L2/NNMT	2	PT
GO:0046496	nicotinamide nucleotide metabolic process	2/65	180/18805	0.0111111111111111	3.21452991452991	1.7581934969229	0.128418657702816	0.251093449125568	0.200483190568875	ALDH1L2/NNMT	2	PT
GO:0015849	organic acid transport	3/65	361/18805	0.00831024930747922	2.40421904964841	1.5865651514168	0.129096075779491	0.251093449125568	0.200483190568875	FABP4/FABP5/RGS4	3	PT
GO:0001953	negative regulation of cell-matrix adhesion	1/65	40/18805	0.025	7.23269230769231	2.32396	0.129462702727742	0.251093449125568	0.200483190568875	POSTN	1	PT
GO:0009303	rRNA transcription	1/65	40/18805	0.025	7.23269230769231	2.32396	0.129462702727742	0.251093449125568	0.200483190568875	CAVIN1	1	PT
GO:0035886	vascular associated smooth muscle cell differentiation	1/65	40/18805	0.025	7.23269230769231	2.32396	0.129462702727742	0.251093449125568	0.200483190568875	SOD2	1	PT
GO:0045745	positive regulation of G protein-coupled receptor signaling pathway	1/65	40/18805	0.025	7.23269230769231	2.32396	0.129462702727742	0.251093449125568	0.200483190568875	GRP	1	PT
GO:0106056	regulation of calcineurin-mediated signaling	1/65	40/18805	0.025	7.23269230769231	2.32396	0.129462702727742	0.251093449125568	0.200483190568875	FHL2	1	PT
GO:1901223	negative regulation of non-canonical NF-kappaB signal transduction	1/65	40/18805	0.025	7.23269230769231	2.32396	0.129462702727742	0.251093449125568	0.200483190568875	C1QTNF3	1	PT
GO:1903514	release of sequestered calcium ion into cytosol by endoplasmic reticulum	1/65	40/18805	0.025	7.23269230769231	2.32396	0.129462702727742	0.251093449125568	0.200483190568875	CALM2	1	PT
GO:1903524	positive regulation of blood circulation	1/65	40/18805	0.025	7.23269230769231	2.32396	0.129462702727742	0.251093449125568	0.200483190568875	RGS4	1	PT
GO:0035265	organ growth	2/65	181/18805	0.0110497237569061	3.19677008074798	1.74897828441643	0.129576619425293	0.251093449125568	0.200483190568875	RGS4/FOXP1	2	PT
GO:0017015	regulation of transforming growth factor beta receptor signaling pathway	2/65	182/18805	0.010989010989011	3.17920540997464	1.73982692296212	0.130737075432802	0.252858240450262	0.201892271517402	CILP/TGFB1I1	2	PT
GO:0031214	biomineral tissue development	2/65	182/18805	0.010989010989011	3.17920540997464	1.73982692296212	0.130737075432802	0.252858240450262	0.201892271517402	COL1A2/GPM6B	2	PT
GO:0141193	nuclear receptor-mediated signaling pathway	2/65	183/18805	0.0109289617486339	3.16183270281631	1.73073857053868	0.131899995387982	0.254502522613397	0.2032051330652	FABP5/FOXP1	2	PT
GO:0002478	antigen processing and presentation of exogenous peptide antigen	1/65	41/18805	0.024390243902439	7.0562851782364	2.28629643707299	0.132478152998069	0.254502522613397	0.2032051330652	HLA-DMA	1	PT
GO:0032965	regulation of collagen biosynthetic process	1/65	41/18805	0.024390243902439	7.0562851782364	2.28629643707299	0.132478152998069	0.254502522613397	0.2032051330652	INHBA	1	PT
GO:0050919	negative chemotaxis	1/65	41/18805	0.024390243902439	7.0562851782364	2.28629643707299	0.132478152998069	0.254502522613397	0.2032051330652	WNT5A	1	PT
GO:0060392	negative regulation of SMAD protein signal transduction	1/65	41/18805	0.024390243902439	7.0562851782364	2.28629643707299	0.132478152998069	0.254502522613397	0.2032051330652	CILP	1	PT
GO:0071542	dopaminergic neuron differentiation	1/65	41/18805	0.024390243902439	7.0562851782364	2.28629643707299	0.132478152998069	0.254502522613397	0.2032051330652	WNT5A	1	PT
GO:1904861	excitatory synapse assembly	1/65	41/18805	0.024390243902439	7.0562851782364	2.28629643707299	0.132478152998069	0.254502522613397	0.2032051330652	WNT5A	1	PT
GO:1903844	regulation of cellular response to transforming growth factor beta stimulus	2/65	185/18805	0.0108108108108108	3.12765072765073	1.71274760319922	0.134233106660694	0.254502522613397	0.2032051330652	CILP/TGFB1I1	2	PT
GO:0006066	alcohol metabolic process	3/65	368/18805	0.00815217391304348	2.35848662207358	1.54999805708493	0.134546324632042	0.254502522613397	0.2032051330652	CH25H/PLPP3/SPHK1	3	PT
GO:0045859	regulation of protein kinase activity	3/65	369/18805	0.00813008130081301	2.35209505941213	1.54484199048502	0.135331528375149	0.254502522613397	0.2032051330652	CCND2/CALM2/WNT5A	3	PT
GO:0015718	monocarboxylic acid transport	2/65	186/18805	0.010752688172043	3.11083540115798	1.70384338160974	0.135403238169857	0.254502522613397	0.2032051330652	FABP4/FABP5	2	PT
GO:0051495	positive regulation of cytoskeleton organization	2/65	186/18805	0.010752688172043	3.11083540115798	1.70384338160974	0.135403238169857	0.254502522613397	0.2032051330652	PFN2/FERMT2	2	PT
GO:0055088	lipid homeostasis	2/65	186/18805	0.010752688172043	3.11083540115798	1.70384338160974	0.135403238169857	0.254502522613397	0.2032051330652	FABP4/C1QTNF3	2	PT
GO:0000578	embryonic axis specification	1/65	42/18805	0.0238095238095238	6.88827838827839	2.24987736648935	0.135483318210984	0.254502522613397	0.2032051330652	WNT5A	1	PT
GO:0006476	protein deacetylation	1/65	42/18805	0.0238095238095238	6.88827838827839	2.24987736648935	0.135483318210984	0.254502522613397	0.2032051330652	NNMT	1	PT
GO:0009394	2'-deoxyribonucleotide metabolic process	1/65	42/18805	0.0238095238095238	6.88827838827839	2.24987736648935	0.135483318210984	0.254502522613397	0.2032051330652	TYMP	1	PT
GO:0010951	negative regulation of endopeptidase activity	1/65	42/18805	0.0238095238095238	6.88827838827839	2.24987736648935	0.135483318210984	0.254502522613397	0.2032051330652	TIMP3	1	PT
GO:0021983	pituitary gland development	1/65	42/18805	0.0238095238095238	6.88827838827839	2.24987736648935	0.135483318210984	0.254502522613397	0.2032051330652	WNT5A	1	PT
GO:0043903	regulation of biological process involved in symbiotic interaction	1/65	42/18805	0.0238095238095238	6.88827838827839	2.24987736648935	0.135483318210984	0.254502522613397	0.2032051330652	CH25H	1	PT
GO:0044060	regulation of endocrine process	1/65	42/18805	0.0238095238095238	6.88827838827839	2.24987736648935	0.135483318210984	0.254502522613397	0.2032051330652	INHBA	1	PT
GO:0044319	wound healing, spreading of cells	1/65	42/18805	0.0238095238095238	6.88827838827839	2.24987736648935	0.135483318210984	0.254502522613397	0.2032051330652	FERMT2	1	PT
GO:0051955	regulation of amino acid transport	1/65	42/18805	0.0238095238095238	6.88827838827839	2.24987736648935	0.135483318210984	0.254502522613397	0.2032051330652	RGS4	1	PT
GO:0060391	positive regulation of SMAD protein signal transduction	1/65	42/18805	0.0238095238095238	6.88827838827839	2.24987736648935	0.135483318210984	0.254502522613397	0.2032051330652	INHBA	1	PT
GO:0090505	epiboly involved in wound healing	1/65	42/18805	0.0238095238095238	6.88827838827839	2.24987736648935	0.135483318210984	0.254502522613397	0.2032051330652	FERMT2	1	PT
GO:0099563	modification of synaptic structure	1/65	42/18805	0.0238095238095238	6.88827838827839	2.24987736648935	0.135483318210984	0.254502522613397	0.2032051330652	PFN2	1	PT
GO:0150077	regulation of neuroinflammatory response	1/65	42/18805	0.0238095238095238	6.88827838827839	2.24987736648935	0.135483318210984	0.254502522613397	0.2032051330652	SPHK1	1	PT
GO:1903115	regulation of actin filament-based movement	1/65	42/18805	0.0238095238095238	6.88827838827839	2.24987736648935	0.135483318210984	0.254502522613397	0.2032051330652	ACTA2	1	PT
GO:1904706	negative regulation of vascular associated smooth muscle cell proliferation	1/65	42/18805	0.0238095238095238	6.88827838827839	2.24987736648935	0.135483318210984	0.254502522613397	0.2032051330652	SOD2	1	PT
GO:2000008	regulation of protein localization to cell surface	1/65	42/18805	0.0238095238095238	6.88827838827839	2.24987736648935	0.135483318210984	0.254502522613397	0.2032051330652	GPM6B	1	PT
GO:2000403	positive regulation of lymphocyte migration	1/65	42/18805	0.0238095238095238	6.88827838827839	2.24987736648935	0.135483318210984	0.254502522613397	0.2032051330652	WNT5A	1	PT
GO:2001259	positive regulation of cation channel activity	1/65	42/18805	0.0238095238095238	6.88827838827839	2.24987736648935	0.135483318210984	0.254502522613397	0.2032051330652	CALM2	1	PT
GO:0072524	pyridine-containing compound metabolic process	2/65	187/18805	0.0106951871657754	3.09419991772933	1.69499895497604	0.136575714008352	0.256316794130595	0.204653721005637	ALDH1L2/NNMT	2	PT
GO:0031345	negative regulation of cell projection organization	2/65	188/18805	0.0106382978723404	3.07774140752864	1.68621355646064	0.137750504700349	0.256323968576945	0.204659449374496	WNT5A/PFN2	2	PT
GO:0001662	behavioral fear response	1/65	43/18805	0.0232558139534884	6.72808586762075	2.21463004733667	0.138478232900334	0.256323968576945	0.204659449374496	GRP	1	PT
GO:0009262	deoxyribonucleotide metabolic process	1/65	43/18805	0.0232558139534884	6.72808586762075	2.21463004733667	0.138478232900334	0.256323968576945	0.204659449374496	TYMP	1	PT
GO:0019692	deoxyribose phosphate metabolic process	1/65	43/18805	0.0232558139534884	6.72808586762075	2.21463004733667	0.138478232900334	0.256323968576945	0.204659449374496	TYMP	1	PT
GO:0032570	response to progesterone	1/65	43/18805	0.0232558139534884	6.72808586762075	2.21463004733667	0.138478232900334	0.256323968576945	0.204659449374496	GJB2	1	PT
GO:0043094	metabolic compound salvage	1/65	43/18805	0.0232558139534884	6.72808586762075	2.21463004733667	0.138478232900334	0.256323968576945	0.204659449374496	NNMT	1	PT
GO:0043277	apoptotic cell clearance	1/65	43/18805	0.0232558139534884	6.72808586762075	2.21463004733667	0.138478232900334	0.256323968576945	0.204659449374496	MFGE8	1	PT
GO:0044058	regulation of digestive system process	1/65	43/18805	0.0232558139534884	6.72808586762075	2.21463004733667	0.138478232900334	0.256323968576945	0.204659449374496	TYMP	1	PT
GO:0045124	regulation of bone resorption	1/65	43/18805	0.0232558139534884	6.72808586762075	2.21463004733667	0.138478232900334	0.256323968576945	0.204659449374496	TNFAIP3	1	PT
GO:0046839	phospholipid dephosphorylation	1/65	43/18805	0.0232558139534884	6.72808586762075	2.21463004733667	0.138478232900334	0.256323968576945	0.204659449374496	PLPP3	1	PT
GO:0050913	sensory perception of bitter taste	1/65	43/18805	0.0232558139534884	6.72808586762075	2.21463004733667	0.138478232900334	0.256323968576945	0.204659449374496	PIP	1	PT
GO:0051281	positive regulation of release of sequestered calcium ion into cytosol	1/65	43/18805	0.0232558139534884	6.72808586762075	2.21463004733667	0.138478232900334	0.256323968576945	0.204659449374496	CALM2	1	PT
GO:0090504	epiboly	1/65	43/18805	0.0232558139534884	6.72808586762075	2.21463004733667	0.138478232900334	0.256323968576945	0.204659449374496	FERMT2	1	PT
GO:0120033	negative regulation of plasma membrane bounded cell projection assembly	1/65	43/18805	0.0232558139534884	6.72808586762075	2.21463004733667	0.138478232900334	0.256323968576945	0.204659449374496	PFN2	1	PT
GO:1900026	positive regulation of substrate adhesion-dependent cell spreading	1/65	43/18805	0.0232558139534884	6.72808586762075	2.21463004733667	0.138478232900334	0.256323968576945	0.204659449374496	FERMT2	1	PT
GO:0048736	appendage development	2/65	190/18805	0.0105263157894737	3.04534412955466	1.66881684601099	0.140106913590286	0.258865419726578	0.206688647017556	WNT5A/FERMT2	2	PT
GO:0060173	limb development	2/65	190/18805	0.0105263157894737	3.04534412955466	1.66881684601099	0.140106913590286	0.258865419726578	0.206688647017556	WNT5A/FERMT2	2	PT
GO:0002209	behavioral defense response	1/65	44/18805	0.0227272727272727	6.57517482517482	2.18048871461274	0.141462931485852	0.259476844437364	0.207176833297357	GRP	1	PT
GO:0030501	positive regulation of bone mineralization	1/65	44/18805	0.0227272727272727	6.57517482517482	2.18048871461274	0.141462931485852	0.259476844437364	0.207176833297357	GPM6B	1	PT
GO:0032691	negative regulation of interleukin-1 beta production	1/65	44/18805	0.0227272727272727	6.57517482517482	2.18048871461274	0.141462931485852	0.259476844437364	0.207176833297357	TNFAIP3	1	PT
GO:0045429	positive regulation of nitric oxide biosynthetic process	1/65	44/18805	0.0227272727272727	6.57517482517482	2.18048871461274	0.141462931485852	0.259476844437364	0.207176833297357	SOD2	1	PT
GO:0050912	detection of chemical stimulus involved in sensory perception of taste	1/65	44/18805	0.0227272727272727	6.57517482517482	2.18048871461274	0.141462931485852	0.259476844437364	0.207176833297357	PIP	1	PT
GO:0051084	'de novo' post-translational protein folding	1/65	44/18805	0.0227272727272727	6.57517482517482	2.18048871461274	0.141462931485852	0.259476844437364	0.207176833297357	HSPE1	1	PT
GO:0070328	triglyceride homeostasis	1/65	44/18805	0.0227272727272727	6.57517482517482	2.18048871461274	0.141462931485852	0.259476844437364	0.207176833297357	C1QTNF3	1	PT
GO:0097178	ruffle assembly	1/65	44/18805	0.0227272727272727	6.57517482517482	2.18048871461274	0.141462931485852	0.259476844437364	0.207176833297357	PFN2	1	PT
GO:0048771	tissue remodeling	2/65	192/18805	0.0104166666666667	3.01362179487179	1.65164738933304	0.142472232416967	0.2609151050436	0.208325198880816	TNFAIP3/CTHRC1	2	PT
GO:0061025	membrane fusion	2/65	193/18805	0.0103626943005181	2.99800717417298	1.64314610687946	0.143658161158179	0.2609151050436	0.208325198880816	CH25H/SPHK1	2	PT
GO:0003044	regulation of systemic arterial blood pressure mediated by a chemical signal	1/65	45/18805	0.0222222222222222	6.42905982905983	2.14739270711117	0.144437448273519	0.2609151050436	0.208325198880816	SOD2	1	PT
GO:0003176	aortic valve development	1/65	45/18805	0.0222222222222222	6.42905982905983	2.14739270711117	0.144437448273519	0.2609151050436	0.208325198880816	CDH11	1	PT
GO:0007007	inner mitochondrial membrane organization	1/65	45/18805	0.0222222222222222	6.42905982905983	2.14739270711117	0.144437448273519	0.2609151050436	0.208325198880816	NDUFA13	1	PT
GO:0030574	collagen catabolic process	1/65	45/18805	0.0222222222222222	6.42905982905983	2.14739270711117	0.144437448273519	0.2609151050436	0.208325198880816	MMP11	1	PT
GO:0032689	negative regulation of type II interferon production	1/65	45/18805	0.0222222222222222	6.42905982905983	2.14739270711117	0.144437448273519	0.2609151050436	0.208325198880816	INHBA	1	PT
GO:0042554	superoxide anion generation	1/65	45/18805	0.0222222222222222	6.42905982905983	2.14739270711117	0.144437448273519	0.2609151050436	0.208325198880816	SOD2	1	PT
GO:0045687	positive regulation of glial cell differentiation	1/65	45/18805	0.0222222222222222	6.42905982905983	2.14739270711117	0.144437448273519	0.2609151050436	0.208325198880816	CXCR4	1	PT
GO:0048713	regulation of oligodendrocyte differentiation	1/65	45/18805	0.0222222222222222	6.42905982905983	2.14739270711117	0.144437448273519	0.2609151050436	0.208325198880816	CXCR4	1	PT
GO:0050691	regulation of defense response to virus by host	1/65	45/18805	0.0222222222222222	6.42905982905983	2.14739270711117	0.144437448273519	0.2609151050436	0.208325198880816	TNFAIP3	1	PT
GO:0055090	acylglycerol homeostasis	1/65	45/18805	0.0222222222222222	6.42905982905983	2.14739270711117	0.144437448273519	0.2609151050436	0.208325198880816	C1QTNF3	1	PT
GO:0060338	regulation of type I interferon-mediated signaling pathway	1/65	45/18805	0.0222222222222222	6.42905982905983	2.14739270711117	0.144437448273519	0.2609151050436	0.208325198880816	WNT5A	1	PT
GO:0070296	sarcoplasmic reticulum calcium ion transport	1/65	45/18805	0.0222222222222222	6.42905982905983	2.14739270711117	0.144437448273519	0.2609151050436	0.208325198880816	CALM2	1	PT
GO:1901016	regulation of potassium ion transmembrane transporter activity	1/65	45/18805	0.0222222222222222	6.42905982905983	2.14739270711117	0.144437448273519	0.2609151050436	0.208325198880816	GRP	1	PT
GO:1904407	positive regulation of nitric oxide metabolic process	1/65	45/18805	0.0222222222222222	6.42905982905983	2.14739270711117	0.144437448273519	0.2609151050436	0.208325198880816	SOD2	1	PT
GO:1990776	response to angiotensin	1/65	45/18805	0.0222222222222222	6.42905982905983	2.14739270711117	0.144437448273519	0.2609151050436	0.208325198880816	INHBA	1	PT
GO:0006941	striated muscle contraction	2/65	194/18805	0.0103092783505155	2.98255352894528	1.63469953394653	0.144846231438387	0.261187550011339	0.208542729989561	CXCR4/CALM2	2	PT
GO:0030258	lipid modification	2/65	194/18805	0.0103092783505155	2.98255352894528	1.63469953394653	0.144846231438387	0.261187550011339	0.208542729989561	ALDH1L2/PLPP3	2	PT
GO:0001504	neurotransmitter uptake	1/65	46/18805	0.0217391304347826	6.28929765886288	2.1152859675578	0.14740181745594	0.262754120024893	0.20979354300623	GPM6B	1	PT
GO:0006739	NADP metabolic process	1/65	46/18805	0.0217391304347826	6.28929765886288	2.1152859675578	0.14740181745594	0.262754120024893	0.20979354300623	ALDH1L2	1	PT
GO:0010463	mesenchymal cell proliferation	1/65	46/18805	0.0217391304347826	6.28929765886288	2.1152859675578	0.14740181745594	0.262754120024893	0.20979354300623	WNT5A	1	PT
GO:0010712	regulation of collagen metabolic process	1/65	46/18805	0.0217391304347826	6.28929765886288	2.1152859675578	0.14740181745594	0.262754120024893	0.20979354300623	INHBA	1	PT
GO:0021762	substantia nigra development	1/65	46/18805	0.0217391304347826	6.28929765886288	2.1152859675578	0.14740181745594	0.262754120024893	0.20979354300623	CALM2	1	PT
GO:0031018	endocrine pancreas development	1/65	46/18805	0.0217391304347826	6.28929765886288	2.1152859675578	0.14740181745594	0.262754120024893	0.20979354300623	WNT5A	1	PT
GO:0033574	response to testosterone	1/65	46/18805	0.0217391304347826	6.28929765886288	2.1152859675578	0.14740181745594	0.262754120024893	0.20979354300623	FOXP1	1	PT
GO:0045646	regulation of erythrocyte differentiation	1/65	46/18805	0.0217391304347826	6.28929765886288	2.1152859675578	0.14740181745594	0.262754120024893	0.20979354300623	INHBA	1	PT
GO:0060443	mammary gland morphogenesis	1/65	46/18805	0.0217391304347826	6.28929765886288	2.1152859675578	0.14740181745594	0.262754120024893	0.20979354300623	WNT5A	1	PT
GO:1900744	regulation of p38MAPK cascade	1/65	46/18805	0.0217391304347826	6.28929765886288	2.1152859675578	0.14740181745594	0.262754120024893	0.20979354300623	SPHK1	1	PT
GO:1904646	cellular response to amyloid-beta	1/65	46/18805	0.0217391304347826	6.28929765886288	2.1152859675578	0.14740181745594	0.262754120024893	0.20979354300623	BACE1	1	PT
GO:1990000	amyloid fibril formation	1/65	46/18805	0.0217391304347826	6.28929765886288	2.1152859675578	0.14740181745594	0.262754120024893	0.20979354300623	BACE1	1	PT
GO:2001239	regulation of extrinsic apoptotic signaling pathway in absence of ligand	1/65	46/18805	0.0217391304347826	6.28929765886288	2.1152859675578	0.14740181745594	0.262754120024893	0.20979354300623	INHBA	1	PT
GO:0006164	purine nucleotide biosynthetic process	2/65	198/18805	0.0101010101010101	2.92229992229992	1.60144700286389	0.149619364351312	0.266146021025559	0.212501774292532	NDUFA13/NNMT	2	PT
GO:0002920	regulation of humoral immune response	1/65	47/18805	0.0212765957446809	6.15548281505728	2.08411660139709	0.150356073112711	0.266146021025559	0.212501774292532	CD59	1	PT
GO:0031641	regulation of myelination	1/65	47/18805	0.0212765957446809	6.15548281505728	2.08411660139709	0.150356073112711	0.266146021025559	0.212501774292532	TYMP	1	PT
GO:0033173	calcineurin-NFAT signaling cascade	1/65	47/18805	0.0212765957446809	6.15548281505728	2.08411660139709	0.150356073112711	0.266146021025559	0.212501774292532	FHL2	1	PT
GO:0042168	heme metabolic process	1/65	47/18805	0.0212765957446809	6.15548281505728	2.08411660139709	0.150356073112711	0.266146021025559	0.212501774292532	TMEM14B	1	PT
GO:0045840	positive regulation of mitotic nuclear division	1/65	47/18805	0.0212765957446809	6.15548281505728	2.08411660139709	0.150356073112711	0.266146021025559	0.212501774292532	SPHK1	1	PT
GO:0071548	response to dexamethasone	1/65	47/18805	0.0212765957446809	6.15548281505728	2.08411660139709	0.150356073112711	0.266146021025559	0.212501774292532	GJB2	1	PT
GO:1903426	regulation of reactive oxygen species biosynthetic process	1/65	47/18805	0.0212765957446809	6.15548281505728	2.08411660139709	0.150356073112711	0.266146021025559	0.212501774292532	SOD2	1	PT
GO:0046890	regulation of lipid biosynthetic process	2/65	199/18805	0.0100502512562814	2.90761499806726	1.59326407768605	0.15081772105884	0.266730030693582	0.212968071290626	FABP5/SPHK1	2	PT
GO:0001818	negative regulation of cytokine production	3/65	389/18805	0.0077120822622108	2.23116472216729	1.4450747630683	0.151365467416075	0.267465158392279	0.213555027051613	TNFAIP3/INHBA/C1QTNF3	3	PT
GO:0031396	regulation of protein ubiquitination	2/65	201/18805	0.00995024875621891	2.87868350554918	1.57705010608796	0.153220329662773	0.268308560632532	0.214228433596657	TNFAIP3/SPHK1	2	PT
GO:0016339	calcium-dependent cell-cell adhesion via plasma membrane cell adhesion molecules	1/65	48/18805	0.0208333333333333	6.02724358974359	2.05383648625893	0.153300249210785	0.268308560632532	0.214228433596657	CDH11	1	PT
GO:0019674	NAD metabolic process	1/65	48/18805	0.0208333333333333	6.02724358974359	2.05383648625893	0.153300249210785	0.268308560632532	0.214228433596657	NNMT	1	PT
GO:0033138	positive regulation of peptidyl-serine phosphorylation	1/65	48/18805	0.0208333333333333	6.02724358974359	2.05383648625893	0.153300249210785	0.268308560632532	0.214228433596657	PFN2	1	PT
GO:0048066	developmental pigmentation	1/65	48/18805	0.0208333333333333	6.02724358974359	2.05383648625893	0.153300249210785	0.268308560632532	0.214228433596657	SOD2	1	PT
GO:0048806	genitalia development	1/65	48/18805	0.0208333333333333	6.02724358974359	2.05383648625893	0.153300249210785	0.268308560632532	0.214228433596657	WNT5A	1	PT
GO:0061383	trabecula morphogenesis	1/65	48/18805	0.0208333333333333	6.02724358974359	2.05383648625893	0.153300249210785	0.268308560632532	0.214228433596657	FHL2	1	PT
GO:0099054	presynapse assembly	1/65	48/18805	0.0208333333333333	6.02724358974359	2.05383648625893	0.153300249210785	0.268308560632532	0.214228433596657	WNT5A	1	PT
GO:1900271	regulation of long-term synaptic potentiation	1/65	48/18805	0.0208333333333333	6.02724358974359	2.05383648625893	0.153300249210785	0.268308560632532	0.214228433596657	CALB2	1	PT
GO:1902175	regulation of oxidative stress-induced intrinsic apoptotic signaling pathway	1/65	48/18805	0.0208333333333333	6.02724358974359	2.05383648625893	0.153300249210785	0.268308560632532	0.214228433596657	SOD2	1	PT
GO:2000300	regulation of synaptic vesicle exocytosis	1/65	48/18805	0.0208333333333333	6.02724358974359	2.05383648625893	0.153300249210785	0.268308560632532	0.214228433596657	PFN2	1	PT
GO:0050867	positive regulation of cell activation	3/65	392/18805	0.0076530612244898	2.21408948194662	1.4306337291847	0.153822428946516	0.268989998805436	0.214772521463366	ACTA2/HLA-DMA/WNT5A	3	PT
GO:0032409	regulation of transporter activity	2/65	202/18805	0.0099009900990099	2.86443259710586	1.56901785358588	0.154424527063338	0.269354756484207	0.215063758783492	CALM2/GRP	2	PT
GO:0030522	intracellular receptor signaling pathway	3/65	393/18805	0.00763358778625954	2.20845566647093	1.42584895228935	0.154644288574499	0.269354756484207	0.215063758783492	TNFAIP3/FABP5/FOXP1	3	PT
GO:0031099	regeneration	2/65	203/18805	0.00985221674876847	2.8503220917014	1.56103463627115	0.155630617131436	0.269354756484207	0.215063758783492	NNMT/POSTN	2	PT
GO:0006458	'de novo' protein folding	1/65	49/18805	0.0204081632653061	5.90423861852433	2.02440092536119	0.15623437960484	0.269354756484207	0.215063758783492	HSPE1	1	PT
GO:0030850	prostate gland development	1/65	49/18805	0.0204081632653061	5.90423861852433	2.02440092536119	0.15623437960484	0.269354756484207	0.215063758783492	WNT5A	1	PT
GO:0032620	interleukin-17 production	1/65	49/18805	0.0204081632653061	5.90423861852433	2.02440092536119	0.15623437960484	0.269354756484207	0.215063758783492	SPHK1	1	PT
GO:0032660	regulation of interleukin-17 production	1/65	49/18805	0.0204081632653061	5.90423861852433	2.02440092536119	0.15623437960484	0.269354756484207	0.215063758783492	SPHK1	1	PT
GO:0042596	fear response	1/65	49/18805	0.0204081632653061	5.90423861852433	2.02440092536119	0.15623437960484	0.269354756484207	0.215063758783492	GRP	1	PT
GO:0043029	T cell homeostasis	1/65	49/18805	0.0204081632653061	5.90423861852433	2.02440092536119	0.15623437960484	0.269354756484207	0.215063758783492	TSC22D3	1	PT
GO:0045197	establishment or maintenance of epithelial cell apical/basal polarity	1/65	49/18805	0.0204081632653061	5.90423861852433	2.02440092536119	0.15623437960484	0.269354756484207	0.215063758783492	WNT5A	1	PT
GO:0046189	phenol-containing compound biosynthetic process	1/65	49/18805	0.0204081632653061	5.90423861852433	2.02440092536119	0.15623437960484	0.269354756484207	0.215063758783492	WNT5A	1	PT
GO:0048546	digestive tract morphogenesis	1/65	49/18805	0.0204081632653061	5.90423861852433	2.02440092536119	0.15623437960484	0.269354756484207	0.215063758783492	WNT5A	1	PT
GO:0090181	regulation of cholesterol metabolic process	1/65	49/18805	0.0204081632653061	5.90423861852433	2.02440092536119	0.15623437960484	0.269354756484207	0.215063758783492	CH25H	1	PT
GO:1902041	regulation of extrinsic apoptotic signaling pathway via death domain receptors	1/65	49/18805	0.0204081632653061	5.90423861852433	2.02440092536119	0.15623437960484	0.269354756484207	0.215063758783492	TNFAIP3	1	PT
GO:1903170	negative regulation of calcium ion transmembrane transport	1/65	49/18805	0.0204081632653061	5.90423861852433	2.02440092536119	0.15623437960484	0.269354756484207	0.215063758783492	CALM2	1	PT
GO:1905314	semi-lunar valve development	1/65	49/18805	0.0204081632653061	5.90423861852433	2.02440092536119	0.15623437960484	0.269354756484207	0.215063758783492	CDH11	1	PT
GO:0050900	leukocyte migration	3/65	395/18805	0.00759493670886076	2.19727361246349	1.41632222690429	0.15629226610812	0.269354756484207	0.215063758783492	CXCR4/WNT5A/CH25H	3	PT
GO:0002695	negative regulation of leukocyte activation	2/65	204/18805	0.00980392156862745	2.83634992458522	1.55309987633334	0.156838573016573	0.270066420372925	0.215631980087232	TNFAIP3/INHBA	2	PT
GO:1902903	regulation of supramolecular fiber organization	3/65	396/18805	0.00757575757575758	2.19172494172494	1.41158010665561	0.157118367222955	0.270101717451707	0.21566016270608	RGS4/PFN2/FERMT2	3	PT
GO:0043549	regulation of kinase activity	3/65	397/18805	0.00755667506297229	2.1862042239876	1.40685203476426	0.157945865380711	0.270101717451707	0.21566016270608	CCND2/CALM2/WNT5A	3	PT
GO:0031334	positive regulation of protein-containing complex assembly	2/65	205/18805	0.00975609756097561	2.82251407129456	1.54521300566008	0.15804836802588	0.270101717451707	0.21566016270608	PFN2/FERMT2	2	PT
GO:2000241	regulation of reproductive process	2/65	205/18805	0.00975609756097561	2.82251407129456	1.54521300566008	0.15804836802588	0.270101717451707	0.21566016270608	INHBA/WNT5A	2	PT
GO:0001774	microglial cell activation	1/65	50/18805	0.02	5.78615384615385	1.99576833911859	0.159158498037645	0.270101717451707	0.21566016270608	SPHK1	1	PT
GO:0010907	positive regulation of glucose metabolic process	1/65	50/18805	0.02	5.78615384615385	1.99576833911859	0.159158498037645	0.270101717451707	0.21566016270608	NNMT	1	PT
GO:0019884	antigen processing and presentation of exogenous antigen	1/65	50/18805	0.02	5.78615384615385	1.99576833911859	0.159158498037645	0.270101717451707	0.21566016270608	HLA-DMA	1	PT
GO:0030521	androgen receptor signaling pathway	1/65	50/18805	0.02	5.78615384615385	1.99576833911859	0.159158498037645	0.270101717451707	0.21566016270608	FOXP1	1	PT
GO:0031670	cellular response to nutrient	1/65	50/18805	0.02	5.78615384615385	1.99576833911859	0.159158498037645	0.270101717451707	0.21566016270608	POSTN	1	PT
GO:0035601	protein deacylation	1/65	50/18805	0.02	5.78615384615385	1.99576833911859	0.159158498037645	0.270101717451707	0.21566016270608	NNMT	1	PT
GO:0035850	epithelial cell differentiation involved in kidney development	1/65	50/18805	0.02	5.78615384615385	1.99576833911859	0.159158498037645	0.270101717451707	0.21566016270608	ACTA2	1	PT
GO:0042181	ketone biosynthetic process	1/65	50/18805	0.02	5.78615384615385	1.99576833911859	0.159158498037645	0.270101717451707	0.21566016270608	INHBA	1	PT
GO:0051150	regulation of smooth muscle cell differentiation	1/65	50/18805	0.02	5.78615384615385	1.99576833911859	0.159158498037645	0.270101717451707	0.21566016270608	SOD2	1	PT
GO:0061082	myeloid leukocyte cytokine production	1/65	50/18805	0.02	5.78615384615385	1.99576833911859	0.159158498037645	0.270101717451707	0.21566016270608	WNT5A	1	PT
GO:0098815	modulation of excitatory postsynaptic potential	1/65	50/18805	0.02	5.78615384615385	1.99576833911859	0.159158498037645	0.270101717451707	0.21566016270608	RGS4	1	PT
GO:0140894	endolysosomal toll-like receptor signaling pathway	1/65	50/18805	0.02	5.78615384615385	1.99576833911859	0.159158498037645	0.270101717451707	0.21566016270608	TNFAIP3	1	PT
GO:2000404	regulation of T cell migration	1/65	50/18805	0.02	5.78615384615385	1.99576833911859	0.159158498037645	0.270101717451707	0.21566016270608	WNT5A	1	PT
GO:0090101	negative regulation of transmembrane receptor protein serine/threonine kinase signaling pathway	2/65	206/18805	0.00970873786407767	2.80881254667662	1.53737346562715	0.159259975623377	0.270101717451707	0.21566016270608	CILP/WNT5A	2	PT
GO:0016051	carbohydrate biosynthetic process	2/65	207/18805	0.00966183574879227	2.79524340393906	1.52958070689407	0.160473369429234	0.271704492553677	0.216939883333307	C1QTNF3/NNMT	2	PT
GO:0050728	negative regulation of inflammatory response	2/65	207/18805	0.00966183574879227	2.79524340393906	1.52958070689407	0.160473369429234	0.271704492553677	0.216939883333307	TNFAIP3/C1QTNF3	2	PT
GO:0006890	retrograde vesicle-mediated transport, Golgi to endoplasmic reticulum	1/65	51/18805	0.0196078431372549	5.67269984917044	1.9679	0.16207263814042	0.272815538016917	0.217826987079394	PLPP3	1	PT
GO:0014911	positive regulation of smooth muscle cell migration	1/65	51/18805	0.0196078431372549	5.67269984917044	1.9679	0.16207263814042	0.272815538016917	0.217826987079394	POSTN	1	PT
GO:0045214	sarcomere organization	1/65	51/18805	0.0196078431372549	5.67269984917044	1.9679	0.16207263814042	0.272815538016917	0.217826987079394	KRT19	1	PT
GO:0045933	positive regulation of muscle contraction	1/65	51/18805	0.0196078431372549	5.67269984917044	1.9679	0.16207263814042	0.272815538016917	0.217826987079394	SPHK1	1	PT
GO:0046850	regulation of bone remodeling	1/65	51/18805	0.0196078431372549	5.67269984917044	1.9679	0.16207263814042	0.272815538016917	0.217826987079394	TNFAIP3	1	PT
GO:0060119	inner ear receptor cell development	1/65	51/18805	0.0196078431372549	5.67269984917044	1.9679	0.16207263814042	0.272815538016917	0.217826987079394	CTHRC1	1	PT
GO:1902305	regulation of sodium ion transmembrane transport	1/65	51/18805	0.0196078431372549	5.67269984917044	1.9679	0.16207263814042	0.272815538016917	0.217826987079394	GRP	1	PT
GO:0001933	negative regulation of protein phosphorylation	2/65	210/18805	0.00952380952380952	2.75531135531136	1.50647776020306	0.164124006625536	0.275187881138583	0.219721162016303	CALM2/PLPP3	2	PT
GO:0043270	positive regulation of monoatomic ion transport	2/65	210/18805	0.00952380952380952	2.75531135531136	1.50647776020306	0.164124006625536	0.275187881138583	0.219721162016303	CALM2/CNTN1	2	PT
GO:0010466	negative regulation of peptidase activity	1/65	52/18805	0.0192307692307692	5.56360946745562	1.94075973697531	0.164976833433205	0.275187881138583	0.219721162016303	TIMP3	1	PT
GO:0030838	positive regulation of actin filament polymerization	1/65	52/18805	0.0192307692307692	5.56360946745562	1.94075973697531	0.164976833433205	0.275187881138583	0.219721162016303	PFN2	1	PT
GO:0032692	negative regulation of interleukin-1 production	1/65	52/18805	0.0192307692307692	5.56360946745562	1.94075973697531	0.164976833433205	0.275187881138583	0.219721162016303	TNFAIP3	1	PT
GO:0034331	cell junction maintenance	1/65	52/18805	0.0192307692307692	5.56360946745562	1.94075973697531	0.164976833433205	0.275187881138583	0.219721162016303	FERMT2	1	PT
GO:0035987	endodermal cell differentiation	1/65	52/18805	0.0192307692307692	5.56360946745562	1.94075973697531	0.164976833433205	0.275187881138583	0.219721162016303	INHBA	1	PT
GO:0042311	vasodilation	1/65	52/18805	0.0192307692307692	5.56360946745562	1.94075973697531	0.164976833433205	0.275187881138583	0.219721162016303	SOD2	1	PT
GO:0045776	negative regulation of blood pressure	1/65	52/18805	0.0192307692307692	5.56360946745562	1.94075973697531	0.164976833433205	0.275187881138583	0.219721162016303	SOD2	1	PT
GO:0050922	negative regulation of chemotaxis	1/65	52/18805	0.0192307692307692	5.56360946745562	1.94075973697531	0.164976833433205	0.275187881138583	0.219721162016303	WNT5A	1	PT
GO:0089718	amino acid import across plasma membrane	1/65	52/18805	0.0192307692307692	5.56360946745562	1.94075973697531	0.164976833433205	0.275187881138583	0.219721162016303	RGS4	1	PT
GO:0006836	neurotransmitter transport	2/65	211/18805	0.00947867298578199	2.74225300765585	1.4988668120832	0.16534428456392	0.275347184409488	0.219848356206874	GPM6B/PFN2	2	PT
GO:0071383	cellular response to steroid hormone stimulus	2/65	211/18805	0.00947867298578199	2.74225300765585	1.4988668120832	0.16534428456392	0.275347184409488	0.219848356206874	GJB2/FOXP1	2	PT
GO:0002269	leukocyte activation involved in inflammatory response	1/65	53/18805	0.0188679245283019	5.45863570391872	1.91431381441383	0.167871117325213	0.277048910011049	0.221207082925001	SPHK1	1	PT
GO:0014075	response to amine	1/65	53/18805	0.0188679245283019	5.45863570391872	1.91431381441383	0.167871117325213	0.277048910011049	0.221207082925001	RGS4	1	PT
GO:0022602	ovulation cycle process	1/65	53/18805	0.0188679245283019	5.45863570391872	1.91431381441383	0.167871117325213	0.277048910011049	0.221207082925001	INHBA	1	PT
GO:0032964	collagen biosynthetic process	1/65	53/18805	0.0188679245283019	5.45863570391872	1.91431381441383	0.167871117325213	0.277048910011049	0.221207082925001	INHBA	1	PT
GO:0035088	establishment or maintenance of apical/basal cell polarity	1/65	53/18805	0.0188679245283019	5.45863570391872	1.91431381441383	0.167871117325213	0.277048910011049	0.221207082925001	WNT5A	1	PT
GO:0043303	mast cell degranulation	1/65	53/18805	0.0188679245283019	5.45863570391872	1.91431381441383	0.167871117325213	0.277048910011049	0.221207082925001	GRP	1	PT
GO:0060324	face development	1/65	53/18805	0.0188679245283019	5.45863570391872	1.91431381441383	0.167871117325213	0.277048910011049	0.221207082925001	WNT5A	1	PT
GO:0060688	regulation of morphogenesis of a branching structure	1/65	53/18805	0.0188679245283019	5.45863570391872	1.91431381441383	0.167871117325213	0.277048910011049	0.221207082925001	WNT5A	1	PT
GO:0061245	establishment or maintenance of bipolar cell polarity	1/65	53/18805	0.0188679245283019	5.45863570391872	1.91431381441383	0.167871117325213	0.277048910011049	0.221207082925001	WNT5A	1	PT
GO:0140353	lipid export from cell	1/65	53/18805	0.0188679245283019	5.45863570391872	1.91431381441383	0.167871117325213	0.277048910011049	0.221207082925001	INHBA	1	PT
GO:2000573	positive regulation of DNA biosynthetic process	1/65	53/18805	0.0188679245283019	5.45863570391872	1.91431381441383	0.167871117325213	0.277048910011049	0.221207082925001	SMOC2	1	PT
GO:0008016	regulation of heart contraction	2/65	214/18805	0.00934579439252336	2.70381020848311	1.4762969875646	0.169014956452502	0.278482739476255	0.222351910505797	CALM2/RGS4	2	PT
GO:0050777	negative regulation of immune response	2/65	214/18805	0.00934579439252336	2.70381020848311	1.4762969875646	0.169014956452502	0.278482739476255	0.222351910505797	TNFAIP3/CD59	2	PT
GO:0001836	release of cytochrome c from mitochondria	1/65	54/18805	0.0185185185185185	5.35754985754986	1.88853063493953	0.170755523115201	0.27975722840476	0.2233695141415	SOD2	1	PT
GO:0006220	pyrimidine nucleotide metabolic process	1/65	54/18805	0.0185185185185185	5.35754985754986	1.88853063493953	0.170755523115201	0.27975722840476	0.2233695141415	TYMP	1	PT
GO:0006778	porphyrin-containing compound metabolic process	1/65	54/18805	0.0185185185185185	5.35754985754986	1.88853063493953	0.170755523115201	0.27975722840476	0.2233695141415	TMEM14B	1	PT
GO:0042304	regulation of fatty acid biosynthetic process	1/65	54/18805	0.0185185185185185	5.35754985754986	1.88853063493953	0.170755523115201	0.27975722840476	0.2233695141415	FABP5	1	PT
GO:0050771	negative regulation of axonogenesis	1/65	54/18805	0.0185185185185185	5.35754985754986	1.88853063493953	0.170755523115201	0.27975722840476	0.2233695141415	WNT5A	1	PT
GO:0050873	brown fat cell differentiation	1/65	54/18805	0.0185185185185185	5.35754985754986	1.88853063493953	0.170755523115201	0.27975722840476	0.2233695141415	FABP4	1	PT
GO:0070169	positive regulation of biomineral tissue development	1/65	54/18805	0.0185185185185185	5.35754985754986	1.88853063493953	0.170755523115201	0.27975722840476	0.2233695141415	GPM6B	1	PT
GO:0006631	fatty acid metabolic process	3/65	413/18805	0.00726392251815981	2.10150866083069	1.33304702263885	0.17136900102592	0.280473977302895	0.223941795522935	CTHRC1/ALDH1L2/FABP5	3	PT
GO:0071805	potassium ion transmembrane transport	2/65	216/18805	0.00925925925925926	2.67877492877493	1.46146474362798	0.171470016741227	0.280473977302895	0.223941795522935	GRP/RGS4	2	PT
GO:0001654	eye development	3/65	415/18805	0.0072289156626506	2.09138090824838	1.32405657525399	0.173070183421071	0.282637395565466	0.225669156381315	INHBA/WNT5A/MFAP5	3	PT
GO:0010332	response to gamma radiation	1/65	55/18805	0.0181818181818182	5.26013986013986	1.86338061099062	0.173630083991822	0.282637395565466	0.225669156381315	SOD2	1	PT
GO:0032924	activin receptor signaling pathway	1/65	55/18805	0.0181818181818182	5.26013986013986	1.86338061099062	0.173630083991822	0.282637395565466	0.225669156381315	INHBA	1	PT
GO:0035176	social behavior	1/65	55/18805	0.0181818181818182	5.26013986013986	1.86338061099062	0.173630083991822	0.282637395565466	0.225669156381315	GRP	1	PT
GO:0042743	hydrogen peroxide metabolic process	1/65	55/18805	0.0181818181818182	5.26013986013986	1.86338061099062	0.173630083991822	0.282637395565466	0.225669156381315	SOD2	1	PT
GO:1903351	cellular response to dopamine	1/65	55/18805	0.0181818181818182	5.26013986013986	1.86338061099062	0.173630083991822	0.282637395565466	0.225669156381315	RGS4	1	PT
GO:0050679	positive regulation of epithelial cell proliferation	2/65	218/18805	0.00917431192660551	2.65419901199718	1.44679953575727	0.173931200531575	0.282900145442923	0.225878946536884	TNFAIP3/WNT5A	2	PT
GO:0034284	response to monosaccharide	2/65	220/18805	0.00909090909090909	2.63006993006993	1.43229771822223	0.176398310732664	0.284782499516986	0.227381894351184	COL6A3/SOD2	2	PT
GO:0044403	biological process involved in symbiotic interaction	2/65	220/18805	0.00909090909090909	2.63006993006993	1.43229771822223	0.176398310732664	0.284782499516986	0.227381894351184	CXCR4/CH25H	2	PT
GO:0045637	regulation of myeloid cell differentiation	2/65	220/18805	0.00909090909090909	2.63006993006993	1.43229771822223	0.176398310732664	0.284782499516986	0.227381894351184	INHBA/FOXP1	2	PT
GO:0150063	visual system development	3/65	419/18805	0.00715990453460621	2.0714154580503	1.30622592133305	0.176487343009333	0.284782499516986	0.227381894351184	INHBA/WNT5A/MFAP5	3	PT
GO:0001954	positive regulation of cell-matrix adhesion	1/65	56/18805	0.0178571428571429	5.16620879120879	1.83883599433213	0.176494833033984	0.284782499516986	0.227381894351184	FERMT2	1	PT
GO:0002279	mast cell activation involved in immune response	1/65	56/18805	0.0178571428571429	5.16620879120879	1.83883599433213	0.176494833033984	0.284782499516986	0.227381894351184	GRP	1	PT
GO:0002448	mast cell mediated immunity	1/65	56/18805	0.0178571428571429	5.16620879120879	1.83883599433213	0.176494833033984	0.284782499516986	0.227381894351184	GRP	1	PT
GO:0006473	protein acetylation	1/65	56/18805	0.0178571428571429	5.16620879120879	1.83883599433213	0.176494833033984	0.284782499516986	0.227381894351184	SPHK1	1	PT
GO:0086065	cell communication involved in cardiac conduction	1/65	56/18805	0.0178571428571429	5.16620879120879	1.83883599433213	0.176494833033984	0.284782499516986	0.227381894351184	CALM2	1	PT
GO:1900087	positive regulation of G1/S transition of mitotic cell cycle	1/65	56/18805	0.0178571428571429	5.16620879120879	1.83883599433213	0.176494833033984	0.284782499516986	0.227381894351184	CCND2	1	PT
GO:0006643	membrane lipid metabolic process	2/65	221/18805	0.00904977375565611	2.61816916115559	1.42510697256341	0.17763402728939	0.286392440494438	0.228667336503941	PLPP3/SPHK1	2	PT
GO:0040013	negative regulation of locomotion	3/65	421/18805	0.00712589073634204	2.06157500456788	1.29738458286135	0.17820318768108	0.286648264800867	0.228871597002798	CDH11/WNT5A/PFN2	3	PT
GO:0007601	visual perception	2/65	222/18805	0.00900900900900901	2.60637560637561	1.41795575829444	0.178871152603128	0.286648264800867	0.228871597002798	LUM/TIMP3	2	PT
GO:0002762	negative regulation of myeloid leukocyte differentiation	1/65	57/18805	0.0175438596491228	5.07557354925776	1.81487073100289	0.179349803211209	0.286648264800867	0.228871597002798	INHBA	1	PT
GO:0006749	glutathione metabolic process	1/65	57/18805	0.0175438596491228	5.07557354925776	1.81487073100289	0.179349803211209	0.286648264800867	0.228871597002798	SOD2	1	PT
GO:0031529	ruffle organization	1/65	57/18805	0.0175438596491228	5.07557354925776	1.81487073100289	0.179349803211209	0.286648264800867	0.228871597002798	PFN2	1	PT
GO:0032147	activation of protein kinase activity	1/65	57/18805	0.0175438596491228	5.07557354925776	1.81487073100289	0.179349803211209	0.286648264800867	0.228871597002798	WNT5A	1	PT
GO:0034205	amyloid-beta formation	1/65	57/18805	0.0175438596491228	5.07557354925776	1.81487073100289	0.179349803211209	0.286648264800867	0.228871597002798	BACE1	1	PT
GO:0042220	response to cocaine	1/65	57/18805	0.0175438596491228	5.07557354925776	1.81487073100289	0.179349803211209	0.286648264800867	0.228871597002798	RGS4	1	PT
GO:0051703	biological process involved in intraspecies interaction between organisms	1/65	57/18805	0.0175438596491228	5.07557354925776	1.81487073100289	0.179349803211209	0.286648264800867	0.228871597002798	GRP	1	PT
GO:0071385	cellular response to glucocorticoid stimulus	1/65	57/18805	0.0175438596491228	5.07557354925776	1.81487073100289	0.179349803211209	0.286648264800867	0.228871597002798	GJB2	1	PT
GO:1903350	response to dopamine	1/65	57/18805	0.0175438596491228	5.07557354925776	1.81487073100289	0.179349803211209	0.286648264800867	0.228871597002798	RGS4	1	PT
GO:0014706	striated muscle tissue development	3/65	423/18805	0.00709219858156028	2.05182760501909	1.28859183068347	0.179923787446462	0.287338856134925	0.229422993124494	RGS4/FHL2/FOXP1	3	PT
GO:0009615	response to virus	3/65	425/18805	0.00705882352941176	2.04217194570136	1.27984712143197	0.181649076336644	0.28891537231995	0.230681747567742	CXCR4/TNFAIP3/ACTA2	3	PT
GO:0015804	neutral amino acid transport	1/65	58/18805	0.0172413793103448	4.98806366047745	1.79146033002922	0.182195027383989	0.28891537231995	0.230681747567742	RGS4	1	PT
GO:0030837	negative regulation of actin filament polymerization	1/65	58/18805	0.0172413793103448	4.98806366047745	1.79146033002922	0.182195027383989	0.28891537231995	0.230681747567742	PFN2	1	PT
GO:0043462	regulation of ATP-dependent activity	1/65	58/18805	0.0172413793103448	4.98806366047745	1.79146033002922	0.182195027383989	0.28891537231995	0.230681747567742	PFN2	1	PT
GO:0071868	cellular response to monoamine stimulus	1/65	58/18805	0.0172413793103448	4.98806366047745	1.79146033002922	0.182195027383989	0.28891537231995	0.230681747567742	RGS4	1	PT
GO:0071870	cellular response to catecholamine stimulus	1/65	58/18805	0.0172413793103448	4.98806366047745	1.79146033002922	0.182195027383989	0.28891537231995	0.230681747567742	RGS4	1	PT
GO:0098732	macromolecule deacylation	1/65	58/18805	0.0172413793103448	4.98806366047745	1.79146033002922	0.182195027383989	0.28891537231995	0.230681747567742	NNMT	1	PT
GO:1904645	response to amyloid-beta	1/65	58/18805	0.0172413793103448	4.98806366047745	1.79146033002922	0.182195027383989	0.28891537231995	0.230681747567742	BACE1	1	PT
GO:2001238	positive regulation of extrinsic apoptotic signaling pathway	1/65	58/18805	0.0172413793103448	4.98806366047745	1.79146033002922	0.182195027383989	0.28891537231995	0.230681747567742	INHBA	1	PT
GO:0048880	sensory system development	3/65	426/18805	0.00704225352112676	2.0373781148429	1.2754926154858	0.182513458622537	0.289193860493456	0.230904103816997	INHBA/WNT5A/MFAP5	3	PT
GO:0050953	sensory perception of light stimulus	2/65	226/18805	0.00884955752212389	2.56024506466984	1.38973781856942	0.183833264001327	0.290302927555476	0.231789627927336	LUM/TIMP3	2	PT
GO:0009948	anterior/posterior axis specification	1/65	59/18805	0.0169491525423729	4.90352020860495	1.76858174438587	0.185030538304138	0.290302927555476	0.231789627927336	WNT5A	1	PT
GO:0019369	arachidonate metabolic process	1/65	59/18805	0.0169491525423729	4.90352020860495	1.76858174438587	0.185030538304138	0.290302927555476	0.231789627927336	CTHRC1	1	PT
GO:0019748	secondary metabolic process	1/65	59/18805	0.0169491525423729	4.90352020860495	1.76858174438587	0.185030538304138	0.290302927555476	0.231789627927336	WNT5A	1	PT
GO:0039532	negative regulation of cytoplasmic pattern recognition receptor signaling pathway	1/65	59/18805	0.0169491525423729	4.90352020860495	1.76858174438587	0.185030538304138	0.290302927555476	0.231789627927336	TNFAIP3	1	PT
GO:0045912	negative regulation of carbohydrate metabolic process	1/65	59/18805	0.0169491525423729	4.90352020860495	1.76858174438587	0.185030538304138	0.290302927555476	0.231789627927336	C1QTNF3	1	PT
GO:0060135	maternal process involved in female pregnancy	1/65	59/18805	0.0169491525423729	4.90352020860495	1.76858174438587	0.185030538304138	0.290302927555476	0.231789627927336	GJB2	1	PT
GO:0061005	cell differentiation involved in kidney development	1/65	59/18805	0.0169491525423729	4.90352020860495	1.76858174438587	0.185030538304138	0.290302927555476	0.231789627927336	ACTA2	1	PT
GO:0061900	glial cell activation	1/65	59/18805	0.0169491525423729	4.90352020860495	1.76858174438587	0.185030538304138	0.290302927555476	0.231789627927336	SPHK1	1	PT
GO:1901019	regulation of calcium ion transmembrane transporter activity	1/65	59/18805	0.0169491525423729	4.90352020860495	1.76858174438587	0.185030538304138	0.290302927555476	0.231789627927336	CALM2	1	PT
GO:0006457	protein folding	2/65	227/18805	0.00881057268722467	2.54896645205015	1.38277801948191	0.185077076283516	0.290302927555476	0.231789627927336	FKBP2/HSPE1	2	PT
GO:0042180	ketone metabolic process	2/65	227/18805	0.00881057268722467	2.54896645205015	1.38277801948191	0.185077076283516	0.290302927555476	0.231789627927336	INHBA/FABP5	2	PT
GO:0050866	negative regulation of cell activation	2/65	227/18805	0.00881057268722467	2.54896645205015	1.38277801948191	0.185077076283516	0.290302927555476	0.231789627927336	TNFAIP3/INHBA	2	PT
GO:0045055	regulated exocytosis	2/65	228/18805	0.0087719298245614	2.53778677462888	1.37585529889526	0.186322155595109	0.29202969433444	0.233168348536816	GRP/PFN2	2	PT
GO:0072330	monocarboxylic acid biosynthetic process	2/65	229/18805	0.00873362445414847	2.52670473631172	1.36896926933601	0.187568478811199	0.293525575961172	0.234362721079329	CTHRC1/FABP5	2	PT
GO:0000079	regulation of cyclin-dependent protein serine/threonine kinase activity	1/65	60/18805	0.0166666666666667	4.82179487179487	1.7462132628751	0.18785636861515	0.293525575961172	0.234362721079329	CCND2	1	PT
GO:0001541	ovarian follicle development	1/65	60/18805	0.0166666666666667	4.82179487179487	1.7462132628751	0.18785636861515	0.293525575961172	0.234362721079329	INHBA	1	PT
GO:0042733	embryonic digit morphogenesis	1/65	60/18805	0.0166666666666667	4.82179487179487	1.7462132628751	0.18785636861515	0.293525575961172	0.234362721079329	WNT5A	1	PT
GO:0001706	endoderm formation	1/65	61/18805	0.0163934426229508	4.74274905422446	1.72433441175867	0.190672550852547	0.297237810220484	0.237326719427505	INHBA	1	PT
GO:0071867	response to monoamine	1/65	61/18805	0.0163934426229508	4.74274905422446	1.72433441175867	0.190672550852547	0.297237810220484	0.237326719427505	RGS4	1	PT
GO:0071869	response to catecholamine	1/65	61/18805	0.0163934426229508	4.74274905422446	1.72433441175867	0.190672550852547	0.297237810220484	0.237326719427505	RGS4	1	PT
GO:0071222	cellular response to lipopolysaccharide	2/65	232/18805	0.00862068965517241	2.49403183023873	1.34852753817472	0.191314682733739	0.29800940964294	0.237942795691517	TNFAIP3/WNT5A	2	PT
GO:0003179	heart valve morphogenesis	1/65	62/18805	0.0161290322580645	4.66625310173697	1.7029258651185	0.193479117444234	0.299766803997379	0.239345970599077	CDH11	1	PT
GO:0022029	telencephalon cell migration	1/65	62/18805	0.0161290322580645	4.66625310173697	1.7029258651185	0.193479117444234	0.299766803997379	0.239345970599077	CXCR4	1	PT
GO:0031663	lipopolysaccharide-mediated signaling pathway	1/65	62/18805	0.0161290322580645	4.66625310173697	1.7029258651185	0.193479117444234	0.299766803997379	0.239345970599077	TNFAIP3	1	PT
GO:0032731	positive regulation of interleukin-1 beta production	1/65	62/18805	0.0161290322580645	4.66625310173697	1.7029258651185	0.193479117444234	0.299766803997379	0.239345970599077	WNT5A	1	PT
GO:0038066	p38MAPK cascade	1/65	62/18805	0.0161290322580645	4.66625310173697	1.7029258651185	0.193479117444234	0.299766803997379	0.239345970599077	SPHK1	1	PT
GO:0046173	polyol biosynthetic process	1/65	62/18805	0.0161290322580645	4.66625310173697	1.7029258651185	0.193479117444234	0.299766803997379	0.239345970599077	SPHK1	1	PT
GO:1903409	reactive oxygen species biosynthetic process	1/65	62/18805	0.0161290322580645	4.66625310173697	1.7029258651185	0.193479117444234	0.299766803997379	0.239345970599077	SOD2	1	PT
GO:0009165	nucleotide biosynthetic process	2/65	234/18805	0.00854700854700855	2.47271531886917	1.33507632405631	0.193817953851786	0.299832969098446	0.239398799498486	NDUFA13/NNMT	2	PT
GO:0050821	protein stabilization	2/65	234/18805	0.00854700854700855	2.47271531886917	1.33507632405631	0.193817953851786	0.299832969098446	0.239398799498486	PLPP3/PFN2	2	PT
GO:0006940	regulation of smooth muscle contraction	1/65	63/18805	0.0158730158730159	4.59218559218559	1.6819693630444	0.196276100710847	0.302941390197763	0.241880688937629	SPHK1	1	PT
GO:0010257	NADH dehydrogenase complex assembly	1/65	63/18805	0.0158730158730159	4.59218559218559	1.6819693630444	0.196276100710847	0.302941390197763	0.241880688937629	NDUFA13	1	PT
GO:0032981	mitochondrial respiratory chain complex I assembly	1/65	63/18805	0.0158730158730159	4.59218559218559	1.6819693630444	0.196276100710847	0.302941390197763	0.241880688937629	NDUFA13	1	PT
GO:0009314	response to radiation	3/65	442/18805	0.00678733031674208	1.96362687086669	1.20738346996973	0.196494087114305	0.303046859410866	0.241964899833705	COL6A3/CCND2/SOD2	3	PT
GO:0006909	phagocytosis	2/65	238/18805	0.00840336134453781	2.4311570782159	1.30858494333193	0.198837616635434	0.305970816611699	0.24429950581706	SPHK1/MFGE8	2	PT
GO:0033013	tetrapyrrole metabolic process	1/65	64/18805	0.015625	4.52043269230769	1.66144763685263	0.199063532866103	0.305970816611699	0.24429950581706	TMEM14B	1	PT
GO:0034142	toll-like receptor 4 signaling pathway	1/65	64/18805	0.015625	4.52043269230769	1.66144763685263	0.199063532866103	0.305970816611699	0.24429950581706	TNFAIP3	1	PT
GO:0045620	negative regulation of lymphocyte differentiation	1/65	64/18805	0.015625	4.52043269230769	1.66144763685263	0.199063532866103	0.305970816611699	0.24429950581706	INHBA	1	PT
GO:0007005	mitochondrion organization	3/65	445/18805	0.00674157303370787	1.95038893690579	1.19492884683936	0.199145450021837	0.305970816611699	0.24429950581706	SOD2/NDUFA13/TYMP	3	PT
GO:0060537	muscle tissue development	3/65	446/18805	0.00672645739910314	1.94601586754053	1.19079868294234	0.200031234769805	0.306393499388846	0.24463699288435	RGS4/FHL2/FOXP1	3	PT
GO:0006816	calcium ion transport	3/65	447/18805	0.00671140939597315	1.94166236448116	1.18667911317112	0.200918004689457	0.306393499388846	0.24463699288435	CXCR4/CALM2/RGS4	3	PT
GO:0008406	gonad development	2/65	240/18805	0.00833333333333333	2.41089743589744	1.2955393083359	0.201353657000063	0.306393499388846	0.24463699288435	INHBA/WNT5A	2	PT
GO:0042445	hormone metabolic process	2/65	240/18805	0.00833333333333333	2.41089743589744	1.2955393083359	0.201353657000063	0.306393499388846	0.24463699288435	INHBA/DIO2	2	PT
GO:0006163	purine nucleotide metabolic process	3/65	448/18805	0.00669642857142857	1.9373282967033	1.18257008150484	0.201805751766644	0.306393499388846	0.24463699288435	NDUFA13/ALDH1L2/NNMT	3	PT
GO:0001756	somitogenesis	1/65	65/18805	0.0153846153846154	4.4508875739645	1.64134434063169	0.201841446017146	0.306393499388846	0.24463699288435	WNT5A	1	PT
GO:0001947	heart looping	1/65	65/18805	0.0153846153846154	4.4508875739645	1.64134434063169	0.201841446017146	0.306393499388846	0.24463699288435	WNT5A	1	PT
GO:0002931	response to ischemia	1/65	65/18805	0.0153846153846154	4.4508875739645	1.64134434063169	0.201841446017146	0.306393499388846	0.24463699288435	GJB2	1	PT
GO:0006956	complement activation	1/65	65/18805	0.0153846153846154	4.4508875739645	1.64134434063169	0.201841446017146	0.306393499388846	0.24463699288435	CD59	1	PT
GO:0021885	forebrain cell migration	1/65	65/18805	0.0153846153846154	4.4508875739645	1.64134434063169	0.201841446017146	0.306393499388846	0.24463699288435	CXCR4	1	PT
GO:0022617	extracellular matrix disassembly	1/65	65/18805	0.0153846153846154	4.4508875739645	1.64134434063169	0.201841446017146	0.306393499388846	0.24463699288435	MMP11	1	PT
GO:0032615	interleukin-12 production	1/65	65/18805	0.0153846153846154	4.4508875739645	1.64134434063169	0.201841446017146	0.306393499388846	0.24463699288435	FOXP1	1	PT
GO:0032655	regulation of interleukin-12 production	1/65	65/18805	0.0153846153846154	4.4508875739645	1.64134434063169	0.201841446017146	0.306393499388846	0.24463699288435	FOXP1	1	PT
GO:0032757	positive regulation of interleukin-8 production	1/65	65/18805	0.0153846153846154	4.4508875739645	1.64134434063169	0.201841446017146	0.306393499388846	0.24463699288435	WNT5A	1	PT
GO:0045428	regulation of nitric oxide biosynthetic process	1/65	65/18805	0.0153846153846154	4.4508875739645	1.64134434063169	0.201841446017146	0.306393499388846	0.24463699288435	SOD2	1	PT
GO:0072666	establishment of protein localization to vacuole	1/65	65/18805	0.0153846153846154	4.4508875739645	1.64134434063169	0.201841446017146	0.306393499388846	0.24463699288435	TNFAIP3	1	PT
GO:0048732	gland development	3/65	451/18805	0.00665188470066519	1.92444141224629	1.17030566128889	0.204474775969975	0.306914808247348	0.245053227013867	TNFAIP3/SOD2/WNT5A	3	PT
GO:0001655	urogenital system development	1/65	66/18805	0.0151515151515152	4.38344988344988	1.62164398849121	0.204609872164899	0.306914808247348	0.245053227013867	WNT5A	1	PT
GO:0006383	transcription by RNA polymerase III	1/65	66/18805	0.0151515151515152	4.38344988344988	1.62164398849121	0.204609872164899	0.306914808247348	0.245053227013867	INHBA	1	PT
GO:0008631	intrinsic apoptotic signaling pathway in response to oxidative stress	1/65	66/18805	0.0151515151515152	4.38344988344988	1.62164398849121	0.204609872164899	0.306914808247348	0.245053227013867	SOD2	1	PT
GO:0010812	negative regulation of cell-substrate adhesion	1/65	66/18805	0.0151515151515152	4.38344988344988	1.62164398849121	0.204609872164899	0.306914808247348	0.245053227013867	POSTN	1	PT
GO:0031100	animal organ regeneration	1/65	66/18805	0.0151515151515152	4.38344988344988	1.62164398849121	0.204609872164899	0.306914808247348	0.245053227013867	NNMT	1	PT
GO:0033135	regulation of peptidyl-serine phosphorylation	1/65	66/18805	0.0151515151515152	4.38344988344988	1.62164398849121	0.204609872164899	0.306914808247348	0.245053227013867	PFN2	1	PT
GO:0045744	negative regulation of G protein-coupled receptor signaling pathway	1/65	66/18805	0.0151515151515152	4.38344988344988	1.62164398849121	0.204609872164899	0.306914808247348	0.245053227013867	RGS4	1	PT
GO:0050688	regulation of defense response to virus	1/65	66/18805	0.0151515151515152	4.38344988344988	1.62164398849121	0.204609872164899	0.306914808247348	0.245053227013867	TNFAIP3	1	PT
GO:0051289	protein homotetramerization	1/65	66/18805	0.0151515151515152	4.38344988344988	1.62164398849121	0.204609872164899	0.306914808247348	0.245053227013867	SOD2	1	PT
GO:0052548	regulation of endopeptidase activity	1/65	66/18805	0.0151515151515152	4.38344988344988	1.62164398849121	0.204609872164899	0.306914808247348	0.245053227013867	TIMP3	1	PT
GO:0070050	neuron cellular homeostasis	1/65	66/18805	0.0151515151515152	4.38344988344988	1.62164398849121	0.204609872164899	0.306914808247348	0.245053227013867	CALB2	1	PT
GO:0071384	cellular response to corticosteroid stimulus	1/65	66/18805	0.0151515151515152	4.38344988344988	1.62164398849121	0.204609872164899	0.306914808247348	0.245053227013867	GJB2	1	PT
GO:0097192	extrinsic apoptotic signaling pathway in absence of ligand	1/65	66/18805	0.0151515151515152	4.38344988344988	1.62164398849121	0.204609872164899	0.306914808247348	0.245053227013867	INHBA	1	PT
GO:1901224	positive regulation of non-canonical NF-kappaB signal transduction	1/65	66/18805	0.0151515151515152	4.38344988344988	1.62164398849121	0.204609872164899	0.306914808247348	0.245053227013867	SPHK1	1	PT
GO:2000351	regulation of endothelial cell apoptotic process	1/65	66/18805	0.0151515151515152	4.38344988344988	1.62164398849121	0.204609872164899	0.306914808247348	0.245053227013867	TNFAIP3	1	PT
GO:1903320	regulation of protein modification by small protein conjugation or removal	2/65	243/18805	0.00823045267489712	2.38113327002216	1.27621353428206	0.205134993029524	0.307247308346736	0.245318708574704	TNFAIP3/SPHK1	2	PT
GO:2001234	negative regulation of apoptotic signaling pathway	2/65	243/18805	0.00823045267489712	2.38113327002216	1.27621353428206	0.205134993029524	0.307247308346736	0.245318708574704	TNFAIP3/SOD2	2	PT
GO:0009410	response to xenobiotic stimulus	3/65	453/18805	0.00662251655629139	1.91594498217015	1.16218106358917	0.206258864807995	0.307842229133016	0.245793717452014	CXCR4/SOD2/NNMT	3	PT
GO:0051960	regulation of nervous system development	3/65	454/18805	0.0066079295154185	1.91172483903761	1.15813410766748	0.207152307166357	0.307842229133016	0.245793717452014	CXCR4/WNT5A/TYMP	3	PT
GO:0032623	interleukin-2 production	1/65	67/18805	0.0149253731343284	4.31802525832377	1.6023318969604	0.207368843204404	0.307842229133016	0.245793717452014	TNFAIP3	1	PT
GO:0032663	regulation of interleukin-2 production	1/65	67/18805	0.0149253731343284	4.31802525832377	1.6023318969604	0.207368843204404	0.307842229133016	0.245793717452014	TNFAIP3	1	PT
GO:0034394	protein localization to cell surface	1/65	67/18805	0.0149253731343284	4.31802525832377	1.6023318969604	0.207368843204404	0.307842229133016	0.245793717452014	GPM6B	1	PT
GO:0042446	hormone biosynthetic process	1/65	67/18805	0.0149253731343284	4.31802525832377	1.6023318969604	0.207368843204404	0.307842229133016	0.245793717452014	DIO2	1	PT
GO:0045453	bone resorption	1/65	67/18805	0.0149253731343284	4.31802525832377	1.6023318969604	0.207368843204404	0.307842229133016	0.245793717452014	TNFAIP3	1	PT
GO:0050909	sensory perception of taste	1/65	67/18805	0.0149253731343284	4.31802525832377	1.6023318969604	0.207368843204404	0.307842229133016	0.245793717452014	PIP	1	PT
GO:0051926	negative regulation of calcium ion transport	1/65	67/18805	0.0149253731343284	4.31802525832377	1.6023318969604	0.207368843204404	0.307842229133016	0.245793717452014	CALM2	1	PT
GO:0080164	regulation of nitric oxide metabolic process	1/65	67/18805	0.0149253731343284	4.31802525832377	1.6023318969604	0.207368843204404	0.307842229133016	0.245793717452014	SOD2	1	PT
GO:0006813	potassium ion transport	2/65	245/18805	0.00816326530612245	2.36169544740973	1.26348778606846	0.207660486417629	0.307842229133016	0.245793717452014	GRP/RGS4	2	PT
GO:0009743	response to carbohydrate	2/65	245/18805	0.00816326530612245	2.36169544740973	1.26348778606846	0.207660486417629	0.307842229133016	0.245793717452014	COL6A3/SOD2	2	PT
GO:0045137	development of primary sexual characteristics	2/65	245/18805	0.00816326530612245	2.36169544740973	1.26348778606846	0.207660486417629	0.307842229133016	0.245793717452014	INHBA/WNT5A	2	PT
GO:0045333	cellular respiration	2/65	245/18805	0.00816326530612245	2.36169544740973	1.26348778606846	0.207660486417629	0.307842229133016	0.245793717452014	SOD2/NDUFA13	2	PT
GO:0071219	cellular response to molecule of bacterial origin	2/65	246/18805	0.00813008130081301	2.35209505941213	1.25717142130817	0.208924551032735	0.309489550725156	0.247109005803165	TNFAIP3/WNT5A	2	PT
GO:0032414	positive regulation of ion transmembrane transporter activity	1/65	68/18805	0.0147058823529412	4.25452488687783	1.5833941320431	0.21011839092517	0.310123718384452	0.247615350975188	CALM2	1	PT
GO:0038034	signal transduction in absence of ligand	1/65	68/18805	0.0147058823529412	4.25452488687783	1.5833941320431	0.21011839092517	0.310123718384452	0.247615350975188	INHBA	1	PT
GO:0042776	proton motive force-driven mitochondrial ATP synthesis	1/65	68/18805	0.0147058823529412	4.25452488687783	1.5833941320431	0.21011839092517	0.310123718384452	0.247615350975188	NDUFA13	1	PT
GO:0051057	positive regulation of small GTPase mediated signal transduction	1/65	68/18805	0.0147058823529412	4.25452488687783	1.5833941320431	0.21011839092517	0.310123718384452	0.247615350975188	FERMT2	1	PT
GO:0051445	regulation of meiotic cell cycle	1/65	68/18805	0.0147058823529412	4.25452488687783	1.5833941320431	0.21011839092517	0.310123718384452	0.247615350975188	WNT5A	1	PT
GO:1901873	regulation of post-translational protein modification	2/65	248/18805	0.00806451612903226	2.33312655086849	1.24463021795659	0.211455212583728	0.311869486876947	0.249009243323192	TNFAIP3/SPHK1	2	PT
GO:0006869	lipid transport	3/65	460/18805	0.00652173913043478	1.88678929765886	1.13406385093881	0.212532033414197	0.312120606588211	0.249209747482517	FABP4/INHBA/FABP5	3	PT
GO:0010632	regulation of epithelial cell migration	1/65	69/18805	0.0144927536231884	4.19286510590858	1.56481746049075	0.212858547011516	0.312120606588211	0.249209747482517	PFN2	1	PT
GO:0043525	positive regulation of neuron apoptotic process	1/65	69/18805	0.0144927536231884	4.19286510590858	1.56481746049075	0.212858547011516	0.312120606588211	0.249209747482517	BACE1	1	PT
GO:0045576	mast cell activation	1/65	69/18805	0.0144927536231884	4.19286510590858	1.56481746049075	0.212858547011516	0.312120606588211	0.249209747482517	GRP	1	PT
GO:0048645	animal organ formation	1/65	69/18805	0.0144927536231884	4.19286510590858	1.56481746049075	0.212858547011516	0.312120606588211	0.249209747482517	WNT5A	1	PT
GO:0048857	neural nucleus development	1/65	69/18805	0.0144927536231884	4.19286510590858	1.56481746049075	0.212858547011516	0.312120606588211	0.249209747482517	CALM2	1	PT
GO:0051055	negative regulation of lipid biosynthetic process	1/65	69/18805	0.0144927536231884	4.19286510590858	1.56481746049075	0.212858547011516	0.312120606588211	0.249209747482517	SPHK1	1	PT
GO:0061180	mammary gland epithelium development	1/65	69/18805	0.0144927536231884	4.19286510590858	1.56481746049075	0.212858547011516	0.312120606588211	0.249209747482517	WNT5A	1	PT
GO:0002573	myeloid leukocyte differentiation	2/65	250/18805	0.008	2.31446153846154	1.23220910725504	0.213989114029759	0.313551342916253	0.250352105377188	INHBA/FOXP1	2	PT
GO:0007015	actin filament organization	3/65	463/18805	0.00647948164146868	1.87456388104336	1.12216235276285	0.215233802355128	0.314077999756761	0.250772609552376	RGS4/PFN2/FERMT2	3	PT
GO:0051338	regulation of transferase activity	3/65	463/18805	0.00647948164146868	1.87456388104336	1.12216235276285	0.215233802355128	0.314077999756761	0.250772609552376	CCND2/CALM2/WNT5A	3	PT
GO:0009913	epidermal cell differentiation	2/65	251/18805	0.00796812749003984	2.30524057615691	1.22604287323252	0.215257228990751	0.314077999756761	0.250772609552376	WNT5A/TCHH	2	PT
GO:0043627	response to estrogen	1/65	70/18805	0.0142857142857143	4.13296703296703	1.5465893049011	0.215589343042912	0.314077999756761	0.250772609552376	KRT19	1	PT
GO:0046888	negative regulation of hormone secretion	1/65	70/18805	0.0142857142857143	4.13296703296703	1.5465893049011	0.215589343042912	0.314077999756761	0.250772609552376	INHBA	1	PT
GO:0060113	inner ear receptor cell differentiation	1/65	70/18805	0.0142857142857143	4.13296703296703	1.5465893049011	0.215589343042912	0.314077999756761	0.250772609552376	CTHRC1	1	PT
GO:0061371	determination of heart left/right asymmetry	1/65	70/18805	0.0142857142857143	4.13296703296703	1.5465893049011	0.215589343042912	0.314077999756761	0.250772609552376	WNT5A	1	PT
GO:2000401	regulation of lymphocyte migration	1/65	70/18805	0.0142857142857143	4.13296703296703	1.5465893049011	0.215589343042912	0.314077999756761	0.250772609552376	WNT5A	1	PT
GO:0006814	sodium ion transport	2/65	252/18805	0.00793650793650794	2.2960927960928	1.21990581403723	0.216526093311042	0.315215915855399	0.251681167903258	GRP/CNTN1	2	PT
GO:0003143	embryonic heart tube morphogenesis	1/65	71/18805	0.0140845070422535	4.07475622968581	1.52869770229229	0.218310810494325	0.315996705683351	0.25230458215965	WNT5A	1	PT
GO:0030225	macrophage differentiation	1/65	71/18805	0.0140845070422535	4.07475622968581	1.52869770229229	0.218310810494325	0.315996705683351	0.25230458215965	INHBA	1	PT
GO:0042987	amyloid precursor protein catabolic process	1/65	71/18805	0.0140845070422535	4.07475622968581	1.52869770229229	0.218310810494325	0.315996705683351	0.25230458215965	BACE1	1	PT
GO:0043406	positive regulation of MAP kinase activity	1/65	71/18805	0.0140845070422535	4.07475622968581	1.52869770229229	0.218310810494325	0.315996705683351	0.25230458215965	WNT5A	1	PT
GO:0046513	ceramide biosynthetic process	1/65	71/18805	0.0140845070422535	4.07475622968581	1.52869770229229	0.218310810494325	0.315996705683351	0.25230458215965	SPHK1	1	PT
GO:0048002	antigen processing and presentation of peptide antigen	1/65	71/18805	0.0140845070422535	4.07475622968581	1.52869770229229	0.218310810494325	0.315996705683351	0.25230458215965	HLA-DMA	1	PT
GO:0050435	amyloid-beta metabolic process	1/65	71/18805	0.0140845070422535	4.07475622968581	1.52869770229229	0.218310810494325	0.315996705683351	0.25230458215965	BACE1	1	PT
GO:1902808	positive regulation of cell cycle G1/S phase transition	1/65	71/18805	0.0140845070422535	4.07475622968581	1.52869770229229	0.218310810494325	0.315996705683351	0.25230458215965	CCND2	1	PT
GO:1901987	regulation of cell cycle phase transition	3/65	468/18805	0.00641025641025641	1.85453648915187	1.10251981207383	0.219753657324749	0.31785796863044	0.253790689963018	CCND2/INHBA/TMEM14B	3	PT
GO:0043523	regulation of neuron apoptotic process	2/65	255/18805	0.00784313725490196	2.26907993966817	1.20166695577184	0.220336983624876	0.317877511357611	0.253806293668767	SOD2/BACE1	2	PT
GO:0015711	organic anion transport	3/65	469/18805	0.00639658848614072	1.85058225356733	1.09861985831262	0.220660094226135	0.317877511357611	0.253806293668767	FABP4/FABP5/RGS4	3	PT
GO:0006414	translational elongation	1/65	72/18805	0.0138888888888889	4.01816239316239	1.51113126583848	0.221022980736551	0.317877511357611	0.253806293668767	DIO2	1	PT
GO:0043124	negative regulation of canonical NF-kappaB signal transduction	1/65	72/18805	0.0138888888888889	4.01816239316239	1.51113126583848	0.221022980736551	0.317877511357611	0.253806293668767	TNFAIP3	1	PT
GO:0050918	positive chemotaxis	1/65	72/18805	0.0138888888888889	4.01816239316239	1.51113126583848	0.221022980736551	0.317877511357611	0.253806293668767	WNT5A	1	PT
GO:0072577	endothelial cell apoptotic process	1/65	72/18805	0.0138888888888889	4.01816239316239	1.51113126583848	0.221022980736551	0.317877511357611	0.253806293668767	TNFAIP3	1	PT
GO:0140895	cell surface toll-like receptor signaling pathway	1/65	72/18805	0.0138888888888889	4.01816239316239	1.51113126583848	0.221022980736551	0.317877511357611	0.253806293668767	TNFAIP3	1	PT
GO:2000134	negative regulation of G1/S transition of mitotic cell cycle	1/65	72/18805	0.0138888888888889	4.01816239316239	1.51113126583848	0.221022980736551	0.317877511357611	0.253806293668767	INHBA	1	PT
GO:0014015	positive regulation of gliogenesis	1/65	73/18805	0.0136986301369863	3.96311907270811	1.49387914948532	0.223725885036563	0.32039951711389	0.255819965321343	CXCR4	1	PT
GO:0032272	negative regulation of protein polymerization	1/65	73/18805	0.0136986301369863	3.96311907270811	1.49387914948532	0.223725885036563	0.32039951711389	0.255819965321343	PFN2	1	PT
GO:0032835	glomerulus development	1/65	73/18805	0.0136986301369863	3.96311907270811	1.49387914948532	0.223725885036563	0.32039951711389	0.255819965321343	ACTA2	1	PT
GO:0033143	regulation of intracellular steroid hormone receptor signaling pathway	1/65	73/18805	0.0136986301369863	3.96311907270811	1.49387914948532	0.223725885036563	0.32039951711389	0.255819965321343	FOXP1	1	PT
GO:0050854	regulation of antigen receptor-mediated signaling pathway	1/65	73/18805	0.0136986301369863	3.96311907270811	1.49387914948532	0.223725885036563	0.32039951711389	0.255819965321343	FOXP1	1	PT
GO:0061035	regulation of cartilage development	1/65	73/18805	0.0136986301369863	3.96311907270811	1.49387914948532	0.223725885036563	0.32039951711389	0.255819965321343	WNT5A	1	PT
GO:0031669	cellular response to nutrient levels	2/65	258/18805	0.00775193798449612	2.24269528920692	1.18368099669199	0.224153907693175	0.320559084095112	0.255947370068924	INHBA/POSTN	2	PT
GO:0099003	vesicle-mediated transport in synapse	2/65	258/18805	0.00775193798449612	2.24269528920692	1.18368099669199	0.224153907693175	0.320559084095112	0.255947370068924	CALM2/PFN2	2	PT
GO:0045927	positive regulation of growth	2/65	259/18805	0.00772200772200772	2.23403623403623	1.1777406696939	0.225427466081565	0.322152871429195	0.257219914497852	CXCR4/SPHK1	2	PT
GO:0006635	fatty acid beta-oxidation	1/65	74/18805	0.0135135135135135	3.90956340956341	1.47693101519225	0.226419554557843	0.322659815608468	0.257624679285046	ALDH1L2	1	PT
GO:0016126	sterol biosynthetic process	1/65	74/18805	0.0135135135135135	3.90956340956341	1.47693101519225	0.226419554557843	0.322659815608468	0.257624679285046	CH25H	1	PT
GO:0030514	negative regulation of BMP signaling pathway	1/65	74/18805	0.0135135135135135	3.90956340956341	1.47693101519225	0.226419554557843	0.322659815608468	0.257624679285046	WNT5A	1	PT
GO:0032732	positive regulation of interleukin-1 production	1/65	74/18805	0.0135135135135135	3.90956340956341	1.47693101519225	0.226419554557843	0.322659815608468	0.257624679285046	WNT5A	1	PT
GO:0003170	heart valve development	1/65	75/18805	0.0133333333333333	3.8574358974359	1.46028	0.229104020360723	0.323977403093899	0.258676694556065	CDH11	1	PT
GO:0003281	ventricular septum development	1/65	75/18805	0.0133333333333333	3.8574358974359	1.46028	0.229104020360723	0.323977403093899	0.258676694556065	WNT5A	1	PT
GO:0030239	myofibril assembly	1/65	75/18805	0.0133333333333333	3.8574358974359	1.46028	0.229104020360723	0.323977403093899	0.258676694556065	KRT19	1	PT
GO:0032088	negative regulation of NF-kappaB transcription factor activity	1/65	75/18805	0.0133333333333333	3.8574358974359	1.46028	0.229104020360723	0.323977403093899	0.258676694556065	TNFAIP3	1	PT
GO:0032411	positive regulation of transporter activity	1/65	75/18805	0.0133333333333333	3.8574358974359	1.46028	0.229104020360723	0.323977403093899	0.258676694556065	CALM2	1	PT
GO:0042490	mechanoreceptor differentiation	1/65	75/18805	0.0133333333333333	3.8574358974359	1.46028	0.229104020360723	0.323977403093899	0.258676694556065	CTHRC1	1	PT
GO:0042698	ovulation cycle	1/65	75/18805	0.0133333333333333	3.8574358974359	1.46028	0.229104020360723	0.323977403093899	0.258676694556065	INHBA	1	PT
GO:0051881	regulation of mitochondrial membrane potential	1/65	75/18805	0.0133333333333333	3.8574358974359	1.46028	0.229104020360723	0.323977403093899	0.258676694556065	SOD2	1	PT
GO:0071479	cellular response to ionizing radiation	1/65	75/18805	0.0133333333333333	3.8574358974359	1.46028	0.229104020360723	0.323977403093899	0.258676694556065	CCND2	1	PT
GO:0072527	pyrimidine-containing compound metabolic process	1/65	75/18805	0.0133333333333333	3.8574358974359	1.46028	0.229104020360723	0.323977403093899	0.258676694556065	TYMP	1	PT
GO:2000379	positive regulation of reactive oxygen species metabolic process	1/65	75/18805	0.0133333333333333	3.8574358974359	1.46028	0.229104020360723	0.323977403093899	0.258676694556065	SOD2	1	PT
GO:0001906	cell killing	2/65	263/18805	0.00760456273764259	2.20005849663644	1.15424767479684	0.230527443414765	0.325762786402581	0.260102216979527	CXCL14/CD59	2	PT
GO:0048525	negative regulation of viral process	1/65	76/18805	0.0131578947368421	3.80668016194332	1.44390770073592	0.231779313402718	0.326427436763701	0.260632900776631	CH25H	1	PT
GO:0050795	regulation of behavior	1/65	76/18805	0.0131578947368421	3.80668016194332	1.44390770073592	0.231779313402718	0.326427436763701	0.260632900776631	GRP	1	PT
GO:0072678	T cell migration	1/65	76/18805	0.0131578947368421	3.80668016194332	1.44390770073592	0.231779313402718	0.326427436763701	0.260632900776631	WNT5A	1	PT
GO:2000242	negative regulation of reproductive process	1/65	76/18805	0.0131578947368421	3.80668016194332	1.44390770073592	0.231779313402718	0.326427436763701	0.260632900776631	WNT5A	1	PT
GO:0072522	purine-containing compound biosynthetic process	2/65	264/18805	0.00757575757575758	2.19172494172494	1.14844029382767	0.231803779785778	0.326427436763701	0.260632900776631	NDUFA13/NNMT	2	PT
GO:0010876	lipid localization	3/65	482/18805	0.00622406639004149	1.80067028407277	1.04875959000438	0.232514126665653	0.327200212993708	0.261249916651507	FABP4/INHBA/FABP5	3	PT
GO:0006091	generation of precursor metabolites and energy	3/65	484/18805	0.00619834710743802	1.79322949777495	1.04122348628998	0.234348809204048	0.328320930630147	0.262144743052843	SOD2/NDUFA13/ALDH1L2	3	PT
GO:0006801	superoxide metabolic process	1/65	77/18805	0.012987012987013	3.75724275724276	1.42781412211816	0.234445464538861	0.328320930630147	0.262144743052843	SOD2	1	PT
GO:0009123	nucleoside monophosphate metabolic process	1/65	77/18805	0.012987012987013	3.75724275724276	1.42781412211816	0.234445464538861	0.328320930630147	0.262144743052843	TYMP	1	PT
GO:0009880	embryonic pattern specification	1/65	77/18805	0.012987012987013	3.75724275724276	1.42781412211816	0.234445464538861	0.328320930630147	0.262144743052843	WNT5A	1	PT
GO:0015844	monoamine transport	1/65	77/18805	0.012987012987013	3.75724275724276	1.42781412211816	0.234445464538861	0.328320930630147	0.262144743052843	GPM6B	1	PT
GO:0015986	proton motive force-driven ATP synthesis	1/65	77/18805	0.012987012987013	3.75724275724276	1.42781412211816	0.234445464538861	0.328320930630147	0.262144743052843	NDUFA13	1	PT
GO:0046470	phosphatidylcholine metabolic process	1/65	77/18805	0.012987012987013	3.75724275724276	1.42781412211816	0.234445464538861	0.328320930630147	0.262144743052843	FABP5	1	PT
GO:0007585	respiratory gaseous exchange by respiratory system	1/65	78/18805	0.0128205128205128	3.70907297830375	1.41198767818106	0.237102504522039	0.330442237892037	0.263838480780855	GRP	1	PT
GO:0010827	regulation of D-glucose transmembrane transport	1/65	78/18805	0.0128205128205128	3.70907297830375	1.41198767818106	0.237102504522039	0.330442237892037	0.263838480780855	FABP5	1	PT
GO:0019226	transmission of nerve impulse	1/65	78/18805	0.0128205128205128	3.70907297830375	1.41198767818106	0.237102504522039	0.330442237892037	0.263838480780855	TYMP	1	PT
GO:0032729	positive regulation of type II interferon production	1/65	78/18805	0.0128205128205128	3.70907297830375	1.41198767818106	0.237102504522039	0.330442237892037	0.263838480780855	WNT5A	1	PT
GO:0032890	regulation of organic acid transport	1/65	78/18805	0.0128205128205128	3.70907297830375	1.41198767818106	0.237102504522039	0.330442237892037	0.263838480780855	RGS4	1	PT
GO:0050853	B cell receptor signaling pathway	1/65	78/18805	0.0128205128205128	3.70907297830375	1.41198767818106	0.237102504522039	0.330442237892037	0.263838480780855	FOXP1	1	PT
GO:0071277	cellular response to calcium ion	1/65	78/18805	0.0128205128205128	3.70907297830375	1.41198767818106	0.237102504522039	0.330442237892037	0.263838480780855	WNT5A	1	PT
GO:1903522	regulation of blood circulation	2/65	269/18805	0.00743494423791822	2.15098655990849	1.11978691490558	0.238192591095298	0.331733147845927	0.264869195629029	CALM2/RGS4	2	PT
GO:0031397	negative regulation of protein ubiquitination	1/65	79/18805	0.0126582278481013	3.66212268743914	1.39642015678054	0.239750464003327	0.333215298288769	0.266052604637582	TNFAIP3	1	PT
GO:0051145	smooth muscle cell differentiation	1/65	79/18805	0.0126582278481013	3.66212268743914	1.39642015678054	0.239750464003327	0.333215298288769	0.266052604637582	SOD2	1	PT
GO:0055117	regulation of cardiac muscle contraction	1/65	79/18805	0.0126582278481013	3.66212268743914	1.39642015678054	0.239750464003327	0.333215298288769	0.266052604637582	CALM2	1	PT
GO:0003007	heart morphogenesis	2/65	272/18805	0.00735294117647059	2.12726244343891	1.10289364296692	0.242030930731312	0.335272186750637	0.267694907783745	WNT5A/FHL2	2	PT
GO:0006360	transcription by RNA polymerase I	1/65	80/18805	0.0125	3.61634615384615	1.38110370109599	0.242389373532312	0.335272186750637	0.267694907783745	CAVIN1	1	PT
GO:0006809	nitric oxide biosynthetic process	1/65	80/18805	0.0125	3.61634615384615	1.38110370109599	0.242389373532312	0.335272186750637	0.267694907783745	SOD2	1	PT
GO:0031016	pancreas development	1/65	80/18805	0.0125	3.61634615384615	1.38110370109599	0.242389373532312	0.335272186750637	0.267694907783745	WNT5A	1	PT
GO:0032720	negative regulation of tumor necrosis factor production	1/65	80/18805	0.0125	3.61634615384615	1.38110370109599	0.242389373532312	0.335272186750637	0.267694907783745	TNFAIP3	1	PT
GO:0045685	regulation of glial cell differentiation	1/65	80/18805	0.0125	3.61634615384615	1.38110370109599	0.242389373532312	0.335272186750637	0.267694907783745	CXCR4	1	PT
GO:0140962	multicellular organismal-level chemical homeostasis	1/65	80/18805	0.0125	3.61634615384615	1.38110370109599	0.242389373532312	0.335272186750637	0.267694907783745	SOD2	1	PT
GO:0071216	cellular response to biotic stimulus	2/65	273/18805	0.00732600732600733	2.11947027331643	1.09731104284529	0.243311112696541	0.336317408334809	0.268529455075902	TNFAIP3/WNT5A	2	PT
GO:0043434	response to peptide hormone	3/65	494/18805	0.00607287449392713	1.7569293055123	1.00406023906935	0.243562388835585	0.336435086897721	0.268623414411904	INHBA/TFF1/GJB2	3	PT
GO:0002752	cell surface pattern recognition receptor signaling pathway	1/65	81/18805	0.0123456790123457	3.57169990503324	1.36603078998625	0.245019263557434	0.337067940695518	0.269128710543634	TNFAIP3	1	PT
GO:0021536	diencephalon development	1/65	81/18805	0.0123456790123457	3.57169990503324	1.36603078998625	0.245019263557434	0.337067940695518	0.269128710543634	WNT5A	1	PT
GO:0043299	leukocyte degranulation	1/65	81/18805	0.0123456790123457	3.57169990503324	1.36603078998625	0.245019263557434	0.337067940695518	0.269128710543634	GRP	1	PT
GO:0043954	cellular component maintenance	1/65	81/18805	0.0123456790123457	3.57169990503324	1.36603078998625	0.245019263557434	0.337067940695518	0.269128710543634	FERMT2	1	PT
GO:0140238	presynaptic endocytosis	1/65	81/18805	0.0123456790123457	3.57169990503324	1.36603078998625	0.245019263557434	0.337067940695518	0.269128710543634	CALM2	1	PT
GO:1902807	negative regulation of cell cycle G1/S phase transition	1/65	81/18805	0.0123456790123457	3.57169990503324	1.36603078998625	0.245019263557434	0.337067940695518	0.269128710543634	INHBA	1	PT
GO:0051259	protein complex oligomerization	2/65	276/18805	0.0072463768115942	2.09643255295429	1.08070578909233	0.2471536206183	0.339290482383809	0.270903277942316	SOD2/COL1A2	2	PT
GO:0030500	regulation of bone mineralization	1/65	82/18805	0.0121951219512195	3.5281425891182	1.35119421966055	0.247640164426306	0.339290482383809	0.270903277942316	GPM6B	1	PT
GO:0030516	regulation of axon extension	1/65	82/18805	0.0121951219512195	3.5281425891182	1.35119421966055	0.247640164426306	0.339290482383809	0.270903277942316	WNT5A	1	PT
GO:0042246	tissue regeneration	1/65	82/18805	0.0121951219512195	3.5281425891182	1.35119421966055	0.247640164426306	0.339290482383809	0.270903277942316	POSTN	1	PT
GO:1903556	negative regulation of tumor necrosis factor superfamily cytokine production	1/65	82/18805	0.0121951219512195	3.5281425891182	1.35119421966055	0.247640164426306	0.339290482383809	0.270903277942316	TNFAIP3	1	PT
GO:1904427	positive regulation of calcium ion transmembrane transport	1/65	82/18805	0.0121951219512195	3.5281425891182	1.35119421966055	0.247640164426306	0.339290482383809	0.270903277942316	CALM2	1	PT
GO:1903829	positive regulation of protein localization	3/65	499/18805	0.00601202404809619	1.73932480345306	0.985793219367803	0.248192702877334	0.339817595217445	0.271324146200907	C1QTNF3/WNT5A/FERMT2	3	PT
GO:0060828	regulation of canonical Wnt signaling pathway	2/65	277/18805	0.0072202166064982	2.08886420438767	1.07521754083507	0.248435053199822	0.339919582925432	0.271405577322138	WNT5A/CTHRC1	2	PT
GO:0031424	keratinization	1/65	83/18805	0.0120481927710843	3.48563484708063	1.33658708656127	0.25025210638605	0.341713091997135	0.272837587684263	TCHH	1	PT
GO:0061053	somite development	1/65	83/18805	0.0120481927710843	3.48563484708063	1.33658708656127	0.25025210638605	0.341713091997135	0.272837587684263	WNT5A	1	PT
GO:0070098	chemokine-mediated signaling pathway	1/65	83/18805	0.0120481927710843	3.48563484708063	1.33658708656127	0.25025210638605	0.341713091997135	0.272837587684263	CXCR4	1	PT
GO:0008344	adult locomotory behavior	1/65	84/18805	0.0119047619047619	3.44413919413919	1.32220277136515	0.25285511958362	0.344338679997869	0.274933963600638	CCND2	1	PT
GO:0051279	regulation of release of sequestered calcium ion into cytosol	1/65	84/18805	0.0119047619047619	3.44413919413919	1.32220277136515	0.25285511958362	0.344338679997869	0.274933963600638	CALM2	1	PT
GO:0051952	regulation of amine transport	1/65	84/18805	0.0119047619047619	3.44413919413919	1.32220277136515	0.25285511958362	0.344338679997869	0.274933963600638	RGS4	1	PT
GO:0099068	postsynapse assembly	1/65	84/18805	0.0119047619047619	3.44413919413919	1.32220277136515	0.25285511958362	0.344338679997869	0.274933963600638	WNT5A	1	PT
GO:0002720	positive regulation of cytokine production involved in immune response	1/65	85/18805	0.0117647058823529	3.40361990950226	1.30803492401712	0.25544923406613	0.346009832096263	0.276268279194209	WNT5A	1	PT
GO:0006970	response to osmotic stress	1/65	85/18805	0.0117647058823529	3.40361990950226	1.30803492401712	0.25544923406613	0.346009832096263	0.276268279194209	TSC22D3	1	PT
GO:0007193	adenylate cyclase-inhibiting G protein-coupled receptor signaling pathway	1/65	85/18805	0.0117647058823529	3.40361990950226	1.30803492401712	0.25544923406613	0.346009832096263	0.276268279194209	AKAP12	1	PT
GO:0032418	lysosome localization	1/65	85/18805	0.0117647058823529	3.40361990950226	1.30803492401712	0.25544923406613	0.346009832096263	0.276268279194209	GRP	1	PT
GO:0035050	embryonic heart tube development	1/65	85/18805	0.0117647058823529	3.40361990950226	1.30803492401712	0.25544923406613	0.346009832096263	0.276268279194209	WNT5A	1	PT
GO:0046928	regulation of neurotransmitter secretion	1/65	85/18805	0.0117647058823529	3.40361990950226	1.30803492401712	0.25544923406613	0.346009832096263	0.276268279194209	PFN2	1	PT
GO:0051149	positive regulation of muscle cell differentiation	1/65	85/18805	0.0117647058823529	3.40361990950226	1.30803492401712	0.25544923406613	0.346009832096263	0.276268279194209	SOD2	1	PT
GO:0060337	type I interferon-mediated signaling pathway	1/65	85/18805	0.0117647058823529	3.40361990950226	1.30803492401712	0.25544923406613	0.346009832096263	0.276268279194209	WNT5A	1	PT
GO:0008625	extrinsic apoptotic signaling pathway via death domain receptors	1/65	86/18805	0.0116279069767442	3.36404293381038	1.29407744971907	0.258034479781178	0.347882704099125	0.277763656138405	TNFAIP3	1	PT
GO:0034248	regulation of amide metabolic process	1/65	86/18805	0.0116279069767442	3.36404293381038	1.29407744971907	0.258034479781178	0.347882704099125	0.277763656138405	SPHK1	1	PT
GO:0035023	regulation of Rho protein signal transduction	1/65	86/18805	0.0116279069767442	3.36404293381038	1.29407744971907	0.258034479781178	0.347882704099125	0.277763656138405	FERMT2	1	PT
GO:0042093	T-helper cell differentiation	1/65	86/18805	0.0116279069767442	3.36404293381038	1.29407744971907	0.258034479781178	0.347882704099125	0.277763656138405	FOXP1	1	PT
GO:0045913	positive regulation of carbohydrate metabolic process	1/65	86/18805	0.0116279069767442	3.36404293381038	1.29407744971907	0.258034479781178	0.347882704099125	0.277763656138405	NNMT	1	PT
GO:0071357	cellular response to type I interferon	1/65	86/18805	0.0116279069767442	3.36404293381038	1.29407744971907	0.258034479781178	0.347882704099125	0.277763656138405	WNT5A	1	PT
GO:1990849	vacuolar localization	1/65	86/18805	0.0116279069767442	3.36404293381038	1.29407744971907	0.258034479781178	0.347882704099125	0.277763656138405	GRP	1	PT
GO:0010721	negative regulation of cell development	2/65	285/18805	0.00701754385964912	2.0302294197031	1.03212641444308	0.258694824878459	0.348540931722474	0.278289211761258	INHBA/WNT5A	2	PT
GO:0001892	embryonic placenta development	1/65	87/18805	0.0114942528735632	3.32537577365164	1.28032449580199	0.260610886577173	0.349958252863909	0.279420858427012	KRT19	1	PT
GO:0007492	endoderm development	1/65	87/18805	0.0114942528735632	3.32537577365164	1.28032449580199	0.260610886577173	0.349958252863909	0.279420858427012	INHBA	1	PT
GO:0048678	response to axon injury	1/65	87/18805	0.0114942528735632	3.32537577365164	1.28032449580199	0.260610886577173	0.349958252863909	0.279420858427012	SOD2	1	PT
GO:0052547	regulation of peptidase activity	1/65	87/18805	0.0114942528735632	3.32537577365164	1.28032449580199	0.260610886577173	0.349958252863909	0.279420858427012	TIMP3	1	PT
GO:0150076	neuroinflammatory response	1/65	87/18805	0.0114942528735632	3.32537577365164	1.28032449580199	0.260610886577173	0.349958252863909	0.279420858427012	SPHK1	1	PT
GO:0042113	B cell activation	2/65	287/18805	0.00696864111498258	2.01608147949611	1.02157310372895	0.261261472200364	0.350599391123749	0.279932769209138	TNFAIP3/INHBA	2	PT
GO:0002294	CD4-positive, alpha-beta T cell differentiation involved in immune response	1/65	88/18805	0.0113636363636364	3.28758741258741	1.26677043941657	0.263178484203655	0.351078017465349	0.280314923886564	FOXP1	1	PT
GO:0007422	peripheral nervous system development	1/65	88/18805	0.0113636363636364	3.28758741258741	1.26677043941657	0.263178484203655	0.351078017465349	0.280314923886564	ETV1	1	PT
GO:0010232	vascular transport	1/65	88/18805	0.0113636363636364	3.28758741258741	1.26677043941657	0.263178484203655	0.351078017465349	0.280314923886564	FABP5	1	PT
GO:0034103	regulation of tissue remodeling	1/65	88/18805	0.0113636363636364	3.28758741258741	1.26677043941657	0.263178484203655	0.351078017465349	0.280314923886564	TNFAIP3	1	PT
GO:0035418	protein localization to synapse	1/65	88/18805	0.0113636363636364	3.28758741258741	1.26677043941657	0.263178484203655	0.351078017465349	0.280314923886564	WNT5A	1	PT
GO:0046209	nitric oxide metabolic process	1/65	88/18805	0.0113636363636364	3.28758741258741	1.26677043941657	0.263178484203655	0.351078017465349	0.280314923886564	SOD2	1	PT
GO:0071347	cellular response to interleukin-1	1/65	88/18805	0.0113636363636364	3.28758741258741	1.26677043941657	0.263178484203655	0.351078017465349	0.280314923886564	AKAP12	1	PT
GO:0072665	protein localization to vacuole	1/65	88/18805	0.0113636363636364	3.28758741258741	1.26677043941657	0.263178484203655	0.351078017465349	0.280314923886564	TNFAIP3	1	PT
GO:0150104	transport across blood-brain barrier	1/65	88/18805	0.0113636363636364	3.28758741258741	1.26677043941657	0.263178484203655	0.351078017465349	0.280314923886564	FABP5	1	PT
GO:0002287	alpha-beta T cell activation involved in immune response	1/65	89/18805	0.0112359550561798	3.25064822817632	1.25340987598234	0.265737302311618	0.353095824921934	0.281926023173536	FOXP1	1	PT
GO:0002293	alpha-beta T cell differentiation involved in immune response	1/65	89/18805	0.0112359550561798	3.25064822817632	1.25340987598234	0.265737302311618	0.353095824921934	0.281926023173536	FOXP1	1	PT
GO:0009791	post-embryonic development	1/65	89/18805	0.0112359550561798	3.25064822817632	1.25340987598234	0.265737302311618	0.353095824921934	0.281926023173536	SOD2	1	PT
GO:0033627	cell adhesion mediated by integrin	1/65	89/18805	0.0112359550561798	3.25064822817632	1.25340987598234	0.265737302311618	0.353095824921934	0.281926023173536	PLPP3	1	PT
GO:0042310	vasoconstriction	1/65	89/18805	0.0112359550561798	3.25064822817632	1.25340987598234	0.265737302311618	0.353095824921934	0.281926023173536	ACTA2	1	PT
GO:0043543	protein acylation	1/65	89/18805	0.0112359550561798	3.25064822817632	1.25340987598234	0.265737302311618	0.353095824921934	0.281926023173536	SPHK1	1	PT
GO:0061448	connective tissue development	2/65	291/18805	0.00687285223367698	1.98836901929685	1.00071980517537	0.266395911834224	0.353738833747085	0.28243942749085	ACTA2/WNT5A	2	PT
GO:0061515	myeloid cell development	1/65	90/18805	0.0111111111111111	3.21452991452991	1.24023760834064	0.268287370453836	0.355783840975127	0.284072244178191	FOXP1	1	PT
GO:2001057	reactive nitrogen species metabolic process	1/65	90/18805	0.0111111111111111	3.21452991452991	1.24023760834064	0.268287370453836	0.355783840975127	0.284072244178191	SOD2	1	PT
GO:0048708	astrocyte differentiation	1/65	91/18805	0.010989010989011	3.17920540997464	1.2272486365614	0.270828718085175	0.358918949033036	0.286575441567118	PLPP3	1	PT
GO:0019058	viral life cycle	2/65	295/18805	0.00677966101694915	1.96140808344198	0.980195206293866	0.271531045949137	0.359379325520917	0.286943024821379	CXCR4/CH25H	2	PT
GO:0045165	cell fate commitment	2/65	295/18805	0.00677966101694915	1.96140808344198	0.980195206293866	0.271531045949137	0.359379325520917	0.286943024821379	WNT5A/TGFB1I1	2	PT
GO:0007548	sex differentiation	2/65	296/18805	0.00675675675675676	1.9547817047817	0.975114181750643	0.272814823095758	0.35991988523401	0.287374629613743	INHBA/WNT5A	2	PT
GO:0002088	lens development in camera-type eye	1/65	92/18805	0.0108695652173913	3.14464882943144	1.2144381483573	0.273361374562917	0.35991988523401	0.287374629613743	WNT5A	1	PT
GO:0032273	positive regulation of protein polymerization	1/65	92/18805	0.0108695652173913	3.14464882943144	1.2144381483573	0.273361374562917	0.35991988523401	0.287374629613743	PFN2	1	PT
GO:0071230	cellular response to amino acid stimulus	1/65	92/18805	0.0108695652173913	3.14464882943144	1.2144381483573	0.273361374562917	0.35991988523401	0.287374629613743	COL1A2	1	PT
GO:1903321	negative regulation of protein modification by small protein conjugation or removal	1/65	92/18805	0.0108695652173913	3.14464882943144	1.2144381483573	0.273361374562917	0.35991988523401	0.287374629613743	TNFAIP3	1	PT
GO:1990868	response to chemokine	1/65	92/18805	0.0108695652173913	3.14464882943144	1.2144381483573	0.273361374562917	0.35991988523401	0.287374629613743	CXCR4	1	PT
GO:1990869	cellular response to chemokine	1/65	92/18805	0.0108695652173913	3.14464882943144	1.2144381483573	0.273361374562917	0.35991988523401	0.287374629613743	CXCR4	1	PT
GO:2000177	regulation of neural precursor cell proliferation	1/65	92/18805	0.0108695652173913	3.14464882943144	1.2144381483573	0.273361374562917	0.35991988523401	0.287374629613743	WNT5A	1	PT
GO:0097194	execution phase of apoptosis	1/65	93/18805	0.010752688172043	3.11083540115798	1.20180151006318	0.275885369147078	0.363007064667208	0.289839558845396	NDUFA13	1	PT
GO:0043122	regulation of canonical NF-kappaB signal transduction	2/65	300/18805	0.00666666666666667	1.92871794871795	0.954985830644651	0.277949456493016	0.3646581373069	0.291157842185003	TNFAIP3/WNT5A	2	PT
GO:0014910	regulation of smooth muscle cell migration	1/65	94/18805	0.0106382978723404	3.07774140752864	1.18933425814144	0.278400731000725	0.3646581373069	0.291157842185003	POSTN	1	PT
GO:0042475	odontogenesis of dentin-containing tooth	1/65	94/18805	0.0106382978723404	3.07774140752864	1.18933425814144	0.278400731000725	0.3646581373069	0.291157842185003	APCDD1	1	PT
GO:0140115	export across plasma membrane	1/65	94/18805	0.0106382978723404	3.07774140752864	1.18933425814144	0.278400731000725	0.3646581373069	0.291157842185003	CALM2	1	PT
GO:1900182	positive regulation of protein localization to nucleus	1/65	94/18805	0.0106382978723404	3.07774140752864	1.18933425814144	0.278400731000725	0.3646581373069	0.291157842185003	FERMT2	1	PT
GO:1904705	regulation of vascular associated smooth muscle cell proliferation	1/65	94/18805	0.0106382978723404	3.07774140752864	1.18933425814144	0.278400731000725	0.3646581373069	0.291157842185003	SOD2	1	PT
GO:2000278	regulation of DNA biosynthetic process	1/65	94/18805	0.0106382978723404	3.07774140752864	1.18933425814144	0.278400731000725	0.3646581373069	0.291157842185003	SMOC2	1	PT
GO:0032465	regulation of cytokinesis	1/65	95/18805	0.0105263157894737	3.04534412955466	1.17703209117775	0.28090748919029	0.367228964241664	0.293210494645976	CALM2	1	PT
GO:0038084	vascular endothelial growth factor signaling pathway	1/65	95/18805	0.0105263157894737	3.04534412955466	1.17703209117775	0.28090748919029	0.367228964241664	0.293210494645976	SMOC2	1	PT
GO:0071677	positive regulation of mononuclear cell migration	1/65	95/18805	0.0105263157894737	3.04534412955466	1.17703209117775	0.28090748919029	0.367228964241664	0.293210494645976	WNT5A	1	PT
GO:0002690	positive regulation of leukocyte chemotaxis	1/65	96/18805	0.0104166666666667	3.01362179487179	1.16489086233361	0.283405672685888	0.369778664425852	0.295246278652688	WNT5A	1	PT
GO:1901874	negative regulation of post-translational protein modification	1/65	96/18805	0.0104166666666667	3.01362179487179	1.16489086233361	0.283405672685888	0.369778664425852	0.295246278652688	TNFAIP3	1	PT
GO:1990874	vascular associated smooth muscle cell proliferation	1/65	96/18805	0.0104166666666667	3.01362179487179	1.16489086233361	0.283405672685888	0.369778664425852	0.295246278652688	SOD2	1	PT
GO:0002292	T cell differentiation involved in immune response	1/65	97/18805	0.0103092783505155	2.98255352894528	1.15290657222552	0.285895310361628	0.371829160874949	0.296883478156684	FOXP1	1	PT
GO:0015837	amine transport	1/65	97/18805	0.0103092783505155	2.98255352894528	1.15290657222552	0.285895310361628	0.371829160874949	0.296883478156684	RGS4	1	PT
GO:0033555	multicellular organismal response to stress	1/65	97/18805	0.0103092783505155	2.98255352894528	1.15290657222552	0.285895310361628	0.371829160874949	0.296883478156684	GRP	1	PT
GO:0046330	positive regulation of JNK cascade	1/65	97/18805	0.0103092783505155	2.98255352894528	1.15290657222552	0.285895310361628	0.371829160874949	0.296883478156684	WNT5A	1	PT
GO:0061337	cardiac conduction	1/65	97/18805	0.0103092783505155	2.98255352894528	1.15290657222552	0.285895310361628	0.371829160874949	0.296883478156684	CALM2	1	PT
GO:0031348	negative regulation of defense response	2/65	308/18805	0.00649350649350649	1.87862137862138	0.915637313748625	0.288213412805895	0.374334790235099	0.298884074230597	TNFAIP3/C1QTNF3	2	PT
GO:0002275	myeloid cell activation involved in immune response	1/65	98/18805	0.0102040816326531	2.95211930926217	1.1410753622022	0.288376430995928	0.374334790235099	0.298884074230597	GRP	1	PT
GO:0071346	cellular response to type II interferon	1/65	98/18805	0.0102040816326531	2.95211930926217	1.1410753622022	0.288376430995928	0.374334790235099	0.298884074230597	WNT5A	1	PT
GO:0006959	humoral immune response	2/65	309/18805	0.00647249190938511	1.87254169778442	0.910801061755157	0.289495632144182	0.375306437318802	0.299659876658443	CXCL14/CD59	2	PT
GO:0030100	regulation of endocytosis	2/65	309/18805	0.00647249190938511	1.87254169778442	0.910801061755157	0.289495632144182	0.375306437318802	0.299659876658443	WNT5A/SPHK1	2	PT
GO:0009798	axis specification	1/65	99/18805	0.0101010101010101	2.92229992229992	1.1293935079941	0.290849063271828	0.376338244808596	0.300483713593764	WNT5A	1	PT
GO:0042982	amyloid precursor protein metabolic process	1/65	99/18805	0.0101010101010101	2.92229992229992	1.1293935079941	0.290849063271828	0.376338244808596	0.300483713593764	BACE1	1	PT
GO:0061387	regulation of extent of cell growth	1/65	99/18805	0.0101010101010101	2.92229992229992	1.1293935079941	0.290849063271828	0.376338244808596	0.300483713593764	WNT5A	1	PT
GO:0002220	innate immune response activating cell surface receptor signaling pathway	1/65	100/18805	0.01	2.89307692307692	1.11785741371068	0.293313235777298	0.377356608925686	0.301296816795245	TNFAIP3	1	PT
GO:0006754	ATP biosynthetic process	1/65	100/18805	0.01	2.89307692307692	1.11785741371068	0.293313235777298	0.377356608925686	0.301296816795245	NDUFA13	1	PT
GO:0043648	dicarboxylic acid metabolic process	1/65	100/18805	0.01	2.89307692307692	1.11785741371068	0.293313235777298	0.377356608925686	0.301296816795245	ALDH1L2	1	PT
GO:0045638	negative regulation of myeloid cell differentiation	1/65	100/18805	0.01	2.89307692307692	1.11785741371068	0.293313235777298	0.377356608925686	0.301296816795245	INHBA	1	PT
GO:0045824	negative regulation of innate immune response	1/65	100/18805	0.01	2.89307692307692	1.11785741371068	0.293313235777298	0.377356608925686	0.301296816795245	TNFAIP3	1	PT
GO:0051262	protein tetramerization	1/65	100/18805	0.01	2.89307692307692	1.11785741371068	0.293313235777298	0.377356608925686	0.301296816795245	SOD2	1	PT
GO:0051346	negative regulation of hydrolase activity	1/65	100/18805	0.01	2.89307692307692	1.11785741371068	0.293313235777298	0.377356608925686	0.301296816795245	TIMP3	1	PT
GO:0070664	negative regulation of leukocyte proliferation	1/65	100/18805	0.01	2.89307692307692	1.11785741371068	0.293313235777298	0.377356608925686	0.301296816795245	TNFAIP3	1	PT
GO:0070936	protein K48-linked ubiquitination	1/65	100/18805	0.01	2.89307692307692	1.11785741371068	0.293313235777298	0.377356608925686	0.301296816795245	TNFAIP3	1	PT
GO:0006942	regulation of striated muscle contraction	1/65	101/18805	0.0099009900990099	2.86443259710586	1.10646360616349	0.295768977005552	0.379242999032521	0.302802987141755	CALM2	1	PT
GO:0014909	smooth muscle cell migration	1/65	101/18805	0.0099009900990099	2.86443259710586	1.10646360616349	0.295768977005552	0.379242999032521	0.302802987141755	POSTN	1	PT
GO:0034109	homotypic cell-cell adhesion	1/65	101/18805	0.0099009900990099	2.86443259710586	1.10646360616349	0.295768977005552	0.379242999032521	0.302802987141755	PLPP3	1	PT
GO:0048661	positive regulation of smooth muscle cell proliferation	1/65	101/18805	0.0099009900990099	2.86443259710586	1.10646360616349	0.295768977005552	0.379242999032521	0.302802987141755	FOXP1	1	PT
GO:0071229	cellular response to acid chemical	1/65	101/18805	0.0099009900990099	2.86443259710586	1.10646360616349	0.295768977005552	0.379242999032521	0.302802987141755	COL1A2	1	PT
GO:0048608	reproductive structure development	2/65	314/18805	0.00636942675159236	1.84272415482607	0.886884517141934	0.295903179492041	0.379242999032521	0.302802987141755	INHBA/WNT5A	2	PT
GO:0016079	synaptic vesicle exocytosis	1/65	102/18805	0.00980392156862745	2.83634992458522	1.09521	0.298216315355351	0.380521763449644	0.303824004500925	PFN2	1	PT
GO:0032755	positive regulation of interleukin-6 production	1/65	102/18805	0.00980392156862745	2.83634992458522	1.09521	0.298216315355351	0.380521763449644	0.303824004500925	WNT5A	1	PT
GO:0035282	segmentation	1/65	102/18805	0.00980392156862745	2.83634992458522	1.09521	0.298216315355351	0.380521763449644	0.303824004500925	WNT5A	1	PT
GO:0043279	response to alkaloid	1/65	102/18805	0.00980392156862745	2.83634992458522	1.09521	0.298216315355351	0.380521763449644	0.303824004500925	RGS4	1	PT
GO:0048009	insulin-like growth factor receptor signaling pathway	1/65	102/18805	0.00980392156862745	2.83634992458522	1.09521	0.298216315355351	0.380521763449644	0.303824004500925	CILP	1	PT
GO:0050764	regulation of phagocytosis	1/65	102/18805	0.00980392156862745	2.83634992458522	1.09521	0.298216315355351	0.380521763449644	0.303824004500925	SPHK1	1	PT
GO:2001237	negative regulation of extrinsic apoptotic signaling pathway	1/65	102/18805	0.00980392156862745	2.83634992458522	1.09521	0.298216315355351	0.380521763449644	0.303824004500925	TNFAIP3	1	PT
GO:0043491	phosphatidylinositol 3-kinase/protein kinase B signal transduction	2/65	316/18805	0.00632911392405063	1.83106134371957	0.877438968531351	0.298464291675041	0.380598356827429	0.303885159759289	COL6A3/FERMT2	2	PT
GO:0070167	regulation of biomineral tissue development	1/65	103/18805	0.00970873786407767	2.80881254667662	1.08408954008722	0.300655279131317	0.383138853600081	0.30591359538907	GPM6B	1	PT
GO:0007249	canonical NF-kappaB signal transduction	2/65	318/18805	0.00628930817610063	1.81954523463957	0.868061060470076	0.301024156087767	0.383138853600081	0.30591359538907	TNFAIP3/WNT5A	2	PT
GO:0061458	reproductive system development	2/65	318/18805	0.00628930817610063	1.81954523463957	0.868061060470076	0.301024156087767	0.383138853600081	0.30591359538907	INHBA/WNT5A	2	PT
GO:0002366	leukocyte activation involved in immune response	2/65	319/18805	0.00626959247648903	1.81384133108271	0.863397159008293	0.302303587994363	0.384525606588307	0.307020835201892	GRP/FOXP1	2	PT
GO:0008593	regulation of Notch signaling pathway	1/65	105/18805	0.00952380952380952	2.75531135531136	1.06224578115986	0.305508195711376	0.387385157367274	0.309304016486619	POSTN	1	PT
GO:0009062	fatty acid catabolic process	1/65	105/18805	0.00952380952380952	2.75531135531136	1.06224578115986	0.305508195711376	0.387385157367274	0.309304016486619	ALDH1L2	1	PT
GO:0032637	interleukin-8 production	1/65	105/18805	0.00952380952380952	2.75531135531136	1.06224578115986	0.305508195711376	0.387385157367274	0.309304016486619	WNT5A	1	PT
GO:0032677	regulation of interleukin-8 production	1/65	105/18805	0.00952380952380952	2.75531135531136	1.06224578115986	0.305508195711376	0.387385157367274	0.309304016486619	WNT5A	1	PT
GO:1901992	positive regulation of mitotic cell cycle phase transition	1/65	105/18805	0.00952380952380952	2.75531135531136	1.06224578115986	0.305508195711376	0.387385157367274	0.309304016486619	CCND2	1	PT
GO:1901293	nucleoside phosphate biosynthetic process	2/65	322/18805	0.0062111801242236	1.79694218824654	0.849504196028394	0.306139729228559	0.387943023584375	0.309749439493489	NDUFA13/NNMT	2	PT
GO:0002263	cell activation involved in immune response	2/65	323/18805	0.00619195046439629	1.79137889973803	0.844905721686142	0.307417682753514	0.389227505886359	0.310775022243767	GRP/FOXP1	2	PT
GO:0008585	female gonad development	1/65	106/18805	0.00943396226415094	2.72931785195936	1.05151524350168	0.307922204656764	0.389227505886359	0.310775022243767	INHBA	1	PT
GO:0008630	intrinsic apoptotic signaling pathway in response to DNA damage	1/65	106/18805	0.00943396226415094	2.72931785195936	1.05151524350168	0.307922204656764	0.389227505886359	0.310775022243767	SOD2	1	PT
GO:2000060	positive regulation of ubiquitin-dependent protein catabolic process	1/65	106/18805	0.00943396226415094	2.72931785195936	1.05151524350168	0.307922204656764	0.389227505886359	0.310775022243767	TGFB1I1	1	PT
GO:0001822	kidney development	2/65	325/18805	0.00615384615384615	1.7803550295858	0.83575683533723	0.309972374700062	0.391047978472826	0.312228561369336	ACTA2/WNT5A	2	PT
GO:0008637	apoptotic mitochondrial changes	1/65	107/18805	0.00934579439252336	2.70381020848311	1.04090844839025	0.310327951311521	0.391047978472826	0.312228561369336	SOD2	1	PT
GO:0019395	fatty acid oxidation	1/65	107/18805	0.00934579439252336	2.70381020848311	1.04090844839025	0.310327951311521	0.391047978472826	0.312228561369336	ALDH1L2	1	PT
GO:0043367	CD4-positive, alpha-beta T cell differentiation	1/65	107/18805	0.00934579439252336	2.70381020848311	1.04090844839025	0.310327951311521	0.391047978472826	0.312228561369336	FOXP1	1	PT
GO:0045639	positive regulation of myeloid cell differentiation	1/65	107/18805	0.00934579439252336	2.70381020848311	1.04090844839025	0.310327951311521	0.391047978472826	0.312228561369336	INHBA	1	PT
GO:0001938	positive regulation of endothelial cell proliferation	1/65	108/18805	0.00925925925925926	2.67877492877493	1.03042264595297	0.31272546351415	0.393334822121835	0.314054470060631	WNT5A	1	PT
GO:0006626	protein targeting to mitochondrion	1/65	108/18805	0.00925925925925926	2.67877492877493	1.03042264595297	0.31272546351415	0.393334822121835	0.314054470060631	NDUFA13	1	PT
GO:0021549	cerebellum development	1/65	108/18805	0.00925925925925926	2.67877492877493	1.03042264595297	0.31272546351415	0.393334822121835	0.314054470060631	CNTN1	1	PT
GO:0003333	amino acid transmembrane transport	1/65	109/18805	0.00917431192660551	2.65419901199718	1.02005517312781	0.315114769010839	0.395357749223636	0.315669657079925	RGS4	1	PT
GO:0019217	regulation of fatty acid metabolic process	1/65	109/18805	0.00917431192660551	2.65419901199718	1.02005517312781	0.315114769010839	0.395357749223636	0.315669657079925	FABP5	1	PT
GO:0043405	regulation of MAP kinase activity	1/65	109/18805	0.00917431192660551	2.65419901199718	1.02005517312781	0.315114769010839	0.395357749223636	0.315669657079925	WNT5A	1	PT
GO:0060079	excitatory postsynaptic potential	1/65	109/18805	0.00917431192660551	2.65419901199718	1.02005517312781	0.315114769010839	0.395357749223636	0.315669657079925	RGS4	1	PT
GO:0097193	intrinsic apoptotic signaling pathway	2/65	330/18805	0.00606060606060606	1.75337995337995	0.813159635699426	0.316351446126883	0.396663577960953	0.316712283689681	SOD2/HSPE1	2	PT
GO:0031341	regulation of cell killing	1/65	110/18805	0.00909090909090909	2.63006993006993	1.00980345014245	0.317495895455763	0.39711500203701	0.317072718975359	CD59	1	PT
GO:0031398	positive regulation of protein ubiquitination	1/65	110/18805	0.00909090909090909	2.63006993006993	1.00980345014245	0.317495895455763	0.39711500203701	0.317072718975359	SPHK1	1	PT
GO:0046545	development of primary female sexual characteristics	1/65	110/18805	0.00909090909090909	2.63006993006993	1.00980345014245	0.317495895455763	0.39711500203701	0.317072718975359	INHBA	1	PT
GO:0048675	axon extension	1/65	110/18805	0.00909090909090909	2.63006993006993	1.00980345014245	0.317495895455763	0.39711500203701	0.317072718975359	WNT5A	1	PT
GO:0001676	long-chain fatty acid metabolic process	1/65	111/18805	0.00900900900900901	2.60637560637561	0.999664977167038	0.319868870411386	0.398851270063458	0.318459025766067	CTHRC1	1	PT
GO:0003279	cardiac septum development	1/65	111/18805	0.00900900900900901	2.60637560637561	0.999664977167038	0.319868870411386	0.398851270063458	0.318459025766067	WNT5A	1	PT
GO:0009206	purine ribonucleoside triphosphate biosynthetic process	1/65	111/18805	0.00900900900900901	2.60637560637561	0.999664977167038	0.319868870411386	0.398851270063458	0.318459025766067	NDUFA13	1	PT
GO:0042632	cholesterol homeostasis	1/65	111/18805	0.00900900900900901	2.60637560637561	0.999664977167038	0.319868870411386	0.398851270063458	0.318459025766067	FABP4	1	PT
GO:0060291	long-term synaptic potentiation	1/65	111/18805	0.00900900900900901	2.60637560637561	0.999664977167038	0.319868870411386	0.398851270063458	0.318459025766067	CALB2	1	PT
GO:0060070	canonical Wnt signaling pathway	2/65	333/18805	0.00600600600600601	1.73758373758374	0.799785444123487	0.320173158117767	0.398985012423679	0.318565811089159	WNT5A/CTHRC1	2	PT
GO:0046394	carboxylic acid biosynthetic process	2/65	334/18805	0.00598802395209581	1.73238139106403	0.795357418897202	0.321446036473178	0.399341056139068	0.318850090827607	CTHRC1/FABP5	2	PT
GO:0009145	purine nucleoside triphosphate biosynthetic process	1/65	112/18805	0.00892857142857143	2.5831043956044	0.989637331130565	0.322233721348759	0.399341056139068	0.318850090827607	NDUFA13	1	PT
GO:0014013	regulation of gliogenesis	1/65	112/18805	0.00892857142857143	2.5831043956044	0.989637331130565	0.322233721348759	0.399341056139068	0.318850090827607	CXCR4	1	PT
GO:0019218	regulation of steroid metabolic process	1/65	112/18805	0.00892857142857143	2.5831043956044	0.989637331130565	0.322233721348759	0.399341056139068	0.318850090827607	CH25H	1	PT
GO:0055092	sterol homeostasis	1/65	112/18805	0.00892857142857143	2.5831043956044	0.989637331130565	0.322233721348759	0.399341056139068	0.318850090827607	FABP4	1	PT
GO:0140888	interferon-mediated signaling pathway	1/65	112/18805	0.00892857142857143	2.5831043956044	0.989637331130565	0.322233721348759	0.399341056139068	0.318850090827607	WNT5A	1	PT
GO:1901890	positive regulation of cell junction assembly	1/65	112/18805	0.00892857142857143	2.5831043956044	0.989637331130565	0.322233721348759	0.399341056139068	0.318850090827607	FERMT2	1	PT
GO:1904659	D-glucose transmembrane transport	1/65	112/18805	0.00892857142857143	2.5831043956044	0.989637331130565	0.322233721348759	0.399341056139068	0.318850090827607	FABP5	1	PT
GO:2001243	negative regulation of intrinsic apoptotic signaling pathway	1/65	112/18805	0.00892857142857143	2.5831043956044	0.989637331130565	0.322233721348759	0.399341056139068	0.318850090827607	SOD2	1	PT
GO:0008202	steroid metabolic process	2/65	335/18805	0.00597014925373134	1.72721010332951	0.790944237182309	0.322718382776276	0.399697079585296	0.319134354382334	INHBA/CH25H	2	PT
GO:0072001	renal system development	2/65	336/18805	0.00595238095238095	1.7220695970696	0.786545795098528	0.323990185613111	0.40102697180107	0.320196194248963	ACTA2/WNT5A	2	PT
GO:0030316	osteoclast differentiation	1/65	113/18805	0.00884955752212389	2.56024506466984	0.979718162691388	0.324590475647819	0.401034602310454	0.320202286757041	FOXP1	1	PT
GO:0043473	pigmentation	1/65	113/18805	0.00884955752212389	2.56024506466984	0.979718162691388	0.324590475647819	0.401034602310454	0.320202286757041	SOD2	1	PT
GO:0090277	positive regulation of peptide hormone secretion	1/65	113/18805	0.00884955752212389	2.56024506466984	0.979718162691388	0.324590475647819	0.401034602310454	0.320202286757041	GRP	1	PT
GO:0016053	organic acid biosynthetic process	2/65	337/18805	0.00593471810089021	1.71695959826524	0.782161989814312	0.325261433652458	0.401618538503797	0.320668525089971	CTHRC1/FABP5	2	PT
GO:0007218	neuropeptide signaling pathway	1/65	114/18805	0.0087719298245614	2.53778677462888	0.969905193353224	0.326939160597685	0.402953012909502	0.321734023562831	GRP	1	PT
GO:0030148	sphingolipid biosynthetic process	1/65	114/18805	0.0087719298245614	2.53778677462888	0.969905193353224	0.326939160597685	0.402953012909502	0.321734023562831	SPHK1	1	PT
GO:0034440	lipid oxidation	1/65	114/18805	0.0087719298245614	2.53778677462888	0.969905193353224	0.326939160597685	0.402953012909502	0.321734023562831	ALDH1L2	1	PT
GO:0002429	immune response-activating cell surface receptor signaling pathway	2/65	340/18805	0.00588235294117647	1.70180995475113	0.769097381887507	0.3290717369054	0.404606554538127	0.323054278243308	TNFAIP3/FOXP1	2	PT
GO:1902105	regulation of leukocyte differentiation	2/65	340/18805	0.00588235294117647	1.70180995475113	0.769097381887507	0.3290717369054	0.404606554538127	0.323054278243308	INHBA/FOXP1	2	PT
GO:0002793	positive regulation of peptide secretion	1/65	115/18805	0.00869565217391304	2.51571906354515	0.960196212718364	0.329279803396955	0.404606554538127	0.323054278243308	GRP	1	PT
GO:0014812	muscle cell migration	1/65	115/18805	0.00869565217391304	2.51571906354515	0.960196212718364	0.329279803396955	0.404606554538127	0.323054278243308	POSTN	1	PT
GO:1903900	regulation of viral life cycle	1/65	115/18805	0.00869565217391304	2.51571906354515	0.960196212718364	0.329279803396955	0.404606554538127	0.323054278243308	CH25H	1	PT
GO:0002444	myeloid leukocyte mediated immunity	1/65	116/18805	0.00862068965517241	2.49403183023873	0.950589075870448	0.331612431154001	0.406486182255964	0.324555049224255	GRP	1	PT
GO:0050731	positive regulation of peptidyl-tyrosine phosphorylation	1/65	116/18805	0.00862068965517241	2.49403183023873	0.950589075870448	0.331612431154001	0.406486182255964	0.324555049224255	PLPP3	1	PT
GO:0070252	actin-mediated cell contraction	1/65	116/18805	0.00862068965517241	2.49403183023873	0.950589075870448	0.331612431154001	0.406486182255964	0.324555049224255	ACTA2	1	PT
GO:0070555	response to interleukin-1	1/65	116/18805	0.00862068965517241	2.49403183023873	0.950589075870448	0.331612431154001	0.406486182255964	0.324555049224255	AKAP12	1	PT
GO:0009201	ribonucleoside triphosphate biosynthetic process	1/65	117/18805	0.00854700854700855	2.47271531886917	0.941081700879636	0.333937070887266	0.408346961682798	0.326040770965447	NDUFA13	1	PT
GO:0019882	antigen processing and presentation	1/65	117/18805	0.00854700854700855	2.47271531886917	0.941081700879636	0.333937070887266	0.408346961682798	0.326040770965447	HLA-DMA	1	PT
GO:0022904	respiratory electron transport chain	1/65	117/18805	0.00854700854700855	2.47271531886917	0.941081700879636	0.333937070887266	0.408346961682798	0.326040770965447	SOD2	1	PT
GO:0051928	positive regulation of calcium ion transport	1/65	117/18805	0.00854700854700855	2.47271531886917	0.941081700879636	0.333937070887266	0.408346961682798	0.326040770965447	CALM2	1	PT
GO:0022037	metencephalon development	1/65	118/18805	0.00847457627118644	2.45176010430248	0.931672066423442	0.336253749525554	0.410436312712024	0.327708993541608	CNTN1	1	PT
GO:0042177	negative regulation of protein catabolic process	1/65	118/18805	0.00847457627118644	2.45176010430248	0.931672066423442	0.336253749525554	0.410436312712024	0.327708993541608	TIMP3	1	PT
GO:0099565	chemical synaptic transmission, postsynaptic	1/65	118/18805	0.00847457627118644	2.45176010430248	0.931672066423442	0.336253749525554	0.410436312712024	0.327708993541608	RGS4	1	PT
GO:0030518	nuclear receptor-mediated steroid hormone signaling pathway	1/65	119/18805	0.00840336134453781	2.4311570782159	0.922358209516937	0.338562493908325	0.412508453769169	0.329363474978268	FOXP1	1	PT
GO:0031640	killing of cells of another organism	1/65	119/18805	0.00840336134453781	2.4311570782159	0.922358209516937	0.338562493908325	0.412508453769169	0.329363474978268	CXCL14	1	PT
GO:0141061	disruption of cell in another organism	1/65	119/18805	0.00840336134453781	2.4311570782159	0.922358209516937	0.338562493908325	0.412508453769169	0.329363474978268	CXCL14	1	PT
GO:0007006	mitochondrial membrane organization	1/65	120/18805	0.00833333333333333	2.41089743589744	0.913138223346419	0.340863330785985	0.414314672774082	0.330805633466401	NDUFA13	1	PT
GO:0015695	organic cation transport	1/65	120/18805	0.00833333333333333	2.41089743589744	0.913138223346419	0.340863330785985	0.414314672774082	0.330805633466401	RGS4	1	PT
GO:0016579	protein deubiquitination	1/65	120/18805	0.00833333333333333	2.41089743589744	0.913138223346419	0.340863330785985	0.414314672774082	0.330805633466401	TNFAIP3	1	PT
GO:1902106	negative regulation of leukocyte differentiation	1/65	120/18805	0.00833333333333333	2.41089743589744	0.913138223346419	0.340863330785985	0.414314672774082	0.330805633466401	INHBA	1	PT
GO:0007088	regulation of mitotic nuclear division	1/65	121/18805	0.00826446280991736	2.39097266369994	0.90401	0.343156286820179	0.416351995692548	0.33243231468941	SPHK1	1	PT
GO:0008645	hexose transmembrane transport	1/65	121/18805	0.00826446280991736	2.39097266369994	0.90401	0.343156286820179	0.416351995692548	0.33243231468941	FABP5	1	PT
GO:0034341	response to type II interferon	1/65	121/18805	0.00826446280991736	2.39097266369994	0.90401	0.343156286820179	0.416351995692548	0.33243231468941	WNT5A	1	PT
GO:0015980	energy derivation by oxidation of organic compounds	2/65	352/18805	0.00568181818181818	1.64379370629371	0.718094456155287	0.344256121616758	0.417436315134093	0.333298079296149	SOD2/NDUFA13	2	PT
GO:0033108	mitochondrial respiratory chain complex assembly	1/65	122/18805	0.00819672131147541	2.37137452711223	0.894972504496923	0.345441388584078	0.418464091469847	0.334118697594638	NDUFA13	1	PT
GO:0032535	regulation of cellular component size	2/65	353/18805	0.0056657223796034	1.63913706689911	0.713931659531093	0.345517017746955	0.418464091469847	0.334118697594638	WNT5A/PFN2	2	PT
GO:0141060	disruption of anatomical structure in another organism	1/65	123/18805	0.00813008130081301	2.35209505941213	0.88602322088971	0.34771866256267	0.420878835438976	0.336046727087338	CXCL14	1	PT
GO:0015749	monosaccharide transmembrane transport	1/65	124/18805	0.00806451612903226	2.33312655086849	0.877160702469568	0.349988135153047	0.422111955738488	0.337031300332329	FABP5	1	PT
GO:0030326	embryonic limb morphogenesis	1/65	124/18805	0.00806451612903226	2.33312655086849	0.877160702469568	0.349988135153047	0.422111955738488	0.337031300332329	WNT5A	1	PT
GO:0030510	regulation of BMP signaling pathway	1/65	124/18805	0.00806451612903226	2.33312655086849	0.877160702469568	0.349988135153047	0.422111955738488	0.337031300332329	WNT5A	1	PT
GO:0035113	embryonic appendage morphogenesis	1/65	124/18805	0.00806451612903226	2.33312655086849	0.877160702469568	0.349988135153047	0.422111955738488	0.337031300332329	WNT5A	1	PT
GO:0045446	endothelial cell differentiation	1/65	124/18805	0.00806451612903226	2.33312655086849	0.877160702469568	0.349988135153047	0.422111955738488	0.337031300332329	CXCR4	1	PT
GO:0072329	monocarboxylic acid catabolic process	1/65	124/18805	0.00806451612903226	2.33312655086849	0.877160702469568	0.349988135153047	0.422111955738488	0.337031300332329	ALDH1L2	1	PT
GO:0006887	exocytosis	2/65	358/18805	0.00558659217877095	1.61624409110443	0.693311515742184	0.351810273708347	0.424057026344883	0.338584323568936	GRP/PFN2	2	PT
GO:0009142	nucleoside triphosphate biosynthetic process	1/65	125/18805	0.008	2.31446153846154	0.868383294035725	0.352249832664693	0.424334271948842	0.338805687700284	NDUFA13	1	PT
GO:0031346	positive regulation of cell projection organization	2/65	360/18805	0.00555555555555556	1.60726495726496	0.685152343332519	0.354322156011214	0.425783011371607	0.339962419995731	WNT5A/CNTN1	2	PT
GO:0002718	regulation of cytokine production involved in immune response	1/65	126/18805	0.00793650793650794	2.2960927960928	0.859689385445648	0.354503781319768	0.425783011371607	0.339962419995731	WNT5A	1	PT
GO:0010811	positive regulation of cell-substrate adhesion	1/65	126/18805	0.00793650793650794	2.2960927960928	0.859689385445648	0.354503781319768	0.425783011371607	0.339962419995731	FERMT2	1	PT
GO:1901989	positive regulation of cell cycle phase transition	1/65	126/18805	0.00793650793650794	2.2960927960928	0.859689385445648	0.354503781319768	0.425783011371607	0.339962419995731	CCND2	1	PT
GO:1903305	regulation of regulated secretory pathway	1/65	126/18805	0.00793650793650794	2.2960927960928	0.859689385445648	0.354503781319768	0.425783011371607	0.339962419995731	PFN2	1	PT
GO:0002367	cytokine production involved in immune response	1/65	127/18805	0.0078740157480315	2.27801332525742	0.85107741003532	0.356750007253394	0.426961444851137	0.340903329066327	WNT5A	1	PT
GO:0002688	regulation of leukocyte chemotaxis	1/65	127/18805	0.0078740157480315	2.27801332525742	0.85107741003532	0.356750007253394	0.426961444851137	0.340903329066327	WNT5A	1	PT
GO:0022900	electron transport chain	1/65	127/18805	0.0078740157480315	2.27801332525742	0.85107741003532	0.356750007253394	0.426961444851137	0.340903329066327	SOD2	1	PT
GO:0030833	regulation of actin filament polymerization	1/65	127/18805	0.0078740157480315	2.27801332525742	0.85107741003532	0.356750007253394	0.426961444851137	0.340903329066327	PFN2	1	PT
GO:0072655	establishment of protein localization to mitochondrion	1/65	127/18805	0.0078740157480315	2.27801332525742	0.85107741003532	0.356750007253394	0.426961444851137	0.340903329066327	NDUFA13	1	PT
GO:1903707	negative regulation of hemopoiesis	1/65	127/18805	0.0078740157480315	2.27801332525742	0.85107741003532	0.356750007253394	0.426961444851137	0.340903329066327	INHBA	1	PT
GO:0006906	vesicle fusion	1/65	128/18805	0.0078125	2.26021634615385	0.842545843106979	0.358988536513943	0.429386761040009	0.342839799847929	SPHK1	1	PT
GO:0003206	cardiac chamber morphogenesis	1/65	129/18805	0.00775193798449612	2.24269528920692	0.834093200480935	0.361219395063314	0.431036697114444	0.344157175707751	FHL2	1	PT
GO:0003231	cardiac ventricle development	1/65	129/18805	0.00775193798449612	2.24269528920692	0.834093200480935	0.361219395063314	0.431036697114444	0.344157175707751	WNT5A	1	PT
GO:0007613	memory	1/65	129/18805	0.00775193798449612	2.24269528920692	0.834093200480935	0.361219395063314	0.431036697114444	0.344157175707751	CCND2	1	PT
GO:0039531	regulation of cytoplasmic pattern recognition receptor signaling pathway	1/65	129/18805	0.00775193798449612	2.24269528920692	0.834093200480935	0.361219395063314	0.431036697114444	0.344157175707751	TNFAIP3	1	PT
GO:0043010	camera-type eye development	2/65	366/18805	0.00546448087431694	1.58091635140815	0.660971095185842	0.361838233167596	0.431520861109765	0.344543751872436	INHBA/WNT5A	2	PT
GO:0021987	cerebral cortex development	1/65	130/18805	0.00769230769230769	2.22544378698225	0.825718037108278	0.363442608777218	0.432924283984628	0.345664301598642	TMEM14B	1	PT
GO:0090174	organelle membrane fusion	1/65	130/18805	0.00769230769230769	2.22544378698225	0.825718037108278	0.363442608777218	0.432924283984628	0.345664301598642	SPHK1	1	PT
GO:0007517	muscle organ development	2/65	369/18805	0.00542005420054201	1.56806337294142	0.649043235287029	0.365584808487866	0.434286136056929	0.346751659510562	COL6A3/ETV1	2	PT
GO:0071375	cellular response to peptide hormone stimulus	2/65	369/18805	0.00542005420054201	1.56806337294142	0.649043235287029	0.365584808487866	0.434286136056929	0.346751659510562	INHBA/GJB2	2	PT
GO:0010977	negative regulation of neuron projection development	1/65	131/18805	0.00763358778625954	2.20845566647093	0.817418945741451	0.365658203445464	0.434286136056929	0.346751659510562	WNT5A	1	PT
GO:0043200	response to amino acid	1/65	131/18805	0.00763358778625954	2.20845566647093	0.817418945741451	0.365658203445464	0.434286136056929	0.346751659510562	COL1A2	1	PT
GO:0051209	release of sequestered calcium ion into cytosol	1/65	131/18805	0.00763358778625954	2.20845566647093	0.817418945741451	0.365658203445464	0.434286136056929	0.346751659510562	CALM2	1	PT
GO:0051283	negative regulation of sequestering of calcium ion	1/65	132/18805	0.00757575757575758	2.19172494172494	0.809194555659871	0.367866204772231	0.436652441186265	0.348641013469579	CALM2	1	PT
GO:0002696	positive regulation of leukocyte activation	2/65	372/18805	0.00537634408602151	1.55541770057899	0.637221148258667	0.369323419462751	0.437356680942732	0.349203307045113	HLA-DMA/WNT5A	2	PT
GO:0002768	immune response-regulating cell surface receptor signaling pathway	2/65	372/18805	0.00537634408602151	1.55541770057899	0.637221148258667	0.369323419462751	0.437356680942732	0.349203307045113	TNFAIP3/FOXP1	2	PT
GO:0009306	protein secretion	2/65	372/18805	0.00537634408602151	1.55541770057899	0.637221148258667	0.369323419462751	0.437356680942732	0.349203307045113	C1QTNF3/CAVIN1	2	PT
GO:0050767	regulation of neurogenesis	2/65	372/18805	0.00537634408602151	1.55541770057899	0.637221148258667	0.369323419462751	0.437356680942732	0.349203307045113	CXCR4/WNT5A	2	PT
GO:1903322	positive regulation of protein modification by small protein conjugation or removal	1/65	133/18805	0.0075187969924812	2.17524580682475	0.801043531447898	0.370066638376355	0.437980679551209	0.349701532834649	SPHK1	1	PT
GO:0002698	negative regulation of immune effector process	1/65	134/18805	0.00746268656716418	2.15901262916188	0.792964571822643	0.372259529791604	0.439292277289043	0.350748765648327	CD59	1	PT
GO:0030512	negative regulation of transforming growth factor beta receptor signaling pathway	1/65	134/18805	0.00746268656716418	2.15901262916188	0.792964571822643	0.372259529791604	0.439292277289043	0.350748765648327	CILP	1	PT
GO:0035710	CD4-positive, alpha-beta T cell activation	1/65	134/18805	0.00746268656716418	2.15901262916188	0.792964571822643	0.372259529791604	0.439292277289043	0.350748765648327	FOXP1	1	PT
GO:0051282	regulation of sequestering of calcium ion	1/65	134/18805	0.00746268656716418	2.15901262916188	0.792964571822643	0.372259529791604	0.439292277289043	0.350748765648327	CALM2	1	PT
GO:1901875	positive regulation of post-translational protein modification	1/65	134/18805	0.00746268656716418	2.15901262916188	0.792964571822643	0.372259529791604	0.439292277289043	0.350748765648327	SPHK1	1	PT
GO:0035592	establishment of protein localization to extracellular region	2/65	375/18805	0.00533333333333333	1.54297435897436	0.625502851440334	0.373053831515062	0.439973214221317	0.351292453304194	C1QTNF3/CAVIN1	2	PT
GO:0002244	hematopoietic progenitor cell differentiation	1/65	135/18805	0.00740740740740741	2.14301994301994	0.784956408509203	0.374444904466959	0.440331551420204	0.351578564252857	INHBA	1	PT
GO:0002832	negative regulation of response to biotic stimulus	1/65	135/18805	0.00740740740740741	2.14301994301994	0.784956408509203	0.374444904466959	0.440331551420204	0.351578564252857	TNFAIP3	1	PT
GO:0043401	steroid hormone receptor signaling pathway	1/65	135/18805	0.00740740740740741	2.14301994301994	0.784956408509203	0.374444904466959	0.440331551420204	0.351578564252857	FOXP1	1	PT
GO:0048706	embryonic skeletal system development	1/65	135/18805	0.00740740740740741	2.14301994301994	0.784956408509203	0.374444904466959	0.440331551420204	0.351578564252857	WNT5A	1	PT
GO:0070585	protein localization to mitochondrion	1/65	135/18805	0.00740740740740741	2.14301994301994	0.784956408509203	0.374444904466959	0.440331551420204	0.351578564252857	NDUFA13	1	PT
GO:0007368	determination of left/right symmetry	1/65	136/18805	0.00735294117647059	2.12726244343891	0.777017805161084	0.376622787766886	0.441866248683629	0.352803928773518	WNT5A	1	PT
GO:0034219	carbohydrate transmembrane transport	1/65	136/18805	0.00735294117647059	2.12726244343891	0.777017805161084	0.376622787766886	0.441866248683629	0.352803928773518	FABP5	1	PT
GO:0051384	response to glucocorticoid	1/65	136/18805	0.00735294117647059	2.12726244343891	0.777017805161084	0.376622787766886	0.441866248683629	0.352803928773518	GJB2	1	PT
GO:0061844	antimicrobial humoral immune response mediated by antimicrobial peptide	1/65	136/18805	0.00735294117647059	2.12726244343891	0.777017805161084	0.376622787766886	0.441866248683629	0.352803928773518	CXCL14	1	PT
GO:0030879	mammary gland development	1/65	137/18805	0.0072992700729927	2.11173498034812	0.769147556323671	0.378793204971619	0.443898287076115	0.354426390616719	WNT5A	1	PT
GO:0048593	camera-type eye morphogenesis	1/65	137/18805	0.0072992700729927	2.11173498034812	0.769147556323671	0.378793204971619	0.443898287076115	0.354426390616719	WNT5A	1	PT
GO:0030218	erythrocyte differentiation	1/65	138/18805	0.0072463768115942	2.09643255295429	0.761344486438715	0.380956181277428	0.445144989663469	0.355421808511027	INHBA	1	PT
GO:0046632	alpha-beta T cell differentiation	1/65	138/18805	0.0072463768115942	2.09643255295429	0.761344486438715	0.380956181277428	0.445144989663469	0.355421808511027	FOXP1	1	PT
GO:0048565	digestive tract development	1/65	138/18805	0.0072463768115942	2.09643255295429	0.761344486438715	0.380956181277428	0.445144989663469	0.355421808511027	WNT5A	1	PT
GO:0051208	sequestering of calcium ion	1/65	138/18805	0.0072463768115942	2.09643255295429	0.761344486438715	0.380956181277428	0.445144989663469	0.355421808511027	CALM2	1	PT
GO:1903052	positive regulation of proteolysis involved in protein catabolic process	1/65	138/18805	0.0072463768115942	2.09643255295429	0.761344486438715	0.380956181277428	0.445144989663469	0.355421808511027	TGFB1I1	1	PT
GO:0006644	phospholipid metabolic process	2/65	383/18805	0.00522193211488251	1.51074512954409	0.594746970065061	0.382959788767772	0.445606707144584	0.355790462468658	FABP5/PLPP3	2	PT
GO:0071692	protein localization to extracellular region	2/65	383/18805	0.00522193211488251	1.51074512954409	0.594746970065061	0.382959788767772	0.445606707144584	0.355790462468658	C1QTNF3/CAVIN1	2	PT
GO:0008360	regulation of cell shape	1/65	139/18805	0.00719424460431655	2.08135030437189	0.753607448887952	0.383111741796899	0.445606707144584	0.355790462468658	FERMT2	1	PT
GO:0030048	actin filament-based movement	1/65	139/18805	0.00719424460431655	2.08135030437189	0.753607448887952	0.383111741796899	0.445606707144584	0.355790462468658	ACTA2	1	PT
GO:0035270	endocrine system development	1/65	139/18805	0.00719424460431655	2.08135030437189	0.753607448887952	0.383111741796899	0.445606707144584	0.355790462468658	WNT5A	1	PT
GO:0046328	regulation of JNK cascade	1/65	139/18805	0.00719424460431655	2.08135030437189	0.753607448887952	0.383111741796899	0.445606707144584	0.355790462468658	WNT5A	1	PT
GO:0050768	negative regulation of neurogenesis	1/65	139/18805	0.00719424460431655	2.08135030437189	0.753607448887952	0.383111741796899	0.445606707144584	0.355790462468658	WNT5A	1	PT
GO:0070646	protein modification by small protein removal	1/65	139/18805	0.00719424460431655	2.08135030437189	0.753607448887952	0.383111741796899	0.445606707144584	0.355790462468658	TNFAIP3	1	PT
GO:0002286	T cell activation involved in immune response	1/65	140/18805	0.00714285714285714	2.06648351648352	0.745935325074015	0.385259911559205	0.447334472997357	0.357169980779176	FOXP1	1	PT
GO:0043433	negative regulation of DNA-binding transcription factor activity	1/65	140/18805	0.00714285714285714	2.06648351648352	0.745935325074015	0.385259911559205	0.447334472997357	0.357169980779176	TNFAIP3	1	PT
GO:0090288	negative regulation of cellular response to growth factor stimulus	1/65	140/18805	0.00714285714285714	2.06648351648352	0.745935325074015	0.385259911559205	0.447334472997357	0.357169980779176	WNT5A	1	PT
GO:0031647	regulation of protein stability	2/65	386/18805	0.00518134715025907	1.49900358708649	0.583393118801775	0.386658219724186	0.448700799393396	0.358260911172583	PLPP3/PFN2	2	PT
GO:0002702	positive regulation of production of molecular mediator of immune response	1/65	141/18805	0.00709219858156028	2.05182760501909	0.738327023536953	0.387400715510378	0.448790874661622	0.358332830918909	WNT5A	1	PT
GO:0008643	carbohydrate transport	1/65	141/18805	0.00709219858156028	2.05182760501909	0.738327023536953	0.387400715510378	0.448790874661622	0.358332830918909	FABP5	1	PT
GO:0030183	B cell differentiation	1/65	141/18805	0.00709219858156028	2.05182760501909	0.738327023536953	0.387400715510378	0.448790874661622	0.358332830918909	INHBA	1	PT
GO:0030336	negative regulation of cell migration	2/65	388/18805	0.00515463917525773	1.49127676447264	0.575876888134703	0.389118729865927	0.45023214126142	0.359483596609508	CDH11/PFN2	2	PT
GO:0010565	regulation of ketone metabolic process	1/65	142/18805	0.00704225352112676	2.0373781148429	0.730781479104718	0.389534178513584	0.45023214126142	0.359483596609508	FABP5	1	PT
GO:0018105	peptidyl-serine phosphorylation	1/65	142/18805	0.00704225352112676	2.0373781148429	0.730781479104718	0.389534178513584	0.45023214126142	0.359483596609508	PFN2	1	PT
GO:1904064	positive regulation of cation transmembrane transport	1/65	142/18805	0.00704225352112676	2.0373781148429	0.730781479104718	0.389534178513584	0.45023214126142	0.359483596609508	CALM2	1	PT
GO:0000086	G2/M transition of mitotic cell cycle	1/65	143/18805	0.00699300699300699	2.02313071543841	0.723297652076091	0.391660325349388	0.451915760018525	0.360827866088865	CALM2	1	PT
GO:0050770	regulation of axonogenesis	1/65	143/18805	0.00699300699300699	2.02313071543841	0.723297652076091	0.391660325349388	0.451915760018525	0.360827866088865	WNT5A	1	PT
GO:0060972	left/right pattern formation	1/65	143/18805	0.00699300699300699	2.02313071543841	0.723297652076091	0.391660325349388	0.451915760018525	0.360827866088865	WNT5A	1	PT
GO:0031333	negative regulation of protein-containing complex assembly	1/65	145/18805	0.00689655172413793	1.99522546419098	0.708511114091948	0.395890769229693	0.456536906429459	0.364517576751474	PFN2	1	PT
GO:0045089	positive regulation of innate immune response	2/65	395/18805	0.00506329113924051	1.46484907497566	0.549896089072956	0.397697369665447	0.457141298204851	0.365000147650501	TNFAIP3/WNT5A	2	PT
GO:0001101	response to acid chemical	1/65	146/18805	0.00684931506849315	1.98155953635406	0.701206444159944	0.397995115424767	0.457141298204851	0.365000147650501	COL1A2	1	PT
GO:0006986	response to unfolded protein	1/65	146/18805	0.00684931506849315	1.98155953635406	0.701206444159944	0.397995115424767	0.457141298204851	0.365000147650501	HSPE1	1	PT
GO:0008064	regulation of actin polymerization or depolymerization	1/65	146/18805	0.00684931506849315	1.98155953635406	0.701206444159944	0.397995115424767	0.457141298204851	0.365000147650501	PFN2	1	PT
GO:0009799	specification of symmetry	1/65	146/18805	0.00684931506849315	1.98155953635406	0.701206444159944	0.397995115424767	0.457141298204851	0.365000147650501	WNT5A	1	PT
GO:0009855	determination of bilateral symmetry	1/65	146/18805	0.00684931506849315	1.98155953635406	0.701206444159944	0.397995115424767	0.457141298204851	0.365000147650501	WNT5A	1	PT
GO:1900180	regulation of protein localization to nucleus	1/65	146/18805	0.00684931506849315	1.98155953635406	0.701206444159944	0.397995115424767	0.457141298204851	0.365000147650501	FERMT2	1	PT
GO:0051961	negative regulation of nervous system development	1/65	147/18805	0.00680272108843537	1.96807953950811	0.693959572249187	0.40009224375412	0.459289565534066	0.366715411389383	WNT5A	1	PT
GO:0007269	neurotransmitter secretion	1/65	148/18805	0.00675675675675676	1.9547817047817	0.68676957479382	0.402182178589363	0.460644180793813	0.367796991136736	PFN2	1	PT
GO:0071675	regulation of mononuclear cell migration	1/65	148/18805	0.00675675675675676	1.9547817047817	0.68676957479382	0.402182178589363	0.460644180793813	0.367796991136736	WNT5A	1	PT
GO:0099175	regulation of postsynapse organization	1/65	148/18805	0.00675675675675676	1.9547817047817	0.68676957479382	0.402182178589363	0.460644180793813	0.367796991136736	WNT5A	1	PT
GO:0099643	signal release from synapse	1/65	148/18805	0.00675675675675676	1.9547817047817	0.68676957479382	0.402182178589363	0.460644180793813	0.367796991136736	PFN2	1	PT
GO:0030832	regulation of actin filament length	1/65	149/18805	0.00671140939597315	1.94166236448116	0.679635549400937	0.40426494422112	0.46250650398179	0.369283945479418	PFN2	1	PT
GO:0034101	erythrocyte homeostasis	1/65	149/18805	0.00671140939597315	1.94166236448116	0.679635549400937	0.40426494422112	0.46250650398179	0.369283945479418	INHBA	1	PT
GO:0008203	cholesterol metabolic process	1/65	150/18805	0.00666666666666667	1.92871794871795	0.672556614223675	0.406340564859287	0.464094553773297	0.37055190882172	CH25H	1	PT
GO:0050714	positive regulation of protein secretion	1/65	150/18805	0.00666666666666667	1.92871794871795	0.672556614223675	0.406340564859287	0.464094553773297	0.37055190882172	C1QTNF3	1	PT
GO:0060078	regulation of postsynaptic membrane potential	1/65	150/18805	0.00666666666666667	1.92871794871795	0.672556614223675	0.406340564859287	0.464094553773297	0.37055190882172	RGS4	1	PT
GO:2000146	negative regulation of cell motility	2/65	403/18805	0.00496277915632754	1.43577018514984	0.520804261533829	0.40743593759095	0.465083299673998	0.371341363638343	CDH11/PFN2	2	PT
GO:0006119	oxidative phosphorylation	1/65	151/18805	0.00662251655629139	1.91594498217015	0.665531907356956	0.408409064633296	0.465669119303167	0.371809105782802	NDUFA13	1	PT
GO:0055123	digestive system development	1/65	151/18805	0.00662251655629139	1.91594498217015	0.665531907356956	0.408409064633296	0.465669119303167	0.371809105782802	WNT5A	1	PT
GO:0002687	positive regulation of leukocyte migration	1/65	152/18805	0.00657894736842105	1.90334008097166	0.658560586254925	0.410470467592385	0.466443713173164	0.372427572935143	WNT5A	1	PT
GO:0030534	adult behavior	1/65	152/18805	0.00657894736842105	1.90334008097166	0.658560586254925	0.410470467592385	0.466443713173164	0.372427572935143	CCND2	1	PT
GO:0034767	positive regulation of monoatomic ion transmembrane transport	1/65	152/18805	0.00657894736842105	1.90334008097166	0.658560586254925	0.410470467592385	0.466443713173164	0.372427572935143	CALM2	1	PT
GO:0035107	appendage morphogenesis	1/65	152/18805	0.00657894736842105	1.90334008097166	0.658560586254925	0.410470467592385	0.466443713173164	0.372427572935143	WNT5A	1	PT
GO:0035108	limb morphogenesis	1/65	152/18805	0.00657894736842105	1.90334008097166	0.658560586254925	0.410470467592385	0.466443713173164	0.372427572935143	WNT5A	1	PT
GO:0046165	alcohol biosynthetic process	1/65	152/18805	0.00657894736842105	1.90334008097166	0.658560586254925	0.410470467592385	0.466443713173164	0.372427572935143	SPHK1	1	PT
GO:0046467	membrane lipid biosynthetic process	1/65	153/18805	0.0065359477124183	1.89089994972348	0.651641827169163	0.412524797705851	0.46851526379941	0.374081582947833	SPHK1	1	PT
GO:0018209	peptidyl-serine modification	1/65	154/18805	0.00649350649350649	1.87862137862138	0.644774824606797	0.414572078863321	0.470312862576036	0.375516858696188	PFN2	1	PT
GO:1903531	negative regulation of secretion by cell	1/65	154/18805	0.00649350649350649	1.87862137862138	0.644774824606797	0.414572078863321	0.470312862576036	0.375516858696188	INHBA	1	PT
GO:0050678	regulation of epithelial cell proliferation	2/65	410/18805	0.0048780487804878	1.41125703564728	0.495852354034314	0.41589714810818	0.471551917647853	0.376506170504017	TNFAIP3/WNT5A	2	PT
GO:1905039	carboxylic acid transmembrane transport	1/65	155/18805	0.00645161290322581	1.86650124069479	0.637958790807687	0.416612334875003	0.472098476844925	0.376942565527644	RGS4	1	PT
GO:0030041	actin filament polymerization	1/65	156/18805	0.00641025641025641	1.85453648915187	0.631192955239892	0.418645589471953	0.473078860870929	0.377725343884469	PFN2	1	PT
GO:0050730	regulation of peptidyl-tyrosine phosphorylation	1/65	156/18805	0.00641025641025641	1.85453648915187	0.631192955239892	0.418645589471953	0.473078860870929	0.377725343884469	PLPP3	1	PT
GO:0062013	positive regulation of small molecule metabolic process	1/65	156/18805	0.00641025641025641	1.85453648915187	0.631192955239892	0.418645589471953	0.473078860870929	0.377725343884469	NNMT	1	PT
GO:0071456	cellular response to hypoxia	1/65	156/18805	0.00641025641025641	1.85453648915187	0.631192955239892	0.418645589471953	0.473078860870929	0.377725343884469	INHBA	1	PT
GO:2000377	regulation of reactive oxygen species metabolic process	1/65	156/18805	0.00641025641025641	1.85453648915187	0.631192955239892	0.418645589471953	0.473078860870929	0.377725343884469	SOD2	1	PT
GO:0009152	purine ribonucleotide biosynthetic process	1/65	157/18805	0.00636942675159236	1.84272415482607	0.624476564112665	0.420671866306331	0.474612690074943	0.3789500153113	NDUFA13	1	PT
GO:0009411	response to UV	1/65	157/18805	0.00636942675159236	1.84272415482607	0.624476564112665	0.420671866306331	0.474612690074943	0.3789500153113	COL6A3	1	PT
GO:0002697	regulation of immune effector process	2/65	414/18805	0.00483091787439614	1.39762170196953	0.481797547074372	0.420706063547913	0.474612690074943	0.3789500153113	WNT5A/CD59	2	PT
GO:0045807	positive regulation of endocytosis	1/65	159/18805	0.00628930817610063	1.81954523463957	0.611189180917857	0.424703580903081	0.478322998514316	0.381912476006752	WNT5A	1	PT
GO:0048754	branching morphogenesis of an epithelial tube	1/65	159/18805	0.00628930817610063	1.81954523463957	0.611189180917857	0.424703580903081	0.478322998514316	0.381912476006752	WNT5A	1	PT
GO:1903825	organic acid transmembrane transport	1/65	159/18805	0.00628930817610063	1.81954523463957	0.611189180917857	0.424703580903081	0.478322998514316	0.381912476006752	RGS4	1	PT
GO:0044839	cell cycle G2/M phase transition	1/65	160/18805	0.00625	1.80817307692308	0.60461676082299	0.426709065577612	0.480314540186028	0.383502603626115	CALM2	1	PT
GO:0016125	sterol metabolic process	1/65	161/18805	0.0062111801242236	1.79694218824654	0.598090928251793	0.428707666314402	0.481493635211683	0.38444404090196	CH25H	1	PT
GO:0030902	hindbrain development	1/65	161/18805	0.0062111801242236	1.79694218824654	0.598090928251793	0.428707666314402	0.481493635211683	0.38444404090196	CNTN1	1	PT
GO:0072006	nephron development	1/65	161/18805	0.0062111801242236	1.79694218824654	0.598090928251793	0.428707666314402	0.481493635211683	0.38444404090196	ACTA2	1	PT
GO:1902652	secondary alcohol metabolic process	1/65	161/18805	0.0062111801242236	1.79694218824654	0.598090928251793	0.428707666314402	0.481493635211683	0.38444404090196	CH25H	1	PT
GO:0016032	viral process	2/65	421/18805	0.00475059382422803	1.37438333637859	0.457545784902394	0.429074643070567	0.481638665309256	0.384559838812225	CXCR4/CH25H	2	PT
GO:0009166	nucleotide catabolic process	1/65	162/18805	0.00617283950617284	1.78584995251662	0.591611006379533	0.430699406374988	0.48265982175393	0.385375171521266	TYMP	1	PT
GO:0030010	establishment of cell polarity	1/65	162/18805	0.00617283950617284	1.78584995251662	0.591611006379533	0.430699406374988	0.48265982175393	0.385375171521266	WNT5A	1	PT
GO:0051494	negative regulation of cytoskeleton organization	1/65	162/18805	0.00617283950617284	1.78584995251662	0.591611006379533	0.430699406374988	0.48265982175393	0.385375171521266	PFN2	1	PT
GO:0036294	cellular response to decreased oxygen levels	1/65	163/18805	0.00613496932515337	1.7748938178386	0.585176332530835	0.432684308943546	0.484615998678474	0.386937062492598	INHBA	1	PT
GO:0002833	positive regulation of response to biotic stimulus	2/65	425/18805	0.00470588235294118	1.3614479638009	0.443878899183683	0.433829178157399	0.485629677041864	0.387746424398338	TNFAIP3/WNT5A	2	PT
GO:0035966	response to topologically incorrect protein	1/65	164/18805	0.00609756097560976	1.7640712945591	0.578786257797056	0.434662397127146	0.486293565846669	0.388276500138003	HSPE1	1	PT
GO:0006865	amino acid transport	1/65	165/18805	0.00606060606060606	1.75337995337995	0.572440146666306	0.436633693956003	0.487959840099838	0.389606921062171	RGS4	1	PT
GO:0045861	negative regulation of proteolysis	1/65	165/18805	0.00606060606060606	1.75337995337995	0.572440146666306	0.436633693956003	0.487959840099838	0.389606921062171	TIMP3	1	PT
GO:0030162	regulation of proteolysis	2/65	430/18805	0.00465116279069767	1.34561717352415	0.426985251590905	0.439743544614004	0.491164190757506	0.392165404550243	TIMP3/TGFB1I1	2	PT
GO:0016311	dephosphorylation	1/65	167/18805	0.00598802395209581	1.73238139106403	0.559877338014808	0.440556005287592	0.491529427386983	0.392457024284032	PLPP3	1	PT
GO:1902904	negative regulation of supramolecular fiber organization	1/65	167/18805	0.00598802395209581	1.73238139106403	0.559877338014808	0.440556005287592	0.491529427386983	0.392457024284032	PFN2	1	PT
GO:0043254	regulation of protein-containing complex assembly	2/65	431/18805	0.00464037122969838	1.34249509191505	0.423631394776566	0.44092252421601	0.491667462300342	0.392567236955595	PFN2/FERMT2	2	PT
GO:0030098	lymphocyte differentiation	2/65	432/18805	0.00462962962962963	1.33938746438746	0.420285724927508	0.442100193794256	0.492709351917099	0.393399123869871	INHBA/FOXP1	2	PT
GO:0007605	sensory perception of sound	1/65	169/18805	0.00591715976331361	1.71187983614019	0.54748307710714	0.444451425652494	0.494785122015558	0.395056502880258	GJB2	1	PT
GO:0051963	regulation of synapse assembly	1/65	169/18805	0.00591715976331361	1.71187983614019	0.54748307710714	0.444451425652494	0.494785122015558	0.395056502880258	WNT5A	1	PT
GO:0007204	positive regulation of cytosolic calcium ion concentration	1/65	170/18805	0.00588235294117647	1.70180995475113	0.541347695793043	0.446389108488541	0.496669200378734	0.3965608274369	CXCR4	1	PT
GO:1903706	regulation of hemopoiesis	2/65	436/18805	0.00458715596330275	1.32709950599859	0.406984043299815	0.446797670665229	0.496850786983574	0.396705813544779	INHBA/FOXP1	2	PT
GO:0043524	negative regulation of neuron apoptotic process	1/65	171/18805	0.00584795321637427	1.69185784975259	0.535252727096868	0.448320136551232	0.497996860403865	0.397620885032013	SOD2	1	PT
GO:0048639	positive regulation of developmental growth	1/65	171/18805	0.00584795321637427	1.69185784975259	0.535252727096868	0.448320136551232	0.497996860403865	0.397620885032013	CXCR4	1	PT
GO:0007292	female gamete generation	1/65	172/18805	0.00581395348837209	1.68202146690519	0.529197619888399	0.4502445323398	0.499586398897586	0.398890037014525	INHBA	1	PT
GO:2000058	regulation of ubiquitin-dependent protein catabolic process	1/65	172/18805	0.00581395348837209	1.68202146690519	0.529197619888399	0.4502445323398	0.499586398897586	0.398890037014525	TGFB1I1	1	PT
GO:0007009	plasma membrane organization	1/65	173/18805	0.00578034682080925	1.67229879946643	0.523181833874715	0.452162318278613	0.500890970740805	0.399931660069072	CXCR4	1	PT
GO:0009260	ribonucleotide biosynthetic process	1/65	173/18805	0.00578034682080925	1.67229879946643	0.523181833874715	0.452162318278613	0.500890970740805	0.399931660069072	NDUFA13	1	PT
GO:0046777	protein autophosphorylation	1/65	173/18805	0.00578034682080925	1.67229879946643	0.523181833874715	0.452162318278613	0.500890970740805	0.399931660069072	CALM2	1	PT
GO:0048284	organelle fusion	1/65	174/18805	0.00574712643678161	1.66268788682582	0.517204839324263	0.454073516717422	0.502733117196709	0.401402504490783	SPHK1	1	PT
GO:0009266	response to temperature stimulus	1/65	175/18805	0.00571428571428571	1.65318681318681	0.511266116799511	0.455978149931601	0.504015149351252	0.402426130944001	CXCR4	1	PT
GO:0051048	negative regulation of secretion	1/65	175/18805	0.00571428571428571	1.65318681318681	0.511266116799511	0.455978149931601	0.504015149351252	0.402426130944001	INHBA	1	PT
GO:1903169	regulation of calcium ion transmembrane transport	1/65	175/18805	0.00571428571428571	1.65318681318681	0.511266116799511	0.455978149931601	0.504015149351252	0.402426130944001	CALM2	1	PT
GO:0030509	BMP signaling pathway	1/65	176/18805	0.00568181818181818	1.64379370629371	0.50536515689788	0.457876240122393	0.505285769072395	0.403440645247667	WNT5A	1	PT
GO:0043604	amide biosynthetic process	1/65	176/18805	0.00568181818181818	1.64379370629371	0.50536515689788	0.457876240122393	0.505285769072395	0.403440645247667	SPHK1	1	PT
GO:0050905	neuromuscular process	1/65	176/18805	0.00568181818181818	1.64379370629371	0.50536515689788	0.457876240122393	0.505285769072395	0.403440645247667	BACE1	1	PT
GO:0050680	negative regulation of epithelial cell proliferation	1/65	177/18805	0.00564971751412429	1.63450673620165	0.499501460000648	0.459767809417151	0.506820802433168	0.404666278122077	WNT5A	1	PT
GO:0050806	positive regulation of synaptic transmission	1/65	177/18805	0.00564971751412429	1.63450673620165	0.499501460000648	0.459767809417151	0.506820802433168	0.404666278122077	CALB2	1	PT
GO:0000280	nuclear division	2/65	448/18805	0.00446428571428571	1.2915521978022	0.367833668876209	0.460760733763741	0.507362961322227	0.405099159761372	WNT5A/SPHK1	2	PT
GO:0010975	regulation of neuron projection development	2/65	448/18805	0.00446428571428571	1.2915521978022	0.367833668876209	0.460760733763741	0.507362961322227	0.405099159761372	WNT5A/CNTN1	2	PT
GO:0007338	single fertilization	1/65	178/18805	0.00561797752808989	1.62532411408816	0.493674536029539	0.461652879869582	0.508069066160817	0.405662942494095	MFGE8	1	PT
GO:0008361	regulation of cell size	1/65	179/18805	0.00558659217877095	1.61624409110443	0.487883904210712	0.463531473459987	0.509582645904709	0.406871445930933	WNT5A	1	PT
GO:0071453	cellular response to oxygen levels	1/65	179/18805	0.00558659217877095	1.61624409110443	0.487883904210712	0.463531473459987	0.509582645904709	0.406871445930933	INHBA	1	PT
GO:0001936	regulation of endothelial cell proliferation	1/65	180/18805	0.00555555555555556	1.60726495726496	0.482129092845897	0.465403612095502	0.511085853846741	0.408071668100634	WNT5A	1	PT
GO:0046390	ribose phosphate biosynthetic process	1/65	180/18805	0.00555555555555556	1.60726495726496	0.482129092845897	0.465403612095502	0.511085853846741	0.408071668100634	NDUFA13	1	PT
GO:0030099	myeloid cell differentiation	2/65	455/18805	0.0043956043956044	1.27168216398986	0.345498207190356	0.468813916456377	0.514551859525292	0.410839067566393	INHBA/FOXP1	2	PT
GO:0002262	myeloid cell homeostasis	1/65	183/18805	0.00546448087431694	1.58091635140815	0.465074996010977	0.470981516251607	0.516371180514079	0.412291687209682	INHBA	1	PT
GO:0006839	mitochondrial transport	1/65	183/18805	0.00546448087431694	1.58091635140815	0.465074996010977	0.470981516251607	0.516371180514079	0.412291687209682	NDUFA13	1	PT
GO:0017157	regulation of exocytosis	1/65	184/18805	0.00543478260869565	1.57232441471572	0.459458923359336	0.47282805268398	0.517834941419718	0.413460413266114	PFN2	1	PT
GO:1901292	nucleoside phosphate catabolic process	1/65	184/18805	0.00543478260869565	1.57232441471572	0.459458923359336	0.47282805268398	0.517834941419718	0.413460413266114	TYMP	1	PT
GO:0019730	antimicrobial humoral response	1/65	185/18805	0.00540540540540541	1.56382536382536	0.453876441262095	0.474668242608019	0.51928859604605	0.41462107005938	CXCL14	1	PT
GO:0071478	cellular response to radiation	1/65	185/18805	0.00540540540540541	1.56382536382536	0.453876441262095	0.474668242608019	0.51928859604605	0.41462107005938	CCND2	1	PT
GO:0002753	cytoplasmic pattern recognition receptor signaling pathway	1/65	186/18805	0.00537634408602151	1.55541770057899	0.448327128037204	0.476502107496874	0.521013373477954	0.415998202293508	TNFAIP3	1	PT
GO:0042391	regulation of membrane potential	2/65	463/18805	0.00431965442764579	1.24970925402891	0.320404638336352	0.477932332911585	0.522295183025343	0.417021651008149	SOD2/RGS4	2	PT
GO:0008154	actin polymerization or depolymerization	1/65	187/18805	0.0053475935828877	1.54709995886466	0.442810569655888	0.478329668752189	0.522447453734187	0.417143230116029	PFN2	1	PT
GO:0071772	response to BMP	1/65	188/18805	0.00531914893617021	1.53887070376432	0.437326359562556	0.480150947704338	0.523871588955433	0.418280317419387	WNT5A	1	PT
GO:0071773	cellular response to BMP stimulus	1/65	188/18805	0.00531914893617021	1.53887070376432	0.437326359562556	0.480150947704338	0.523871588955433	0.418280317419387	WNT5A	1	PT
GO:2001242	regulation of intrinsic apoptotic signaling pathway	1/65	189/18805	0.00529100529100529	1.53072853072853	0.431874098499884	0.481965965612659	0.525568702404757	0.419635361608165	SOD2	1	PT
GO:0072594	establishment of protein localization to organelle	2/65	467/18805	0.00428265524625268	1.23900510624279	0.308025479249788	0.482456865596945	0.525820857284077	0.419836692287637	TNFAIP3/NDUFA13	2	PT
GO:0007565	female pregnancy	1/65	190/18805	0.00526315789473684	1.52267206477733	0.426453394338913	0.483774743665687	0.526124519829762	0.420079148776356	GJB2	1	PT
GO:0035725	sodium ion transmembrane transport	1/65	190/18805	0.00526315789473684	1.52267206477733	0.426453394338913	0.483774743665687	0.526124519829762	0.420079148776356	GRP	1	PT
GO:0051302	regulation of cell division	1/65	190/18805	0.00526315789473684	1.52267206477733	0.426453394338913	0.483774743665687	0.526124519829762	0.420079148776356	CALM2	1	PT
GO:0051897	positive regulation of phosphatidylinositol 3-kinase/protein kinase B signal transduction	1/65	190/18805	0.00526315789473684	1.52267206477733	0.426453394338913	0.483774743665687	0.526124519829762	0.420079148776356	FERMT2	1	PT
GO:0001764	neuron migration	1/65	191/18805	0.00523560209424084	1.51469995972614	0.421063861913987	0.485577302981386	0.526952860952469	0.420740529914486	CXCR4	1	PT
GO:0061138	morphogenesis of a branching epithelium	1/65	191/18805	0.00523560209424084	1.51469995972614	0.421063861913987	0.485577302981386	0.526952860952469	0.420740529914486	WNT5A	1	PT
GO:0062207	regulation of pattern recognition receptor signaling pathway	1/65	191/18805	0.00523560209424084	1.51469995972614	0.421063861913987	0.485577302981386	0.526952860952469	0.420740529914486	TNFAIP3	1	PT
GO:0097553	calcium ion transmembrane import into cytosol	1/65	191/18805	0.00523560209424084	1.51469995972614	0.421063861913987	0.485577302981386	0.526952860952469	0.420740529914486	CALM2	1	PT
GO:1901991	negative regulation of mitotic cell cycle phase transition	1/65	192/18805	0.00520833333333333	1.5068108974359	0.415705122862375	0.487373664607378	0.528618998837675	0.422070841956943	INHBA	1	PT
GO:0007254	JNK cascade	1/65	193/18805	0.00518134715025907	1.49900358708649	0.410376805468399	0.489163849521176	0.530276657002345	0.423394383446707	WNT5A	1	PT
GO:0000910	cytokinesis	1/65	194/18805	0.00515463917525773	1.49127676447264	0.40507854451195	0.490947878630413	0.531641419372506	0.424484065058437	CALM2	1	PT
GO:0021543	pallium development	1/65	194/18805	0.00515463917525773	1.49127676447264	0.40507854451195	0.490947878630413	0.531641419372506	0.424484065058437	TMEM14B	1	PT
GO:0002700	regulation of production of molecular mediator of immune response	1/65	197/18805	0.0050761421319797	1.46856696602889	0.389360542436054	0.496263239163698	0.5368232154415	0.428621421140036	WNT5A	1	PT
GO:0140013	meiotic nuclear division	1/65	197/18805	0.0050761421319797	1.46856696602889	0.389360542436054	0.496263239163698	0.5368232154415	0.428621421140036	WNT5A	1	PT
GO:0018108	peptidyl-tyrosine phosphorylation	1/65	198/18805	0.00505050505050505	1.46114996114996	0.384178979870542	0.498022852741425	0.538151695198179	0.429682133242054	PLPP3	1	PT
GO:0071466	cellular response to xenobiotic stimulus	1/65	198/18805	0.00505050505050505	1.46114996114996	0.384178979870542	0.498022852741425	0.538151695198179	0.429682133242054	CXCR4	1	PT
GO:0045088	regulation of innate immune response	2/65	482/18805	0.004149377593361	1.20044685604852	0.262555719562586	0.499213477350972	0.53889629306465	0.430276650368968	TNFAIP3/WNT5A	2	PT
GO:0018212	peptidyl-tyrosine modification	1/65	199/18805	0.0050251256281407	1.45380749903363	0.379025740061484	0.499776414012549	0.53889629306465	0.430276650368968	PLPP3	1	PT
GO:0030324	lung development	1/65	199/18805	0.0050251256281407	1.45380749903363	0.379025740061484	0.499776414012549	0.53889629306465	0.430276650368968	WNT5A	1	PT
GO:0032271	regulation of protein polymerization	1/65	199/18805	0.0050251256281407	1.45380749903363	0.379025740061484	0.499776414012549	0.53889629306465	0.430276650368968	PFN2	1	PT
GO:0009060	aerobic respiration	1/65	201/18805	0.00497512437810945	1.43934175277459	0.368802917455484	0.503265461539245	0.542081148732431	0.432819568266674	NDUFA13	1	PT
GO:0046631	alpha-beta T cell activation	1/65	201/18805	0.00497512437810945	1.43934175277459	0.368802917455484	0.503265461539245	0.542081148732431	0.432819568266674	FOXP1	1	PT
GO:0007264	small GTPase-mediated signal transduction	2/65	487/18805	0.00410677618069815	1.18812193966198	0.247720476962257	0.504723919209297	0.5433630709191	0.433843106917083	COL1A2/FERMT2	2	PT
GO:0002520	immune system development	1/65	202/18805	0.00495049504950495	1.43221629855293	0.363732692773688	0.505000988576438	0.543372477081449	0.433850617178483	TNFAIP3	1	PT
GO:0050673	epithelial cell proliferation	2/65	488/18805	0.00409836065573771	1.18568726355612	0.244772070062973	0.50582143991742	0.543966232518734	0.434324695593905	TNFAIP3/WNT5A	2	PT
GO:0001935	endothelial cell proliferation	1/65	203/18805	0.00492610837438424	1.4251610458507	0.358689506839286	0.506730544870721	0.544077069651755	0.43441319245489	WNT5A	1	PT
GO:0030323	respiratory tube development	1/65	203/18805	0.00492610837438424	1.4251610458507	0.358689506839286	0.506730544870721	0.544077069651755	0.43441319245489	WNT5A	1	PT
GO:0046474	glycerophospholipid biosynthetic process	1/65	203/18805	0.00492610837438424	1.4251610458507	0.358689506839286	0.506730544870721	0.544077069651755	0.43441319245489	FABP5	1	PT
GO:0002822	regulation of adaptive immune response based on somatic recombination of immune receptors built from immunoglobulin superfamily domains	1/65	204/18805	0.00490196078431373	1.41817496229261	0.353673051920673	0.508454150643401	0.545349393566148	0.435429067455544	TNFAIP3	1	PT
GO:0090276	regulation of peptide hormone secretion	1/65	204/18805	0.00490196078431373	1.41817496229261	0.353673051920673	0.508454150643401	0.545349393566148	0.435429067455544	GRP	1	PT
GO:0120032	regulation of plasma membrane bounded cell projection assembly	1/65	206/18805	0.00485436893203883	1.40440627333831	0.343719129495087	0.511883591172413	0.548737041886785	0.438133903229683	PFN2	1	PT
GO:0002791	regulation of peptide secretion	1/65	207/18805	0.00483091787439614	1.39762170196953	0.338781071491753	0.513589466035244	0.550274427894905	0.439361414553125	GRP	1	PT
GO:0001763	morphogenesis of a branching structure	1/65	208/18805	0.00480769230769231	1.39090236686391	0.333868563302169	0.515289470589912	0.551220907524866	0.440117122265468	WNT5A	1	PT
GO:0009749	response to glucose	1/65	208/18805	0.00480769230769231	1.39090236686391	0.333868563302169	0.515289470589912	0.551220907524866	0.440117122265468	COL6A3	1	PT
GO:0060491	regulation of cell projection assembly	1/65	208/18805	0.00480769230769231	1.39090236686391	0.333868563302169	0.515289470589912	0.551220907524866	0.440117122265468	PFN2	1	PT
GO:0048285	organelle fission	2/65	498/18805	0.00401606425702811	1.16187828236021	0.215621307141219	0.516712125139052	0.552158143493631	0.44086544946392	WNT5A/SPHK1	2	PT
GO:0090087	regulation of peptide transport	1/65	209/18805	0.00478468899521531	1.38424733161575	0.328981321533458	0.516983624722926	0.552158143493631	0.44086544946392	GRP	1	PT
GO:0098739	import across plasma membrane	1/65	209/18805	0.00478468899521531	1.38424733161575	0.328981321533458	0.516983624722926	0.552158143493631	0.44086544946392	RGS4	1	PT
GO:0051216	cartilage development	1/65	210/18805	0.00476190476190476	1.37765567765568	0.324119067355875	0.518671948254492	0.553377605487538	0.441839117363929	WNT5A	1	PT
GO:0051260	protein homooligomerization	1/65	210/18805	0.00476190476190476	1.37765567765568	0.324119067355875	0.518671948254492	0.553377605487538	0.441839117363929	SOD2	1	PT
GO:0006352	DNA-templated transcription initiation	1/65	211/18805	0.004739336492891	1.37112650382793	0.319281526407344	0.520354460938733	0.55429657201522	0.442572857499872	CAVIN1	1	PT
GO:0034764	positive regulation of transmembrane transport	1/65	211/18805	0.004739336492891	1.37112650382793	0.319281526407344	0.520354460938733	0.55429657201522	0.442572857499872	CALM2	1	PT
GO:0044703	multi-organism reproductive process	1/65	211/18805	0.004739336492891	1.37112650382793	0.319281526407344	0.520354460938733	0.55429657201522	0.442572857499872	GJB2	1	PT
GO:0051651	maintenance of location in cell	1/65	212/18805	0.00471698113207547	1.36465892597968	0.314468428700447	0.522031182463901	0.555790296787277	0.443765507922161	CALM2	1	PT
GO:0009746	response to hexose	1/65	213/18805	0.00469483568075117	1.35825207656194	0.30967950853178	0.523702132452598	0.556983623012874	0.444718307965055	COL6A3	1	PT
GO:0050851	antigen receptor-mediated signaling pathway	1/65	213/18805	0.00469483568075117	1.35825207656194	0.30967950853178	0.523702132452598	0.556983623012874	0.444718307965055	FOXP1	1	PT
GO:0002819	regulation of adaptive immune response	1/65	219/18805	0.0045662100456621	1.3210396909027	0.28143935441741	0.5336077207665	0.566032286302862	0.451943127621154	TNFAIP3	1	PT
GO:0009566	fertilization	1/65	219/18805	0.0045662100456621	1.3210396909027	0.28143935441741	0.5336077207665	0.566032286302862	0.451943127621154	MFGE8	1	PT
GO:0009952	anterior/posterior pattern specification	1/65	219/18805	0.0045662100456621	1.3210396909027	0.28143935441741	0.5336077207665	0.566032286302862	0.451943127621154	WNT5A	1	PT
GO:0044706	multi-multicellular organism process	1/65	219/18805	0.0045662100456621	1.3210396909027	0.28143935441741	0.5336077207665	0.566032286302862	0.451943127621154	GJB2	1	PT
GO:0060348	bone development	1/65	219/18805	0.0045662100456621	1.3210396909027	0.28143935441741	0.5336077207665	0.566032286302862	0.451943127621154	FOXP1	1	PT
GO:1903046	meiotic cell cycle process	1/65	220/18805	0.00454545454545455	1.31503496503496	0.27681257917594	0.535238813963002	0.567465234698994	0.453087251720678	WNT5A	1	PT
GO:0099504	synaptic vesicle cycle	1/65	222/18805	0.0045045045045045	1.3031878031878	0.267625385786807	0.538484168717027	0.570607243145986	0.455595958660031	PFN2	1	PT
GO:0009755	hormone-mediated signaling pathway	1/65	223/18805	0.00448430493273543	1.29734391169369	0.263064509396491	0.540098468293704	0.571122401198304	0.456007281736501	FOXP1	1	PT
GO:0032259	methylation	1/65	223/18805	0.00448430493273543	1.29734391169369	0.263064509396491	0.540098468293704	0.571122401198304	0.456007281736501	NNMT	1	PT
GO:0045862	positive regulation of proteolysis	1/65	223/18805	0.00448430493273543	1.29734391169369	0.263064509396491	0.540098468293704	0.571122401198304	0.456007281736501	TGFB1I1	1	PT
GO:0048167	regulation of synaptic plasticity	1/65	223/18805	0.00448430493273543	1.29734391169369	0.263064509396491	0.540098468293704	0.571122401198304	0.456007281736501	CALB2	1	PT
GO:0051235	maintenance of location	1/65	224/18805	0.00446428571428571	1.2915521978022	0.258525146801042	0.541707207910587	0.572524580385667	0.457126838452182	CALM2	1	PT
GO:0045619	regulation of lymphocyte differentiation	1/65	225/18805	0.00444444444444444	1.28581196581197	0.254007077408363	0.543310406419053	0.573919443400408	0.458241	INHBA	1	PT
GO:0060541	respiratory system development	1/65	226/18805	0.00442477876106195	1.28012253233492	0.24951008391855	0.544908082607576	0.575007226305546	0.4591090836155	WNT5A	1	PT
GO:1903828	negative regulation of protein localization	1/65	226/18805	0.00442477876106195	1.28012253233492	0.24951008391855	0.544908082607576	0.575007226305546	0.4591090836155	GPM6B	1	PT
GO:0016485	protein processing	1/65	227/18805	0.00440528634361234	1.27448322602508	0.245033952259975	0.546500255201931	0.576386987908286	0.460210741222678	BACE1	1	PT
GO:0007163	establishment or maintenance of cell polarity	1/65	228/18805	0.0043859649122807	1.26889338731444	0.24057847152688	0.548086942865397	0.577759531130884	0.461306635382476	WNT5A	1	PT
GO:0046034	ATP metabolic process	1/65	230/18805	0.00434782608695652	1.25785953177258	0.231728634679408	0.551243937741553	0.580785106101272	0.463722377113218	NDUFA13	1	PT
GO:0002285	lymphocyte activation involved in immune response	1/65	231/18805	0.00432900432900433	1.25241425241425	0.227333872041763	0.552814281970183	0.581834158518514	0.464559983097823	FOXP1	1	PT
GO:0002440	production of molecular mediator of immune response	1/65	231/18805	0.00432900432900433	1.25241425241425	0.227333872041763	0.552814281970183	0.581834158518514	0.464559983097823	WNT5A	1	PT
GO:0050769	positive regulation of neurogenesis	1/65	234/18805	0.00427350427350427	1.23635765943458	0.214267829686716	0.557492922618709	0.586453593923577	0.468248327623971	CXCR4	1	PT
GO:0002685	regulation of leukocyte migration	1/65	236/18805	0.00423728813559322	1.22588005215124	0.20565374807627	0.560585205794031	0.589400333194659	0.47060112373593	WNT5A	1	PT
GO:1903050	regulation of proteolysis involved in protein catabolic process	1/65	239/18805	0.00418410041841004	1.21049243643386	0.192873818542483	0.565183777480519	0.59392690679712	0.474215323633724	TGFB1I1	1	PT
GO:0007596	blood coagulation	1/65	241/18805	0.004149377593361	1.20044685604852	0.184445896059694	0.568223133096539	0.596811122676603	0.47651819853477	CD59	1	PT
GO:0016054	organic acid catabolic process	1/65	242/18805	0.00413223140495868	1.19548633184997	0.180259019503547	0.569734956860207	0.597469335909849	0.477043742667981	ALDH1L2	1	PT
GO:0046395	carboxylic acid catabolic process	1/65	242/18805	0.00413223140495868	1.19548633184997	0.180259019503547	0.569734956860207	0.597469335909849	0.477043742667981	ALDH1L2	1	PT
GO:0046434	organophosphate catabolic process	1/65	242/18805	0.00413223140495868	1.19548633184997	0.180259019503547	0.569734956860207	0.597469335909849	0.477043742667981	TYMP	1	PT
GO:0099173	postsynapse organization	1/65	243/18805	0.00411522633744856	1.19056663501108	0.176089971954573	0.571241568280994	0.598739221412533	0.478057670741859	WNT5A	1	PT
GO:0072593	reactive oxygen species metabolic process	1/65	245/18805	0.00408163265306122	1.18084772370487	0.167804695590369	0.574239224798248	0.601569803526359	0.480317722269779	SOD2	1	PT
GO:0045017	glycerolipid biosynthetic process	1/65	246/18805	0.0040650406504065	1.17604752970607	0.163688138343316	0.575730305099331	0.602197245777968	0.480818697603617	FABP5	1	PT
GO:0045930	negative regulation of mitotic cell cycle	1/65	246/18805	0.0040650406504065	1.17604752970607	0.163688138343316	0.575730305099331	0.602197245777968	0.480818697603617	INHBA	1	PT
GO:0050817	coagulation	1/65	246/18805	0.0040650406504065	1.17604752970607	0.163688138343316	0.575730305099331	0.602197245777968	0.480818697603617	CD59	1	PT
GO:0007599	hemostasis	1/65	248/18805	0.00403225806451613	1.16656327543424	0.15550638135009	0.578697057357377	0.604987889080376	0.48304686036515	CD59	1	PT
GO:0030072	peptide hormone secretion	1/65	250/18805	0.004	1.15723076923077	0.14739205379385	0.581643381236127	0.607754307019173	0.485255680614139	GRP	1	PT
GO:0008654	phospholipid biosynthetic process	1/65	251/18805	0.00398406374501992	1.15262028807846	0.143359791234984	0.583108925845109	0.608971415593783	0.486227469448759	FABP5	1	PT
GO:0009205	purine ribonucleoside triphosphate metabolic process	1/65	254/18805	0.00393700787401575	1.13900666262871	0.131360810233894	0.587475296860474	0.613215193887866	0.489615874106179	NDUFA13	1	PT
GO:0002790	peptide secretion	1/65	257/18805	0.00389105058365759	1.12571086501048	0.119505485097821	0.591796632340312	0.617089691292035	0.492709429928299	GRP	1	PT
GO:0051222	positive regulation of protein transport	1/65	257/18805	0.00389105058365759	1.12571086501048	0.119505485097821	0.591796632340312	0.617089691292035	0.492709429928299	C1QTNF3	1	PT
GO:1901136	carbohydrate derivative catabolic process	1/65	258/18805	0.00387596899224806	1.12134764460346	0.115584972565652	0.593227148778628	0.618262983158374	0.493646233726452	TYMP	1	PT
GO:0009144	purine nucleoside triphosphate metabolic process	1/65	261/18805	0.00383141762452107	1.10845859121721	0.103915303337784	0.597489147473839	0.621744873399036	0.496426316070653	NDUFA13	1	PT
GO:0009199	ribonucleoside triphosphate metabolic process	1/65	261/18805	0.00383141762452107	1.10845859121721	0.103915303337784	0.597489147473839	0.621744873399036	0.496426316070653	NDUFA13	1	PT
GO:0050870	positive regulation of T cell activation	1/65	261/18805	0.00383141762452107	1.10845859121721	0.103915303337784	0.597489147473839	0.621744873399036	0.496426316070653	HLA-DMA	1	PT
GO:0000209	protein polyubiquitination	1/65	264/18805	0.00378787878787879	1.09586247086247	0.0923806495523966	0.601707170612056	0.625812542624249	0.499674108107003	TNFAIP3	1	PT
GO:0016072	rRNA metabolic process	1/65	265/18805	0.00377358490566038	1.09172714078374	0.0885651647287098	0.603103483319581	0.626942789385088	0.500576542947625	CAVIN1	1	PT
GO:0042593	glucose homeostasis	1/65	268/18805	0.00373134328358209	1.07950631458094	0.0772051553318883	0.607263566513712	0.630943418260783	0.503770807250715	FABP5	1	PT
GO:0033500	carbohydrate homeostasis	1/65	269/18805	0.00371747211895911	1.07549327995425	0.0734468933006394	0.608640697019005	0.632049954596659	0.504654310726689	FABP5	1	PT
GO:0002699	positive regulation of immune effector process	1/65	270/18805	0.0037037037037037	1.07150997150997	0.0697026353174581	0.610013072649872	0.633150421381851	0.505532968027303	WNT5A	1	PT
GO:0007188	adenylate cyclase-modulating G protein-coupled receptor signaling pathway	1/65	272/18805	0.00367647058823529	1.06363122171946	0.0622556622347107	0.612743623881065	0.6356587286676	0.507535702265593	AKAP12	1	PT
GO:0007416	synapse assembly	1/65	273/18805	0.00366300366300366	1.05973513665821	0.0585527161045059	0.614101831642772	0.635764933065754	0.507620500163222	WNT5A	1	PT
GO:0050708	regulation of protein secretion	1/65	273/18805	0.00366300366300366	1.05973513665821	0.0585527161045059	0.614101831642772	0.635764933065754	0.507620500163222	C1QTNF3	1	PT
GO:0070663	regulation of leukocyte proliferation	1/65	273/18805	0.00366300366300366	1.05973513665821	0.0585527161045059	0.614101831642772	0.635764933065754	0.507620500163222	TNFAIP3	1	PT
GO:1901988	negative regulation of cell cycle phase transition	1/65	273/18805	0.00366300366300366	1.05973513665821	0.0585527161045059	0.614101831642772	0.635764933065754	0.507620500163222	INHBA	1	PT
GO:0009141	nucleoside triphosphate metabolic process	1/65	277/18805	0.0036101083032491	1.04443210219383	0.0438752375755192	0.619487916375045	0.640685919642219	0.511549615371254	NDUFA13	1	PT
GO:0071695	anatomical structure maturation	1/65	277/18805	0.0036101083032491	1.04443210219383	0.0438752375755192	0.619487916375045	0.640685919642219	0.511549615371254	WNT5A	1	PT
GO:0051896	regulation of phosphatidylinositol 3-kinase/protein kinase B signal transduction	1/65	278/18805	0.00359712230215827	1.04067515218594	0.0402388944417561	0.620822830312633	0.641738760277223	0.512390246022516	FERMT2	1	PT
GO:0090150	establishment of protein localization to membrane	1/65	279/18805	0.003584229390681	1.03694513371933	0.036615546529251	0.62215313289965	0.642785762307037	0.513226214894663	NDUFA13	1	PT
GO:0007611	learning or memory	1/65	282/18805	0.00354609929078014	1.02591380250955	0.0258224260138842	0.626116529109835	0.645891987492316	0.515706351027003	CCND2	1	PT
GO:0051258	protein polymerization	1/65	282/18805	0.00354609929078014	1.02591380250955	0.0258224260138842	0.626116529109835	0.645891987492316	0.515706351027003	PFN2	1	PT
GO:0140014	mitotic nuclear division	1/65	282/18805	0.00354609929078014	1.02591380250955	0.0258224260138842	0.626116529109835	0.645891987492316	0.515706351027003	SPHK1	1	PT
GO:0015833	peptide transport	1/65	283/18805	0.00353356890459364	1.02228866539821	0.022250017079318	0.627428542585398	0.646915885303173	0.516523872553956	GRP	1	PT
GO:0051962	positive regulation of nervous system development	1/65	285/18805	0.00350877192982456	1.01511470985155	0.0151425410554919	0.630038984558472	0.648946563444001	0.518145248317081	CXCR4	1	PT
GO:1903039	positive regulation of leukocyte cell-cell adhesion	1/65	285/18805	0.00350877192982456	1.01511470985155	0.0151425410554919	0.630038984558472	0.648946563444001	0.518145248317081	HLA-DMA	1	PT
GO:0002221	pattern recognition receptor signaling pathway	1/65	288/18805	0.00347222222222222	1.0045405982906	0.00457320867046563	0.633920915611385	0.652613042253714	0.521072713659105	TNFAIP3	1	PT
GO:0015850	organic hydroxy compound transport	1/65	293/18805	0.00341296928327645	0.987398267261749	-0.0128037	0.640301864167482	0.658178312151853	0.52551625079415	GPM6B	1	PT
GO:0051054	positive regulation of DNA metabolic process	1/65	293/18805	0.00341296928327645	0.987398267261749	-0.0128037	0.640301864167482	0.658178312151853	0.52551625079415	SMOC2	1	PT
GO:0051321	meiotic cell cycle	1/65	293/18805	0.00341296928327645	0.987398267261749	-0.0128037	0.640301864167482	0.658178312151853	0.52551625079415	WNT5A	1	PT
GO:0006650	glycerophospholipid metabolic process	1/65	302/18805	0.0033112582781457	0.957972491085074	-0.0433624	0.651512772217558	0.669362437209819	0.534446109709828	FABP5	1	PT
GO:0048511	rhythmic process	1/65	303/18805	0.0033003300330033	0.954810865701955	-0.0467028	0.652736988280134	0.669940395979357	0.534907575425233	INHBA	1	PT
GO:0051056	regulation of small GTPase mediated signal transduction	1/65	303/18805	0.0033003300330033	0.954810865701955	-0.0467028	0.652736988280134	0.669940395979357	0.534907575425233	FERMT2	1	PT
GO:0002758	innate immune response-activating signaling pathway	1/65	305/18805	0.00327868852459016	0.948549810844893	-0.0533517	0.655172730821161	0.672099685872772	0.536631640026291	TNFAIP3	1	PT
GO:0043086	negative regulation of catalytic activity	1/65	306/18805	0.00326797385620915	0.94544997486174	-0.0566603	0.656384286091249	0.672661021930556	0.537079833494651	TIMP3	1	PT
GO:0048193	Golgi vesicle transport	1/65	306/18805	0.00326797385620915	0.94544997486174	-0.0566603	0.656384286091249	0.672661021930556	0.537079833494651	PLPP3	1	PT
GO:0007162	negative regulation of cell adhesion	1/65	312/18805	0.00320512820512821	0.927268244575937	-0.0762948	0.663566093071034	0.679676954207812	0.542681638291461	POSTN	1	PT
GO:0010948	negative regulation of cell cycle process	1/65	315/18805	0.00317460317460317	0.918437118437118	-0.0859758	0.667101366689889	0.682607512656405	0.545021514978681	INHBA	1	PT
GO:0050807	regulation of synapse organization	1/65	315/18805	0.00317460317460317	0.918437118437118	-0.0859758	0.667101366689889	0.682607512656405	0.545021514978681	WNT5A	1	PT
GO:0050803	regulation of synapse structure or activity	1/65	321/18805	0.00311526479750779	0.901270069494369	-0.105075	0.67406253666067	0.689034142724814	0.550152796998214	WNT5A	1	PT
GO:0051607	defense response to virus	1/65	321/18805	0.00311526479750779	0.901270069494369	-0.105075	0.67406253666067	0.689034142724814	0.550152796998214	TNFAIP3	1	PT
GO:0034504	protein localization to nucleus	1/65	322/18805	0.0031055900621118	0.898471094123268	-0.108225	0.675208713630863	0.689857540414984	0.550810231099371	FERMT2	1	PT
GO:0044248	cellular catabolic process	1/65	323/18805	0.00309597523219814	0.895689449869016	-0.111366	0.67635092180129	0.690676054789517	0.551463766163325	ALDH1L2	1	PT
GO:0030217	T cell differentiation	1/65	324/18805	0.00308641975308642	0.89292497625831	-0.114497	0.677489174700484	0.691489707040565	0.552113419110751	FOXP1	1	PT
GO:0002218	activation of innate immune response	1/65	325/18805	0.00307692307692308	0.890177514792899	-0.117619	0.678623485811597	0.692298518271276	0.552759206791257	TNFAIP3	1	PT
GO:0009416	response to light stimulus	1/65	326/18805	0.00306748466257669	0.887446908919302	-0.120732	0.679753868572541	0.69310250949617	0.553401145983687	COL6A3	1	PT
GO:0042886	amide transport	1/65	328/18805	0.00304878048780488	0.88203564727955	-0.126931	0.682002902570296	0.695045736137318	0.554952696923675	GRP	1	PT
GO:0006790	sulfur compound metabolic process	1/65	329/18805	0.00303951367781155	0.879354687865326	-0.130017	0.683121580458099	0.695485771959603	0.555304039365796	SOD2	1	PT
GO:0050890	cognition	1/65	329/18805	0.00303951367781155	0.879354687865326	-0.130017	0.683121580458099	0.695485771959603	0.555304039365796	CCND2	1	PT
GO:1904951	positive regulation of establishment of protein localization	1/65	331/18805	0.00302114803625378	0.874041366488496	-0.136163	0.685347	0.697401171716381	0.556833372193041	C1QTNF3	1	PT
GO:0051336	regulation of hydrolase activity	1/65	334/18805	0.0029940119760479	0.866190695532013	-0.145315	0.688657107793748	0.700417199036836	0.559241490692959	TIMP3	1	PT
GO:0051251	positive regulation of lymphocyte activation	1/65	337/18805	0.0029673590504451	0.858479799132618	-0.15439	0.69193260624029	0.70339534519909	0.561619363340248	HLA-DMA	1	PT
GO:0006605	protein targeting	1/65	339/18805	0.00294985250737463	0.853415021556614	-0.160398	0.694097397439449	0.70524196177365	0.56309377688594	NDUFA13	1	PT
GO:0042742	defense response to bacterium	1/65	343/18805	0.00291545189504373	0.84346265978919	-0.172315	0.698382143117053	0.709239638822484	0.566285684330778	FOXP1	1	PT
GO:0070661	leukocyte proliferation	1/65	344/18805	0.00290697674418605	0.841010733452594	-0.175274	0.699444062773504	0.709250990043237	0.566294747605673	TNFAIP3	1	PT
GO:0071214	cellular response to abiotic stimulus	1/65	344/18805	0.00290697674418605	0.841010733452594	-0.175274	0.699444062773504	0.709250990043237	0.566294747605673	CCND2	1	PT
GO:0104004	cellular response to environmental stimulus	1/65	344/18805	0.00290697674418605	0.841010733452594	-0.175274	0.699444062773504	0.709250990043237	0.566294747605673	CCND2	1	PT
GO:0009150	purine ribonucleotide metabolic process	1/65	350/18805	0.00285714285714286	0.826593406593407	-0.192859	0.705738708969584	0.714917901782595	0.570819439707896	NDUFA13	1	PT
[truncated: 4,026 more rows]
