# Supplementary material
Source: Research Square preprint supplement (doi:10.21203/rs.3.rs-9551458/v1)
Supplement: Supplementary file 6 [file 9d6176f58663a75e3625f0e1.xlsx]

## Sheet: diff_gene_GO_enrich_BP_PT_BM_ne
Biological processes (BP) that differ between PT and BM
ID	Description	GeneRatio	BgRatio	RichFactor	FoldEnrichment	zScore	pvalue	p.adjust	qvalue	geneID	Count
GO:0008544	epidermis development	19/263	395/18805	0.0481012658227848	3.43933195360254	5.83535477870741	3.230290298189e-06	0.0106438065325328	0.0093100366699384	KLF4/MED1/ASAH1/SNAI1/SLITRK6/KRT15/SFN/OVOL1/MAFB/KLK14/FGFR1/ANXA1/PALLD/FZD6/FGFR2/TNF/S100A7/CSTA/CALML5	19
GO:0071900	regulation of protein serine/threonine kinase activity	13/263	217/18805	0.0599078341013825	4.28352403146957	5.79399933877699	1.22051059043955e-05	0.0155488213183044	0.0136004066031523	GSTP1/CDK12/GADD45A/NEK10/LTF/ERBB2/FGFR1/SASH1/PIM1/RGS2/CDC6/TNF/CDKN2B	13
GO:0043588	skin development	16/263	324/18805	0.0493827160493827	3.53095808102145	5.47292417142549	1.41567417162104e-05	0.0155488213183044	0.0136004066031523	KLF4/MED1/ASAH1/SNAI1/JUP/SFN/OVOL1/MAFB/ANXA1/RIPK4/PALLD/FZD6/FGFR2/TNF/S100A7/CSTA	16
GO:1902106	negative regulation of leukocyte differentiation	9/263	120/18805	0.075	5.36264258555133	5.70976735765414	4.83257611677321e-05	0.026858719393528	0.0234930672308856	LGALS1/LTF/ERBB2/MAFB/SOCS1/ANXA1/TMEM176A/TMEM176B/ASCL2	9
GO:0010721	negative regulation of cell development	14/263	285/18805	0.0491228070175439	3.51237409112134	5.08991994863281	5.17118485860525e-05	0.026858719393528	0.0234930672308856	PCM1/LGALS1/TMEM98/LTF/ERBB2/MAFB/SOCS1/ANXA1/TMEM176A/TMEM176B/SPART/ASCL2/TNF/CDKN2B	14
GO:0006879	intracellular iron ion homeostasis	7/263	72/18805	0.0972222222222222	6.95157372201098	6.02586095663788	6.55846885494895e-05	0.026858719393528	0.0234930672308856	CYBRD1/CISD1/ATP13A2/SLC39A8/STEAP2/HPX/CP	7
GO:0022612	gland morphogenesis	9/263	127/18805	0.0708661417322835	5.06706386036346	5.47699536948944	7.52491047766176e-05	0.026858719393528	0.0234930672308856	MED1/PGR/FRS2/HPN/FGFR1/SULF2/FGFR2/TNF/NR3C1	9
GO:1903707	negative regulation of hemopoiesis	9/263	127/18805	0.0708661417322835	5.06706386036346	5.47699536948944	7.52491047766176e-05	0.026858719393528	0.0234930672308856	LGALS1/LTF/ERBB2/MAFB/SOCS1/ANXA1/TMEM176A/TMEM176B/ASCL2	9
GO:2000345	regulation of hepatocyte proliferation	4/263	17/18805	0.235294117647059	16.8239767389846	7.77364185228108	7.71057937882491e-05	0.026858719393528	0.0234930672308856	MED1/HPN/SULF2/TNF	4
GO:0001704	formation of primary germ layer	9/263	132/18805	0.0681818181818182	4.87512962322848	5.32097058851139	0.000101399744443823	0.026858719393528	0.0234930672308856	KLF4/SNAI1/DUSP5/MESP1/DUSP4/FGFR1/ETS2/FN1/FGFR2	9
GO:0000041	transition metal ion transport	8/263	104/18805	0.0769230769230769	5.50014624159111	5.48069442791127	0.000106491968360729	0.026858719393528	0.0234930672308856	CYBRD1/LTF/SLC39A8/STEAP2/ATP13A1/SLC30A8/HPX/CP	8
GO:0044344	cellular response to fibroblast growth factor stimulus	10/263	165/18805	0.0606060606060606	4.33344855398087	5.12197532765892	0.000112800182609217	0.026858719393528	0.0234930672308856	GALNT3/FRS2/SMOC2/ERBB2/CREB3L1/FGFR1/SULF2/ERBB4/FGFR2/CXCL8	10
GO:0006882	intracellular zinc ion homeostasis	5/263	35/18805	0.142857142857143	10.2145573058121	6.49831961943937	0.000118633682363587	0.026858719393528	0.0234930672308856	MT1E/ATP13A2/SLC39A8/SLC30A8/MT1G	5
GO:0008543	fibroblast growth factor receptor signaling pathway	9/263	135/18805	0.0666666666666667	4.76679340937896	5.23107846366377	0.000120466825574815	0.026858719393528	0.0234930672308856	GALNT3/FRS2/SMOC2/ERBB2/CREB3L1/FGFR1/SULF2/ERBB4/FGFR2	9
GO:0007369	gastrulation	11/263	202/18805	0.0544554455445545	3.89366788389866	4.92444830797567	0.000134285079948738	0.026858719393528	0.0234930672308856	KLF4/FRS2/SNAI1/DUSP5/MESP1/DUSP4/FGFR1/ETS2/FN1/FGFR2/PHLDB2	11
GO:0043405	regulation of MAP kinase activity	8/263	109/18805	0.073394495412844	5.24784595527959	5.29702918083457	0.000147932858099345	0.026858719393528	0.0234930672308856	GSTP1/CDK12/NEK10/ERBB2/FGFR1/SASH1/RGS2/TNF	8
GO:0043651	linoleic acid metabolic process	4/263	20/18805	0.2	14.3003802281369	7.08758306738516	0.000151863167569511	0.026858719393528	0.0234930672308856	GSTP1/FADS1/CYP2J2/FADS2	4
GO:0006826	iron ion transport	6/263	58/18805	0.103448275862069	7.3967483938639	5.81074855625271	0.000155572983188521	0.026858719393528	0.0234930672308856	CYBRD1/LTF/SLC39A8/STEAP2/HPX/CP	6
GO:0010092	specification of animal organ identity	5/263	37/18805	0.135135135135135	9.66241907306546	6.28139004800523	0.000155704517423793	0.026858719393528	0.0234930672308856	FRS2/MESP1/FGFR1/ROBO2/FGFR2	5
GO:0071774	response to fibroblast growth factor	10/263	173/18805	0.0578034682080925	4.13305786940372	4.93044862187944	0.000166470611232191	0.026858719393528	0.0234930672308856	GALNT3/FRS2/SMOC2/ERBB2/CREB3L1/FGFR1/SULF2/ERBB4/FGFR2/CXCL8	10
GO:0060135	maternal process involved in female pregnancy	6/263	59/18805	0.101694915254237	7.27137977701875	5.74591911059765	0.000171178484753896	0.026858719393528	0.0234930672308856	MED1/PGR/CTSB/RGS2/STC1/STC2	6
GO:0008286	insulin receptor signaling pathway	10/263	176/18805	0.0568181818181818	4.06260801935707	4.8615827801862	0.000191492999628077	0.0286804288079324	0.025086499185726	GRB14/ERBB2/SESN3/SOCS1/SOCS3/FGFR1/ERBB4/FGFR2/SOCS7/BCAR3	10
GO:0001759	organ induction	4/263	22/18805	0.181818181818182	13.0003456619426	6.70729370574132	0.000224293151335027	0.030449344022084	0.0266337525540982	FRS2/MESP1/FGFR1/ROBO2	4
GO:0009913	epidermal cell differentiation	12/263	251/18805	0.047808764940239	3.41841758441519	4.59382115823927	0.000227450437712873	0.030449344022084	0.0266337525540982	KLF4/MED1/ASAH1/SLITRK6/SFN/OVOL1/MAFB/FGFR1/ANXA1/PALLD/S100A7/CSTA	12
GO:0045859	regulation of protein kinase activity	15/263	369/18805	0.040650406504065	2.90658134718229	4.40514167381968	0.000231026889393657	0.030449344022084	0.0266337525540982	GSTP1/TRAF4/CDK12/GADD45A/NEK10/LTF/ERBB2/SFN/FGFR1/SASH1/PIM1/RGS2/CDC6/TNF/CDKN2B	15
GO:0043542	endothelial cell migration	13/263	293/18805	0.0443686006825939	3.17243929975733	4.46354067930236	0.000260880309749061	0.0307666122376215	0.0269112640545029	KLF4/GADD45A/SMOC2/JUP/FGFR1/SASH1/ANXA1/ID1/STC1/TNF/S100A7/PRCP/S100A9	13
GO:0006590	thyroid hormone generation	4/263	23/18805	0.173913043478261	12.4351132418582	6.5351893726756	0.000268543688685981	0.0307666122376215	0.0269112640545029	MED1/CTSB/HPN/CTSK	4
GO:0001890	placenta development	9/263	152/18805	0.0592105263157895	4.23366519911947	4.76724211127007	0.000294278285622537	0.0307666122376215	0.0269112640545029	KRT19/MED1/SNAI1/CTSB/SOCS3/ASCL2/FGFR2/STC1/STC2	9
GO:0033212	iron import into cell	3/263	10/18805	0.3	21.4505703422053	7.70387037184381	0.000301784712780189	0.0307666122376215	0.0269112640545029	CYBRD1/SLC39A8/STEAP2	3
GO:0045927	positive regulation of growth	12/263	259/18805	0.0463320463320463	3.31282939647959	4.46368007725231	0.000302966726675643	0.0307666122376215	0.0269112640545029	ERBB2/HPN/SFN/FGFR1/PIM1/CXCR4/ERBB4/FN1/FGFR2/EFNA5/RIMS2/S100A9	12
GO:0010839	negative regulation of keratinocyte proliferation	4/263	24/18805	0.166666666666667	11.9169835234474	6.37343596137361	0.000318730069734563	0.0307666122376215	0.0269112640545029	MED1/SFN/OVOL1/FGFR2	4
GO:0072574	hepatocyte proliferation	4/263	24/18805	0.166666666666667	11.9169835234474	6.37343596137361	0.000318730069734563	0.0307666122376215	0.0269112640545029	MED1/HPN/SULF2/TNF	4
GO:0072575	epithelial cell proliferation involved in liver morphogenesis	4/263	24/18805	0.166666666666667	11.9169835234474	6.37343596137361	0.000318730069734563	0.0307666122376215	0.0269112640545029	MED1/HPN/SULF2/TNF	4
GO:0035924	cellular response to vascular endothelial growth factor stimulus	8/263	122/18805	0.0655737704918033	4.68864925512685	4.8679787833815	0.000320907863455935	0.0307666122376215	0.0269112640545029	SMOC2/ERBB2/FGFR1/ANXA1/ERBB4/FGFR2/MT1G/RAMP2	8
GO:0043062	extracellular structure organization	14/263	340/18805	0.0411764705882353	2.9441959293223	4.30853414581449	0.000326807717243324	0.0307666122376215	0.0269112640545029	FKBP10/SMOC2/HPN/PLOD2/SLC39A8/CREB3L1/SULF2/FMOD/TEX14/CTSK/RAMP2/TNF/COL18A1/PHLDB2	14
GO:0048645	animal organ formation	6/263	69/18805	0.0869565217391304	6.21755662092908	5.17104103759226	0.000405392014949512	0.0346963773118184	0.0303485923104413	FRS2/MESP1/FGFR1/PIM1/ROBO2/FGFR2	6
GO:0061180	mammary gland epithelium development	6/263	69/18805	0.0869565217391304	6.21755662092908	5.17104103759226	0.000405392014949512	0.0346963773118184	0.0303485923104413	MED1/PGR/ERBB4/FGFR2/LBH/NR3C1	6
GO:0038130	ERBB4 signaling pathway	3/263	11/18805	0.272727272727273	19.5005184929139	7.30962906038401	0.000410670323265832	0.0346963773118184	0.0303485923104413	ERBB2/CADM1/ERBB4	3
GO:2000347	positive regulation of hepatocyte proliferation	3/263	11/18805	0.272727272727273	19.5005184929139	7.30962906038401	0.000410670323265832	0.0346963773118184	0.0303485923104413	MED1/HPN/TNF	3
GO:0072576	liver morphogenesis	4/263	26/18805	0.153846153846154	11.0002924831822	6.0769806339408	0.000438686777807011	0.0361368233218525	0.0316085367798841	MED1/HPN/SULF2/TNF	4
GO:0009636	response to toxic substance	12/263	272/18805	0.0441176470588235	3.15449563855961	4.26267199299586	0.000470792237373482	0.0378356200523323	0.0330944581753169	GSTP1/MT1E/SLC39A8/PIM1/EPHX2/DHRS2/MT1G/GPX8/TNF/PXDNL/CP/S100A9	12
GO:0043549	regulation of kinase activity	15/263	397/18805	0.0377833753148615	2.7015831665246	4.08103047808763	0.000499554167328309	0.0391912138415899	0.0342801832116519	GSTP1/TRAF4/CDK12/GADD45A/NEK10/LTF/ERBB2/SFN/FGFR1/SASH1/PIM1/RGS2/CDC6/TNF/CDKN2B	15
GO:0098754	detoxification	9/263	168/18805	0.0535714285714286	3.83045898967952	4.38882447512283	0.000611412553607722	0.0467804172788286	0.0409183875119983	GSTP1/MT1E/SLC39A8/PIM1/MT1G/GPX8/PXDNL/CP/S100A9	9
GO:0097237	cellular response to toxic substance	8/263	135/18805	0.0592592592592593	4.23714969722574	4.49554361612977	0.000631993271290183	0.0467804172788286	0.0409183875119983	GSTP1/SLC39A8/PIM1/GPX8/TNF/PXDNL/CP/S100A9	8
GO:0048732	gland development	16/263	451/18805	0.0354767184035477	2.53665281208636	3.93390048473473	0.000647227838043199	0.0467804172788286	0.0409183875119983	MED1/PGR/FRS2/HPN/MAFB/MESP1/FGFR1/CADM1/SULF2/ERBB4/FGFR2/TNF/CDKN2B/LBH/NR3C1/FASN	16
GO:0003156	regulation of animal organ formation	4/263	29/18805	0.137931034482759	9.86233119181854	5.68813825428529	0.000674375272534784	0.0467804172788286	0.0409183875119983	FRS2/MESP1/FGFR1/ROBO2	4
GO:0042403	thyroid hormone metabolic process	4/263	29/18805	0.137931034482759	9.86233119181854	5.68813825428529	0.000674375272534784	0.0467804172788286	0.0409183875119983	MED1/CTSB/HPN/CTSK	4
GO:0001558	regulation of cell growth	15/263	410/18805	0.0365853658536585	2.61592321246406	3.93992050254614	0.000695672366210198	0.0467804172788286	0.0409183875119983	NET1/ERBB2/HPN/SFN/MEAF6/CXCR4/RGS2/SPART/FN1/EPHX2/NANOS1/EFNA5/RIMS2/OSGIN1/S100A9	15
GO:0050678	regulation of epithelial cell proliferation	15/263	410/18805	0.0365853658536585	2.61592321246406	3.93992050254614	0.000695672366210198	0.0467804172788286	0.0409183875119983	MED1/PGR/FRS2/ERBB2/HPN/EGFL7/ECM1/SFN/OVOL1/FGFR1/SULF2/FGFR2/TACSTD2/TNF/CDKN2B	15
GO:0048638	regulation of developmental growth	13/263	327/18805	0.0397553516819572	2.84258322577644	4.0031163708606	0.000736129411255874	0.0485109282017621	0.0424320490109175	NPY1R/GDF15/FGFR1/PIM1/CXCR4/ERBB4/RGS2/SPART/FN1/FGFR2/EFNA5/RIMS2/STC2	13
GO:0043367	CD4-positive, alpha-beta T cell differentiation	7/263	107/18805	0.0654205607476635	4.67769446714758	4.54354323107431	0.000767447575213563	0.04876872759979	0.0426575437004153	LGALS1/TMEM98/SOCS1/SOCS3/ANXA1/ASCL2/BATF	7
GO:0046639	negative regulation of alpha-beta T cell differentiation	4/263	30/18805	0.133333333333333	9.53358681875792	5.57092065422189	0.000769643045580904	0.04876872759979	0.0426575437004153	LGALS1/SOCS1/ANXA1/ASCL2	4
GO:0002573	myeloid leukocyte differentiation	11/263	250/18805	0.044	3.14608365019011	4.06828039700666	0.000822940978330633	0.0511620853509328	0.0447509910361326	MED1/KLF10/LTF/MAFB/SOCS1/DHRS2/MT1G/TNF/BATF/NR3C1/FASN	11
GO:0051338	regulation of transferase activity	16/263	463/18805	0.0345572354211663	2.47090803077959	3.81660642613441	0.000855153666354889	0.0518038096898956	0.0453123012318295	GSTP1/TRAF4/CDK12/GADD45A/NEK10/LTF/ERBB2/SFN/FGFR1/SASH1/PIM1/RGS2/CDC6/TNF/CDKN2B/RPL23	16
GO:0051956	negative regulation of amino acid transport	3/263	14/18805	0.214285714285714	15.3218359587181	6.38428805299364	0.000878231896185999	0.0518038096898956	0.0453123012318295	RGS2/TNF/SLC43A1	3
GO:0050792	regulation of viral process	8/263	142/18805	0.0563380281690141	4.02827612060194	4.31393525959589	0.000880428935549061	0.0518038096898956	0.0453123012318295	LGALS1/STOM/LTF/MX1/CXCR4/TMPRSS2/TNF/CXCL8	8
GO:0045581	negative regulation of T cell differentiation	5/263	54/18805	0.0925925925925926	6.62054640191522	4.92592627668614	0.000931239543873784	0.0538321806502477	0.0470864980817437	LGALS1/ERBB2/SOCS1/ANXA1/ASCL2	5
GO:0034311	diol metabolic process	4/263	32/18805	0.125	8.93773764258555	5.35216627040079	0.00098801920804159	0.0540361449797352	0.0472649037471496	ASAH1/DEGS2/SPTSSB/QDPR	4
GO:0060045	positive regulation of cardiac muscle cell proliferation	4/263	32/18805	0.125	8.93773764258555	5.35216627040079	0.00098801920804159	0.0540361449797352	0.0472649037471496	FGFR1/PIM1/ERBB4/FGFR2	4
GO:0060603	mammary gland duct morphogenesis	4/263	32/18805	0.125	8.93773764258555	5.35216627040079	0.00098801920804159	0.0540361449797352	0.0472649037471496	MED1/PGR/FGFR2/NR3C1	4
GO:0030198	extracellular matrix organization	13/263	339/18805	0.0383480825958702	2.74196081070471	3.8545751832809	0.00102366272878431	0.0540361449797352	0.0472649037471496	FKBP10/SMOC2/HPN/PLOD2/SLC39A8/CREB3L1/SULF2/FMOD/CTSK/RAMP2/TNF/COL18A1/PHLDB2	13
GO:1902105	regulation of leukocyte differentiation	13/263	340/18805	0.0382352941176471	2.73389622008499	3.8424887928548	0.00105136644483946	0.0540361449797352	0.0472649037471496	LGALS1/KLF10/LTF/ERBB2/MAFB/SOCS1/ANXA1/TMEM176A/TMEM176B/ASCL2/RHOH/TNF/BATF	13
GO:0045229	external encapsulating structure organization	13/263	341/18805	0.0381231671554252	2.72588	3.83044585219078	0.0010796949047308	0.0540361449797352	0.0472649037471496	FKBP10/SMOC2/HPN/PLOD2/SLC39A8/CREB3L1/SULF2/FMOD/CTSK/RAMP2/TNF/COL18A1/PHLDB2	13
GO:2000027	regulation of animal organ morphogenesis	6/263	83/18805	0.072289156626506	5.16881213065188	4.53314861016116	0.00108502530367702	0.0540361449797352	0.0472649037471496	FRS2/MESP1/FGFR1/ROBO2/TACSTD2/TNF	6
GO:0035860	glial cell-derived neurotrophic factor receptor signaling pathway	3/263	15/18805	0.2	14.3003802281369	6.13721027206515	0.0010864877263319	0.0540361449797352	0.0472649037471496	GFRA1/GDF15/SULF2	3
GO:0031128	developmental induction	4/263	33/18805	0.121212121212121	8.66689710796175	5.24983965757613	0.0011120586647577	0.0540361449797352	0.0472649037471496	FRS2/MESP1/FGFR1/ROBO2	4
GO:0060795	cell fate commitment involved in formation of primary germ layer	4/263	33/18805	0.121212121212121	8.66689710796175	5.24983965757613	0.0011120586647577	0.0540361449797352	0.0472649037471496	KLF4/MESP1/FGFR1/ETS2	4
GO:0071902	positive regulation of protein serine/threonine kinase activity	7/263	114/18805	0.0614035087719298	4.39046761390167	4.32434628756125	0.00111516171733596	0.0540361449797352	0.0472649037471496	NEK10/LTF/ERBB2/FGFR1/SASH1/PIM1/TNF	7
GO:0007389	pattern specification process	16/263	476/18805	0.0336134453781513	2.40342524842637	3.69358487684014	0.00114211066893664	0.0545399225238585	0.0477055531891461	BMPR1B/FRS2/SNAI1/MAFB/MESP1/CELSR2/FGFR1/ETS2/ERBB4/HES6/ROBO2/FGFR2/MEIS3/STC1/NEK8/CHRD	16
GO:0060055	angiogenesis involved in wound healing	4/263	34/18805	0.117647058823529	8.41198836949228	5.15175486608014	0.00124661953778157	0.0586801625284324	0.0513269818713674	SMOC2/CXCR4/TNF/PRCP	4
GO:1903706	regulation of hemopoiesis	15/263	436/18805	0.0344036697247706	2.45992779153731	3.67330145359709	0.00128894157834859	0.0597369017803665	0.0522513016770684	MED1/LGALS1/KLF10/LTF/ERBB2/MAFB/SOCS1/MEAF6/ANXA1/TMEM176A/TMEM176B/ASCL2/RHOH/TNF/BATF	15
GO:0042093	T-helper cell differentiation	6/263	86/18805	0.0697674418604651	4.98850473074542	4.41512213697927	0.00130538511558131	0.0597369017803665	0.0522513016770684	LGALS1/TMEM98/SOCS3/ANXA1/ASCL2/BATF	6
GO:0061043	regulation of vascular wound healing	3/263	16/18805	0.1875	13.4066064638783	5.91270037720443	0.00132345791501267	0.0597369017803665	0.0522513016770684	SMOC2/CXCR4/TNF	3
GO:0001892	embryonic placenta development	6/263	87/18805	0.0689655172413793	4.93116559590927	4.37699399053419	0.00138594741251186	0.0603577276150708	0.0527943321492097	KRT19/MED1/SNAI1/SOCS3/ASCL2/FGFR2	6
GO:0048333	mesodermal cell differentiation	4/263	35/18805	0.114285714285714	8.17164584464965	5.05761105490792	0.00139216609977098	0.0603577276150708	0.0527943321492097	KLF4/MESP1/FGFR1/FGFR2	4
GO:0110110	positive regulation of animal organ morphogenesis	4/263	35/18805	0.114285714285714	8.17164584464965	5.05761105490792	0.00139216609977098	0.0603577276150708	0.0527943321492097	FRS2/MESP1/FGFR1/ROBO2	4
GO:0002294	CD4-positive, alpha-beta T cell differentiation involved in immune response	6/263	88/18805	0.0681818181818182	4.87512962322848	4.33944469006835	0.00147024846942867	0.0623905649131274	0.054572435662373	LGALS1/TMEM98/SOCS3/ANXA1/ASCL2/BATF	6
GO:0002067	glandular epithelial cell differentiation	4/263	36/18805	0.111111111111111	7.94465568229827	4.96713665669888	0.00154916102903729	0.0623905649131274	0.054572435662373	KLF4/PGR/FGFR2/FASN	4
GO:0002287	alpha-beta T cell activation involved in immune response	6/263	89/18805	0.0674157303370786	4.82035288588884	4.30245832921434	0.0015584006491945	0.0623905649131274	0.054572435662373	LGALS1/TMEM98/SOCS3/ANXA1/ASCL2/BATF	6
GO:0002293	alpha-beta T cell differentiation involved in immune response	6/263	89/18805	0.0674157303370786	4.82035288588884	4.30245832921434	0.0015584006491945	0.0623905649131274	0.054572435662373	LGALS1/TMEM98/SOCS3/ANXA1/ASCL2/BATF	6
GO:0045766	positive regulation of angiogenesis	9/263	192/18805	0.046875	3.35165161596958	3.90067814184991	0.0015665288174562	0.0623905649131274	0.054572435662373	KLF4/SMOC2/JUP/ECM1/S100A1/SASH1/CXCR4/RAMP2/CXCL8	9
GO:0034341	response to type II interferon	7/263	121/18805	0.0578512396694215	4.13647361970902	4.12215295119024	0.00157598251977073	0.0623905649131274	0.054572435662373	MED1/STXBP1/PIM1/SLC30A8/HPX/TNF/KYNU	7
GO:0010958	regulation of amino acid import across plasma membrane	3/263	17/18805	0.176470588235294	12.6179825542384	5.7074170995334	0.00159053336956076	0.0623905649131274	0.054572435662373	RGS2/TNF/SLC43A1	3
GO:1903789	regulation of amino acid transmembrane transport	3/263	17/18805	0.176470588235294	12.6179825542384	5.7074170995334	0.00159053336956076	0.0623905649131274	0.054572435662373	RGS2/TNF/SLC43A1	3
GO:0001666	response to hypoxia	12/263	316/18805	0.0379746835443038	2.71526206863359	3.66219968495122	0.00171968045194154	0.0638603073394192	0.0558580054293842	PLAT/PDLIM1/GNGT1/PLOD2/CXCR4/AK4/ITPR2/ASCL2/FGFR2/STC1/TNF/STC2	12
GO:0035821	modulation of process of another organism	7/263	123/18805	0.0569105691056911	4.06921388605521	4.06717382020675	0.0017316247831745	0.0638603073394192	0.0558580054293842	STOM/LTF/LY6E/HPN/PIK3C2G/FASN/S100A9	7
GO:1904018	positive regulation of vasculature development	9/263	195/18805	0.0461538461538462	3.30008774495467	3.84514950331691	0.00174257180153147	0.0638603073394192	0.0558580054293842	KLF4/SMOC2/JUP/ECM1/S100A1/SASH1/CXCR4/RAMP2/CXCL8	9
GO:0002685	regulation of leukocyte migration	10/263	236/18805	0.0423728813559322	3.02974157375781	3.73703527807777	0.00185926321092542	0.0638603073394192	0.0558580054293842	CD99/GDF15/IL1R1/ECM1/ANXA1/MTUS1/ASCL2/TNF/S100A7/CXCL8	10
GO:0010594	regulation of endothelial cell migration	10/263	236/18805	0.0423728813559322	3.02974157375781	3.73703527807777	0.00185926321092542	0.0638603073394192	0.0558580054293842	KLF4/GADD45A/SMOC2/JUP/FGFR1/SASH1/ANXA1/STC1/TNF/PRCP	10
GO:0070371	ERK1 and ERK2 cascade	12/263	319/18805	0.0376175548589342	2.68972668867778	3.62505865453851	0.00186058236750398	0.0638603073394192	0.0558580054293842	GSTP1/FRS2/NEK10/ERBB2/DUSP5/DUSP4/ERBB4/FN1/FGFR2/TNF/S100A7/NDRG2	12
GO:0043370	regulation of CD4-positive, alpha-beta T cell differentiation	5/263	63/18805	0.0793650793650794	5.67475405878448	4.42635031588525	0.00186936156795303	0.0638603073394192	0.0558580054293842	LGALS1/SOCS1/ANXA1/ASCL2/BATF	5
GO:0045765	regulation of angiogenesis	13/263	363/18805	0.0358126721763085	2.56067414553415	3.57590725705651	0.00188451108590493	0.0638603073394192	0.0558580054293842	KLF4/GADD45A/SMOC2/ERBB2/JUP/ECM1/CREB3L1/S100A1/SASH1/CXCR4/RAMP2/TNF/CXCL8	13
GO:0001710	mesodermal cell fate commitment	3/263	18/18805	0.166666666666667	11.9169835234474	5.51867599164307	0.00188903013477167	0.0638603073394192	0.0558580054293842	KLF4/MESP1/FGFR1	3
GO:0010517	regulation of phospholipase activity	3/263	18/18805	0.166666666666667	11.9169835234474	5.51867599164307	0.00188903013477167	0.0638603073394192	0.0558580054293842	FGFR1/RGS2/FGFR2	3
GO:0045064	T-helper 2 cell differentiation	3/263	18/18805	0.166666666666667	11.9169835234474	5.51867599164307	0.00188903013477167	0.0638603073394192	0.0558580054293842	ANXA1/ASCL2/BATF	3
GO:1990748	cellular detoxification	7/263	125/18805	0.056	4.00410646387833	4.01334594968247	0.00189895703704863	0.0638603073394192	0.0558580054293842	GSTP1/SLC39A8/PIM1/GPX8/PXDNL/CP/S100A9	7
GO:0048730	epidermis morphogenesis	4/263	38/18805	0.105263157894737	7.52651590954573	4.79623528150097	0.00189933539279608	0.0638603073394192	0.0558580054293842	KLF4/SNAI1/KLK14/FGFR2	4
GO:0055023	positive regulation of cardiac muscle tissue growth	4/263	38/18805	0.105263157894737	7.52651590954573	4.79623528150097	0.00189933539279608	0.0638603073394192	0.0558580054293842	FGFR1/PIM1/ERBB4/FGFR2	4
GO:0030901	midbrain development	6/263	93/18805	0.0645161290322581	4.61302588004416	4.15984500720863	0.00195180711726755	0.0649616611252179	0.0568213491449075	GNB4/FGFR1/S100A1/FZD6/FGFR2/NDRG2	6
GO:0036005	response to macrophage colony-stimulating factor	5/263	64/18805	0.078125	5.58608602661597	4.37683838776001	0.0020050087626415	0.0654109294346906	0.0572143198761067	ERBB2/FGFR1/ERBB4/FGFR2/TNF	5
GO:0045620	negative regulation of lymphocyte differentiation	5/263	64/18805	0.078125	5.58608602661597	4.37683838776001	0.0020050087626415	0.0654109294346906	0.0572143198761067	LGALS1/ERBB2/SOCS1/ANXA1/ASCL2	5
GO:0048568	embryonic organ development	15/263	457/18805	0.0328227571115974	2.34688953415813	3.47152597986188	0.00203725479242611	0.0658113190298434	0.057564536859264	KRT19/MED1/FRS2/SNAI1/SLITRK6/HPN/MAFB/SOCS3/MESP1/FGFR1/FZD6/ASCL2/FGFR2/TNF/CXCL8	15
GO:0033280	response to vitamin D	4/263	39/18805	0.102564102564103	7.33352832212148	4.71538189444069	0.00209342730001381	0.0660349571032289	0.057760150961949	MED1/PIM1/STC1/STC2	4
GO:0042445	hormone metabolic process	10/263	240/18805	0.0416666666666667	2.97924588086185	3.67521373570439	0.00210262296200618	0.0660349571032289	0.057760150961949	STARD3/MED1/CTSB/HPN/CTSK/SLC30A8/BACE2/DHRS2/STC2/NR3C1	10
GO:0032868	response to insulin	12/263	324/18805	0.037037037037037	2.64821856076609	3.56409506291322	0.00211642606083814	0.0660349571032289	0.057760150961949	GRB14/ERBB2/SESN3/SOCS1/SOCS3/FGFR1/TNFSF10/ERBB4/CTSK/FGFR2/SOCS7/BCAR3	12
GO:0007409	axonogenesis	15/263	459/18805	0.0326797385620915	2.33666343597008	3.45288745935314	0.00212434156386715	0.0660349571032289	0.057760150961949	BMPR1B/EVL/S100A6/SLITRK6/ERBB2/NELL2/STXBP1/PALLD/KIF13B/SPART/ROBO2/FN1/FGFR2/NEFH/EFNA5	15
GO:1901342	regulation of vasculature development	13/263	372/18805	0.0349462365591398	2.49872235169058	3.47711736481386	0.00233274480644619	0.0718354592265438	0.0628337951800262	KLF4/GADD45A/SMOC2/ERBB2/JUP/ECM1/CREB3L1/S100A1/SASH1/CXCR4/RAMP2/TNF/CXCL8	13
GO:0030307	positive regulation of cell growth	8/263	166/18805	0.0481927710843374	3.44587475376792	3.76965548627582	0.00237705186105297	0.0725220915015698	0.063434385921667	ERBB2/HPN/SFN/CXCR4/FN1/EFNA5/RIMS2/S100A9	8
GO:0002292	T cell differentiation involved in immune response	6/263	97/18805	0.0618556701030928	4.42279800870213	4.02511380777057	0.00241610024780567	0.073037158867153	0.0638849104634661	LGALS1/TMEM98/SOCS3/ANXA1/ASCL2/BATF	6
GO:0036293	response to decreased oxygen levels	12/263	330/18805	0.0363636363636364	2.60006913238852	3.49243394454715	0.00246076526794374	0.0737111050715875	0.0644744048194255	PLAT/PDLIM1/GNGT1/PLOD2/CXCR4/AK4/ITPR2/ASCL2/FGFR2/STC1/TNF/STC2	12
GO:0072539	T-helper 17 cell differentiation	4/263	41/18805	0.0975609756097561	6.9757952332375	4.56194064983135	0.00252187491549248	0.0744154387579727	0.0650904788177715	LGALS1/SOCS3/ASCL2/BATF	4
GO:0040013	negative regulation of locomotion	14/263	421/18805	0.0332541567695962	2.37773542985649	3.40495656501013	0.00252944738722092	0.0744154387579727	0.0650904788177715	EVL/KLF4/GADD45A/LDLRAD4/GDF15/JUP/LIMCH1/ERBB4/ROBO2/STC1/TACSTD2/TNF/PHLDB2/CHRD	14
GO:0055021	regulation of cardiac muscle tissue growth	5/263	68/18805	0.0735294117647059	5.25749273093268	4.18873658762006	0.00262023910467289	0.0764043172557271	0.066830131985043	FGFR1/PIM1/ERBB4/RGS2/FGFR2	5
GO:0043903	regulation of biological process involved in symbiotic interaction	4/263	42/18805	0.0952380952380952	6.80970487054137	4.48902768797045	0.0027571197134009	0.0783164608246205	0.0685026658374925	LGALS1/LTF/TMPRSS2/CXCL8	4
GO:0051955	regulation of amino acid transport	4/263	42/18805	0.0952380952380952	6.80970487054137	4.48902768797045	0.0027571197134009	0.0783164608246205	0.0685026658374925	STXBP1/RGS2/TNF/SLC43A1	4
GO:0060421	positive regulation of heart growth	4/263	42/18805	0.0952380952380952	6.80970487054137	4.48902768797045	0.0027571197134009	0.0783164608246205	0.0685026658374925	FGFR1/PIM1/ERBB4/FGFR2	4
GO:0035710	CD4-positive, alpha-beta T cell activation	7/263	134/18805	0.0522388059701493	3.73517394018501	3.78423646995004	0.00281249315505141	0.0786176771966201	0.0687661369425272	LGALS1/TMEM98/SOCS1/SOCS3/ANXA1/ASCL2/BATF	7
GO:0060419	heart growth	6/263	100/18805	0.06	4.29011406844106	3.92877182028168	0.00281544337153298	0.0786176771966201	0.0687661369425272	MESP1/FGFR1/PIM1/ERBB4/RGS2/FGFR2	6
GO:0048639	positive regulation of developmental growth	8/263	171/18805	0.0467836257309941	3.34511818202032	3.66888796890109	0.00285481117569955	0.0790470825540338	0.0691417337378626	FGFR1/PIM1/CXCR4/ERBB4/FN1/FGFR2/EFNA5/RIMS2	8
GO:0042359	vitamin D metabolic process	3/263	21/18805	0.142857142857143	10.2145573058121	5.03170058270971	0.00298513214053014	0.0806230360905477	0.0705202053560961	SNAI1/FGFR1/TNF	3
GO:0045623	negative regulation of T-helper cell differentiation	3/263	21/18805	0.142857142857143	10.2145573058121	5.03170058270971	0.00298513214053014	0.0806230360905477	0.0705202053560961	LGALS1/ANXA1/ASCL2	3
GO:0097501	stress response to metal ion	3/263	21/18805	0.142857142857143	10.2145573058121	5.03170058270971	0.00298513214053014	0.0806230360905477	0.0705202053560961	MT1E/SLC39A8/MT1G	3
GO:0070372	regulation of ERK1 and ERK2 cascade	11/263	296/18805	0.0371621621621622	2.65717	3.42251138450758	0.00312276500826973	0.083654558554868	0.0731718493165813	GSTP1/FRS2/NEK10/ERBB2/DUSP4/ERBB4/FN1/FGFR2/TNF/S100A7/NDRG2	11
GO:0043406	positive regulation of MAP kinase activity	5/263	71/18805	0.0704225352112676	5.03534515075242	4.05713361045937	0.00316391491499565	0.083872691559005	0.073362648187383	NEK10/ERBB2/FGFR1/SASH1/TNF	5
GO:0030879	mammary gland development	7/263	137/18805	0.0510948905109489	3.65338181010796	3.71223825752248	0.00318181682697287	0.083872691559005	0.073362648187383	MED1/PGR/ERBB4/FGFR2/LBH/NR3C1/FASN	7
GO:0042092	type 2 immune response	4/263	44/18805	0.0909090909090909	6.50017283097131	4.35010149743657	0.00327183733676124	0.0852124823718115	0.0745345505100296	ECM1/ANXA1/ASCL2/BATF	4
GO:0046632	alpha-beta T cell differentiation	7/263	138/18805	0.0507246376811594	3.6269080288753	3.68868741908172	0.00331280844791789	0.0852124823718115	0.0745345505100296	LGALS1/TMEM98/SOCS1/SOCS3/ANXA1/ASCL2/BATF	7
GO:0030336	negative regulation of cell migration	13/263	388/18805	0.0335051546391753	2.39568225471365	3.30839748959306	0.00334471094248182	0.0852124823718115	0.0745345505100296	EVL/KLF4/GADD45A/LDLRAD4/GDF15/JUP/LIMCH1/ERBB4/STC1/TACSTD2/TNF/PHLDB2/CHRD	13
GO:0048863	stem cell differentiation	10/263	256/18805	0.0390625	2.79304301330798	3.44013231777184	0.00334512314025488	0.0852124823718115	0.0745345505100296	MED1/CDK12/FGFR1/ERBB4/FN1/FGFR2/TACSTD2/BATF/EPOP/LBH	10
GO:0043124	negative regulation of canonical NF-kappaB signal transduction	5/263	72/18805	0.0694444444444444	4.96540980143642	4.01490584098334	0.00336194922862989	0.0852124823718115	0.0745345505100296	GSTP1/KLF4/PYDC1/SLC39A8/RHOH	5
GO:0018149	peptide cross-linking	3/263	22/18805	0.136363636363636	9.75025924645696	4.8907390187513	0.00342105408619253	0.0853967667727606	0.07469574232851	ANXA1/FN1/CSTA	3
GO:0060445	branching involved in salivary gland morphogenesis	3/263	22/18805	0.136363636363636	9.75025924645696	4.8907390187513	0.00342105408619253	0.0853967667727606	0.07469574232851	FGFR1/FGFR2/TNF	3
GO:0043122	regulation of canonical NF-kappaB signal transduction	11/263	300/18805	0.0366666666666667	2.62173637515843	3.37225997304941	0.00345695112347722	0.0856440146756199	0.0749120077252128	GSTP1/TRAF4/KLF4/PYDC1/LGALS1/LTF/SLC39A8/ECM1/TNFSF10/RHOH/TNF	11
GO:0030216	keratinocyte differentiation	8/263	177/18805	0.0451977401129944	3.23172434534167	3.55278377446557	0.00352353647689743	0.0866421842640076	0.0757850972014544	MED1/ASAH1/SFN/MAFB/ANXA1/PALLD/S100A7/CSTA	8
GO:0007498	mesoderm development	7/263	140/18805	0.05	3.57509505703422	3.64223524871053	0.00358710114751556	0.0875518391189908	0.0765807636795134	KLF4/SNAI1/OVOL1/MESP1/FGFR1/ETS2/FGFR2	7
GO:0032869	cellular response to insulin stimulus	10/263	260/18805	0.0384615384615385	2.75007312079555	3.3841854728289	0.00373259270948409	0.0886342430191311	0.0775275321096976	GRB14/ERBB2/SESN3/SOCS1/SOCS3/FGFR1/ERBB4/FGFR2/SOCS7/BCAR3	10
GO:0050673	epithelial cell proliferation	15/263	488/18805	0.0307377049180328	2.19780433834071	3.19295889152964	0.00377708961784443	0.0886342430191311	0.0775275321096976	MED1/PGR/FRS2/ERBB2/HPN/EGFL7/ECM1/SFN/OVOL1/FGFR1/SULF2/FGFR2/TACSTD2/TNF/CDKN2B	15
GO:0060420	regulation of heart growth	5/263	74/18805	0.0675675675675676	4.83120953653273	3.93274683425819	0.00378451507728536	0.0886342430191311	0.0775275321096976	FGFR1/PIM1/ERBB4/RGS2/FGFR2	5
GO:0060443	mammary gland morphogenesis	4/263	46/18805	0.0869565217391304	6.21755662092908	4.2195481980093	0.00384837618768232	0.0886342430191311	0.0775275321096976	MED1/PGR/FGFR2/NR3C1	4
GO:0031290	retinal ganglion cell axon guidance	3/263	23/18805	0.130434782608696	9.32633493139362	4.75851654514434	0.00389393064581852	0.0886342430191311	0.0775275321096976	BMPR1B/ROBO2/EFNA5	3
GO:0032891	negative regulation of organic acid transport	3/263	23/18805	0.130434782608696	9.32633493139362	4.75851654514434	0.00389393064581852	0.0886342430191311	0.0775275321096976	RGS2/TNF/SLC43A1	3
GO:0034312	diol biosynthetic process	3/263	23/18805	0.130434782608696	9.32633493139362	4.75851654514434	0.00389393064581852	0.0886342430191311	0.0775275321096976	ASAH1/SPTSSB/QDPR	3
GO:0046519	sphingoid metabolic process	3/263	23/18805	0.130434782608696	9.32633493139362	4.75851654514434	0.00389393064581852	0.0886342430191311	0.0775275321096976	ASAH1/DEGS2/SPTSSB	3
GO:0061687	detoxification of inorganic compound	3/263	23/18805	0.130434782608696	9.32633493139362	4.75851654514434	0.00389393064581852	0.0886342430191311	0.0775275321096976	MT1E/SLC39A8/MT1G	3
GO:0038127	ERBB signaling pathway	8/263	180/18805	0.0444444444444444	3.17786227291931	3.49657808007324	0.00390044468521214	0.0886342430191311	0.0775275321096976	GRB7/REPS2/ERBB2/FGFR1/CADM1/ERBB4/FGFR2/BCAR3	8
GO:0002064	epithelial cell development	9/263	221/18805	0.0407239819004525	2.91184212790118	3.40489146442844	0.00402577469794041	0.0903942804942829	0.0790670202039283	PGR/FRS2/SFN/CXCR4/PALLD/STC1/TNF/COL18A1/FASN	9
GO:0035265	organ growth	8/263	181/18805	0.0441988950276243	3.16030502279268	3.47810419720577	0.00403276456226391	0.0903942804942829	0.0790670202039283	ECM1/MESP1/FGFR1/PIM1/ERBB4/RGS2/FGFR2/STC1	8
GO:0016049	cell growth	15/263	492/18805	0.0304878048780488	2.17993601038672	3.15853698283344	0.00407121646384392	0.0906395827592278	0.0792815837695921	NET1/ERBB2/HPN/SFN/MEAF6/CXCR4/RGS2/SPART/FN1/EPHX2/NANOS1/EFNA5/RIMS2/OSGIN1/S100A9	15
GO:0043434	response to peptide hormone	15/263	494/18805	0.0303643724696356	2.17111035852281	3.14144870408694	0.0042251569530269	0.0922252685794147	0.0806685681240915	GRB14/ERBB2/GDF15/SESN3/SOCS1/SOCS3/FGFR1/TNFSF10/ERBB4/CTSK/FGFR2/SOCS7/CDC6/STC2/BCAR3	15
GO:0001707	mesoderm formation	5/263	76/18805	0.0657894736842105	4.70407244346608	3.85348506726796	0.00424383189595384	0.0922252685794147	0.0806685681240915	KLF4/SNAI1/MESP1/FGFR1/FGFR2	5
GO:0043534	blood vessel endothelial cell migration	8/263	183/18805	0.0437158469945355	3.12576617008456	3.44153810256918	0.00430777859865254	0.0922252685794147	0.0806685681240915	KLF4/GADD45A/JUP/FGFR1/ANXA1/ID1/TNF/PRCP	8
GO:0051851	host-mediated perturbation of symbiont process	6/263	109/18805	0.055045871559633	3.93588446645969	3.66102392933228	0.00431183814613487	0.0922252685794147	0.0806685681240915	STOM/LTF/LY6E/HPN/PIK3C2G/FASN	6
GO:0009581	detection of external stimulus	7/263	145/18805	0.0482758620689655	3.45181591713649	3.52972400651545	0.00434845565422772	0.0922252685794147	0.0806685681240915	GNGT1/HPN/JUP/CXCR4/TNF/LXN/REEP6	7
GO:0045063	T-helper 1 cell differentiation	3/263	24/18805	0.125	8.93773764258555	4.63412465856943	0.00440467358525907	0.0922252685794147	0.0806685681240915	TMEM98/ANXA1/ASCL2	3
GO:0071294	cellular response to zinc ion	3/263	24/18805	0.125	8.93773764258555	4.63412465856943	0.00440467358525907	0.0922252685794147	0.0806685681240915	MT1E/ATP13A2/MT1G	3
GO:0097066	response to thyroid hormone	3/263	24/18805	0.125	8.93773764258555	4.63412465856943	0.00440467358525907	0.0922252685794147	0.0806685681240915	MED1/CTSB/HPN	3
GO:0009880	embryonic pattern specification	5/263	77/18805	0.0649350649350649	4.64298059355094	3.81488303634642	0.00448780268036067	0.0922252685794147	0.0806685681240915	FRS2/MESP1/ERBB4/FGFR2/MEIS3	5
GO:0010837	regulation of keratinocyte proliferation	4/263	48/18805	0.0833333333333333	5.9584917617237	4.09650257915262	0.00449007109044868	0.0922252685794147	0.0806685681240915	MED1/SFN/OVOL1/FGFR2	4
GO:0097028	dendritic cell differentiation	4/263	48/18805	0.0833333333333333	5.9584917617237	4.09650257915262	0.00449007109044868	0.0922252685794147	0.0806685681240915	TMEM176A/TMEM176B/DHRS2/BATF	4
GO:0042472	inner ear morphogenesis	6/263	110/18805	0.0545454545454545	3.90010369858279	3.63305390872162	0.00450844269766776	0.0922252685794147	0.0806685681240915	SLITRK6/HPN/MAFB/FGFR1/FZD6/FGFR2	6
GO:0001889	liver development	7/263	146/18805	0.0479452054794521	3.42817334236158	3.5078146665103	0.00451435156080139	0.0922252685794147	0.0806685681240915	MED1/HPN/MESP1/CADM1/SULF2/TNF/CDKN2B	7
GO:2000146	negative regulation of cell motility	13/263	403/18805	0.032258064516129	2.30651294002208	3.15760959054261	0.0045934835652605	0.0922252685794147	0.0806685681240915	EVL/KLF4/GADD45A/LDLRAD4/GDF15/JUP/LIMCH1/ERBB4/STC1/TACSTD2/TNF/PHLDB2/CHRD	13
GO:0009582	detection of abiotic stimulus	7/263	147/18805	0.0476190476190476	3.40485243527069	3.48609536016491	0.00468498366703376	0.0922252685794147	0.0806685681240915	GNGT1/HPN/JUP/CXCR4/TNF/LXN/REEP6	7
GO:0051961	negative regulation of nervous system development	7/263	147/18805	0.0476190476190476	3.40485243527069	3.48609536016491	0.00468498366703376	0.0922252685794147	0.0806685681240915	PCM1/TMEM98/SPART/ROBO2/ASCL2/TNF/CDKN2B	7
GO:0070482	response to oxygen levels	12/263	358/18805	0.0335195530726257	2.39671177007881	3.1776798460051	0.00472318417977807	0.0922252685794147	0.0806685681240915	PLAT/PDLIM1/GNGT1/PLOD2/CXCR4/AK4/ITPR2/ASCL2/FGFR2/STC1/TNF/STC2	12
GO:0048332	mesoderm morphogenesis	5/263	78/18805	0.0641025641025641	4.58345520132592	3.77693823451112	0.00474159658200933	0.0922252685794147	0.0806685681240915	KLF4/SNAI1/MESP1/FGFR1/FGFR2	5
GO:0016485	protein processing	9/263	227/18805	0.039647577092511	2.83487713773639	3.31241807588201	0.00478993738519027	0.0922252685794147	0.0806685681240915	PRKACB/PLAT/TMEM98/HPN/MAFB/SLC30A8/TMPRSS2/BACE2/CPD	9
GO:0036323	vascular endothelial growth factor receptor-1 signaling pathway	4/263	49/18805	0.0816326530612245	5.83688988903546	4.03755857547186	0.00483636518349045	0.0922252685794147	0.0806685681240915	ERBB2/FGFR1/ERBB4/FGFR2	4
GO:0042088	T-helper 1 type immune response	4/263	49/18805	0.0816326530612245	5.83688988903546	4.03755857547186	0.00483636518349045	0.0922252685794147	0.0806685681240915	TMEM98/IL1R1/ANXA1/ASCL2	4
GO:0045622	regulation of T-helper cell differentiation	4/263	49/18805	0.0816326530612245	5.83688988903546	4.03755857547186	0.00483636518349045	0.0922252685794147	0.0806685681240915	LGALS1/ANXA1/ASCL2/BATF	4
GO:0060043	regulation of cardiac muscle cell proliferation	4/263	49/18805	0.0816326530612245	5.83688988903546	4.03755857547186	0.00483636518349045	0.0922252685794147	0.0806685681240915	FGFR1/PIM1/ERBB4/FGFR2	4
GO:1901888	regulation of cell junction assembly	10/263	270/18805	0.037037037037037	2.64821856076609	3.24881584415072	0.00485807706501278	0.0922252685794147	0.0806685681240915	FARP1/SNAI1/SLITRK6/FGFR1/LIMCH1/ROBO2/EFNA5/TNF/PHLDB2/CLSTN2	10
GO:0042537	benzene-containing compound metabolic process	3/263	25/18805	0.12	8.58022813688213	4.51678266468443	0.00495413430608692	0.0922252685794147	0.0806685681240915	CYP4B1/EPHX2/KYNU	3
GO:0043371	negative regulation of CD4-positive, alpha-beta T cell differentiation	3/263	25/18805	0.12	8.58022813688213	4.51678266468443	0.00495413430608692	0.0922252685794147	0.0806685681240915	LGALS1/ANXA1/ASCL2	3
GO:0046697	decidualization	3/263	25/18805	0.12	8.58022813688213	4.51678266468443	0.00495413430608692	0.0922252685794147	0.0806685681240915	CTSB/STC1/STC2	3
GO:0061042	vascular wound healing	3/263	25/18805	0.12	8.58022813688213	4.51678266468443	0.00495413430608692	0.0922252685794147	0.0806685681240915	SMOC2/CXCR4/TNF	3
GO:0072540	T-helper 17 cell lineage commitment	3/263	25/18805	0.12	8.58022813688213	4.51678266468443	0.00495413430608692	0.0922252685794147	0.0806685681240915	LGALS1/SOCS3/BATF	3
GO:0061008	hepaticobiliary system development	7/263	149/18805	0.0469798657718121	3.35914971801873	3.44321449615219	0.00504079244507844	0.0933112983513116	0.0816185080699277	MED1/HPN/MESP1/CADM1/SULF2/TNF/CDKN2B	7
GO:0044788	modulation by host of viral process	4/263	50/18805	0.08	5.72015209125475	3.98022082464086	0.00520014986237661	0.0951916322029495	0.0832632182642523	STOM/LTF/PIK3C2G/FASN	4
GO:0046636	negative regulation of alpha-beta T cell activation	4/263	50/18805	0.08	5.72015209125475	3.98022082464086	0.00520014986237661	0.0951916322029495	0.0832632182642523	LGALS1/SOCS1/ANXA1/ASCL2	4
GO:0007249	canonical NF-kappaB signal transduction	11/263	318/18805	0.0345911949685535	2.47333620297965	3.15578136289496	0.00533275852139153	0.0970797752927353	0.0849147591251527	GSTP1/TRAF4/KLF4/PYDC1/LGALS1/LTF/SLC39A8/ECM1/TNFSF10/RHOH/TNF	11
GO:0002082	regulation of oxidative phosphorylation	3/263	26/18805	0.115384615384615	8.25021936238666	4.4058154030137	0.00554310572281908	0.098008053008861	0.0857267148433069	DNAJC15/AK4/TNF	3
GO:0035988	chondrocyte proliferation	3/263	26/18805	0.115384615384615	8.25021936238666	4.4058154030137	0.00554310572281908	0.098008053008861	0.0857267148433069	BMPR1B/LTF/STC1	3
GO:0051953	negative regulation of amine transport	3/263	26/18805	0.115384615384615	8.25021936238666	4.4058154030137	0.00554310572281908	0.098008053008861	0.0857267148433069	RGS2/TNF/SLC43A1	3
GO:0071276	cellular response to cadmium ion	3/263	26/18805	0.115384615384615	8.25021936238666	4.4058154030137	0.00554310572281908	0.098008053008861	0.0857267148433069	MT1E/SLC39A8/MT1G	3
GO:0061138	morphogenesis of a branching epithelium	8/263	191/18805	0.0418848167539267	2.99484402683495	3.30012568785443	0.00555482412736943	0.098008053008861	0.0857267148433069	MED1/PGR/FRS2/SOCS3/FGFR1/FGFR2/TACSTD2/TNF	8
GO:0046637	regulation of alpha-beta T cell differentiation	5/263	81/18805	0.0617283950617284	4.41369760127681	3.66684833413797	0.0055640112857397	0.098008053008861	0.0857267148433069	LGALS1/SOCS1/ANXA1/ASCL2/BATF	5
GO:1903900	regulation of viral life cycle	6/263	115/18805	0.0521739130434783	3.73053397255745	3.49797386951995	0.00559196174982272	0.098008053008861	0.0857267148433069	LGALS1/LTF/MX1/TMPRSS2/TNF/CXCL8	6
GO:0071375	cellular response to peptide hormone stimulus	12/263	369/18805	0.032520325203252	2.32526507774583	3.06201486312866	0.00597407523607269	0.102123223735461	0.0893262156657428	GRB14/ERBB2/GDF15/SESN3/SOCS1/SOCS3/FGFR1/ERBB4/FGFR2/SOCS7/CDC6/BCAR3	12
GO:0036215	response to stem cell factor	4/263	52/18805	0.0769230769230769	5.50014624159111	3.87005938717715	0.00598172448587069	0.102123223735461	0.0893262156657428	ERBB2/FGFR1/ERBB4/FGFR2	4
GO:0036216	cellular response to stem cell factor stimulus	4/263	52/18805	0.0769230769230769	5.50014624159111	3.87005938717715	0.00598172448587069	0.102123223735461	0.0893262156657428	ERBB2/FGFR1/ERBB4/FGFR2	4
GO:0038109	Kit signaling pathway	4/263	52/18805	0.0769230769230769	5.50014624159111	3.87005938717715	0.00598172448587069	0.102123223735461	0.0893262156657428	ERBB2/FGFR1/ERBB4/FGFR2	4
GO:0043457	regulation of cellular respiration	4/263	52/18805	0.0769230769230769	5.50014624159111	3.87005938717715	0.00598172448587069	0.102123223735461	0.0893262156657428	DNAJC15/CISD1/AK4/TNF	4
GO:0002053	positive regulation of mesenchymal cell proliferation	3/263	27/18805	0.111111111111111	7.94465568229827	4.30063554467322	0.00617232409468845	0.104296450728197	0.0912271167139378	FGFR1/FGFR2/CHRD	3
GO:0021846	cell proliferation in forebrain	3/263	27/18805	0.111111111111111	7.94465568229827	4.30063554467322	0.00617232409468845	0.104296450728197	0.0912271167139378	PCM1/FGFR1/FGFR2	3
GO:0010043	response to zinc ion	4/263	53/18805	0.0754716981132075	5.39636989741014	3.81709589184539	0.0064002616477853	0.107050061570825	0.0936356740135514	MT1E/ATP13A2/SLC30A8/MT1G	4
GO:0060688	regulation of morphogenesis of a branching structure	4/263	53/18805	0.0754716981132075	5.39636989741014	3.81709589184539	0.0064002616477853	0.107050061570825	0.0936356740135514	FGFR1/FGFR2/TACSTD2/TNF	4
GO:0051952	regulation of amine transport	5/263	84/18805	0.0595238095238095	4.25606554408836	3.56199222456653	0.0064823226156805	0.107875015245794	0.0943572531724254	STXBP1/RGS2/TNF/SLC43A1/SNCG	5
GO:0043535	regulation of blood vessel endothelial cell migration	7/263	157/18805	0.0445859872611465	3.18798285340631	3.27870480625844	0.00667036113097605	0.109980201602913	0.0961986397216759	KLF4/GADD45A/JUP/FGFR1/ANXA1/TNF/PRCP	7
GO:0048013	ephrin receptor signaling pathway	5/263	85/18805	0.0588235294117647	4.20599418474614	3.52812511738351	0.00681068962863686	0.109980201602913	0.0961986397216759	ERBB2/FGFR1/ERBB4/FGFR2/EFNA5	5
GO:2000514	regulation of CD4-positive, alpha-beta T cell activation	5/263	85/18805	0.0588235294117647	4.20599418474614	3.52812511738351	0.00681068962863686	0.109980201602913	0.0961986397216759	LGALS1/SOCS1/ANXA1/ASCL2/BATF	5
GO:0038145	macrophage colony-stimulating factor signaling pathway	4/263	54/18805	0.0740740740740741	5.29643712153218	3.7654581956433	0.00683778341609822	0.109980201602913	0.0961986397216759	ERBB2/FGFR1/ERBB4/FGFR2	4
GO:0046622	positive regulation of organ growth	4/263	54/18805	0.0740740740740741	5.29643712153218	3.7654581956433	0.00683778341609822	0.109980201602913	0.0961986397216759	FGFR1/PIM1/ERBB4/FGFR2	4
GO:0003416	endochondral bone growth	3/263	28/18805	0.107142857142857	7.66091797935904	4.20072939278946	0.00684247081292783	0.109980201602913	0.0961986397216759	ECM1/FGFR2/STC1	3
GO:0052372	modulation by symbiont of entry into host	3/263	28/18805	0.107142857142857	7.66091797935904	4.20072939278946	0.00684247081292783	0.109980201602913	0.0961986397216759	LGALS1/TMPRSS2/CXCL8	3
GO:0007173	epidermal growth factor receptor signaling pathway	7/263	158/18805	0.0443037974683544	3.16780574673918	3.25888569901255	0.0068986722659347	0.110345267554635	0.0965179594487952	GRB7/REPS2/ERBB2/FGFR1/ERBB4/FGFR2/BCAR3	7
GO:0031547	brain-derived neurotrophic factor receptor signaling pathway	4/263	55/18805	0.0727272727272727	5.20013826477705	3.71508712429938	0.00729464295837695	0.11500406003757	0.100592961067923	ERBB2/FGFR1/ERBB4/FGFR2	4
GO:0035790	platelet-derived growth factor receptor-alpha signaling pathway	4/263	55/18805	0.0727272727272727	5.20013826477705	3.71508712429938	0.00729464295837695	0.11500406003757	0.100592961067923	ERBB2/FGFR1/ERBB4/FGFR2	4
GO:0072538	T-helper 17 type immune response	4/263	55/18805	0.0727272727272727	5.20013826477705	3.71508712429938	0.00729464295837695	0.11500406003757	0.100592961067923	LGALS1/SOCS3/ASCL2/BATF	4
GO:0001667	ameboidal-type cell migration	9/263	243/18805	0.037037037037037	2.64821856076609	3.07985492834008	0.00738414193022466	0.115860703143287	0.101342258671454	EVL/PDLIM1/SNAI1/MESP1/SASH1/ERBB4/FN1/NANOS1/TACSTD2	9
GO:0060759	regulation of response to cytokine stimulus	8/263	201/18805	0.0398009950248756	2.84584681156953	3.13339557756368	0.00748051996119144	0.116816650578795	0.102178416830841	GSTP1/KLF4/MED1/PYDC1/IL1R1/ECM1/CXCR4/HPX	8
GO:0002295	T-helper cell lineage commitment	3/263	29/18805	0.103448275862069	7.3967483938639	4.10564539449456	0.00755417414451165	0.116859172798901	0.102215610613654	LGALS1/SOCS3/BATF	3
GO:2000319	regulation of T-helper 17 cell differentiation	3/263	29/18805	0.103448275862069	7.3967483938639	4.10564539449456	0.00755417414451165	0.116859172798901	0.102215610613654	LGALS1/ASCL2/BATF	3
GO:0003002	regionalization	13/263	430/18805	0.0302325581395349	2.16168538332302	2.9022430910819	0.00777061664425877	0.119645709545947	0.104652967889722	BMPR1B/FRS2/SNAI1/MAFB/MESP1/CELSR2/FGFR1/ETS2/HES6/ROBO2/FGFR2/NEK8/CHRD	13
GO:0045446	endothelial cell differentiation	6/263	124/18805	0.0483870967741935	3.45976941003312	3.2728785195655	0.00800422074590876	0.120316263436219	0.105239495020643	MESP1/CXCR4/STC1/TNF/COL18A1/FASN	6
GO:0009138	pyrimidine nucleoside diphosphate metabolic process	2/263	10/18805	0.2	14.3003802281369	5.01034462409773	0.00814280022648769	0.120316263436219	0.105239495020643	ENTPD5/ENTPD4	2
GO:0036109	alpha-linolenic acid metabolic process	2/263	10/18805	0.2	14.3003802281369	5.01034462409773	0.00814280022648769	0.120316263436219	0.105239495020643	FADS1/FADS2	2
GO:0042368	vitamin D biosynthetic process	2/263	10/18805	0.2	14.3003802281369	5.01034462409773	0.00814280022648769	0.120316263436219	0.105239495020643	SNAI1/TNF	2
GO:0060525	prostate glandular acinus development	2/263	10/18805	0.2	14.3003802281369	5.01034462409773	0.00814280022648769	0.120316263436219	0.105239495020643	FRS2/FGFR2	2
GO:0060536	cartilage morphogenesis	2/263	10/18805	0.2	14.3003802281369	5.01034462409773	0.00814280022648769	0.120316263436219	0.105239495020643	SNAI1/STC1	2
GO:0071421	manganese ion transmembrane transport	2/263	10/18805	0.2	14.3003802281369	5.01034462409773	0.00814280022648769	0.120316263436219	0.105239495020643	SLC39A8/ATP13A1	2
GO:1901856	negative regulation of cellular respiration	2/263	10/18805	0.2	14.3003802281369	5.01034462409773	0.00814280022648769	0.120316263436219	0.105239495020643	DNAJC15/TNF	2
GO:1905770	regulation of mesodermal cell differentiation	2/263	10/18805	0.2	14.3003802281369	5.01034462409773	0.00814280022648769	0.120316263436219	0.105239495020643	MESP1/FGFR1	2
GO:0050982	detection of mechanical stimulus	4/263	57/18805	0.0701754385964912	5.01767727303048	3.61792626000029	0.0082677454040268	0.121617058510126	0.106377288140157	HPN/JUP/CXCR4/TNF	4
GO:0062149	detection of stimulus involved in sensory perception of pain	3/263	30/18805	0.1	7.15019011406844	4.01498477270336	0.00830801093328172	0.121666204556281	0.10642027572082	CXCR4/TNF/LXN	3
GO:0038063	collagen-activated tyrosine kinase receptor signaling pathway	4/263	58/18805	0.0689655172413793	4.93116559590927	3.57103537677554	0.00878465156157208	0.128077110156549	0.112027834073518	ERBB2/FGFR1/ERBB4/FGFR2	4
GO:0045165	cell fate commitment	10/263	295/18805	0.0338983050847458	2.42379325900625	2.9354821114375	0.00884837736319734	0.128437900492226	0.112343413959816	KLF4/LGALS1/SOCS3/MESP1/FGFR1/ETS2/ERBB4/FGFR2/BATF/EPOP	10
GO:0002274	myeloid leukocyte activation	9/263	251/18805	0.0358565737051793	2.56381318831139	2.97048704834639	0.0090288861313984	0.129867336426883	0.113593728020703	STXBP1/ANXA1/FN1/DHRS2/MT1G/RHOH/TNF/BATF/CXCL8	9
GO:0001763	morphogenesis of a branching structure	8/263	208/18805	0.0384615384615385	2.75007312079555	3.02267270033904	0.00910147417593929	0.129867336426883	0.113593728020703	MED1/PGR/FRS2/SOCS3/FGFR1/FGFR2/TACSTD2/TNF	8
GO:0002825	regulation of T-helper 1 type immune response	3/263	31/18805	0.0967741935483871	6.91953882006623	3.92839383012112	0.00910450825936568	0.129867336426883	0.113593728020703	IL1R1/ANXA1/ASCL2	3
GO:0098868	bone growth	3/263	31/18805	0.0967741935483871	6.91953882006623	3.92839383012112	0.00910450825936568	0.129867336426883	0.113593728020703	ECM1/FGFR2/STC1	3
GO:0055017	cardiac muscle tissue growth	5/263	92/18805	0.0543478260869565	3.88597288808067	3.30475416697444	0.00944128967822385	0.134090730559257	0.117287890830204	FGFR1/PIM1/ERBB4/RGS2/FGFR2	5
GO:0045860	positive regulation of protein kinase activity	8/263	210/18805	0.0380952380952381	2.72388194821655	2.99187734406451	0.00960942196408153	0.13453355922489	0.117675228865985	TRAF4/NEK10/LTF/ERBB2/FGFR1/SASH1/PIM1/TNF	8
GO:0051216	cartilage development	8/263	210/18805	0.0380952380952381	2.72388194821655	2.99187734406451	0.00960942196408153	0.13453355922489	0.117675228865985	BMPR1B/MBOAT2/SNAI1/ECM1/FGFR1/SULF2/CTSK/STC1	8
GO:0021889	olfactory bulb interneuron differentiation	2/263	11/18805	0.181818181818182	13.0003456619426	4.74138470328746	0.00986105131609255	0.13453355922489	0.117675228865985	ERBB4/ROBO2	2
GO:0045625	regulation of T-helper 1 cell differentiation	2/263	11/18805	0.181818181818182	13.0003456619426	4.74138470328746	0.00986105131609255	0.13453355922489	0.117675228865985	ANXA1/ASCL2	2
GO:0071578	zinc ion import across plasma membrane	2/263	11/18805	0.181818181818182	13.0003456619426	4.74138470328746	0.00986105131609255	0.13453355922489	0.117675228865985	SLC39A8/SLC30A8	2
GO:0000079	regulation of cyclin-dependent protein serine/threonine kinase activity	4/263	60/18805	0.0666666666666667	4.76679340937896	3.48040201823414	0.00988076519952154	0.13453355922489	0.117675228865985	GADD45A/PIM1/CDC6/CDKN2B	4
GO:0036006	cellular response to macrophage colony-stimulating factor stimulus	4/263	60/18805	0.0666666666666667	4.76679340937896	3.48040201823414	0.00988076519952154	0.13453355922489	0.117675228865985	ERBB2/FGFR1/ERBB4/FGFR2	4
GO:0043616	keratinocyte proliferation	4/263	60/18805	0.0666666666666667	4.76679340937896	3.48040201823414	0.00988076519952154	0.13453355922489	0.117675228865985	MED1/SFN/OVOL1/FGFR2	4
GO:0048012	hepatocyte growth factor receptor signaling pathway	4/263	60/18805	0.0666666666666667	4.76679340937896	3.48040201823414	0.00988076519952154	0.13453355922489	0.117675228865985	ERBB2/FGFR1/ERBB4/FGFR2	4
GO:0070613	regulation of protein processing	4/263	60/18805	0.0666666666666667	4.76679340937896	3.48040201823414	0.00988076519952154	0.13453355922489	0.117675228865985	PRKACB/PLAT/TMEM98/HPN	4
GO:0043373	CD4-positive, alpha-beta T cell lineage commitment	3/263	32/18805	0.09375	6.70330323193916	3.84555758357236	0.00994414505777852	0.134794185339416	0.117903196057606	LGALS1/SOCS3/BATF	3
GO:0050900	leukocyte migration	12/263	395/18805	0.030379746835443	2.17220965490687	2.80415267028568	0.00998172419508878	0.134794185339416	0.117903196057606	CD99/GDF15/IL1R1/ECM1/ANXA1/CXCR4/MTUS1/ASCL2/TNF/S100A7/CXCL8/S100A9	12
GO:0033273	response to vitamin	5/263	94/18805	0.0531914893617021	3.80329261386619	3.24495416890349	0.0103053615766825	0.138424168834654	0.12107830820838	MED1/PIM1/STC1/KYNU/STC2	5
GO:0042471	ear morphogenesis	6/263	131/18805	0.0458015267175573	3.27489623545119	3.11173976493943	0.0103399856064675	0.138424168834654	0.12107830820838	SLITRK6/HPN/MAFB/FGFR1/FZD6/FGFR2	6
GO:0001706	endoderm formation	4/263	61/18805	0.0655737704918033	4.68864925512685	3.43657517084831	0.0104605821061696	0.138424168834654	0.12107830820838	DUSP5/MESP1/DUSP4/FN1	4
GO:0001961	positive regulation of cytokine-mediated signaling pathway	4/263	61/18805	0.0655737704918033	4.68864925512685	3.43657517084831	0.0104605821061696	0.138424168834654	0.12107830820838	MED1/IL1R1/CXCR4/HPX	4
GO:0060038	cardiac muscle cell proliferation	4/263	61/18805	0.0655737704918033	4.68864925512685	3.43657517084831	0.0104605821061696	0.138424168834654	0.12107830820838	FGFR1/PIM1/ERBB4/FGFR2	4
GO:0031669	cellular response to nutrient levels	9/263	258/18805	0.0348837209302326	2.49425236537271	2.8782046872788	0.0106836716793074	0.140810792733271	0.123165865507131	DNAJC15/MED1/KLF10/SESN3/PIM1/CTSK/WDR24/FADS1/CDKN2B	9
GO:0038084	vascular endothelial growth factor signaling pathway	5/263	95/18805	0.0526315789473684	3.76325795477286	3.21566682327713	0.010757069514636	0.140840539654307	0.123191884856958	SMOC2/ERBB2/FGFR1/ERBB4/FGFR2	5
GO:0002063	chondrocyte development	3/263	33/18805	0.0909090909090909	6.50017283097131	3.76619446497729	0.0108273536970806	0.140840539654307	0.123191884856958	BMPR1B/ECM1/SULF2	3
GO:0048566	embryonic digestive tract development	3/263	33/18805	0.0909090909090909	6.50017283097131	3.76619446497729	0.0108273536970806	0.140840539654307	0.123191884856958	FGFR2/TNF/CXCL8	3
GO:0031032	actomyosin structure organization	8/263	215/18805	0.0372093023255814	2.66053585639756	2.91643633323406	0.0109714948785905	0.140840539654307	0.123191884856958	EVL/KRT19/PDLIM1/IQGAP2/TNNT1/LIMCH1/TACSTD2/PHLDB2	8
GO:0046777	protein autophosphorylation	7/263	173/18805	0.0404624277456647	2.89314050858261	2.97920830084817	0.0110614221536928	0.140840539654307	0.123191884856958	CDK12/NEK10/ATP13A2/FGFR1/PIM1/ERBB4/FGFR2	7
GO:0038065	collagen-activated signaling pathway	4/263	62/18805	0.0645161290322581	4.61302588004416	3.39368924188082	0.0110619633727107	0.140840539654307	0.123191884856958	ERBB2/FGFR1/ERBB4/FGFR2	4
GO:0046173	polyol biosynthetic process	4/263	62/18805	0.0645161290322581	4.61302588004416	3.39368924188082	0.0110619633727107	0.140840539654307	0.123191884856958	ASAH1/SPTSSB/QDPR/IMPA2	4
GO:0098773	skin epidermis development	6/263	133/18805	0.0451127819548872	3.2256496755196	3.06769313378613	0.0110877935008305	0.140840539654307	0.123191884856958	KLF4/SNAI1/SFN/FZD6/FGFR2/TNF	6
GO:0035791	platelet-derived growth factor receptor-beta signaling pathway	4/263	63/18805	0.0634920634920635	4.53980324702758	3.35170770988672	0.0116851906137113	0.140840539654307	0.123191884856958	ERBB2/FGFR1/ERBB4/FGFR2	4
GO:0015837	amine transport	5/263	97/18805	0.0515463917525773	3.68566500725177	3.15826621268673	0.0117007187467377	0.140840539654307	0.123191884856958	STXBP1/RGS2/TNF/SLC43A1/SNCG	5
GO:0002068	glandular epithelial cell development	2/263	12/18805	0.166666666666667	11.9169835234474	4.50526071380105	0.0117248792499018	0.140840539654307	0.123191884856958	PGR/FASN	2
GO:0006828	manganese ion transport	2/263	12/18805	0.166666666666667	11.9169835234474	4.50526071380105	0.0117248792499018	0.140840539654307	0.123191884856958	SLC39A8/ATP13A1	2
GO:0010518	positive regulation of phospholipase activity	2/263	12/18805	0.166666666666667	11.9169835234474	4.50526071380105	0.0117248792499018	0.140840539654307	0.123191884856958	FGFR1/FGFR2	2
GO:0030656	regulation of vitamin metabolic process	2/263	12/18805	0.166666666666667	11.9169835234474	4.50526071380105	0.0117248792499018	0.140840539654307	0.123191884856958	SNAI1/TNF	2
GO:0042117	monocyte activation	2/263	12/18805	0.166666666666667	11.9169835234474	4.50526071380105	0.0117248792499018	0.140840539654307	0.123191884856958	FN1/MT1G	2
GO:0045628	regulation of T-helper 2 cell differentiation	2/263	12/18805	0.166666666666667	11.9169835234474	4.50526071380105	0.0117248792499018	0.140840539654307	0.123191884856958	ANXA1/ASCL2	2
GO:0060442	branching involved in prostate gland morphogenesis	2/263	12/18805	0.166666666666667	11.9169835234474	4.50526071380105	0.0117248792499018	0.140840539654307	0.123191884856958	FRS2/FGFR2	2
GO:0097067	cellular response to thyroid hormone stimulus	2/263	12/18805	0.166666666666667	11.9169835234474	4.50526071380105	0.0117248792499018	0.140840539654307	0.123191884856958	MED1/CTSB	2
GO:2000659	regulation of interleukin-1-mediated signaling pathway	2/263	12/18805	0.166666666666667	11.9169835234474	4.50526071380105	0.0117248792499018	0.140840539654307	0.123191884856958	PYDC1/IL1R1	2
GO:0002363	alpha-beta T cell lineage commitment	3/263	34/18805	0.0882352941176471	6.30899127711921	3.69005188384415	0.0117545215189483	0.140840539654307	0.123191884856958	LGALS1/SOCS3/BATF	3
GO:0002828	regulation of type 2 immune response	3/263	34/18805	0.0882352941176471	6.30899127711921	3.69005188384415	0.0117545215189483	0.140840539654307	0.123191884856958	ECM1/ANXA1/ASCL2	3
GO:0007435	salivary gland morphogenesis	3/263	34/18805	0.0882352941176471	6.30899127711921	3.69005188384415	0.0117545215189483	0.140840539654307	0.123191884856958	FGFR1/FGFR2/TNF	3
GO:0010464	regulation of mesenchymal cell proliferation	3/263	34/18805	0.0882352941176471	6.30899127711921	3.69005188384415	0.0117545215189483	0.140840539654307	0.123191884856958	FGFR1/FGFR2/CHRD	3
GO:0060914	heart formation	3/263	34/18805	0.0882352941176471	6.30899127711921	3.69005188384415	0.0117545215189483	0.140840539654307	0.123191884856958	MESP1/PIM1/ROBO2	3
GO:1901889	negative regulation of cell junction assembly	3/263	34/18805	0.0882352941176471	6.30899127711921	3.69005188384415	0.0117545215189483	0.140840539654307	0.123191884856958	ROBO2/TNF/PHLDB2	3
GO:0050679	positive regulation of epithelial cell proliferation	8/263	218/18805	0.036697247706422	2.6239229776398	2.87219374026658	0.0118544294377109	0.141158430843462	0.12346994126648	MED1/ERBB2/HPN/EGFL7/ECM1/FGFR1/FGFR2/TNF	8
GO:0051960	regulation of nervous system development	13/263	454/18805	0.0286343612334802	2.04741126614295	2.69054343119635	0.0118667330329708	0.141158430843462	0.12346994126648	PCM1/TMEM98/SLITRK6/CXCR4/HES6/SPART/ROBO2/FN1/ASCL2/EFNA5/TNF/CDKN2B/CLSTN2	13
GO:0010631	epithelial cell migration	5/263	98/18805	0.0510204081632653	3.64805618064716	3.13013354364894	0.0121930077430653	0.143999858470968	0.125955311075317	EVL/SNAI1/SASH1/NANOS1/TACSTD2	5
GO:0071346	cellular response to type II interferon	5/263	98/18805	0.0510204081632653	3.64805618064716	3.13013354364894	0.0121930077430653	0.143999858470968	0.125955311075317	MED1/STXBP1/PIM1/HPX/TNF	5
GO:0050680	negative regulation of epithelial cell proliferation	7/263	177/18805	0.0395480225988701	2.82775880217396	2.90969260139792	0.012426546843022	0.146233828027705	0.127909343068399	MED1/HPN/SFN/OVOL1/FGFR2/TNF/CDKN2B	7
GO:0006979	response to oxidative stress	12/263	408/18805	0.0294117647058824	2.10299709237307	2.68259834360455	0.0126441956619196	0.147648397037464	0.129146653171017	GSTP1/NET1/PDLIM1/ATP13A2/SESN3/RBPMS/DHRS2/GPX8/S100A7/PXDNL/STC2/FADS2	12
GO:0098869	cellular oxidant detoxification	5/263	99/18805	0.0505050505050505	3.61120712831739	3.10236692805281	0.0126991668267273	0.147648397037464	0.129146653171017	GSTP1/GPX8/PXDNL/CP/S100A9	5
GO:0001893	maternal placenta development	3/263	35/18805	0.0857142857142857	6.12873438348724	3.61690249037647	0.0127259923394961	0.147648397037464	0.129146653171017	CTSB/STC1/STC2	3
GO:1903715	regulation of aerobic respiration	3/263	35/18805	0.0857142857142857	6.12873438348724	3.61690249037647	0.0127259923394961	0.147648397037464	0.129146653171017	DNAJC15/AK4/TNF	3
GO:0033674	positive regulation of kinase activity	8/263	223/18805	0.0358744394618834	2.56509062388106	2.8000797478644	0.0134407733793039	0.150061713984252	0.131257558625951	TRAF4/NEK10/LTF/ERBB2/FGFR1/SASH1/PIM1/TNF	8
GO:0050768	negative regulation of neurogenesis	6/263	139/18805	0.0431654676258993	3.08641299887846	2.94040231728192	0.0135598362348346	0.150061713984252	0.131257558625951	PCM1/TMEM98/SPART/ASCL2/TNF/CDKN2B	6
GO:0001885	endothelial cell development	4/263	66/18805	0.0606060606060606	4.33344855398087	3.23085320570354	0.0136886233936575	0.150061713984252	0.131257558625951	STC1/TNF/COL18A1/FASN	4
GO:0090303	positive regulation of wound healing	4/263	66/18805	0.0606060606060606	4.33344855398087	3.23085320570354	0.0136886233936575	0.150061713984252	0.131257558625951	PLAT/SMOC2/ANXA1/CXCR4	4
GO:1903317	regulation of protein maturation	4/263	66/18805	0.0606060606060606	4.33344855398087	3.23085320570354	0.0136886233936575	0.150061713984252	0.131257558625951	PRKACB/PLAT/TMEM98/HPN	4
GO:0001886	endothelial cell morphogenesis	2/263	13/18805	0.153846153846154	11.0002924831822	4.2955876352253	0.0137299077722832	0.150061713984252	0.131257558625951	STC1/COL18A1	2
GO:0003334	keratinocyte development	2/263	13/18805	0.153846153846154	11.0002924831822	4.2955876352253	0.0137299077722832	0.150061713984252	0.131257558625951	SFN/PALLD	2
GO:0007501	mesodermal cell fate specification	2/263	13/18805	0.153846153846154	11.0002924831822	4.2955876352253	0.0137299077722832	0.150061713984252	0.131257558625951	MESP1/FGFR1	2
GO:0040015	negative regulation of multicellular organism growth	2/263	13/18805	0.153846153846154	11.0002924831822	4.2955876352253	0.0137299077722832	0.150061713984252	0.131257558625951	GDF15/STC2	2
GO:0042362	fat-soluble vitamin biosynthetic process	2/263	13/18805	0.153846153846154	11.0002924831822	4.2955876352253	0.0137299077722832	0.150061713984252	0.131257558625951	SNAI1/TNF	2
GO:0051451	myoblast migration	2/263	13/18805	0.153846153846154	11.0002924831822	4.2955876352253	0.0137299077722832	0.150061713984252	0.131257558625951	NET1/ANXA1	2
GO:0060670	branching involved in labyrinthine layer morphogenesis	2/263	13/18805	0.153846153846154	11.0002924831822	4.2955876352253	0.0137299077722832	0.150061713984252	0.131257558625951	SOCS3/FGFR2	2
GO:0070561	vitamin D receptor signaling pathway	2/263	13/18805	0.153846153846154	11.0002924831822	4.2955876352253	0.0137299077722832	0.150061713984252	0.131257558625951	MED1/PIM1	2
GO:0030224	monocyte differentiation	3/263	36/18805	0.0833333333333333	5.9584917617237	3.54654101201548	0.0137420679131742	0.150061713984252	0.131257558625951	MED1/MT1G/FASN	3
GO:0043369	CD4-positive or CD8-positive, alpha-beta T cell lineage commitment	3/263	36/18805	0.0833333333333333	5.9584917617237	3.54654101201548	0.0137420679131742	0.150061713984252	0.131257558625951	LGALS1/SOCS3/BATF	3
GO:1902624	positive regulation of neutrophil migration	3/263	36/18805	0.0833333333333333	5.9584917617237	3.54654101201548	0.0137420679131742	0.150061713984252	0.131257558625951	CD99/IL1R1/CXCL8	3
GO:0010596	negative regulation of endothelial cell migration	5/263	101/18805	0.0495049504950495	3.53969807627151	3.04789665374406	0.0137537595214701	0.150061713984252	0.131257558625951	KLF4/GADD45A/JUP/STC1/TNF	5
GO:0090132	epithelium migration	5/263	101/18805	0.0495049504950495	3.53969807627151	3.04789665374406	0.0137537595214701	0.150061713984252	0.131257558625951	EVL/SNAI1/SASH1/NANOS1/TACSTD2	5
GO:0043491	phosphatidylinositol 3-kinase/protein kinase B signal transduction	10/263	316/18805	0.0316455696202532	2.26271839052799	2.69598854690325	0.0138283971547734	0.150233068843505	0.131407441096882	ERBB2/GDF15/SESN3/FGFR1/ERBB4/FN1/PIK3C2G/TSPYL5/MEIS3/TNF	10
GO:1903034	regulation of response to wounding	7/263	181/18805	0.0386740331491713	2.7652668949436	2.84209041395213	0.0139091939737014	0.150233068843505	0.131407441096882	KLF4/PLAT/SMOC2/ANXA1/CXCR4/TNF/PHLDB2	7
GO:0043410	positive regulation of MAPK cascade	13/263	464/18805	0.0280172413793103	2.00328602333814	2.60613527230371	0.0140004088309014	0.150233068843505	0.131407441096882	TRAF4/GADD45A/FRS2/NEK10/ERBB2/GDF15/FGFR1/SASH1/ERBB4/FGFR2/TNF/S100A7/BCAR3	13
GO:0002286	T cell activation involved in immune response	6/263	140/18805	0.0428571428571429	3.06436719174362	2.91985763069649	0.0140063766118787	0.150233068843505	0.131407441096882	LGALS1/TMEM98/SOCS3/ANXA1/ASCL2/BATF	6
GO:0061041	regulation of wound healing	6/263	140/18805	0.0428571428571429	3.06436719174362	2.91985763069649	0.0140063766118787	0.150233068843505	0.131407441096882	PLAT/SMOC2/ANXA1/CXCR4/TNF/PHLDB2	6
GO:0001934	positive regulation of protein phosphorylation	12/263	414/18805	0.0289855072463768	2.07251887364303	2.62801081972371	0.0140430304108648	0.150233068843505	0.131407441096882	TRAF4/GFRA1/NEK10/LTF/ERBB2/FGFR1/LIMCH1/SASH1/PIM1/ERBB4/EFNA5/TNF	12
GO:0042446	hormone biosynthetic process	4/263	67/18805	0.0597014925373134	4.26877021735429	3.19216170693194	0.0144018624070085	0.1530778601003	0.133895753040371	STARD3/MED1/STC2/NR3C1	4
GO:2000630	positive regulation of miRNA metabolic process	4/263	67/18805	0.0597014925373134	4.26877021735429	3.19216170693194	0.0144018624070085	0.1530778601003	0.133895753040371	KLF4/XIST/TNF/NR3C1	4
GO:0141193	nuclear receptor-mediated signaling pathway	7/263	183/18805	0.0382513661202186	2.73504539882399	2.80897538674377	0.0146961918080442	0.155704025747606	0.136192835235827	MED1/PGR/PIM1/PRCP/LBH/NR3C1/SCGB2A2	7
GO:0003382	epithelial cell morphogenesis	3/263	37/18805	0.0810810810810811	5.79745144383928	3.47878156216428	0.014803009360046	0.155833596937226	0.136306169927042	PALLD/STC1/COL18A1	3
GO:2000515	negative regulation of CD4-positive, alpha-beta T cell activation	3/263	37/18805	0.0810810810810811	5.79745144383928	3.47878156216428	0.014803009360046	0.155833596937226	0.136306169927042	LGALS1/ANXA1/ASCL2	3
GO:0046620	regulation of organ growth	5/263	103/18805	0.0485436893203883	3.47096607479051	2.99478794262463	0.0148657956436224	0.155996167661579	0.136448368998452	FGFR1/PIM1/ERBB4/RGS2/FGFR2	5
GO:0006575	modified amino acid metabolic process	7/263	184/18805	0.0380434782608696	2.72018102165647	2.79258416112054	0.0151013851001729	0.157351465867248	0.137633835490624	GSTP1/MED1/MBOAT2/CTSB/HPN/PLOD2/CTSK	7
GO:0035019	somatic stem cell population maintenance	4/263	68/18805	0.0588235294117647	4.20599418474614	3.15421915903106	0.0151382138634044	0.157351465867248	0.137633835490624	KLF4/KLF10/ASCL2/LBH	4
GO:0060760	positive regulation of response to cytokine stimulus	4/263	68/18805	0.0588235294117647	4.20599418474614	3.15421915903106	0.0151382138634044	0.157351465867248	0.137633835490624	MED1/IL1R1/CXCR4/HPX	4
GO:0072672	neutrophil extravasation	2/263	14/18805	0.142857142857143	10.2145573058121	4.10760102899452	0.0158718537516327	0.161855306732609	0.141573302398813	CD99/IL1R1	2
GO:1900025	negative regulation of substrate adhesion-dependent cell spreading	2/263	14/18805	0.142857142857143	10.2145573058121	4.10760102899452	0.0158718537516327	0.161855306732609	0.141573302398813	EFNA5/TACSTD2	2
GO:2001198	regulation of dendritic cell differentiation	2/263	14/18805	0.142857142857143	10.2145573058121	4.10760102899452	0.0158718537516327	0.161855306732609	0.141573302398813	TMEM176A/TMEM176B	2
GO:0007431	salivary gland development	3/263	38/18805	0.0789473684210526	5.6448869321593	3.41345533993433	0.0159090385572389	0.161855306732609	0.141573302398813	FGFR1/FGFR2/TNF	3
GO:0043506	regulation of JUN kinase activity	3/263	38/18805	0.0789473684210526	5.6448869321593	3.41345533993433	0.0159090385572389	0.161855306732609	0.141573302398813	GSTP1/SASH1/TNF	3
GO:0071711	basement membrane organization	3/263	38/18805	0.0789473684210526	5.6448869321593	3.41345533993433	0.0159090385572389	0.161855306732609	0.141573302398813	HPN/RAMP2/PHLDB2	3
GO:0071674	mononuclear cell migration	8/263	230/18805	0.0347826086956522	2.48702264837163	2.70235124631266	0.0159153624829637	0.161855306732609	0.141573302398813	CD99/ECM1/ANXA1/CXCR4/MTUS1/ASCL2/TNF/S100A7	8
GO:0050767	regulation of neurogenesis	11/263	372/18805	0.0295698924731183	2.11430352835357	2.58524478782943	0.0160094293512564	0.16231098373043	0.141971878748956	PCM1/TMEM98/CXCR4/HES6/SPART/ROBO2/FN1/ASCL2/EFNA5/TNF/CDKN2B	11
GO:0030217	T cell differentiation	10/263	324/18805	0.0308641975308642	2.20684880063841	2.60968050865708	0.0161950356605887	0.163689087428342	0.143177292988995	LGALS1/TMEM98/ERBB2/MAFB/SOCS1/SOCS3/ANXA1/ASCL2/RHOH/BATF	10
GO:0048008	platelet-derived growth factor receptor signaling pathway	5/263	106/18805	0.0471698113207547	3.37273118588134	2.91754113110967	0.0166442767771419	0.167203938965496	0.146251700307492	PLAT/ERBB2/FGFR1/ERBB4/FGFR2	5
GO:0090130	tissue migration	5/263	106/18805	0.0471698113207547	3.37273118588134	2.91754113110967	0.0166442767771419	0.167203938965496	0.146251700307492	EVL/SNAI1/SASH1/NANOS1/TACSTD2	5
GO:0032350	regulation of hormone metabolic process	3/263	39/18805	0.0769230769230769	5.50014624159111	3.35040865544376	0.017060339495341	0.169830267785947	0.148548925228951	HPN/STC2/NR3C1	3
GO:0050974	detection of mechanical stimulus involved in sensory perception	3/263	39/18805	0.0769230769230769	5.50014624159111	3.35040865544376	0.017060339495341	0.169830267785947	0.148548925228951	HPN/CXCR4/TNF	3
GO:2000316	regulation of T-helper 17 type immune response	3/263	39/18805	0.0769230769230769	5.50014624159111	3.35040865544376	0.017060339495341	0.169830267785947	0.148548925228951	LGALS1/ASCL2/BATF	3
GO:0001959	regulation of cytokine-mediated signaling pathway	7/263	189/18805	0.037037037037037	2.64821856076609	2.71223442878319	0.0172473800084882	0.171175051590267	0.14972519487394	GSTP1/MED1/PYDC1/IL1R1/ECM1/CXCR4/HPX	7
GO:0003158	endothelium development	6/263	147/18805	0.0408163265306122	2.91844494451773	2.78099475948191	0.0174226795794032	0.171818394685658	0.150287920980539	MESP1/CXCR4/STC1/TNF/COL18A1/FASN	6
GO:0051897	positive regulation of phosphatidylinositol 3-kinase/protein kinase B signal transduction	7/263	190/18805	0.0368421052631579	2.63428	2.69647627995947	0.0177011148503283	0.171818394685658	0.150287920980539	GDF15/FGFR1/ERBB4/FN1/TSPYL5/MEIS3/TNF	7
GO:0019751	polyol metabolic process	5/263	108/18805	0.0462962962962963	3.31027320095761	2.86756955747234	0.017905279022592	0.171818394685658	0.150287920980539	ASAH1/DEGS2/SPTSSB/QDPR/IMPA2	5
GO:0002829	negative regulation of type 2 immune response	2/263	15/18805	0.133333333333333	9.53358681875792	3.9376631181451	0.0181465254478328	0.171818394685658	0.150287920980539	ANXA1/ASCL2	2
GO:0010454	negative regulation of cell fate commitment	2/263	15/18805	0.133333333333333	9.53358681875792	3.9376631181451	0.0181465254478328	0.171818394685658	0.150287920980539	LGALS1/MESP1	2
GO:0046512	sphingosine biosynthetic process	2/263	15/18805	0.133333333333333	9.53358681875792	3.9376631181451	0.0181465254478328	0.171818394685658	0.150287920980539	ASAH1/SPTSSB	2
GO:0046520	sphingoid biosynthetic process	2/263	15/18805	0.133333333333333	9.53358681875792	3.9376631181451	0.0181465254478328	0.171818394685658	0.150287920980539	ASAH1/SPTSSB	2
GO:0046598	positive regulation of viral entry into host cell	2/263	15/18805	0.133333333333333	9.53358681875792	3.9376631181451	0.0181465254478328	0.171818394685658	0.150287920980539	LGALS1/TMPRSS2	2
GO:0048791	calcium ion-regulated exocytosis of neurotransmitter	2/263	15/18805	0.133333333333333	9.53358681875792	3.9376631181451	0.0181465254478328	0.171818394685658	0.150287920980539	STXBP1/RIMS2	2
GO:0050966	detection of mechanical stimulus involved in sensory perception of pain	2/263	15/18805	0.133333333333333	9.53358681875792	3.9376631181451	0.0181465254478328	0.171818394685658	0.150287920980539	CXCR4/TNF	2
GO:0055057	neuroblast division	2/263	15/18805	0.133333333333333	9.53358681875792	3.9376631181451	0.0181465254478328	0.171818394685658	0.150287920980539	FGFR1/FGFR2	2
GO:0060330	regulation of response to type II interferon	2/263	15/18805	0.133333333333333	9.53358681875792	3.9376631181451	0.0181465254478328	0.171818394685658	0.150287920980539	MED1/HPX	2
GO:0060334	regulation of type II interferon-mediated signaling pathway	2/263	15/18805	0.133333333333333	9.53358681875792	3.9376631181451	0.0181465254478328	0.171818394685658	0.150287920980539	MED1/HPX	2
GO:0075294	positive regulation by symbiont of entry into host	2/263	15/18805	0.133333333333333	9.53358681875792	3.9376631181451	0.0181465254478328	0.171818394685658	0.150287920980539	LGALS1/TMPRSS2	2
GO:2000320	negative regulation of T-helper 17 cell differentiation	2/263	15/18805	0.133333333333333	9.53358681875792	3.9376631181451	0.0181465254478328	0.171818394685658	0.150287920980539	LGALS1/ASCL2	2
GO:2001028	positive regulation of endothelial cell chemotaxis	2/263	15/18805	0.133333333333333	9.53358681875792	3.9376631181451	0.0181465254478328	0.171818394685658	0.150287920980539	SMOC2/FGFR1	2
GO:0046626	regulation of insulin receptor signaling pathway	4/263	72/18805	0.0555555555555556	3.97232784114913	3.00942828315607	0.0183190945838574	0.172955348578253	0.151282403771985	GRB14/SESN3/SOCS1/SOCS3	4
GO:0097530	granulocyte migration	6/263	149/18805	0.0402684563758389	2.8792711868732	2.74282456235003	0.0184952696357251	0.174119752713469	0.152300897030422	CD99/IL1R1/ANXA1/S100A7/CXCL8/S100A9	6
GO:0045580	regulation of T cell differentiation	7/263	192/18805	0.0364583333333333	2.60684014575412	2.66526138116161	0.018633714516764	0.1749233314323	0.153003779717798	LGALS1/ERBB2/SOCS1/ANXA1/ASCL2/RHOH/BATF	7
GO:0060560	developmental growth involved in morphogenesis	8/263	238/18805	0.0336134453781513	2.40342524842637	2.59496558446598	0.0191294321177164	0.178977187659442	0.156549649328824	MED1/MESP1/CXCR4/SPART/FN1/FGFR2/EFNA5/RIMS2	8
GO:0045670	regulation of osteoclast differentiation	4/263	73/18805	0.0547945205479452	3.91791239127038	2.97485848439653	0.0191741873274	0.178977187659442	0.156549649328824	KLF10/LTF/MAFB/TNF	4
GO:0040036	regulation of fibroblast growth factor receptor signaling pathway	3/263	41/18805	0.0731707317073171	5.23184642492813	3.23060471054059	0.0194993110230066	0.181497824352561	0.158754426348474	SMOC2/CREB3L1/SULF2	3
GO:0051336	regulation of hydrolase activity	10/263	334/18805	0.029940119760479	2.14077548325402	2.50526064089798	0.0195613735678906	0.181562608186478	0.158811092153846	NET1/ATP13A2/ECM1/FGFR1/TIMP3/RGS2/FGFR2/EFNA5/CSTA/BCAR3	10
GO:0090596	sensory organ morphogenesis	9/263	286/18805	0.0314685314685315	2.25005982610545	2.53705426293203	0.0196472786946574	0.181847705895776	0.159060464417422	GNGT1/FRS2/SLITRK6/HPN/MAFB/FGFR1/FZD6/FGFR2/BCAR3	9
GO:0002526	acute inflammatory response	5/263	111/18805	0.045045045045045	3.22080635768849	2.79476804802917	0.0199126059256423	0.183380730210091	0.16040138625197	GSTP1/FN1/TNF/PRCP/OSMR	5
GO:0008202	steroid metabolic process	10/263	335/18805	0.0298507462686567	2.13438510867715	2.49502085292727	0.0199242189424014	0.183380730210091	0.16040138625197	STARD3/MED1/ASAH1/SNAI1/FGFR1/EPHX2/DHRS2/TNF/NR3C1/SERPINA6	10
GO:0030858	positive regulation of epithelial cell differentiation	4/263	74/18805	0.0540540540540541	3.86496762922618	2.94089693258812	0.0200535971702636	0.18405738906969	0.160993253341685	MED1/SFN/MESP1/CDKN2B	4
GO:0002687	positive regulation of leukocyte migration	6/263	152/18805	0.0394736842105263	2.82244346607965	2.68674358720552	0.0201875619830014	0.184772268705527	0.161618551782041	CD99/IL1R1/ASCL2/TNF/S100A7/CXCL8	6
GO:0042327	positive regulation of phosphorylation	12/263	437/18805	0.0274599542334096	1.96343893292497	2.42693800483125	0.0205210489703722	0.185027452784864	0.161841758877073	TRAF4/GFRA1/NEK10/LTF/ERBB2/FGFR1/LIMCH1/SASH1/PIM1/ERBB4/EFNA5/TNF	12
GO:0010273	detoxification of copper ion	2/263	16/18805	0.125	8.93773764258555	3.78294132969491	0.0205498208096643	0.185027452784864	0.161841758877073	MT1E/MT1G	2
GO:1902222	erythrose 4-phosphate/phosphoenolpyruvate family amino acid catabolic process	2/263	16/18805	0.125	8.93773764258555	3.78294132969491	0.0205498208096643	0.185027452784864	0.161841758877073	QDPR/KYNU	2
GO:1990169	stress response to copper ion	2/263	16/18805	0.125	8.93773764258555	3.78294132969491	0.0205498208096643	0.185027452784864	0.161841758877073	MT1E/MT1G	2
GO:2000317	negative regulation of T-helper 17 type immune response	2/263	16/18805	0.125	8.93773764258555	3.78294132969491	0.0205498208096643	0.185027452784864	0.161841758877073	LGALS1/ASCL2	2
GO:0014013	regulation of gliogenesis	5/263	112/18805	0.0446428571428571	3.19204915806627	2.77105090982665	0.0206131309373746	0.185027452784864	0.161841758877073	TMEM98/CXCR4/ASCL2/TNF/CDKN2B	5
GO:0019218	regulation of steroid metabolic process	5/263	112/18805	0.0446428571428571	3.19204915806627	2.77105090982665	0.0206131309373746	0.185027452784864	0.161841758877073	ASAH1/SNAI1/EPHX2/TNF/NR3C1	5
GO:0060562	epithelial tube morphogenesis	10/263	337/18805	0.029673590504451	2.12171813473841	2.47464818927561	0.0206646745447132	0.185027452784864	0.161841758877073	PRKACB/MED1/PGR/MESP1/CXCR4/FZD6/FGFR2/TACSTD2/TNF/NR3C1	10
GO:0002360	T cell lineage commitment	3/263	42/18805	0.0714285714285714	5.10727865290603	3.17360141452195	0.0207871718929762	0.185118192938802	0.161921128429499	LGALS1/SOCS3/BATF	3
GO:0060251	regulation of glial cell proliferation	3/263	42/18805	0.0714285714285714	5.10727865290603	3.17360141452195	0.0207871718929762	0.185118192938802	0.161921128429499	ASCL2/TNF/CDKN2B	3
GO:0045109	intermediate filament organization	4/263	75/18805	0.0533333333333333	3.81343472750317	2.90752390436491	0.0209574914734381	0.185631544099404	0.162370151823071	KRT19/KRT15/KRT23/NEFH	4
GO:0071479	cellular response to ionizing radiation	4/263	75/18805	0.0533333333333333	3.81343472750317	2.90752390436491	0.0209574914734381	0.185631544099404	0.162370151823071	NET1/GADD45A/TSPYL5/TNF	4
GO:0018108	peptidyl-tyrosine phosphorylation	7/263	198/18805	0.0353535353535354	2.52784498982218	2.5739399927898	0.0216377215703558	0.191122987870129	0.167173465630034	GFRA1/ERBB2/SOCS1/FGFR1/ERBB4/FGFR2/EFNA5	7
GO:0061448	connective tissue development	9/263	291/18805	0.0309278350515464	2.21139900435106	2.48032325022228	0.0216934741922393	0.191122987870129	0.167173465630034	BMPR1B/MBOAT2/SNAI1/ECM1/FGFR1/SULF2/CTSK/SPART/STC1	9
GO:0072678	T cell migration	4/263	76/18805	0.0526315789473684	3.76325795477286	2.87472057532509	0.0218860281166317	0.192305233718137	0.168207564865509	CD99/ECM1/ASCL2/S100A7	4
GO:1903038	negative regulation of leukocyte cell-cell adhesion	6/263	155/18805	0.0387096774193548	2.76781552802649	2.63201331784366	0.0219822008338013	0.192313442418926	0.16821474493827	KLF4/LGALS1/ERBB2/SOCS1/ANXA1/ASCL2	6
GO:0030038	contractile actin filament bundle assembly	5/263	114/18805	0.043859649122807	3.13604829564405	2.72440665100179	0.0220620580377402	0.192313442418926	0.16821474493827	EVL/PDLIM1/LIMCH1/TACSTD2/PHLDB2	5
GO:0043149	stress fiber assembly	5/263	114/18805	0.043859649122807	3.13604829564405	2.72440665100179	0.0220620580377402	0.192313442418926	0.16821474493827	EVL/PDLIM1/LIMCH1/TACSTD2/PHLDB2	5
GO:0018212	peptidyl-tyrosine modification	7/263	199/18805	0.0351758793969849	2.51514225117985	2.55904631529809	0.0221691950869692	0.192737461244231	0.168585630185034	GFRA1/ERBB2/SOCS1/FGFR1/ERBB4/FGFR2/EFNA5	7
GO:0060485	mesenchyme development	10/263	342/18805	0.0292397660818713	2.0906988637627	2.42432860614991	0.0226035884777765	0.195996905353352	0.171436635047513	SNAI1/LDLRAD4/HPN/MESP1/FGFR1/ERBB4/ROBO2/FN1/FGFR2/PHLDB2	10
GO:0002923	regulation of humoral immune response mediated by circulating immunoglobulin	2/263	17/18805	0.117647058823529	8.41198836949228	3.64119234678572	0.0230777258016781	0.198023714886795	0.173209466132113	HPX/TNF	2
GO:0031645	negative regulation of nervous system process	2/263	17/18805	0.117647058823529	8.41198836949228	3.64119234678572	0.0230777258016781	0.198023714886795	0.173209466132113	TMEM98/TNF	2
GO:0060253	negative regulation of glial cell proliferation	2/263	17/18805	0.117647058823529	8.41198836949228	3.64119234678572	0.0230777258016781	0.198023714886795	0.173209466132113	ASCL2/CDKN2B	2
GO:0060644	mammary gland epithelial cell differentiation	2/263	17/18805	0.117647058823529	8.41198836949228	3.64119234678572	0.0230777258016781	0.198023714886795	0.173209466132113	ERBB4/LBH	2
GO:0046631	alpha-beta T cell activation	7/263	201/18805	0.0348258706467662	2.49011596012334	2.52952884835408	0.0232591559539456	0.199062126930521	0.174117755302537	LGALS1/TMEM98/SOCS1/SOCS3/ANXA1/ASCL2/BATF	7
GO:0019058	viral life cycle	9/263	295/18805	0.0305084745762712	2.18141393310563	2.43576056066954	0.0234374810317329	0.199567209458195	0.174559546201274	LGALS1/STOM/LTF/CTSB/MX1/CXCR4/TMPRSS2/TNF/CXCL8	9
GO:0046627	negative regulation of insulin receptor signaling pathway	3/263	44/18805	0.0681818181818182	4.87512962322848	3.06485045012488	0.0234998717055477	0.199567209458195	0.174559546201274	GRB14/SOCS1/SOCS3	3
GO:0071364	cellular response to epidermal growth factor stimulus	3/263	44/18805	0.0681818181818182	4.87512962322848	3.06485045012488	0.0234998717055477	0.199567209458195	0.174559546201274	MED1/ERBB2/ERBB4	3
GO:0002062	chondrocyte differentiation	5/263	116/18805	0.0431034482758621	3.08197849744329	2.67877914734861	0.0235756107869916	0.199695726331972	0.174671958692418	BMPR1B/MBOAT2/ECM1/FGFR1/SULF2	5
GO:0032890	regulation of organic acid transport	4/263	78/18805	0.0512820512820513	3.66676416106074	2.81075190185367	0.0238176127786506	0.200713642213948	0.175562320064464	STXBP1/RGS2/TNF/SLC43A1	4
GO:0046425	regulation of receptor signaling pathway via JAK-STAT	4/263	78/18805	0.0512820512820513	3.66676416106074	2.81075190185367	0.0238176127786506	0.200713642213948	0.175562320064464	GADD45A/SOCS1/SOCS3/ERBB4	4
GO:0042552	myelination	6/263	158/18805	0.0379746835443038	2.71526206863359	2.57857191952597	0.0238816098329511	0.200739552039729	0.175584983143448	PMP22/TMEM98/ERBB2/CXCR4/TNF/GJC3	6
GO:0120178	steroid hormone biosynthetic process	3/263	45/18805	0.0666666666666667	4.76679340937896	3.01291131824823	0.0249247076640975	0.208232393205296	0.182138900278284	STARD3/MED1/NR3C1	3
GO:1900077	negative regulation of cellular response to insulin stimulus	3/263	45/18805	0.0666666666666667	4.76679340937896	3.01291131824823	0.0249247076640975	0.208232393205296	0.182138900278284	GRB14/SOCS1/SOCS3	3
GO:0002822	regulation of adaptive immune response based on somatic recombination of immune receptors built from immunoglobulin superfamily domains	7/263	204/18805	0.0343137254901961	2.45349660776858	2.48591152045939	0.0249626085936546	0.208232393205296	0.182138900278284	LGALS1/IL1R1/ANXA1/ASCL2/HPX/TNF/BATF	7
GO:0042060	wound healing	12/263	450/18805	0.0266666666666667	1.90671736375158	2.31859930956513	0.0250493624629754	0.208428407362384	0.182310352003261	PLAT/FKBP10/SMOC2/ERBB2/STXBP1/ANXA1/CXCR4/FZD6/FN1/TNF/PRCP/PHLDB2	12
GO:0007272	ensheathment of neurons	6/263	160/18805	0.0375	2.68132129277567	2.54363163512965	0.0252072252177702	0.208687957518977	0.182537378064678	PMP22/TMEM98/ERBB2/CXCR4/TNF/GJC3	6
GO:0008366	axon ensheathment	6/263	160/18805	0.0375	2.68132129277567	2.54363163512965	0.0252072252177702	0.208687957518977	0.182537378064678	PMP22/TMEM98/ERBB2/CXCR4/TNF/GJC3	6
GO:0048738	cardiac muscle tissue development	8/263	251/18805	0.0318725099601594	2.27894505627679	2.4293756783821	0.0253017466839704	0.208945502064367	0.18276264983699	MED1/FRS2/MESP1/FGFR1/PIM1/ERBB4/RGS2/FGFR2	8
GO:0003128	heart field specification	2/263	18/18805	0.111111111111111	7.94465568229827	3.51061302802302	0.0257263127600414	0.210305825649546	0.183952511980978	MESP1/ROBO2	2
GO:0010633	negative regulation of epithelial cell migration	2/263	18/18805	0.111111111111111	7.94465568229827	3.51061302802302	0.0257263127600414	0.210305825649546	0.183952511980978	EVL/TACSTD2	2
GO:0010755	regulation of plasminogen activation	2/263	18/18805	0.111111111111111	7.94465568229827	3.51061302802302	0.0257263127600414	0.210305825649546	0.183952511980978	PLAT/HPN	2
GO:0048368	lateral mesoderm development	2/263	18/18805	0.111111111111111	7.94465568229827	3.51061302802302	0.0257263127600414	0.210305825649546	0.183952511980978	MESP1/FGFR1	2
GO:0045444	fat cell differentiation	8/263	252/18805	0.0317460317460317	2.26990162351379	2.41706307429514	0.025827950348686	0.210305825649546	0.183952511980978	ADIRF/KLF4/MED1/MAFB/SOCS1/PIM1/RGS2/TNF	8
GO:0045069	regulation of viral genome replication	4/263	80/18805	0.05	3.57509505703422	2.7488563982615	0.025849426217926	0.210305825649546	0.183952511980978	LTF/MX1/TNF/CXCL8	4
GO:0030518	nuclear receptor-mediated steroid hormone signaling pathway	5/263	119/18805	0.0420168067226891	3.00428156053296	2.61215381518918	0.0259690597107153	0.210758748144845	0.184348678993877	MED1/PGR/LBH/NR3C1/SCGB2A2	5
GO:0010463	mesenchymal cell proliferation	3/263	46/18805	0.0652173913043478	4.66316746569681	2.96248087023824	0.0263951493950102	0.21212687135746	0.185545363398043	FGFR1/FGFR2/CHRD	3
GO:0014014	negative regulation of gliogenesis	3/263	46/18805	0.0652173913043478	4.66316746569681	2.96248087023824	0.0263951493950102	0.21212687135746	0.185545363398043	TMEM98/ASCL2/CDKN2B	3
GO:0021762	substantia nigra development	3/263	46/18805	0.0652173913043478	4.66316746569681	2.96248087023824	0.0263951493950102	0.21212687135746	0.185545363398043	GNB4/S100A1/NDRG2	3
GO:2001239	regulation of extrinsic apoptotic signaling pathway in absence of ligand	3/263	46/18805	0.0652173913043478	4.66316746569681	2.96248087023824	0.0263951493950102	0.21212687135746	0.185545363398043	KLF4/FGFR1/TNF	3
GO:1903036	positive regulation of response to wounding	4/263	81/18805	0.0493827160493827	3.53095808102145	2.71864719935806	0.026903214006611	0.215683917644242	0.188656678064031	PLAT/SMOC2/ANXA1/CXCR4	4
GO:0030099	myeloid cell differentiation	12/263	455/18805	0.0263736263736264	1.88576442568838	2.27787876084102	0.0269730508010994	0.21571893783889	0.188687309896296	MED1/KLF10/LTF/MAFB/SOCS1/DHRS2/MT1G/TNF/BATF/CDKN2B/NR3C1/FASN	12
GO:0043537	negative regulation of blood vessel endothelial cell migration	4/263	82/18805	0.0487804878048781	3.48789761661875	2.68891094387941	0.0279823949241251	0.223249373547196	0.195274110621268	KLF4/GADD45A/JUP/TNF	4
GO:0001503	ossification	12/263	458/18805	0.0262008733624454	1.87341225696116	2.25369010513073	0.0281778192463835	0.224265493760468	0.196162901338922	BMPR1B/KLF10/SNAI1/LTF/ECM1/CREB3L1/CTSK/FGFR2/STC1/TNF/CHRD/FASN	12
GO:0002693	positive regulation of cellular extravasation	2/263	19/18805	0.105263157894737	7.52651590954573	3.38973501581627	0.0284917387768788	0.225673748244749	0.197394688185967	CD99/IL1R1	2
GO:0020027	hemoglobin metabolic process	2/263	19/18805	0.105263157894737	7.52651590954573	3.38973501581627	0.0284917387768788	0.225673748244749	0.197394688185967	KLF4/HPX	2
GO:0045861	negative regulation of proteolysis	6/263	165/18805	0.0363636363636364	2.60006913238852	2.45856940220522	0.028733615482302	0.225960054926456	0.197645117926248	PLAT/TMEM98/ECM1/TIMP3/RPL23/CSTA	6
GO:0120254	olefinic compound metabolic process	6/263	165/18805	0.0363636363636364	2.60006913238852	2.45856940220522	0.028733615482302	0.225960054926456	0.197645117926248	GSTP1/STARD3/EPHX2/FADS1/CYP2J2/FADS2	6
GO:2001236	regulation of extrinsic apoptotic signaling pathway	6/263	165/18805	0.0363636363636364	2.60006913238852	2.45856940220522	0.028733615482302	0.225960054926456	0.197645117926248	BMPR1B/GSTP1/KLF4/FGFR1/TNFSF10/TNF	6
GO:0019233	sensory perception of pain	4/263	83/18805	0.0481927710843374	3.44587475376792	2.65963382210212	0.0290870619043574	0.22742850938732	0.198929561122109	NPY1R/CXCR4/TNF/LXN	4
GO:0044703	multi-organism reproductive process	7/263	211/18805	0.033175355450237	2.37210098570991	2.38707243530792	0.0292657550359927	0.22742850938732	0.198929561122109	MED1/PGR/CTSB/KLK14/RGS2/STC1/STC2	7
GO:0071383	cellular response to steroid hormone stimulus	7/263	211/18805	0.033175355450237	2.37210098570991	2.38707243530792	0.0292657550359927	0.22742850938732	0.198929561122109	MED1/PGR/ANXA1/STC1/LBH/NR3C1/SCGB2A2	7
GO:0046634	regulation of alpha-beta T cell activation	5/263	123/18805	0.040650406504065	2.90658134718229	2.52650940248445	0.0293943991677423	0.22742850938732	0.198929561122109	LGALS1/SOCS1/ANXA1/ASCL2/BATF	5
GO:0002673	regulation of acute inflammatory response	3/263	48/18805	0.0625	4.46886882129278	2.86583718518232	0.0294725261026967	0.22742850938732	0.198929561122109	GSTP1/TNF/OSMR	3
GO:0008038	neuron recognition	3/263	48/18805	0.0625	4.46886882129278	2.86583718518232	0.0294725261026967	0.22742850938732	0.198929561122109	CXCR4/PALLD/ROBO2	3
GO:0042119	neutrophil activation	3/263	48/18805	0.0625	4.46886882129278	2.86583718518232	0.0294725261026967	0.22742850938732	0.198929561122109	ANXA1/TNF/CXCL8	3
GO:1902622	regulation of neutrophil migration	3/263	48/18805	0.0625	4.46886882129278	2.86583718518232	0.0294725261026967	0.22742850938732	0.198929561122109	CD99/IL1R1/CXCL8	3
GO:0021872	forebrain generation of neurons	4/263	84/18805	0.0476190476190476	3.40485243527069	2.63080259278455	0.0302172988687912	0.232630840590343	0.203479990906912	FGFR1/ERBB4/ROBO2/FGFR2	4
GO:0019079	viral genome replication	5/263	124/18805	0.0403225806451613	2.8831411750276	2.50563824231564	0.0302931461602563	0.232671134261176	0.203515235398802	STOM/LTF/MX1/TNF/CXCL8	5
GO:0006509	membrane protein ectodomain proteolysis	3/263	49/18805	0.0612244897959184	4.3776674167766	2.81948325402498	0.0310792322496014	0.236015138716142	0.206440204394152	TIMP3/BACE2/TNF	3
GO:0006775	fat-soluble vitamin metabolic process	3/263	49/18805	0.0612244897959184	4.3776674167766	2.81948325402498	0.0310792322496014	0.236015138716142	0.206440204394152	SNAI1/FGFR1/TNF	3
GO:0010453	regulation of cell fate commitment	3/263	49/18805	0.0612244897959184	4.3776674167766	2.81948325402498	0.0310792322496014	0.236015138716142	0.206440204394152	LGALS1/MESP1/FGFR1	3
GO:0070849	response to epidermal growth factor	3/263	49/18805	0.0612244897959184	4.3776674167766	2.81948325402498	0.0310792322496014	0.236015138716142	0.206440204394152	MED1/ERBB2/ERBB4	3
GO:0043011	myeloid dendritic cell differentiation	2/263	20/18805	0.1	7.15019011406844	3.27734865966138	0.031370244112638	0.236015138716142	0.206440204394152	DHRS2/BATF	2
GO:0060602	branch elongation of an epithelium	2/263	20/18805	0.1	7.15019011406844	3.27734865966138	0.031370244112638	0.236015138716142	0.206440204394152	MED1/FGFR2	2
GO:0097254	renal tubular secretion	2/263	20/18805	0.1	7.15019011406844	3.27734865966138	0.031370244112638	0.236015138716142	0.206440204394152	MLLT6/STC1	2
GO:0014855	striated muscle cell proliferation	4/263	85/18805	0.0470588235294118	3.36479534779691	2.60240455323677	0.0313731808065766	0.236015138716142	0.206440204394152	FGFR1/PIM1/ERBB4/FGFR2	4
GO:0046928	regulation of neurotransmitter secretion	4/263	85/18805	0.0470588235294118	3.36479534779691	2.60240455323677	0.0313731808065766	0.236015138716142	0.206440204394152	FBXL20/STXBP1/RIMS2/SNCG	4
GO:0001649	osteoblast differentiation	8/263	262/18805	0.0305343511450382	2.18326415696746	2.29703209229343	0.0315154760246374	0.236545543282871	0.206904144240396	BMPR1B/SNAI1/LTF/CREB3L1/FGFR2/TNF/CHRD/FASN	8
GO:0006694	steroid biosynthetic process	6/263	169/18805	0.0355029585798817	2.53852903458051	2.39275044166379	0.0317780022543059	0.236897098253254	0.207211646040223	STARD3/MED1/ASAH1/SNAI1/TNF/NR3C1	6
GO:0007584	response to nutrient	6/263	169/18805	0.0355029585798817	2.53852903458051	2.39275044166379	0.0317780022543059	0.236897098253254	0.207211646040223	MED1/PIM1/STC1/CDKN2B/KYNU/STC2	6
GO:0051963	regulation of synapse assembly	6/263	169/18805	0.0355029585798817	2.53852903458051	2.39275044166379	0.0317780022543059	0.236897098253254	0.207211646040223	FARP1/SLITRK6/FGFR1/ROBO2/EFNA5/CLSTN2	6
GO:0007162	negative regulation of cell adhesion	9/263	312/18805	0.0288461538461538	2.06255484059667	2.25397800328934	0.0319741337888365	0.237821153124642	0.208019908076118	KLF4/LGALS1/ERBB2/SOCS1/ANXA1/ASCL2/EFNA5/TACSTD2/PHLDB2	9
GO:0051347	positive regulation of transferase activity	8/263	263/18805	0.0304182509505703	2.17496277234021	2.28532725763412	0.0321277770513106	0.238425732847001	0.208548728227806	TRAF4/NEK10/LTF/ERBB2/FGFR1/SASH1/PIM1/TNF	8
GO:0008625	extrinsic apoptotic signaling pathway via death domain receptors	4/263	86/18805	0.0465116279069767	3.32566982049695	2.57442751129987	0.0325547738585777	0.239664304100816	0.209632094761771	BMPR1B/BEX3/TNFSF10/TNF	4
GO:0031670	cellular response to nutrient	3/263	50/18805	0.06	4.29011406844106	2.77435563038645	0.0327310885721903	0.239664304100816	0.209632094761771	MED1/PIM1/CDKN2B	3
GO:0035272	exocrine system development	3/263	50/18805	0.06	4.29011406844106	2.77435563038645	0.0327310885721903	0.239664304100816	0.209632094761771	FGFR1/FGFR2/TNF	3
GO:0045071	negative regulation of viral genome replication	3/263	50/18805	0.06	4.29011406844106	2.77435563038645	0.0327310885721903	0.239664304100816	0.209632094761771	LTF/MX1/TNF	3
GO:0046686	response to cadmium ion	3/263	50/18805	0.06	4.29011406844106	2.77435563038645	0.0327310885721903	0.239664304100816	0.209632094761771	MT1E/SLC39A8/MT1G	3
GO:2000404	regulation of T cell migration	3/263	50/18805	0.06	4.29011406844106	2.77435563038645	0.0327310885721903	0.239664304100816	0.209632094761771	ECM1/ASCL2/S100A7	3
GO:0050920	regulation of chemotaxis	7/263	217/18805	0.032258064516129	2.30651294002208	2.30543009219381	0.0333321582441454	0.24352430468838	0.213008400682624	SMOC2/FGFR1/CXCR4/MTUS1/ROBO2/S100A7/CXCL8	7
GO:0007492	endoderm development	4/263	87/18805	0.0459770114942529	3.28744373060618	2.54685975909203	0.0337621354051765	0.243956970562301	0.213386849420839	DUSP5/MESP1/DUSP4/FN1	4
GO:0052547	regulation of peptidase activity	4/263	87/18805	0.0459770114942529	3.28744373060618	2.54685975909203	0.0337621354051765	0.243956970562301	0.213386849420839	ATP13A2/ECM1/TIMP3/CSTA	4
GO:0030282	bone mineralization	5/263	128/18805	0.0390625	2.79304301330798	2.4241910334739	0.0340602063583562	0.243956970562301	0.213386849420839	BMPR1B/KLF10/LTF/ECM1/FGFR2	5
GO:0002523	leukocyte migration involved in inflammatory response	2/263	21/18805	0.0952380952380952	6.80970487054137	3.17244707611032	0.0343581506360178	0.243956970562301	0.213386849420839	TNF/S100A9	2
GO:0002544	chronic inflammatory response	2/263	21/18805	0.0952380952380952	6.80970487054137	3.17244707611032	0.0343581506360178	0.243956970562301	0.213386849420839	TNF/S100A9	2
GO:0006244	pyrimidine nucleotide catabolic process	2/263	21/18805	0.0952380952380952	6.80970487054137	3.17244707611032	0.0343581506360178	0.243956970562301	0.213386849420839	ENTPD5/ENTPD4	2
GO:0006670	sphingosine metabolic process	2/263	21/18805	0.0952380952380952	6.80970487054137	3.17244707611032	0.0343581506360178	0.243956970562301	0.213386849420839	ASAH1/SPTSSB	2
GO:0046596	regulation of viral entry into host cell	2/263	21/18805	0.0952380952380952	6.80970487054137	3.17244707611032	0.0343581506360178	0.243956970562301	0.213386849420839	LGALS1/TMPRSS2	2
GO:0048670	regulation of collateral sprouting	2/263	21/18805	0.0952380952380952	6.80970487054137	3.17244707611032	0.0343581506360178	0.243956970562301	0.213386849420839	SPART/EFNA5	2
GO:0050965	detection of temperature stimulus involved in sensory perception of pain	2/263	21/18805	0.0952380952380952	6.80970487054137	3.17244707611032	0.0343581506360178	0.243956970562301	0.213386849420839	CXCR4/LXN	2
GO:0072567	chemokine (C-X-C motif) ligand 2 production	2/263	21/18805	0.0952380952380952	6.80970487054137	3.17244707611032	0.0343581506360178	0.243956970562301	0.213386849420839	KLF4/TNF	2
GO:2000010	positive regulation of protein localization to cell surface	2/263	21/18805	0.0952380952380952	6.80970487054137	3.17244707611032	0.0343581506360178	0.243956970562301	0.213386849420839	ERBB4/TNF	2
GO:2000341	regulation of chemokine (C-X-C motif) ligand 2 production	2/263	21/18805	0.0952380952380952	6.80970487054137	3.17244707611032	0.0343581506360178	0.243956970562301	0.213386849420839	KLF4/TNF	2
GO:0043368	positive T cell selection	3/263	51/18805	0.0588235294117647	4.20599418474614	2.73039556353864	0.0344279184556814	0.243956970562301	0.213386849420839	LGALS1/SOCS3/BATF	3
GO:0002819	regulation of adaptive immune response	7/263	219/18805	0.0319634703196347	2.28544889490772	2.27881260682487	0.0347672953101153	0.245306719586359	0.214567462096462	LGALS1/IL1R1/ANXA1/ASCL2/HPX/TNF/BATF	7
GO:0044706	multi-multicellular organism process	7/263	219/18805	0.0319634703196347	2.28544889490772	2.27881260682487	0.0347672953101153	0.245306719586359	0.214567462096462	MED1/PGR/CTSB/KLK14/RGS2/STC1/STC2	7
GO:0050810	regulation of steroid biosynthetic process	4/263	88/18805	0.0454545454545455	3.25008641548565	2.51969004839105	0.0349953141576212	0.246214108566048	0.215361146634882	ASAH1/SNAI1/TNF/NR3C1	4
GO:0003231	cardiac ventricle development	5/263	129/18805	0.0387596899224806	2.77139151708079	2.40431956356186	0.0350453465606909	0.246214108566048	0.215361146634882	MED1/FRS2/MESP1/ROBO2/FGFR2	5
GO:0044403	biological process involved in symbiotic interaction	7/263	220/18805	0.0318181818181818	2.27506049083996	2.26561209075032	0.0355000227804537	0.248877819279989	0.217691069144193	LGALS1/LTF/CTSB/CXCR4/FN1/TMPRSS2/CXCL8	7
GO:0010466	negative regulation of peptidase activity	3/263	52/18805	0.0576923076923077	4.12510968119333	2.68754822807364	0.0361695221681188	0.251941803673859	0.220371107246714	ECM1/TIMP3/CSTA	3
GO:0089718	amino acid import across plasma membrane	3/263	52/18805	0.0576923076923077	4.12510968119333	2.68754822807364	0.0361695221681188	0.251941803673859	0.220371107246714	RGS2/TNF/SLC43A1	3
GO:1904262	negative regulation of TORC1 signaling	3/263	52/18805	0.0576923076923077	4.12510968119333	2.68754822807364	0.0361695221681188	0.251941803673859	0.220371107246714	PRKACB/SESN3/WDR24	3
GO:0006643	membrane lipid metabolic process	7/263	221/18805	0.0316742081447964	2.26476609947869	2.25248268869408	0.0362429180398814	0.251941803673859	0.220371107246714	ASAH1/DEGS2/PGAP3/SPTSSB/HACD4/TNF/ALDH3B2	7
GO:0007259	cell surface receptor signaling pathway via JAK-STAT	5/263	131/18805	0.0381679389312977	2.72908019620933	2.36513978944042	0.0370681244859919	0.25552190414507	0.223502587189266	GADD45A/SOCS1/SOCS3/ERBB4/TNF	5
GO:0032612	interleukin-1 production	5/263	131/18805	0.0381679389312977	2.72908019620933	2.36513978944042	0.0370681244859919	0.25552190414507	0.223502587189266	GSTP1/PYDC1/ANXA1/NLRP2/TNF	5
GO:0032652	regulation of interleukin-1 production	5/263	131/18805	0.0381679389312977	2.72908019620933	2.36513978944042	0.0370681244859919	0.25552190414507	0.223502587189266	GSTP1/PYDC1/ANXA1/NLRP2/TNF	5
GO:0045471	response to ethanol	5/263	131/18805	0.0381679389312977	2.72908019620933	2.36513978944042	0.0370681244859919	0.25552190414507	0.223502587189266	RGS2/CTSK/ITPR2/FGFR2/TNF	5
GO:0009110	vitamin biosynthetic process	2/263	22/18805	0.0909090909090909	6.50017283097131	3.07418433176127	0.0374518602910003	0.255952388728879	0.223879127973699	SNAI1/TNF	2
GO:0060004	reflex	2/263	22/18805	0.0909090909090909	6.50017283097131	3.07418433176127	0.0374518602910003	0.255952388728879	0.223879127973699	SLITRK6/HPN	2
GO:0060193	positive regulation of lipase activity	2/263	22/18805	0.0909090909090909	6.50017283097131	3.07418433176127	0.0374518602910003	0.255952388728879	0.223879127973699	FGFR1/FGFR2	2
GO:0060713	labyrinthine layer morphogenesis	2/263	22/18805	0.0909090909090909	6.50017283097131	3.07418433176127	0.0374518602910003	0.255952388728879	0.223879127973699	SOCS3/FGFR2	2
GO:0048145	regulation of fibroblast proliferation	4/263	90/18805	0.0444444444444444	3.17786227291931	2.46650191972386	0.037539275350654	0.255952388728879	0.223879127973699	GSTP1/S100A6/FN1/CDC6	4
GO:0051701	biological process involved in interaction with host	6/263	176/18805	0.0340909090909091	2.43756481161424	2.28198982350101	0.0375966482988702	0.255952388728879	0.223879127973699	LGALS1/LTF/CTSB/CXCR4/TMPRSS2/CXCL8	6
GO:0009755	hormone-mediated signaling pathway	7/263	223/18805	0.031390134529148	2.24445429589592	2.22643418720388	0.0377593907438257	0.256530293816301	0.224384616075084	MED1/PGR/PIM1/PRCP/LBH/NR3C1/SCGB2A2	7
GO:0022602	ovulation cycle process	3/263	53/18805	0.0566037735849057	4.04727742305761	2.64576239131256	0.0379556777993388	0.256804842605382	0.224624761298151	BMPR1B/PGR/ROBO2	3
GO:1904707	positive regulation of vascular associated smooth muscle cell proliferation	3/263	53/18805	0.0566037735849057	4.04727742305761	2.64576239131256	0.0379556777993388	0.256804842605382	0.224624761298151	FRS2/FGFR2/TNF	3
GO:0010810	regulation of cell-substrate adhesion	7/263	224/18805	0.03125	2.23443441064639	2.21351359711087	0.0385330547853752	0.260177080979122	0.227574426234593	JUP/FBLN2/LIMCH1/FN1/EFNA5/TACSTD2/PHLDB2	7
GO:0045619	regulation of lymphocyte differentiation	7/263	225/18805	0.0311111111111111	2.22450359104351	2.20066113925852	0.0393170597933892	0.264927836440118	0.231729866998815	LGALS1/ERBB2/SOCS1/ANXA1/ASCL2/RHOH/BATF	7
GO:0048146	positive regulation of fibroblast proliferation	3/263	54/18805	0.0555555555555556	3.97232784114913	2.60499011460045	0.0397861421748235	0.266271724812791	0.232905353418232	S100A6/FN1/CDC6	3
GO:0048762	mesenchymal cell differentiation	8/263	275/18805	0.0290909090909091	2.08005530591082	2.14881654471887	0.0401178841524505	0.266271724812791	0.232905353418232	SNAI1/LDLRAD4/HPN/FGFR1/ERBB4/FN1/FGFR2/PHLDB2	8
GO:0002088	lens development in camera-type eye	4/263	92/18805	0.0434782608695652	3.10877831046454	2.41478148929104	0.0401868774202332	0.266271724812791	0.232905353418232	MED1/FRS2/SLITRK6/BCAR3	4
GO:2000628	regulation of miRNA metabolic process	4/263	92/18805	0.0434782608695652	3.10877831046454	2.41478148929104	0.0401868774202332	0.266271724812791	0.232905353418232	KLF4/XIST/TNF/NR3C1	4
GO:0009651	response to salt stress	2/263	23/18805	0.0869565217391304	6.21755662092908	2.98184371761308	0.0406478535905414	0.266271724812791	0.232905353418232	EFHD1/TNF	2
GO:0010955	negative regulation of protein processing	2/263	23/18805	0.0869565217391304	6.21755662092908	2.98184371761308	0.0406478535905414	0.266271724812791	0.232905353418232	PLAT/TMEM98	2
GO:0032986	protein-DNA complex disassembly	2/263	23/18805	0.0869565217391304	6.21755662092908	2.98184371761308	0.0406478535905414	0.266271724812791	0.232905353418232	RPL23/ATAD2	2
GO:0034755	iron ion transmembrane transport	2/263	23/18805	0.0869565217391304	6.21755662092908	2.98184371761308	0.0406478535905414	0.266271724812791	0.232905353418232	SLC39A8/STEAP2	2
GO:0038128	ERBB2 signaling pathway	2/263	23/18805	0.0869565217391304	6.21755662092908	2.98184371761308	0.0406478535905414	0.266271724812791	0.232905353418232	ERBB2/ERBB4	2
GO:0046426	negative regulation of receptor signaling pathway via JAK-STAT	2/263	23/18805	0.0869565217391304	6.21755662092908	2.98184371761308	0.0406478535905414	0.266271724812791	0.232905353418232	SOCS1/SOCS3	2
GO:0060444	branching involved in mammary gland duct morphogenesis	2/263	23/18805	0.0869565217391304	6.21755662092908	2.98184371761308	0.0406478535905414	0.266271724812791	0.232905353418232	MED1/PGR	2
GO:0060706	cell differentiation involved in embryonic placenta development	2/263	23/18805	0.0869565217391304	6.21755662092908	2.98184371761308	0.0406478535905414	0.266271724812791	0.232905353418232	KRT19/SNAI1	2
GO:0071305	cellular response to vitamin D	2/263	23/18805	0.0869565217391304	6.21755662092908	2.98184371761308	0.0406478535905414	0.266271724812791	0.232905353418232	MED1/PIM1	2
GO:0099188	postsynaptic cytoskeleton organization	2/263	23/18805	0.0869565217391304	6.21755662092908	2.98184371761308	0.0406478535905414	0.266271724812791	0.232905353418232	FARP1/NEFH	2
GO:0097305	response to alcohol	8/263	276/18805	0.0289855072463768	2.07251887364303	2.13775632926379	0.0408384082068922	0.266989196511329	0.233532919111259	JUP/FKBP5/RGS2/CTSK/ITPR2/FGFR2/EFNA5/TNF	8
GO:0043401	steroid hormone receptor signaling pathway	5/263	135/18805	0.037037037037037	2.64821856076609	2.28893907352777	0.0413251706753262	0.269636509653861	0.235848498820309	MED1/PGR/LBH/NR3C1/SCGB2A2	5
GO:0051896	regulation of phosphatidylinositol 3-kinase/protein kinase B signal transduction	8/263	278/18805	0.0287769784172662	2.05760866591898	2.11577535976204	0.0423052154912225	0.27523473313231	0.240745211825338	GDF15/SESN3/FGFR1/ERBB4/FN1/TSPYL5/MEIS3/TNF	8
GO:0044409	symbiont entry into host	5/263	136/18805	0.0367647058823529	2.62874636546634	2.27032009438541	0.0424337615876217	0.27523473313231	0.240745211825338	LGALS1/CTSB/CXCR4/TMPRSS2/CXCL8	5
GO:0050868	negative regulation of T cell activation	5/263	136/18805	0.0367647058823529	2.62874636546634	2.27032009438541	0.0424337615876217	0.27523473313231	0.240745211825338	LGALS1/ERBB2/SOCS1/ANXA1/ASCL2	5
GO:1904705	regulation of vascular associated smooth muscle cell proliferation	4/263	94/18805	0.0425531914893617	3.04263409109295	2.36445313509211	0.0429382080131565	0.276847337303421	0.242155741406203	FRS2/FGFR2/TNF/NDRG2	4
GO:0031214	biomineral tissue development	6/263	182/18805	0.032967032967033	2.35720553211048	2.19119587008113	0.0430935292881277	0.276847337303421	0.242155741406203	BMPR1B/KLF10/LTF/ECM1/FGFR1/FGFR2	6
GO:0036230	granulocyte activation	3/263	56/18805	0.0535714285714286	3.83045898967952	2.52630937024533	0.0435789234505569	0.276847337303421	0.242155741406203	ANXA1/TNF/CXCL8	3
GO:0085029	extracellular matrix assembly	3/263	56/18805	0.0535714285714286	3.83045898967952	2.52630937024533	0.0435789234505569	0.276847337303421	0.242155741406203	FKBP10/RAMP2/PHLDB2	3
GO:1902895	positive regulation of miRNA transcription	3/263	56/18805	0.0535714285714286	3.83045898967952	2.52630937024533	0.0435789234505569	0.276847337303421	0.242155741406203	KLF4/TNF/NR3C1	3
GO:0002922	positive regulation of humoral immune response	2/263	24/18805	0.0833333333333333	5.9584917617237	2.89481335576524	0.0439426881364762	0.276847337303421	0.242155741406203	HPX/TNF	2
GO:0009074	aromatic amino acid family catabolic process	2/263	24/18805	0.0833333333333333	5.9584917617237	2.89481335576524	0.0439426881364762	0.276847337303421	0.242155741406203	QDPR/KYNU	2
GO:0032770	positive regulation of monooxygenase activity	2/263	24/18805	0.0833333333333333	5.9584917617237	2.89481335576524	0.0439426881364762	0.276847337303421	0.242155741406203	S100A1/TNF	2
GO:0034114	regulation of heterotypic cell-cell adhesion	2/263	24/18805	0.0833333333333333	5.9584917617237	2.89481335576524	0.0439426881364762	0.276847337303421	0.242155741406203	KLF4/TNF	2
GO:0042659	regulation of cell fate specification	2/263	24/18805	0.0833333333333333	5.9584917617237	2.89481335576524	0.0439426881364762	0.276847337303421	0.242155741406203	MESP1/FGFR1	2
GO:0046885	regulation of hormone biosynthetic process	2/263	24/18805	0.0833333333333333	5.9584917617237	2.89481335576524	0.0439426881364762	0.276847337303421	0.242155741406203	STC2/NR3C1	2
GO:0048015	phosphatidylinositol-mediated signaling	2/263	24/18805	0.0833333333333333	5.9584917617237	2.89481335576524	0.0439426881364762	0.276847337303421	0.242155741406203	FGFR1/PIK3C2G	2
GO:0098743	cell aggregation	2/263	24/18805	0.0833333333333333	5.9584917617237	2.89481335576524	0.0439426881364762	0.276847337303421	0.242155741406203	BMPR1B/LTF	2
GO:1903861	positive regulation of dendrite extension	2/263	24/18805	0.0833333333333333	5.9584917617237	2.89481335576524	0.0439426881364762	0.276847337303421	0.242155741406203	CXCR4/RIMS2	2
GO:2001026	regulation of endothelial cell chemotaxis	2/263	24/18805	0.0833333333333333	5.9584917617237	2.89481335576524	0.0439426881364762	0.276847337303421	0.242155741406203	SMOC2/FGFR1	2
GO:0007589	body fluid secretion	4/263	95/18805	0.0421052631578947	3.01060636381829	2.33978885960786	0.044352763551553	0.278366392194985	0.243484444319102	MED1/CYBA/CELSR2/ERBB4	4
GO:0051492	regulation of stress fiber assembly	4/263	95/18805	0.0421052631578947	3.01060636381829	2.33978885960786	0.044352763551553	0.278366392194985	0.243484444319102	EVL/LIMCH1/TACSTD2/PHLDB2	4
GO:0051090	regulation of DNA-binding transcription factor activity	9/263	332/18805	0.0271084337349398	1.93830454899446	2.05432360171265	0.0445330515223598	0.278966548985125	0.244009395773907	LTF/JUP/PIM1/RIPK4/ID1/HES6/FZD6/TNF/S100A9	9
GO:0010562	positive regulation of phosphorus metabolic process	12/263	493/18805	0.0243407707910751	1.74041138679151	1.98405344226322	0.0452462950021763	0.282360875060929	0.246978380613953	TRAF4/GFRA1/NEK10/LTF/ERBB2/FGFR1/LIMCH1/SASH1/PIM1/ERBB4/EFNA5/TNF	12
GO:0045937	positive regulation of phosphate metabolic process	12/263	493/18805	0.0243407707910751	1.74041138679151	1.98405344226322	0.0452462950021763	0.282360875060929	0.246978380613953	TRAF4/GFRA1/NEK10/LTF/ERBB2/FGFR1/LIMCH1/SASH1/PIM1/ERBB4/EFNA5/TNF	12
GO:0071385	cellular response to glucocorticoid stimulus	3/263	57/18805	0.0526315789473684	3.76325795477286	2.48831920493868	0.0455406555642531	0.282563069757806	0.24715523839849	ANXA1/STC1/NR3C1	3
GO:0007044	cell-substrate junction assembly	4/263	96/18805	0.0416666666666667	2.97924588086185	2.31544668746756	0.0457932258727371	0.282563069757806	0.24715523839849	LIMCH1/FN1/EFNA5/PHLDB2	4
GO:0016239	positive regulation of macroautophagy	4/263	96/18805	0.0416666666666667	2.97924588086185	2.31544668746756	0.0457932258727371	0.282563069757806	0.24715523839849	HSPB8/SESN3/WDR24/SNX30	4
GO:0045104	intermediate filament cytoskeleton organization	4/263	96/18805	0.0416666666666667	2.97924588086185	2.31544668746756	0.0457932258727371	0.282563069757806	0.24715523839849	KRT19/KRT15/KRT23/NEFH	4
GO:0072091	regulation of stem cell proliferation	4/263	96/18805	0.0416666666666667	2.97924588086185	2.31544668746756	0.0457932258727371	0.282563069757806	0.24715523839849	SFN/OVOL1/FGFR1/PIM1	4
GO:1990874	vascular associated smooth muscle cell proliferation	4/263	96/18805	0.0416666666666667	2.97924588086185	2.31544668746756	0.0457932258727371	0.282563069757806	0.24715523839849	FRS2/FGFR2/TNF/NDRG2	4
GO:0045926	negative regulation of growth	7/263	233/18805	0.0300429184549356	2.14812578534245	2.10021038133393	0.0459659846443065	0.283098914771944	0.247623936952506	MT1E/GDF15/RGS2/SPART/MT1G/OSGIN1/STC2	7
GO:0001942	hair follicle development	4/263	97/18805	0.0412371134020619	2.94853200580142	2.2914186176029	0.0472595702652531	0.283295689764862	0.24779605417337	SNAI1/FZD6/FGFR2/TNF	4
GO:0045103	intermediate filament-based process	4/263	97/18805	0.0412371134020619	2.94853200580142	2.2914186176029	0.0472595702652531	0.283295689764862	0.24779605417337	KRT19/KRT15/KRT23/NEFH	4
GO:1904892	regulation of receptor signaling pathway via STAT	4/263	97/18805	0.0412371134020619	2.94853200580142	2.2914186176029	0.0472595702652531	0.283295689764862	0.24779605417337	GADD45A/SOCS1/SOCS3/ERBB4	4
GO:0050727	regulation of inflammatory response	11/263	442/18805	0.0248868778280543	1.77945907816183	1.97495563527122	0.0472668818706601	0.283295689764862	0.24779605417337	GSTP1/KLF4/LGALS1/IL1R1/SLC39A8/SOCS3/ANXA1/NLRP2/TNF/OSMR/S100A9	11
GO:0003085	negative regulation of systemic arterial blood pressure	2/263	25/18805	0.08	5.72015209125475	2.81256721505781	0.0473329971652057	0.283295689764862	0.24779605417337	TNF/PRCP	2
GO:0003091	renal water homeostasis	2/263	25/18805	0.08	5.72015209125475	2.81256721505781	0.0473329971652057	0.283295689764862	0.24779605417337	PRKACB/MLLT6	2
GO:0006817	phosphate ion transport	2/263	25/18805	0.08	5.72015209125475	2.81256721505781	0.0473329971652057	0.283295689764862	0.24779605417337	SLC37A1/FGFR1	2
GO:0008211	glucocorticoid metabolic process	2/263	25/18805	0.08	5.72015209125475	2.81256721505781	0.0473329971652057	0.283295689764862	0.24779605417337	NR3C1/SERPINA6	2
GO:0016082	synaptic vesicle priming	2/263	25/18805	0.08	5.72015209125475	2.81256721505781	0.0473329971652057	0.283295689764862	0.24779605417337	STXBP1/RIMS2	2
GO:0040037	negative regulation of fibroblast growth factor receptor signaling pathway	2/263	25/18805	0.08	5.72015209125475	2.81256721505781	0.0473329971652057	0.283295689764862	0.24779605417337	CREB3L1/SULF2	2
GO:0045932	negative regulation of muscle contraction	2/263	25/18805	0.08	5.72015209125475	2.81256721505781	0.0473329971652057	0.283295689764862	0.24779605417337	TNNT1/RGS2	2
GO:0050961	detection of temperature stimulus involved in sensory perception	2/263	25/18805	0.08	5.72015209125475	2.81256721505781	0.0473329971652057	0.283295689764862	0.24779605417337	CXCR4/LXN	2
GO:0071280	cellular response to copper ion	2/263	25/18805	0.08	5.72015209125475	2.81256721505781	0.0473329971652057	0.283295689764862	0.24779605417337	MT1E/MT1G	2
GO:1903318	negative regulation of protein maturation	2/263	25/18805	0.08	5.72015209125475	2.81256721505781	0.0473329971652057	0.283295689764862	0.24779605417337	PLAT/TMEM98	2
GO:1903902	positive regulation of viral life cycle	2/263	25/18805	0.08	5.72015209125475	2.81256721505781	0.0473329971652057	0.283295689764862	0.24779605417337	LGALS1/TMPRSS2	2
GO:0061756	leukocyte adhesion to vascular endothelial cell	3/263	58/18805	0.0517241379310345	3.69837419693195	2.45117878703696	0.0475455285098539	0.283295689764862	0.24779605417337	KLF4/SLC39A8/TNF	3
GO:0072132	mesenchyme morphogenesis	3/263	58/18805	0.0517241379310345	3.69837419693195	2.45117878703696	0.0475455285098539	0.283295689764862	0.24779605417337	SNAI1/FGFR1/ROBO2	3
GO:2001238	positive regulation of extrinsic apoptotic signaling pathway	3/263	58/18805	0.0517241379310345	3.69837419693195	2.45117878703696	0.0475455285098539	0.283295689764862	0.24779605417337	BMPR1B/TNFSF10/TNF	3
GO:0097191	extrinsic apoptotic signaling pathway	7/263	237/18805	0.029535864978903	2.11187049782612	2.05149528570937	0.0495452709312415	0.293902181016378	0.257073451520755	BMPR1B/BEX3/GSTP1/KLF4/FGFR1/TNFSF10/TNF	7
GO:0097529	myeloid leukocyte migration	7/263	237/18805	0.029535864978903	2.11187049782612	2.05149528570937	0.0495452709312415	0.293902181016378	0.257073451520755	CD99/IL1R1/ANXA1/MTUS1/S100A7/CXCL8/S100A9	7
GO:0009948	anterior/posterior axis specification	3/263	59/18805	0.0508474576271186	3.63568988850938	2.41485310066715	0.0495932056586059	0.293902181016378	0.257073451520755	FRS2/MESP1/ETS2	3
GO:0032970	regulation of actin filament-based process	10/263	392/18805	0.0255102040816327	1.82402809032358	1.96357493948339	0.0497273555125397	0.294168108462869	0.257306055737189	EVL/ADD3/IQGAP2/RND3/JUP/LIMCH1/STC1/EFNA5/TACSTD2/PHLDB2	10
GO:0009798	axis specification	4/263	99/18805	0.0404040404040404	2.88896570265392	2.24427417518417	0.0502697685241191	0.296843884026832	0.259646531256439	FRS2/MESP1/ETS2/STC1	4
GO:0007411	axon guidance	7/263	238/18805	0.0294117647058824	2.10299709237307	2.03946700950658	0.0504669630164999	0.296874172608584	0.259673024391759	BMPR1B/EVL/ERBB2/NELL2/PALLD/ROBO2/EFNA5	7
GO:0050770	regulation of axonogenesis	5/263	143/18805	0.034965034965035	2.5000664734505	2.14449055584765	0.0506940927194912	0.296874172608584	0.259673024391759	KIF13B/SPART/ROBO2/FN1/EFNA5	5
GO:0003148	outflow tract septum morphogenesis	2/263	26/18805	0.0769230769230769	5.50014624159111	2.7346501720866	0.0508154881187379	0.296874172608584	0.259673024391759	ROBO2/FGFR2	2
GO:0060740	prostate gland epithelium morphogenesis	2/263	26/18805	0.0769230769230769	5.50014624159111	2.7346501720866	0.0508154881187379	0.296874172608584	0.259673024391759	FRS2/FGFR2	2
GO:0090314	positive regulation of protein targeting to membrane	2/263	26/18805	0.0769230769230769	5.50014624159111	2.7346501720866	0.0508154881187379	0.296874172608584	0.259673024391759	STOM/ERBB2	2
GO:2000810	regulation of bicellular tight junction assembly	2/263	26/18805	0.0769230769230769	5.50014624159111	2.7346501720866	0.0508154881187379	0.296874172608584	0.259673024391759	SNAI1/TNF	2
GO:0032102	negative regulation of response to external stimulus	11/263	448/18805	0.0245535714285714	1.75562703693645	1.92783716821253	0.0511323105485759	0.297894592482214	0.260565575981568	GSTP1/KLF4/PLAT/LTF/SLC39A8/SFN/SOCS3/PIM1/ROBO2/TNF/PHLDB2	11
GO:0007565	female pregnancy	6/263	190/18805	0.0315789473684211	2.25795477286372	2.07555867211476	0.0511709679347294	0.297894592482214	0.260565575981568	MED1/PGR/CTSB/RGS2/STC1/STC2	6
GO:0097485	neuron projection guidance	7/263	239/18805	0.0292887029288703	2.09419794135896	2.02749773587094	0.0513994551043377	0.297950434973438	0.260614420879251	BMPR1B/EVL/ERBB2/NELL2/PALLD/ROBO2/EFNA5	7
GO:0001657	ureteric bud development	4/263	100/18805	0.04	2.86007604562738	2.22114315784329	0.0518135354293718	0.297950434973438	0.260614420879251	FGFR1/ROBO2/FGFR2/TACSTD2	4
GO:0022404	molting cycle process	4/263	100/18805	0.04	2.86007604562738	2.22114315784329	0.0518135354293718	0.297950434973438	0.260614420879251	SNAI1/FZD6/FGFR2/TNF	4
GO:0022405	hair cycle process	4/263	100/18805	0.04	2.86007604562738	2.22114315784329	0.0518135354293718	0.297950434973438	0.260614420879251	SNAI1/FZD6/FGFR2/TNF	4
GO:0051346	negative regulation of hydrolase activity	4/263	100/18805	0.04	2.86007604562738	2.22114315784329	0.0518135354293718	0.297950434973438	0.260614420879251	ECM1/TIMP3/RGS2/CSTA	4
GO:0060349	bone morphogenesis	4/263	100/18805	0.04	2.86007604562738	2.22114315784329	0.0518135354293718	0.297950434973438	0.260614420879251	BMPR1B/LTF/FGFR2/STC1	4
GO:1903432	regulation of TORC1 signaling	4/263	100/18805	0.04	2.86007604562738	2.22114315784329	0.0518135354293718	0.297950434973438	0.260614420879251	PRKACB/SESN3/PIM1/WDR24	4
GO:0001764	neuron migration	6/263	191/18805	0.031413612565445	2.24613302012621	2.06151234626946	0.0522414900732374	0.299366451810987	0.261852997383111	PCM1/CELSR2/FGFR1/CXCR4/ERBB4/SOCS7	6
GO:0009267	cellular response to starvation	6/263	191/18805	0.031413612565445	2.24613302012621	2.06151234626946	0.0522414900732374	0.299366451810987	0.261852997383111	DNAJC15/KLF10/SESN3/CTSK/WDR24/FADS1	6
GO:0001837	epithelial to mesenchymal transition	6/263	192/18805	0.03125	2.23443441064639	2.04755300081746	0.0533256118653817	0.304252922560239	0.26612714702338	SNAI1/LDLRAD4/HPN/FGFR1/FGFR2/PHLDB2	6
GO:0072163	mesonephric epithelium development	4/263	101/18805	0.0396039603960396	2.8317584610172	2.19829692984532	0.053383010724543	0.304252922560239	0.26612714702338	FGFR1/ROBO2/FGFR2/TACSTD2	4
GO:0072164	mesonephric tubule development	4/263	101/18805	0.0396039603960396	2.8317584610172	2.19829692984532	0.053383010724543	0.304252922560239	0.26612714702338	FGFR1/ROBO2/FGFR2/TACSTD2	4
GO:0045787	positive regulation of cell cycle	9/263	344/18805	0.0261627906976744	1.87068927402953	1.94106246564311	0.0534702050580184	0.304252922560239	0.26612714702338	MED1/SMOC2/OVOL1/FGFR1/PIM1/ANXA1/FGFR2/CDC6/TNF	9
GO:0014009	glial cell proliferation	3/263	61/18805	0.0491803278688525	3.51648694134514	2.34452	0.0538155454140442	0.304252922560239	0.26612714702338	ASCL2/TNF/CDKN2B	3
GO:0097300	programmed necrotic cell death	3/263	61/18805	0.0491803278688525	3.51648694134514	2.34452	0.0538155454140442	0.304252922560239	0.26612714702338	ASAH1/PYGL/TNF	3
GO:0018904	ether metabolic process	2/263	27/18805	0.0740740740740741	5.29643712153218	2.66066613603511	0.0543869412406618	0.304252922560239	0.26612714702338	EPHX2/FASN	2
GO:0031639	plasminogen activation	2/263	27/18805	0.0740740740740741	5.29643712153218	2.66066613603511	0.0543869412406618	0.304252922560239	0.26612714702338	PLAT/HPN	2
GO:0042759	long-chain fatty acid biosynthetic process	2/263	27/18805	0.0740740740740741	5.29643712153218	2.66066613603511	0.0543869412406618	0.304252922560239	0.26612714702338	GSTP1/FADS1	2
GO:0043507	positive regulation of JUN kinase activity	2/263	27/18805	0.0740740740740741	5.29643712153218	2.66066613603511	0.0543869412406618	0.304252922560239	0.26612714702338	SASH1/TNF	2
GO:0060333	type II interferon-mediated signaling pathway	2/263	27/18805	0.0740740740740741	5.29643712153218	2.66066613603511	0.0543869412406618	0.304252922560239	0.26612714702338	MED1/HPX	2
GO:0060669	embryonic placenta morphogenesis	2/263	27/18805	0.0740740740740741	5.29643712153218	2.66066613603511	0.0543869412406618	0.304252922560239	0.26612714702338	SOCS3/FGFR2	2
GO:1903859	regulation of dendrite extension	2/263	27/18805	0.0740740740740741	5.29643712153218	2.66066613603511	0.0543869412406618	0.304252922560239	0.26612714702338	CXCR4/RIMS2	2
GO:2000737	negative regulation of stem cell differentiation	2/263	27/18805	0.0740740740740741	5.29643712153218	2.66066613603511	0.0543869412406618	0.304252922560239	0.26612714702338	CDK12/LBH	2
GO:0050921	positive regulation of chemotaxis	5/263	146/18805	0.0342465753424658	2.44869524454399	2.09283016885966	0.0545032589946082	0.304386844724126	0.266244287470539	SMOC2/FGFR1/CXCR4/S100A7/CXCL8	5
GO:2001233	regulation of apoptotic signaling pathway	10/263	399/18805	0.025062656641604	1.79202759751089	1.90445958399386	0.0547606186564333	0.305306664082822	0.267048844743636	BMPR1B/GSTP1/KLF4/SNAI1/CREB3L1/FGFR1/TNFSF10/MEIS3/TNF/S100A9	10
GO:0048009	insulin-like growth factor receptor signaling pathway	4/263	102/18805	0.0392156862745098	2.80399612316409	2.17572877730839	0.0549781328820663	0.305485578155832	0.267205339187179	ERBB2/FGFR1/ERBB4/FGFR2	4
GO:0048640	negative regulation of developmental growth	4/263	102/18805	0.0392156862745098	2.80399612316409	2.17572877730839	0.0549781328820663	0.305485578155832	0.267205339187179	GDF15/RGS2/SPART/STC2	4
GO:0006941	striated muscle contraction	6/263	194/18805	0.0309278350515464	2.21139900435106	2.01989098048972	0.0555347254062348	0.308058788238289	0.269456101652084	TNNT1/JUP/CXCR4/RGS2/STC1/TNF	6
GO:0032731	positive regulation of interleukin-1 beta production	3/263	62/18805	0.0483870967741935	3.45976941003312	2.31044372819021	0.0559894563652985	0.309539024704125	0.270751	PYDC1/NLRP2/TNF	3
GO:0071709	membrane assembly	3/263	62/18805	0.0483870967741935	3.45976941003312	2.31044372819021	0.0559894563652985	0.309539024704125	0.270751	TLCD1/MAFB/DMKN	3
GO:0051588	regulation of neurotransmitter transport	4/263	103/18805	0.0388349514563107	2.7767728598324	2.1534322108651	0.0565988333765487	0.31083368963733	0.271883281599556	FBXL20/STXBP1/RIMS2/SNCG	4
GO:0150115	cell-substrate junction organization	4/263	103/18805	0.0388349514563107	2.7767728598324	2.1534322108651	0.0565988333765487	0.31083368963733	0.271883281599556	LIMCH1/FN1/EFNA5/PHLDB2	4
GO:0042063	gliogenesis	9/263	348/18805	0.0258620689655172	1.84918709846598	1.9043078618916	0.0566921551584393	0.31083368963733	0.271883281599556	TMEM98/ERBB2/CXCR4/ASCL2/SOCS7/TNF/CDKN2B/NR3C1/S100A9	9
GO:0071675	regulation of mononuclear cell migration	5/263	148/18805	0.0337837837837838	2.41560476826637	2.05909638380411	0.0571325297934758	0.31083368963733	0.271883281599556	ECM1/MTUS1/ASCL2/TNF/S100A7	5
GO:0001701	in utero embryonic development	10/263	403/18805	0.0248138957816377	1.77424072309391	1.87120223439092	0.0577829131715733	0.31083368963733	0.271883281599556	KRT19/KLF4/MED1/FKBP10/SNAI1/RCN1/SOCS3/FGFR1/ASCL2/FGFR2	10
GO:0050954	sensory perception of mechanical stimulus	6/263	196/18805	0.0306122448979592	2.1888337083883	1.99256425664889	0.0577984306222236	0.31083368963733	0.271883281599556	SLITRK6/HPN/FGFR1/CXCR4/TNF/GJC3	6
GO:0001702	gastrulation with mouth forming second	2/263	28/18805	0.0714285714285714	5.10727865290603	2.5902685208112	0.0580442081966414	0.31083368963733	0.271883281599556	FRS2/ETS2	2
GO:0002675	positive regulation of acute inflammatory response	2/263	28/18805	0.0714285714285714	5.10727865290603	2.5902685208112	0.0580442081966414	0.31083368963733	0.271883281599556	TNF/OSMR	2
GO:0003272	endocardial cushion formation	2/263	28/18805	0.0714285714285714	5.10727865290603	2.5902685208112	0.0580442081966414	0.31083368963733	0.271883281599556	SNAI1/ROBO2	2
GO:0016048	detection of temperature stimulus	2/263	28/18805	0.0714285714285714	5.10727865290603	2.5902685208112	0.0580442081966414	0.31083368963733	0.271883281599556	CXCR4/LXN	2
GO:0035025	positive regulation of Rho protein signal transduction	2/263	28/18805	0.0714285714285714	5.10727865290603	2.5902685208112	0.0580442081966414	0.31083368963733	0.271883281599556	NET1/ERBB2	2
GO:0051043	regulation of membrane protein ectodomain proteolysis	2/263	28/18805	0.0714285714285714	5.10727865290603	2.5902685208112	0.0580442081966414	0.31083368963733	0.271883281599556	TIMP3/TNF	2
GO:0060117	auditory receptor cell development	2/263	28/18805	0.0714285714285714	5.10727865290603	2.5902685208112	0.0580442081966414	0.31083368963733	0.271883281599556	SLITRK6/FGFR1	2
GO:0060512	prostate gland morphogenesis	2/263	28/18805	0.0714285714285714	5.10727865290603	2.5902685208112	0.0580442081966414	0.31083368963733	0.271883281599556	FRS2/FGFR2	2
GO:0071624	positive regulation of granulocyte chemotaxis	2/263	28/18805	0.0714285714285714	5.10727865290603	2.5902685208112	0.0580442081966414	0.31083368963733	0.271883281599556	S100A7/CXCL8	2
GO:0072529	pyrimidine-containing compound catabolic process	2/263	28/18805	0.0714285714285714	5.10727865290603	2.5902685208112	0.0580442081966414	0.31083368963733	0.271883281599556	ENTPD5/ENTPD4	2
GO:1902221	erythrose 4-phosphate/phosphoenolpyruvate family amino acid metabolic process	2/263	28/18805	0.0714285714285714	5.10727865290603	2.5902685208112	0.0580442081966414	0.31083368963733	0.271883281599556	QDPR/KYNU	2
GO:2000647	negative regulation of stem cell proliferation	2/263	28/18805	0.0714285714285714	5.10727865290603	2.5902685208112	0.0580442081966414	0.31083368963733	0.271883281599556	SFN/OVOL1	2
GO:0034113	heterotypic cell-cell adhesion	3/263	63/18805	0.0476190476190476	3.40485243527069	2.27706510388819	0.0582046696528778	0.31083368963733	0.271883281599556	KLF4/JUP/TNF	3
GO:0051893	regulation of focal adhesion assembly	3/263	63/18805	0.0476190476190476	3.40485243527069	2.27706510388819	0.0582046696528778	0.31083368963733	0.271883281599556	LIMCH1/EFNA5/PHLDB2	3
GO:0090109	regulation of cell-substrate junction assembly	3/263	63/18805	0.0476190476190476	3.40485243527069	2.27706510388819	0.0582046696528778	0.31083368963733	0.271883281599556	LIMCH1/EFNA5/PHLDB2	3
GO:0001823	mesonephros development	4/263	105/18805	0.0380952380952381	2.72388194821655	2.10962894404223	0.0599166610327627	0.318942484818987	0.278975967872977	FGFR1/ROBO2/FGFR2/TACSTD2	4
GO:1990830	cellular response to leukemia inhibitory factor	4/263	105/18805	0.0380952380952381	2.72388194821655	2.10962894404223	0.0599166610327627	0.318942484818987	0.278975967872977	KLF4/SOCS3/TEX14/NEFH	4
GO:0033619	membrane protein proteolysis	3/263	64/18805	0.046875	3.35165161596958	2.2443536836592	0.0604607745831612	0.319772475524103	0.279701952874369	TIMP3/BACE2/TNF	3
GO:0045058	T cell selection	3/263	64/18805	0.046875	3.35165161596958	2.2443536836592	0.0604607745831612	0.319772475524103	0.279701952874369	LGALS1/SOCS3/BATF	3
GO:0048524	positive regulation of viral process	3/263	64/18805	0.046875	3.35165161596958	2.2443536836592	0.0604607745831612	0.319772475524103	0.279701952874369	LGALS1/STOM/TMPRSS2	3
GO:1903670	regulation of sprouting angiogenesis	3/263	64/18805	0.046875	3.35165161596958	2.2443536836592	0.0604607745831612	0.319772475524103	0.279701952874369	KLF4/CREB3L1/S100A1	3
GO:0110020	regulation of actomyosin structure organization	4/263	106/18805	0.0377358490566038	2.69818494870507	2.08811030324873	0.0616136172780812	0.322629119364779	0.282200632160615	EVL/LIMCH1/TACSTD2/PHLDB2	4
GO:1905477	positive regulation of protein localization to membrane	4/263	106/18805	0.0377358490566038	2.69818494870507	2.08811030324873	0.0616136172780812	0.322629119364779	0.282200632160615	STOM/FARP1/ERBB2/TNF	4
GO:0001773	myeloid dendritic cell activation	2/263	29/18805	0.0689655172413793	4.93116559590927	2.52315253470383	0.0617842107190214	0.322629119364779	0.282200632160615	DHRS2/BATF	2
GO:0003401	axis elongation	2/263	29/18805	0.0689655172413793	4.93116559590927	2.52315253470383	0.0617842107190214	0.322629119364779	0.282200632160615	MED1/FGFR2	2
GO:0042509	regulation of tyrosine phosphorylation of STAT protein	2/263	29/18805	0.0689655172413793	4.93116559590927	2.52315253470383	0.0617842107190214	0.322629119364779	0.282200632160615	SOCS1/ERBB4	2
GO:0045606	positive regulation of epidermal cell differentiation	2/263	29/18805	0.0689655172413793	4.93116559590927	2.52315253470383	0.0617842107190214	0.322629119364779	0.282200632160615	MED1/SFN	2
GO:0045948	positive regulation of translational initiation	2/263	29/18805	0.0689655172413793	4.93116559590927	2.52315253470383	0.0617842107190214	0.322629119364779	0.282200632160615	SH3BGRL/TNF	2
GO:0060384	innervation	2/263	29/18805	0.0689655172413793	4.93116559590927	2.52315253470383	0.0617842107190214	0.322629119364779	0.282200632160615	SLITRK6/SULF2	2
GO:0048562	embryonic organ morphogenesis	8/263	302/18805	0.0264900662251656	1.89409009644197	1.86547051260345	0.062662763736102	0.326160032843445	0.285289088707085	FRS2/SLITRK6/HPN/MAFB/MESP1/FGFR1/FZD6/FGFR2	8
GO:0010573	vascular endothelial growth factor production	3/263	65/18805	0.0461538461538462	3.30008774495467	2.21228460019555	0.0627573477459011	0.326160032843445	0.285289088707085	SULF2/TNF/NDRG2	3
GO:0040014	regulation of multicellular organism growth	3/263	65/18805	0.0461538461538462	3.30008774495467	2.21228460019555	0.0627573477459011	0.326160032843445	0.285289088707085	NPY1R/GDF15/STC2	3
GO:0032231	regulation of actin filament bundle assembly	4/263	107/18805	0.0373831775700935	2.67296826694147	2.06683935083915	0.0633358102801208	0.327616161496072	0.286562750635331	EVL/LIMCH1/TACSTD2/PHLDB2	4
GO:1990266	neutrophil migration	4/263	107/18805	0.0373831775700935	2.67296826694147	2.06683935083915	0.0633358102801208	0.327616161496072	0.286562750635331	CD99/IL1R1/CXCL8/S100A9	4
GO:1990823	response to leukemia inhibitory factor	4/263	107/18805	0.0373831775700935	2.67296826694147	2.06683935083915	0.0633358102801208	0.327616161496072	0.286562750635331	KLF4/SOCS3/TEX14/NEFH	4
GO:0033002	muscle cell proliferation	7/263	251/18805	0.0278884462151394	1.99407692424219	1.8882643084178	0.0634391794774533	0.327636514699387	0.286580553389321	FRS2/FGFR1/PIM1/ERBB4/FGFR2/TNF/NDRG2	7
GO:0006935	chemotaxis	11/263	466/18805	0.0236051502145923	1.68781311705478	1.7906070665069	0.0639918625603913	0.329519786450617	0.288227833336567	SMOC2/FGFR1/ANXA1/CXCR4/MTUS1/ROBO2/PIK3C2G/EFNA5/S100A7/CXCL8/S100A9	11
GO:0046467	membrane lipid biosynthetic process	5/263	153/18805	0.0326797385620915	2.33666343597008	1.97710524105843	0.0640196671880059	0.329519786450617	0.288227833336567	ASAH1/DEGS2/PGAP3/SPTSSB/HACD4	5
GO:0048010	vascular endothelial growth factor receptor signaling pathway	4/263	108/18805	0.037037037037037	2.64821856076609	2.04581058506614	0.0650831384054103	0.329519786450617	0.288227833336567	ERBB2/FGFR1/ERBB4/FGFR2	4
GO:0010812	negative regulation of cell-substrate adhesion	3/263	66/18805	0.0454545454545455	3.25008641548565	2.18083428943284	0.0650939536674365	0.329519786450617	0.288227833336567	EFNA5/TACSTD2/PHLDB2	3
GO:0031100	animal organ regeneration	3/263	66/18805	0.0454545454545455	3.25008641548565	2.18083428943284	0.0650939536674365	0.329519786450617	0.288227833336567	MED1/SULF2/TNF	3
GO:0045744	negative regulation of G protein-coupled receptor signaling pathway	3/263	66/18805	0.0454545454545455	3.25008641548565	2.18083428943284	0.0650939536674365	0.329519786450617	0.288227833336567	KLK14/RGS2/CXCL8	3
GO:0051965	positive regulation of synapse assembly	3/263	66/18805	0.0454545454545455	3.25008641548565	2.18083428943284	0.0650939536674365	0.329519786450617	0.288227833336567	SLITRK6/EFNA5/CLSTN2	3
GO:0071384	cellular response to corticosteroid stimulus	3/263	66/18805	0.0454545454545455	3.25008641548565	2.18083428943284	0.0650939536674365	0.329519786450617	0.288227833336567	ANXA1/STC1/NR3C1	3
GO:0097192	extrinsic apoptotic signaling pathway in absence of ligand	3/263	66/18805	0.0454545454545455	3.25008641548565	2.18083428943284	0.0650939536674365	0.329519786450617	0.288227833336567	KLF4/FGFR1/TNF	3
GO:1905330	regulation of morphogenesis of an epithelium	3/263	66/18805	0.0454545454545455	3.25008641548565	2.18083428943284	0.0650939536674365	0.329519786450617	0.288227833336567	FGFR1/TACSTD2/TNF	3
GO:0042330	taxis	11/263	468/18805	0.0235042735042735	1.68060024048617	1.77572451070315	0.0655400863795717	0.329519786450617	0.288227833336567	SMOC2/FGFR1/ANXA1/CXCR4/MTUS1/ROBO2/PIK3C2G/EFNA5/S100A7/CXCL8/S100A9	11
GO:0002066	columnar/cuboidal epithelial cell development	2/263	30/18805	0.0666666666666667	4.76679340937896	2.45904889118483	0.0656039392751456	0.329519786450617	0.288227833336567	PGR/FASN	2
GO:0007588	excretion	2/263	30/18805	0.0666666666666667	4.76679340937896	2.45904889118483	0.0656039392751456	0.329519786450617	0.288227833336567	MLLT6/STC1	2
GO:0045672	positive regulation of osteoclast differentiation	2/263	30/18805	0.0666666666666667	4.76679340937896	2.45904889118483	0.0656039392751456	0.329519786450617	0.288227833336567	KLF10/TNF	2
GO:0048668	collateral sprouting	2/263	30/18805	0.0666666666666667	4.76679340937896	2.45904889118483	0.0656039392751456	0.329519786450617	0.288227833336567	SPART/EFNA5	2
GO:0060441	epithelial tube branching involved in lung morphogenesis	2/263	30/18805	0.0666666666666667	4.76679340937896	2.45904889118483	0.0656039392751456	0.329519786450617	0.288227833336567	FGFR2/TNF	2
GO:0097421	liver regeneration	2/263	30/18805	0.0666666666666667	4.76679340937896	2.45904889118483	0.0656039392751456	0.329519786450617	0.288227833336567	SULF2/TNF	2
GO:1903672	positive regulation of sprouting angiogenesis	2/263	30/18805	0.0666666666666667	4.76679340937896	2.45904889118483	0.0656039392751456	0.329519786450617	0.288227833336567	KLF4/S100A1	2
GO:0006631	fatty acid metabolic process	10/263	413/18805	0.0242130750605327	1.73128089929018	1.78965568293416	0.0658110587756057	0.330056984270351	0.288697715176814	GSTP1/ASAH1/GDF15/HACD4/CYP4B1/NUDT8/FADS1/CYP2J2/FADS2/FASN	10
GO:0031099	regeneration	6/263	203/18805	0.0295566502463054	2.11335668396112	1.89944720464389	0.0661523260767763	0.331264307633705	0.289753749477225	KLF4/MED1/ANXA1/SULF2/ERBB4/TNF	6
GO:0043086	negative regulation of catalytic activity	8/263	306/18805	0.0261437908496732	1.86933074877606	1.82598134104742	0.0665622156620845	0.332471317956116	0.290809509963692	GSTP1/GADD45A/ECM1/SFN/TIMP3/RGS2/RPL23/CSTA	8
GO:0002697	regulation of immune effector process	10/263	414/18805	0.0241545893719807	1.72709906136919	1.78162	0.0666513420590611	0.332471317956116	0.290809509963692	LGALS1/IL1R1/STXBP1/CADM1/ANXA1/ASCL2/HPX/TNF/BATF/S100A9	10
GO:0060047	heart contraction	7/263	254/18805	0.0275590551181102	1.97052483458579	1.85466106836241	0.0666960671226078	0.332471317956116	0.290809509963692	JUP/S100A1/CXCR4/RGS2/STC1/TNF/CYP2J2	7
GO:0060761	negative regulation of response to cytokine stimulus	4/263	109/18805	0.036697247706422	2.6239229776398	2.02501867782999	0.0668554937795608	0.332762616319718	0.291064305880804	GSTP1/KLF4/PYDC1/ECM1	4
GO:0002695	negative regulation of leukocyte activation	6/263	204/18805	0.0294117647058824	2.10299709237307	1.88645309821045	0.0674004993338406	0.334969299102572	0.292994470391451	LGALS1/ERBB2/SOCS1/ANXA1/FN1/ASCL2	6
GO:0045667	regulation of osteoblast differentiation	5/263	156/18805	0.032051282051282	2.29172760066296	1.92943508358987	0.0683664941472	0.337172071568842	0.294921214585254	BMPR1B/LTF/FGFR2/TNF/CHRD	5
GO:0071456	cellular response to hypoxia	5/263	156/18805	0.032051282051282	2.29172760066296	1.92943508358987	0.0683664941472	0.337172071568842	0.294921214585254	GNGT1/AK4/FGFR2/STC1/STC2	5
GO:2000377	regulation of reactive oxygen species metabolic process	5/263	156/18805	0.032051282051282	2.29172760066296	1.92943508358987	0.0683664941472	0.337172071568842	0.294921214585254	GSTP1/GADD45A/CYBA/TNF/PRCP	5
GO:0071560	cellular response to transforming growth factor beta stimulus	8/263	308/18805	0.025974025974026	1.85719223742037	1.8064570761162	0.0685670936655081	0.337172071568842	0.294921214585254	LDLRAD4/GDF15/ID1/FMOD/CTSK/FGFR2/CDKN2B/NR3C1	8
GO:0010586	miRNA metabolic process	4/263	110/18805	0.0363636363636364	2.60006913238852	2.00445846763676	0.0686527624151787	0.337172071568842	0.294921214585254	KLF4/XIST/TNF/NR3C1	4
GO:0048144	fibroblast proliferation	4/263	110/18805	0.0363636363636364	2.60006913238852	2.00445846763676	0.0686527624151787	0.337172071568842	0.294921214585254	GSTP1/S100A6/FN1/CDC6	4
GO:0072676	lymphocyte migration	4/263	110/18805	0.0363636363636364	2.60006913238852	2.00445846763676	0.0686527624151787	0.337172071568842	0.294921214585254	CD99/ECM1/ASCL2/S100A7	4
GO:0048839	inner ear development	6/263	205/18805	0.0292682926829268	2.09273856997125	1.87353339239186	0.0686623550903469	0.337172071568842	0.294921214585254	SLITRK6/HPN/MAFB/FGFR1/FZD6/FGFR2	6
GO:0031664	regulation of lipopolysaccharide-mediated signaling pathway	2/263	31/18805	0.0645161290322581	4.61302588004416	2.39771864104011	0.0695004517589926	0.338262907748716	0.295875358650582	LTF/SASH1	2
GO:0033688	regulation of osteoblast proliferation	2/263	31/18805	0.0645161290322581	4.61302588004416	2.39771864104011	0.0695004517589926	0.338262907748716	0.295875358650582	LTF/FGFR2	2
GO:0050951	sensory perception of temperature stimulus	2/263	31/18805	0.0645161290322581	4.61302588004416	2.39771864104011	0.0695004517589926	0.338262907748716	0.295875358650582	CXCR4/LXN	2
GO:0071295	cellular response to vitamin	2/263	31/18805	0.0645161290322581	4.61302588004416	2.39771864104011	0.0695004517589926	0.338262907748716	0.295875358650582	MED1/PIM1	2
GO:1900027	regulation of ruffle assembly	2/263	31/18805	0.0645161290322581	4.61302588004416	2.39771864104011	0.0695004517589926	0.338262907748716	0.295875358650582	EVL/TACSTD2	2
GO:1900745	positive regulation of p38MAPK cascade	2/263	31/18805	0.0645161290322581	4.61302588004416	2.39771864104011	0.0695004517589926	0.338262907748716	0.295875358650582	GADD45A/SASH1	2
GO:0038034	signal transduction in absence of ligand	3/263	68/18805	0.0441176470588235	3.15449563855961	2.11970173044205	0.069885465364432	0.339134916606485	0.296638096531765	KLF4/FGFR1/TNF	3
GO:0150116	regulation of cell-substrate junction organization	3/263	68/18805	0.0441176470588235	3.15449563855961	2.11970173044205	0.069885465364432	0.339134916606485	0.296638096531765	LIMCH1/EFNA5/PHLDB2	3
GO:0001676	long-chain fatty acid metabolic process	4/263	111/18805	0.036036036036036	2.57664508615079	1.98412495290349	0.0704748243400212	0.340490536950689	0.297823844795459	GSTP1/FADS1/CYP2J2/FADS2	4
GO:0032611	interleukin-1 beta production	4/263	111/18805	0.036036036036036	2.57664508615079	1.98412495290349	0.0704748243400212	0.340490536950689	0.297823844795459	GSTP1/PYDC1/NLRP2/TNF	4
GO:0032651	regulation of interleukin-1 beta production	4/263	111/18805	0.036036036036036	2.57664508615079	1.98412495290349	0.0704748243400212	0.340490536950689	0.297823844795459	GSTP1/PYDC1/NLRP2/TNF	4
GO:0008037	cell recognition	5/263	158/18805	0.0316455696202532	2.26271839052799	1.89825814003938	0.071353295781793	0.344230028698401	0.301094742776527	CADM1/CXCR4/PALLD/LY6K/ROBO2	5
GO:0010632	regulation of epithelial cell migration	3/263	69/18805	0.0434782608695652	3.10877831046454	2.08997812095709	0.0723394454960736	0.34695556464274	0.303478743228759	EVL/SASH1/TACSTD2	3
GO:0030199	collagen fibril organization	3/263	69/18805	0.0434782608695652	3.10877831046454	2.08997812095709	0.0723394454960736	0.34695556464274	0.303478743228759	FKBP10/PLOD2/FMOD	3
GO:0044091	membrane biogenesis	3/263	69/18805	0.0434782608695652	3.10877831046454	2.08997812095709	0.0723394454960736	0.34695556464274	0.303478743228759	TLCD1/MAFB/DMKN	3
GO:0048857	neural nucleus development	3/263	69/18805	0.0434782608695652	3.10877831046454	2.08997812095709	0.0723394454960736	0.34695556464274	0.303478743228759	GNB4/S100A1/NDRG2	3
GO:0016032	viral process	10/263	421/18805	0.0237529691211401	1.69838244989749	1.72599314508013	0.0727258125414517	0.347825465399301	0.3042396371738	LGALS1/STOM/LTF/CTSB/MX1/HPN/CXCR4/TMPRSS2/TNF/CXCL8	10
GO:0048754	branching morphogenesis of an epithelial tube	5/263	159/18805	0.0314465408805031	2.24848745725423	1.88284518896512	0.0728732590099459	0.347825465399301	0.3042396371738	MED1/PGR/FGFR2/TACSTD2/TNF	5
GO:0097696	cell surface receptor signaling pathway via STAT	5/263	159/18805	0.0314465408805031	2.24848745725423	1.88284518896512	0.0728732590099459	0.347825465399301	0.3042396371738	GADD45A/SOCS1/SOCS3/ERBB4/TNF	5
GO:0001736	establishment of planar polarity	2/263	32/18805	0.0625	4.46886882129278	2.33894889674392	0.0734708722057401	0.347825465399301	0.3042396371738	ERBB4/FZD6	2
GO:0007164	establishment of tissue polarity	2/263	32/18805	0.0625	4.46886882129278	2.33894889674392	0.0734708722057401	0.347825465399301	0.3042396371738	ERBB4/FZD6	2
GO:0032682	negative regulation of chemokine production	2/263	32/18805	0.0625	4.46886882129278	2.33894889674392	0.0734708722057401	0.347825465399301	0.3042396371738	GSTP1/KLF4	2
GO:0035767	endothelial cell chemotaxis	2/263	32/18805	0.0625	4.46886882129278	2.33894889674392	0.0734708722057401	0.347825465399301	0.3042396371738	SMOC2/FGFR1	2
GO:0071577	zinc ion transmembrane transport	2/263	32/18805	0.0625	4.46886882129278	2.33894889674392	0.0734708722057401	0.347825465399301	0.3042396371738	SLC39A8/SLC30A8	2
GO:0090313	regulation of protein targeting to membrane	2/263	32/18805	0.0625	4.46886882129278	2.33894889674392	0.0734708722057401	0.347825465399301	0.3042396371738	STOM/ERBB2	2
GO:0022408	negative regulation of cell-cell adhesion	6/263	209/18805	0.0287081339712919	2.05268615714883	1.82258164999067	0.0738464282686302	0.348601692185009	0.304918595384572	KLF4/LGALS1/ERBB2/SOCS1/ANXA1/ASCL2	6
GO:0098739	import across plasma membrane	6/263	209/18805	0.0287081339712919	2.05268615714883	1.82258164999067	0.0738464282686302	0.348601692185009	0.304918595384572	SLC39A8/STEAP2/RGS2/SLC30A8/TNF/SLC43A1	6
GO:0030316	osteoclast differentiation	4/263	113/18805	0.0353982300884956	2.53104074834281	1.9441187651433	0.0741928190140774	0.349735820674371	0.305910606822595	KLF10/LTF/MAFB/TNF	4
GO:0061351	neural precursor cell proliferation	5/263	160/18805	0.03125	2.23443441064639	1.8675469298489	0.0744108730032418	0.350262609350974	0.306371383884024	PCM1/FRS2/FGFR1/FZD6/FGFR2	5
GO:0006066	alcohol metabolic process	9/263	368/18805	0.0244565217391304	1.7486877996363	1.72744506324987	0.0746707704519366	0.350984577231285	0.307002882344624	STARD3/ASAH1/DEGS2/SPTSSB/QDPR/FGFR1/EPHX2/IMPA2/ALDH3B2	9
GO:2000401	regulation of lymphocyte migration	3/263	70/18805	0.0428571428571429	3.06436719174362	2.06079	0.0748316082786666	0.351239528886334	0.307225886140335	ECM1/ASCL2/S100A7	3
GO:0071559	response to transforming growth factor beta	8/263	315/18805	0.0253968253968254	1.81592129881103	1.73924113554042	0.0758746668087154	0.355619222196267	0.311056762358718	LDLRAD4/GDF15/ID1/FMOD/CTSK/FGFR2/CDKN2B/NR3C1	8
GO:0030148	sphingolipid biosynthetic process	4/263	114/18805	0.0350877192982456	2.50883863651524	1.92443683272206	0.0760884830495806	0.355619222196267	0.311056762358718	ASAH1/DEGS2/SPTSSB/HACD4	4
GO:0038202	TORC1 signaling	4/263	114/18805	0.0350877192982456	2.50883863651524	1.92443683272206	0.0760884830495806	0.355619222196267	0.311056762358718	PRKACB/SESN3/PIM1/WDR24	4
GO:0003015	heart process	7/263	263/18805	0.026615969581749	1.90309242579768	1.75653372636454	0.0770626243728699	0.359217051332852	0.314203749396805	JUP/S100A1/CXCR4/RGS2/STC1/TNF/CYP2J2	7
GO:0003208	cardiac ventricle morphogenesis	3/263	71/18805	0.0422535211267606	3.02120709045145	2.0321204045806	0.0773614670822493	0.359217051332852	0.314203749396805	MED1/MESP1/FGFR2	3
GO:0046513	ceramide biosynthetic process	3/263	71/18805	0.0422535211267606	3.02120709045145	2.0321204045806	0.0773614670822493	0.359217051332852	0.314203749396805	ASAH1/DEGS2/SPTSSB	3
GO:0006829	zinc ion transport	2/263	33/18805	0.0606060606060606	4.33344855398087	2.28254927237846	0.0775123895288795	0.359217051332852	0.314203749396805	SLC39A8/SLC30A8	2
GO:0009218	pyrimidine ribonucleotide metabolic process	2/263	33/18805	0.0606060606060606	4.33344855398087	2.28254927237846	0.0775123895288795	0.359217051332852	0.314203749396805	ENTPD5/ENTPD4	2
GO:0051497	negative regulation of stress fiber assembly	2/263	33/18805	0.0606060606060606	4.33344855398087	2.28254927237846	0.0775123895288795	0.359217051332852	0.314203749396805	TACSTD2/PHLDB2	2
GO:0033559	unsaturated fatty acid metabolic process	4/263	115/18805	0.0347826086956522	2.48702264837163	1.90496306570999	0.0780084032035079	0.361007989544324	0.315770266072153	GSTP1/FADS1/CYP2J2/FADS2	4
GO:0009306	protein secretion	9/263	372/18805	0.0241935483870968	1.72988470501656	1.69337221084501	0.0786449657973383	0.363443425388821	0.317900518717225	RAB11FIP1/ATP13A2/FAM3B/SLC30A8/SERGEF/EFNA5/TNF/RIMS2/SNCG	9
GO:0036294	cellular response to decreased oxygen levels	5/263	163/18805	0.0306748466257669	2.19330985094124	1.82232353192927	0.0791291337844481	0.36516876165232	0.319409653990593	GNGT1/AK4/FGFR2/STC1/STC2	5
GO:0002065	columnar/cuboidal epithelial cell differentiation	4/263	116/18805	0.0344827586206897	2.46558279795463	1.88569317247746	0.0799524315040976	0.367424353983266	0.32138259921929	KLF4/PGR/FGFR2/FASN	4
GO:0018958	phenol-containing compound metabolic process	4/263	116/18805	0.0344827586206897	2.46558279795463	1.88569317247746	0.0799524315040976	0.367424353983266	0.32138259921929	MED1/CTSB/HPN/CTSK	4
GO:0070555	response to interleukin-1	4/263	116/18805	0.0344827586206897	2.46558279795463	1.88569317247746	0.0799524315040976	0.367424353983266	0.32138259921929	PYDC1/IL1R1/SLC30A8/CXCL8	4
GO:0002366	leukocyte activation involved in immune response	8/263	319/18805	0.0250783699059561	1.79315112578519	1.70158841199013	0.0802536355115765	0.368294887201455	0.322144046372521	LGALS1/TMEM98/SOCS3/STXBP1/ANXA1/ASCL2/TNF/BATF	8
GO:0008016	regulation of heart contraction	6/263	214/18805	0.0280373831775701	2.00472620020611	1.76046723202618	0.0806329356345301	0.368305065249831	0.322152949014947	JUP/S100A1/RGS2/STC1/TNF/CYP2J2	6
GO:0030162	regulation of proteolysis	10/263	430/18805	0.0232558139534884	1.66283491024847	1.65596302270218	0.0810337990589744	0.368305065249831	0.322152949014947	PRKACB/PLAT/TMEM98/ATP13A2/HPN/ECM1/TIMP3/TNF/RPL23/CSTA	10
GO:0046879	hormone secretion	8/263	320/18805	0.025	1.78754752851711	1.69225864649111	0.0813714745197464	0.368305065249831	0.322152949014947	RAB11FIP1/FAM3B/FGFR1/ANXA1/SLC30A8/EFNA5/TNF/RIMS2	8
GO:0007260	tyrosine phosphorylation of STAT protein	2/263	34/18805	0.0588235294117647	4.20599418474614	2.22834890160816	0.0816222562795002	0.368305065249831	0.322152949014947	SOCS1/ERBB4	2
GO:0010804	negative regulation of tumor necrosis factor-mediated signaling pathway	2/263	34/18805	0.0588235294117647	4.20599418474614	2.22834890160816	0.0816222562795002	0.368305065249831	0.322152949014947	GSTP1/PYDC1	2
GO:0031069	hair follicle morphogenesis	2/263	34/18805	0.0588235294117647	4.20599418474614	2.22834890160816	0.0816222562795002	0.368305065249831	0.322152949014947	SNAI1/FGFR2	2
GO:0032107	regulation of response to nutrient levels	2/263	34/18805	0.0588235294117647	4.20599418474614	2.22834890160816	0.0816222562795002	0.368305065249831	0.322152949014947	MED1/GDF15	2
GO:0033146	regulation of intracellular estrogen receptor signaling pathway	2/263	34/18805	0.0588235294117647	4.20599418474614	2.22834890160816	0.0816222562795002	0.368305065249831	0.322152949014947	MED1/LBH	2
GO:0045671	negative regulation of osteoclast differentiation	2/263	34/18805	0.0588235294117647	4.20599418474614	2.22834890160816	0.0816222562795002	0.368305065249831	0.322152949014947	LTF/MAFB	2
GO:0045684	positive regulation of epidermis development	2/263	34/18805	0.0588235294117647	4.20599418474614	2.22834890160816	0.0816222562795002	0.368305065249831	0.322152949014947	MED1/SFN	2
GO:0050891	multicellular organismal-level water homeostasis	2/263	34/18805	0.0588235294117647	4.20599418474614	2.22834890160816	0.0816222562795002	0.368305065249831	0.322152949014947	PRKACB/MLLT6	2
GO:0070498	interleukin-1-mediated signaling pathway	2/263	34/18805	0.0588235294117647	4.20599418474614	2.22834890160816	0.0816222562795002	0.368305065249831	0.322152949014947	PYDC1/IL1R1	2
GO:0035592	establishment of protein localization to extracellular region	9/263	375/18805	0.024	1.71604562737643	1.66808574262178	0.0817089537777319	0.368305065249831	0.322152949014947	RAB11FIP1/ATP13A2/FAM3B/SLC30A8/SERGEF/EFNA5/TNF/RIMS2/SNCG	9
GO:0006487	protein N-linked glycosylation	3/263	73/18805	0.0410958904109589	2.93843429345278	1.97626485345319	0.0825322841601794	0.369991668445975	0.323628204841491	TUSC3/SLC39A8/ENTPD5	3
GO:0061035	regulation of cartilage development	3/263	73/18805	0.0410958904109589	2.93843429345278	1.97626485345319	0.0825322841601794	0.369991668445975	0.323628204841491	BMPR1B/MBOAT2/CTSK	3
GO:0070830	bicellular tight junction assembly	3/263	73/18805	0.0410958904109589	2.93843429345278	1.97626485345319	0.0825322841601794	0.369991668445975	0.323628204841491	SNAI1/RAMP2/TNF	3
GO:0071901	negative regulation of protein serine/threonine kinase activity	3/263	73/18805	0.0410958904109589	2.93843429345278	1.97626485345319	0.0825322841601794	0.369991668445975	0.323628204841491	GSTP1/GADD45A/RGS2	3
GO:0030098	lymphocyte differentiation	10/263	432/18805	0.0231481481481481	1.65513660047881	1.64062152737575	0.0829564347021935	0.371387842858326	0.324849425364139	LGALS1/TMEM98/ERBB2/MAFB/SOCS1/SOCS3/ANXA1/ASCL2/RHOH/BATF	10
GO:0007159	leukocyte cell-cell adhesion	10/263	433/18805	0.023094688221709	1.65131411410357	1.63298022835513	0.083928190815465	0.374441999434721	0.327520867167883	KLF4/LGALS1/ERBB2/SLC39A8/SOCS1/ANXA1/ASCL2/RHOH/TNF/S100A9	10
GO:0051017	actin filament bundle assembly	5/263	166/18805	0.0301204819277108	2.15367172110495	1.77807343819421	0.0840043749042689	0.374441999434721	0.327520867167883	EVL/PDLIM1/LIMCH1/TACSTD2/PHLDB2	5
GO:1903522	regulation of blood circulation	7/263	269/18805	0.0260223048327138	1.86064426760145	1.69323219366834	0.0844697468570799	0.374441999434721	0.327520867167883	ADD3/JUP/S100A1/RGS2/STC1/TNF/CYP2J2	7
GO:0002263	cell activation involved in immune response	8/263	323/18805	0.0247678018575851	1.77094491989311	1.66446564779381	0.0847803807551722	0.374441999434721	0.327520867167883	LGALS1/TMEM98/SOCS3/STXBP1/ANXA1/ASCL2/TNF/BATF	8
GO:0007405	neuroblast proliferation	3/263	74/18805	0.0405405405405405	2.89872572191964	1.94904703091806	0.0851722286808801	0.374441999434721	0.327520867167883	FRS2/FGFR1/FGFR2	3
GO:0032732	positive regulation of interleukin-1 production	3/263	74/18805	0.0405405405405405	2.89872572191964	1.94904703091806	0.0851722286808801	0.374441999434721	0.327520867167883	PYDC1/NLRP2/TNF	3
GO:0050772	positive regulation of axonogenesis	3/263	74/18805	0.0405405405405405	2.89872572191964	1.94904703091806	0.0851722286808801	0.374441999434721	0.327520867167883	ROBO2/FN1/EFNA5	3
GO:0051348	negative regulation of transferase activity	5/263	167/18805	0.029940119760479	2.14077548325402	1.76353250165699	0.0856640569612881	0.374441999434721	0.327520867167883	GSTP1/GADD45A/SFN/RGS2/RPL23	5
GO:0016486	peptide hormone processing	2/263	35/18805	0.0571428571428571	4.08582292232482	2.17619392584503	0.0857977874273792	0.374441999434721	0.327520867167883	SLC30A8/BACE2	2
GO:0021772	olfactory bulb development	2/263	35/18805	0.0571428571428571	4.08582292232482	2.17619392584503	0.0857977874273792	0.374441999434721	0.327520867167883	ERBB4/ROBO2	2
GO:0031338	regulation of vesicle fusion	2/263	35/18805	0.0571428571428571	4.08582292232482	2.17619392584503	0.0857977874273792	0.374441999434721	0.327520867167883	STXBP1/ANXA1	2
GO:0034063	stress granule assembly	2/263	35/18805	0.0571428571428571	4.08582292232482	2.17619392584503	0.0857977874273792	0.374441999434721	0.327520867167883	GRB7/G3BP2	2
GO:0043407	negative regulation of MAP kinase activity	2/263	35/18805	0.0571428571428571	4.08582292232482	2.17619392584503	0.0857977874273792	0.374441999434721	0.327520867167883	GSTP1/RGS2	2
GO:0051353	positive regulation of oxidoreductase activity	2/263	35/18805	0.0571428571428571	4.08582292232482	2.17619392584503	0.0857977874273792	0.374441999434721	0.327520867167883	S100A1/TNF	2
GO:0061436	establishment of skin barrier	2/263	35/18805	0.0571428571428571	4.08582292232482	2.17619392584503	0.0857977874273792	0.374441999434721	0.327520867167883	KLF4/SFN	2
GO:0099633	protein localization to postsynaptic specialization membrane	2/263	35/18805	0.0571428571428571	4.08582292232482	2.17619392584503	0.0857977874273792	0.374441999434721	0.327520867167883	ERBB2/ERBB4	2
GO:0099645	neurotransmitter receptor localization to postsynaptic specialization membrane	2/263	35/18805	0.0571428571428571	4.08582292232482	2.17619392584503	0.0857977874273792	0.374441999434721	0.327520867167883	ERBB2/ERBB4	2
GO:1904893	negative regulation of receptor signaling pathway via STAT	2/263	35/18805	0.0571428571428571	4.08582292232482	2.17619392584503	0.0857977874273792	0.374441999434721	0.327520867167883	SOCS1/SOCS3	2
GO:2000406	positive regulation of T cell migration	2/263	35/18805	0.0571428571428571	4.08582292232482	2.17619392584503	0.0857977874273792	0.374441999434721	0.327520867167883	ASCL2/S100A7	2
GO:0001822	kidney development	8/263	325/18805	0.0246153846153846	1.76004679730915	1.64609819044803	0.0870990947033877	0.378872567800094	0.331396243314961	GFRA1/OVOL1/FGFR1/SULF2/ERBB4/ROBO2/FGFR2/TACSTD2	8
GO:0060326	cell chemotaxis	8/263	325/18805	0.0246153846153846	1.76004679730915	1.64609819044803	0.0870990947033877	0.378872567800094	0.331396243314961	SMOC2/FGFR1/ANXA1/CXCR4/MTUS1/S100A7/CXCL8/S100A9	8
GO:0009566	fertilization	6/263	219/18805	0.0273972602739726	1.95895619563519	1.70001427257297	0.0877574617058735	0.378872567800094	0.331396243314961	PLAT/KLK14/NELL2/STXBP1/LY6K/TRIM36	6
GO:0060348	bone development	6/263	219/18805	0.0273972602739726	1.95895619563519	1.70001427257297	0.0877574617058735	0.378872567800094	0.331396243314961	BMPR1B/LTF/ECM1/SULF2/FGFR2/STC1	6
GO:0071356	cellular response to tumor necrosis factor	6/263	219/18805	0.0273972602739726	1.95895619563519	1.70001427257297	0.0877574617058735	0.378872567800094	0.331396243314961	GSTP1/PYDC1/ASAH1/CTSK/TNF/CXCL8	6
GO:0003281	ventricular septum development	3/263	75/18805	0.04	2.86007604562738	1.92228222454543	0.0878478427311901	0.378872567800094	0.331396243314961	FRS2/ROBO2/FGFR2	3
GO:0021879	forebrain neuron differentiation	3/263	75/18805	0.04	2.86007604562738	1.92228222454543	0.0878478427311901	0.378872567800094	0.331396243314961	ERBB4/ROBO2/FGFR2	3
GO:0042698	ovulation cycle	3/263	75/18805	0.04	2.86007604562738	1.92228222454543	0.0878478427311901	0.378872567800094	0.331396243314961	BMPR1B/PGR/ROBO2	3
GO:2000379	positive regulation of reactive oxygen species metabolic process	3/263	75/18805	0.04	2.86007604562738	1.92228222454543	0.0878478427311901	0.378872567800094	0.331396243314961	GSTP1/GADD45A/CYBA	3
GO:0051092	positive regulation of NF-kappaB transcription factor activity	4/263	120/18805	0.0333333333333333	2.38339670468948	1.81057081624854	0.0879664868669857	0.378888332322507	0.331410032393267	LTF/RIPK4/TNF/S100A9	4
GO:0009101	glycoprotein biosynthetic process	8/263	326/18805	0.0245398773006135	1.75464788075299	1.63696212541619	0.0882722658799346	0.379425343199011	0.331879750716043	BMPR1B/GALNT3/TUSC3/GALNT7/SLC39A8/BACE2/PHLDA1/ENTPD5	8
GO:0003007	heart morphogenesis	7/263	272/18805	0.0257352941176471	1.84012245582644	1.66218320382976	0.0883214683561886	0.379425343199011	0.331879750716043	NPY1R/MED1/SNAI1/MESP1/PIM1/ROBO2/FGFR2	7
GO:0007156	homophilic cell adhesion via plasma membrane adhesion molecules	5/263	169/18805	0.029585798816568	2.11544086215043	1.73475544209537	0.0890349208367641	0.380417218016218	0.332747334215607	CELSR2/CADM1/PALLD/ROBO2/CLSTN2	5
GO:0007416	synapse assembly	7/263	273/18805	0.0256410256410256	1.83338208053037	1.65192012018905	0.0896272325111883	0.380417218016218	0.332747334215607	FARP1/SLITRK6/FGFR1/ERBB4/ROBO2/EFNA5/CLSTN2	7
GO:0042303	molting cycle	4/263	121/18805	0.0330578512396694	2.36369921126229	1.79226016533887	0.0900286582333288	0.380417218016218	0.332747334215607	SNAI1/FZD6/FGFR2/TNF	4
GO:0042633	hair cycle	4/263	121/18805	0.0330578512396694	2.36369921126229	1.79226016533887	0.0900286582333288	0.380417218016218	0.332747334215607	SNAI1/FZD6/FGFR2/TNF	4
GO:0021884	forebrain neuron development	2/263	36/18805	0.0555555555555556	3.97232784114913	2.12594536733209	0.090036359163509	0.380417218016218	0.332747334215607	ROBO2/FGFR2	2
GO:0032232	negative regulation of actin filament bundle assembly	2/263	36/18805	0.0555555555555556	3.97232784114913	2.12594536733209	0.090036359163509	0.380417218016218	0.332747334215607	TACSTD2/PHLDB2	2
GO:0033687	osteoblast proliferation	2/263	36/18805	0.0555555555555556	3.97232784114913	2.12594536733209	0.090036359163509	0.380417218016218	0.332747334215607	LTF/FGFR2	2
GO:0086004	regulation of cardiac muscle cell contraction	2/263	36/18805	0.0555555555555556	3.97232784114913	2.12594536733209	0.090036359163509	0.380417218016218	0.332747334215607	JUP/STC1	2
GO:1901099	negative regulation of signal transduction in absence of ligand	2/263	36/18805	0.0555555555555556	3.97232784114913	2.12594536733209	0.090036359163509	0.380417218016218	0.332747334215607	KLF4/TNF	2
GO:1902882	regulation of response to oxidative stress	2/263	36/18805	0.0555555555555556	3.97232784114913	2.12594536733209	0.090036359163509	0.380417218016218	0.332747334215607	SESN3/FADS2	2
GO:2001240	negative regulation of extrinsic apoptotic signaling pathway in absence of ligand	2/263	36/18805	0.0555555555555556	3.97232784114913	2.12594536733209	0.090036359163509	0.380417218016218	0.332747334215607	KLF4/TNF	2
GO:0071692	protein localization to extracellular region	9/263	383/18805	0.0234986945169713	1.68020133228762	1.60174428595308	0.0902289401622361	0.380417218016218	0.332747334215607	RAB11FIP1/ATP13A2/FAM3B/SLC30A8/SERGEF/EFNA5/TNF/RIMS2/SNCG	9
GO:0045123	cellular extravasation	3/263	76/18805	0.0394736842105263	2.82244346607965	1.89595608338223	0.090558602235898	0.380417218016218	0.332747334215607	CD99/IL1R1/TNF	3
GO:0048525	negative regulation of viral process	3/263	76/18805	0.0394736842105263	2.82244346607965	1.89595608338223	0.090558602235898	0.380417218016218	0.332747334215607	LTF/MX1/TNF	3
GO:1902893	regulation of miRNA transcription	3/263	76/18805	0.0394736842105263	2.82244346607965	1.89595608338223	0.090558602235898	0.380417218016218	0.332747334215607	KLF4/TNF/NR3C1	3
GO:2000242	negative regulation of reproductive process	3/263	76/18805	0.0394736842105263	2.82244346607965	1.89595608338223	0.090558602235898	0.380417218016218	0.332747334215607	PLAT/SNAI1/OVOL1	3
GO:0023061	signal release	11/263	497/18805	0.0221327967806841	1.58253704737933	1.56749440685732	0.0907412676867589	0.380417218016218	0.332747334215607	RAB11FIP1/FBXL20/FAM3B/FGFR1/STXBP1/ANXA1/SLC30A8/EFNA5/TNF/RIMS2/SNCG	11
GO:0006633	fatty acid biosynthetic process	5/263	170/18805	0.0294117647058824	2.10299709237307	1.72051647997515	0.0907459585313346	0.380417218016218	0.332747334215607	GSTP1/HACD4/FADS1/FADS2/FASN	5
GO:0061572	actin filament bundle organization	5/263	170/18805	0.0294117647058824	2.10299709237307	1.72051647997515	0.0907459585313346	0.380417218016218	0.332747334215607	EVL/PDLIM1/LIMCH1/TACSTD2/PHLDB2	5
GO:0071621	granulocyte chemotaxis	4/263	122/18805	0.0327868852459016	2.34432462756342	1.77413012523766	0.0921139448369347	0.385661306528208	0.337334288722701	ANXA1/S100A7/CXCL8/S100A9	4
GO:0043409	negative regulation of MAPK cascade	5/263	171/18805	0.0292397660818713	2.0906988637627	1.7063753842485	0.0924739660541751	0.38667730729506	0.338222974961704	GSTP1/DUSP5/DUSP4/RGS2/NDRG2	5
GO:0045785	positive regulation of cell adhesion	11/263	499/18805	0.0220440881763527	1.5761942135221	1.55362837142203	0.0926707518162909	0.387009033250543	0.338513132510179	LGALS1/ERBB2/JUP/SFN/FBLN2/SOCS1/ANXA1/FN1/RHOH/TNF/CHRD	11
GO:0032007	negative regulation of TOR signaling	3/263	77/18805	0.038961038961039	2.78578835613056	1.8700548991031	0.0933039771020372	0.387575023004506	0.339008198382346	PRKACB/SESN3/WDR24	3
GO:0061614	miRNA transcription	3/263	77/18805	0.038961038961039	2.78578835613056	1.8700548991031	0.0933039771020372	0.387575023004506	0.339008198382346	KLF4/TNF/NR3C1	3
GO:1900076	regulation of cellular response to insulin stimulus	3/263	77/18805	0.038961038961039	2.78578835613056	1.8700548991031	0.0933039771020372	0.387575023004506	0.339008198382346	GRB14/SOCS1/SOCS3	3
GO:0009612	response to mechanical stimulus	6/263	223/18805	0.0269058295964126	1.92381796791079	1.65278862654335	0.0936980102771793	0.387575023004506	0.339008198382346	GADD45A/SLITRK6/HPN/JUP/CXCR4/TNF	6
GO:0003205	cardiac chamber development	5/263	172/18805	0.0290697674418605	2.07854363781059	1.69233080529154	0.0942188645132379	0.387575023004506	0.339008198382346	MED1/FRS2/MESP1/ROBO2/FGFR2	5
GO:0009914	hormone transport	8/263	331/18805	0.0241691842900302	1.72814262575672	1.59174938208514	0.094275922941164	0.387575023004506	0.339008198382346	RAB11FIP1/FAM3B/FGFR1/ANXA1/SLC30A8/EFNA5/TNF/RIMS2	8
GO:0055074	calcium ion homeostasis	8/263	331/18805	0.0241691842900302	1.72814262575672	1.59174938208514	0.094275922941164	0.387575023004506	0.339008198382346	CYBA/ATP13A2/FGFR1/ATP13A1/ITPR2/ANXA6/STC1/STC2	8
GO:1904951	positive regulation of establishment of protein localization	8/263	331/18805	0.0241691842900302	1.72814262575672	1.59174938208514	0.094275922941164	0.387575023004506	0.339008198382346	PCM1/STOM/ERBB2/ATP13A2/JUP/SFN/SLC30A8/TNF	8
GO:0021988	olfactory lobe development	2/263	37/18805	0.0540540540540541	3.86496762922618	2.07747731924381	0.0943354077237068	0.387575023004506	0.339008198382346	ERBB4/ROBO2	2
GO:0032717	negative regulation of interleukin-8 production	2/263	37/18805	0.0540540540540541	3.86496762922618	2.07747731924381	0.0943354077237068	0.387575023004506	0.339008198382346	KLF4/ANXA1	2
GO:0046688	response to copper ion	2/263	37/18805	0.0540540540540541	3.86496762922618	2.07747731924381	0.0943354077237068	0.387575023004506	0.339008198382346	MT1E/MT1G	2
GO:0060218	hematopoietic stem cell differentiation	2/263	37/18805	0.0540540540540541	3.86496762922618	2.07747731924381	0.0943354077237068	0.387575023004506	0.339008198382346	MED1/BATF	2
GO:0097484	dendrite extension	2/263	37/18805	0.0540540540540541	3.86496762922618	2.07747731924381	0.0943354077237068	0.387575023004506	0.339008198382346	CXCR4/RIMS2	2
GO:0050878	regulation of body fluid levels	9/263	388/18805	0.0231958762886598	1.6585492532633	1.5610592517827	0.0958115353147994	0.391825380407221	0.3427259457088	PRKACB/MED1/PLAT/MLLT6/CYBA/CELSR2/STXBP1/ERBB4/FZD6	9
GO:0006665	sphingolipid metabolic process	5/263	173/18805	0.0289017341040462	2.06652893470186	1.67838142016065	0.0959805723574457	0.391825380407221	0.3427259457088	ASAH1/DEGS2/SPTSSB/HACD4/ALDH3B2	5
GO:0051250	negative regulation of lymphocyte activation	5/263	173/18805	0.0289017341040462	2.06652893470186	1.67838142016065	0.0959805723574457	0.391825380407221	0.3427259457088	LGALS1/ERBB2/SOCS1/ANXA1/ASCL2	5
GO:0007585	respiratory gaseous exchange by respiratory system	3/263	78/18805	0.0384615384615385	2.75007312079555	1.84456556919622	0.0960834316749726	0.391825380407221	0.3427259457088	TRAF4/NEK10/MAFB	3
GO:0061045	negative regulation of wound healing	3/263	78/18805	0.0384615384615385	2.75007312079555	1.84456556919622	0.0960834316749726	0.391825380407221	0.3427259457088	PLAT/TNF/PHLDB2	3
GO:0070373	negative regulation of ERK1 and ERK2 cascade	3/263	78/18805	0.0384615384615385	2.75007312079555	1.84456556919622	0.0960834316749726	0.391825380407221	0.3427259457088	GSTP1/DUSP4/NDRG2	3
GO:0030856	regulation of epithelial cell differentiation	5/263	174/18805	0.028735632183908	2.05465233162886	1.66452593191101	0.0977590054177651	0.397880001183911	0.348021865103921	MED1/SFN/MESP1/TNF/CDKN2B	5
GO:0042326	negative regulation of phosphorylation	6/263	226/18805	0.0265486725663717	1.89828056125711	1.61800463365978	0.0982924259412198	0.397880001183911	0.348021865103921	GSTP1/GADD45A/SFN/SOCS1/RGS2/CDKN2B	6
GO:0001952	regulation of cell-matrix adhesion	4/263	125/18805	0.032	2.2880608365019	1.72078912757497	0.0985066563460229	0.397880001183911	0.348021865103921	JUP/LIMCH1/EFNA5/PHLDB2	4
GO:0006904	vesicle docking involved in exocytosis	2/263	38/18805	0.0526315789473684	3.76325795477286	2.03067539836769	0.098692428232955	0.397880001183911	0.348021865103921	STXBP1/RIMS2	2
GO:0008207	C21-steroid hormone metabolic process	2/263	38/18805	0.0526315789473684	3.76325795477286	2.03067539836769	0.098692428232955	0.397880001183911	0.348021865103921	STARD3/DHRS2	2
GO:0043372	positive regulation of CD4-positive, alpha-beta T cell differentiation	2/263	38/18805	0.0526315789473684	3.76325795477286	2.03067539836769	0.098692428232955	0.397880001183911	0.348021865103921	SOCS1/ANXA1	2
GO:0070316	regulation of G0 to G1 transition	2/263	38/18805	0.0526315789473684	3.76325795477286	2.03067539836769	0.098692428232955	0.397880001183911	0.348021865103921	MED1/CDKN2B	2
GO:1902410	mitotic cytokinetic process	2/263	38/18805	0.0526315789473684	3.76325795477286	2.03067539836769	0.098692428232955	0.397880001183911	0.348021865103921	IQGAP2/SPART	2
GO:0051145	smooth muscle cell differentiation	3/263	79/18805	0.0379746835443038	2.71526206863359	1.81947556270345	0.0988964251804623	0.397880001183911	0.348021865103921	MESP1/FGFR2/RAMP2	3
GO:0055117	regulation of cardiac muscle contraction	3/263	79/18805	0.0379746835443038	2.71526206863359	1.81947556270345	0.0988964251804623	0.397880001183911	0.348021865103921	JUP/RGS2/STC1	3
GO:0120192	tight junction assembly	3/263	79/18805	0.0379746835443038	2.71526206863359	1.81947556270345	0.0988964251804623	0.397880001183911	0.348021865103921	SNAI1/RAMP2/TNF	3
GO:0098742	cell-cell adhesion via plasma-membrane adhesion molecules	7/263	280/18805	0.025	1.78754752851711	1.58125309080152	0.099071640626714	0.398098848615881	0.348213288877975	KLF4/CELSR2/CADM1/PALLD/ROBO2/EFNA5/CLSTN2	7
GO:0010975	regulation of neuron projection development	10/263	448/18805	0.0223214285714286	1.59602457903313	1.52064216929938	0.0993394978603555	0.398688971315312	0.348729463608761	PMP22/KLF4/FGFR1/KIF13B/RGS2/SPART/ROBO2/FN1/EFNA5/S100A9	10
GO:0006937	regulation of muscle contraction	5/263	175/18805	0.0285714285714286	2.04291146116241	1.65076306893643	0.0995540769485792	0.399064091904584	0.349057578032027	TNNT1/JUP/RGS2/ANXA6/STC1	5
GO:0050866	negative regulation of cell activation	6/263	227/18805	0.026431718061674	1.88991809182426	1.60652760492163	0.0998501500838587	0.39976457415105	0.349670283212387	LGALS1/ERBB2/SOCS1/ANXA1/FN1/ASCL2	6
GO:0072001	renal system development	8/263	336/18805	0.0238095238095238	1.70242621763534	1.54729587651351	0.100508223138348	0.401910916554438	0.351547668565147	GFRA1/OVOL1/FGFR1/SULF2/ERBB4/ROBO2/FGFR2/TACSTD2	8
GO:0010717	regulation of epithelial to mesenchymal transition	4/263	126/18805	0.0317460317460317	2.26990162351379	1.70334745929881	0.100682543001886	0.40211997477723	0.351730529810736	SNAI1/LDLRAD4/HPN/PHLDB2	4
GO:0140962	multicellular organismal-level chemical homeostasis	3/263	80/18805	0.0375	2.68132129277567	1.7947728883075	0.101742412153029	0.40586107511408	0.355002834809472	PRKACB/CYBRD1/MLLT6	3
GO:0048545	response to steroid hormone	8/263	338/18805	0.0236686390532544	1.69235268972034	1.52972113275896	0.103064776139373	0.409808067446992	0.358455231585293	MED1/PGR/ANXA1/STC1/TNF/LBH/NR3C1/SCGB2A2	8
GO:0003180	aortic valve morphogenesis	2/263	39/18805	0.0512820512820513	3.66676416106074	1.98543541644684	0.103104973570123	0.409808067446992	0.358455231585293	SNAI1/ROBO2	2
GO:0140448	signaling receptor ligand precursor processing	2/263	39/18805	0.0512820512820513	3.66676416106074	1.98543541644684	0.103104973570123	0.409808067446992	0.358455231585293	SLC30A8/BACE2	2
GO:0072089	stem cell proliferation	4/263	128/18805	0.03125	2.23443441064639	1.66895317484868	0.10510060620008	0.416944802735579	0.364697666285446	SFN/OVOL1/FGFR1/PIM1	4
GO:0002460	adaptive immune response based on somatic recombination of immune receptors built from immunoglobulin superfamily domains	9/263	396/18805	0.0227272727272727	1.62504320774283	1.49715664199506	0.105153605788548	0.416944802735579	0.364697666285446	LGALS1/TMEM98/IL1R1/SOCS3/ANXA1/ASCL2/HPX/TNF/BATF	9
GO:0051962	positive regulation of nervous system development	7/263	285/18805	0.0245614035087719	1.75618704556067	1.53198981859389	0.106140373204861	0.41949405631645	0.366927474225522	SLITRK6/CXCR4/ROBO2/FN1/EFNA5/TNF/CLSTN2	7
GO:0002285	lymphocyte activation involved in immune response	6/263	231/18805	0.025974025974026	1.85719223742037	1.56119160027189	0.106211052014708	0.41949405631645	0.366927474225522	LGALS1/TMEM98/SOCS3/ANXA1/ASCL2/BATF	6
GO:0071453	cellular response to oxygen levels	5/263	179/18805	0.0279329608938547	1.99725980839901	1.59661328924195	0.106898925022964	0.41949405631645	0.366927474225522	GNGT1/AK4/FGFR2/STC1/STC2	5
GO:0003206	cardiac chamber morphogenesis	4/263	129/18805	0.0310077519379845	2.21711321366463	1.65199453789077	0.107342374508541	0.41949405631645	0.366927474225522	MED1/MESP1/ROBO2/FGFR2	4
GO:0003151	outflow tract morphogenesis	3/263	82/18805	0.0365853658536585	2.61592321246406	1.74648409220661	0.107531163658316	0.41949405631645	0.366927474225522	NPY1R/ROBO2/FGFR2	3
GO:0030500	regulation of bone mineralization	3/263	82/18805	0.0365853658536585	2.61592321246406	1.74648409220661	0.107531163658316	0.41949405631645	0.366927474225522	BMPR1B/LTF/ECM1	3
GO:0043297	apical junction assembly	3/263	82/18805	0.0365853658536585	2.61592321246406	1.74648409220661	0.107531163658316	0.41949405631645	0.366927474225522	SNAI1/RAMP2/TNF	3
GO:0007340	acrosome reaction	2/263	40/18805	0.05	3.57509505703422	1.94166223453334	0.107570653252735	0.41949405631645	0.366927474225522	STXBP1/TRIM36	2
GO:0016266	O-glycan processing	2/263	40/18805	0.05	3.57509505703422	1.94166223453334	0.107570653252735	0.41949405631645	0.366927474225522	GALNT3/GALNT7	2
GO:0035886	vascular associated smooth muscle cell differentiation	2/263	40/18805	0.05	3.57509505703422	1.94166223453334	0.107570653252735	0.41949405631645	0.366927474225522	MESP1/RAMP2	2
GO:0045023	G0 to G1 transition	2/263	40/18805	0.05	3.57509505703422	1.94166223453334	0.107570653252735	0.41949405631645	0.366927474225522	MED1/CDKN2B	2
GO:0045730	respiratory burst	2/263	40/18805	0.05	3.57509505703422	1.94166223453334	0.107570653252735	0.41949405631645	0.366927474225522	CYBA/S100A9	2
GO:0051702	biological process involved in interaction with symbiont	2/263	40/18805	0.05	3.57509505703422	1.94166223453334	0.107570653252735	0.41949405631645	0.366927474225522	LTF/FN1	2
GO:0042594	response to starvation	6/263	232/18805	0.0258620689655172	1.84918709846598	1.54999771381849	0.107833525250389	0.41949405631645	0.366927474225522	DNAJC15/KLF10/SESN3/CTSK/WDR24/FADS1	6
GO:0043583	ear development	6/263	232/18805	0.0258620689655172	1.84918709846598	1.54999771381849	0.107833525250389	0.41949405631645	0.366927474225522	SLITRK6/HPN/MAFB/FGFR1/FZD6/FGFR2	6
GO:0048588	developmental cell growth	6/263	232/18805	0.0258620689655172	1.84918709846598	1.54999771381849	0.107833525250389	0.41949405631645	0.366927474225522	CXCR4/RGS2/SPART/FN1/EFNA5/RIMS2	6
GO:0002761	regulation of myeloid leukocyte differentiation	4/263	130/18805	0.0307692307692308	2.20005849663644	1.63519102290803	0.109605689048066	0.425885312987473	0.372517845846083	KLF10/LTF/MAFB/TNF	4
GO:0009100	glycoprotein metabolic process	9/263	400/18805	0.0225	1.6087927756654	1.46573777986184	0.110012484444728	0.426962469075829	0.373460024065049	BMPR1B/GALNT3/TUSC3/GALNT7/SLC39A8/SULF2/BACE2/PHLDA1/ENTPD5	9
GO:0014823	response to activity	3/263	83/18805	0.036144578313253	2.58440606532594	1.72287642807259	0.11047281747409	0.428244627737795	0.374581516091712	CXCR4/FN1/TNF	3
GO:0030595	leukocyte chemotaxis	6/263	234/18805	0.0256410256410256	1.83338208053037	1.52777411954122	0.111116792006563	0.430234817463719	0.376322316177834	ANXA1/CXCR4/MTUS1/S100A7/CXCL8/S100A9	6
GO:0046718	symbiont entry into host cell	4/263	131/18805	0.0305343511450382	2.18326415696746	1.61853981394141	0.111890336750808	0.430451166742472	0.376511554840951	LGALS1/CTSB/CXCR4/TMPRSS2	4
GO:0003203	endocardial cushion morphogenesis	2/263	41/18805	0.0487804878048781	3.48789761661875	1.89926877124984	0.112087132341439	0.430451166742472	0.376511554840951	SNAI1/ROBO2	2
GO:0009072	aromatic amino acid metabolic process	2/263	41/18805	0.0487804878048781	3.48789761661875	1.89926877124984	0.112087132341439	0.430451166742472	0.376511554840951	QDPR/KYNU	2
GO:0035337	fatty-acyl-CoA metabolic process	2/263	41/18805	0.0487804878048781	3.48789761661875	1.89926877124984	0.112087132341439	0.430451166742472	0.376511554840951	NUDT8/FASN	2
GO:0050919	negative chemotaxis	2/263	41/18805	0.0487804878048781	3.48789761661875	1.89926877124984	0.112087132341439	0.430451166742472	0.376511554840951	ROBO2/EFNA5	2
GO:0060392	negative regulation of SMAD protein signal transduction	2/263	41/18805	0.0487804878048781	3.48789761661875	1.89926877124984	0.112087132341439	0.430451166742472	0.376511554840951	LDLRAD4/GDF15	2
GO:1904994	regulation of leukocyte adhesion to vascular endothelial cell	2/263	41/18805	0.0487804878048781	3.48789761661875	1.89926877124984	0.112087132341439	0.430451166742472	0.376511554840951	KLF4/TNF	2
GO:2000736	regulation of stem cell differentiation	3/263	84/18805	0.0357142857142857	2.55363932645301	1.69961296100256	0.113445244089101	0.435159580062383	0.380629959335774	CDK12/TACSTD2/LBH	3
GO:0003014	renal system process	4/263	132/18805	0.0303030303030303	2.16672427699044	1.6020381681055	0.114196101180725	0.437530410919175	0.382703702610558	PRKACB/MLLT6/SULF2/STC1	4
GO:0007015	actin filament organization	10/263	463/18805	0.0215982721382289	1.54431751923724	1.41235597216594	0.116307204216314	0.440284959391667	0.385113080046125	EVL/ADD3/PDLIM1/IQGAP2/RND3/INF2/LIMCH1/RHOH/TACSTD2/PHLDB2	10
GO:0032956	regulation of actin cytoskeleton organization	8/263	348/18805	0.0229885057471264	1.64372186530309	1.44355067473663	0.116386773797536	0.440284959391667	0.385113080046125	EVL/ADD3/IQGAP2/RND3/LIMCH1/EFNA5/TACSTD2/PHLDB2	8
GO:0017157	regulation of exocytosis	5/263	184/18805	0.0271739130434783	1.94298644404034	1.53086737652912	0.116442917454313	0.440284959391667	0.385113080046125	FBXL20/ATP13A2/STXBP1/ANXA1/RIMS2	5
GO:0048041	focal adhesion assembly	3/263	85/18805	0.0352941176470588	2.52359651084769	1.67668398909003	0.116447880550657	0.440284959391667	0.385113080046125	LIMCH1/EFNA5/PHLDB2	3
GO:0002708	positive regulation of lymphocyte mediated immunity	4/263	133/18805	0.0300751879699248	2.15043311701307	1.58568341314418	0.11652276264984	0.440284959391667	0.385113080046125	IL1R1/CADM1/HPX/TNF	4
GO:0010595	positive regulation of endothelial cell migration	4/263	133/18805	0.0300751879699248	2.15043311701307	1.58568341314418	0.11652276264984	0.440284959391667	0.385113080046125	SMOC2/FGFR1/SASH1/ANXA1	4
GO:0000578	embryonic axis specification	2/263	42/18805	0.0476190476190476	3.40485243527069	1.85817514107344	0.116652130363862	0.440284959391667	0.385113080046125	FRS2/MESP1	2
GO:0002691	regulation of cellular extravasation	2/263	42/18805	0.0476190476190476	3.40485243527069	1.85817514107344	0.116652130363862	0.440284959391667	0.385113080046125	CD99/IL1R1	2
GO:0031146	SCF-dependent proteasomal ubiquitin-dependent protein catabolic process	2/263	42/18805	0.0476190476190476	3.40485243527069	1.85817514107344	0.116652130363862	0.440284959391667	0.385113080046125	FBXL20/FBXL7	2
GO:0051154	negative regulation of striated muscle cell differentiation	2/263	42/18805	0.0476190476190476	3.40485243527069	1.85817514107344	0.116652130363862	0.440284959391667	0.385113080046125	FRS2/RGS2	2
GO:1903115	regulation of actin filament-based movement	2/263	42/18805	0.0476190476190476	3.40485243527069	1.85817514107344	0.116652130363862	0.440284959391667	0.385113080046125	JUP/STC1	2
GO:2000008	regulation of protein localization to cell surface	2/263	42/18805	0.0476190476190476	3.40485243527069	1.85817514107344	0.116652130363862	0.440284959391667	0.385113080046125	ERBB4/TNF	2
GO:2000403	positive regulation of lymphocyte migration	2/263	42/18805	0.0476190476190476	3.40485243527069	1.85817514107344	0.116652130363862	0.440284959391667	0.385113080046125	ASCL2/S100A7	2
GO:0002698	negative regulation of immune effector process	4/263	134/18805	0.0298507462686567	2.13438510867715	1.56947294508587	0.118870098333421	0.448142990856549	0.391986425673742	LGALS1/ANXA1/ASCL2/TNF	4
GO:0001709	cell fate determination	2/263	43/18805	0.0465116279069767	3.32566982049695	1.81830790293705	0.121263420257512	0.453854689045265	0.396982393932093	KLF4/MESP1	2
GO:0002714	positive regulation of B cell mediated immunity	2/263	43/18805	0.0465116279069767	3.32566982049695	1.81830790293705	0.121263420257512	0.453854689045265	0.396982393932093	HPX/TNF	2
GO:0002891	positive regulation of immunoglobulin mediated immune response	2/263	43/18805	0.0465116279069767	3.32566982049695	1.81830790293705	0.121263420257512	0.453854689045265	0.396982393932093	HPX/TNF	2
GO:0007595	lactation	2/263	43/18805	0.0465116279069767	3.32566982049695	1.81830790293705	0.121263420257512	0.453854689045265	0.396982393932093	MED1/ERBB4	2
GO:0060412	ventricular septum morphogenesis	2/263	43/18805	0.0465116279069767	3.32566982049695	1.81830790293705	0.121263420257512	0.453854689045265	0.396982393932093	ROBO2/FGFR2	2
GO:0120033	negative regulation of plasma membrane bounded cell projection assembly	2/263	43/18805	0.0465116279069767	3.32566982049695	1.81830790293705	0.121263420257512	0.453854689045265	0.396982393932093	EVL/TACSTD2	2
GO:0007219	Notch signaling pathway	5/263	187/18805	0.0267379679144385	1.91181553852097	1.49240256326303	0.122357827253162	0.453854689045265	0.396982393932093	KRT19/SNAI1/EGFL7/MESP1/ROBO2	5
GO:0019827	stem cell population maintenance	5/263	187/18805	0.0267379679144385	1.91181553852097	1.49240256326303	0.122357827253162	0.453854689045265	0.396982393932093	PCM1/KLF4/KLF10/ASCL2/LBH	5
GO:0120193	tight junction organization	3/263	87/18805	0.0344827586206897	2.46558279795463	1.63179264337095	0.122541519590797	0.453854689045265	0.396982393932093	SNAI1/RAMP2/TNF	3
GO:0034612	response to tumor necrosis factor	6/263	241/18805	0.024896265560166	1.78013031885521	1.45165898041283	0.123004375713503	0.453854689045265	0.396982393932093	GSTP1/PYDC1/ASAH1/CTSK/TNF/CXCL8	6
GO:0006469	negative regulation of protein kinase activity	4/263	136/18805	0.0294117647058824	2.10299709237307	1.53747478180636	0.123625886044548	0.453854689045265	0.396982393932093	GSTP1/GADD45A/SFN/RGS2	4
GO:0045931	positive regulation of mitotic cell cycle	4/263	136/18805	0.0294117647058824	2.10299709237307	1.53747478180636	0.123625886044548	0.453854689045265	0.396982393932093	SMOC2/FGFR1/ANXA1/CDC6	4
GO:0051384	response to glucocorticoid	4/263	136/18805	0.0294117647058824	2.10299709237307	1.53747478180636	0.123625886044548	0.453854689045265	0.396982393932093	ANXA1/STC1/TNF/NR3C1	4
GO:0061844	antimicrobial humoral immune response mediated by antimicrobial peptide	4/263	136/18805	0.0294117647058824	2.10299709237307	1.53747478180636	0.123625886044548	0.453854689045265	0.396982393932093	LTF/S100A7/CXCL8/S100A9	4
GO:0007422	peripheral nervous system development	3/263	88/18805	0.0340909090909091	2.43756481161424	1.60981272755239	0.125631385664909	0.453854689045265	0.396982393932093	PMP22/ERBB2/NEFH	3
GO:0071347	cellular response to interleukin-1	3/263	88/18805	0.0340909090909091	2.43756481161424	1.60981272755239	0.125631385664909	0.453854689045265	0.396982393932093	PYDC1/IL1R1/CXCL8	3
GO:0014002	astrocyte development	2/263	44/18805	0.0454545454545455	3.25008641548565	1.77959940281318	0.125918827331415	0.453854689045265	0.396982393932093	TNF/S100A9	2
GO:0030501	positive regulation of bone mineralization	2/263	44/18805	0.0454545454545455	3.25008641548565	1.77959940281318	0.125918827331415	0.453854689045265	0.396982393932093	BMPR1B/LTF	2
GO:0045429	positive regulation of nitric oxide biosynthetic process	2/263	44/18805	0.0454545454545455	3.25008641548565	1.77959940281318	0.125918827331415	0.453854689045265	0.396982393932093	KLF4/TNF	2
GO:0051084	'de novo' post-translational protein folding	2/263	44/18805	0.0454545454545455	3.25008641548565	1.77959940281318	0.125918827331415	0.453854689045265	0.396982393932093	BAG1/ENTPD5	2
GO:0051938	L-glutamate import	2/263	44/18805	0.0454545454545455	3.25008641548565	1.77959940281318	0.125918827331415	0.453854689045265	0.396982393932093	STXBP1/TNF	2
GO:0072595	maintenance of protein localization in organelle	2/263	44/18805	0.0454545454545455	3.25008641548565	1.77959940281318	0.125918827331415	0.453854689045265	0.396982393932093	PGR/KDELR3	2
GO:0097178	ruffle assembly	2/263	44/18805	0.0454545454545455	3.25008641548565	1.77959940281318	0.125918827331415	0.453854689045265	0.396982393932093	EVL/TACSTD2	2
GO:2001234	negative regulation of apoptotic signaling pathway	6/263	243/18805	0.0246913580246914	1.76547904051073	1.43037122113356	0.12651191692973	0.453854689045265	0.396982393932093	GSTP1/KLF4/SNAI1/CREB3L1/MEIS3/TNF	6
GO:0051302	regulation of cell division	5/263	190/18805	0.0263157894736842	1.88162897738643	1.45464106427006	0.128410385021271	0.453854689045265	0.396982393932093	SFN/TEX14/FGFR2/CDC6/LBH	5
GO:1902117	positive regulation of organelle assembly	3/263	89/18805	0.0337078651685393	2.41017644294442	1.58813218669366	0.128749189225799	0.453854689045265	0.396982393932093	G3BP2/TNF/SNX30	3
GO:0001654	eye development	9/263	415/18805	0.0216867469879518	1.55064363919557	1.35091653581283	0.129329855450838	0.453854689045265	0.396982393932093	BMPR1B/KLF4/MED1/GNGT1/FRS2/RCN1/SLITRK6/MEIS3/BCAR3	9
GO:0072593	reactive oxygen species metabolic process	6/263	245/18805	0.0244897959183673	1.75106696671064	1.40928044162378	0.13006783193923	0.453854689045265	0.396982393932093	GSTP1/GADD45A/CYBA/TNF/PRCP/PXDNL	6
GO:0016241	regulation of macroautophagy	5/263	191/18805	0.0261780104712042	1.87177751677184	1.44220567547697	0.130457935960734	0.453854689045265	0.396982393932093	HSPB8/ATP13A2/SESN3/WDR24/SNX30	5
GO:0098727	maintenance of cell number	5/263	191/18805	0.0261780104712042	1.87177751677184	1.44220567547697	0.130457935960734	0.453854689045265	0.396982393932093	PCM1/KLF4/KLF10/ASCL2/LBH	5
GO:0003176	aortic valve development	2/263	45/18805	0.0444444444444444	3.17786227291931	1.74198719667672	0.130616228246174	0.453854689045265	0.396982393932093	SNAI1/ROBO2	2
GO:0030574	collagen catabolic process	2/263	45/18805	0.0444444444444444	3.17786227291931	1.74198719667672	0.130616228246174	0.453854689045265	0.396982393932093	CTSB/CTSK	2
GO:0042554	superoxide anion generation	2/263	45/18805	0.0444444444444444	3.17786227291931	1.74198719667672	0.130616228246174	0.453854689045265	0.396982393932093	GSTP1/CYBA	2
GO:0048713	regulation of oligodendrocyte differentiation	2/263	45/18805	0.0444444444444444	3.17786227291931	1.74198719667672	0.130616228246174	0.453854689045265	0.396982393932093	TMEM98/CXCR4	2
GO:1904407	positive regulation of nitric oxide metabolic process	2/263	45/18805	0.0444444444444444	3.17786227291931	1.74198719667672	0.130616228246174	0.453854689045265	0.396982393932093	KLF4/TNF	2
GO:0046328	regulation of JNK cascade	4/263	139/18805	0.0287769784172662	2.05760866591898	1.49049827321688	0.130908885805716	0.453854689045265	0.396982393932093	GSTP1/TRAF4/GADD45A/TNF	4
GO:0001542	ovulation from ovarian follicle	1/263	10/18805	0.1	7.15019011406844	2.31681887635165	0.131404362169706	0.453854689045265	0.396982393932093	PGR	1
GO:0002317	plasma cell differentiation	1/263	10/18805	0.1	7.15019011406844	2.31681887635165	0.131404362169706	0.453854689045265	0.396982393932093	LGALS1	1
GO:0002536	respiratory burst involved in inflammatory response	1/263	10/18805	0.1	7.15019011406844	2.31681887635165	0.131404362169706	0.453854689045265	0.396982393932093	S100A9	1
GO:0006104	succinyl-CoA metabolic process	1/263	10/18805	0.1	7.15019011406844	2.31681887635165	0.131404362169706	0.453854689045265	0.396982393932093	NUDT8	1
GO:0006702	androgen biosynthetic process	1/263	10/18805	0.1	7.15019011406844	2.31681887635165	0.131404362169706	0.453854689045265	0.396982393932093	MED1	1
GO:0007252	I-kappaB phosphorylation	1/263	10/18805	0.1	7.15019011406844	2.31681887635165	0.131404362169706	0.453854689045265	0.396982393932093	TNF	1
GO:0014049	positive regulation of glutamate secretion	1/263	10/18805	0.1	7.15019011406844	2.31681887635165	0.131404362169706	0.453854689045265	0.396982393932093	STXBP1	1
GO:0015820	L-leucine transport	1/263	10/18805	0.1	7.15019011406844	2.31681887635165	0.131404362169706	0.453854689045265	0.396982393932093	SLC43A1	1
GO:0018242	protein O-linked glycosylation via serine	1/263	10/18805	0.1	7.15019011406844	2.31681887635165	0.131404362169706	0.453854689045265	0.396982393932093	GALNT3	1
GO:0018243	protein O-linked glycosylation via threonine	1/263	10/18805	0.1	7.15019011406844	2.31681887635165	0.131404362169706	0.453854689045265	0.396982393932093	GALNT3	1
GO:0031652	positive regulation of heat generation	1/263	10/18805	0.1	7.15019011406844	2.31681887635165	0.131404362169706	0.453854689045265	0.396982393932093	TNF	1
GO:0033034	positive regulation of myeloid cell apoptotic process	1/263	10/18805	0.1	7.15019011406844	2.31681887635165	0.131404362169706	0.453854689045265	0.396982393932093	ANXA1	1
GO:0033148	positive regulation of intracellular estrogen receptor signaling pathway	1/263	10/18805	0.1	7.15019011406844	2.31681887635165	0.131404362169706	0.453854689045265	0.396982393932093	MED1	1
GO:0038129	ERBB3 signaling pathway	1/263	10/18805	0.1	7.15019011406844	2.31681887635165	0.131404362169706	0.453854689045265	0.396982393932093	ERBB2	1
GO:0044829	positive regulation by host of viral genome replication	1/263	10/18805	0.1	7.15019011406844	2.31681887635165	0.131404362169706	0.453854689045265	0.396982393932093	STOM	1
GO:0044837	actomyosin contractile ring organization	1/263	10/18805	0.1	7.15019011406844	2.31681887635165	0.131404362169706	0.453854689045265	0.396982393932093	IQGAP2	1
GO:0045136	development of secondary sexual characteristics	1/263	10/18805	0.1	7.15019011406844	2.31681887635165	0.131404362169706	0.453854689045265	0.396982393932093	MED1	1
GO:0045743	positive regulation of fibroblast growth factor receptor signaling pathway	1/263	10/18805	0.1	7.15019011406844	2.31681887635165	0.131404362169706	0.453854689045265	0.396982393932093	SMOC2	1
GO:0048672	positive regulation of collateral sprouting	1/263	10/18805	0.1	7.15019011406844	2.31681887635165	0.131404362169706	0.453854689045265	0.396982393932093	EFNA5	1
GO:0051964	negative regulation of synapse assembly	1/263	10/18805	0.1	7.15019011406844	2.31681887635165	0.131404362169706	0.453854689045265	0.396982393932093	ROBO2	1
GO:0060052	neurofilament cytoskeleton organization	1/263	10/18805	0.1	7.15019011406844	2.31681887635165	0.131404362169706	0.453854689045265	0.396982393932093	NEFH	1
GO:0060502	epithelial cell proliferation involved in lung morphogenesis	1/263	10/18805	0.1	7.15019011406844	2.31681887635165	0.131404362169706	0.453854689045265	0.396982393932093	FGFR2	1
GO:0060717	chorion development	1/263	10/18805	0.1	7.15019011406844	2.31681887635165	0.131404362169706	0.453854689045265	0.396982393932093	ASCL2	1
GO:0060947	cardiac vascular smooth muscle cell differentiation	1/263	10/18805	0.1	7.15019011406844	2.31681887635165	0.131404362169706	0.453854689045265	0.396982393932093	MESP1	1
GO:0070189	kynurenine metabolic process	1/263	10/18805	0.1	7.15019011406844	2.31681887635165	0.131404362169706	0.453854689045265	0.396982393932093	KYNU	1
GO:0070303	negative regulation of stress-activated protein kinase signaling cascade	1/263	10/18805	0.1	7.15019011406844	2.31681887635165	0.131404362169706	0.453854689045265	0.396982393932093	GSTP1	1
GO:0070562	regulation of vitamin D receptor signaling pathway	1/263	10/18805	0.1	7.15019011406844	2.31681887635165	0.131404362169706	0.453854689045265	0.396982393932093	MED1	1
GO:0071287	cellular response to manganese ion	1/263	10/18805	0.1	7.15019011406844	2.31681887635165	0.131404362169706	0.453854689045265	0.396982393932093	ATP13A2	1
GO:0071372	cellular response to follicle-stimulating hormone stimulus	1/263	10/18805	0.1	7.15019011406844	2.31681887635165	0.131404362169706	0.453854689045265	0.396982393932093	EFNA5	1
GO:0071600	otic vesicle morphogenesis	1/263	10/18805	0.1	7.15019011406844	2.31681887635165	0.131404362169706	0.453854689045265	0.396982393932093	FGFR2	1
GO:0071803	positive regulation of podosome assembly	1/263	10/18805	0.1	7.15019011406844	2.31681887635165	0.131404362169706	0.453854689045265	0.396982393932093	TNF	1
GO:0071838	cell proliferation in bone marrow	1/263	10/18805	0.1	7.15019011406844	2.31681887635165	0.131404362169706	0.453854689045265	0.396982393932093	FGFR2	1
GO:0090269	fibroblast growth factor production	1/263	10/18805	0.1	7.15019011406844	2.31681887635165	0.131404362169706	0.453854689045265	0.396982393932093	FGFR1	1
GO:0090270	regulation of fibroblast growth factor production	1/263	10/18805	0.1	7.15019011406844	2.31681887635165	0.131404362169706	0.453854689045265	0.396982393932093	FGFR1	1
GO:0098917	retrograde trans-synaptic signaling	1/263	10/18805	0.1	7.15019011406844	2.31681887635165	0.131404362169706	0.453854689045265	0.396982393932093	FARP1	1
GO:0120197	mucociliary clearance	1/263	10/18805	0.1	7.15019011406844	2.31681887635165	0.131404362169706	0.453854689045265	0.396982393932093	NEK10	1
GO:1900748	positive regulation of vascular endothelial growth factor signaling pathway	1/263	10/18805	0.1	7.15019011406844	2.31681887635165	0.131404362169706	0.453854689045265	0.396982393932093	SMOC2	1
GO:1901072	glucosamine-containing compound catabolic process	1/263	10/18805	0.1	7.15019011406844	2.31681887635165	0.131404362169706	0.453854689045265	0.396982393932093	CHI3L2	1
GO:1902513	regulation of organelle transport along microtubule	1/263	10/18805	0.1	7.15019011406844	2.31681887635165	0.131404362169706	0.453854689045265	0.396982393932093	NEFH	1
GO:1903799	negative regulation of miRNA processing	1/263	10/18805	0.1	7.15019011406844	2.31681887635165	0.131404362169706	0.453854689045265	0.396982393932093	HOXB-AS3	1
GO:1903911	positive regulation of receptor clustering	1/263	10/18805	0.1	7.15019011406844	2.31681887635165	0.131404362169706	0.453854689045265	0.396982393932093	FARP1	1
GO:1904383	response to sodium phosphate	1/263	10/18805	0.1	7.15019011406844	2.31681887635165	0.131404362169706	0.453854689045265	0.396982393932093	FGFR1	1
GO:1904667	negative regulation of ubiquitin protein ligase activity	1/263	10/18805	0.1	7.15019011406844	2.31681887635165	0.131404362169706	0.453854689045265	0.396982393932093	RPL23	1
GO:1904683	regulation of metalloendopeptidase activity	1/263	10/18805	0.1	7.15019011406844	2.31681887635165	0.131404362169706	0.453854689045265	0.396982393932093	TIMP3	1
GO:0045930	negative regulation of mitotic cell cycle	6/263	246/18805	0.024390243902439	1.74394880830938	1.39880774167345	0.131863749205979	0.45483259064947	0.397837755194713	KLF4/OVOL1/TEX14/CDC6/TNF/CDKN2B	6
GO:0006936	muscle contraction	8/263	359/18805	0.0222841225626741	1.59335712848322	1.35187642178861	0.132058082240502	0.45483259064947	0.397837755194713	TNNT1/JUP/CXCR4/SULF2/RGS2/ANXA6/STC1/TNF	8
GO:0043433	negative regulation of DNA-binding transcription factor activity	4/263	140/18805	0.0285714285714286	2.04291146116241	1.4751023946684	0.133375426025213	0.45483259064947	0.397837755194713	PIM1/ID1/HES6/FZD6	4
GO:0090288	negative regulation of cellular response to growth factor stimulus	4/263	140/18805	0.0285714285714286	2.04291146116241	1.4751023946684	0.133375426025213	0.45483259064947	0.397837755194713	CREB3L1/SULF2/SPART/CHRD	4
GO:0022604	regulation of cell morphogenesis	6/263	247/18805	0.0242914979757085	1.73688828681824	1.38838288652297	0.133671540829541	0.45483259064947	0.397837755194713	HPN/ANXA1/CXCR4/FN1/EFNA5/RIMS2	6
GO:0150063	visual system development	9/263	419/18805	0.0214797136038186	1.53584035863045	1.32106294666943	0.134768028901442	0.45483259064947	0.397837755194713	BMPR1B/KLF4/MED1/GNGT1/FRS2/RCN1/SLITRK6/MEIS3/BCAR3	9
GO:0048708	astrocyte differentiation	3/263	91/18805	0.032967032967033	2.35720553211048	1.54563773471081	0.135066321599337	0.45483259064947	0.397837755194713	TNF/NR3C1/S100A9	3
GO:0019098	reproductive behavior	2/263	46/18805	0.0434782608695652	3.10877831046454	1.70541354246718	0.135353550012136	0.45483259064947	0.397837755194713	KLK14/NR3C1	2
GO:0030149	sphingolipid catabolic process	2/263	46/18805	0.0434782608695652	3.10877831046454	1.70541354246718	0.135353550012136	0.45483259064947	0.397837755194713	ASAH1/ALDH3B2	2
GO:0031638	zymogen activation	2/263	46/18805	0.0434782608695652	3.10877831046454	1.70541354246718	0.135353550012136	0.45483259064947	0.397837755194713	PLAT/HPN	2
GO:0045646	regulation of erythrocyte differentiation	2/263	46/18805	0.0434782608695652	3.10877831046454	1.70541354246718	0.135353550012136	0.45483259064947	0.397837755194713	MED1/MAFB	2
GO:0060711	labyrinthine layer development	2/263	46/18805	0.0434782608695652	3.10877831046454	1.70541354246718	0.135353550012136	0.45483259064947	0.397837755194713	SOCS3/FGFR2	2
GO:1900744	regulation of p38MAPK cascade	2/263	46/18805	0.0434782608695652	3.10877831046454	1.70541354246718	0.135353550012136	0.45483259064947	0.397837755194713	GADD45A/SASH1	2
GO:0010927	cellular component assembly involved in morphogenesis	4/263	141/18805	0.0283687943262411	2.0284227273953	1.45983430907231	0.135861002291815	0.45483259064947	0.397837755194713	KRT19/PMP22/TNNT1/PHLDB2	4
GO:0032989	cellular anatomical entity morphogenesis	4/263	141/18805	0.0283687943262411	2.0284227273953	1.45983430907231	0.135861002291815	0.45483259064947	0.397837755194713	KRT19/PMP22/TNNT1/PHLDB2	4
GO:0000910	cytokinesis	5/263	194/18805	0.0257731958762887	1.84283250362589	1.40534189480325	0.136688947670575	0.45483259064947	0.397837755194713	IQGAP2/TEX14/SPART/TRIM36/CDC6	5
GO:0071230	cellular response to amino acid stimulus	3/263	92/18805	0.0326086956521739	2.3315837328484	1.52480881160764	0.138264505110992	0.45483259064947	0.397837755194713	SESN3/SOCS1/TNF	3
GO:0006874	intracellular calcium ion homeostasis	7/263	306/18805	0.0228758169934641	1.63566440517905	1.33517806043228	0.138667544462089	0.45483259064947	0.397837755194713	CYBA/ATP13A2/ATP13A1/ITPR2/ANXA6/STC1/STC2	7
GO:0051091	positive regulation of DNA-binding transcription factor activity	5/263	195/18805	0.0256410256410256	1.83338208053037	1.39319845516925	0.138794979249547	0.45483259064947	0.397837755194713	LTF/JUP/RIPK4/TNF/S100A9	5
GO:1902107	positive regulation of leukocyte differentiation	5/263	195/18805	0.0256410256410256	1.83338208053037	1.39319845516925	0.138794979249547	0.45483259064947	0.397837755194713	KLF10/SOCS1/ANXA1/RHOH/TNF	5
GO:1903708	positive regulation of hemopoiesis	5/263	195/18805	0.0256410256410256	1.83338208053037	1.39319845516925	0.138794979249547	0.45483259064947	0.397837755194713	KLF10/SOCS1/ANXA1/RHOH/TNF	5
GO:0002920	regulation of humoral immune response	2/263	47/18805	0.0425531914893617	3.04263409109295	1.66982495149232	0.140128769005367	0.45483259064947	0.397837755194713	HPX/TNF	2
GO:0003009	skeletal muscle contraction	2/263	47/18805	0.0425531914893617	3.04263409109295	1.66982495149232	0.140128769005367	0.45483259064947	0.397837755194713	TNNT1/TNF	2
GO:0031641	regulation of myelination	2/263	47/18805	0.0425531914893617	3.04263409109295	1.66982495149232	0.140128769005367	0.45483259064947	0.397837755194713	TMEM98/TNF	2
GO:0032941	secretion by tissue	2/263	47/18805	0.0425531914893617	3.04263409109295	1.66982495149232	0.140128769005367	0.45483259064947	0.397837755194713	CYBA/CELSR2	2
GO:0055010	ventricular cardiac muscle tissue morphogenesis	2/263	47/18805	0.0425531914893617	3.04263409109295	1.66982495149232	0.140128769005367	0.45483259064947	0.397837755194713	MED1/FGFR2	2
GO:0060071	Wnt signaling pathway, planar cell polarity pathway	2/263	47/18805	0.0425531914893617	3.04263409109295	1.66982495149232	0.140128769005367	0.45483259064947	0.397837755194713	CELSR2/FZD6	2
GO:0010212	response to ionizing radiation	4/263	143/18805	0.027972027972028	2.0000531787604	1.42967304126464	0.14088828516844	0.45483259064947	0.397837755194713	NET1/GADD45A/TSPYL5/TNF	4
GO:0043467	regulation of generation of precursor metabolites and energy	4/263	143/18805	0.027972027972028	2.0000531787604	1.42967304126464	0.14088828516844	0.45483259064947	0.397837755194713	DNAJC15/CISD1/AK4/TNF	4
GO:0002040	sprouting angiogenesis	5/263	197/18805	0.0253807106598985	1.81476906448438	1.36912311478495	0.143049800539171	0.45483259064947	0.397837755194713	KLF4/CREB3L1/S100A1/ANXA1/RAMP2	5
GO:1905475	regulation of protein localization to membrane	5/263	197/18805	0.0253807106598985	1.81476906448438	1.36912311478495	0.143049800539171	0.45483259064947	0.397837755194713	STOM/FARP1/ERBB2/SFN/TNF	5
GO:0033673	negative regulation of kinase activity	4/263	144/18805	0.0277777777777778	1.98616392057457	1.41477574713973	0.143429497599565	0.45483259064947	0.397837755194713	GSTP1/GADD45A/SFN/RGS2	4
GO:0000491	small nucleolar ribonucleoprotein complex assembly	1/263	11/18805	0.0909090909090909	6.50017283097131	2.17314034619092	0.143558693255068	0.45483259064947	0.397837755194713	ZNHIT6	1
GO:0000512	lncRNA-mediated post-transcriptional gene silencing	1/263	11/18805	0.0909090909090909	6.50017283097131	2.17314034619092	0.143558693255068	0.45483259064947	0.397837755194713	XIST	1
GO:0001660	fever generation	1/263	11/18805	0.0909090909090909	6.50017283097131	2.17314034619092	0.143558693255068	0.45483259064947	0.397837755194713	TNF	1
GO:0003139	secondary heart field specification	1/263	11/18805	0.0909090909090909	6.50017283097131	2.17314034619092	0.143558693255068	0.45483259064947	0.397837755194713	MESP1	1
GO:0003263	cardioblast proliferation	1/263	11/18805	0.0909090909090909	6.50017283097131	2.17314034619092	0.143558693255068	0.45483259064947	0.397837755194713	PIM1	1
GO:0003264	regulation of cardioblast proliferation	1/263	11/18805	0.0909090909090909	6.50017283097131	2.17314034619092	0.143558693255068	0.45483259064947	0.397837755194713	PIM1	1
GO:0006568	L-tryptophan metabolic process	1/263	11/18805	0.0909090909090909	6.50017283097131	2.17314034619092	0.143558693255068	0.45483259064947	0.397837755194713	KYNU	1
GO:0007343	egg activation	1/263	11/18805	0.0909090909090909	6.50017283097131	2.17314034619092	0.143558693255068	0.45483259064947	0.397837755194713	PLAT	1
GO:0009188	ribonucleoside diphosphate biosynthetic process	1/263	11/18805	0.0909090909090909	6.50017283097131	2.17314034619092	0.143558693255068	0.45483259064947	0.397837755194713	AK4	1
GO:0010624	regulation of Schwann cell proliferation	1/263	11/18805	0.0909090909090909	6.50017283097131	2.17314034619092	0.143558693255068	0.45483259064947	0.397837755194713	ASCL2	1
GO:0010807	regulation of synaptic vesicle priming	1/263	11/18805	0.0909090909090909	6.50017283097131	2.17314034619092	0.143558693255068	0.45483259064947	0.397837755194713	STXBP1	1
GO:0014010	Schwann cell proliferation	1/263	11/18805	0.0909090909090909	6.50017283097131	2.17314034619092	0.143558693255068	0.45483259064947	0.397837755194713	ASCL2	1
GO:0021562	vestibulocochlear nerve development	1/263	11/18805	0.0909090909090909	6.50017283097131	2.17314034619092	0.143558693255068	0.45483259064947	0.397837755194713	SLITRK6	1
GO:0021603	cranial nerve formation	1/263	11/18805	0.0909090909090909	6.50017283097131	2.17314034619092	0.143558693255068	0.45483259064947	0.397837755194713	MAFB	1
GO:0021860	pyramidal neuron development	1/263	11/18805	0.0909090909090909	6.50017283097131	2.17314034619092	0.143558693255068	0.45483259064947	0.397837755194713	FGFR2	1
GO:0030223	neutrophil differentiation	1/263	11/18805	0.0909090909090909	6.50017283097131	2.17314034619092	0.143558693255068	0.45483259064947	0.397837755194713	FASN	1
GO:0031666	positive regulation of lipopolysaccharide-mediated signaling pathway	1/263	11/18805	0.0909090909090909	6.50017283097131	2.17314034619092	0.143558693255068	0.45483259064947	0.397837755194713	SASH1	1
GO:0031943	regulation of glucocorticoid metabolic process	1/263	11/18805	0.0909090909090909	6.50017283097131	2.17314034619092	0.143558693255068	0.45483259064947	0.397837755194713	NR3C1	1
GO:0032060	bleb assembly	1/263	11/18805	0.0909090909090909	6.50017283097131	2.17314034619092	0.143558693255068	0.45483259064947	0.397837755194713	PMP22	1
GO:0032525	somite rostral/caudal axis specification	1/263	11/18805	0.0909090909090909	6.50017283097131	2.17314034619092	0.143558693255068	0.45483259064947	0.397837755194713	MESP1	1
GO:0032782	bile acid secretion	1/263	11/18805	0.0909090909090909	6.50017283097131	2.17314034619092	0.143558693255068	0.45483259064947	0.397837755194713	TNF	1
GO:0032836	glomerular basement membrane development	1/263	11/18805	0.0909090909090909	6.50017283097131	2.17314034619092	0.143558693255068	0.45483259064947	0.397837755194713	SULF2	1
GO:0033085	negative regulation of T cell differentiation in thymus	1/263	11/18805	0.0909090909090909	6.50017283097131	2.17314034619092	0.143558693255068	0.45483259064947	0.397837755194713	ERBB2	1
GO:0033145	positive regulation of intracellular steroid hormone receptor signaling pathway	1/263	11/18805	0.0909090909090909	6.50017283097131	2.17314034619092	0.143558693255068	0.45483259064947	0.397837755194713	MED1	1
GO:0033314	mitotic DNA replication checkpoint signaling	1/263	11/18805	0.0909090909090909	6.50017283097131	2.17314034619092	0.143558693255068	0.45483259064947	0.397837755194713	CDC6	1
GO:0033504	floor plate development	1/263	11/18805	0.0909090909090909	6.50017283097131	2.17314034619092	0.143558693255068	0.45483259064947	0.397837755194713	CHRD	1
GO:0034115	negative regulation of heterotypic cell-cell adhesion	1/263	11/18805	0.0909090909090909	6.50017283097131	2.17314034619092	0.143558693255068	0.45483259064947	0.397837755194713	KLF4	1
GO:0035878	nail development	1/263	11/18805	0.0909090909090909	6.50017283097131	2.17314034619092	0.143558693255068	0.45483259064947	0.397837755194713	FZD6	1
GO:0044062	regulation of excretion	1/263	11/18805	0.0909090909090909	6.50017283097131	2.17314034619092	0.143558693255068	0.45483259064947	0.397837755194713	STC1	1
GO:0046689	response to mercury ion	1/263	11/18805	0.0909090909090909	6.50017283097131	2.17314034619092	0.143558693255068	0.45483259064947	0.397837755194713	SLC39A8	1
GO:0046710	GDP metabolic process	1/263	11/18805	0.0909090909090909	6.50017283097131	2.17314034619092	0.143558693255068	0.45483259064947	0.397837755194713	ENTPD4	1
GO:0046940	nucleoside monophosphate phosphorylation	1/263	11/18805	0.0909090909090909	6.50017283097131	2.17314034619092	0.143558693255068	0.45483259064947	0.397837755194713	AK4	1
GO:0051838	cytolysis by host of symbiont cells	1/263	11/18805	0.0909090909090909	6.50017283097131	2.17314034619092	0.143558693255068	0.45483259064947	0.397837755194713	LTF	1
GO:0060601	lateral sprouting from an epithelium	1/263	11/18805	0.0909090909090909	6.50017283097131	2.17314034619092	0.143558693255068	0.45483259064947	0.397837755194713	FGFR2	1
GO:0060707	trophoblast giant cell differentiation	1/263	11/18805	0.0909090909090909	6.50017283097131	2.17314034619092	0.143558693255068	0.45483259064947	0.397837755194713	SNAI1	1
GO:0060736	prostate gland growth	1/263	11/18805	0.0909090909090909	6.50017283097131	2.17314034619092	0.143558693255068	0.45483259064947	0.397837755194713	FGFR2	1
GO:0060742	epithelial cell differentiation involved in prostate gland development	1/263	11/18805	0.0909090909090909	6.50017283097131	2.17314034619092	0.143558693255068	0.45483259064947	0.397837755194713	FGFR2	1
GO:0060900	embryonic camera-type eye formation	1/263	11/18805	0.0909090909090909	6.50017283097131	2.17314034619092	0.143558693255068	0.45483259064947	0.397837755194713	FRS2	1
GO:0060920	cardiac pacemaker cell differentiation	1/263	11/18805	0.0909090909090909	6.50017283097131	2.17314034619092	0.143558693255068	0.45483259064947	0.397837755194713	MESP1	1
GO:0061470	T follicular helper cell differentiation	1/263	11/18805	0.0909090909090909	6.50017283097131	2.17314034619092	0.143558693255068	0.45483259064947	0.397837755194713	ASCL2	1
GO:0062028	regulation of stress granule assembly	1/263	11/18805	0.0909090909090909	6.50017283097131	2.17314034619092	0.143558693255068	0.45483259064947	0.397837755194713	G3BP2	1
GO:0062111	zinc ion import into organelle	1/263	11/18805	0.0909090909090909	6.50017283097131	2.17314034619092	0.143558693255068	0.45483259064947	0.397837755194713	SLC30A8	1
GO:0070587	regulation of cell-cell adhesion involved in gastrulation	1/263	11/18805	0.0909090909090909	6.50017283097131	2.17314034619092	0.143558693255068	0.45483259064947	0.397837755194713	KLF4	1
GO:0071635	negative regulation of transforming growth factor beta production	1/263	11/18805	0.0909090909090909	6.50017283097131	2.17314034619092	0.143558693255068	0.45483259064947	0.397837755194713	FN1	1
GO:0090009	primitive streak formation	1/263	11/18805	0.0909090909090909	6.50017283097131	2.17314034619092	0.143558693255068	0.45483259064947	0.397837755194713	ETS2	1
GO:0090557	establishment of endothelial intestinal barrier	1/263	11/18805	0.0909090909090909	6.50017283097131	2.17314034619092	0.143558693255068	0.45483259064947	0.397837755194713	FASN	1
GO:0097646	calcitonin family receptor signaling pathway	1/263	11/18805	0.0909090909090909	6.50017283097131	2.17314034619092	0.143558693255068	0.45483259064947	0.397837755194713	RAMP2	1
GO:0110011	regulation of basement membrane organization	1/263	11/18805	0.0909090909090909	6.50017283097131	2.17314034619092	0.143558693255068	0.45483259064947	0.397837755194713	PHLDB2	1
GO:1900222	negative regulation of amyloid-beta clearance	1/263	11/18805	0.0909090909090909	6.50017283097131	2.17314034619092	0.143558693255068	0.45483259064947	0.397837755194713	TNF	1
GO:1901031	regulation of response to reactive oxygen species	1/263	11/18805	0.0909090909090909	6.50017283097131	2.17314034619092	0.143558693255068	0.45483259064947	0.397837755194713	SESN3	1
GO:1903689	regulation of wound healing, spreading of epidermal cells	1/263	11/18805	0.0909090909090909	6.50017283097131	2.17314034619092	0.143558693255068	0.45483259064947	0.397837755194713	PHLDB2	1
GO:2000625	regulation of miRNA catabolic process	1/263	11/18805	0.0909090909090909	6.50017283097131	2.17314034619092	0.143558693255068	0.45483259064947	0.397837755194713	XIST	1
GO:2000726	negative regulation of cardiac muscle cell differentiation	1/263	11/18805	0.0909090909090909	6.50017283097131	2.17314034619092	0.143558693255068	0.45483259064947	0.397837755194713	FRS2	1
GO:2001204	regulation of osteoclast development	1/263	11/18805	0.0909090909090909	6.50017283097131	2.17314034619092	0.143558693255068	0.45483259064947	0.397837755194713	LTF	1
GO:0048880	sensory system development	9/263	426/18805	0.0211267605633803	1.51060354522573	1.2695575532903	0.144567754931872	0.455703247570364	0.398599310549527	BMPR1B/KLF4/MED1/GNGT1/FRS2/RCN1/SLITRK6/MEIS3/BCAR3	9
GO:0021954	central nervous system neuron development	3/263	94/18805	0.0319148936170213	2.28197556831972	1.48395210128073	0.144737241393684	0.455703247570364	0.398599310549527	ROBO2/FGFR2/NANOS1	3
GO:2000278	regulation of DNA biosynthetic process	3/263	94/18805	0.0319148936170213	2.28197556831972	1.48395210128073	0.144737241393684	0.455703247570364	0.398599310549527	SMOC2/MEAF6/TNF	3
GO:0006953	acute-phase response	2/263	48/18805	0.0416666666666667	2.97924588086185	1.63517179121202	0.144939910001135	0.455703247570364	0.398599310549527	FN1/TNF	2
GO:0070266	necroptotic process	2/263	48/18805	0.0416666666666667	2.97924588086185	1.63517179121202	0.144939910001135	0.455703247570364	0.398599310549527	PYGL/TNF	2
GO:0120163	negative regulation of cold-induced thermogenesis	2/263	48/18805	0.0416666666666667	2.97924588086185	1.63517179121202	0.144939910001135	0.455703247570364	0.398599310549527	ID1/NOVA1	2
GO:2000300	regulation of synaptic vesicle exocytosis	2/263	48/18805	0.0416666666666667	2.97924588086185	1.63517179121202	0.144939910001135	0.455703247570364	0.398599310549527	FBXL20/RIMS2	2
GO:2000516	positive regulation of CD4-positive, alpha-beta T cell activation	2/263	48/18805	0.0416666666666667	2.97924588086185	1.63517179121202	0.144939910001135	0.455703247570364	0.398599310549527	SOCS1/ANXA1	2
GO:0007178	cell surface receptor protein serine/threonine kinase signaling pathway	9/263	427/18805	0.0210772833723653	1.50706583200506	1.26227467249269	0.145996682610948	0.458588245188821	0.401122790616402	BMPR1B/LDLRAD4/GDF15/RBPMS/ID1/FMOD/SPART/CDKN2B/CHRD	9
GO:0015807	L-amino acid transport	3/263	95/18805	0.0315789473684211	2.25795477286372	1.46391089593859	0.14801064827984	0.459243829763519	0.4016962242289	STXBP1/TNF/SLC43A1	3
GO:0071677	positive regulation of mononuclear cell migration	3/263	95/18805	0.0315789473684211	2.25795477286372	1.46391089593859	0.14801064827984	0.459243829763519	0.4016962242289	ASCL2/TNF/S100A7	3
GO:0090316	positive regulation of intracellular protein transport	3/263	95/18805	0.0315789473684211	2.25795477286372	1.46391089593859	0.14801064827984	0.459243829763519	0.4016962242289	PCM1/JUP/SFN	3
GO:0001101	response to acid chemical	4/263	146/18805	0.0273972602739726	1.95895619563519	1.38533792003434	0.148565814232565	0.459243829763519	0.4016962242289	SESN3/SOCS1/TNF/COL18A1	4
GO:0006458	'de novo' protein folding	2/263	49/18805	0.0408163265306122	2.91844494451773	1.6014079325781	0.149785045224605	0.459243829763519	0.4016962242289	BAG1/ENTPD5	2
GO:0030330	DNA damage response, signal transduction by p53 class mediator	2/263	49/18805	0.0408163265306122	2.91844494451773	1.6014079325781	0.149785045224605	0.459243829763519	0.4016962242289	SNAI1/BATF	2
GO:0030850	prostate gland development	2/263	49/18805	0.0408163265306122	2.91844494451773	1.6014079325781	0.149785045224605	0.459243829763519	0.4016962242289	FRS2/FGFR2	2
GO:0061028	establishment of endothelial barrier	2/263	49/18805	0.0408163265306122	2.91844494451773	1.6014079325781	0.149785045224605	0.459243829763519	0.4016962242289	TNF/FASN	2
GO:1905314	semi-lunar valve development	2/263	49/18805	0.0408163265306122	2.91844494451773	1.6014079325781	0.149785045224605	0.459243829763519	0.4016962242289	SNAI1/ROBO2	2
GO:0060048	cardiac muscle contraction	4/263	147/18805	0.0272108843537415	1.94562996301182	1.37079355811591	0.151160412862864	0.459243829763519	0.4016962242289	JUP/CXCR4/RGS2/STC1	4
GO:0048608	reproductive structure development	7/263	314/18805	0.0222929936305732	1.59399142670316	1.26412351061455	0.152208177530561	0.459243829763519	0.4016962242289	BMPR1B/GFRA1/PGR/FRS2/TNFSF10/ROBO2/FGFR2	7
GO:0051222	positive regulation of protein transport	6/263	257/18805	0.0233463035019455	1.66930508499652	1.28666903611834	0.152385290786041	0.459243829763519	0.4016962242289	PCM1/ATP13A2/JUP/SFN/SLC30A8/TNF	6
GO:0007269	neurotransmitter secretion	4/263	148/18805	0.027027027027027	1.93248381461309	1.35636308499944	0.15377229850368	0.459243829763519	0.4016962242289	FBXL20/STXBP1/RIMS2/SNCG	4
GO:0099643	signal release from synapse	4/263	148/18805	0.027027027027027	1.93248381461309	1.35636308499944	0.15377229850368	0.459243829763519	0.4016962242289	FBXL20/STXBP1/RIMS2/SNCG	4
GO:0050807	regulation of synapse organization	7/263	315/18805	0.0222222222222222	1.58893113645965	1.2553824247802	0.153943030046966	0.459243829763519	0.4016962242289	FARP1/SLITRK6/FGFR1/ROBO2/EFNA5/TNF/CLSTN2	7
GO:0046330	positive regulation of JNK cascade	3/263	97/18805	0.0309278350515464	2.21139900435106	1.42457102251906	0.154628678557412	0.459243829763519	0.4016962242289	TRAF4/GADD45A/TNF	3
GO:0032968	positive regulation of transcription elongation by RNA polymerase II	2/263	50/18805	0.04	2.86007604562738	1.56849043613204	0.154662293418456	0.459243829763519	0.4016962242289	MED1/CDK12	2
GO:0042073	intraciliary transport	2/263	50/18805	0.04	2.86007604562738	1.56849043613204	0.154662293418456	0.459243829763519	0.4016962242289	PCM1/LCA5L	2
GO:0042491	inner ear auditory receptor cell differentiation	2/263	50/18805	0.04	2.86007604562738	1.56849043613204	0.154662293418456	0.459243829763519	0.4016962242289	SLITRK6/FGFR1	2
GO:0045747	positive regulation of Notch signaling pathway	2/263	50/18805	0.04	2.86007604562738	1.56849043613204	0.154662293418456	0.459243829763519	0.4016962242289	MESP1/ROBO2	2
GO:0001547	antral ovarian follicle growth	1/263	12/18805	0.0833333333333333	5.9584917617237	2.04628852702945	0.155543585437356	0.459243829763519	0.4016962242289	BMPR1B	1
GO:0002069	columnar/cuboidal epithelial cell maturation	1/263	12/18805	0.0833333333333333	5.9584917617237	2.04628852702945	0.155543585437356	0.459243829763519	0.4016962242289	PGR	1
GO:0002674	negative regulation of acute inflammatory response	1/263	12/18805	0.0833333333333333	5.9584917617237	2.04628852702945	0.155543585437356	0.459243829763519	0.4016962242289	GSTP1	1
GO:0003163	sinoatrial node development	1/263	12/18805	0.0833333333333333	5.9584917617237	2.04628852702945	0.155543585437356	0.459243829763519	0.4016962242289	MESP1	1
GO:0003207	cardiac chamber formation	1/263	12/18805	0.0833333333333333	5.9584917617237	2.04628852702945	0.155543585437356	0.459243829763519	0.4016962242289	MESP1	1
GO:0008611	ether lipid biosynthetic process	1/263	12/18805	0.0833333333333333	5.9584917617237	2.04628852702945	0.155543585437356	0.459243829763519	0.4016962242289	FASN	1
GO:0010172	embryonic body morphogenesis	1/263	12/18805	0.0833333333333333	5.9584917617237	2.04628852702945	0.155543585437356	0.459243829763519	0.4016962242289	PHLDB2	1
GO:0010459	negative regulation of heart rate	1/263	12/18805	0.0833333333333333	5.9584917617237	2.04628852702945	0.155543585437356	0.459243829763519	0.4016962242289	TNF	1
GO:0014831	gastro-intestinal system smooth muscle contraction	1/263	12/18805	0.0833333333333333	5.9584917617237	2.04628852702945	0.155543585437356	0.459243829763519	0.4016962242289	SULF2	1
GO:0016081	synaptic vesicle docking	1/263	12/18805	0.0833333333333333	5.9584917617237	2.04628852702945	0.155543585437356	0.459243829763519	0.4016962242289	RIMS2	1
GO:0019732	antifungal humoral response	1/263	12/18805	0.0833333333333333	5.9584917617237	2.04628852702945	0.155543585437356	0.459243829763519	0.4016962242289	LTF	1
GO:0022605	mammalian oogenesis stage	1/263	12/18805	0.0833333333333333	5.9584917617237	2.04628852702945	0.155543585437356	0.459243829763519	0.4016962242289	BMPR1B	1
GO:0031223	auditory behavior	1/263	12/18805	0.0833333333333333	5.9584917617237	2.04628852702945	0.155543585437356	0.459243829763519	0.4016962242289	SLITRK6	1
GO:0032096	negative regulation of response to food	1/263	12/18805	0.0833333333333333	5.9584917617237	2.04628852702945	0.155543585437356	0.459243829763519	0.4016962242289	GDF15	1
GO:0032099	negative regulation of appetite	1/263	12/18805	0.0833333333333333	5.9584917617237	2.04628852702945	0.155543585437356	0.459243829763519	0.4016962242289	GDF15	1
GO:0032108	negative regulation of response to nutrient levels	1/263	12/18805	0.0833333333333333	5.9584917617237	2.04628852702945	0.155543585437356	0.459243829763519	0.4016962242289	GDF15	1
GO:0034135	regulation of toll-like receptor 2 signaling pathway	1/263	12/18805	0.0833333333333333	5.9584917617237	2.04628852702945	0.155543585437356	0.459243829763519	0.4016962242289	CYBA	1
GO:0034454	microtubule anchoring at centrosome	1/263	12/18805	0.0833333333333333	5.9584917617237	2.04628852702945	0.155543585437356	0.459243829763519	0.4016962242289	PCM1	1
GO:0035435	phosphate ion transmembrane transport	1/263	12/18805	0.0833333333333333	5.9584917617237	2.04628852702945	0.155543585437356	0.459243829763519	0.4016962242289	SLC37A1	1
GO:0035812	renal sodium excretion	1/263	12/18805	0.0833333333333333	5.9584917617237	2.04628852702945	0.155543585437356	0.459243829763519	0.4016962242289	MLLT6	1
GO:0036152	phosphatidylethanolamine acyl-chain remodeling	1/263	12/18805	0.0833333333333333	5.9584917617237	2.04628852702945	0.155543585437356	0.459243829763519	0.4016962242289	MBOAT2	1
GO:0042921	nuclear receptor-mediated glucocorticoid signaling pathway	1/263	12/18805	0.0833333333333333	5.9584917617237	2.04628852702945	0.155543585437356	0.459243829763519	0.4016962242289	NR3C1	1
GO:0043508	negative regulation of JUN kinase activity	1/263	12/18805	0.0833333333333333	5.9584917617237	2.04628852702945	0.155543585437356	0.459243829763519	0.4016962242289	GSTP1	1
GO:0046504	glycerol ether biosynthetic process	1/263	12/18805	0.0833333333333333	5.9584917617237	2.04628852702945	0.155543585437356	0.459243829763519	0.4016962242289	FASN	1
GO:0048671	negative regulation of collateral sprouting	1/263	12/18805	0.0833333333333333	5.9584917617237	2.04628852702945	0.155543585437356	0.459243829763519	0.4016962242289	SPART	1
GO:0048755	branching morphogenesis of a nerve	1/263	12/18805	0.0833333333333333	5.9584917617237	2.04628852702945	0.155543585437356	0.459243829763519	0.4016962242289	FGFR2	1
GO:0050847	progesterone receptor signaling pathway	1/263	12/18805	0.0833333333333333	5.9584917617237	2.04628852702945	0.155543585437356	0.459243829763519	0.4016962242289	PGR	1
GO:0051798	positive regulation of hair follicle development	1/263	12/18805	0.0833333333333333	5.9584917617237	2.04628852702945	0.155543585437356	0.459243829763519	0.4016962242289	TNF	1
GO:0060192	negative regulation of lipase activity	1/263	12/18805	0.0833333333333333	5.9584917617237	2.04628852702945	0.155543585437356	0.459243829763519	0.4016962242289	RGS2	1
GO:0061909	autophagosome-lysosome fusion	1/263	12/18805	0.0833333333333333	5.9584917617237	2.04628852702945	0.155543585437356	0.459243829763519	0.4016962242289	ATP13A2	1
GO:0070586	cell-cell adhesion involved in gastrulation	1/263	12/18805	0.0833333333333333	5.9584917617237	2.04628852702945	0.155543585437356	0.459243829763519	0.4016962242289	KLF4	1
GO:0071233	cellular response to L-leucine	1/263	12/18805	0.0833333333333333	5.9584917617237	2.04628852702945	0.155543585437356	0.459243829763519	0.4016962242289	SESN3	1
GO:0071236	cellular response to antibiotic	1/263	12/18805	0.0833333333333333	5.9584917617237	2.04628852702945	0.155543585437356	0.459243829763519	0.4016962242289	RPL23	1
GO:0086100	endothelin receptor signaling pathway	1/263	12/18805	0.0833333333333333	5.9584917617237	2.04628852702945	0.155543585437356	0.459243829763519	0.4016962242289	BCAR3	1
GO:0097084	vascular associated smooth muscle cell development	1/263	12/18805	0.0833333333333333	5.9584917617237	2.04628852702945	0.155543585437356	0.459243829763519	0.4016962242289	RAMP2	1
GO:0098911	regulation of ventricular cardiac muscle cell action potential	1/263	12/18805	0.0833333333333333	5.9584917617237	2.04628852702945	0.155543585437356	0.459243829763519	0.4016962242289	JUP	1
GO:1901678	iron coordination entity transport	1/263	12/18805	0.0833333333333333	5.9584917617237	2.04628852702945	0.155543585437356	0.459243829763519	0.4016962242289	HPX	1
GO:1902043	positive regulation of extrinsic apoptotic signaling pathway via death domain receptors	1/263	12/18805	0.0833333333333333	5.9584917617237	2.04628852702945	0.155543585437356	0.459243829763519	0.4016962242289	BMPR1B	1
GO:1902563	regulation of neutrophil activation	1/263	12/18805	0.0833333333333333	5.9584917617237	2.04628852702945	0.155543585437356	0.459243829763519	0.4016962242289	TNF	1
GO:1904672	regulation of somatic stem cell population maintenance	1/263	12/18805	0.0833333333333333	5.9584917617237	2.04628852702945	0.155543585437356	0.459243829763519	0.4016962242289	LBH	1
GO:1905165	regulation of lysosomal protein catabolic process	1/263	12/18805	0.0833333333333333	5.9584917617237	2.04628852702945	0.155543585437356	0.459243829763519	0.4016962242289	ATP13A2	1
GO:1990253	cellular response to leucine starvation	1/263	12/18805	0.0833333333333333	5.9584917617237	2.04628852702945	0.155543585437356	0.459243829763519	0.4016962242289	SESN3	1
GO:1990504	dense core granule exocytosis	1/263	12/18805	0.0833333333333333	5.9584917617237	2.04628852702945	0.155543585437356	0.459243829763519	0.4016962242289	STXBP1	1
GO:1990709	presynaptic active zone organization	1/263	12/18805	0.0833333333333333	5.9584917617237	2.04628852702945	0.155543585437356	0.459243829763519	0.4016962242289	RIMS2	1
GO:2000343	positive regulation of chemokine (C-X-C motif) ligand 2 production	1/263	12/18805	0.0833333333333333	5.9584917617237	2.04628852702945	0.155543585437356	0.459243829763519	0.4016962242289	TNF	1
GO:2001214	positive regulation of vasculogenesis	1/263	12/18805	0.0833333333333333	5.9584917617237	2.04628852702945	0.155543585437356	0.459243829763519	0.4016962242289	RAMP2	1
GO:2001223	negative regulation of neuron migration	1/263	12/18805	0.0833333333333333	5.9584917617237	2.04628852702945	0.155543585437356	0.459243829763519	0.4016962242289	ERBB4	1
GO:0030323	respiratory tube development	5/263	203/18805	0.0246305418719212	1.7611305699676	1.29853025029709	0.15614658548728	0.460537981303428	0.402828206312207	TRAF4/PGR/FGFR1/FGFR2/TNF	5
GO:0010001	glial cell differentiation	6/263	259/18805	0.0231660231660232	1.65641469823979	1.26685747569986	0.156262476571112	0.460537981303428	0.402828206312207	TMEM98/ERBB2/CXCR4/TNF/NR3C1/S100A9	6
GO:2001235	positive regulation of apoptotic signaling pathway	4/263	149/18805	0.0268456375838926	1.91951412458213	1.34204469474572	0.156401214287871	0.460537981303428	0.402828206312207	BMPR1B/TNFSF10/TNF/S100A9	4
GO:0000281	mitotic cytokinesis	3/263	98/18805	0.0306122448979592	2.1888337083883	1.40526031722535	0.157972160056642	0.461628026494488	0.403781658507118	IQGAP2/SPART/TRIM36	3
GO:0051153	regulation of striated muscle cell differentiation	3/263	98/18805	0.0306122448979592	2.1888337083883	1.40526031722535	0.157972160056642	0.461628026494488	0.403781658507118	FRS2/MESP1/RGS2	3
GO:0061458	reproductive system development	7/263	318/18805	0.0220125786163522	1.57394122007796	1.22934	0.159202548549975	0.461628026494488	0.403781658507118	BMPR1B/GFRA1/PGR/FRS2/TNFSF10/ROBO2/FGFR2	7
GO:0045214	sarcomere organization	2/263	51/18805	0.0392156862745098	2.80399612316409	1.53637927191629	0.15956981892714	0.461628026494488	0.403781658507118	KRT19/TNNT1	2
GO:0051496	positive regulation of stress fiber assembly	2/263	51/18805	0.0392156862745098	2.80399612316409	1.53637927191629	0.15956981892714	0.461628026494488	0.403781658507118	EVL/LIMCH1	2
GO:0060119	inner ear receptor cell development	2/263	51/18805	0.0392156862745098	2.80399612316409	1.53637927191629	0.15956981892714	0.461628026494488	0.403781658507118	SLITRK6/FGFR1	2
GO:0140467	integrated stress response signaling	2/263	51/18805	0.0392156862745098	2.80399612316409	1.53637927191629	0.15956981892714	0.461628026494488	0.403781658507118	MAFB/BATF	2
GO:0051781	positive regulation of cell division	3/263	99/18805	0.0303030303030303	2.16672427699044	1.38618142231553	0.161337859792034	0.461628026494488	0.403781658507118	FGFR2/CDC6/LBH	3
GO:0060395	SMAD protein signal transduction	3/263	99/18805	0.0303030303030303	2.16672427699044	1.38618142231553	0.161337859792034	0.461628026494488	0.403781658507118	LDLRAD4/GDF15/RBPMS	3
GO:0061387	regulation of extent of cell growth	3/263	99/18805	0.0303030303030303	2.16672427699044	1.38618142231553	0.161337859792034	0.461628026494488	0.403781658507118	SPART/FN1/EFNA5	3
GO:0006119	oxidative phosphorylation	4/263	151/18805	0.0264900662251656	1.89409009644197	1.31373714339515	0.161709101609585	0.461628026494488	0.403781658507118	DNAJC15/AK4/TNF/COX6C	4
GO:0046883	regulation of hormone secretion	6/263	262/18805	0.0229007633587786	1.6374481177256	1.23745722792818	0.162159017781078	0.461628026494488	0.403781658507118	RAB11FIP1/FGFR1/ANXA1/SLC30A8/EFNA5/TNF	6
GO:1903829	positive regulation of protein localization	10/263	499/18805	0.0200400801603206	1.43290383047464	1.16726558049142	0.163147927922015	0.461628026494488	0.403781658507118	PCM1/STOM/FARP1/ERBB2/ATP13A2/JUP/SFN/ERBB4/SLC30A8/TNF	10
GO:0033157	regulation of intracellular protein transport	4/263	152/18805	0.0263157894736842	1.88162897738643	1.29974457116248	0.164387552483756	0.461628026494488	0.403781658507118	PCM1/ATP13A2/JUP/SFN	4
GO:0035107	appendage morphogenesis	4/263	152/18805	0.0263157894736842	1.88162897738643	1.29974457116248	0.164387552483756	0.461628026494488	0.403781658507118	MED1/FGFR1/FZD6/FGFR2	4
GO:0035108	limb morphogenesis	4/263	152/18805	0.0263157894736842	1.88162897738643	1.29974457116248	0.164387552483756	0.461628026494488	0.403781658507118	MED1/FGFR1/FZD6/FGFR2	4
GO:0046165	alcohol biosynthetic process	4/263	152/18805	0.0263157894736842	1.88162897738643	1.29974457116248	0.164387552483756	0.461628026494488	0.403781658507118	ASAH1/SPTSSB/QDPR/IMPA2	4
GO:0003197	endocardial cushion development	2/263	52/18805	0.0384615384615385	2.75007312079555	1.50503706897013	0.164505830797501	0.461628026494488	0.403781658507118	SNAI1/ROBO2	2
GO:0006636	unsaturated fatty acid biosynthetic process	2/263	52/18805	0.0384615384615385	2.75007312079555	1.50503706897013	0.164505830797501	0.461628026494488	0.403781658507118	FADS1/FADS2	2
GO:0032506	cytokinetic process	2/263	52/18805	0.0384615384615385	2.75007312079555	1.50503706897013	0.164505830797501	0.461628026494488	0.403781658507118	IQGAP2/SPART	2
GO:0035987	endodermal cell differentiation	2/263	52/18805	0.0384615384615385	2.75007312079555	1.50503706897013	0.164505830797501	0.461628026494488	0.403781658507118	MESP1/FN1	2
GO:0042311	vasodilation	2/263	52/18805	0.0384615384615385	2.75007312079555	1.50503706897013	0.164505830797501	0.461628026494488	0.403781658507118	RGS2/TNF	2
GO:0045776	negative regulation of blood pressure	2/263	52/18805	0.0384615384615385	2.75007312079555	1.50503706897013	0.164505830797501	0.461628026494488	0.403781658507118	TNF/PRCP	2
GO:0046466	membrane lipid catabolic process	2/263	52/18805	0.0384615384615385	2.75007312079555	1.50503706897013	0.164505830797501	0.461628026494488	0.403781658507118	ASAH1/ALDH3B2	2
GO:2001222	regulation of neuron migration	2/263	52/18805	0.0384615384615385	2.75007312079555	1.50503706897013	0.164505830797501	0.461628026494488	0.403781658507118	ERBB4/SOCS7	2
GO:0031400	negative regulation of protein modification process	7/263	321/18805	0.0218068535825545	1.55923148904919	1.20356863352728	0.164543218955507	0.461628026494488	0.403781658507118	BEX3/GSTP1/GADD45A/SFN/SOCS1/RGS2/RPL23	7
GO:0050803	regulation of synapse structure or activity	7/263	321/18805	0.0218068535825545	1.55923148904919	1.20356863352728	0.164543218955507	0.461628026494488	0.403781658507118	FARP1/SLITRK6/FGFR1/ROBO2/EFNA5/TNF/CLSTN2	7
GO:0021675	nerve development	3/263	100/18805	0.03	2.14505703422053	1.36732882662409	0.164725210030054	0.461628026494488	0.403781658507118	SLITRK6/MAFB/SULF2	3
GO:0030073	insulin secretion	5/263	207/18805	0.0241545893719807	1.72709906136919	1.25276710777407	0.165143505056839	0.461628026494488	0.403781658507118	FAM3B/SLC30A8/EFNA5/TNF/RIMS2	5
GO:0002357	defense response to tumor cell	1/263	13/18805	0.0769230769230769	5.50014624159111	1.93302071760336	0.167361391909445	0.461628026494488	0.403781658507118	KLF4	1
GO:0002863	positive regulation of inflammatory response to antigenic stimulus	1/263	13/18805	0.0769230769230769	5.50014624159111	1.93302071760336	0.167361391909445	0.461628026494488	0.403781658507118	TNF	1
GO:0002934	desmosome organization	1/263	13/18805	0.0769230769230769	5.50014624159111	1.93302071760336	0.167361391909445	0.461628026494488	0.403781658507118	JUP	1
GO:0006586	indolalkylamine metabolic process	1/263	13/18805	0.0769230769230769	5.50014624159111	1.93302071760336	0.167361391909445	0.461628026494488	0.403781658507118	KYNU	1
GO:0007320	insemination	1/263	13/18805	0.0769230769230769	5.50014624159111	1.93302071760336	0.167361391909445	0.461628026494488	0.403781658507118	KLK14	1
GO:0009415	response to water	1/263	13/18805	0.0769230769230769	5.50014624159111	1.93302071760336	0.167361391909445	0.461628026494488	0.403781658507118	COL18A1	1
GO:0016185	synaptic vesicle budding from presynaptic endocytic zone membrane	1/263	13/18805	0.0769230769230769	5.50014624159111	1.93302071760336	0.167361391909445	0.461628026494488	0.403781658507118	MX1	1
GO:0031650	regulation of heat generation	1/263	13/18805	0.0769230769230769	5.50014624159111	1.93302071760336	0.167361391909445	0.461628026494488	0.403781658507118	TNF	1
GO:0031958	nuclear receptor-mediated corticosteroid signaling pathway	1/263	13/18805	0.0769230769230769	5.50014624159111	1.93302071760336	0.167361391909445	0.461628026494488	0.403781658507118	NR3C1	1
GO:0033083	regulation of immature T cell proliferation	1/263	13/18805	0.0769230769230769	5.50014624159111	1.93302071760336	0.167361391909445	0.461628026494488	0.403781658507118	ERBB2	1
GO:0033084	regulation of immature T cell proliferation in thymus	1/263	13/18805	0.0769230769230769	5.50014624159111	1.93302071760336	0.167361391909445	0.461628026494488	0.403781658507118	ERBB2	1
GO:0033690	positive regulation of osteoblast proliferation	1/263	13/18805	0.0769230769230769	5.50014624159111	1.93302071760336	0.167361391909445	0.461628026494488	0.403781658507118	LTF	1
GO:0034145	positive regulation of toll-like receptor 4 signaling pathway	1/263	13/18805	0.0769230769230769	5.50014624159111	1.93302071760336	0.167361391909445	0.461628026494488	0.403781658507118	LTF	1
GO:0034380	high-density lipoprotein particle assembly	1/263	13/18805	0.0769230769230769	5.50014624159111	1.93302071760336	0.167361391909445	0.461628026494488	0.403781658507118	PRKACB	1
GO:0035437	maintenance of protein localization in endoplasmic reticulum	1/263	13/18805	0.0769230769230769	5.50014624159111	1.93302071760336	0.167361391909445	0.461628026494488	0.403781658507118	KDELR3	1
GO:0036462	TRAIL-activated apoptotic signaling pathway	1/263	13/18805	0.0769230769230769	5.50014624159111	1.93302071760336	0.167361391909445	0.461628026494488	0.403781658507118	TNFSF10	1
GO:0042761	very long-chain fatty acid biosynthetic process	1/263	13/18805	0.0769230769230769	5.50014624159111	1.93302071760336	0.167361391909445	0.461628026494488	0.403781658507118	HACD4	1
GO:0044406	adhesion of symbiont to host	1/263	13/18805	0.0769230769230769	5.50014624159111	1.93302071760336	0.167361391909445	0.461628026494488	0.403781658507118	LTF	1
GO:0045737	positive regulation of cyclin-dependent protein serine/threonine kinase activity	1/263	13/18805	0.0769230769230769	5.50014624159111	1.93302071760336	0.167361391909445	0.461628026494488	0.403781658507118	PIM1	1
GO:0048103	somatic stem cell division	1/263	13/18805	0.0769230769230769	5.50014624159111	1.93302071760336	0.167361391909445	0.461628026494488	0.403781658507118	LBH	1
GO:0051918	negative regulation of fibrinolysis	1/263	13/18805	0.0769230769230769	5.50014624159111	1.93302071760336	0.167361391909445	0.461628026494488	0.403781658507118	PLAT	1
GO:0060788	ectodermal placode formation	1/263	13/18805	0.0769230769230769	5.50014624159111	1.93302071760336	0.167361391909445	0.461628026494488	0.403781658507118	FRS2	1
GO:0061052	negative regulation of cell growth involved in cardiac muscle cell development	1/263	13/18805	0.0769230769230769	5.50014624159111	1.93302071760336	0.167361391909445	0.461628026494488	0.403781658507118	RGS2	1
GO:0061684	chaperone-mediated autophagy	1/263	13/18805	0.0769230769230769	5.50014624159111	1.93302071760336	0.167361391909445	0.461628026494488	0.403781658507118	ATP13A2	1
GO:0070278	extracellular matrix constituent secretion	1/263	13/18805	0.0769230769230769	5.50014624159111	1.93302071760336	0.167361391909445	0.461628026494488	0.403781658507118	CREB3L1	1
GO:0070486	leukocyte aggregation	1/263	13/18805	0.0769230769230769	5.50014624159111	1.93302071760336	0.167361391909445	0.461628026494488	0.403781658507118	S100A9	1
GO:0070828	heterochromatin organization	1/263	13/18805	0.0769230769230769	5.50014624159111	1.93302071760336	0.167361391909445	0.461628026494488	0.403781658507118	SNAI1	1
GO:0071340	skeletal muscle acetylcholine-gated channel clustering	1/263	13/18805	0.0769230769230769	5.50014624159111	1.93302071760336	0.167361391909445	0.461628026494488	0.403781658507118	FARP1	1
GO:0071472	cellular response to salt stress	1/263	13/18805	0.0769230769230769	5.50014624159111	1.93302071760336	0.167361391909445	0.461628026494488	0.403781658507118	EFHD1	1
GO:0071697	ectodermal placode morphogenesis	1/263	13/18805	0.0769230769230769	5.50014624159111	1.93302071760336	0.167361391909445	0.461628026494488	0.403781658507118	FRS2	1
GO:0071801	regulation of podosome assembly	1/263	13/18805	0.0769230769230769	5.50014624159111	1.93302071760336	0.167361391909445	0.461628026494488	0.403781658507118	TNF	1
GO:0097475	motor neuron migration	1/263	13/18805	0.0769230769230769	5.50014624159111	1.93302071760336	0.167361391909445	0.461628026494488	0.403781658507118	CELSR2	1
GO:0098814	spontaneous synaptic transmission	1/263	13/18805	0.0769230769230769	5.50014624159111	1.93302071760336	0.167361391909445	0.461628026494488	0.403781658507118	RIMS2	1
GO:0106049	regulation of cellular response to osmotic stress	1/263	13/18805	0.0769230769230769	5.50014624159111	1.93302071760336	0.167361391909445	0.461628026494488	0.403781658507118	EFHD1	1
GO:1901503	ether biosynthetic process	1/263	13/18805	0.0769230769230769	5.50014624159111	1.93302071760336	0.167361391909445	0.461628026494488	0.403781658507118	FASN	1
GO:1902047	polyamine transmembrane transport	1/263	13/18805	0.0769230769230769	5.50014624159111	1.93302071760336	0.167361391909445	0.461628026494488	0.403781658507118	ATP13A2	1
GO:1903867	extraembryonic membrane development	1/263	13/18805	0.0769230769230769	5.50014624159111	1.93302071760336	0.167361391909445	0.461628026494488	0.403781658507118	ASCL2	1
GO:1904995	negative regulation of leukocyte adhesion to vascular endothelial cell	1/263	13/18805	0.0769230769230769	5.50014624159111	1.93302071760336	0.167361391909445	0.461628026494488	0.403781658507118	KLF4	1
GO:2000035	regulation of stem cell division	1/263	13/18805	0.0769230769230769	5.50014624159111	1.93302071760336	0.167361391909445	0.461628026494488	0.403781658507118	LBH	1
GO:0006942	regulation of striated muscle contraction	3/263	101/18805	0.0297029702970297	2.1238188457629	1.34869720594657	0.168133644702672	0.461628026494488	0.403781658507118	JUP/RGS2/STC1	3
GO:0034109	homotypic cell-cell adhesion	3/263	101/18805	0.0297029702970297	2.1238188457629	1.34869720594657	0.168133644702672	0.461628026494488	0.403781658507118	CD99/JUP/STXBP1	3
GO:0034446	substrate adhesion-dependent cell spreading	3/263	101/18805	0.0297029702970297	2.1238188457629	1.34869720594657	0.168133644702672	0.461628026494488	0.403781658507118	FN1/EFNA5/TACSTD2	3
GO:0048661	positive regulation of smooth muscle cell proliferation	3/263	101/18805	0.0297029702970297	2.1238188457629	1.34869720594657	0.168133644702672	0.461628026494488	0.403781658507118	FRS2/FGFR2/TNF	3
GO:0071229	cellular response to acid chemical	3/263	101/18805	0.0297029702970297	2.1238188457629	1.34869720594657	0.168133644702672	0.461628026494488	0.403781658507118	SESN3/SOCS1/TNF	3
GO:1903035	negative regulation of response to wounding	3/263	101/18805	0.0297029702970297	2.1238188457629	1.34869720594657	0.168133644702672	0.461628026494488	0.403781658507118	PLAT/TNF/PHLDB2	3
GO:0062197	cellular response to chemical stress	7/263	323/18805	0.021671826625387	1.54957680490647	1.18653316078395	0.168147909306021	0.461628026494488	0.403781658507118	EFHD1/NET1/GDF15/ATP13A2/DHRS2/GPX8/FADS2	7
GO:0030520	estrogen receptor signaling pathway	2/263	53/18805	0.0377358490566038	2.69818494870507	1.47442889077972	0.169468581895468	0.461628026494488	0.403781658507118	MED1/LBH	2
GO:0032330	regulation of chondrocyte differentiation	2/263	53/18805	0.0377358490566038	2.69818494870507	1.47442889077972	0.169468581895468	0.461628026494488	0.403781658507118	BMPR1B/MBOAT2	2
GO:0090102	cochlea development	2/263	53/18805	0.0377358490566038	2.69818494870507	1.47442889077972	0.169468581895468	0.461628026494488	0.403781658507118	SLITRK6/HPN	2
GO:1903539	protein localization to postsynaptic membrane	2/263	53/18805	0.0377358490566038	2.69818494870507	1.47442889077972	0.169468581895468	0.461628026494488	0.403781658507118	ERBB2/ERBB4	2
GO:2000573	positive regulation of DNA biosynthetic process	2/263	53/18805	0.0377358490566038	2.69818494870507	1.47442889077972	0.169468581895468	0.461628026494488	0.403781658507118	SMOC2/TNF	2
GO:0090287	regulation of cellular response to growth factor stimulus	8/263	384/18805	0.0208333333333333	1.48962294043093	1.15450408988859	0.171414874925389	0.461628026494488	0.403781658507118	LDLRAD4/SMOC2/GDF15/CREB3L1/SULF2/SPART/CDKN2B/CHRD	8
GO:0016079	synaptic vesicle exocytosis	3/263	102/18805	0.0294117647058824	2.10299709237307	1.33028141488155	0.171562599606326	0.461628026494488	0.403781658507118	FBXL20/STXBP1/RIMS2	3
GO:0034620	cellular response to unfolded protein	3/263	102/18805	0.0294117647058824	2.10299709237307	1.33028141488155	0.171562599606326	0.461628026494488	0.403781658507118	HSPB8/CREB3L1/STC2	3
GO:0035282	segmentation	3/263	102/18805	0.0294117647058824	2.10299709237307	1.33028141488155	0.171562599606326	0.461628026494488	0.403781658507118	FRS2/MAFB/MESP1	3
GO:2001237	negative regulation of extrinsic apoptotic signaling pathway	3/263	102/18805	0.0294117647058824	2.10299709237307	1.33028141488155	0.171562599606326	0.461628026494488	0.403781658507118	GSTP1/KLF4/TNF	3
GO:0001933	negative regulation of protein phosphorylation	5/263	210/18805	0.0238095238095238	1.70242621763534	1.21909338896106	0.17202410499013	0.461628026494488	0.403781658507118	GSTP1/GADD45A/SFN/SOCS1/RGS2	5
GO:0002705	positive regulation of leukocyte mediated immunity	4/263	155/18805	0.0258064516129032	1.84521035201766	1.25839199148412	0.172517785106298	0.461628026494488	0.403781658507118	IL1R1/CADM1/HPX/TNF	4
GO:0032006	regulation of TOR signaling	4/263	155/18805	0.0258064516129032	1.84521035201766	1.25839199148412	0.172517785106298	0.461628026494488	0.403781658507118	PRKACB/SESN3/PIM1/WDR24	4
GO:0072073	kidney epithelium development	4/263	155/18805	0.0258064516129032	1.84521035201766	1.25839199148412	0.172517785106298	0.461628026494488	0.403781658507118	FGFR1/ROBO2/FGFR2/TACSTD2	4
GO:0001836	release of cytochrome c from mitochondria	2/263	54/18805	0.037037037037037	2.64821856076609	1.44452203355761	0.17445636803857	0.461628026494488	0.403781658507118	SFN/TNFSF10	2
GO:0002455	humoral immune response mediated by circulating immunoglobulin	2/263	54/18805	0.037037037037037	2.64821856076609	1.44452203355761	0.17445636803857	0.461628026494488	0.403781658507118	HPX/TNF	2
GO:0002548	monocyte chemotaxis	2/263	54/18805	0.037037037037037	2.64821856076609	1.44452203355761	0.17445636803857	0.461628026494488	0.403781658507118	ANXA1/S100A7	2
GO:0006220	pyrimidine nucleotide metabolic process	2/263	54/18805	0.037037037037037	2.64821856076609	1.44452203355761	0.17445636803857	0.461628026494488	0.403781658507118	ENTPD5/ENTPD4	2
GO:0048286	lung alveolus development	2/263	54/18805	0.037037037037037	2.64821856076609	1.44452203355761	0.17445636803857	0.461628026494488	0.403781658507118	PGR/FGFR2	2
GO:0050873	brown fat cell differentiation	2/263	54/18805	0.037037037037037	2.64821856076609	1.44452203355761	0.17445636803857	0.461628026494488	0.403781658507118	PIM1/RGS2	2
GO:0062237	protein localization to postsynapse	2/263	54/18805	0.037037037037037	2.64821856076609	1.44452203355761	0.17445636803857	0.461628026494488	0.403781658507118	ERBB2/ERBB4	2
GO:0070169	positive regulation of biomineral tissue development	2/263	54/18805	0.037037037037037	2.64821856076609	1.44452203355761	0.17445636803857	0.461628026494488	0.403781658507118	BMPR1B/LTF	2
GO:0071320	cellular response to cAMP	2/263	54/18805	0.037037037037037	2.64821856076609	1.44452203355761	0.17445636803857	0.461628026494488	0.403781658507118	ITPR2/STC1	2
GO:0071622	regulation of granulocyte chemotaxis	2/263	54/18805	0.037037037037037	2.64821856076609	1.44452203355761	0.17445636803857	0.461628026494488	0.403781658507118	S100A7/CXCL8	2
GO:1904263	positive regulation of TORC1 signaling	2/263	54/18805	0.037037037037037	2.64821856076609	1.44452203355761	0.17445636803857	0.461628026494488	0.403781658507118	PIM1/WDR24	2
GO:0070167	regulation of biomineral tissue development	3/263	103/18805	0.029126213592233	2.0825796448743	1.31207647910556	0.17501151259322	0.461628026494488	0.403781658507118	BMPR1B/LTF/ECM1	3
GO:0010508	positive regulation of autophagy	4/263	156/18805	0.0256410256410256	1.83338208053037	1.24481092095977	0.175258608552589	0.461628026494488	0.403781658507118	HSPB8/SESN3/WDR24/SNX30	4
GO:0050730	regulation of peptidyl-tyrosine phosphorylation	4/263	156/18805	0.0256410256410256	1.83338208053037	1.24481092095977	0.175258608552589	0.461628026494488	0.403781658507118	GFRA1/SOCS1/ERBB4/EFNA5	4
GO:0010720	positive regulation of cell development	9/263	447/18805	0.0201342281879195	1.4396355934366	1.12036267577482	0.176035831442018	0.461628026494488	0.403781658507118	KLF10/SOCS1/ANXA1/CXCR4/ROBO2/FN1/RHOH/EFNA5/TNF	9
GO:0051651	maintenance of location in cell	5/263	212/18805	0.0235849056603774	1.68636559294067	1.19694282971039	0.176672220794278	0.461628026494488	0.403781658507118	PGR/CYBA/KDELR3/ITPR2/ANXA6	5
GO:0031960	response to corticosteroid	4/263	157/18805	0.0254777070063694	1.82170448766075	1.23132886933878	0.178014362312419	0.461628026494488	0.403781658507118	ANXA1/STC1/TNF/NR3C1	4
GO:0002699	positive regulation of immune effector process	6/263	270/18805	0.0222222222222222	1.58893113645965	1.16084653624729	0.178339263583083	0.461628026494488	0.403781658507118	IL1R1/STXBP1/CADM1/ANXA1/HPX/TNF	6
GO:0001960	negative regulation of cytokine-mediated signaling pathway	3/263	104/18805	0.0288461538461538	2.06255484059667	1.29407758805395	0.178479823755123	0.461628026494488	0.403781658507118	GSTP1/PYDC1/ECM1	3
GO:0003222	ventricular trabecula myocardium morphogenesis	1/263	14/18805	0.0714285714285714	5.10727865290603	1.83091400499541	0.1790144333062	0.461628026494488	0.403781658507118	MED1	1
GO:0006068	ethanol catabolic process	1/263	14/18805	0.0714285714285714	5.10727865290603	1.83091400499541	0.1790144333062	0.461628026494488	0.403781658507118	ALDH3B2	1
GO:0007638	mechanosensory behavior	1/263	14/18805	0.0714285714285714	5.10727865290603	1.83091400499541	0.1790144333062	0.461628026494488	0.403781658507118	SLITRK6	1
GO:0009133	nucleoside diphosphate biosynthetic process	1/263	14/18805	0.0714285714285714	5.10727865290603	1.83091400499541	0.1790144333062	0.461628026494488	0.403781658507118	AK4	1
GO:0010820	positive regulation of T cell chemotaxis	1/263	14/18805	0.0714285714285714	5.10727865290603	1.83091400499541	0.1790144333062	0.461628026494488	0.403781658507118	S100A7	1
GO:0014733	regulation of skeletal muscle adaptation	1/263	14/18805	0.0714285714285714	5.10727865290603	1.83091400499541	0.1790144333062	0.461628026494488	0.403781658507118	TNNT1	1
GO:0015803	branched-chain amino acid transport	1/263	14/18805	0.0714285714285714	5.10727865290603	1.83091400499541	0.1790144333062	0.461628026494488	0.403781658507118	SLC43A1	1
GO:0030011	maintenance of cell polarity	1/263	14/18805	0.0714285714285714	5.10727865290603	1.83091400499541	0.1790144333062	0.461628026494488	0.403781658507118	PDLIM1	1
GO:0030497	fatty acid elongation	1/263	14/18805	0.0714285714285714	5.10727865290603	1.83091400499541	0.1790144333062	0.461628026494488	0.403781658507118	HACD4	1
GO:0033079	immature T cell proliferation	1/263	14/18805	0.0714285714285714	5.10727865290603	1.83091400499541	0.1790144333062	0.461628026494488	0.403781658507118	ERBB2	1
GO:0033080	immature T cell proliferation in thymus	1/263	14/18805	0.0714285714285714	5.10727865290603	1.83091400499541	0.1790144333062	0.461628026494488	0.403781658507118	ERBB2	1
GO:0033262	regulation of nuclear cell cycle DNA replication	1/263	14/18805	0.0714285714285714	5.10727865290603	1.83091400499541	0.1790144333062	0.461628026494488	0.403781658507118	FGFR1	1
GO:0034116	positive regulation of heterotypic cell-cell adhesion	1/263	14/18805	0.0714285714285714	5.10727865290603	1.83091400499541	0.1790144333062	0.461628026494488	0.403781658507118	TNF	1
GO:0035542	regulation of SNARE complex assembly	1/263	14/18805	0.0714285714285714	5.10727865290603	1.83091400499541	0.1790144333062	0.461628026494488	0.403781658507118	STXBP1	1
GO:0035630	bone mineralization involved in bone maturation	1/263	14/18805	0.0714285714285714	5.10727865290603	1.83091400499541	0.1790144333062	0.461628026494488	0.403781658507118	LTF	1
GO:0035970	peptidyl-threonine dephosphorylation	1/263	14/18805	0.0714285714285714	5.10727865290603	1.83091400499541	0.1790144333062	0.461628026494488	0.403781658507118	DUSP5	1
GO:0042541	hemoglobin biosynthetic process	1/263	14/18805	0.0714285714285714	5.10727865290603	1.83091400499541	0.1790144333062	0.461628026494488	0.403781658507118	KLF4	1
GO:0042559	pteridine-containing compound biosynthetic process	1/263	14/18805	0.0714285714285714	5.10727865290603	1.83091400499541	0.1790144333062	0.461628026494488	0.403781658507118	QDPR	1
GO:0042711	maternal behavior	1/263	14/18805	0.0714285714285714	5.10727865290603	1.83091400499541	0.1790144333062	0.461628026494488	0.403781658507118	NR3C1	1
GO:0043306	positive regulation of mast cell degranulation	1/263	14/18805	0.0714285714285714	5.10727865290603	1.83091400499541	0.1790144333062	0.461628026494488	0.403781658507118	STXBP1	1
GO:0043353	enucleate erythrocyte differentiation	1/263	14/18805	0.0714285714285714	5.10727865290603	1.83091400499541	0.1790144333062	0.461628026494488	0.403781658507118	MED1	1
GO:0043650	dicarboxylic acid biosynthetic process	1/263	14/18805	0.0714285714285714	5.10727865290603	1.83091400499541	0.1790144333062	0.461628026494488	0.403781658507118	KYNU	1
GO:0045091	regulation of single stranded viral RNA replication via double stranded DNA intermediate	1/263	14/18805	0.0714285714285714	5.10727865290603	1.83091400499541	0.1790144333062	0.461628026494488	0.403781658507118	CXCL8	1
GO:0045837	negative regulation of membrane potential	1/263	14/18805	0.0714285714285714	5.10727865290603	1.83091400499541	0.1790144333062	0.461628026494488	0.403781658507118	LTF	1
GO:0045986	negative regulation of smooth muscle contraction	1/263	14/18805	0.0714285714285714	5.10727865290603	1.83091400499541	0.1790144333062	0.461628026494488	0.403781658507118	RGS2	1
GO:0045989	positive regulation of striated muscle contraction	1/263	14/18805	0.0714285714285714	5.10727865290603	1.83091400499541	0.1790144333062	0.461628026494488	0.403781658507118	RGS2	1
GO:0046348	amino sugar catabolic process	1/263	14/18805	0.0714285714285714	5.10727865290603	1.83091400499541	0.1790144333062	0.461628026494488	0.403781658507118	CHI3L2	1
GO:0048715	negative regulation of oligodendrocyte differentiation	1/263	14/18805	0.0714285714285714	5.10727865290603	1.83091400499541	0.1790144333062	0.461628026494488	0.403781658507118	TMEM98	1
GO:0051000	positive regulation of nitric-oxide synthase activity	1/263	14/18805	0.0714285714285714	5.10727865290603	1.83091400499541	0.1790144333062	0.461628026494488	0.403781658507118	S100A1	1
GO:0051444	negative regulation of ubiquitin-protein transferase activity	1/263	14/18805	0.0714285714285714	5.10727865290603	1.83091400499541	0.1790144333062	0.461628026494488	0.403781658507118	RPL23	1
GO:0060354	negative regulation of cell adhesion molecule production	1/263	14/18805	0.0714285714285714	5.10727865290603	1.83091400499541	0.1790144333062	0.461628026494488	0.403781658507118	CXCL8	1
GO:0060816	random inactivation of X chromosome	1/263	14/18805	0.0714285714285714	5.10727865290603	1.83091400499541	0.1790144333062	0.461628026494488	0.403781658507118	XIST	1
GO:0060911	cardiac cell fate commitment	1/263	14/18805	0.0714285714285714	5.10727865290603	1.83091400499541	0.1790144333062	0.461628026494488	0.403781658507118	MESP1	1
GO:0070307	lens fiber cell development	1/263	14/18805	0.0714285714285714	5.10727865290603	1.83091400499541	0.1790144333062	0.461628026494488	0.403781658507118	FRS2	1
GO:0070365	hepatocyte differentiation	1/263	14/18805	0.0714285714285714	5.10727865290603	1.83091400499541	0.1790144333062	0.461628026494488	0.403781658507118	MESP1	1
GO:0070493	thrombin-activated receptor signaling pathway	1/263	14/18805	0.0714285714285714	5.10727865290603	1.83091400499541	0.1790144333062	0.461628026494488	0.403781658507118	IQGAP2	1
GO:0071679	commissural neuron axon guidance	1/263	14/18805	0.0714285714285714	5.10727865290603	1.83091400499541	0.1790144333062	0.461628026494488	0.403781658507118	NELL2	1
GO:0072393	microtubule anchoring at microtubule organizing center	1/263	14/18805	0.0714285714285714	5.10727865290603	1.83091400499541	0.1790144333062	0.461628026494488	0.403781658507118	PCM1	1
GO:0072683	T cell extravasation	1/263	14/18805	0.0714285714285714	5.10727865290603	1.83091400499541	0.1790144333062	0.461628026494488	0.403781658507118	CD99	1
GO:1900044	regulation of protein K63-linked ubiquitination	1/263	14/18805	0.0714285714285714	5.10727865290603	1.83091400499541	0.1790144333062	0.461628026494488	0.403781658507118	SASH1	1
GO:1900426	positive regulation of defense response to bacterium	1/263	14/18805	0.0714285714285714	5.10727865290603	1.83091400499541	0.1790144333062	0.461628026494488	0.403781658507118	CYBA	1
GO:1901993	regulation of meiotic cell cycle phase transition	1/263	14/18805	0.0714285714285714	5.10727865290603	1.83091400499541	0.1790144333062	0.461628026494488	0.403781658507118	OVOL1	1
GO:1904031	positive regulation of cyclin-dependent protein kinase activity	1/263	14/18805	0.0714285714285714	5.10727865290603	1.83091400499541	0.1790144333062	0.461628026494488	0.403781658507118	PIM1	1
GO:1904321	response to forskolin	1/263	14/18805	0.0714285714285714	5.10727865290603	1.83091400499541	0.1790144333062	0.461628026494488	0.403781658507118	EFNA5	1
GO:1904322	cellular response to forskolin	1/263	14/18805	0.0714285714285714	5.10727865290603	1.83091400499541	0.1790144333062	0.461628026494488	0.403781658507118	EFNA5	1
GO:1904350	regulation of protein catabolic process in the vacuole	1/263	14/18805	0.0714285714285714	5.10727865290603	1.83091400499541	0.1790144333062	0.461628026494488	0.403781658507118	ATP13A2	1
GO:1905208	negative regulation of cardiocyte differentiation	1/263	14/18805	0.0714285714285714	5.10727865290603	1.83091400499541	0.1790144333062	0.461628026494488	0.403781658507118	FRS2	1
GO:1905809	negative regulation of synapse organization	1/263	14/18805	0.0714285714285714	5.10727865290603	1.83091400499541	0.1790144333062	0.461628026494488	0.403781658507118	ROBO2	1
GO:2000105	positive regulation of DNA-templated DNA replication	1/263	14/18805	0.0714285714285714	5.10727865290603	1.83091400499541	0.1790144333062	0.461628026494488	0.403781658507118	FGFR1	1
GO:0051223	regulation of protein transport	9/263	449/18805	0.0200445434298441	1.43322296273087	1.10654816217919	0.179186992382492	0.461628026494488	0.403781658507118	PCM1/RAB11FIP1/ATP13A2/JUP/SFN/SLC30A8/SERGEF/EFNA5/TNF	9
GO:0034198	cellular response to amino acid starvation	2/263	55/18805	0.0363636363636364	2.60006913238852	1.41528584465327	0.179467527143988	0.461628026494488	0.403781658507118	SESN3/WDR24	2
GO:0042743	hydrogen peroxide metabolic process	2/263	55/18805	0.0363636363636364	2.60006913238852	1.41528584465327	0.179467527143988	0.461628026494488	0.403781658507118	CYBA/PXDNL	2
GO:0045778	positive regulation of ossification	2/263	55/18805	0.0363636363636364	2.60006913238852	1.41528584465327	0.179467527143988	0.461628026494488	0.403781658507118	BMPR1B/LTF	2
GO:0060425	lung morphogenesis	2/263	55/18805	0.0363636363636364	2.60006913238852	1.41528584465327	0.179467527143988	0.461628026494488	0.403781658507118	FGFR2/TNF	2
GO:0001818	negative regulation of cytokine production	8/263	389/18805	0.0205655526992288	1.47047611600379	1.11670750724313	0.17986790850989	0.46229700354141	0.40436680638811	GSTP1/KLF4/LTF/FGFR1/ANXA1/FN1/TNF/NDRG2	8
GO:0010563	negative regulation of phosphorus metabolic process	6/263	271/18805	0.022140221402214	1.58306792193397	1.15144691928727	0.180406719622299	0.462574774439853	0.404609769959689	GSTP1/GADD45A/SFN/SOCS1/RGS2/CDKN2B	6
GO:0045936	negative regulation of phosphate metabolic process	6/263	271/18805	0.022140221402214	1.58306792193397	1.15144691928727	0.180406719622299	0.462574774439853	0.404609769959689	GSTP1/GADD45A/SFN/SOCS1/RGS2/CDKN2B	6
GO:0043123	positive regulation of canonical NF-kappaB signal transduction	5/263	214/18805	0.0233644859813084	1.67060516683842	1.17502501836252	0.181367754564679	0.462574774439853	0.404609769959689	LGALS1/LTF/ECM1/TNFSF10/TNF	5
GO:0050777	negative regulation of immune response	5/263	214/18805	0.0233644859813084	1.67060516683842	1.17502501836252	0.181367754564679	0.462574774439853	0.404609769959689	LGALS1/SFN/PIM1/ANXA1/ASCL2	5
GO:0008593	regulation of Notch signaling pathway	3/263	105/18805	0.0285714285714286	2.04291146116241	1.27628008798269	0.181966975599898	0.462574774439853	0.404609769959689	EGFL7/MESP1/ROBO2	3
GO:0032602	chemokine production	3/263	105/18805	0.0285714285714286	2.04291146116241	1.27628008798269	0.181966975599898	0.462574774439853	0.404609769959689	GSTP1/KLF4/TNF	3
GO:0032637	interleukin-8 production	3/263	105/18805	0.0285714285714286	2.04291146116241	1.27628008798269	0.181966975599898	0.462574774439853	0.404609769959689	KLF4/ANXA1/TNF	3
GO:0032642	regulation of chemokine production	3/263	105/18805	0.0285714285714286	2.04291146116241	1.27628008798269	0.181966975599898	0.462574774439853	0.404609769959689	GSTP1/KLF4/TNF	3
GO:0032677	regulation of interleukin-8 production	3/263	105/18805	0.0285714285714286	2.04291146116241	1.27628008798269	0.181966975599898	0.462574774439853	0.404609769959689	KLF4/ANXA1/TNF	3
GO:0021953	central nervous system neuron differentiation	5/263	215/18805	0.0232558139534884	1.66283491024847	1.16415180541682	0.183732917733041	0.462574774439853	0.404609769959689	BMPR1B/ERBB4/ROBO2/FGFR2/NANOS1	5
GO:0001738	morphogenesis of a polarized epithelium	2/263	56/18805	0.0357142857142857	2.55363932645301	1.38669155875822	0.184500438391892	0.462574774439853	0.404609769959689	ERBB4/FZD6	2
GO:0007187	G protein-coupled receptor signaling pathway, coupled to cyclic nucleotide second messenger	2/263	56/18805	0.0357142857142857	2.55363932645301	1.38669155875822	0.184500438391892	0.462574774439853	0.404609769959689	NPY1R/ANXA1	2
GO:0007528	neuromuscular junction development	2/263	56/18805	0.0357142857142857	2.55363932645301	1.38669155875822	0.184500438391892	0.462574774439853	0.404609769959689	FARP1/ERBB2	2
GO:0010719	negative regulation of epithelial to mesenchymal transition	2/263	56/18805	0.0357142857142857	2.55363932645301	1.38669155875822	0.184500438391892	0.462574774439853	0.404609769959689	LDLRAD4/HPN	2
GO:0046638	positive regulation of alpha-beta T cell differentiation	2/263	56/18805	0.0357142857142857	2.55363932645301	1.38669155875822	0.184500438391892	0.462574774439853	0.404609769959689	SOCS1/ANXA1	2
GO:0046854	phosphatidylinositol phosphate biosynthetic process	2/263	56/18805	0.0357142857142857	2.55363932645301	1.38669155875822	0.184500438391892	0.462574774439853	0.404609769959689	PIK3C2G/IMPA2	2
GO:1900087	positive regulation of G1/S transition of mitotic cell cycle	2/263	56/18805	0.0357142857142857	2.55363932645301	1.38669155875822	0.184500438391892	0.462574774439853	0.404609769959689	ANXA1/CDC6	2
GO:0032386	regulation of intracellular transport	6/263	273/18805	0.021978021978022	1.57147035474032	1.13276178974993	0.184570495677652	0.462574774439853	0.404609769959689	PCM1/ATP13A2/JUP/SFN/NEFH/REEP6	6
GO:0050708	regulation of protein secretion	6/263	273/18805	0.021978021978022	1.57147035474032	1.13276178974993	0.184570495677652	0.462574774439853	0.404609769959689	RAB11FIP1/ATP13A2/SLC30A8/SERGEF/EFNA5/TNF	6
GO:0008585	female gonad development	3/263	106/18805	0.0283018867924528	2.0236387115288	1.2586794753878	0.185472413220922	0.462574774439853	0.404609769959689	BMPR1B/PGR/ROBO2	3
GO:0008630	intrinsic apoptotic signaling pathway in response to DNA damage	3/263	106/18805	0.0283018867924528	2.0236387115288	1.2586794753878	0.185472413220922	0.462574774439853	0.404609769959689	SNAI1/SFN/TNF	3
GO:0032526	response to retinoic acid	3/263	106/18805	0.0283018867924528	2.0236387115288	1.2586794753878	0.185472413220922	0.462574774439853	0.404609769959689	KLF4/FGFR2/TNF	3
GO:0016525	negative regulation of angiogenesis	4/263	160/18805	0.025	1.78754752851711	1.19146222456815	0.186368534600048	0.462574774439853	0.404609769959689	KLF4/GADD45A/CREB3L1/TNF	4
GO:0035264	multicellular organism growth	4/263	160/18805	0.025	1.78754752851711	1.19146222456815	0.186368534600048	0.462574774439853	0.404609769959689	NPY1R/SLITRK6/GDF15/STC2	4
GO:0060070	canonical Wnt signaling pathway	7/263	333/18805	0.021021021021021	1.50304296692129	1.10304935601198	0.186682419553175	0.462574774439853	0.404609769959689	KLF4/SNAI1/JUP/MESP1/SULF2/FZD6/FGFR2	7
GO:0030522	intracellular receptor signaling pathway	8/263	393/18805	0.0203562340966921	1.45550943797831	1.08684566885722	0.186760286935827	0.462574774439853	0.404609769959689	MED1/PGR/PIM1/TNF/PRCP/LBH/NR3C1/SCGB2A2	8
GO:0046394	carboxylic acid biosynthetic process	7/263	334/18805	0.0209580838323353	1.49854283827782	1.09485150134565	0.18858107749375	0.462574774439853	0.404609769959689	GSTP1/HACD4/PLOD2/FADS1/KYNU/FADS2/FASN	7
GO:0002532	production of molecular mediator involved in inflammatory response	3/263	107/18805	0.0280373831775701	2.00472620020611	1.24127139076077	0.188995584459599	0.462574774439853	0.404609769959689	TNF/FADS2/S100A9	3
GO:0008637	apoptotic mitochondrial changes	3/263	107/18805	0.0280373831775701	2.00472620020611	1.24127139076077	0.188995584459599	0.462574774439853	0.404609769959689	SFN/TNFSF10/ERBB4	3
GO:0045639	positive regulation of myeloid cell differentiation	3/263	107/18805	0.0280373831775701	2.00472620020611	1.24127139076077	0.188995584459599	0.462574774439853	0.404609769959689	MED1/KLF10/TNF	3
GO:1901222	regulation of non-canonical NF-kappaB signal transduction	3/263	107/18805	0.0280373831775701	2.00472620020611	1.24127139076077	0.188995584459599	0.462574774439853	0.404609769959689	SASH1/NLRP2/TNF	3
GO:0007043	cell-cell junction assembly	4/263	161/18805	0.0248447204968944	1.77644474883688	1.17836179998605	0.189181335717977	0.462574774439853	0.404609769959689	SNAI1/JUP/RAMP2/TNF	4
GO:0000381	regulation of alternative mRNA splicing, via spliceosome	2/263	57/18805	0.0350877192982456	2.50883863651524	1.35871214987708	0.189553521403806	0.462574774439853	0.404609769959689	RBPMS/NOVA1	2
GO:0002762	negative regulation of myeloid leukocyte differentiation	2/263	57/18805	0.0350877192982456	2.50883863651524	1.35871214987708	0.189553521403806	0.462574774439853	0.404609769959689	LTF/MAFB	2
GO:0031529	ruffle organization	2/263	57/18805	0.0350877192982456	2.50883863651524	1.35871214987708	0.189553521403806	0.462574774439853	0.404609769959689	EVL/TACSTD2	2
GO:0051703	biological process involved in intraspecies interaction between organisms	2/263	57/18805	0.0350877192982456	2.50883863651524	1.35871214987708	0.189553521403806	0.462574774439853	0.404609769959689	PCM1/LTF	2
GO:1903037	regulation of leukocyte cell-cell adhesion	8/263	395/18805	0.020253164556962	1.44813976993791	1.07203717975898	0.190248648695012	0.462574774439853	0.404609769959689	KLF4/LGALS1/ERBB2/SOCS1/ANXA1/ASCL2/RHOH/TNF	8
GO:0001711	endodermal cell fate commitment	1/263	15/18805	0.0666666666666667	4.76679340937896	1.73811596422505	0.190504998153226	0.462574774439853	0.404609769959689	MESP1	1
GO:0003198	epithelial to mesenchymal transition involved in endocardial cushion formation	1/263	15/18805	0.0666666666666667	4.76679340937896	1.73811596422505	0.190504998153226	0.462574774439853	0.404609769959689	SNAI1	1
GO:0006067	ethanol metabolic process	1/263	15/18805	0.0666666666666667	4.76679340937896	1.73811596422505	0.190504998153226	0.462574774439853	0.404609769959689	ALDH3B2	1
GO:0010819	regulation of T cell chemotaxis	1/263	15/18805	0.0666666666666667	4.76679340937896	1.73811596422505	0.190504998153226	0.462574774439853	0.404609769959689	S100A7	1
GO:0014004	microglia differentiation	1/263	15/18805	0.0666666666666667	4.76679340937896	1.73811596422505	0.190504998153226	0.462574774439853	0.404609769959689	NR3C1	1
GO:0015846	polyamine transport	1/263	15/18805	0.0666666666666667	4.76679340937896	1.73811596422505	0.190504998153226	0.462574774439853	0.404609769959689	ATP13A2	1
GO:0017014	protein nitrosylation	1/263	15/18805	0.0666666666666667	4.76679340937896	1.73811596422505	0.190504998153226	0.462574774439853	0.404609769959689	S100A9	1
GO:0018119	peptidyl-cysteine S-nitrosylation	1/263	15/18805	0.0666666666666667	4.76679340937896	1.73811596422505	0.190504998153226	0.462574774439853	0.404609769959689	S100A9	1
GO:0021859	pyramidal neuron differentiation	1/263	15/18805	0.0666666666666667	4.76679340937896	1.73811596422505	0.190504998153226	0.462574774439853	0.404609769959689	FGFR2	1
GO:0032352	positive regulation of hormone metabolic process	1/263	15/18805	0.0666666666666667	4.76679340937896	1.73811596422505	0.190504998153226	0.462574774439853	0.404609769959689	HPN	1
GO:0032621	interleukin-18 production	1/263	15/18805	0.0666666666666667	4.76679340937896	1.73811596422505	0.190504998153226	0.462574774439853	0.404609769959689	TNF	1
GO:0032661	regulation of interleukin-18 production	1/263	15/18805	0.0666666666666667	4.76679340937896	1.73811596422505	0.190504998153226	0.462574774439853	0.404609769959689	TNF	1
GO:0033147	negative regulation of intracellular estrogen receptor signaling pathway	1/263	15/18805	0.0666666666666667	4.76679340937896	1.73811596422505	0.190504998153226	0.462574774439853	0.404609769959689	LBH	1
GO:0034333	adherens junction assembly	1/263	15/18805	0.0666666666666667	4.76679340937896	1.73811596422505	0.190504998153226	0.462574774439853	0.404609769959689	RAMP2	1
GO:0036151	phosphatidylcholine acyl-chain remodeling	1/263	15/18805	0.0666666666666667	4.76679340937896	1.73811596422505	0.190504998153226	0.462574774439853	0.404609769959689	MBOAT2	1
GO:0039692	single stranded viral RNA replication via double stranded DNA intermediate	1/263	15/18805	0.0666666666666667	4.76679340937896	1.73811596422505	0.190504998153226	0.462574774439853	0.404609769959689	CXCL8	1
GO:0043201	response to L-leucine	1/263	15/18805	0.0666666666666667	4.76679340937896	1.73811596422505	0.190504998153226	0.462574774439853	0.404609769959689	SESN3	1
GO:0043374	CD8-positive, alpha-beta T cell differentiation	1/263	15/18805	0.0666666666666667	4.76679340937896	1.73811596422505	0.190504998153226	0.462574774439853	0.404609769959689	SOCS1	1
GO:0043518	negative regulation of DNA damage response, signal transduction by p53 class mediator	1/263	15/18805	0.0666666666666667	4.76679340937896	1.73811596422505	0.190504998153226	0.462574774439853	0.404609769959689	SNAI1	1
GO:0044070	regulation of monoatomic anion transport	1/263	15/18805	0.0666666666666667	4.76679340937896	1.73811596422505	0.190504998153226	0.462574774439853	0.404609769959689	STC1	1
GO:0047484	regulation of response to osmotic stress	1/263	15/18805	0.0666666666666667	4.76679340937896	1.73811596422505	0.190504998153226	0.462574774439853	0.404609769959689	EFHD1	1
GO:0048935	peripheral nervous system neuron development	1/263	15/18805	0.0666666666666667	4.76679340937896	1.73811596422505	0.190504998153226	0.462574774439853	0.404609769959689	NEFH	1
GO:0050930	induction of positive chemotaxis	1/263	15/18805	0.0666666666666667	4.76679340937896	1.73811596422505	0.190504998153226	0.462574774439853	0.404609769959689	CXCL8	1
GO:0060026	convergent extension	1/263	15/18805	0.0666666666666667	4.76679340937896	1.73811596422505	0.190504998153226	0.462574774439853	0.404609769959689	MESP1	1
GO:0060572	morphogenesis of an epithelial bud	1/263	15/18805	0.0666666666666667	4.76679340937896	1.73811596422505	0.190504998153226	0.462574774439853	0.404609769959689	FGFR2	1
GO:0060746	parental behavior	1/263	15/18805	0.0666666666666667	4.76679340937896	1.73811596422505	0.190504998153226	0.462574774439853	0.404609769959689	NR3C1	1
GO:0070142	synaptic vesicle budding	1/263	15/18805	0.0666666666666667	4.76679340937896	1.73811596422505	0.190504998153226	0.462574774439853	0.404609769959689	MX1	1
GO:0071361	cellular response to ethanol	1/263	15/18805	0.0666666666666667	4.76679340937896	1.73811596422505	0.190504998153226	0.462574774439853	0.404609769959689	ITPR2	1
GO:0071599	otic vesicle development	1/263	15/18805	0.0666666666666667	4.76679340937896	1.73811596422505	0.190504998153226	0.462574774439853	0.404609769959689	FGFR2	1
GO:0071696	ectodermal placode development	1/263	15/18805	0.0666666666666667	4.76679340937896	1.73811596422505	0.190504998153226	0.462574774439853	0.404609769959689	FRS2	1
GO:0086069	bundle of His cell to Purkinje myocyte communication	1/263	15/18805	0.0666666666666667	4.76679340937896	1.73811596422505	0.190504998153226	0.462574774439853	0.404609769959689	JUP	1
GO:0090030	regulation of steroid hormone biosynthetic process	1/263	15/18805	0.0666666666666667	4.76679340937896	1.73811596422505	0.190504998153226	0.462574774439853	0.404609769959689	NR3C1	1
GO:0099550	trans-synaptic signaling, modulating synaptic transmission	1/263	15/18805	0.0666666666666667	4.76679340937896	1.73811596422505	0.190504998153226	0.462574774439853	0.404609769959689	PLAT	1
GO:1901203	positive regulation of extracellular matrix assembly	1/263	15/18805	0.0666666666666667	4.76679340937896	1.73811596422505	0.190504998153226	0.462574774439853	0.404609769959689	PHLDB2	1
GO:1901741	positive regulation of myoblast fusion	1/263	15/18805	0.0666666666666667	4.76679340937896	1.73811596422505	0.190504998153226	0.462574774439853	0.404609769959689	GDF15	1
GO:1903543	positive regulation of exosomal secretion	1/263	15/18805	0.0666666666666667	4.76679340937896	1.73811596422505	0.190504998153226	0.462574774439853	0.404609769959689	ATP13A2	1
GO:2000328	regulation of T-helper 17 cell lineage commitment	1/263	15/18805	0.0666666666666667	4.76679340937896	1.73811596422505	0.190504998153226	0.462574774439853	0.404609769959689	LGALS1	1
GO:2001256	regulation of store-operated calcium entry	1/263	15/18805	0.0666666666666667	4.76679340937896	1.73811596422505	0.190504998153226	0.462574774439853	0.404609769959689	STC2	1
GO:2000181	negative regulation of blood vessel morphogenesis	4/263	162/18805	0.0246913580246914	1.76547904051073	1.16535332180526	0.192007727456675	0.46578995778376	0.40742206035043	KLF4/GADD45A/CREB3L1/TNF	4
GO:0001938	positive regulation of endothelial cell proliferation	3/263	108/18805	0.0277777777777778	1.98616392057457	1.22405161265994	0.192535940061147	0.46578995778376	0.40742206035043	EGFL7/ECM1/FGFR1	3
GO:0002377	immunoglobulin production	3/263	108/18805	0.0277777777777778	1.98616392057457	1.22405161265994	0.192535940061147	0.46578995778376	0.40742206035043	HPX/TNF/BATF	3
GO:0007631	feeding behavior	3/263	108/18805	0.0277777777777778	1.98616392057457	1.22405161265994	0.192535940061147	0.46578995778376	0.40742206035043	NPY1R/NPW/GDF15	3
GO:0097306	cellular response to alcohol	3/263	108/18805	0.0277777777777778	1.98616392057457	1.22405161265994	0.192535940061147	0.46578995778376	0.40742206035043	JUP/ITPR2/EFNA5	3
GO:0009952	anterior/posterior pattern specification	5/263	219/18805	0.0228310502283105	1.63246349636266	1.12121593832108	0.193305903334634	0.467309575559514	0.408751255612795	FRS2/MESP1/CELSR2/ETS2/HES6	5
GO:0016053	organic acid biosynthetic process	7/263	337/18805	0.0207715133531157	1.48520269431689	1.07041682909311	0.194324373138594	0.467946294798895	0.409308187895336	GSTP1/HACD4/PLOD2/FADS1/KYNU/FADS2/FASN	7
GO:0001755	neural crest cell migration	2/263	58/18805	0.0344827586206897	2.46558279795463	1.33132219729837	0.194625235435733	0.467946294798895	0.409308187895336	ERBB4/FN1	2
GO:0015804	neutral amino acid transport	2/263	58/18805	0.0344827586206897	2.46558279795463	1.33132219729837	0.194625235435733	0.467946294798895	0.409308187895336	RGS2/SLC43A1	2
GO:0032507	maintenance of protein location in cell	2/263	58/18805	0.0344827586206897	2.46558279795463	1.33132219729837	0.194625235435733	0.467946294798895	0.409308187895336	PGR/KDELR3	2
GO:0032786	positive regulation of DNA-templated transcription, elongation	2/263	58/18805	0.0344827586206897	2.46558279795463	1.33132219729837	0.194625235435733	0.467946294798895	0.409308187895336	MED1/CDK12	2
GO:0035315	hair cell differentiation	2/263	58/18805	0.0344827586206897	2.46558279795463	1.33132219729837	0.194625235435733	0.467946294798895	0.409308187895336	SLITRK6/FGFR1	2
GO:1990928	response to amino acid starvation	2/263	58/18805	0.0344827586206897	2.46558279795463	1.33132219729837	0.194625235435733	0.467946294798895	0.409308187895336	SESN3/WDR24	2
GO:0008277	regulation of G protein-coupled receptor signaling pathway	4/263	163/18805	0.0245398773006135	1.75464788075299	1.15243546370795	0.194847440505033	0.467946294798895	0.409308187895336	KLK14/RGS2/RAMP2/CXCL8	4
GO:0050729	positive regulation of inflammatory response	4/263	163/18805	0.0245398773006135	1.75464788075299	1.15243546370795	0.194847440505033	0.467946294798895	0.409308187895336	LGALS1/TNF/OSMR/S100A9	4
GO:0045637	regulation of myeloid cell differentiation	5/263	220/18805	0.0227272727272727	1.62504320774283	1.11061824821396	0.195726444725093	0.469714956568959	0.410855219578567	MED1/KLF10/LTF/MAFB/TNF	5
GO:0003333	amino acid transmembrane transport	3/263	109/18805	0.0275229357798165	1.96794223322985	1.20701605207885	0.196092933823834	0.469909975963296	0.411025801193996	RGS2/TNF/SLC43A1	3
GO:0048709	oligodendrocyte differentiation	3/263	109/18805	0.0275229357798165	1.96794223322985	1.20701605207885	0.196092933823834	0.469909975963296	0.411025801193996	TMEM98/ERBB2/CXCR4	3
GO:0141091	transforming growth factor beta receptor superfamily signaling pathway	8/263	399/18805	0.0200501253132832	1.43362207800871	1.04266028720504	0.19730756613811	0.471330585545487	0.412268394928055	BMPR1B/LDLRAD4/GDF15/ID1/FMOD/SPART/CDKN2B/CHRD	8
GO:1901343	negative regulation of vasculature development	4/263	164/18805	0.024390243902439	1.74394880830938	1.13960692692149	0.197700205273358	0.471330585545487	0.412268394928055	KLF4/GADD45A/CREB3L1/TNF	4
GO:0006486	protein glycosylation	5/263	221/18805	0.0226244343891403	1.61769007105621	1.10007391295972	0.198157586340156	0.471330585545487	0.412268394928055	GALNT3/TUSC3/GALNT7/SLC39A8/ENTPD5	5
GO:0043413	macromolecule glycosylation	5/263	221/18805	0.0226244343891403	1.61769007105621	1.10007391295972	0.198157586340156	0.471330585545487	0.412268394928055	GALNT3/TUSC3/GALNT7/SLC39A8/ENTPD5	5
GO:0046545	development of primary female sexual characteristics	3/263	110/18805	0.0272727272727273	1.95005184929139	1.19016074709432	0.199666022741833	0.471330585545487	0.412268394928055	BMPR1B/PGR/ROBO2	3
GO:0060986	endocrine hormone secretion	2/263	59/18805	0.0338983050847458	2.42379325900625	1.30449776402365	0.199714078585808	0.471330585545487	0.412268394928055	RAB11FIP1/FGFR1	2
GO:0006865	amino acid transport	4/263	165/18805	0.0242424242424242	1.73337942159235	1.12686643947838	0.200565751967265	0.471330585545487	0.412268394928055	STXBP1/RGS2/TNF/SLC43A1	4
GO:0007601	visual perception	5/263	222/18805	0.0225225225225225	1.61040317884424	1.08958237013493	0.200599168161078	0.471330585545487	0.412268394928055	SLITRK6/TIMP3/TACSTD2/COL18A1/REEP6	5
GO:0099504	synaptic vesicle cycle	5/263	222/18805	0.0225225225225225	1.61040317884424	1.08958237013493	0.200599168161078	0.471330585545487	0.412268394928055	FBXL20/MX1/STXBP1/RIMS2/SNCG	5
GO:0006704	glucocorticoid biosynthetic process	1/263	16/18805	0.0625	4.46886882129278	1.6531822821854	0.201835343309464	0.471330585545487	0.412268394928055	NR3C1	1
GO:0006825	copper ion transport	1/263	16/18805	0.0625	4.46886882129278	1.6531822821854	0.201835343309464	0.471330585545487	0.412268394928055	STEAP2	1
GO:0010226	response to lithium ion	1/263	16/18805	0.0625	4.46886882129278	1.6531822821854	0.201835343309464	0.471330585545487	0.412268394928055	IMPA2	1
GO:0018126	protein hydroxylation	1/263	16/18805	0.0625	4.46886882129278	1.6531822821854	0.201835343309464	0.471330585545487	0.412268394928055	PLOD2	1
GO:0021513	spinal cord dorsal/ventral patterning	1/263	16/18805	0.0625	4.46886882129278	1.6531822821854	0.201835343309464	0.471330585545487	0.412268394928055	CHRD	1
GO:0021819	layer formation in cerebral cortex	1/263	16/18805	0.0625	4.46886882129278	1.6531822821854	0.201835343309464	0.471330585545487	0.412268394928055	SOCS7	1
GO:0031665	negative regulation of lipopolysaccharide-mediated signaling pathway	1/263	16/18805	0.0625	4.46886882129278	1.6531822821854	0.201835343309464	0.471330585545487	0.412268394928055	LTF	1
GO:0032354	response to follicle-stimulating hormone	1/263	16/18805	0.0625	4.46886882129278	1.6531822821854	0.201835343309464	0.471330585545487	0.412268394928055	EFNA5	1
GO:0032780	negative regulation of ATP-dependent activity	1/263	16/18805	0.0625	4.46886882129278	1.6531822821854	0.201835343309464	0.471330585545487	0.412268394928055	LTF	1
GO:0034616	response to laminar fluid shear stress	1/263	16/18805	0.0625	4.46886882129278	1.6531822821854	0.201835343309464	0.471330585545487	0.412268394928055	KLF4	1
GO:0035729	cellular response to hepatocyte growth factor stimulus	1/263	16/18805	0.0625	4.46886882129278	1.6531822821854	0.201835343309464	0.471330585545487	0.412268394928055	MED1	1
GO:0045956	positive regulation of calcium ion-dependent exocytosis	1/263	16/18805	0.0625	4.46886882129278	1.6531822821854	0.201835343309464	0.471330585545487	0.412268394928055	STXBP1	1
GO:0046036	CTP metabolic process	1/263	16/18805	0.0625	4.46886882129278	1.6531822821854	0.201835343309464	0.471330585545487	0.412268394928055	ENTPD4	1
GO:0046321	positive regulation of fatty acid oxidation	1/263	16/18805	0.0625	4.46886882129278	1.6531822821854	0.201835343309464	0.471330585545487	0.412268394928055	GDF15	1
GO:0046325	negative regulation of D-glucose import	1/263	16/18805	0.0625	4.46886882129278	1.6531822821854	0.201835343309464	0.471330585545487	0.412268394928055	TNF	1
GO:0048934	peripheral nervous system neuron differentiation	1/263	16/18805	0.0625	4.46886882129278	1.6531822821854	0.201835343309464	0.471330585545487	0.412268394928055	NEFH	1
GO:0050665	hydrogen peroxide biosynthetic process	1/263	16/18805	0.0625	4.46886882129278	1.6531822821854	0.201835343309464	0.471330585545487	0.412268394928055	CYBA	1
GO:0051895	negative regulation of focal adhesion assembly	1/263	16/18805	0.0625	4.46886882129278	1.6531822821854	0.201835343309464	0.471330585545487	0.412268394928055	PHLDB2	1
GO:0060080	inhibitory postsynaptic potential	1/263	16/18805	0.0625	4.46886882129278	1.6531822821854	0.201835343309464	0.471330585545487	0.412268394928055	RIMS2	1
GO:0061635	regulation of protein complex stability	1/263	16/18805	0.0625	4.46886882129278	1.6531822821854	0.201835343309464	0.471330585545487	0.412268394928055	PCM1	1
GO:0070593	dendrite self-avoidance	1/263	16/18805	0.0625	4.46886882129278	1.6531822821854	0.201835343309464	0.471330585545487	0.412268394928055	PALLD	1
GO:0085020	protein K6-linked ubiquitination	1/263	16/18805	0.0625	4.46886882129278	1.6531822821854	0.201835343309464	0.471330585545487	0.412268394928055	WDR24	1
GO:0090336	positive regulation of brown fat cell differentiation	1/263	16/18805	0.0625	4.46886882129278	1.6531822821854	0.201835343309464	0.471330585545487	0.412268394928055	PIM1	1
GO:0150118	negative regulation of cell-substrate junction organization	1/263	16/18805	0.0625	4.46886882129278	1.6531822821854	0.201835343309464	0.471330585545487	0.412268394928055	PHLDB2	1
GO:1901142	insulin metabolic process	1/263	16/18805	0.0625	4.46886882129278	1.6531822821854	0.201835343309464	0.471330585545487	0.412268394928055	SLC30A8	1
GO:1903798	regulation of miRNA processing	1/263	16/18805	0.0625	4.46886882129278	1.6531822821854	0.201835343309464	0.471330585545487	0.412268394928055	HOXB-AS3	1
GO:1903909	regulation of receptor clustering	1/263	16/18805	0.0625	4.46886882129278	1.6531822821854	0.201835343309464	0.471330585545487	0.412268394928055	FARP1	1
GO:0003279	cardiac septum development	3/263	111/18805	0.027027027027027	1.93248381461309	1.1734818577778	0.203254667141884	0.473973197616778	0.414579862654656	FRS2/ROBO2/FGFR2	3
GO:0035249	synaptic transmission, glutamatergic	3/263	111/18805	0.027027027027027	1.93248381461309	1.1734818577778	0.203254667141884	0.473973197616778	0.414579862654656	STXBP1/TNF/NR3C1	3
GO:0048278	vesicle docking	2/263	60/18805	0.0333333333333333	2.38339670468948	1.27821628630638	0.204818587016221	0.475600594939006	0.416003331664563	STXBP1/RIMS2	2
GO:0050881	musculoskeletal movement	2/263	60/18805	0.0333333333333333	2.38339670468948	1.27821628630638	0.204818587016221	0.475600594939006	0.416003331664563	TNNT1/TNF	2
GO:0055008	cardiac muscle tissue morphogenesis	2/263	60/18805	0.0333333333333333	2.38339670468948	1.27821628630638	0.204818587016221	0.475600594939006	0.416003331664563	MED1/FGFR2	2
GO:0060350	endochondral bone morphogenesis	2/263	60/18805	0.0333333333333333	2.38339670468948	1.27821628630638	0.204818587016221	0.475600594939006	0.416003331664563	BMPR1B/STC1	2
GO:0090497	mesenchymal cell migration	2/263	60/18805	0.0333333333333333	2.38339670468948	1.27821628630638	0.204818587016221	0.475600594939006	0.416003331664563	ERBB4/FN1	2
GO:0140374	antiviral innate immune response	2/263	60/18805	0.0333333333333333	2.38339670468948	1.27821628630638	0.204818587016221	0.475600594939006	0.416003331664563	MX1/TNF	2
GO:0051235	maintenance of location	5/263	224/18805	0.0223214285714286	1.59602457903313	1.06875545474408	0.205513009438332	0.476877018379791	0.41711980714763	PGR/CYBA/KDELR3/ITPR2/ANXA6	5
GO:0019216	regulation of lipid metabolic process	7/263	343/18805	0.0204081632653061	1.45922247225887	1.0222462501838	0.206017251258214	0.477710656506556	0.417848982514161	DNAJC15/ASAH1/SNAI1/GDF15/EPHX2/TNF/NR3C1	7
GO:0051147	regulation of muscle cell differentiation	4/263	167/18805	0.0239520958083832	1.71262038660322	1.10164465450587	0.206334111364446	0.478108928935197	0.41819734763184	FRS2/MESP1/RGS2/FGFR2	4
GO:0032963	collagen metabolic process	3/263	112/18805	0.0267857142857143	1.91522949483976	1.15697566135478	0.2068583308139	0.478650421370646	0.41867098593174	CTSB/CREB3L1/CTSK	3
GO:1901890	positive regulation of cell junction assembly	3/263	112/18805	0.0267857142857143	1.91522949483976	1.15697566135478	0.2068583308139	0.478650421370646	0.41867098593174	SLITRK6/EFNA5/CLSTN2	3
GO:0003012	muscle system process	9/263	467/18805	0.019271948608137	1.37798096416737	0.985092679504047	0.208659644712101	0.4790855652288	0.419051602139271	CYBA/TNNT1/JUP/CXCR4/SULF2/RGS2/ANXA6/STC1/TNF	9
GO:0032233	positive regulation of actin filament bundle assembly	2/263	61/18805	0.0327868852459016	2.34432462756342	1.25245647311769	0.209937334189177	0.4790855652288	0.419051602139271	EVL/LIMCH1	2
GO:0045604	regulation of epidermal cell differentiation	2/263	61/18805	0.0327868852459016	2.34432462756342	1.25245647311769	0.209937334189177	0.4790855652288	0.419051602139271	MED1/SFN	2
GO:0050953	sensory perception of light stimulus	5/263	226/18805	0.0221238938053097	1.58190046771426	1.04813317096926	0.21046667728264	0.4790855652288	0.419051602139271	SLITRK6/TIMP3/TACSTD2/COL18A1/REEP6	5
GO:0006672	ceramide metabolic process	3/263	113/18805	0.0265486725663717	1.89828056125711	1.14063854759819	0.210476481135713	0.4790855652288	0.419051602139271	ASAH1/DEGS2/SPTSSB	3
GO:0007605	sensory perception of sound	4/263	169/18805	0.0236686390532544	1.69235268972034	1.07676044252694	0.212150358968087	0.4790855652288	0.419051602139271	SLITRK6/HPN/FGFR1/GJC3	4
GO:0000463	maturation of LSU-rRNA from tricistronic rRNA transcript (SSU-rRNA, 5.8S rRNA, LSU-rRNA)	1/263	17/18805	0.0588235294117647	4.20599418474614	1.57496759403804	0.2130076944037	0.4790855652288	0.419051602139271	ZNHIT6	1
GO:0002679	respiratory burst involved in defense response	1/263	17/18805	0.0588235294117647	4.20599418474614	1.57496759403804	0.2130076944037	0.4790855652288	0.419051602139271	S100A9	1
GO:0006878	intracellular copper ion homeostasis	1/263	17/18805	0.0588235294117647	4.20599418474614	1.57496759403804	0.2130076944037	0.4790855652288	0.419051602139271	CP	1
GO:0007379	segment specification	1/263	17/18805	0.0588235294117647	4.20599418474614	1.57496759403804	0.2130076944037	0.4790855652288	0.419051602139271	MAFB	1
GO:0010042	response to manganese ion	1/263	17/18805	0.0588235294117647	4.20599418474614	1.57496759403804	0.2130076944037	0.4790855652288	0.419051602139271	ATP13A2	1
GO:0010470	regulation of gastrulation	1/263	17/18805	0.0588235294117647	4.20599418474614	1.57496759403804	0.2130076944037	0.4790855652288	0.419051602139271	PHLDB2	1
GO:0015816	glycine transport	1/263	17/18805	0.0588235294117647	4.20599418474614	1.57496759403804	0.2130076944037	0.4790855652288	0.419051602139271	RGS2	1
GO:0019373	epoxygenase P450 pathway	1/263	17/18805	0.0588235294117647	4.20599418474614	1.57496759403804	0.2130076944037	0.4790855652288	0.419051602139271	CYP2J2	1
GO:0030728	ovulation	1/263	17/18805	0.0588235294117647	4.20599418474614	1.57496759403804	0.2130076944037	0.4790855652288	0.419051602139271	PGR	1
GO:0031054	pre-miRNA processing	1/263	17/18805	0.0588235294117647	4.20599418474614	1.57496759403804	0.2130076944037	0.4790855652288	0.419051602139271	HOXB-AS3	1
GO:0032095	regulation of response to food	1/263	17/18805	0.0588235294117647	4.20599418474614	1.57496759403804	0.2130076944037	0.4790855652288	0.419051602139271	GDF15	1
GO:0033137	negative regulation of peptidyl-serine phosphorylation	1/263	17/18805	0.0588235294117647	4.20599418474614	1.57496759403804	0.2130076944037	0.4790855652288	0.419051602139271	GADD45A	1
GO:0034134	toll-like receptor 2 signaling pathway	1/263	17/18805	0.0588235294117647	4.20599418474614	1.57496759403804	0.2130076944037	0.4790855652288	0.419051602139271	CYBA	1
GO:0034310	primary alcohol catabolic process	1/263	17/18805	0.0588235294117647	4.20599418474614	1.57496759403804	0.2130076944037	0.4790855652288	0.419051602139271	ALDH3B2	1
GO:0042182	ketone catabolic process	1/263	17/18805	0.0588235294117647	4.20599418474614	1.57496759403804	0.2130076944037	0.4790855652288	0.419051602139271	KYNU	1
GO:0042448	progesterone metabolic process	1/263	17/18805	0.0588235294117647	4.20599418474614	1.57496759403804	0.2130076944037	0.4790855652288	0.419051602139271	STARD3	1
GO:0044771	meiotic cell cycle phase transition	1/263	17/18805	0.0588235294117647	4.20599418474614	1.57496759403804	0.2130076944037	0.4790855652288	0.419051602139271	OVOL1	1
GO:0044793	negative regulation by host of viral process	1/263	17/18805	0.0588235294117647	4.20599418474614	1.57496759403804	0.2130076944037	0.4790855652288	0.419051602139271	LTF	1
GO:0048557	embryonic digestive tract morphogenesis	1/263	17/18805	0.0588235294117647	4.20599418474614	1.57496759403804	0.2130076944037	0.4790855652288	0.419051602139271	FGFR2	1
GO:0050910	detection of mechanical stimulus involved in sensory perception of sound	1/263	17/18805	0.0588235294117647	4.20599418474614	1.57496759403804	0.2130076944037	0.4790855652288	0.419051602139271	HPN	1
GO:0051044	positive regulation of membrane protein ectodomain proteolysis	1/263	17/18805	0.0588235294117647	4.20599418474614	1.57496759403804	0.2130076944037	0.4790855652288	0.419051602139271	TNF	1
GO:0051782	negative regulation of cell division	1/263	17/18805	0.0588235294117647	4.20599418474614	1.57496759403804	0.2130076944037	0.4790855652288	0.419051602139271	TEX14	1
GO:0055091	phospholipid homeostasis	1/263	17/18805	0.0588235294117647	4.20599418474614	1.57496759403804	0.2130076944037	0.4790855652288	0.419051602139271	TLCD1	1
GO:0070254	mucus secretion	1/263	17/18805	0.0588235294117647	4.20599418474614	1.57496759403804	0.2130076944037	0.4790855652288	0.419051602139271	CYBA	1
GO:0070920	regulation of regulatory ncRNA processing	1/263	17/18805	0.0588235294117647	4.20599418474614	1.57496759403804	0.2130076944037	0.4790855652288	0.419051602139271	HOXB-AS3	1
GO:0080154	regulation of fertilization	1/263	17/18805	0.0588235294117647	4.20599418474614	1.57496759403804	0.2130076944037	0.4790855652288	0.419051602139271	PLAT	1
GO:0090136	epithelial cell-cell adhesion	1/263	17/18805	0.0588235294117647	4.20599418474614	1.57496759403804	0.2130076944037	0.4790855652288	0.419051602139271	JUP	1
GO:0099151	regulation of postsynaptic density assembly	1/263	17/18805	0.0588235294117647	4.20599418474614	1.57496759403804	0.2130076944037	0.4790855652288	0.419051602139271	FGFR1	1
GO:0170043	non-proteinogenic amino acid biosynthetic process	1/263	17/18805	0.0588235294117647	4.20599418474614	1.57496759403804	0.2130076944037	0.4790855652288	0.419051602139271	PLOD2	1
GO:1901550	regulation of endothelial cell development	1/263	17/18805	0.0588235294117647	4.20599418474614	1.57496759403804	0.2130076944037	0.4790855652288	0.419051602139271	TNF	1
GO:1902033	regulation of hematopoietic stem cell proliferation	1/263	17/18805	0.0588235294117647	4.20599418474614	1.57496759403804	0.2130076944037	0.4790855652288	0.419051602139271	PIM1	1
GO:1902969	mitotic DNA replication	1/263	17/18805	0.0588235294117647	4.20599418474614	1.57496759403804	0.2130076944037	0.4790855652288	0.419051602139271	FGFR1	1
GO:1903140	regulation of establishment of endothelial barrier	1/263	17/18805	0.0588235294117647	4.20599418474614	1.57496759403804	0.2130076944037	0.4790855652288	0.419051602139271	TNF	1
GO:1903541	regulation of exosomal secretion	1/263	17/18805	0.0588235294117647	4.20599418474614	1.57496759403804	0.2130076944037	0.4790855652288	0.419051602139271	ATP13A2	1
GO:2001212	regulation of vasculogenesis	1/263	17/18805	0.0588235294117647	4.20599418474614	1.57496759403804	0.2130076944037	0.4790855652288	0.419051602139271	RAMP2	1
GO:0010038	response to metal ion	7/263	347/18805	0.0201729106628242	1.44240146393312	0.990635025518822	0.213958742948831	0.479791553645448	0.419669123514491	CYBRD1/MT1E/ATP13A2/SLC39A8/SLC30A8/IMPA2/MT1G	7
GO:0002712	regulation of B cell mediated immunity	2/263	62/18805	0.032258064516129	2.30651294002208	1.22719821449959	0.215068930116639	0.479791553645448	0.419669123514491	HPX/TNF	2
GO:0002823	negative regulation of adaptive immune response based on somatic recombination of immune receptors built from immunoglobulin superfamily domains	2/263	62/18805	0.032258064516129	2.30651294002208	1.22719821449959	0.215068930116639	0.479791553645448	0.419669123514491	LGALS1/ASCL2	2
GO:0002889	regulation of immunoglobulin mediated immune response	2/263	62/18805	0.032258064516129	2.30651294002208	1.22719821449959	0.215068930116639	0.479791553645448	0.419669123514491	HPX/TNF	2
GO:0003179	heart valve morphogenesis	2/263	62/18805	0.032258064516129	2.30651294002208	1.22719821449959	0.215068930116639	0.479791553645448	0.419669123514491	SNAI1/ROBO2	2
GO:0007566	embryo implantation	2/263	62/18805	0.032258064516129	2.30651294002208	1.22719821449959	0.215068930116639	0.479791553645448	0.419669123514491	STC1/STC2	2
GO:0010574	regulation of vascular endothelial growth factor production	2/263	62/18805	0.032258064516129	2.30651294002208	1.22719821449959	0.215068930116639	0.479791553645448	0.419669123514491	SULF2/NDRG2	2
GO:0022029	telencephalon cell migration	2/263	62/18805	0.032258064516129	2.30651294002208	1.22719821449959	0.215068930116639	0.479791553645448	0.419669123514491	CXCR4/SOCS7	2
GO:0031663	lipopolysaccharide-mediated signaling pathway	2/263	62/18805	0.032258064516129	2.30651294002208	1.22719821449959	0.215068930116639	0.479791553645448	0.419669123514491	LTF/SASH1	2
GO:0038066	p38MAPK cascade	2/263	62/18805	0.032258064516129	2.30651294002208	1.22719821449959	0.215068930116639	0.479791553645448	0.419669123514491	GADD45A/SASH1	2
GO:0050879	multicellular organismal movement	2/263	62/18805	0.032258064516129	2.30651294002208	1.22719821449959	0.215068930116639	0.479791553645448	0.419669123514491	TNNT1/TNF	2
GO:1900024	regulation of substrate adhesion-dependent cell spreading	2/263	62/18805	0.032258064516129	2.30651294002208	1.22719821449959	0.215068930116639	0.479791553645448	0.419669123514491	EFNA5/TACSTD2	2
GO:0045055	regulated exocytosis	5/263	228/18805	0.0219298245614035	1.56802414782203	1.02771131690619	0.21545887271905	0.48033625548665	0.420145569051178	RAB11FIP1/FBXL20/STXBP1/STEAP2/RIMS2	5
GO:0014812	muscle cell migration	3/263	115/18805	0.0260869565217391	1.86526698627872	1.10845766380501	0.217754129888218	0.485124988493359	0.424334228414605	PLAT/NET1/ANXA1	3
GO:0072330	monocarboxylic acid biosynthetic process	5/263	229/18805	0.0218340611353712	1.56117688080097	1.01757427201144	0.217969010524631	0.48527560113423	0.424465967863756	GSTP1/HACD4/FADS1/FADS2/FASN	5
GO:0003229	ventricular cardiac muscle tissue development	2/263	63/18805	0.0317460317460317	2.26990162351379	1.20242249788966	0.220212020623648	0.486591886251468	0.425617309977324	MED1/FGFR2	2
GO:0051341	regulation of oxidoreductase activity	2/263	63/18805	0.0317460317460317	2.26990162351379	1.20242249788966	0.220212020623648	0.486591886251468	0.425617309977324	S100A1/TNF	2
GO:0170041	non-proteinogenic amino acid metabolic process	2/263	63/18805	0.0317460317460317	2.26990162351379	1.20242249788966	0.220212020623648	0.486591886251468	0.425617309977324	PLOD2/KYNU	2
GO:0000422	autophagy of mitochondrion	3/263	116/18805	0.0258620689655172	1.84918709846598	1.09260719760632	0.221412582057708	0.486591886251468	0.425617309977324	ATP13A2/CTSK/SNX30	3
GO:0050731	positive regulation of peptidyl-tyrosine phosphorylation	3/263	116/18805	0.0258620689655172	1.84918709846598	1.09260719760632	0.221412582057708	0.486591886251468	0.425617309977324	GFRA1/ERBB4/EFNA5	3
GO:0070252	actin-mediated cell contraction	3/263	116/18805	0.0258620689655172	1.84918709846598	1.09260719760632	0.221412582057708	0.486591886251468	0.425617309977324	JUP/LIMCH1/STC1	3
GO:0090263	positive regulation of canonical Wnt signaling pathway	3/263	116/18805	0.0258620689655172	1.84918709846598	1.09260719760632	0.221412582057708	0.486591886251468	0.425617309977324	JUP/SULF2/FGFR2	3
GO:0030900	forebrain development	8/263	413/18805	0.0193704600484262	1.38502471943214	0.942266751217907	0.222829505859014	0.486591886251468	0.425617309977324	PCM1/FRS2/FGFR1/CXCR4/ERBB4/ROBO2/FGFR2/SOCS7	8
GO:0007009	plasma membrane organization	4/263	173/18805	0.023121387283237	1.65322314776149	1.0279679798169	0.223917888109851	0.486591886251468	0.425617309977324	TLCD1/MAFB/CXCR4/DMKN	4
GO:0001956	positive regulation of neurotransmitter secretion	1/263	18/18805	0.0555555555555556	3.97232784114913	1.50255006440296	0.224024246265092	0.486591886251468	0.425617309977324	STXBP1	1
GO:0002827	positive regulation of T-helper 1 type immune response	1/263	18/18805	0.0555555555555556	3.97232784114913	1.50255006440296	0.224024246265092	0.486591886251468	0.425617309977324	IL1R1	1
GO:0003159	morphogenesis of an endothelium	1/263	18/18805	0.0555555555555556	3.97232784114913	1.50255006440296	0.224024246265092	0.486591886251468	0.425617309977324	CXCR4	1
GO:0009208	pyrimidine ribonucleoside triphosphate metabolic process	1/263	18/18805	0.0555555555555556	3.97232784114913	1.50255006440296	0.224024246265092	0.486591886251468	0.425617309977324	ENTPD4	1
GO:0014048	regulation of glutamate secretion	1/263	18/18805	0.0555555555555556	3.97232784114913	1.50255006440296	0.224024246265092	0.486591886251468	0.425617309977324	STXBP1	1
GO:0015936	coenzyme A metabolic process	1/263	18/18805	0.0555555555555556	3.97232784114913	1.50255006440296	0.224024246265092	0.486591886251468	0.425617309977324	NUDT8	1
GO:0021511	spinal cord patterning	1/263	18/18805	0.0555555555555556	3.97232784114913	1.50255006440296	0.224024246265092	0.486591886251468	0.425617309977324	CHRD	1
GO:0030730	triglyceride storage	1/263	18/18805	0.0555555555555556	3.97232784114913	1.50255006440296	0.224024246265092	0.486591886251468	0.425617309977324	TNF	1
GO:0031649	heat generation	1/263	18/18805	0.0555555555555556	3.97232784114913	1.50255006440296	0.224024246265092	0.486591886251468	0.425617309977324	TNF	1
GO:0034727	piecemeal microautophagy of the nucleus	1/263	18/18805	0.0555555555555556	3.97232784114913	1.50255006440296	0.224024246265092	0.486591886251468	0.425617309977324	SNX30	1
GO:0035728	response to hepatocyte growth factor	1/263	18/18805	0.0555555555555556	3.97232784114913	1.50255006440296	0.224024246265092	0.486591886251468	0.425617309977324	MED1	1
GO:0035973	aggrephagy	1/263	18/18805	0.0555555555555556	3.97232784114913	1.50255006440296	0.224024246265092	0.486591886251468	0.425617309977324	HSPB8	1
GO:0043217	myelin maintenance	1/263	18/18805	0.0555555555555556	3.97232784114913	1.50255006440296	0.224024246265092	0.486591886251468	0.425617309977324	CXCR4	1
GO:0043923	positive regulation by host of viral transcription	1/263	18/18805	0.0555555555555556	3.97232784114913	1.50255006440296	0.224024246265092	0.486591886251468	0.425617309977324	HPN	1
GO:0051917	regulation of fibrinolysis	1/263	18/18805	0.0555555555555556	3.97232784114913	1.50255006440296	0.224024246265092	0.486591886251468	0.425617309977324	PLAT	1
GO:0055119	relaxation of cardiac muscle	1/263	18/18805	0.0555555555555556	3.97232784114913	1.50255006440296	0.224024246265092	0.486591886251468	0.425617309977324	RGS2	1
GO:0061154	endothelial tube morphogenesis	1/263	18/18805	0.0555555555555556	3.97232784114913	1.50255006440296	0.224024246265092	0.486591886251468	0.425617309977324	CXCR4	1
GO:0061323	cell proliferation involved in heart morphogenesis	1/263	18/18805	0.0555555555555556	3.97232784114913	1.50255006440296	0.224024246265092	0.486591886251468	0.425617309977324	PIM1	1
GO:0071371	cellular response to gonadotropin stimulus	1/263	18/18805	0.0555555555555556	3.97232784114913	1.50255006440296	0.224024246265092	0.486591886251468	0.425617309977324	EFNA5	1
GO:0097396	response to interleukin-17	1/263	18/18805	0.0555555555555556	3.97232784114913	1.50255006440296	0.224024246265092	0.486591886251468	0.425617309977324	SOCS3	1
GO:0097398	cellular response to interleukin-17	1/263	18/18805	0.0555555555555556	3.97232784114913	1.50255006440296	0.224024246265092	0.486591886251468	0.425617309977324	SOCS3	1
GO:0098712	L-glutamate import across plasma membrane	1/263	18/18805	0.0555555555555556	3.97232784114913	1.50255006440296	0.224024246265092	0.486591886251468	0.425617309977324	TNF	1
GO:0098974	postsynaptic actin cytoskeleton organization	1/263	18/18805	0.0555555555555556	3.97232784114913	1.50255006440296	0.224024246265092	0.486591886251468	0.425617309977324	FARP1	1
GO:0150078	positive regulation of neuroinflammatory response	1/263	18/18805	0.0555555555555556	3.97232784114913	1.50255006440296	0.224024246265092	0.486591886251468	0.425617309977324	TNF	1
GO:1901569	fatty acid derivative catabolic process	1/263	18/18805	0.0555555555555556	3.97232784114913	1.50255006440296	0.224024246265092	0.486591886251468	0.425617309977324	NUDT8	1
GO:1902065	response to L-glutamate	1/263	18/18805	0.0555555555555556	3.97232784114913	1.50255006440296	0.224024246265092	0.486591886251468	0.425617309977324	TNF	1
GO:1905048	regulation of metallopeptidase activity	1/263	18/18805	0.0555555555555556	3.97232784114913	1.50255006440296	0.224024246265092	0.486591886251468	0.425617309977324	TIMP3	1
GO:2000136	regulation of cell proliferation involved in heart morphogenesis	1/263	18/18805	0.0555555555555556	3.97232784114913	1.50255006440296	0.224024246265092	0.486591886251468	0.425617309977324	PIM1	1
GO:0006766	vitamin metabolic process	3/263	117/18805	0.0256410256410256	1.83338208053037	1.07691241397304	0.225083428565437	0.487896596208425	0.426758527407928	SNAI1/FGFR1/TNF	3
GO:0010821	regulation of mitochondrion organization	3/263	117/18805	0.0256410256410256	1.83338208053037	1.07691241397304	0.225083428565437	0.487896596208425	0.426758527407928	ATP13A2/INF2/TNFSF10	3
GO:0002763	positive regulation of myeloid leukocyte differentiation	2/263	64/18805	0.03125	2.23443441064639	1.17811133160879	0.225365286624954	0.487896596208425	0.426758527407928	KLF10/TNF	2
GO:0046824	positive regulation of nucleocytoplasmic transport	2/263	64/18805	0.03125	2.23443441064639	1.17811133160879	0.225365286624954	0.487896596208425	0.426758527407928	JUP/SFN	2
GO:0098900	regulation of action potential	2/263	64/18805	0.03125	2.23443441064639	1.17811133160879	0.225365286624954	0.487896596208425	0.426758527407928	JUP/TNF	2
GO:0071222	cellular response to lipopolysaccharide	5/263	232/18805	0.021551724137931	1.54098924872165	0.987452706516279	0.225553618650326	0.487983698918465	0.426834715322661	GSTP1/LTF/SASH1/TNF/CXCL8	5
GO:0016055	Wnt signaling pathway	9/263	477/18805	0.0188679245283019	1.34909247435254	0.91974374946073	0.225837821214275	0.488277966470495	0.427092108360743	KLF4/SNAI1/JUP/MESP1/CELSR2/SULF2/FZD6/FGFR2/NDRG2	9
GO:0048660	regulation of smooth muscle cell proliferation	4/263	174/18805	0.0229885057471264	1.64372186530309	1.0159667841252	0.226886332408489	0.490223255925226	0.428793634605309	FRS2/FGFR2/TNF/NDRG2	4
GO:0048705	skeletal system morphogenesis	5/263	233/18805	0.0214592274678112	1.53437556095889	0.977507094592656	0.228099338562814	0.492521179924293	0.430803606942805	BMPR1B/LTF/FGFR1/FGFR2/STC1	5
GO:0006368	transcription elongation by RNA polymerase II	3/263	118/18805	0.0254237288135593	1.81784494425469	1.06137020361871	0.228766156405204	0.492991815143982	0.43121526710781	MED1/CDK12/EPOP	3
GO:0033209	tumor necrosis factor-mediated signaling pathway	3/263	118/18805	0.0254237288135593	1.81784494425469	1.06137020361871	0.228766156405204	0.492991815143982	0.43121526710781	GSTP1/PYDC1/TNF	3
GO:0035967	cellular response to topologically incorrect protein	3/263	118/18805	0.0254237288135593	1.81784494425469	1.06137020361871	0.228766156405204	0.492991815143982	0.43121526710781	HSPB8/CREB3L1/STC2	3
GO:0051048	negative regulation of secretion	4/263	175/18805	0.0228571428571429	1.63432916892993	1.00404224578332	0.229864864699948	0.494793895173132	0.432791529425457	RAB11FIP1/ANXA1/SERGEF/TNF	4
GO:0021545	cranial nerve development	2/263	65/18805	0.0307692307692308	2.20005849663644	1.15424767479684	0.230527443414765	0.494793895173132	0.432791529425457	SLITRK6/MAFB	2
GO:0021885	forebrain cell migration	2/263	65/18805	0.0307692307692308	2.20005849663644	1.15424767479684	0.230527443414765	0.494793895173132	0.432791529425457	CXCR4/SOCS7	2
GO:0022617	extracellular matrix disassembly	2/263	65/18805	0.0307692307692308	2.20005849663644	1.15424767479684	0.230527443414765	0.494793895173132	0.432791529425457	HPN/CTSK	2
GO:0045428	regulation of nitric oxide biosynthetic process	2/263	65/18805	0.0307692307692308	2.20005849663644	1.15424767479684	0.230527443414765	0.494793895173132	0.432791529425457	KLF4/TNF	2
GO:0050769	positive regulation of neurogenesis	5/263	234/18805	0.0213675213675214	1.52781840044197	0.967608148593381	0.230653542636094	0.494793895173132	0.432791529425457	CXCR4/ROBO2/FN1/EFNA5/TNF	5
GO:0050821	protein stabilization	5/263	234/18805	0.0213675213675214	1.52781840044197	0.967608148593381	0.230653542636094	0.494793895173132	0.432791529425457	BAG1/STXBP1/PIM1/HOXB-AS3/RPL23	5
GO:0043603	amide metabolic process	9/263	480/18805	0.01875	1.34066064638783	0.900420347024666	0.231094071491596	0.495416373171639	0.433336005029613	GSTP1/ASAH1/DEGS2/SPTSSB/SLC30A8/NUDT8/BACE2/TNF/FASN	9
GO:0043604	amide biosynthetic process	4/263	176/18805	0.0227272727272727	1.62504320774283	0.992193345158415	0.232853217421591	0.497834875448122	0.435451446043274	ASAH1/DEGS2/SPTSSB/FASN	4
GO:0050905	neuromuscular process	4/263	176/18805	0.0227272727272727	1.62504320774283	0.992193345158415	0.232853217421591	0.497834875448122	0.435451446043274	TNNT1/SLITRK6/SPART/TNF	4
GO:2000045	regulation of G1/S transition of mitotic cell cycle	4/263	176/18805	0.0227272727272727	1.62504320774283	0.992193345158415	0.232853217421591	0.497834875448122	0.435451446043274	KLF4/ANXA1/CDC6/CDKN2B	4
GO:0032496	response to lipopolysaccharide	7/263	357/18805	0.0196078431372549	1.40199806158205	0.913288794505531	0.234287777449759	0.497834875448122	0.435451446043274	GSTP1/LTF/SASH1/FGFR2/TNF/S100A7/CXCL8	7
GO:0045088	regulation of innate immune response	9/263	482/18805	0.0186721991701245	1.33509773914141	0.887608460472279	0.234623388971866	0.497834875448122	0.435451446043274	MED1/CYBA/LTF/SFN/CADM1/PIM1/HPX/TNF/S100A9	9
GO:0002281	macrophage activation involved in immune response	1/263	19/18805	0.0526315789473684	3.76325795477286	1.43517803018401	0.23488716334777	0.497834875448122	0.435451446043274	TNF	1
GO:0003417	growth plate cartilage development	1/263	19/18805	0.0526315789473684	3.76325795477286	1.43517803018401	0.23488716334777	0.497834875448122	0.435451446043274	STC1	1
GO:0007620	copulation	1/263	19/18805	0.0526315789473684	3.76325795477286	1.43517803018401	0.23488716334777	0.497834875448122	0.435451446043274	KLK14	1
GO:0035743	CD4-positive, alpha-beta T cell cytokine production	1/263	19/18805	0.0526315789473684	3.76325795477286	1.43517803018401	0.23488716334777	0.497834875448122	0.435451446043274	IL1R1	1
GO:0036035	osteoclast development	1/263	19/18805	0.0526315789473684	3.76325795477286	1.43517803018401	0.23488716334777	0.497834875448122	0.435451446043274	LTF	1
GO:0048339	paraxial mesoderm development	1/263	19/18805	0.0526315789473684	3.76325795477286	1.43517803018401	0.23488716334777	0.497834875448122	0.435451446043274	FGFR1	1
GO:0060263	regulation of respiratory burst	1/263	19/18805	0.0526315789473684	3.76325795477286	1.43517803018401	0.23488716334777	0.497834875448122	0.435451446043274	S100A9	1
GO:0060965	negative regulation of miRNA-mediated gene silencing	1/263	19/18805	0.0526315789473684	3.76325795477286	1.43517803018401	0.23488716334777	0.497834875448122	0.435451446043274	HOXB-AS3	1
GO:0098751	bone cell development	1/263	19/18805	0.0526315789473684	3.76325795477286	1.43517803018401	0.23488716334777	0.497834875448122	0.435451446043274	LTF	1
GO:0140131	positive regulation of lymphocyte chemotaxis	1/263	19/18805	0.0526315789473684	3.76325795477286	1.43517803018401	0.23488716334777	0.497834875448122	0.435451446043274	S100A7	1
GO:0170044	non-proteinogenic amino acid catabolic process	1/263	19/18805	0.0526315789473684	3.76325795477286	1.43517803018401	0.23488716334777	0.497834875448122	0.435451446043274	KYNU	1
GO:1904666	regulation of ubiquitin protein ligase activity	1/263	19/18805	0.0526315789473684	3.76325795477286	1.43517803018401	0.23488716334777	0.497834875448122	0.435451446043274	RPL23	1
GO:0001655	urogenital system development	2/263	66/18805	0.0303030303030303	2.16672427699044	1.13081537316214	0.235697239969369	0.497834875448122	0.435451446043274	FRS2/FGFR2	2
GO:0017156	calcium-ion regulated exocytosis	2/263	66/18805	0.0303030303030303	2.16672427699044	1.13081537316214	0.235697239969369	0.497834875448122	0.435451446043274	STXBP1/RIMS2	2
GO:0033135	regulation of peptidyl-serine phosphorylation	2/263	66/18805	0.0303030303030303	2.16672427699044	1.13081537316214	0.235697239969369	0.497834875448122	0.435451446043274	GADD45A/TNF	2
GO:0052548	regulation of endopeptidase activity	2/263	66/18805	0.0303030303030303	2.16672427699044	1.13081537316214	0.235697239969369	0.497834875448122	0.435451446043274	ATP13A2/TIMP3	2
GO:1901224	positive regulation of non-canonical NF-kappaB signal transduction	2/263	66/18805	0.0303030303030303	2.16672427699044	1.13081537316214	0.235697239969369	0.497834875448122	0.435451446043274	SASH1/TNF	2
GO:2000351	regulation of endothelial cell apoptotic process	2/263	66/18805	0.0303030303030303	2.16672427699044	1.13081537316214	0.235697239969369	0.497834875448122	0.435451446043274	RAMP2/TNF	2
GO:0006887	exocytosis	7/263	358/18805	0.0195530726256983	1.3980818658793	0.905682009247617	0.236355818084344	0.498804817950199	0.436299845554715	RAB11FIP1/FBXL20/ATP13A2/STXBP1/ANXA1/STEAP2/RIMS2	7
GO:0010506	regulation of autophagy	7/263	359/18805	0.0194986072423398	1.39418748742282	0.898097864557925	0.238429920785785	0.498804817950199	0.436299845554715	HSPB8/CISD1/ATP13A2/SESN3/DEPP1/WDR24/SNX30	7
GO:0007338	single fertilization	4/263	178/18805	0.0224719101123595	1.60678429529628	0.968718475927798	0.238858316837845	0.498804817950199	0.436299845554715	PLAT/STXBP1/LY6K/TRIM36	4
GO:0048659	smooth muscle cell proliferation	4/263	178/18805	0.0224719101123595	1.60678429529628	0.968718475927798	0.238858316837845	0.498804817950199	0.436299845554715	FRS2/FGFR2/TNF/NDRG2	4
GO:0006275	regulation of DNA replication	3/263	121/18805	0.0247933884297521	1.77277440844672	1.01562923672174	0.239880561701692	0.498804817950199	0.436299845554715	MEAF6/FGFR1/CDC6	3
GO:0006661	phosphatidylinositol biosynthetic process	3/263	121/18805	0.0247933884297521	1.77277440844672	1.01562923672174	0.239880561701692	0.498804817950199	0.436299845554715	PGAP3/PIK3C2G/IMPA2	3
GO:0031346	positive regulation of cell projection organization	7/263	360/18805	0.0194444444444444	1.3903147444022	0.890536214370908	0.24051000297377	0.498804817950199	0.436299845554715	MIEN1/FGFR1/RGS2/ROBO2/FN1/EFNA5/S100A9	7
GO:0002820	negative regulation of adaptive immune response	2/263	67/18805	0.0298507462686567	2.13438510867715	1.10779909998199	0.240873458262418	0.498804817950199	0.436299845554715	LGALS1/ASCL2	2
GO:0030219	megakaryocyte differentiation	2/263	67/18805	0.0298507462686567	2.13438510867715	1.10779909998199	0.240873458262418	0.498804817950199	0.436299845554715	MED1/CDKN2B	2
GO:0034394	protein localization to cell surface	2/263	67/18805	0.0298507462686567	2.13438510867715	1.10779909998199	0.240873458262418	0.498804817950199	0.436299845554715	ERBB4/TNF	2
GO:0035904	aorta development	2/263	67/18805	0.0298507462686567	2.13438510867715	1.10779909998199	0.240873458262418	0.498804817950199	0.436299845554715	FKBP10/ROBO2	2
GO:0045185	maintenance of protein location	2/263	67/18805	0.0298507462686567	2.13438510867715	1.10779909998199	0.240873458262418	0.498804817950199	0.436299845554715	PGR/KDELR3	2
GO:0050832	defense response to fungus	2/263	67/18805	0.0298507462686567	2.13438510867715	1.10779909998199	0.240873458262418	0.498804817950199	0.436299845554715	LTF/S100A9	2
GO:0071300	cellular response to retinoic acid	2/263	67/18805	0.0298507462686567	2.13438510867715	1.10779909998199	0.240873458262418	0.498804817950199	0.436299845554715	FGFR2/TNF	2
GO:0080164	regulation of nitric oxide metabolic process	2/263	67/18805	0.0298507462686567	2.13438510867715	1.10779909998199	0.240873458262418	0.498804817950199	0.436299845554715	KLF4/TNF	2
GO:0014706	striated muscle tissue development	8/263	423/18805	0.0189125295508274	1.35228181826353	0.872747752668212	0.241770148286009	0.498804817950199	0.436299845554715	MED1/FRS2/MESP1/FGFR1/PIM1/ERBB4/RGS2/FGFR2	8
GO:0031589	cell-substrate adhesion	7/263	361/18805	0.0193905817174515	1.38646345702158	0.882996913988957	0.242595981806889	0.498804817950199	0.436299845554715	JUP/FBLN2/LIMCH1/FN1/EFNA5/TACSTD2/PHLDB2	7
GO:0045582	positive regulation of T cell differentiation	3/263	122/18805	0.0245901639344262	1.75824347067257	1.0006679607017	0.243605770530215	0.498804817950199	0.436299845554715	SOCS1/ANXA1/RHOH	3
GO:1990778	protein localization to cell periphery	7/263	362/18805	0.0193370165745856	1.3826334474718	0.875479820065728	0.244687774193902	0.498804817950199	0.436299845554715	ERBB2/JUP/SFN/STXBP1/ERBB4/RAMP2/TNF	7
GO:0001936	regulation of endothelial cell proliferation	4/263	180/18805	0.0222222222222222	1.58893113645965	0.945534402254529	0.244899502667848	0.498804817950199	0.436299845554715	EGFL7/ECM1/FGFR1/TNF	4
GO:0000076	DNA replication checkpoint signaling	1/263	20/18805	0.05	3.57509505703422	1.37223145579949	0.245598580149619	0.498804817950199	0.436299845554715	CDC6	1
GO:0001502	cartilage condensation	1/263	20/18805	0.05	3.57509505703422	1.37223145579949	0.245598580149619	0.498804817950199	0.436299845554715	BMPR1B	1
GO:0003184	pulmonary valve morphogenesis	1/263	20/18805	0.05	3.57509505703422	1.37223145579949	0.245598580149619	0.498804817950199	0.436299845554715	ROBO2	1
GO:0007351	tripartite regional subdivision	1/263	20/18805	0.05	3.57509505703422	1.37223145579949	0.245598580149619	0.498804817950199	0.436299845554715	FRS2	1
GO:0008595	anterior/posterior axis specification, embryo	1/263	20/18805	0.05	3.57509505703422	1.37223145579949	0.245598580149619	0.498804817950199	0.436299845554715	FRS2	1
GO:0010587	miRNA catabolic process	1/263	20/18805	0.05	3.57509505703422	1.37223145579949	0.245598580149619	0.498804817950199	0.436299845554715	XIST	1
GO:0030150	protein import into mitochondrial matrix	1/263	20/18805	0.05	3.57509505703422	1.37223145579949	0.245598580149619	0.498804817950199	0.436299845554715	DNAJC15	1
GO:0031954	positive regulation of protein autophosphorylation	1/263	20/18805	0.05	3.57509505703422	1.37223145579949	0.245598580149619	0.498804817950199	0.436299845554715	NEK10	1
GO:0032332	positive regulation of chondrocyte differentiation	1/263	20/18805	0.05	3.57509505703422	1.37223145579949	0.245598580149619	0.498804817950199	0.436299845554715	BMPR1B	1
GO:0034393	positive regulation of smooth muscle cell apoptotic process	1/263	20/18805	0.05	3.57509505703422	1.37223145579949	0.245598580149619	0.498804817950199	0.436299845554715	BAG1	1
GO:0038203	TORC2 signaling	1/263	20/18805	0.05	3.57509505703422	1.37223145579949	0.245598580149619	0.498804817950199	0.436299845554715	SESN3	1
GO:0042985	negative regulation of amyloid precursor protein biosynthetic process	1/263	20/18805	0.05	3.57509505703422	1.37223145579949	0.245598580149619	0.498804817950199	0.436299845554715	BACE2	1
GO:0043116	negative regulation of vascular permeability	1/263	20/18805	0.05	3.57509505703422	1.37223145579949	0.245598580149619	0.498804817950199	0.436299845554715	RAMP2	1
GO:0045618	positive regulation of keratinocyte differentiation	1/263	20/18805	0.05	3.57509505703422	1.37223145579949	0.245598580149619	0.498804817950199	0.436299845554715	MED1	1
GO:0046827	positive regulation of protein export from nucleus	1/263	20/18805	0.05	3.57509505703422	1.37223145579949	0.245598580149619	0.498804817950199	0.436299845554715	SFN	1
GO:0051447	negative regulation of meiotic cell cycle	1/263	20/18805	0.05	3.57509505703422	1.37223145579949	0.245598580149619	0.498804817950199	0.436299845554715	OVOL1	1
GO:0051797	regulation of hair follicle development	1/263	20/18805	0.05	3.57509505703422	1.37223145579949	0.245598580149619	0.498804817950199	0.436299845554715	TNF	1
GO:0060149	negative regulation of post-transcriptional gene silencing	1/263	20/18805	0.05	3.57509505703422	1.37223145579949	0.245598580149619	0.498804817950199	0.436299845554715	HOXB-AS3	1
GO:0060353	regulation of cell adhesion molecule production	1/263	20/18805	0.05	3.57509505703422	1.37223145579949	0.245598580149619	0.498804817950199	0.436299845554715	CXCL8	1
GO:0060749	mammary gland alveolus development	1/263	20/18805	0.05	3.57509505703422	1.37223145579949	0.245598580149619	0.498804817950199	0.436299845554715	ERBB4	1
GO:0060967	negative regulation of gene silencing by regulatory ncRNA	1/263	20/18805	0.05	3.57509505703422	1.37223145579949	0.245598580149619	0.498804817950199	0.436299845554715	HOXB-AS3	1
GO:0061377	mammary gland lobule development	1/263	20/18805	0.05	3.57509505703422	1.37223145579949	0.245598580149619	0.498804817950199	0.436299845554715	ERBB4	1
GO:0070314	G1 to G0 transition	1/263	20/18805	0.05	3.57509505703422	1.37223145579949	0.245598580149619	0.498804817950199	0.436299845554715	RPL23	1
GO:0070886	positive regulation of calcineurin-NFAT signaling cascade	1/263	20/18805	0.05	3.57509505703422	1.37223145579949	0.245598580149619	0.498804817950199	0.436299845554715	TNF	1
GO:0071474	cellular hyperosmotic response	1/263	20/18805	0.05	3.57509505703422	1.37223145579949	0.245598580149619	0.498804817950199	0.436299845554715	EFHD1	1
GO:0071605	monocyte chemotactic protein-1 production	1/263	20/18805	0.05	3.57509505703422	1.37223145579949	0.245598580149619	0.498804817950199	0.436299845554715	GSTP1	1
GO:0071637	regulation of monocyte chemotactic protein-1 production	1/263	20/18805	0.05	3.57509505703422	1.37223145579949	0.245598580149619	0.498804817950199	0.436299845554715	GSTP1	1
GO:0072376	protein activation cascade	1/263	20/18805	0.05	3.57509505703422	1.37223145579949	0.245598580149619	0.498804817950199	0.436299845554715	PRCP	1
GO:0106058	positive regulation of calcineurin-mediated signaling	1/263	20/18805	0.05	3.57509505703422	1.37223145579949	0.245598580149619	0.498804817950199	0.436299845554715	TNF	1
GO:1900221	regulation of amyloid-beta clearance	1/263	20/18805	0.05	3.57509505703422	1.37223145579949	0.245598580149619	0.498804817950199	0.436299845554715	TNF	1
GO:1900369	negative regulation of post-transcriptional gene silencing by regulatory ncRNA	1/263	20/18805	0.05	3.57509505703422	1.37223145579949	0.245598580149619	0.498804817950199	0.436299845554715	HOXB-AS3	1
GO:1900424	regulation of defense response to bacterium	1/263	20/18805	0.05	3.57509505703422	1.37223145579949	0.245598580149619	0.498804817950199	0.436299845554715	CYBA	1
GO:1901739	regulation of myoblast fusion	1/263	20/18805	0.05	3.57509505703422	1.37223145579949	0.245598580149619	0.498804817950199	0.436299845554715	GDF15	1
GO:1902236	negative regulation of endoplasmic reticulum stress-induced intrinsic apoptotic signaling pathway	1/263	20/18805	0.05	3.57509505703422	1.37223145579949	0.245598580149619	0.498804817950199	0.436299845554715	CREB3L1	1
GO:1903428	positive regulation of reactive oxygen species biosynthetic process	1/263	20/18805	0.05	3.57509505703422	1.37223145579949	0.245598580149619	0.498804817950199	0.436299845554715	CYBA	1
GO:1903830	magnesium ion transmembrane transport	1/263	20/18805	0.05	3.57509505703422	1.37223145579949	0.245598580149619	0.498804817950199	0.436299845554715	TUSC3	1
GO:1990182	exosomal secretion	1/263	20/18805	0.05	3.57509505703422	1.37223145579949	0.245598580149619	0.498804817950199	0.436299845554715	ATP13A2	1
GO:2000786	positive regulation of autophagosome assembly	1/263	20/18805	0.05	3.57509505703422	1.37223145579949	0.245598580149619	0.498804817950199	0.436299845554715	SNX30	1
GO:2001185	regulation of CD8-positive, alpha-beta T cell activation	1/263	20/18805	0.05	3.57509505703422	1.37223145579949	0.245598580149619	0.498804817950199	0.436299845554715	SOCS1	1
GO:0002833	positive regulation of response to biotic stimulus	8/263	425/18805	0.0188235294117647	1.34591813911877	0.859052596052949	0.245622946298327	0.498804817950199	0.436299845554715	MED1/CYBA/LTF/SASH1/CADM1/HPX/TNF/S100A9	8
GO:0009583	detection of light stimulus	2/263	68/18805	0.0294117647058824	2.10299709237307	1.08518430185305	0.24605491259266	0.498804817950199	0.436299845554715	GNGT1/REEP6	2
GO:0045668	negative regulation of osteoblast differentiation	2/263	68/18805	0.0294117647058824	2.10299709237307	1.08518430185305	0.24605491259266	0.498804817950199	0.436299845554715	TNF/CHRD	2
GO:0045682	regulation of epidermis development	2/263	68/18805	0.0294117647058824	2.10299709237307	1.08518430185305	0.24605491259266	0.498804817950199	0.436299845554715	MED1/SFN	2
GO:0051057	positive regulation of small GTPase mediated signal transduction	2/263	68/18805	0.0294117647058824	2.10299709237307	1.08518430185305	0.24605491259266	0.498804817950199	0.436299845554715	NET1/ERBB2	2
GO:0007160	cell-matrix adhesion	5/263	240/18805	0.0208333333333333	1.48962294043093	0.909168978643594	0.246147688615182	0.498804817950199	0.436299845554715	JUP/LIMCH1/FN1/EFNA5/PHLDB2	5
GO:0008406	gonad development	5/263	240/18805	0.0208333333333333	1.48962294043093	0.909168978643594	0.246147688615182	0.498804817950199	0.436299845554715	BMPR1B/GFRA1/PGR/TNFSF10/ROBO2	5
GO:0031929	TOR signaling	4/263	181/18805	0.0220994475138122	1.58015251139634	0.934049064191212	0.247932966182276	0.502113782157713	0.439194165177803	PRKACB/SESN3/PIM1/WDR24	4
GO:0070085	glycosylation	5/263	241/18805	0.020746887966805	1.48344193237934	0.899584089587031	0.248756657108861	0.503472472465416	0.440382598709467	GALNT3/TUSC3/GALNT7/SLC39A8/ENTPD5	5
GO:0071248	cellular response to metal ion	4/263	182/18805	0.021978021978022	1.57147035474032	0.922633640634803	0.25097465876002	0.505395164349363	0.442064359073095	MT1E/ATP13A2/SLC39A8/MT1G	4
GO:0006690	icosanoid metabolic process	3/263	124/18805	0.0241935483870968	1.72988470501656	0.971157687815922	0.251083845676677	0.505395164349363	0.442064359073095	GSTP1/FADS1/CYP2J2	3
GO:0030326	embryonic limb morphogenesis	3/263	124/18805	0.0241935483870968	1.72988470501656	0.971157687815922	0.251083845676677	0.505395164349363	0.442064359073095	MED1/FGFR1/FZD6	3
GO:0031644	regulation of nervous system process	3/263	124/18805	0.0241935483870968	1.72988470501656	0.971157687815922	0.251083845676677	0.505395164349363	0.442064359073095	TMEM98/TNF/RIMS2	3
GO:0035113	embryonic appendage morphogenesis	3/263	124/18805	0.0241935483870968	1.72988470501656	0.971157687815922	0.251083845676677	0.505395164349363	0.442064359073095	MED1/FGFR1/FZD6	3
GO:0043500	muscle adaptation	3/263	124/18805	0.0241935483870968	1.72988470501656	0.971157687815922	0.251083845676677	0.505395164349363	0.442064359073095	CYBA/TNNT1/RGS2	3
GO:0048511	rhythmic process	6/263	303/18805	0.0198019801980198	1.4158792305086	0.869168372664374	0.251088594331453	0.505395164349363	0.442064359073095	BMPR1B/PGR/KLF10/ID1/ROBO2/TNF	6
GO:0035567	non-canonical Wnt signaling pathway	2/263	69/18805	0.0289855072463768	2.07251887364303	1.06295714874537	0.251240448923902	0.505395164349363	0.442064359073095	CELSR2/FZD6	2
GO:0043525	positive regulation of neuron apoptotic process	2/263	69/18805	0.0289855072463768	2.07251887364303	1.06295714874537	0.251240448923902	0.505395164349363	0.442064359073095	TNF/NR3C1	2
GO:0045576	mast cell activation	2/263	69/18805	0.0289855072463768	2.07251887364303	1.06295714874537	0.251240448923902	0.505395164349363	0.442064359073095	STXBP1/RHOH	2
GO:0043010	camera-type eye development	7/263	366/18805	0.0191256830601093	1.36752	0.845630688414483	0.253111409339018	0.506858651026338	0.443344456995483	BMPR1B/KLF4/MED1/FRS2/RCN1/SLITRK6/BCAR3	7
GO:0042692	muscle cell differentiation	8/263	429/18805	0.0186480186480186	1.33336878584027	0.831864891438243	0.253389143674303	0.506858651026338	0.443344456995483	KRT19/TNNT1/FRS2/GDF15/MESP1/RGS2/FGFR2/RAMP2	8
GO:0046660	female sex differentiation	3/263	125/18805	0.024	1.71604562737643	0.956603520205805	0.254835743774972	0.506858651026338	0.443344456995483	BMPR1B/PGR/ROBO2	3
GO:0000028	ribosomal small subunit assembly	1/263	21/18805	0.0476190476190476	3.40485243527069	1.31319356951093	0.256160601625299	0.506858651026338	0.443344456995483	ERAL1	1
GO:0006337	nucleosome disassembly	1/263	21/18805	0.0476190476190476	3.40485243527069	1.31319356951093	0.256160601625299	0.506858651026338	0.443344456995483	ATAD2	1
GO:0006700	C21-steroid hormone biosynthetic process	1/263	21/18805	0.0476190476190476	3.40485243527069	1.31319356951093	0.256160601625299	0.506858651026338	0.443344456995483	STARD3	1
GO:0007398	ectoderm development	1/263	21/18805	0.0476190476190476	3.40485243527069	1.31319356951093	0.256160601625299	0.506858651026338	0.443344456995483	ETS2	1
GO:0009048	dosage compensation by inactivation of X chromosome	1/263	21/18805	0.0476190476190476	3.40485243527069	1.31319356951093	0.256160601625299	0.506858651026338	0.443344456995483	XIST	1
GO:0009067	aspartate family amino acid biosynthetic process	1/263	21/18805	0.0476190476190476	3.40485243527069	1.31319356951093	0.256160601625299	0.506858651026338	0.443344456995483	PLOD2	1
GO:0010829	negative regulation of D-glucose transmembrane transport	1/263	21/18805	0.0476190476190476	3.40485243527069	1.31319356951093	0.256160601625299	0.506858651026338	0.443344456995483	TNF	1
GO:0015693	magnesium ion transport	1/263	21/18805	0.0476190476190476	3.40485243527069	1.31319356951093	0.256160601625299	0.506858651026338	0.443344456995483	TUSC3	1
GO:0030502	negative regulation of bone mineralization	1/263	21/18805	0.0476190476190476	3.40485243527069	1.31319356951093	0.256160601625299	0.506858651026338	0.443344456995483	ECM1	1
GO:0032011	ARF protein signal transduction	1/263	21/18805	0.0476190476190476	3.40485243527069	1.31319356951093	0.256160601625299	0.506858651026338	0.443344456995483	PSD3	1
GO:0032012	regulation of ARF protein signal transduction	1/263	21/18805	0.0476190476190476	3.40485243527069	1.31319356951093	0.256160601625299	0.506858651026338	0.443344456995483	PSD3	1
GO:0032930	positive regulation of superoxide anion generation	1/263	21/18805	0.0476190476190476	3.40485243527069	1.31319356951093	0.256160601625299	0.506858651026338	0.443344456995483	GSTP1	1
GO:0042474	middle ear morphogenesis	1/263	21/18805	0.0476190476190476	3.40485243527069	1.31319356951093	0.256160601625299	0.506858651026338	0.443344456995483	FGFR1	1
GO:0044794	positive regulation by host of viral process	1/263	21/18805	0.0476190476190476	3.40485243527069	1.31319356951093	0.256160601625299	0.506858651026338	0.443344456995483	STOM	1
GO:0055070	copper ion homeostasis	1/263	21/18805	0.0476190476190476	3.40485243527069	1.31319356951093	0.256160601625299	0.506858651026338	0.443344456995483	CP	1
GO:0060973	cell migration involved in heart development	1/263	21/18805	0.0476190476190476	3.40485243527069	1.31319356951093	0.256160601625299	0.506858651026338	0.443344456995483	MESP1	1
GO:0061050	regulation of cell growth involved in cardiac muscle cell development	1/263	21/18805	0.0476190476190476	3.40485243527069	1.31319356951093	0.256160601625299	0.506858651026338	0.443344456995483	RGS2	1
GO:0071800	podosome assembly	1/263	21/18805	0.0476190476190476	3.40485243527069	1.31319356951093	0.256160601625299	0.506858651026338	0.443344456995483	TNF	1
GO:0090189	regulation of branching involved in ureteric bud morphogenesis	1/263	21/18805	0.0476190476190476	3.40485243527069	1.31319356951093	0.256160601625299	0.506858651026338	0.443344456995483	TACSTD2	1
GO:0090200	positive regulation of release of cytochrome c from mitochondria	1/263	21/18805	0.0476190476190476	3.40485243527069	1.31319356951093	0.256160601625299	0.506858651026338	0.443344456995483	TNFSF10	1
GO:0097734	extracellular exosome biogenesis	1/263	21/18805	0.0476190476190476	3.40485243527069	1.31319356951093	0.256160601625299	0.506858651026338	0.443344456995483	ATP13A2	1
GO:0099150	regulation of postsynaptic specialization assembly	1/263	21/18805	0.0476190476190476	3.40485243527069	1.31319356951093	0.256160601625299	0.506858651026338	0.443344456995483	FGFR1	1
GO:1905874	regulation of postsynaptic density organization	1/263	21/18805	0.0476190476190476	3.40485243527069	1.31319356951093	0.256160601625299	0.506858651026338	0.443344456995483	FGFR1	1
GO:2000738	positive regulation of stem cell differentiation	1/263	21/18805	0.0476190476190476	3.40485243527069	1.31319356951093	0.256160601625299	0.506858651026338	0.443344456995483	TACSTD2	1
GO:0010803	regulation of tumor necrosis factor-mediated signaling pathway	2/263	70/18805	0.0285714285714286	2.04291146116241	1.04110448796106	0.256428944236997	0.506858651026338	0.443344456995483	GSTP1/PYDC1	2
GO:0060113	inner ear receptor cell differentiation	2/263	70/18805	0.0285714285714286	2.04291146116241	1.04110448796106	0.256428944236997	0.506858651026338	0.443344456995483	SLITRK6/FGFR1	2
GO:0001659	temperature homeostasis	4/263	184/18805	0.0217391304347826	1.55438915523227	0.900008984233412	0.257081682460833	0.507844210856381	0.444206516835643	ID1/CXCR4/NOVA1/TNF	4
GO:0006805	xenobiotic metabolic process	3/263	126/18805	0.0238095238095238	1.70242621763534	0.942180001190494	0.258595577940169	0.50961269695745	0.44575339486287	GSTP1/NAT1/CYP2J2	3
GO:0010811	positive regulation of cell-substrate adhesion	3/263	126/18805	0.0238095238095238	1.70242621763534	0.942180001190494	0.258595577940169	0.50961269695745	0.44575339486287	JUP/FBLN2/FN1	3
GO:0061640	cytoskeleton-dependent cytokinesis	3/263	126/18805	0.0238095238095238	1.70242621763534	0.942180001190494	0.258595577940169	0.50961269695745	0.44575339486287	IQGAP2/SPART/TRIM36	3
GO:1903305	regulation of regulated secretory pathway	3/263	126/18805	0.0238095238095238	1.70242621763534	0.942180001190494	0.258595577940169	0.50961269695745	0.44575339486287	FBXL20/STXBP1/RIMS2	3
GO:0045137	development of primary sexual characteristics	5/263	245/18805	0.0204081632653061	1.45922247225887	0.861671831132302	0.25926250043096	0.510316570442063	0.446369066327089	BMPR1B/GFRA1/PGR/TNFSF10/ROBO2	5
GO:0045333	cellular respiration	5/263	245/18805	0.0204081632653061	1.45922247225887	0.861671831132302	0.25926250043096	0.510316570442063	0.446369066327089	DNAJC15/CISD1/AK4/TNF/COX6C	5
GO:0019730	antimicrobial humoral response	4/263	185/18805	0.0216216216216216	1.54598705169047	0.888798015744424	0.26014649166668	0.511445519117967	0.447356547031385	LTF/S100A7/CXCL8/S100A9	4
GO:0071478	cellular response to radiation	4/263	185/18805	0.0216216216216216	1.54598705169047	0.888798015744424	0.26014649166668	0.511445519117967	0.447356547031385	NET1/GADD45A/TSPYL5/TNF	4
GO:0030225	macrophage differentiation	2/263	71/18805	0.028169014084507	2.01413806030097	1.01961380164122	0.261619305893656	0.513116436261665	0.448818082416561	SOCS1/NR3C1	2
GO:0045600	positive regulation of fat cell differentiation	2/263	71/18805	0.028169014084507	2.01413806030097	1.01961380164122	0.261619305893656	0.513116436261665	0.448818082416561	ADIRF/PIM1	2
GO:0050435	amyloid-beta metabolic process	2/263	71/18805	0.028169014084507	2.01413806030097	1.01961380164122	0.261619305893656	0.513116436261665	0.448818082416561	BACE2/TNF	2
GO:1902808	positive regulation of cell cycle G1/S phase transition	2/263	71/18805	0.028169014084507	2.01413806030097	1.01961380164122	0.261619305893656	0.513116436261665	0.448818082416561	ANXA1/CDC6	2
GO:0071219	cellular response to molecule of bacterial origin	5/263	246/18805	0.0203252032520325	1.45329067359115	0.852298567274521	0.261905628049735	0.513372423809565	0.449041992297928	GSTP1/LTF/SASH1/TNF/CXCL8	5
GO:0002688	regulation of leukocyte chemotaxis	3/263	127/18805	0.0236220472440945	1.68902128678782	0.927884716538309	0.262362875945858	0.51365756164088	0.449291399655852	MTUS1/S100A7/CXCL8	3
GO:0022900	electron transport chain	3/263	127/18805	0.0236220472440945	1.68902128678782	0.927884716538309	0.262362875945858	0.51365756164088	0.449291399655852	DNAJC15/DHRS2/COX6C	3
GO:0031348	negative regulation of defense response	6/263	308/18805	0.0194805194805195	1.39289417806528	0.827989845389629	0.262796679342361	0.513816774976106	0.44943066205082	GSTP1/KLF4/SLC39A8/SFN/SOCS3/PIM1	6
GO:0006959	humoral immune response	6/263	309/18805	0.0194174757281553	1.3883864299162	0.819839966308642	0.265155544750337	0.513816774976106	0.44943066205082	LTF/HPX/TNF/S100A7/CXCL8/S100A9	6
GO:0006906	vesicle fusion	3/263	128/18805	0.0234375	1.67582580798479	0.913715316223467	0.266137170419757	0.513816774976106	0.44943066205082	ATP13A2/STXBP1/ANXA1	3
GO:0009185	ribonucleoside diphosphate metabolic process	3/263	128/18805	0.0234375	1.67582580798479	0.913715316223467	0.266137170419757	0.513816774976106	0.44943066205082	AK4/ENTPD5/ENTPD4	3
GO:0030278	regulation of ossification	3/263	128/18805	0.0234375	1.67582580798479	0.913715316223467	0.266137170419757	0.513816774976106	0.44943066205082	BMPR1B/LTF/ECM1	3
GO:0001780	neutrophil homeostasis	1/263	22/18805	0.0454545454545455	3.25008641548565	1.25762964477124	0.266575303593599	0.513816774976106	0.44943066205082	ANXA1	1
GO:0002089	lens morphogenesis in camera-type eye	1/263	22/18805	0.0454545454545455	3.25008641548565	1.25762964477124	0.266575303593599	0.513816774976106	0.44943066205082	BCAR3	1
GO:0002093	auditory receptor cell morphogenesis	1/263	22/18805	0.0454545454545455	3.25008641548565	1.25762964477124	0.266575303593599	0.513816774976106	0.44943066205082	SLITRK6	1
GO:0003228	atrial cardiac muscle tissue development	1/263	22/18805	0.0454545454545455	3.25008641548565	1.25762964477124	0.266575303593599	0.513816774976106	0.44943066205082	MESP1	1
GO:0006662	glycerol ether metabolic process	1/263	22/18805	0.0454545454545455	3.25008641548565	1.25762964477124	0.266575303593599	0.513816774976106	0.44943066205082	FASN	1
GO:0016237	microautophagy	1/263	22/18805	0.0454545454545455	3.25008641548565	1.25762964477124	0.266575303593599	0.513816774976106	0.44943066205082	SNX30	1
GO:0031340	positive regulation of vesicle fusion	1/263	22/18805	0.0454545454545455	3.25008641548565	1.25762964477124	0.266575303593599	0.513816774976106	0.44943066205082	ANXA1	1
GO:0031630	regulation of synaptic vesicle fusion to presynaptic active zone membrane	1/263	22/18805	0.0454545454545455	3.25008641548565	1.25762964477124	0.266575303593599	0.513816774976106	0.44943066205082	STXBP1	1
GO:0035809	regulation of urine volume	1/263	22/18805	0.0454545454545455	3.25008641548565	1.25762964477124	0.266575303593599	0.513816774976106	0.44943066205082	MLLT6	1
GO:0046485	ether lipid metabolic process	1/263	22/18805	0.0454545454545455	3.25008641548565	1.25762964477124	0.266575303593599	0.513816774976106	0.44943066205082	FASN	1
GO:0061709	reticulophagy	1/263	22/18805	0.0454545454545455	3.25008641548565	1.25762964477124	0.266575303593599	0.513816774976106	0.44943066205082	SNX30	1
GO:0071498	cellular response to fluid shear stress	1/263	22/18805	0.0454545454545455	3.25008641548565	1.25762964477124	0.266575303593599	0.513816774976106	0.44943066205082	KLF4	1
GO:0098801	regulation of renal system process	1/263	22/18805	0.0454545454545455	3.25008641548565	1.25762964477124	0.266575303593599	0.513816774976106	0.44943066205082	STC1	1
GO:1901632	regulation of synaptic vesicle membrane organization	1/263	22/18805	0.0454545454545455	3.25008641548565	1.25762964477124	0.266575303593599	0.513816774976106	0.44943066205082	STXBP1	1
GO:1902004	positive regulation of amyloid-beta formation	1/263	22/18805	0.0454545454545455	3.25008641548565	1.25762964477124	0.266575303593599	0.513816774976106	0.44943066205082	TNF	1
GO:1904889	regulation of excitatory synapse assembly	1/263	22/18805	0.0454545454545455	3.25008641548565	1.25762964477124	0.266575303593599	0.513816774976106	0.44943066205082	FGFR1	1
GO:1905038	regulation of membrane lipid metabolic process	1/263	22/18805	0.0454545454545455	3.25008641548565	1.25762964477124	0.266575303593599	0.513816774976106	0.44943066205082	TNF	1
GO:1905146	lysosomal protein catabolic process	1/263	22/18805	0.0454545454545455	3.25008641548565	1.25762964477124	0.266575303593599	0.513816774976106	0.44943066205082	ATP13A2	1
GO:2000725	regulation of cardiac muscle cell differentiation	1/263	22/18805	0.0454545454545455	3.25008641548565	1.25762964477124	0.266575303593599	0.513816774976106	0.44943066205082	FRS2	1
GO:0051148	negative regulation of muscle cell differentiation	2/263	72/18805	0.0277777777777778	1.98616392057457	0.998473167501538	0.266810471011872	0.513816774976106	0.44943066205082	FRS2/RGS2	2
GO:0072577	endothelial cell apoptotic process	2/263	72/18805	0.0277777777777778	1.98616392057457	0.998473167501538	0.266810471011872	0.513816774976106	0.44943066205082	RAMP2/TNF	2
GO:0140895	cell surface toll-like receptor signaling pathway	2/263	72/18805	0.0277777777777778	1.98616392057457	0.998473167501538	0.266810471011872	0.513816774976106	0.44943066205082	CYBA/LTF	2
GO:2000134	negative regulation of G1/S transition of mitotic cell cycle	2/263	72/18805	0.0277777777777778	1.98616392057457	0.998473167501538	0.266810471011872	0.513816774976106	0.44943066205082	KLF4/CDKN2B	2
GO:0031345	negative regulation of cell projection organization	4/263	188/18805	0.0212765957446809	1.52131704554648	0.85556046474064	0.269382998969032	0.518165196499101	0.453234185133628	EVL/PMP22/SPART/TACSTD2	4
GO:0051345	positive regulation of hydrolase activity	4/263	188/18805	0.0212765957446809	1.52131704554648	0.85556046474064	0.269382998969032	0.518165196499101	0.453234185133628	NET1/FGFR1/FGFR2/BCAR3	4
GO:0051146	striated muscle cell differentiation	6/263	311/18805	0.0192926045016077	1.37945789982028	0.80362432447576	0.269889606341765	0.518836786987231	0.453821618966868	KRT19/TNNT1/FRS2/GDF15/MESP1/RGS2	6
GO:0016236	macroautophagy	7/263	374/18805	0.018716577540107	1.33827087696468	0.786956393344672	0.270212202383679	0.519154056474765	0.454099131579876	HSPB8/ATP13A2/SESN3/CTSK/SPART/WDR24/SNX30	7
GO:0014015	positive regulation of gliogenesis	2/263	73/18805	0.0273972602739726	1.95895619563519	0.977671222509853	0.272001405852765	0.520424325752396	0.455210224074773	CXCR4/TNF	2
GO:0015800	acidic amino acid transport	2/263	73/18805	0.0273972602739726	1.95895619563519	0.977671222509853	0.272001405852765	0.520424325752396	0.455210224074773	STXBP1/TNF	2
GO:0033143	regulation of intracellular steroid hormone receptor signaling pathway	2/263	73/18805	0.0273972602739726	1.95895619563519	0.977671222509853	0.272001405852765	0.520424325752396	0.455210224074773	MED1/LBH	2
GO:0060415	muscle tissue morphogenesis	2/263	73/18805	0.0273972602739726	1.95895619563519	0.977671222509853	0.272001405852765	0.520424325752396	0.455210224074773	MED1/FGFR2	2
GO:0030072	peptide hormone secretion	5/263	250/18805	0.02	1.43003802281369	0.815212984836564	0.272539864262106	0.520424325752396	0.455210224074773	FAM3B/SLC30A8/EFNA5/TNF/RIMS2	5
GO:0002824	positive regulation of adaptive immune response based on somatic recombination of immune receptors built from immunoglobulin superfamily domains	3/263	130/18805	0.0230769230769231	1.65004387247733	0.885745076386324	0.27370490385082	0.520424325752396	0.455210224074773	IL1R1/HPX/TNF	3
GO:0055007	cardiac muscle cell differentiation	3/263	130/18805	0.0230769230769231	1.65004387247733	0.885745076386324	0.27370490385082	0.520424325752396	0.455210224074773	FRS2/MESP1/RGS2	3
GO:0090174	organelle membrane fusion	3/263	130/18805	0.0230769230769231	1.65004387247733	0.885745076386324	0.27370490385082	0.520424325752396	0.455210224074773	ATP13A2/STXBP1/ANXA1	3
GO:0098659	inorganic cation import across plasma membrane	3/263	130/18805	0.0230769230769231	1.65004387247733	0.885745076386324	0.27370490385082	0.520424325752396	0.455210224074773	SLC39A8/STEAP2/SLC30A8	3
GO:0099587	inorganic ion import across plasma membrane	3/263	130/18805	0.0230769230769231	1.65004387247733	0.885745076386324	0.27370490385082	0.520424325752396	0.455210224074773	SLC39A8/STEAP2/SLC30A8	3
GO:0008654	phospholipid biosynthetic process	5/263	251/18805	0.0199203187250996	1.42434	0.806041568489219	0.275213033896507	0.520424325752396	0.455210224074773	PGAP3/MBOAT2/PIK3C2G/IMPA2/FADS1	5
GO:0048736	appendage development	4/263	190/18805	0.0210526315789474	1.50530318190915	0.833723456425354	0.27557316779389	0.520424325752396	0.455210224074773	MED1/FGFR1/FZD6/FGFR2	4
GO:0060173	limb development	4/263	190/18805	0.0210526315789474	1.50530318190915	0.833723456425354	0.27557316779389	0.520424325752396	0.455210224074773	MED1/FGFR1/FZD6/FGFR2	4
GO:0006525	arginine metabolic process	1/263	23/18805	0.0434782608695652	3.10877831046454	1.20517089008182	0.276844733139193	0.520424325752396	0.455210224074773	SLC39A8	1
GO:0006658	phosphatidylserine metabolic process	1/263	23/18805	0.0434782608695652	3.10877831046454	1.20517089008182	0.276844733139193	0.520424325752396	0.455210224074773	MBOAT2	1
GO:0007549	sex-chromosome dosage compensation	1/263	23/18805	0.0434782608695652	3.10877831046454	1.20517089008182	0.276844733139193	0.520424325752396	0.455210224074773	XIST	1
GO:0010888	negative regulation of lipid storage	1/263	23/18805	0.0434782608695652	3.10877831046454	1.20517089008182	0.276844733139193	0.520424325752396	0.455210224074773	TNF	1
GO:0023019	signal transduction involved in regulation of gene expression	1/263	23/18805	0.0434782608695652	3.10877831046454	1.20517089008182	0.276844733139193	0.520424325752396	0.455210224074773	MESP1	1
GO:0032253	dense core granule localization	1/263	23/18805	0.0434782608695652	3.10877831046454	1.20517089008182	0.276844733139193	0.520424325752396	0.455210224074773	STXBP1	1
GO:0032928	regulation of superoxide anion generation	1/263	23/18805	0.0434782608695652	3.10877831046454	1.20517089008182	0.276844733139193	0.520424325752396	0.455210224074773	GSTP1	1
GO:0034656	nucleobase-containing small molecule catabolic process	1/263	23/18805	0.0434782608695652	3.10877831046454	1.20517089008182	0.276844733139193	0.520424325752396	0.455210224074773	ENTPD4	1
GO:0035493	SNARE complex assembly	1/263	23/18805	0.0434782608695652	3.10877831046454	1.20517089008182	0.276844733139193	0.520424325752396	0.455210224074773	STXBP1	1
GO:0035855	megakaryocyte development	1/263	23/18805	0.0434782608695652	3.10877831046454	1.20517089008182	0.276844733139193	0.520424325752396	0.455210224074773	MED1	1
GO:0036092	phosphatidylinositol-3-phosphate biosynthetic process	1/263	23/18805	0.0434782608695652	3.10877831046454	1.20517089008182	0.276844733139193	0.520424325752396	0.455210224074773	PIK3C2G	1
GO:0044804	nucleophagy	1/263	23/18805	0.0434782608695652	3.10877831046454	1.20517089008182	0.276844733139193	0.520424325752396	0.455210224074773	SNX30	1
GO:0046033	AMP metabolic process	1/263	23/18805	0.0434782608695652	3.10877831046454	1.20517089008182	0.276844733139193	0.520424325752396	0.455210224074773	AK4	1
GO:0050908	detection of light stimulus involved in visual perception	1/263	23/18805	0.0434782608695652	3.10877831046454	1.20517089008182	0.276844733139193	0.520424325752396	0.455210224074773	REEP6	1
GO:0050962	detection of light stimulus involved in sensory perception	1/263	23/18805	0.0434782608695652	3.10877831046454	1.20517089008182	0.276844733139193	0.520424325752396	0.455210224074773	REEP6	1
GO:0050999	regulation of nitric-oxide synthase activity	1/263	23/18805	0.0434782608695652	3.10877831046454	1.20517089008182	0.276844733139193	0.520424325752396	0.455210224074773	S100A1	1
GO:0051957	positive regulation of amino acid transport	1/263	23/18805	0.0434782608695652	3.10877831046454	1.20517089008182	0.276844733139193	0.520424325752396	0.455210224074773	STXBP1	1
GO:0060143	positive regulation of syncytium formation by plasma membrane fusion	1/263	23/18805	0.0434782608695652	3.10877831046454	1.20517089008182	0.276844733139193	0.520424325752396	0.455210224074773	GDF15	1
GO:0060352	cell adhesion molecule production	1/263	23/18805	0.0434782608695652	3.10877831046454	1.20517089008182	0.276844733139193	0.520424325752396	0.455210224074773	CXCL8	1
GO:0090026	positive regulation of monocyte chemotaxis	1/263	23/18805	0.0434782608695652	3.10877831046454	1.20517089008182	0.276844733139193	0.520424325752396	0.455210224074773	S100A7	1
GO:0140112	extracellular vesicle biogenesis	1/263	23/18805	0.0434782608695652	3.10877831046454	1.20517089008182	0.276844733139193	0.520424325752396	0.455210224074773	ATP13A2	1
GO:1902074	response to salt	1/263	23/18805	0.0434782608695652	3.10877831046454	1.20517089008182	0.276844733139193	0.520424325752396	0.455210224074773	FGFR1	1
GO:2000272	negative regulation of signaling receptor activity	1/263	23/18805	0.0434782608695652	3.10877831046454	1.20517089008182	0.276844733139193	0.520424325752396	0.455210224074773	TNF	1
GO:0030514	negative regulation of BMP signaling pathway	2/263	74/18805	0.027027027027027	1.93248381461309	0.957197129247988	0.277191105218651	0.520424325752396	0.455210224074773	SPART/CHRD	2
GO:0051865	protein autoubiquitination	2/263	74/18805	0.027027027027027	1.93248381461309	0.957197129247988	0.277191105218651	0.520424325752396	0.455210224074773	SASH1/RNF19B	2
GO:0060411	cardiac septum morphogenesis	2/263	74/18805	0.027027027027027	1.93248381461309	0.957197129247988	0.277191105218651	0.520424325752396	0.455210224074773	ROBO2/FGFR2	2
GO:1902475	L-alpha-amino acid transmembrane transport	2/263	74/18805	0.027027027027027	1.93248381461309	0.957197129247988	0.277191105218651	0.520424325752396	0.455210224074773	TNF/SLC43A1	2
GO:0043200	response to amino acid	3/263	131/18805	0.0229007633587786	1.6374481177256	0.871939838442396	0.277497432767226	0.520702756815496	0.45545376508612	SESN3/SOCS1/TNF	3
GO:0007179	transforming growth factor beta receptor signaling pathway	5/263	252/18805	0.0198412698412698	1.41868851469612	0.79690940602414	0.277891720382781	0.521145827354162	0.45584131468595	LDLRAD4/GDF15/ID1/FMOD/CDKN2B	5
GO:0002237	response to molecule of bacterial origin	7/263	379/18805	0.0184696569920844	1.32061558835037	0.750954134407078	0.281056217946628	0.526692500228229	0.46069293686603	GSTP1/LTF/SASH1/FGFR2/TNF/S100A7/CXCL8	7
GO:0051283	negative regulation of sequestering of calcium ion	3/263	132/18805	0.0227272727272727	1.62504320774283	0.858251684024327	0.281295138152959	0.526692500228229	0.46069293686603	CYBA/ITPR2/ANXA6	3
GO:1901991	negative regulation of mitotic cell cycle phase transition	4/263	192/18805	0.0208333333333333	1.48962294043093	0.812136240129157	0.281786959037978	0.526692500228229	0.46069293686603	KLF4/TEX14/CDC6/CDKN2B	4
GO:0003170	heart valve development	2/263	75/18805	0.0266666666666667	1.90671736375158	0.937040544725946	0.282378591862143	0.526692500228229	0.46069293686603	SNAI1/ROBO2	2
GO:0030239	myofibril assembly	2/263	75/18805	0.0266666666666667	1.90671736375158	0.937040544725946	0.282378591862143	0.526692500228229	0.46069293686603	KRT19/TNNT1	2
GO:0042490	mechanoreceptor differentiation	2/263	75/18805	0.0266666666666667	1.90671736375158	0.937040544725946	0.282378591862143	0.526692500228229	0.46069293686603	SLITRK6/FGFR1	2
GO:0046635	positive regulation of alpha-beta T cell activation	2/263	75/18805	0.0266666666666667	1.90671736375158	0.937040544725946	0.282378591862143	0.526692500228229	0.46069293686603	SOCS1/ANXA1	2
GO:0072527	pyrimidine-containing compound metabolic process	2/263	75/18805	0.0266666666666667	1.90671736375158	0.937040544725946	0.282378591862143	0.526692500228229	0.46069293686603	ENTPD5/ENTPD4	2
GO:0034599	cellular response to oxidative stress	5/263	254/18805	0.0196850393700787	1.40751773898985	0.778761406444709	0.283264991706319	0.526692500228229	0.46069293686603	NET1/ATP13A2/DHRS2/GPX8/FADS2	5
GO:0007254	JNK cascade	4/263	193/18805	0.0207253886010363	1.48190468685356	0.801434418645142	0.284902083165682	0.526692500228229	0.46069293686603	GSTP1/TRAF4/GADD45A/TNF	4
GO:0038061	non-canonical NF-kappaB signal transduction	3/263	133/18805	0.0225563909774436	1.6128248377598	0.844678552823207	0.285097577587646	0.526692500228229	0.46069293686603	SASH1/NLRP2/TNF	3
GO:0002115	store-operated calcium entry	1/263	24/18805	0.0416666666666667	2.97924588086185	1.15550205296106	0.286970909008876	0.526692500228229	0.46069293686603	STC2	1
GO:0002320	lymphoid progenitor cell differentiation	1/263	24/18805	0.0416666666666667	2.97924588086185	1.15550205296106	0.286970909008876	0.526692500228229	0.46069293686603	BATF	1
GO:0003177	pulmonary valve development	1/263	24/18805	0.0416666666666667	2.97924588086185	1.15550205296106	0.286970909008876	0.526692500228229	0.46069293686603	ROBO2	1
GO:0006123	mitochondrial electron transport, cytochrome c to oxygen	1/263	24/18805	0.0416666666666667	2.97924588086185	1.15550205296106	0.286970909008876	0.526692500228229	0.46069293686603	COX6C	1
GO:0007263	nitric oxide mediated signal transduction	1/263	24/18805	0.0416666666666667	2.97924588086185	1.15550205296106	0.286970909008876	0.526692500228229	0.46069293686603	RASD1	1
GO:0008156	negative regulation of DNA replication	1/263	24/18805	0.0416666666666667	2.97924588086185	1.15550205296106	0.286970909008876	0.526692500228229	0.46069293686603	CDC6	1
GO:0009147	pyrimidine nucleoside triphosphate metabolic process	1/263	24/18805	0.0416666666666667	2.97924588086185	1.15550205296106	0.286970909008876	0.526692500228229	0.46069293686603	ENTPD4	1
GO:0014059	regulation of dopamine secretion	1/263	24/18805	0.0416666666666667	2.97924588086185	1.15550205296106	0.286970909008876	0.526692500228229	0.46069293686603	SNCG	1
GO:0030318	melanocyte differentiation	1/263	24/18805	0.0416666666666667	2.97924588086185	1.15550205296106	0.286970909008876	0.526692500228229	0.46069293686603	LRMDA	1
GO:0032098	regulation of appetite	1/263	24/18805	0.0416666666666667	2.97924588086185	1.15550205296106	0.286970909008876	0.526692500228229	0.46069293686603	GDF15	1
GO:0035162	embryonic hemopoiesis	1/263	24/18805	0.0416666666666667	2.97924588086185	1.15550205296106	0.286970909008876	0.526692500228229	0.46069293686603	MED1	1
GO:0035335	peptidyl-tyrosine dephosphorylation	1/263	24/18805	0.0416666666666667	2.97924588086185	1.15550205296106	0.286970909008876	0.526692500228229	0.46069293686603	DUSP5	1
GO:0042430	indole-containing compound metabolic process	1/263	24/18805	0.0416666666666667	2.97924588086185	1.15550205296106	0.286970909008876	0.526692500228229	0.46069293686603	KYNU	1
GO:0042531	positive regulation of tyrosine phosphorylation of STAT protein	1/263	24/18805	0.0416666666666667	2.97924588086185	1.15550205296106	0.286970909008876	0.526692500228229	0.46069293686603	ERBB4	1
GO:0045591	positive regulation of regulatory T cell differentiation	1/263	24/18805	0.0416666666666667	2.97924588086185	1.15550205296106	0.286970909008876	0.526692500228229	0.46069293686603	SOCS1	1
GO:0045822	negative regulation of heart contraction	1/263	24/18805	0.0416666666666667	2.97924588086185	1.15550205296106	0.286970909008876	0.526692500228229	0.46069293686603	TNF	1
GO:0046597	host-mediated suppression of symbiont invasion	1/263	24/18805	0.0416666666666667	2.97924588086185	1.15550205296106	0.286970909008876	0.526692500228229	0.46069293686603	LY6E	1
GO:0051560	mitochondrial calcium ion homeostasis	1/263	24/18805	0.0416666666666667	2.97924588086185	1.15550205296106	0.286970909008876	0.526692500228229	0.46069293686603	ANXA6	1
GO:0051590	positive regulation of neurotransmitter transport	1/263	24/18805	0.0416666666666667	2.97924588086185	1.15550205296106	0.286970909008876	0.526692500228229	0.46069293686603	STXBP1	1
GO:0060252	positive regulation of glial cell proliferation	1/263	24/18805	0.0416666666666667	2.97924588086185	1.15550205296106	0.286970909008876	0.526692500228229	0.46069293686603	TNF	1
GO:0060571	morphogenesis of an epithelial fold	1/263	24/18805	0.0416666666666667	2.97924588086185	1.15550205296106	0.286970909008876	0.526692500228229	0.46069293686603	FGFR2	1
GO:0061952	midbody abscission	1/263	24/18805	0.0416666666666667	2.97924588086185	1.15550205296106	0.286970909008876	0.526692500228229	0.46069293686603	SPART	1
GO:0141156	cAMP/PKA signal transduction	1/263	24/18805	0.0416666666666667	2.97924588086185	1.15550205296106	0.286970909008876	0.526692500228229	0.46069293686603	SFN	1
GO:1900407	regulation of cellular response to oxidative stress	1/263	24/18805	0.0416666666666667	2.97924588086185	1.15550205296106	0.286970909008876	0.526692500228229	0.46069293686603	FADS2	1
GO:0060537	muscle tissue development	8/263	446/18805	0.0179372197309417	1.28254531194053	0.719210023325783	0.287207666569707	0.526692500228229	0.46069293686603	MED1/FRS2/MESP1/FGFR1/PIM1/ERBB4/RGS2/FGFR2	8
GO:0000380	alternative mRNA splicing, via spliceosome	2/263	76/18805	0.0263157894736842	1.88162897738643	0.917191591439361	0.287562915906095	0.526692500228229	0.46069293686603	RBPMS/NOVA1	2
GO:0006081	aldehyde metabolic process	2/263	76/18805	0.0263157894736842	1.88162897738643	0.917191591439361	0.287562915906095	0.526692500228229	0.46069293686603	AKR7A3/ALDH3B2	2
GO:0032008	positive regulation of TOR signaling	2/263	76/18805	0.0263157894736842	1.88162897738643	0.917191591439361	0.287562915906095	0.526692500228229	0.46069293686603	PIM1/WDR24	2
GO:0050709	negative regulation of protein secretion	2/263	76/18805	0.0263157894736842	1.88162897738643	0.917191591439361	0.287562915906095	0.526692500228229	0.46069293686603	RAB11FIP1/SERGEF	2
GO:0061077	chaperone-mediated protein folding	2/263	76/18805	0.0263157894736842	1.88162897738643	0.917191591439361	0.287562915906095	0.526692500228229	0.46069293686603	FKBP5/BAG1	2
GO:0062208	positive regulation of pattern recognition receptor signaling pathway	2/263	76/18805	0.0263157894736842	1.88162897738643	0.917191591439361	0.287562915906095	0.526692500228229	0.46069293686603	CYBA/LTF	2
GO:0008217	regulation of blood pressure	4/263	194/18805	0.0206185567010309	1.47426600290071	0.790792809116783	0.288022359702421	0.527240930677488	0.461172643780836	NPY1R/RAMP2/TNF/PRCP	4
GO:0090257	regulation of muscle system process	5/263	256/18805	0.0195312	1.39652150665399	0.760766160994308	0.288658377505742	0.527390423168245	0.461303403445302	TNNT1/JUP/RGS2/ANXA6/STC1	5
GO:0006354	DNA-templated transcription elongation	3/263	134/18805	0.0223880597014925	1.60078883150786	0.831218436797818	0.288904313753773	0.527390423168245	0.461303403445302	MED1/CDK12/EPOP	3
GO:0009132	nucleoside diphosphate metabolic process	3/263	134/18805	0.0223880597014925	1.60078883150786	0.831218436797818	0.288904313753773	0.527390423168245	0.461303403445302	AK4/ENTPD5/ENTPD4	3
GO:0051282	regulation of sequestering of calcium ion	3/263	134/18805	0.0223880597014925	1.60078883150786	0.831218436797818	0.288904313753773	0.527390423168245	0.461303403445302	CYBA/ITPR2/ANXA6	3
GO:0072175	epithelial tube formation	3/263	134/18805	0.0223880597014925	1.60078883150786	0.831218436797818	0.288904313753773	0.527390423168245	0.461303403445302	PRKACB/FZD6/FGFR2	3
GO:0002790	peptide secretion	5/263	257/18805	0.0194552529182879	1.39108757083044	0.751824958570085	0.291362208591451	0.531582767059153	0.46497040690295	FAM3B/SLC30A8/EFNA5/TNF/RIMS2	5
GO:0002832	negative regulation of response to biotic stimulus	3/263	135/18805	0.0222222222222222	1.58893113645965	0.817869378459769	0.292714914466722	0.531746798971059	0.46511388406126	LTF/SFN/PIM1	3
GO:0021782	glial cell development	3/263	135/18805	0.0222222222222222	1.58893113645965	0.817869378459769	0.292714914466722	0.531746798971059	0.46511388406126	ERBB2/TNF/S100A9	3
GO:0006801	superoxide metabolic process	2/263	77/18805	0.025974025974026	1.85719223742037	0.897640830481437	0.292743154274203	0.531746798971059	0.46511388406126	GSTP1/CYBA	2
GO:0045669	positive regulation of osteoblast differentiation	2/263	77/18805	0.025974025974026	1.85719223742037	0.897640830481437	0.292743154274203	0.531746798971059	0.46511388406126	BMPR1B/LTF	2
GO:0048488	synaptic vesicle endocytosis	2/263	77/18805	0.025974025974026	1.85719223742037	0.897640830481437	0.292743154274203	0.531746798971059	0.46511388406126	MX1/SNCG	2
GO:0051966	regulation of synaptic transmission, glutamatergic	2/263	77/18805	0.025974025974026	1.85719223742037	0.897640830481437	0.292743154274203	0.531746798971059	0.46511388406126	STXBP1/TNF	2
GO:0170035	L-amino acid catabolic process	2/263	77/18805	0.025974025974026	1.85719223742037	0.897640830481437	0.292743154274203	0.531746798971059	0.46511388406126	QDPR/KYNU	2
GO:0170040	proteinogenic amino acid catabolic process	2/263	77/18805	0.025974025974026	1.85719223742037	0.897640830481437	0.292743154274203	0.531746798971059	0.46511388406126	QDPR/KYNU	2
GO:0099003	vesicle-mediated transport in synapse	5/263	258/18805	0.0193798449612403	1.3856957585404	0.742920918728225	0.294070583472073	0.533210842686147	0.466394469219606	FBXL20/MX1/STXBP1/RIMS2/SNCG	5
GO:0034504	protein localization to nucleus	6/263	322/18805	0.0186335403726708	1.33233356162766	0.71637531618915	0.296277868318373	0.533210842686147	0.466394469219606	MED1/PGR/TMEM98/ATP13A2/JUP/RPL23	6
GO:0002821	positive regulation of adaptive immune response	3/263	136/18805	0.0220588235294118	1.5772478192798	0.804629469227314	0.296528952701808	0.533210842686147	0.466394469219606	IL1R1/HPX/TNF	3
GO:0002407	dendritic cell chemotaxis	1/263	25/18805	0.04	2.86007604562738	1.10835176543119	0.296955822002363	0.533210842686147	0.466394469219606	CXCR4	1
GO:0006925	inflammatory cell apoptotic process	1/263	25/18805	0.04	2.86007604562738	1.10835176543119	0.296955822002363	0.533210842686147	0.466394469219606	ANXA1	1
GO:0007350	blastoderm segmentation	1/263	25/18805	0.04	2.86007604562738	1.10835176543119	0.296955822002363	0.533210842686147	0.466394469219606	FRS2	1
GO:0010561	negative regulation of glycoprotein biosynthetic process	1/263	25/18805	0.04	2.86007604562738	1.10835176543119	0.296955822002363	0.533210842686147	0.466394469219606	BACE2	1
GO:0010954	positive regulation of protein processing	1/263	25/18805	0.04	2.86007604562738	1.10835176543119	0.296955822002363	0.533210842686147	0.466394469219606	HPN	1
GO:0032288	myelin assembly	1/263	25/18805	0.04	2.86007604562738	1.10835176543119	0.296955822002363	0.533210842686147	0.466394469219606	PMP22	1
GO:0034453	microtubule anchoring	1/263	25/18805	0.04	2.86007604562738	1.10835176543119	0.296955822002363	0.533210842686147	0.466394469219606	PCM1	1
GO:0043302	positive regulation of leukocyte degranulation	1/263	25/18805	0.04	2.86007604562738	1.10835176543119	0.296955822002363	0.533210842686147	0.466394469219606	STXBP1	1
GO:0044090	positive regulation of vacuole organization	1/263	25/18805	0.04	2.86007604562738	1.10835176543119	0.296955822002363	0.533210842686147	0.466394469219606	SNX30	1
GO:0046039	GTP metabolic process	1/263	25/18805	0.04	2.86007604562738	1.10835176543119	0.296955822002363	0.533210842686147	0.466394469219606	AK4	1
GO:0051016	barbed-end actin filament capping	1/263	25/18805	0.04	2.86007604562738	1.10835176543119	0.296955822002363	0.533210842686147	0.466394469219606	ADD3	1
GO:0051457	maintenance of protein location in nucleus	1/263	25/18805	0.04	2.86007604562738	1.10835176543119	0.296955822002363	0.533210842686147	0.466394469219606	PGR	1
GO:0070233	negative regulation of T cell apoptotic process	1/263	25/18805	0.04	2.86007604562738	1.10835176543119	0.296955822002363	0.533210842686147	0.466394469219606	PIP	1
GO:0090280	positive regulation of calcium ion import	1/263	25/18805	0.04	2.86007604562738	1.10835176543119	0.296955822002363	0.533210842686147	0.466394469219606	STC1	1
GO:0090335	regulation of brown fat cell differentiation	1/263	25/18805	0.04	2.86007604562738	1.10835176543119	0.296955822002363	0.533210842686147	0.466394469219606	PIM1	1
GO:0097150	neuronal stem cell population maintenance	1/263	25/18805	0.04	2.86007604562738	1.10835176543119	0.296955822002363	0.533210842686147	0.466394469219606	PCM1	1
GO:1901071	glucosamine-containing compound metabolic process	1/263	25/18805	0.04	2.86007604562738	1.10835176543119	0.296955822002363	0.533210842686147	0.466394469219606	CHI3L2	1
GO:1901623	regulation of lymphocyte chemotaxis	1/263	25/18805	0.04	2.86007604562738	1.10835176543119	0.296955822002363	0.533210842686147	0.466394469219606	S100A7	1
GO:0002637	regulation of immunoglobulin production	2/263	78/18805	0.0256410256410256	1.83338208053037	0.878379236538777	0.297918410132078	0.533210842686147	0.466394469219606	HPX/TNF	2
GO:0009620	response to fungus	2/263	78/18805	0.0256410256410256	1.83338208053037	0.878379236538777	0.297918410132078	0.533210842686147	0.466394469219606	LTF/S100A9	2
GO:0032729	positive regulation of type II interferon production	2/263	78/18805	0.0256410256410256	1.83338208053037	0.878379236538777	0.297918410132078	0.533210842686147	0.466394469219606	IL1R1/TNF	2
GO:0043536	positive regulation of blood vessel endothelial cell migration	2/263	78/18805	0.0256410256410256	1.83338208053037	0.878379236538777	0.297918410132078	0.533210842686147	0.466394469219606	FGFR1/ANXA1	2
GO:0097120	receptor localization to synapse	2/263	78/18805	0.0256410256410256	1.83338208053037	0.878379236538777	0.297918410132078	0.533210842686147	0.466394469219606	ERBB2/ERBB4	2
GO:1903533	regulation of protein targeting	2/263	78/18805	0.0256410256410256	1.83338208053037	0.878379236538777	0.297918410132078	0.533210842686147	0.466394469219606	STOM/ERBB2	2
GO:0002703	regulation of leukocyte mediated immunity	5/263	260/18805	0.0192307692307692	1.37503656039778	0.725223000340078	0.299500322446583	0.535751119685935	0.468616425429308	IL1R1/STXBP1/CADM1/HPX/TNF	5
GO:0045621	positive regulation of lymphocyte differentiation	3/263	137/18805	0.0218978102189781	1.56573506147484	0.791496847844632	0.300346006618422	0.536754692091113	0.469494240698177	SOCS1/ANXA1/RHOH	3
GO:0070374	positive regulation of ERK1 and ERK2 cascade	4/263	198/18805	0.0202020202020202	1.44448285132696	0.748814306923149	0.300550047620062	0.536754692091113	0.469494240698177	ERBB4/FGFR2/TNF/S100A7	4
GO:0071466	cellular response to xenobiotic stimulus	4/263	198/18805	0.0202020202020202	1.44448285132696	0.748814306923149	0.300550047620062	0.536754692091113	0.469494240698177	GSTP1/NAT1/CXCR4/CYP2J2	4
GO:0009410	response to xenobiotic stimulus	8/263	453/18805	0.0176600441501104	1.26272673096131	0.674118692712418	0.30146316724933	0.538093789862699	0.470665536824237	GSTP1/NAT1/ADD3/CXCR4/TNF/COL18A1/CYP2J2/BCAR3	8
GO:0031397	negative regulation of protein ubiquitination	2/263	79/18805	0.0253164556962025	1.81017471242239	0.859398174616624	0.303087812338613	0.538929958554581	0.471396925652086	BEX3/RPL23	2
GO:0140056	organelle localization by membrane tethering	2/263	79/18805	0.0253164556962025	1.81017471242239	0.859398174616624	0.303087812338613	0.538929958554581	0.471396925652086	STXBP1/RIMS2	2
GO:1901568	fatty acid derivative metabolic process	2/263	79/18805	0.0253164556962025	1.81017471242239	0.859398174616624	0.303087812338613	0.538929958554581	0.471396925652086	NUDT8/FASN	2
GO:0030324	lung development	4/263	199/18805	0.0201005025125628	1.43722414353134	0.738463225213326	0.303692392379564	0.538929958554581	0.471396925652086	PGR/FGFR1/FGFR2/TNF	4
GO:0046890	regulation of lipid biosynthetic process	4/263	199/18805	0.0201005025125628	1.43722414353134	0.738463225213326	0.303692392379564	0.538929958554581	0.471396925652086	ASAH1/SNAI1/TNF/NR3C1	4
GO:0048565	digestive tract development	3/263	138/18805	0.0217391304347826	1.55438915523227	0.778469698863483	0.304165659581342	0.538929958554581	0.471396925652086	FGFR2/TNF/CXCL8	3
GO:0051208	sequestering of calcium ion	3/263	138/18805	0.0217391304347826	1.55438915523227	0.778469698863483	0.304165659581342	0.538929958554581	0.471396925652086	CYBA/ITPR2/ANXA6	3
GO:0000470	maturation of LSU-rRNA	1/263	26/18805	0.0384615384615385	2.75007312079555	1.06348494115951	0.306801435357707	0.538929958554581	0.471396925652086	ZNHIT6	1
GO:0005980	glycogen catabolic process	1/263	26/18805	0.0384615384615385	2.75007312079555	1.06348494115951	0.306801435357707	0.538929958554581	0.471396925652086	PYGL	1
GO:0007039	protein catabolic process in the vacuole	1/263	26/18805	0.0384615384615385	2.75007312079555	1.06348494115951	0.306801435357707	0.538929958554581	0.471396925652086	ATP13A2	1
GO:0008045	motor neuron axon guidance	1/263	26/18805	0.0384615384615385	2.75007312079555	1.06348494115951	0.306801435357707	0.538929958554581	0.471396925652086	ERBB2	1
GO:0009435	NAD biosynthetic process	1/263	26/18805	0.0384615384615385	2.75007312079555	1.06348494115951	0.306801435357707	0.538929958554581	0.471396925652086	KYNU	1
GO:0032252	secretory granule localization	1/263	26/18805	0.0384615384615385	2.75007312079555	1.06348494115951	0.306801435357707	0.538929958554581	0.471396925652086	STXBP1	1
GO:0033598	mammary gland epithelial cell proliferation	1/263	26/18805	0.0384615384615385	2.75007312079555	1.06348494115951	0.306801435357707	0.538929958554581	0.471396925652086	MED1	1
GO:0033622	integrin activation	1/263	26/18805	0.0384615384615385	2.75007312079555	1.06348494115951	0.306801435357707	0.538929958554581	0.471396925652086	FN1	1
GO:0034138	toll-like receptor 3 signaling pathway	1/263	26/18805	0.0384615384615385	2.75007312079555	1.06348494115951	0.306801435357707	0.538929958554581	0.471396925652086	TNF	1
GO:0039694	viral RNA genome replication	1/263	26/18805	0.0384615384615385	2.75007312079555	1.06348494115951	0.306801435357707	0.538929958554581	0.471396925652086	CXCL8	1
GO:0043501	skeletal muscle adaptation	1/263	26/18805	0.0384615384615385	2.75007312079555	1.06348494115951	0.306801435357707	0.538929958554581	0.471396925652086	TNNT1	1
GO:0043931	ossification involved in bone maturation	1/263	26/18805	0.0384615384615385	2.75007312079555	1.06348494115951	0.306801435357707	0.538929958554581	0.471396925652086	LTF	1
GO:0045624	positive regulation of T-helper cell differentiation	1/263	26/18805	0.0384615384615385	2.75007312079555	1.06348494115951	0.306801435357707	0.538929958554581	0.471396925652086	ANXA1	1
GO:0046514	ceramide catabolic process	1/263	26/18805	0.0384615384615385	2.75007312079555	1.06348494115951	0.306801435357707	0.538929958554581	0.471396925652086	ASAH1	1
GO:0048143	astrocyte activation	1/263	26/18805	0.0384615384615385	2.75007312079555	1.06348494115951	0.306801435357707	0.538929958554581	0.471396925652086	TNF	1
GO:0048596	embryonic camera-type eye morphogenesis	1/263	26/18805	0.0384615384615385	2.75007312079555	1.06348494115951	0.306801435357707	0.538929958554581	0.471396925652086	FRS2	1
GO:0050927	positive regulation of positive chemotaxis	1/263	26/18805	0.0384615384615385	2.75007312079555	1.06348494115951	0.306801435357707	0.538929958554581	0.471396925652086	CXCL8	1
GO:0051446	positive regulation of meiotic cell cycle	1/263	26/18805	0.0384615384615385	2.75007312079555	1.06348494115951	0.306801435357707	0.538929958554581	0.471396925652086	OVOL1	1
GO:0090023	positive regulation of neutrophil chemotaxis	1/263	26/18805	0.0384615384615385	2.75007312079555	1.06348494115951	0.306801435357707	0.538929958554581	0.471396925652086	CXCL8	1
GO:0090103	cochlea morphogenesis	1/263	26/18805	0.0384615384615385	2.75007312079555	1.06348494115951	0.306801435357707	0.538929958554581	0.471396925652086	HPN	1
GO:1903523	negative regulation of blood circulation	1/263	26/18805	0.0384615384615385	2.75007312079555	1.06348494115951	0.306801435357707	0.538929958554581	0.471396925652086	TNF	1
GO:1904996	positive regulation of leukocyte adhesion to vascular endothelial cell	1/263	26/18805	0.0384615384615385	2.75007312079555	1.06348494115951	0.306801435357707	0.538929958554581	0.471396925652086	TNF	1
GO:0002706	regulation of lymphocyte mediated immunity	4/263	200/18805	0.02	1.43003802281369	0.7281682257927	0.306838422533655	0.538929958554581	0.471396925652086	IL1R1/CADM1/HPX/TNF	4
GO:0008360	regulation of cell shape	3/263	139/18805	0.0215827338129496	1.54320649943923	0.765546251184356	0.307987500179334	0.540258216287303	0.472558740098917	HPN/ANXA1/FN1	3
GO:0030048	actin filament-based movement	3/263	139/18805	0.0215827338129496	1.54320649943923	0.765546251184356	0.307987500179334	0.540258216287303	0.472558740098917	JUP/LIMCH1/STC1	3
GO:0006809	nitric oxide biosynthetic process	2/263	80/18805	0.025	1.78754752851711	0.840689378353508	0.308250514907475	0.540258216287303	0.472558740098917	KLF4/TNF	2
GO:0045685	regulation of glial cell differentiation	2/263	80/18805	0.025	1.78754752851711	0.840689378353508	0.308250514907475	0.540258216287303	0.472558740098917	TMEM98/CXCR4	2
GO:0000302	response to reactive oxygen species	4/263	201/18805	0.0199004975124378	1.42292340578476	0.717928660725285	0.309987898983382	0.542437667100501	0.474465085063868	GSTP1/NET1/SESN3/S100A7	4
GO:0009060	aerobic respiration	4/263	201/18805	0.0199004975124378	1.42292340578476	0.717928660725285	0.309987898983382	0.542437667100501	0.474465085063868	DNAJC15/AK4/TNF/COX6C	4
GO:0031396	regulation of protein ubiquitination	4/263	201/18805	0.0199004975124378	1.42292340578476	0.717928660725285	0.309987898983382	0.542437667100501	0.474465085063868	BEX3/SASH1/TSPYL5/RPL23	4
GO:0032388	positive regulation of intracellular transport	3/263	140/18805	0.0214285714285714	1.53218359587181	0.752724776654357	0.311811122241103	0.543459829342415	0.475359160686697	PCM1/JUP/SFN	3
GO:0045727	positive regulation of translation	3/263	140/18805	0.0214285714285714	1.53218359587181	0.752724776654357	0.311811122241103	0.543459829342415	0.475359160686697	SH3BGRL/ERBB2/TNF	3
GO:0055001	muscle cell development	4/263	202/18805	0.0198019801980198	1.4158792305086	0.707743892931161	0.313140584253498	0.543459829342415	0.475359160686697	KRT19/TNNT1/RGS2/RAMP2	4
GO:0002752	cell surface pattern recognition receptor signaling pathway	2/263	81/18805	0.0246913580246914	1.76547904051073	0.822244929798244	0.313405696478525	0.543459829342415	0.475359160686697	CYBA/LTF	2
GO:0014032	neural crest cell development	2/263	81/18805	0.0246913580246914	1.76547904051073	0.822244929798244	0.313405696478525	0.543459829342415	0.475359160686697	ERBB4/FN1	2
GO:0045921	positive regulation of exocytosis	2/263	81/18805	0.0246913580246914	1.76547904051073	0.822244929798244	0.313405696478525	0.543459829342415	0.475359160686697	ATP13A2/STXBP1	2
GO:0048644	muscle organ morphogenesis	2/263	81/18805	0.0246913580246914	1.76547904051073	0.822244929798244	0.313405696478525	0.543459829342415	0.475359160686697	MED1/FGFR2	2
GO:0090049	regulation of cell migration involved in sprouting angiogenesis	2/263	81/18805	0.0246913580246914	1.76547904051073	0.822244929798244	0.313405696478525	0.543459829342415	0.475359160686697	KLF4/ANXA1	2
GO:0140238	presynaptic endocytosis	2/263	81/18805	0.0246913580246914	1.76547904051073	0.822244929798244	0.313405696478525	0.543459829342415	0.475359160686697	MX1/SNCG	2
GO:1902807	negative regulation of cell cycle G1/S phase transition	2/263	81/18805	0.0246913580246914	1.76547904051073	0.822244929798244	0.313405696478525	0.543459829342415	0.475359160686697	KLF4/CDKN2B	2
GO:0001935	endothelial cell proliferation	4/263	203/18805	0.0197044334975369	1.40890445597408	0.697613295950283	0.316296242520156	0.543459829342415	0.475359160686697	EGFL7/ECM1/FGFR1/TNF	4
GO:1901605	alpha-amino acid metabolic process	4/263	203/18805	0.0197044334975369	1.40890445597408	0.697613295950283	0.316296242520156	0.543459829342415	0.475359160686697	QDPR/PLOD2/SLC39A8/KYNU	4
GO:0045089	positive regulation of innate immune response	7/263	395/18805	0.0177215189873418	1.26712229869567	0.639008307127306	0.316424529808737	0.543459829342415	0.475359160686697	MED1/CYBA/LTF/CADM1/HPX/TNF/S100A9	7
GO:0050863	regulation of T cell activation	7/263	395/18805	0.0177215189873418	1.26712229869567	0.639008307127306	0.316424529808737	0.543459829342415	0.475359160686697	LGALS1/ERBB2/SOCS1/ANXA1/ASCL2/RHOH/BATF	7
GO:0006929	substrate-dependent cell migration	1/263	27/18805	0.037037037037037	2.64821856076609	1.0207	0.31650968513144	0.543459829342415	0.475359160686697	FN1	1
GO:0006972	hyperosmotic response	1/263	27/18805	0.037037037037037	2.64821856076609	1.0207	0.31650968513144	0.543459829342415	0.475359160686697	EFHD1	1
GO:0009251	glucan catabolic process	1/263	27/18805	0.037037037037037	2.64821856076609	1.0207	0.31650968513144	0.543459829342415	0.475359160686697	PYGL	1
GO:0016188	synaptic vesicle maturation	1/263	27/18805	0.037037037037037	2.64821856076609	1.0207	0.31650968513144	0.543459829342415	0.475359160686697	STXBP1	1
GO:0016540	protein autoprocessing	1/263	27/18805	0.037037037037037	2.64821856076609	1.0207	0.31650968513144	0.543459829342415	0.475359160686697	TMPRSS2	1
GO:0030194	positive regulation of blood coagulation	1/263	27/18805	0.037037037037037	2.64821856076609	1.0207	0.31650968513144	0.543459829342415	0.475359160686697	PLAT	1
GO:0031048	regulatory ncRNA-mediated heterochromatin formation	1/263	27/18805	0.037037037037037	2.64821856076609	1.0207	0.31650968513144	0.543459829342415	0.475359160686697	XIST	1
GO:0032967	positive regulation of collagen biosynthetic process	1/263	27/18805	0.037037037037037	2.64821856076609	1.0207	0.31650968513144	0.543459829342415	0.475359160686697	CREB3L1	1
GO:0034377	plasma lipoprotein particle assembly	1/263	27/18805	0.037037037037037	2.64821856076609	1.0207	0.31650968513144	0.543459829342415	0.475359160686697	PRKACB	1
GO:0035313	wound healing, spreading of epidermal cells	1/263	27/18805	0.037037037037037	2.64821856076609	1.0207	0.31650968513144	0.543459829342415	0.475359160686697	PHLDB2	1
GO:0042730	fibrinolysis	1/263	27/18805	0.037037037037037	2.64821856076609	1.0207	0.31650968513144	0.543459829342415	0.475359160686697	PLAT	1
GO:0042983	amyloid precursor protein biosynthetic process	1/263	27/18805	0.037037037037037	2.64821856076609	1.0207	0.31650968513144	0.543459829342415	0.475359160686697	BACE2	1
GO:0042984	regulation of amyloid precursor protein biosynthetic process	1/263	27/18805	0.037037037037037	2.64821856076609	1.0207	0.31650968513144	0.543459829342415	0.475359160686697	BACE2	1
GO:0044827	modulation by host of viral genome replication	1/263	27/18805	0.037037037037037	2.64821856076609	1.0207	0.31650968513144	0.543459829342415	0.475359160686697	STOM	1
GO:0045662	negative regulation of myoblast differentiation	1/263	27/18805	0.037037037037037	2.64821856076609	1.0207	0.31650968513144	0.543459829342415	0.475359160686697	TNF	1
GO:0048714	positive regulation of oligodendrocyte differentiation	1/263	27/18805	0.037037037037037	2.64821856076609	1.0207	0.31650968513144	0.543459829342415	0.475359160686697	CXCR4	1
GO:0050926	regulation of positive chemotaxis	1/263	27/18805	0.037037037037037	2.64821856076609	1.0207	0.31650968513144	0.543459829342415	0.475359160686697	CXCL8	1
GO:0060396	growth hormone receptor signaling pathway	1/263	27/18805	0.037037037037037	2.64821856076609	1.0207	0.31650968513144	0.543459829342415	0.475359160686697	GDF15	1
GO:1900048	positive regulation of hemostasis	1/263	27/18805	0.037037037037037	2.64821856076609	1.0207	0.31650968513144	0.543459829342415	0.475359160686697	PLAT	1
GO:1901798	positive regulation of signal transduction by p53 class mediator	1/263	27/18805	0.037037037037037	2.64821856076609	1.0207	0.31650968513144	0.543459829342415	0.475359160686697	RPL23	1
GO:1903319	positive regulation of protein maturation	1/263	27/18805	0.037037037037037	2.64821856076609	1.0207	0.31650968513144	0.543459829342415	0.475359160686697	HPN	1
GO:1905564	positive regulation of vascular endothelial cell proliferation	1/263	27/18805	0.037037037037037	2.64821856076609	1.0207	0.31650968513144	0.543459829342415	0.475359160686697	FGFR1	1
GO:0042246	tissue regeneration	2/263	82/18805	0.024390243902439	1.74394880830938	0.804057240533813	0.318552559799031	0.545952354176504	0.477539348529756	ANXA1/ERBB4	2
GO:0072028	nephron morphogenesis	2/263	82/18805	0.024390243902439	1.74394880830938	0.804057240533813	0.318552559799031	0.545952354176504	0.477539348529756	ERBB4/TACSTD2	2
GO:1903556	negative regulation of tumor necrosis factor superfamily cytokine production	2/263	82/18805	0.024390243902439	1.74394880830938	0.804057240533813	0.318552559799031	0.545952354176504	0.477539348529756	GSTP1/LTF	2
GO:0110053	regulation of actin filament organization	5/263	267/18805	0.0187265917602996	1.3389869127469	0.664403376150129	0.31862409016128	0.545952354176504	0.477539348529756	EVL/ADD3/LIMCH1/TACSTD2/PHLDB2	5
GO:0051650	establishment of vesicle localization	4/263	204/18805	0.0196078431372549	1.40199806158205	0.68753625371258	0.319454639637621	0.547090975886674	0.478535290145424	STARD3/ATP13A2/MX1/STXBP1	4
GO:0042593	glucose homeostasis	5/263	268/18805	0.0186567164179104	1.33399069292322	0.655853354219777	0.321369154324117	0.547625776498258	0.479003075170427	SESN3/PYGL/BACE2/EFNA5/PRCP	5
GO:1902806	regulation of cell cycle G1/S phase transition	4/263	205/18805	0.0195121951219512	1.3951590466475	0.677512160314158	0.322615543164025	0.547625776498258	0.479003075170427	KLF4/ANXA1/CDC6/CDKN2B	4
GO:0034763	negative regulation of transmembrane transport	3/263	143/18805	0.020979020979021	1.5000398840703	0.714855526681632	0.32328869435943	0.547625776498258	0.479003075170427	RGS2/TNF/SLC43A1	3
GO:0060972	left/right pattern formation	3/263	143/18805	0.020979020979021	1.5000398840703	0.714855526681632	0.32328869435943	0.547625776498258	0.479003075170427	SNAI1/MESP1/NEK8	3
GO:0006446	regulation of translational initiation	2/263	83/18805	0.0240963855421687	1.72293737688396	0.786119034043069	0.323690331214461	0.547625776498258	0.479003075170427	SH3BGRL/TNF	2
GO:0042267	natural killer cell mediated cytotoxicity	2/263	83/18805	0.0240963855421687	1.72293737688396	0.786119034043069	0.323690331214461	0.547625776498258	0.479003075170427	CADM1/RNF19B	2
GO:0060390	regulation of SMAD protein signal transduction	2/263	83/18805	0.0240963855421687	1.72293737688396	0.786119034043069	0.323690331214461	0.547625776498258	0.479003075170427	LDLRAD4/GDF15	2
GO:0032886	regulation of microtubule-based process	5/263	269/18805	0.0185873605947955	1.32903161971532	0.647337061559119	0.324117025383618	0.547625776498258	0.479003075170427	ERBB2/TRIM36/NEFH/EFNA5/PHLDB2	5
GO:0033500	carbohydrate homeostasis	5/263	269/18805	0.0185873605947955	1.32903161971532	0.647337061559119	0.324117025383618	0.547625776498258	0.479003075170427	SESN3/PYGL/BACE2/EFNA5/PRCP	5
GO:0090101	negative regulation of transmembrane receptor protein serine/threonine kinase signaling pathway	4/263	206/18805	0.0194174757281553	1.3883864299162	0.667540419799403	0.32577872238617	0.547625776498258	0.479003075170427	LDLRAD4/GDF15/SPART/CHRD	4
GO:0001964	startle response	1/263	28/18805	0.0357142857142857	2.55363932645301	0.979807648832935	0.32608248057347	0.547625776498258	0.479003075170427	SLITRK6	1
GO:0002070	epithelial cell maturation	1/263	28/18805	0.0357142857142857	2.55363932645301	0.979807648832935	0.32608248057347	0.547625776498258	0.479003075170427	PGR	1
GO:0002227	innate immune response in mucosa	1/263	28/18805	0.0357142857142857	2.55363932645301	0.979807648832935	0.32608248057347	0.547625776498258	0.479003075170427	LTF	1
GO:0002726	positive regulation of T cell cytokine production	1/263	28/18805	0.0357142857142857	2.55363932645301	0.979807648832935	0.32608248057347	0.547625776498258	0.479003075170427	IL1R1	1
GO:0003209	cardiac atrium morphogenesis	1/263	28/18805	0.0357142857142857	2.55363932645301	0.979807648832935	0.32608248057347	0.547625776498258	0.479003075170427	MESP1	1
GO:0007097	nuclear migration	1/263	28/18805	0.0357142857142857	2.55363932645301	0.979807648832935	0.32608248057347	0.547625776498258	0.479003075170427	PCM1	1
GO:0010714	positive regulation of collagen metabolic process	1/263	28/18805	0.0357142857142857	2.55363932645301	0.979807648832935	0.32608248057347	0.547625776498258	0.479003075170427	CREB3L1	1
GO:0010818	T cell chemotaxis	1/263	28/18805	0.0357142857142857	2.55363932645301	0.979807648832935	0.32608248057347	0.547625776498258	0.479003075170427	S100A7	1
GO:0019359	nicotinamide nucleotide biosynthetic process	1/263	28/18805	0.0357142857142857	2.55363932645301	0.979807648832935	0.32608248057347	0.547625776498258	0.479003075170427	KYNU	1
GO:0019363	pyridine nucleotide biosynthetic process	1/263	28/18805	0.0357142857142857	2.55363932645301	0.979807648832935	0.32608248057347	0.547625776498258	0.479003075170427	KYNU	1
GO:0021801	cerebral cortex radial glia-guided migration	1/263	28/18805	0.0357142857142857	2.55363932645301	0.979807648832935	0.32608248057347	0.547625776498258	0.479003075170427	SOCS7	1
GO:0022030	telencephalon glial cell migration	1/263	28/18805	0.0357142857142857	2.55363932645301	0.979807648832935	0.32608248057347	0.547625776498258	0.479003075170427	SOCS7	1
GO:0030325	adrenal gland development	1/263	28/18805	0.0357142857142857	2.55363932645301	0.979807648832935	0.32608248057347	0.547625776498258	0.479003075170427	NR3C1	1
GO:0033081	regulation of T cell differentiation in thymus	1/263	28/18805	0.0357142857142857	2.55363932645301	0.979807648832935	0.32608248057347	0.547625776498258	0.479003075170427	ERBB2	1
GO:0034698	response to gonadotropin	1/263	28/18805	0.0357142857142857	2.55363932645301	0.979807648832935	0.32608248057347	0.547625776498258	0.479003075170427	EFNA5	1
GO:0035116	embryonic hindlimb morphogenesis	1/263	28/18805	0.0357142857142857	2.55363932645301	0.979807648832935	0.32608248057347	0.547625776498258	0.479003075170427	MED1	1
GO:0035357	peroxisome proliferator activated receptor signaling pathway	1/263	28/18805	0.0357142857142857	2.55363932645301	0.979807648832935	0.32608248057347	0.547625776498258	0.479003075170427	MED1	1
GO:0036037	CD8-positive, alpha-beta T cell activation	1/263	28/18805	0.0357142857142857	2.55363932645301	0.979807648832935	0.32608248057347	0.547625776498258	0.479003075170427	SOCS1	1
GO:0043304	regulation of mast cell degranulation	1/263	28/18805	0.0357142857142857	2.55363932645301	0.979807648832935	0.32608248057347	0.547625776498258	0.479003075170427	STXBP1	1
GO:0046949	fatty-acyl-CoA biosynthetic process	1/263	28/18805	0.0357142857142857	2.55363932645301	0.979807648832935	0.32608248057347	0.547625776498258	0.479003075170427	FASN	1
GO:0050995	negative regulation of lipid catabolic process	1/263	28/18805	0.0357142857142857	2.55363932645301	0.979807648832935	0.32608248057347	0.547625776498258	0.479003075170427	TNF	1
GO:0055022	negative regulation of cardiac muscle tissue growth	1/263	28/18805	0.0357142857142857	2.55363932645301	0.979807648832935	0.32608248057347	0.547625776498258	0.479003075170427	RGS2	1
GO:0060586	multicellular organismal-level iron ion homeostasis	1/263	28/18805	0.0357142857142857	2.55363932645301	0.979807648832935	0.32608248057347	0.547625776498258	0.479003075170427	CYBRD1	1
GO:0061117	negative regulation of heart growth	1/263	28/18805	0.0357142857142857	2.55363932645301	0.979807648832935	0.32608248057347	0.547625776498258	0.479003075170427	RGS2	1
GO:0071378	cellular response to growth hormone stimulus	1/263	28/18805	0.0357142857142857	2.55363932645301	0.979807648832935	0.32608248057347	0.547625776498258	0.479003075170427	GDF15	1
GO:1902894	negative regulation of miRNA transcription	1/263	28/18805	0.0357142857142857	2.55363932645301	0.979807648832935	0.32608248057347	0.547625776498258	0.479003075170427	TNF	1
GO:1902993	positive regulation of amyloid precursor protein catabolic process	1/263	28/18805	0.0357142857142857	2.55363932645301	0.979807648832935	0.32608248057347	0.547625776498258	0.479003075170427	TNF	1
GO:1903019	negative regulation of glycoprotein metabolic process	1/263	28/18805	0.0357142857142857	2.55363932645301	0.979807648832935	0.32608248057347	0.547625776498258	0.479003075170427	BACE2	1
GO:0031623	receptor internalization	3/263	144/18805	0.0208333333333333	1.48962294043093	0.702425476041876	0.327115485779853	0.549080756823543	0.480275732667634	MX1/RAMP2/CXCL8	3
GO:0001570	vasculogenesis	2/263	84/18805	0.0238095238095238	1.70242621763534	0.768423329220572	0.328818260168738	0.55074710863389	0.481733274799007	EGFL7/RAMP2	2
GO:0008344	adult locomotory behavior	2/263	84/18805	0.0238095238095238	1.70242621763534	0.768423329220572	0.328818260168738	0.55074710863389	0.481733274799007	SLITRK6/SNCG	2
GO:0030593	neutrophil chemotaxis	2/263	84/18805	0.0238095238095238	1.70242621763534	0.768423329220572	0.328818260168738	0.55074710863389	0.481733274799007	CXCL8/S100A9	2
GO:0097009	energy homeostasis	2/263	84/18805	0.0238095238095238	1.70242621763534	0.768423329220572	0.328818260168738	0.55074710863389	0.481733274799007	GDF15/PRCP	2
GO:0050728	negative regulation of inflammatory response	4/263	207/18805	0.0193236714975845	1.38167924909535	0.657620445948804	0.328943948343398	0.55074710863389	0.481733274799007	GSTP1/KLF4/SLC39A8/SOCS3	4
GO:0031333	negative regulation of protein-containing complex assembly	3/263	145/18805	0.0206896551724138	1.47934967877278	0.690089356567941	0.330942106790878	0.552219788370178	0.483021413803226	DNAJC15/ADD3/STXBP1	3
GO:0007188	adenylate cyclase-modulating G protein-coupled receptor signaling pathway	5/263	272/18805	0.0183823529411765	1.31437318273317	0.621987688163322	0.33237594199907	0.552219788370178	0.483021413803226	PRKACB/NPY1R/RGS2/RAMP2/RIMS2	5
GO:0006970	response to osmotic stress	2/263	85/18805	0.0235294117647059	1.68239767389846	0.750963424943287	0.333935618713752	0.552219788370178	0.483021413803226	EFHD1/TNF	2
GO:0007193	adenylate cyclase-inhibiting G protein-coupled receptor signaling pathway	2/263	85/18805	0.0235294117647059	1.68239767389846	0.750963424943287	0.333935618713752	0.552219788370178	0.483021413803226	NPY1R/RGS2	2
GO:0035050	embryonic heart tube development	2/263	85/18805	0.0235294117647059	1.68239767389846	0.750963424943287	0.333935618713752	0.552219788370178	0.483021413803226	MED1/MESP1	2
GO:0043242	negative regulation of protein-containing complex disassembly	2/263	85/18805	0.0235294117647059	1.68239767389846	0.750963424943287	0.333935618713752	0.552219788370178	0.483021413803226	ADD3/TNF	2
GO:0086003	cardiac muscle cell contraction	2/263	85/18805	0.0235294117647059	1.68239767389846	0.750963424943287	0.333935618713752	0.552219788370178	0.483021413803226	JUP/STC1	2
GO:0015711	organic anion transport	8/263	469/18805	0.0170575692963753	1.2196486335298	0.573703281695304	0.33460574562088	0.552219788370178	0.483021413803226	SLC37A1/CRABP1/SLC39A8/STXBP1/ANXA1/RGS2/TNF/SLC43A1	8
GO:0006986	response to unfolded protein	3/263	146/18805	0.0205479452054795	1.46921714672639	0.677845671209027	0.334768182858535	0.552219788370178	0.483021413803226	HSPB8/CREB3L1/STC2	3
GO:1900180	regulation of protein localization to nucleus	3/263	146/18805	0.0205479452054795	1.46921714672639	0.677845671209027	0.334768182858535	0.552219788370178	0.483021413803226	TMEM98/ATP13A2/JUP	3
GO:0071216	cellular response to biotic stimulus	5/263	273/18805	0.0183150183150183	1.30955862895026	0.613603459310815	0.335133506296111	0.552219788370178	0.483021413803226	GSTP1/LTF/SASH1/TNF/CXCL8	5
GO:1901988	negative regulation of cell cycle phase transition	5/263	273/18805	0.0183150183150183	1.30955862895026	0.613603459310815	0.335133506296111	0.552219788370178	0.483021413803226	KLF4/OVOL1/TEX14/CDC6/CDKN2B	5
GO:0000272	polysaccharide catabolic process	1/263	29/18805	0.0344827586206897	2.46558279795463	0.940659674913097	0.335521704496843	0.552219788370178	0.483021413803226	PYGL	1
GO:0003094	glomerular filtration	1/263	29/18805	0.0344827586206897	2.46558279795463	0.940659674913097	0.335521704496843	0.552219788370178	0.483021413803226	SULF2	1
GO:0006833	water transport	1/263	29/18805	0.0344827586206897	2.46558279795463	0.940659674913097	0.335521704496843	0.552219788370178	0.483021413803226	MLLT6	1
GO:0010039	response to iron ion	1/263	29/18805	0.0344827586206897	2.46558279795463	0.940659674913097	0.335521704496843	0.552219788370178	0.483021413803226	CYBRD1	1
GO:0010758	regulation of macrophage chemotaxis	1/263	29/18805	0.0344827586206897	2.46558279795463	0.940659674913097	0.335521704496843	0.552219788370178	0.483021413803226	MTUS1	1
GO:0014046	dopamine secretion	1/263	29/18805	0.0344827586206897	2.46558279795463	0.940659674913097	0.335521704496843	0.552219788370178	0.483021413803226	SNCG	1
GO:0031952	regulation of protein autophosphorylation	1/263	29/18805	0.0344827586206897	2.46558279795463	0.940659674913097	0.335521704496843	0.552219788370178	0.483021413803226	NEK10	1
GO:0042634	regulation of hair cycle	1/263	29/18805	0.0344827586206897	2.46558279795463	0.940659674913097	0.335521704496843	0.552219788370178	0.483021413803226	TNF	1
GO:0042832	defense response to protozoan	1/263	29/18805	0.0344827586206897	2.46558279795463	0.940659674913097	0.335521704496843	0.552219788370178	0.483021413803226	BATF	1
GO:0045686	negative regulation of glial cell differentiation	1/263	29/18805	0.0344827586206897	2.46558279795463	0.940659674913097	0.335521704496843	0.552219788370178	0.483021413803226	TMEM98	1
GO:0045954	positive regulation of natural killer cell mediated cytotoxicity	1/263	29/18805	0.0344827586206897	2.46558279795463	0.940659674913097	0.335521704496843	0.552219788370178	0.483021413803226	CADM1	1
GO:0060142	regulation of syncytium formation by plasma membrane fusion	1/263	29/18805	0.0344827586206897	2.46558279795463	0.940659674913097	0.335521704496843	0.552219788370178	0.483021413803226	GDF15	1
GO:0061744	motor behavior	1/263	29/18805	0.0344827586206897	2.46558279795463	0.940659674913097	0.335521704496843	0.552219788370178	0.483021413803226	NR3C1	1
GO:0070977	bone maturation	1/263	29/18805	0.0344827586206897	2.46558279795463	0.940659674913097	0.335521704496843	0.552219788370178	0.483021413803226	LTF	1
GO:0071480	cellular response to gamma radiation	1/263	29/18805	0.0344827586206897	2.46558279795463	0.940659674913097	0.335521704496843	0.552219788370178	0.483021413803226	TSPYL5	1
GO:0090594	inflammatory response to wounding	1/263	29/18805	0.0344827586206897	2.46558279795463	0.940659674913097	0.335521704496843	0.552219788370178	0.483021413803226	TNF	1
GO:0097107	postsynaptic density assembly	1/263	29/18805	0.0344827586206897	2.46558279795463	0.940659674913097	0.335521704496843	0.552219788370178	0.483021413803226	FGFR1	1
GO:0098901	regulation of cardiac muscle cell action potential	1/263	29/18805	0.0344827586206897	2.46558279795463	0.940659674913097	0.335521704496843	0.552219788370178	0.483021413803226	JUP	1
[truncated: 1,297 more rows]
