# Supplementary material
Source: Research Square preprint supplement (doi:10.21203/rs.3.rs-9551458/v1)
Supplement: Supplementary file 7 [file f500126c9842acb7f05258cb.xlsx]

## Sheet: celltype_marker_enrich_top3
Top 3 biological processes (BP) with significant differences among different types of cell sources
	group	Description	pvalue	ratio	geneID	celltype_group
Malignantcells.GO:0048193	C1	Golgi vesicle transport	3.21071697978354e-14	5.09259259259259	NAPA/RABEP1/LAMP1/ERGIC1/COPB2/INSIG1/GOLPH3/KDELR3/KDELR1/COPB1/STEAP2/COPZ1/COG5/TFG/ARF4/COPG1/TMED2/COPA/SNX2/GOLPH3L/SNX1/SAR1B/RAB1A/ARCN1/SCAMP1/GOLGA5/VAPA/KIF16B/ANK3/RACK1/KRT18/MACF1/WIPI1/SEC22C/COPE/SNAP23/ARF5/RAB8A/PREPL/VCP/SPTBN1/ATP2C1/COG2/STX5/BET1/RAB31/RAB6A/ARFGAP2/ASAP1/GOLGA7/RNF139/VTI1B/SEC23IP/SCYL1/GOLT1B	Malignantcells_BM
Malignantcells.GO:0006091	C1	generation of precursor metabolites and energy	4.98602439881227e-11	6.11111111111111	DNAJC15/IL6ST/ATP5F1D/PYGL/ENPP1/NDUFB6/PFKFB3/COX7A2L/ATP5F1C/CAT/ACADVL/NDUFV1/ACAT1/LDHA/UCP2/NDUFS7/UQCRFS1/UQCRC2/SUCLG2/PPIF/IDH1/CHCHD10/PDHB/NNT/FH/STOML2/RHOA/ATP5F1B/PTGES3/SLC25A4/PDIA5/NDUFA2/GYG1/SUCLA2/NDUFB4/COX6C/UQCRQ/MT-CO3/FBP1/ATP5F1A/WIPI1/MDH2/NDUFS8/ETFRF1/VCP/NOP53/NDUFA8/OGT/GFPT1/PGLS/UQCRHL/HK1/CHCHD5/CYC1/GAA/LIPA/CS/PPP1CC/PUM2/GNPDA1/PPP1R2/CROT/DLD/POR/PGAM1/GSK3A	Malignantcells_BM
Malignantcells.GO:0015980	C1	energy derivation by oxidation of organic compounds	9.88489388590142e-10	4.72222222222222	DNAJC15/IL6ST/ATP5F1D/PYGL/ENPP1/NDUFB6/COX7A2L/ATP5F1C/CAT/ACADVL/NDUFV1/NDUFS7/UQCRFS1/UQCRC2/SUCLG2/PPIF/IDH1/CHCHD10/PDHB/NNT/FH/STOML2/RHOA/ATP5F1B/PTGES3/NDUFA2/GYG1/SUCLA2/NDUFB4/COX6C/UQCRQ/MT-CO3/ATP5F1A/WIPI1/MDH2/NDUFS8/ETFRF1/VCP/NOP53/NDUFA8/GFPT1/UQCRHL/CHCHD5/CYC1/GAA/CS/PPP1CC/PUM2/PPP1R2/DLD/GSK3A	Malignantcells_BM
Malignantcells.GO:0097193	C2	intrinsic apoptotic signaling pathway	3.82234560846456e-11	4.72370766488414	MCL1/WWOX/DDX3X/SYVN1/PMAIP1/MYC/CEBPB/SNAI1/SIVA1/AKT1/USP15/SFN/ENO1/NOC2L/HERPUD1/HDAC1/NONO/IER3/PRKDC/BCAP31/SIAH1/CYLD/PYCARD/MDM2/TRAP1/BAG6/CDKN1A/HYOU1/HIPK1/HSPA1A/ERN1/PPP1R13B/PTTG1IP/APP/DDX5/PPIA/IVNS1ABP/PYCR1/DDIT3/AIFM1/TP53BP2/CUL3/ERO1A/KDM1A/MSH2/ATF2/STK25/BCL2L11/PINK1/RRN3/GSKIP/TAF9B/BNIP3	Malignantcells_PT
Malignantcells.GO:0006913	C2	nucleocytoplasmic transport	1.19509848621283e-10	4.72370766488414	HNRNPA2B1/MED1/JUP/AKT1/BAG3/SFN/AHCYL1/SUPT6H/CDH1/CPSF6/NFKBIA/PPP1R10/ADAR/NUP107/IER3/XPOT/SDAD1/CHTOP/SRSF3/MBTPS1/KPNA2/MDM2/NXF1/NUP54/CDKN1A/ZC3H12A/AKIRIN2/AGFG1/NUP93/PTTG1IP/RPL23/ALYREF/EMD/NUTF2/NUP98/CALR/FMR1/UHMK1/NMD3/MAPK14/SIRT7/RBM15B/PPP3CA/SEH1L/NXT1/NUP153/EIF4A3/ALKBH5/ATF2/HTATIP2/NUP58/CHP1/NUP214	Malignantcells_PT
Malignantcells.GO:0051169	C2	nuclear transport	1.19509848621283e-10	4.72370766488414	HNRNPA2B1/MED1/JUP/AKT1/BAG3/SFN/AHCYL1/SUPT6H/CDH1/CPSF6/NFKBIA/PPP1R10/ADAR/NUP107/IER3/XPOT/SDAD1/CHTOP/SRSF3/MBTPS1/KPNA2/MDM2/NXF1/NUP54/CDKN1A/ZC3H12A/AKIRIN2/AGFG1/NUP93/PTTG1IP/RPL23/ALYREF/EMD/NUTF2/NUP98/CALR/FMR1/UHMK1/NMD3/MAPK14/SIRT7/RBM15B/PPP3CA/SEH1L/NXT1/NUP153/EIF4A3/ALKBH5/ATF2/HTATIP2/NUP58/CHP1/NUP214	Malignantcells_PT
Malignantcells.GO:0008380	C3	RNA splicing	1.28400280511215e-20	10.4347826086957	RPS26/SNRPD3/HNRNPA1/LARP7/SNRNP27/CASC3/RBM25/USP22/PRPF40A/NSRP1/THOC2/ZC3H13/SRRM1/SRSF11/PABPC1/SON/NCL/PRPF6/HNRNPR/YTHDC1/HNRNPA3/YBX1/SNRPD2/CDK11B/SYF2/THRAP3/RBM8A/REST/SFSWAP/MPHOSPH10/PRKRIP1/RBMX/SNRPE/SCAF11/LUC7L3/IK/HNRNPM/PNN/ACIN1/PIK3R1/CIR1/PPIG/SREK1/ZNF638/ZRANB2/RSRC1/SF3A1/SNRPG/HTATSF1/RBMX2/PRPF4/PPP4R2/PRPF38B/SREK1IP1/FRG1/SRSF4/DDX46/VIRMA/ZMAT2/IWS1	Malignantcells_LyM
Malignantcells.GO:0002181	C3	cytoplasmic translation	1.77871328124059e-20	6.26086956521739	RPS26/RPL21/RPL22/RPL26/RPL7/RPL9/RPS10/EIF3A/RPL18A/EIF2S2/RPL41/EIF3J/RPS28/RPL6/RPS3A/RPL13A/PABPC1/RPL39/RPL36/RPL27A/RPS19/RPS15A/RPL3/RPS27/RPS15/RPL31/HNRNPD/RPS16/YBX1/ZC3H15/RPSA/DENR/DHX36/EIF4G1/RWDD1/YTHDF2	Malignantcells_LyM
Malignantcells.GO:0022613	C3	ribonucleoprotein complex biogenesis	1.61863295999258e-15	9.21739130434783	RPL26/RPL7/SNRPD3/EIF6/MPHOSPH6/EIF5B/EIF3A/EIF2S2/NOL8/EIF3J/NOP58/RPS28/RPS3A/RPL13A/HSP90AA1/RPS19/HSP90AB1/RPS15A/RPS27/RPS15/PRPF6/RPS16/YTHDC1/PA2G4/XRCC5/DDX18/SNRPD2/RPSA/ISG20/DENR/SFSWAP/MPHOSPH10/SNRPE/SCAF11/DDX27/LUC7L3/DDX21/NVL/EIF1AX/YTHDF2/SF3A1/SNRPG/GNL2/HTATSF1/LSG1/RBMX2/FRG1/DDX46/DKC1/PWP1/DDX52/NOLC1/USP16	Malignantcells_LyM
MPs.GO:0042060	C1	wound healing	2.20625504870298e-13	10.7936507936508	TNF/ACTB/RHOA/ACTG1/AHNAK/VEGFB/HMOX1/F13A1/TGFBR1/PRCP/PLAU/ARL8B/RHOC/CD44/CORO1B/B4GALT1/PRKCD/CD40/MYH9/LYN/JAK2/EMILIN2/ALOX5/FERMT3/FN1/TGFB1/ADAM17/CLEC7A/PLEK/ENG/SH2B3/DST/GNAQ/FLNA	MPs_BM
MPs.GO:1903039	C1	positive regulation of leukocyte cell-cell adhesion	1.57656373475942e-11	7.93650793650794	HLA-DQA1/AMBRA1/TNF/ACTB/CD81/RHOA/HLA-DRB1/CD83/TGFBR2/BCL6/HLA-DOA/CSK/CD4/ITGA4/CD44/RUNX1/LYN/HAVCR2/CORO1A/SIRPA/JAK2/ALOX5/TGFB1/CCL2/DOCK8	MPs_BM
MPs.GO:0022409	C1	positive regulation of cell-cell adhesion	1.06980705415729e-10	8.25396825396825	HLA-DQA1/AMBRA1/TNF/ACTB/CD81/RHOA/HLA-DRB1/CD83/TGFBR2/BCL6/HLA-DOA/CSK/CD4/ITGA4/CD44/RUNX1/LYN/HAVCR2/CORO1A/SIRPA/JAK2/EMILIN2/ALOX5/TGFB1/CCL2/DOCK8	MPs_BM
MPs.GO:0002237	C2	response to molecule of bacterial origin	3.00025464612296e-13	12.5628140703518	TNFAIP3/ZFP36/FOS/CXCL2/CXCL8/CEBPB/NFKBIA/NR4A1/XBP1/SERPINE1/IL1B/IL1A/NFKB1/ADM/PELI1/PTGS2/ZC3H12A/DUSP10/FCGR2B/PDE4B/ACP5/C5AR1/PTGER4/HNRNPA0/CD55	MPs_PT
MPs.GO:0050867	C2	positive regulation of cell activation	4.54309619391816e-12	12.0603015075377	AMBRA1/CD81/CD83/TGFB1/FLNA/HLA-DRB5/HLA-DQA2/SOX4/XBP1/BRD2/MMP14/NR4A3/CCL3/IL1B/HSPH1/IL1A/PELI1/CDKN1A/ANXA1/DUSP10/MAP3K8/TFRC/CD55/ZBTB1	MPs_PT
MPs.GO:0002696	C2	positive regulation of leukocyte activation	1.07164528347438e-11	11.5577889447236	AMBRA1/CD81/CD83/TGFB1/HLA-DRB5/HLA-DQA2/SOX4/XBP1/BRD2/MMP14/NR4A3/CCL3/IL1B/HSPH1/IL1A/PELI1/CDKN1A/ANXA1/DUSP10/MAP3K8/TFRC/CD55/ZBTB1	MPs_PT
MPs.GO:0002181	C3	cytoplasmic translation	8.31076829759056e-30	11.6504854368932	RPL21/RPL9/RPS26/RPL26/RPL22/RPL7/RPS27/PABPC1/RPL23/RPS16/RPL39/RPS28/RPL13A/RPL18A/RPS3A/RPL27A/RPL6/RPS15/EIF2S2/EIF3A/RPS19/RPL31/RPL12/FAU/RPL37/RPS29/RPL14/EIF3J/RPS15A/RPL41/HNRNPD/RPL35/RPL24/RPL3/ZC3H15/SH3BGRL	MPs_LyM
MPs.GO:0006119	C3	oxidative phosphorylation	4.34645904123536e-17	7.76699029126214	ATP5MG/ATP5MF/UQCR11/COX8A/COX6A1/ATP5PO/MT-ATP8/NDUFA11/NDUFA13/ATP5F1E/UQCRB/COX7C/NDUFA1/COX6C/NDUFA4/UQCR10/NDUFA3/ATP5ME/NDUFB2/COX6B1/COX7A2/NDUFA10/COX5B/NDUFB10	MPs_LyM
MPs.GO:0009060	C3	aerobic respiration	3.75878560216473e-16	8.41423948220065	ATP5MG/ATP5MF/UQCR11/COX8A/COX6A1/ATP5PO/MT-ATP8/NDUFA11/BLOC1S1/NDUFA13/ATP5F1E/UQCRB/COX7C/NDUFA1/SUCLG1/COX6C/NDUFA4/UQCR10/NDUFA3/ATP5ME/NDUFB2/COX6B1/COX7A2/NDUFA10/COX5B/NDUFB10	MPs_LyM
MuralCells.GO:0006986	C1	response to unfolded protein	1.28202493798563e-11	10.5691056910569	HSPB1/HSPA1A/DNAJB1/HSPA8/PPP1R15A/ATF3/BAG3/HSP90AA1/SERPINH1/HSP90AB1/HSPB8/THBS1/ATF4	MuralCells_BM
MuralCells.GO:0035966	C1	response to topologically incorrect protein	5.6037667069473e-11	10.5691056910569	HSPB1/HSPA1A/DNAJB1/HSPA8/PPP1R15A/ATF3/BAG3/HSP90AA1/SERPINH1/HSP90AB1/HSPB8/THBS1/ATF4	MuralCells_BM
MuralCells.GO:0002428	C1	antigen processing and presentation of peptide antigen via MHC class Ib	4.54868365564167e-08	4.0650406504065	B2M/HLA-C/HLA-A/HLA-F/HLA-B	MuralCells_BM
MuralCells.GO:0002181...4	C2	cytoplasmic translation	2.38113994353595e-09	26.9230769230769	RPS29/RPL37A/RPL37/RPL34/RPS21/RPS28/RPL38	MuralCells_PT
MuralCells.GO:0140467	C2	integrated stress response signaling	4.67555591390201e-05	11.5384615384615	AGR2/CEBPB/CEBPD	MuralCells_PT
MuralCells.GO:0048711	C2	positive regulation of astrocyte differentiation	0.000142042699786825	7.69230769230769	HES1/ID2	MuralCells_PT
MuralCells.GO:0002181...7	C3	cytoplasmic translation	4.61811644817622e-24	9.2436974789916	RPL37/RPS28/RPL21/RPL26/RPL22/RPS26/RPL7/RPL9/RPS27/RPS10/RPL18A/RPL39/PABPC1/RPL23/RPS3A/EIF3A/RPL41/RPL13A/EIF2S2/RPS16/RPL27A/RPS15A/RPS15/EIF3J/RPL31/RPL6/HNRNPD/RPL3/DHX36/RPL12/RPL35/ZC3H15/RWDD1	MuralCells_LyM
MuralCells.GO:0006119	C3	oxidative phosphorylation	4.63362216328275e-21	8.12324929971989	UQCR11/ATP5MG/ATP5MF/COX6A1/COX8A/ATP5PO/NDUFA11/NDUFA13/NDUFC2/NDUFB8/MT-ATP8/ATP5ME/ATP5F1E/NDUFA3/NDUFB2/NDUFA1/UQCRQ/UQCRB/NDUFA6/COX7C/DNAJC15/NDUFA10/NDUFS5/NDUFB1/NDUFA4/COX4I2/NDUFS6/COX5B/ATP5IF1	MuralCells_LyM
MuralCells.GO:0009060	C3	aerobic respiration	1.68505637708841e-19	8.68347338935574	UQCR11/ATP5MG/ATP5MF/COX6A1/COX8A/ATP5PO/NDUFA11/NDUFA13/BLOC1S1/NDUFC2/NDUFB8/MT-ATP8/SUCLG1/ATP5ME/ATP5F1E/NDUFA3/NDUFB2/NDUFA1/UQCRQ/UQCRB/NDUFA6/COX7C/DNAJC15/NDUFA10/NDUFS5/NDUFB1/NDUFA4/COX4I2/NDUFS6/COX5B/ATP5IF1	MuralCells_LyM
TandNK.GO:1903039	C1	positive regulation of leukocyte cell-cell adhesion	3.71953871845286e-14	23.0769230769231	HLA-A/ACTB/CD74/HLA-DRB1/HLA-DRA/HLA-DPB1/HLA-DPA1/LGALS1/HSPD1/RHOA/ICOS/CORO1A/HSPH1/ITGA4/SKAP1	TandNK_BM
TandNK.GO:0001906	C1	cell killing	2.50286694281946e-13	21.5384615384615	HLA-A/HLA-DRB1/HLA-C/HLA-DRA/GAPDH/TIGIT/GBP5/HLA-F/GBP2/TUBB/CORO1A/PRDX1/CTSC/LYST	TandNK_BM
TandNK.GO:1903037	C1	regulation of leukocyte cell-cell adhesion	2.69253464020207e-13	24.6153846153846	HLA-A/ACTB/CD74/HLA-DRB1/HLA-DRA/HLA-DPB1/HLA-DPA1/LGALS1/TIGIT/HSPD1/RHOA/ICOS/CORO1A/HSPH1/ITGA4/SKAP1	TandNK_BM
TandNK.GO:0002181	C2	cytoplasmic translation	1.28015828959571e-16	17.5824175824176	RPS29/RPL19/RPL23/RPL37A/RPL23A/RPLP2/RPL13/RPL34/RPL38/RPL30/RPS21/RPL31/RPL27A/RPS3/RPL11/RPS12	TandNK_PT
TandNK.GO:0045619	C2	regulation of lymphocyte differentiation	1.15177211433506e-08	12.0879120879121	JUNB/ZFP36L2/AMBRA1/IL7R/CD69/ANXA1/SOCS1/ID2/BRD2/CD83/PRDM1	TandNK_PT
TandNK.GO:0046637	C2	regulation of alpha-beta T cell differentiation	1.27810679036113e-07	7.69230769230769	JUNB/CD69/ANXA1/SOCS1/BRD2/CD83/PRDM1	TandNK_PT
TandNK.GO:0006119	C3	oxidative phosphorylation	9.89506253767509e-29	10.7594936708861	ATP5MG/ATP5MF/COX8A/UQCR11/COX6A1/MT-ATP8/MT-ATP6/MT-ND4L/MT-CO3/ATP5F1E/COX5A/NDUFA1/UQCRB/MT-CYB/ATP5ME/NDUFB1/COX7C/DNAJC15/UQCR10/ATP5IF1/NDUFA6/NDUFA4/COX7A2/UQCRH/UQCRQ/NDUFS5/NDUFB11/NDUFB2/ATP5PF/NDUFA3/NDUFA2/COX6B1/ATP5PD/COX5B	TandNK_LyM
TandNK.GO:0009060	C3	aerobic respiration	1.67841380611875e-25	11.0759493670886	ATP5MG/ATP5MF/COX8A/UQCR11/COX6A1/MT-ATP8/MT-ATP6/SUCLG1/MT-ND4L/MT-CO3/ATP5F1E/COX5A/NDUFA1/UQCRB/MT-CYB/ATP5ME/NDUFB1/COX7C/DNAJC15/UQCR10/ATP5IF1/NDUFA6/NDUFA4/COX7A2/UQCRH/UQCRQ/NDUFS5/NDUFB11/NDUFB2/ATP5PF/NDUFA3/NDUFA2/COX6B1/ATP5PD/COX5B	TandNK_LyM
TandNK.GO:0045333	C3	cellular respiration	1.62085189747906e-22	11.0759493670886	ATP5MG/ATP5MF/COX8A/UQCR11/COX6A1/MT-ATP8/MT-ATP6/SUCLG1/MT-ND4L/MT-CO3/ATP5F1E/COX5A/NDUFA1/UQCRB/MT-CYB/ATP5ME/NDUFB1/COX7C/DNAJC15/UQCR10/ATP5IF1/NDUFA6/NDUFA4/COX7A2/UQCRH/UQCRQ/NDUFS5/NDUFB11/NDUFB2/ATP5PF/NDUFA3/NDUFA2/COX6B1/ATP5PD/COX5B	TandNK_LyM
Fibroblasts.GO:0030198...1	C1	extracellular matrix organization	2.28972299585231e-20	9.44558521560575	ABI3BP/COL4A1/LAMC1/COL15A1/CYP1B1/COL4A2/CRTAP/LOXL1/LRP1/MFAP4/SH3PXD2B/EMILIN1/COL18A1/APP/TNFRSF1A/GAS6/FBLN1/SFRP2/CST3/OLFML2B/APBB2/NID1/COL16A1/MMP14/FBLN5/COL6A1/TGFB1/LAMB1/FMOD/SERPINH1/ADAMTS2/COL12A1/RUNX1/COL14A1/TGFBI/FKBP10/CRISPLD2/SULF2/B4GALT1/LAMA2/PLOD1/PLOD2/LOX/ECM2/MMP2/ANTXR1	Fibroblasts_BM
Fibroblasts.GO:0043062...2	C1	extracellular structure organization	2.58633836834475e-20	9.44558521560575	ABI3BP/COL4A1/LAMC1/COL15A1/CYP1B1/COL4A2/CRTAP/LOXL1/LRP1/MFAP4/SH3PXD2B/EMILIN1/COL18A1/APP/TNFRSF1A/GAS6/FBLN1/SFRP2/CST3/OLFML2B/APBB2/NID1/COL16A1/MMP14/FBLN5/COL6A1/TGFB1/LAMB1/FMOD/SERPINH1/ADAMTS2/COL12A1/RUNX1/COL14A1/TGFBI/FKBP10/CRISPLD2/SULF2/B4GALT1/LAMA2/PLOD1/PLOD2/LOX/ECM2/MMP2/ANTXR1	Fibroblasts_BM
Fibroblasts.GO:0045229...3	C1	external encapsulating structure organization	2.92003546107515e-20	9.44558521560575	ABI3BP/COL4A1/LAMC1/COL15A1/CYP1B1/COL4A2/CRTAP/LOXL1/LRP1/MFAP4/SH3PXD2B/EMILIN1/COL18A1/APP/TNFRSF1A/GAS6/FBLN1/SFRP2/CST3/OLFML2B/APBB2/NID1/COL16A1/MMP14/FBLN5/COL6A1/TGFB1/LAMB1/FMOD/SERPINH1/ADAMTS2/COL12A1/RUNX1/COL14A1/TGFBI/FKBP10/CRISPLD2/SULF2/B4GALT1/LAMA2/PLOD1/PLOD2/LOX/ECM2/MMP2/ANTXR1	Fibroblasts_BM
Fibroblasts.GO:0030198...4	C2	extracellular matrix organization	7.65181946163826e-20	15.7894736842105	ABI3BP/LAMC1/COL15A1/CYP1B1/CRTAP/LOXL1/LRP1/MFAP4/SH3PXD2B/EMILIN1/COL18A1/APP/TNFRSF1A/FBLN1/NID1/COL16A1/MMP14/COL6A1/FMOD/SERPINH1/ADAMTS2/COL14A1/TGFBI/LOX/MMP2/COL3A1/ELN/COL1A1/PDGFRA/HMCN1	Fibroblasts_PT
Fibroblasts.GO:0043062...5	C2	extracellular structure organization	8.3221950351664e-20	15.7894736842105	ABI3BP/LAMC1/COL15A1/CYP1B1/CRTAP/LOXL1/LRP1/MFAP4/SH3PXD2B/EMILIN1/COL18A1/APP/TNFRSF1A/FBLN1/NID1/COL16A1/MMP14/COL6A1/FMOD/SERPINH1/ADAMTS2/COL14A1/TGFBI/LOX/MMP2/COL3A1/ELN/COL1A1/PDGFRA/HMCN1	Fibroblasts_PT
Fibroblasts.GO:0045229...6	C2	external encapsulating structure organization	9.04873102216317e-20	15.7894736842105	ABI3BP/LAMC1/COL15A1/CYP1B1/CRTAP/LOXL1/LRP1/MFAP4/SH3PXD2B/EMILIN1/COL18A1/APP/TNFRSF1A/FBLN1/NID1/COL16A1/MMP14/COL6A1/FMOD/SERPINH1/ADAMTS2/COL14A1/TGFBI/LOX/MMP2/COL3A1/ELN/COL1A1/PDGFRA/HMCN1	Fibroblasts_PT
Fibroblasts.GO:0006119	C3	oxidative phosphorylation	2.77967454617284e-25	7.34126984126984	UQCR11/ATP5MG/ATP5MF/COX6A1/NDUFA11/MT-ATP8/NDUFC2/COX8A/NDUFA13/ATP5PO/ATP5F1E/NDUFA4/NDUFA1/UQCRB/NDUFS5/ATP5ME/NDUFA3/NDUFB2/UQCRQ/COX6C/COX7C/UQCR10/COX6B1/NDUFS4/NIPSNAP2/NDUFA10/NDUFA6/COX7A1/DNAJC15/NDUFB1/NDUFA12/COX5B/NDUFB9/NDUFB7/CYCS/NDUFS6/NDUFA2	Fibroblasts_LyM
Fibroblasts.GO:0009060	C3	aerobic respiration	1.36439239820554e-22	7.73809523809524	UQCR11/ATP5MG/ATP5MF/COX6A1/NDUFA11/MT-ATP8/NDUFC2/COX8A/NDUFA13/ATP5PO/ATP5F1E/SUCLG1/NDUFA4/BLOC1S1/NDUFA1/UQCRB/NDUFS5/ATP5ME/NDUFA3/NDUFB2/UQCRQ/COX6C/COX7C/UQCR10/COX6B1/NDUFS4/NIPSNAP2/NDUFA10/NDUFA6/COX7A1/DNAJC15/NDUFB1/NDUFA12/COX5B/NDUFB9/NDUFB7/CYCS/NDUFS6/NDUFA2	Fibroblasts_LyM
Fibroblasts.GO:0042773	C3	ATP synthesis coupled electron transport	5.23573223958696e-21	5.55555555555556	UQCR11/COX6A1/NDUFC2/COX8A/NDUFA4/NDUFA1/UQCRB/NDUFS5/NDUFA3/NDUFB2/UQCRQ/COX6C/COX7C/UQCR10/COX6B1/NDUFS4/NDUFA10/NDUFA6/COX7A1/DNAJC15/NDUFB1/NDUFA12/COX5B/NDUFB9/NDUFB7/CYCS/NDUFS6/NDUFA2	Fibroblasts_LyM
ECs.GO:0043542	C1	endothelial cell migration	6.86368963757077e-14	16.6666666666667	HSPB1/SOX18/PLK2/KLF4/PTK2/PTPRM/JCAD/VEGFC/EFNB2/KDR/CDH5/RHOB/NR4A1/ID1/TEK/PLXND1/EFNA1/GLUL	ECs_BM
ECs.GO:0045765	C1	regulation of angiogenesis	2.71546027574734e-10	14.8148148148148	HSPB1/KLF2/PLK2/KLF4/PTPRM/JCAD/VEGFC/KDR/CTNNB1/CDH5/RHOB/TEK/PLXND1/CD36/EFNA1/GLUL	ECs_BM
ECs.GO:1901342	C1	regulation of vasculature development	3.88450915354129e-10	14.8148148148148	HSPB1/KLF2/PLK2/KLF4/PTPRM/JCAD/VEGFC/KDR/CTNNB1/CDH5/RHOB/TEK/PLXND1/CD36/EFNA1/GLUL	ECs_BM
ECs.GO:0002181...4	C2	cytoplasmic translation	2.06931305727775e-08	12.1621621621622	RPS29/RPL37A/RPS18/RPL34/RPS21/RPS2/RPS8/RPL5/RPLP0	ECs_PT
ECs.GO:2001234	C2	negative regulation of apoptotic signaling pathway	3.75594576612166e-08	13.5135135135135	SNAI1/MCL1/SERPINE1/IER3/CD74/TNFAIP3/ENO1/THBS1/NR4A2/XBP1	ECs_PT
ECs.GO:0030511	C2	positive regulation of transforming growth factor beta receptor signaling pathway	1.7916106377346e-07	6.75675675675676	TGFBR3/CDKN1C/CITED2/THBS1/SDCBP	ECs_PT
ECs.GO:0002181...7	C3	cytoplasmic translation	7.43050315850836e-23	6.2992125984252	RPL21/RPL26/RPS26/RPL22/RPL9/RPL7/RPS27/RPL18A/RPL39/PABPC1/RPL23/RPS3A/RPS10/EIF2S2/RPS16/RPL13A/RPS28/RPL6/RPL41/EIF3A/RPS15A/RPL27A/RPL12/EIF3J/RPS15/RPL3/FAU/ZC3H15/HNRNPD/DENR/RPL31/RWDD1/DHX36/IMPACT/RPL35/YBX1/SYNCRIP/RPSA/RPL26L1/DHX29	ECs_LyM
ECs.GO:0006119	C3	oxidative phosphorylation	8.37050584996611e-21	5.66929133858268	ATP5MG/UQCR11/COX6A1/ATP5MF/ATP5PO/NDUFA11/COX8A/NDUFC2/NDUFA13/MT-ATP8/NDUFB8/COX7C/ATP5F1E/ATP5ME/UQCRB/NDUFA10/NDUFA1/NDUFB2/NDUFA4/NDUFA3/NDUFB1/COX6B1/NDUFS5/COX5B/NDUFS4/COX6C/NDUFA6/UQCRQ/NDUFS6/NDUFC1/UQCR10/NIPSNAP2/NDUFA12/NDUFA2/NDUFB11/NDUFA5	ECs_LyM
ECs.GO:0009060	C3	aerobic respiration	4.93720588467373e-19	6.14173228346457	ATP5MG/UQCR11/COX6A1/ATP5MF/ATP5PO/NDUFA11/COX8A/NDUFC2/NDUFA13/MT-ATP8/ARL2/NDUFB8/BLOC1S1/SUCLG1/COX7C/ATP5F1E/ATP5ME/UQCRB/NDUFA10/NDUFA1/NDUFB2/NDUFA4/NDUFA3/NDUFB1/COX6B1/NDUFS5/COX5B/NDUFS4/COX6C/NDUFA6/UQCRQ/NDUFS6/NDUFC1/UQCR10/NIPSNAP2/NDUFA12/NDUFA2/NDUFB11/NDUFA5	ECs_LyM
MastCells.GO:0006119...1	C1	oxidative phosphorylation	2.67066959480388e-12	38.0952380952381	MT-CO1/MT-CO3/MT-ND1/MT-ATP6/MT-CYB/MT-ND2/MT-CO2/COX6C	MastCells_BM
MastCells.GO:0019646	C1	aerobic electron transport chain	6.31884752060225e-12	33.3333333333333	MT-CO1/MT-CO3/MT-ND1/MT-CYB/MT-ND2/MT-CO2/COX6C	MastCells_BM
MastCells.GO:0042773	C1	ATP synthesis coupled electron transport	1.14121673956529e-11	33.3333333333333	MT-CO1/MT-CO3/MT-ND1/MT-CYB/MT-ND2/MT-CO2/COX6C	MastCells_BM
MastCells.GO:0002544	C2	chronic inflammatory response	3.45057891826691e-06	11.1111111111111	TNFAIP3/CEBPB/NFKBIZ	MastCells_PT
MastCells.GO:1903706	C2	regulation of hemopoiesis	2.93789350178488e-05	22.2222222222222	CEBPB/ZFP36/NFKBIA/NFKBIZ/ZFP36L2/CD69	MastCells_PT
MastCells.GO:0050727	C2	regulation of inflammatory response	3.17198702959171e-05	22.2222222222222	TNFAIP3/CEBPB/ZFP36/NFKBIA/KLF4/NFKBIZ	MastCells_PT
MastCells.GO:0006119...7	C3	oxidative phosphorylation	1.19698784473331e-11	18.8679245283019	ATP5MG/COX6A1/NDUFA11/UQCR11/ATP5PO/COX8A/ATP5MF/NDUFC2/NDUFA13/MT-ATP8	MastCells_LyM
MastCells.GO:0009060	C3	aerobic respiration	2.03360917718676e-10	18.8679245283019	ATP5MG/COX6A1/NDUFA11/UQCR11/ATP5PO/COX8A/ATP5MF/NDUFC2/NDUFA13/MT-ATP8	MastCells_LyM
MastCells.GO:0042776	C3	proton motive force-driven mitochondrial ATP synthesis	7.95503228568383e-10	13.2075471698113	ATP5MG/NDUFA11/ATP5PO/ATP5MF/NDUFC2/NDUFA13/MT-ATP8	MastCells_LyM
EpithelialCells.GO:0042026	C1	protein refolding	9.00133021616882e-08	13.3333333333333	HSPB1/HSPA1A/HSPA8/HSP90AA1	EpithelialCells_BM
EpithelialCells.GO:0006986	C1	response to unfolded protein	1.00595021616565e-07	20	HSPB1/HSPA1A/HSPA8/HSP90AA1/HSPH1/DNAJB1	EpithelialCells_BM
EpithelialCells.GO:0061077	C1	chaperone-mediated protein folding	1.24237922941206e-07	16.6666666666667	HSPB1/HSPA1A/HSPA8/HSPH1/DNAJB1	EpithelialCells_BM
EpithelialCells.GO:0002181	C2	cytoplasmic translation	5.38619459201962e-40	17.0940170940171	RPL34/RPL13/RPL10/RPS4X/RPL5/RPS14/RPS2/RPL37A/RPS9/EIF4A2/RPL19/RPS18/RPS11/YBX3/RPS6/RPL32/RPLP0/RPL4/RPL11/RPS8/RPL10A/RPL8/RPL7A/RPL35A/RPL18/RPS7/RPS29/RACK1/RPS23/RPL23A/RPL36/RPS20/RPL38/RPS13/RPL28/RPL29/CSDE1/PKM/EIF3E/EIF3M	EpithelialCells_PT
EpithelialCells.GO:1903706	C2	regulation of hemopoiesis	2.8401363757316e-14	12.8205128205128	HSPA1A/AMBRA1/ZFP36/CEBPB/JUNB/FOS/ACTB/NFKBIA/MYC/ZC3H12A/BCL6/KLF10/SFRP1/ANXA1/BRD2/RUNX1/HLA-B/LTF/CD74/MAFB/TRIB1/ZFP36L1/CTNNB1/FAM210B/ZFP36L2/STAT3/IRF1/NFKBIZ/TSC22D1/PIK3R1	EpithelialCells_PT
EpithelialCells.GO:0030099	C2	myeloid cell differentiation	8.69703444527899e-14	12.8205128205128	HSPA1A/ZFP36/CEBPB/JUNB/FOS/CD81/NFKBIA/MYC/RPS14/BCL6/KLF10/KLF2/SFRP1/RPS6/CITED2/APP/CDKN1C/RUNX1/MYH9/LTF/CD74/MAFB/ACTN1/TRIB1/IFI16/ZFP36L1/CTNNB1/FAM210B/STAT3/PIK3R1	EpithelialCells_PT
EpithelialCells.GO:0006119	C3	oxidative phosphorylation	3.762306742617e-26	6.30630630630631	COX6A1/ATP5MG/ATP5MF/MT-ATP8/UQCR11/COX8A/NDUFC2/ATP5PO/NDUFA11/NDUFA13/MT-ATP6/NDUFB8/NDUFA4/NDUFA10/NDUFB2/ATP5F1E/NDUFA1/DNAJC15/ATP5IF1/UQCR10/ATP5ME/NDUFA3/NDUFA5/COX7A2/NIPSNAP2/UQCRB/COX6B1/NDUFB11/COX7C/NDUFB1/NDUFA2/NDUFB9/ATP5PF/COX5B/NDUFA6/MT-ND4L/MT-ND4/NDUFS2/NDUFV3/NDUFS8/NDUFB10/SDHC	EpithelialCells_LyM
EpithelialCells.GO:0042776	C3	proton motive force-driven mitochondrial ATP synthesis	7.94652582191258e-26	4.5045045045045	ATP5MG/ATP5MF/MT-ATP8/NDUFC2/ATP5PO/NDUFA11/NDUFA13/MT-ATP6/NDUFB8/NDUFA10/NDUFB2/ATP5F1E/NDUFA1/ATP5IF1/ATP5ME/NDUFA3/NDUFA5/NDUFB11/NDUFB1/NDUFA2/NDUFB9/ATP5PF/NDUFA6/MT-ND4L/MT-ND4/NDUFS2/NDUFV3/NDUFS8/NDUFB10/SDHC	EpithelialCells_LyM
EpithelialCells.GO:0008380	C3	RNA splicing	3.60612282938613e-24	10.5105105105105	RPS26/HNRNPA1/SNRPD3/LARP7/PABPC1/RBM25/PRPF40A/SRSF11/SON/TIA1/THOC2/ZC3H13/TMBIM6/SNRNP27/SRRM1/SNRPB2/YTHDC1/SYF2/ZRANB2/PRPF6/PPIG/LUC7L3/RSRC1/HTATSF1/CIR1/CWF19L2/CWC15/THRAP3/ZMAT2/IK/HNRNPA3/RBMX/UBL5/ZCRB1/RBM17/SNRPC/PRKRIP1/SREK1/SCAF11/REST/SREK1IP1/CDK11B/PNN/HNRNPR/NCL/RBM8A/PRPF38B/ACIN1/SNRPE/NSRP1/RBM39/VIRMA/UPF3A/SFSWAP/SRSF4/ZNF326/DDX1/SNRPD2/SF3B2/WBP11/TXNL4A/FRG1/DDX46/C9o…	EpithelialCells_LyM
PlasmaCells.GO:0002181...1	C1	cytoplasmic translation	2.35831153106815e-09	9.16030534351145	EIF4A2/RPLP0/RPL10/CSDE1/RPS11/RPS4X/RPS14/CPEB4/RPL4/RPL29/RPL10A/HNRNPU	PlasmaCells_BM
PlasmaCells.GO:0006417	C1	regulation of translation	2.41671922927306e-09	13.7404580152672	ZFP36/EIF2AK3/EIF4A2/PPP1R15A/CALR/EEF2/EIF4G2/HSPB1/RPL10/BTG2/CSDE1/RPS4X/RPS14/CPEB4/EIF1/DDX3X/HNRNPU/EIF4A3	PlasmaCells_BM
PlasmaCells.GO:0048545	C1	response to steroid hormone	1.40760174448179e-08	11.4503816793893	HSPA1A/HSPA8/ZFP36/PTGES3/CALR/JUNB/RHOA/FOSB/JUND/MT-ND3/DDX17/CD38/JUN/CFLAR/HNRNPU	PlasmaCells_BM
PlasmaCells.GO:0002181...4	C2	cytoplasmic translation	7.47910837675725e-43	29.5652173913043	EIF4A2/RPS11/RPS14/RPL19/RPS29/RPL13/RPL37A/RPL34/RPS18/RPL23A/RPS23/RPL38/RPL14/RPL32/RPL30/RPS21/RPS3/RPL35A/RPL11/RPS20/RPS12/RPL37/RPS27A/RPS9/RPS6/RPS8/RPL5/RPL23/RPL28/RPL27A/RPL18/EIF5/RPS2/RPL36	PlasmaCells_PT
PlasmaCells.GO:0042254	C2	ribosome biogenesis	9.69853514495952e-11	13.9130434782609	RPS11/RPS14/DDX3X/RPS23/RPL38/RPL14/RPS21/RPL35A/RPL11/RPS12/RPS27A/RPS9/RPS6/RPS8/RPL5/EIF5	PlasmaCells_PT
PlasmaCells.GO:0022613	C2	ribonucleoprotein complex biogenesis	8.36219813968714e-09	14.7826086956522	RSRP1/RPS11/RPS14/DDX3X/RPS23/RPL38/RPL14/RPS21/RPL35A/RPL11/RPS12/RPS27A/RPS9/RPS6/RPS8/RPL5/EIF5	PlasmaCells_PT
PlasmaCells.GO:0002181...7	C3	cytoplasmic translation	7.00740964503794e-14	18.0555555555556	RPL21/RPS26/RPL9/RPS27/RPL26/RPL22/RPL7/RPL18A/EIF2S2/RPL39/EIF3A/RPL6/RPS3A	PlasmaCells_LyM
PlasmaCells.GO:0006119	C3	oxidative phosphorylation	4.68877895713696e-13	16.6666666666667	ATP5MG/UQCR11/MT-ATP8/COX7C/UQCRQ/MT-ND4L/COX7A2/NDUFA3/UQCRB/NDUFA1/NDUFA4/ATP5ME	PlasmaCells_LyM
PlasmaCells.GO:0009060	C3	aerobic respiration	1.40185185049034e-11	16.6666666666667	ATP5MG/UQCR11/MT-ATP8/COX7C/UQCRQ/MT-ND4L/COX7A2/NDUFA3/UQCRB/NDUFA1/NDUFA4/ATP5ME	PlasmaCells_LyM
BCells.GO:0006457	C1	protein folding	9.03460077848118e-12	16.6666666666667	HSPA1A/DNAJB1/HSP90AA1/HSPA8/HSP90AB1/HSPD1/HSPH1/HSPB1/PTGES3/DNAJA1/TCP1/CCT4/WIPF1	BCells_BM
BCells.GO:0006986	C1	response to unfolded protein	2.10444817630041e-11	14.1025641025641	HSPA1A/DNAJB1/HSP90AA1/HSPA8/HSP90AB1/HSPD1/HSPH1/HSPB1/DNAJA1/PPP1R15A/ATF3	BCells_BM
BCells.GO:0006458	C1	'de novo' protein folding	2.38327513672105e-11	10.2564102564103	HSPA1A/DNAJB1/HSPA8/HSPD1/HSPH1/PTGES3/TCP1/CCT4	BCells_BM
BCells.GO:0002181...4	C2	cytoplasmic translation	1.10919480173138e-14	20.6349206349206	RPS29/RPL23/RPL34/RPL27A/RPL19/RPL37A/RPL38/RPS21/RPS24/RPL36/RPL39/RPS15A/YBX1	BCells_PT
BCells.GO:0048545	C2	response to steroid hormone	0.000132858247288769	11.1111111111111	JUNB/ZFP36L2/JUND/DDIT4/TXNIP/AREG/SGK1	BCells_PT
BCells.GO:0002158	C2	osteoclast proliferation	0.000595821958159061	3.17460317460317	JUNB/TNFAIP3	BCells_PT
BCells.GO:0002181...7	C3	cytoplasmic translation	1.19326836369733e-19	16	RPL23/RPL27A/RPL39/RPS15A/RPL21/RPS26/RPL22/RPL26/RPL9/RPL7/RPS27/EIF2S2/RPL6/PABPC1/RPS16/EIF3A/RPS15/RPL18A/RPS28/RPS3A	BCells_LyM
BCells.GO:0048525	C3	negative regulation of viral process	1.8545681105711e-09	7.2	ISG15/MX1/CCL5/LARP7/IFITM2/ISG20/IFI16/STAT1/EIF2AK2	BCells_LyM
BCells.GO:0050792	C3	regulation of viral process	2.73967032333123e-09	8.8	ISG15/MX1/CCL5/LARP7/IFITM2/ISG20/HMGB1/IFI16/PABPC1/STAT1/EIF2AK2	BCells_LyM
